# Supplementary material for: ZFX acts as a transcriptional activator in multiple types of human tumors by binding downstream from transcription start sites at the majority of CpG island promoters
Source: PubMed Central journal article supplement (PMC5848610; doi:10.1101/gr.228809.117), 2018-03
Supplement: supp_gr.228809.117_Supplemental_Fig_S1.pdf [file supp_gr.228809.117_Supplemental_Fig_S1.pdf]

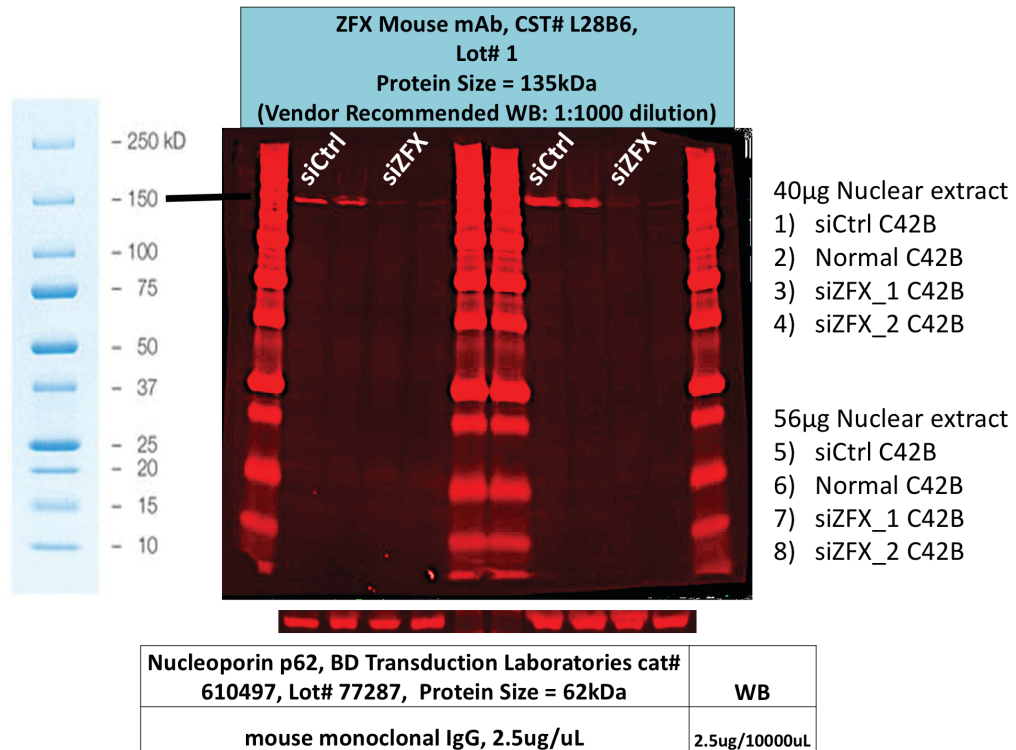

**Supplemental Figure S1. ZFX antibody validation.** Duplicate ZFX siRNA treatments of C42B cells were performed; 40ug of nuclear extract was analyzed on the left side of the gel and 56ug of nuclear extract was analyzed on the right side of the gel. A significantly reduced signal in the siZFX lanes can be seen using both amounts of nuclear extract. The Nucleoporin p62 antibody was used as a loading control; the p62 western blot image is also shown at the bottom.
