# Supplementary material for: ZFX acts as a transcriptional activator in multiple types of human tumors by binding downstream from transcription start sites at the majority of CpG island promoters
Source: PubMed Central journal article supplement (PMC5848610; doi:10.1101/gr.228809.117), 2018-03
Supplement: supp_gr.228809.117_Supplemental_Fig_S3.pdf [file supp_gr.228809.117_Supplemental_Fig_S3.pdf]

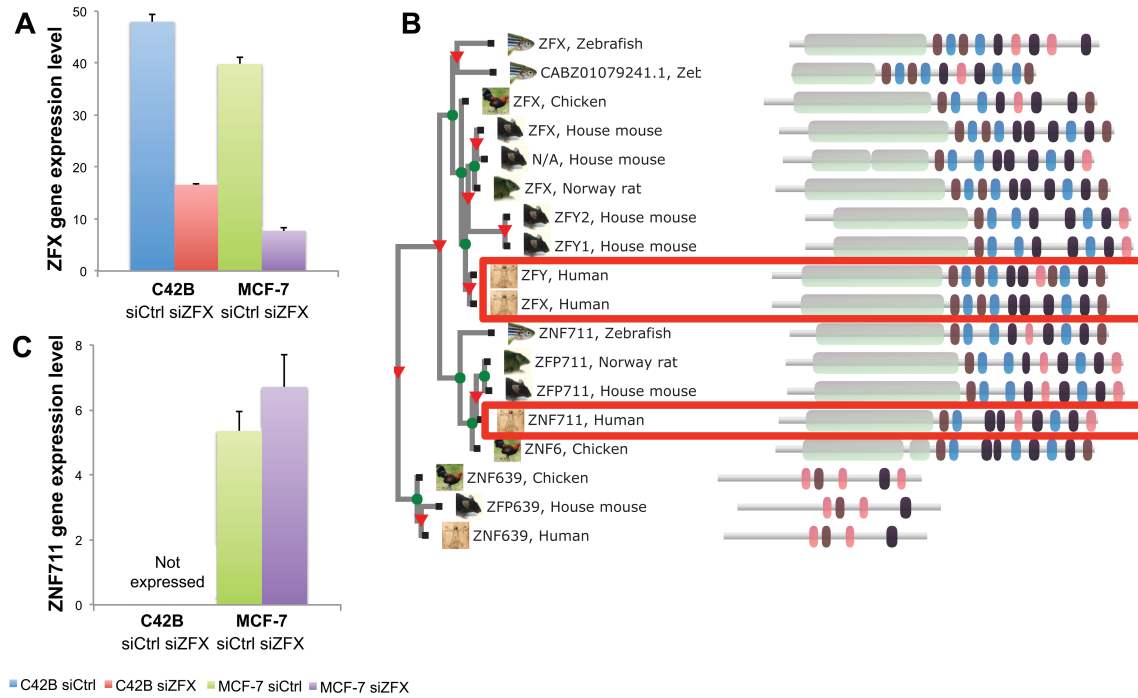

**Supplemental Figure S3. ZFX and ZNF711 may have redundant functions.** (A) Shown are expression levels of ZFX in C42B and MCF-7 upon ZFX knockdown. (B) Treefam gene tree analysis for the C2H2 ZNF family branch that includes ZFX. (C) Shown are expression levels of ZNF711 in C42B and MCF-7 cells upon ZFX knockdown.
