# Supplementary material for: ZFX acts as a transcriptional activator in multiple types of human tumors by binding downstream from transcription start sites at the majority of CpG island promoters
Source: PubMed Central journal article supplement (PMC5848610; doi:10.1101/gr.228809.117), 2018-03
Supplement: supp_gr.228809.117_Supplemental_Fig_S4.pdf [file supp_gr.228809.117_Supplemental_Fig_S4.pdf]

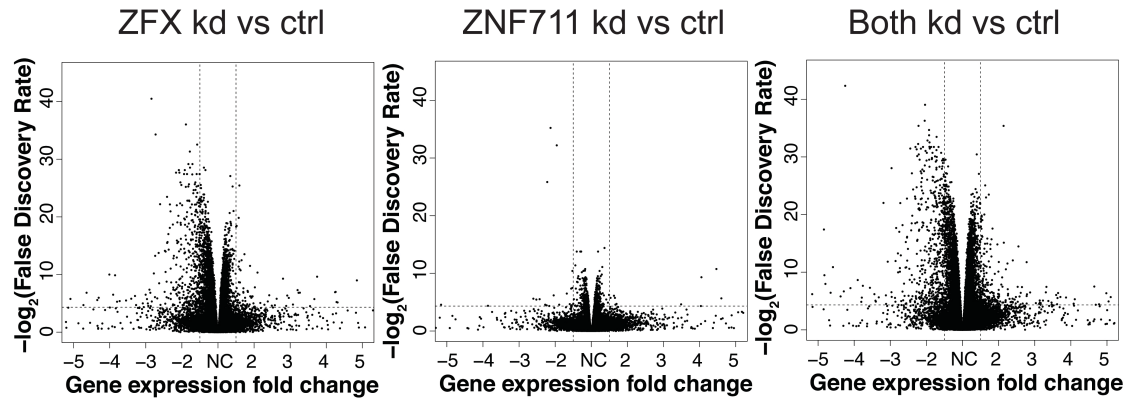

**Supplemental Figure S4. Knockdown of ZFX and ZNF711 in HEK293T cells.** Shown are volcano plots demonstrating differential gene expression after knockdown of ZFX, ZNF711, or both TFs in HEK293T cells (RNA-seq data are courtesy of W. Zhu and P.J. Farnham).
