# Supplementary material for: ZFX acts as a transcriptional activator in multiple types of human tumors by binding downstream from transcription start sites at the majority of CpG island promoters
Source: PubMed Central journal article supplement (PMC5848610; doi:10.1101/gr.228809.117), 2018-03
Supplement: supp_gr.228809.117_Supplemental_Fig_S6.pdf [file supp_gr.228809.117_Supplemental_Fig_S6.pdf]

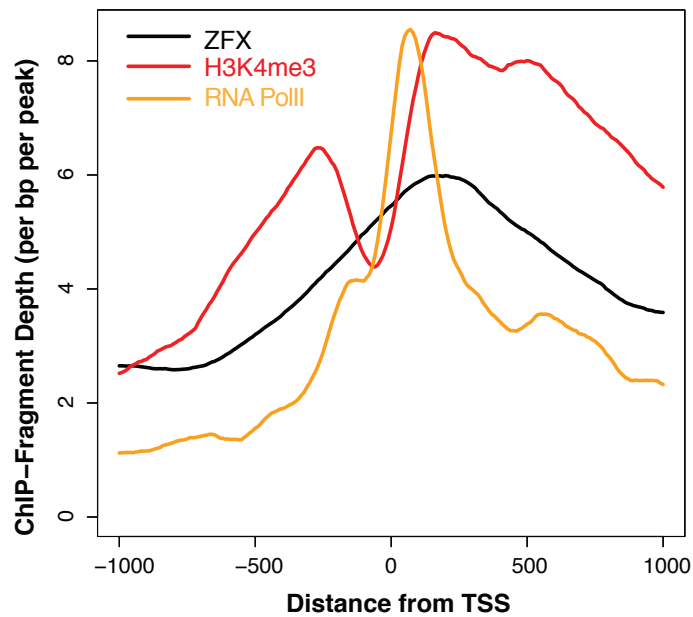

**Supplemental Figure S6. MCF-7 cell type-specific ZFX binding sites are also located at downstream of TSS.** Shown are the average ZFX (black), H3K4me3 (red), and RNA Polymerase II (orange) ChIP-seq signals  $\pm 1$ kb from the TSS of MCF-7 specific genes bound by ZFX (381 TSS sites which are bound by ZFX only in MCF-7).
