# Supplementary material for: ZFX acts as a transcriptional activator in multiple types of human tumors by binding downstream from transcription start sites at the majority of CpG island promoters
Source: Genome Res. 2018 Mar;28(3):310–20. doi: 10.1101/gr.228809.117 (PMC5848610; doi:10.1101/gr.228809.117)
Supplement: Supplemental Material [file supp_gr.228809.117_Supplemental_Table_S1.xlsx]

## Sheet: Table S1
Supplemental Table S1. Next generation sequencing data used in this study
Tissue type	Cell line	Assay	Notes	Data availability	Generated in this study
Kidney cancer	HEK293T	ZFX ChIP-seq	Rep1	GSE102616	✔
Kidney cancer	HEK293T	ZFX ChIP-seq	Rep2	GSE102616	✔
Kidney cancer	HEK293T	Input for ChIP-seq	Rep1	GSE102616	✔
Kidney cancer	HEK293T	Input for ChIP-seq	Rep2	GSE102616	✔
Colon cancer	HCT116	ZFX ChIP-seq	Rep1	GSE102616	✔
Colon cancer	HCT116	ZFX ChIP-seq	Rep2	GSE102616	✔
Colon cancer	HCT116	Input for ChIP-seq	Rep1	GSE102616	✔
Colon cancer	HCT116	Input for ChIP-seq	Rep2	GSE102616	✔
Prostate cancer	C42B	ZFX ChIP-seq	Rep1	GSE102616	✔
Prostate cancer	C42B	ZFX ChIP-seq	Rep2	GSE102616	✔
Prostate cancer	C42B	Input for ChIP-seq	Rep1	GSE102616	✔
Prostate cancer	C42B	Input for ChIP-seq	Rep2	GSE102616	✔
Breast cancer	MCF-7	ZFX ChIP-seq	Rep1	GSE102616	✔
Breast cancer	MCF-7	ZFX ChIP-seq	Rep2	GSE102616	✔
Breast cancer	MCF-7	ZNF711 ChIP-seq	Rep1	GSE102616	✔
Breast cancer	MCF-7	ZNF711 ChIP-seq	Rep2	GSE102616	✔
Breast cancer	MCF-7	Input for ChIP-seq	Rep1	GSE102616	✔
Breast cancer	MCF-7	Input for ChIP-seq	Rep2	GSE102616	✔
Breast cancer	MCF-7	Input for ChIP-seq	Rep3°	GSE102616	✔
Prostate cancer	C42B	siZFX RNA-seq	Rep1	GSE102616	✔
Prostate cancer	C42B	siZFX RNA-seq	Rep2	GSE102616	✔
Prostate cancer	C42B	siZFX RNA-seq	Rep3	GSE102616	✔
Prostate cancer	C42B	siCtrl RNA-seq	Rep1	GSE102616	✔
Prostate cancer	C42B	siCtrl RNA-seq	Rep2	GSE102616	✔
Prostate cancer	C42B	siCtrl RNA-seq	Rep3	GSE102616	✔
Breast cancer	MCF-7	siZFX RNA-seq	Rep1	GSE102616	✔
Breast cancer	MCF-7	siZFX RNA-seq	Rep2	GSE102616	✔
Breast cancer	MCF-7	siZFX RNA-seq	Rep3	GSE102616	✔
Breast cancer	MCF-7	siCtrl RNA-seq	Rep1	GSE102616	✔
Breast cancer	MCF-7	siCtrl RNA-seq	Rep2	GSE102616	✔
Breast cancer	MCF-7	siCtrl RNA-seq	Rep3	GSE102616	✔
Breast cancer	MCF-7	siBoth RNA-seq	Rep1	GSE102616	✔
Breast cancer	MCF-7	siBoth RNA-seq	Rep2	GSE102616	✔
Breast cancer	MCF-7	siBoth RNA-seq	Rep3	GSE102616	✔
Breast cancer	MCF-7	siZNF711 RNA-seq	Rep1	GSE102616	✔
Breast cancer	MCF-7	siZNF711 RNA-seq	Rep2	GSE102616	✔
Breast cancer	MCF-7	siZNF711 RNA-seq	Rep3	GSE102616	✔
Breast cancer	MCF-7	siZFX RNA-seq*	Rep1	GSE102616	✔
Breast cancer	MCF-7	siZFX RNA-seq*	Rep2	GSE102616	✔
Breast cancer	MCF-7	siZFX RNA-seq*	Rep3	GSE102616	✔
Breast cancer	MCF-7	siCtrl RNA-seq^	Rep1	GSE102616	✔
Breast cancer	MCF-7	siCtrl RNA-seq^	Rep2	GSE102616	✔
Breast cancer	MCF-7	siCtrl RNA-seq^	Rep3	GSE102616	✔
Normal prostate epithelial cells	PrEC	ZFX ChIP-seq		GSE102616	✔
Prostate cancer	C42B	PolII ChIP-seq		GSE102616	✔
Prostate cancer	C42B	H3K4me3 ChIP-seq		GSE102616	✔
Prostate cancer	C42B	NOMe-seq		GSE102616	✔
Breast cancer	MCF-7	NOMe-seq		GSE57498
Kidney cancer	HEK293T	H3K27Ac ChIP-seq		ENCODE (ENCSR000FCH)
Colon cancer	HCT116	H3K27Ac ChIP-seq		ENCODE (ENCSR000EUT)
Prostate cancer	C42B	H3K27Ac ChIP-seq		ENCODE (ENCSR279KIX)
Breast cancer	MCF-7	H3K27Ac ChIP-seq		ENCODE (ENCSR000EWR)
Kidney cancer	HEK293T	CTCF ChIP-seq		GSE68976
Colon cancer	HCT116	CTCF ChIP-seq		ENCODE (ENCSR000DTO)
Prostate cancer	C42B	CTCF ChIP-seq		ENCODE (ENCSR460LGH)
Breast cancer	MCF-7	CTCF ChIP-seq		ENCODE (ENCSR000DWH)
Breast cancer	MCF-7	H3K4me3 ChIP-seq		ENCODE (ENCSR000DWJ)
Breast cancer	MCF-7	PolII ChIP-seq		ENCODE (ENCSR000DMN)
Neuroblastoma	SHSY5Y	ZNF711 ChIP-seq		GSE20673
* The second MCF-7 siZFX RNA-seq data performed simultaenously with siZNF711 and siBoth experiments
^ The second MCF-7 control RNA-seq data performed simultaenously with siZNF711, siZFX, and siBoth experiments
° This input data were generated simultaneously with ZNF711 ChIP experiements in MCF-7
