# Supplementary material for: ZFX acts as a transcriptional activator in multiple types of human tumors by binding downstream from transcription start sites at the majority of CpG island promoters
Source: Genome Res. 2018 Mar;28(3):310–20. doi: 10.1101/gr.228809.117 (PMC5848610; doi:10.1101/gr.228809.117)
Supplement: Supplemental Material [file supp_gr.228809.117_Supplemental_Table_S2.xlsx]

## Sheet: Table S2
Supplemental Table S2. Classification of ZFX binding sites
A. Number of ZFX binding sites in promoter regions
	HEK293T	HCT116	C42B	MCF-7
Promoter (+/- 2kb of TSS)	8351	7450	7029	7087
Not in promoter	1604	1589	1679	2295
B. Number of ZFX binding sites in CpG island
	HEK293T	HCT116	C42B	MCF-7
CpG island	9131	8084	7426	7496
Not in CpG island	824	955	1282	1886
C. Number of ZFX binding sites in CpG island promoters
	HEK293T	HCT116	C42B	MCF-7
CpG island	7988	7045	6559	6555
Not in CpG island	363	405	470	532
D. Number of promoters with ZFX binding sites
	HEK293T	HCT116	C42B	MCF-7
Promoters with a bound ZFX	12398	10277	9432	9595
CpG island promoters with a bound ZFX	11960	9834	8948	9070
E. Number of active* promoters with ZFX binding sites
	C42B	MCF-7
Active promoters with a bound ZFX	8216 (42%)	8009 (45%)
Active CpG island promoters with a bound ZFX	7910 (58%)	7697 (59%)
* as defined by detectable expression of a transcript from that promoter in a particular cell line
