# Supplementary material for: ZFX acts as a transcriptional activator in multiple types of human tumors by binding downstream from transcription start sites at the majority of CpG island promoters
Source: Genome Res. 2018 Mar;28(3):310–20. doi: 10.1101/gr.228809.117 (PMC5848610; doi:10.1101/gr.228809.117)
Supplement: Supplemental Material [file supp_gr.228809.117_Supplemental_Table_S3.xlsx]

## Sheet: Table S3A
Supplemental Table S3A. ZFX binding sites in HEK293T
chr2	206949095	206951277	Peak_1	226159	.	456.592	22615.9	22606.4	1441
chr3	150320612	150322140	Peak_2	113534	.	257.618	11353.5	11346.5	747
chr10	103453386	103455699	Peak_3	108815	.	239.095	10881.6	10874.7	690
chr1	156732920	156738476	Peak_4	106526	.	226.727	10652.7	10645.9	4575
chr22	35653116	35654807	Peak_5	102650	.	202.039	10265.1	10258.4	538
chr3	47204284	47207269	Peak_6	98321	.	206.453	9832.17	9825.63	618
chr16	1358522	1371164	Peak_7	86189	.	205.596	8618.99	8612.64	713
chr5	413551	417830	Peak_8	80087	.	193.667	8008.73	8002.47	2160
chr22	21920167	21923810	Peak_9	71918	.	176.407	7191.9	7185.72	2071
chr7	135193889	135195824	Peak_10	65873	.	119.752	6587.36	6581.26	706
chr17	38136202	38137918	Peak_11	59479	.	152.258	5947.97	5941.94	991
chr12	112545595	112547881	Peak_12	59325	.	151.94	5932.55	5926.52	778
chr14	31675741	31678259	Peak_13	59325	.	151.94	5932.55	5926.52	964
chr12	53845508	53846867	Peak_14	57480	.	148.13	5748.05	5742.08	830
chr19	18941617	18945298	Peak_15	55078	.	143.141	5507.87	5501.94	1337
chr22	41696754	41699394	Peak_16	54296	.	141.509	5429.62	5423.71	1575
chrX	24166992	24168942	Peak_17	52801	.	138.379	5280.16	5274.27	1007
chr11	63603184	63608542	Peak_18	50604	.	133.753	5060.45	5054.61	3626
chr11	64682677	64685227	Peak_19	49084	.	130.533	4908.42	4902.6	1992
chr17	60004447	60005709	Peak_20	48288	.	114.553	4828.84	4823.04	657
chr19	48893227	48897545	Peak_21	46701	.	125.453	4670.16	4664.38	831
chr6	90061561	90063507	Peak_22	46574	.	125.181	4657.45	4651.68	596
chr7	148958450	148960266	Peak_23	45859	.	109.615	4585.92	4580.16	1060
chr17	48784119	48785665	Peak_24	44906	.	121.598	4490.64	4484.91	1093
chr5	141487487	141489403	Peak_25	44864	.	121.507	4486.43	4480.7	1201
chr2	162164477	162165671	Peak_26	44716	.	121.189	4471.7	4465.97	674
chr1	223899298	223901951	Peak_27	44320	.	84.4264	4432.06	4426.35	1040
chr10	180328	182775	Peak_28	42239	.	113.988	4223.96	4218.31	1519
chr6	26520532	26522968	Peak_29	41610	.	106.16	4161.02	4155.38	1699
chr17	45265701	45267153	Peak_30	40495	.	97.829	4049.52	4043.91	720
chr11	64873931	64887242	Peak_31	37928	.	106.358	3792.85	3787.3	10993
chr11	14541124	14542441	Peak_32	37560	.	105.542	3756.04	3750.49	579
chr7	148394701	148397268	Peak_33	36485	.	77.751	3648.56	3643.04	1548
chr6	116891914	116893667	Peak_34	36049	.	78.6185	3604.98	3599.46	701
chr1	29062688	29064659	Peak_35	35745	.	77.1577	3574.55	3569.03	1038
chr1	154192311	154194418	Peak_36	35361	.	85.1104	3536.14	3530.64	1445
chr17	60554236	60557517	Peak_37	34153	.	97.9221	3415.4	3409.93	2240
chr7	128167980	128172660	Peak_38	33832	.	97.1965	3383.25	3377.78	3670
chr7	129250580	129252826	Peak_39	32970	.	95.2462	3297.09	3291.65	1253
chr8	59571078	59572895	Peak_40	32591	.	94.3844	3259.15	3253.72	1054
chr9	21334579	21335752	Peak_41	32444	.	81.9431	3244.47	3239.04	656
chr10	116581110	116582711	Peak_42	32104	.	84.0366	3210.49	3205.07	730
chr7	148891417	148896605	Peak_43	31963	.	71.8161	3196.3	3190.89	1462
chr4	89443923	89445773	Peak_44	31775	.	92.5249	3177.52	3172.11	902
chr11	16759518	16760967	Peak_45	31219	.	91.2549	3121.98	3116.59	852
chr14	69617999	69620919	Peak_46	31200	.	91.2096	3120	3114.61	615
chr10	17243006	17244104	Peak_47	31049	.	81.6836	3104.98	3099.6	642
chr1	206785113	206786545	Peak_48	31003	.	75.2522	3100.31	3094.93	581
chr1	29507414	29509468	Peak_49	30753	.	67.3019	3075.32	3069.95	646
chr1	46766238	46773129	Peak_50	30567	.	89.7582	3056.74	3051.38	2206
chr19	16737612	16740247	Peak_51	30330	.	89.2139	3033.08	3027.72	870
chr10	94049920	94052121	Peak_52	30216	.	87.1749	3021.69	3016.34	1238
chr6	33755450	33758460	Peak_53	30055	.	88.579	3005.51	3000.17	1221
chr5	137687925	137689542	Peak_54	29809	.	87.0283	2980.94	2975.6	758
chr15	72765943	72768090	Peak_55	29666	.	73.6726	2966.69	2961.36	501
chr6	76311065	76312846	Peak_56	29662	.	87.6718	2966.2	2960.87	924
chr12	56650091	56653032	Peak_57	29622	.	87.5811	2962.28	2956.95	1865
chr2	160568431	160569845	Peak_58	29289	.	86.8101	2928.94	2923.63	794
chr3	50390478	50400315	Peak_59	29080	.	79.3902	2908.08	2902.78	6228
chr15	78729168	78731542	Peak_60	28681	.	76.984	2868.12	2862.83	1684
chr12	74931284	74933799	Peak_61	28620	.	85.0692	2862	2856.71	492
chr3	64008084	64009537	Peak_62	28533	.	68.7442	2853.33	2848.04	870
chr1	55679397	55682174	Peak_63	28255	.	64.5763	2825.54	2820.26	1416
chr20	62325270	62341192	Peak_64	28157	.	84.1795	2815.72	2810.45	13928
chr15	74894690	74909386	Peak_65	27562	.	76.2173	2756.26	2751.01	13558
chr18	29671490	29673627	Peak_66	27555	.	58.1925	2755.51	2750.26	1426
chr3	47843303	47846091	Peak_67	27226	.	82.0024	2722.61	2717.37	1441
chr19	33182225	33185247	Peak_68	27013	.	81.5035	2701.34	2696.12	1070
chr2	217362398	217364321	Peak_69	26955	.	81.3675	2695.55	2690.33	1328
chr2	27591749	27595069	Peak_70	26878	.	81.186	2687.83	2682.61	1992
chrX	54069952	54072068	Peak_71	26839	.	81.0953	2683.97	2678.75	640
chr1	11071742	11073509	Peak_72	26454	.	80.1882	2645.43	2640.23	1182
chr1	200638382	200639757	Peak_73	26356	.	69.3989	2635.64	2630.44	445
chr2	85642991	85646856	Peak_74	26319	.	79.8707	2631.97	2626.77	2478
chr22	17638901	17641430	Peak_75	26050	.	79.2357	2605.08	2599.89	1595
chrX	21857386	21858576	Peak_76	26002	.	78.4521	2600.21	2595.02	612
chr15	89876025	89879359	Peak_77	25915	.	71.742	2591.52	2586.34	1958
chr11	47787427	47791621	Peak_78	25801	.	78.6461	2580.15	2574.97	1145
chr5	176556897	176562358	Peak_79	25749	.	70.7696	2574.93	2569.75	4431
chr8	38238860	38241396	Peak_80	25571	.	78.1019	2557.17	2552.01	607
chr6	144163863	144165276	Peak_81	25428	.	64.9631	2542.81	2537.65	734
chr13	53023915	53025268	Peak_82	25399	.	77.6937	2539.97	2534.81	655
chr16	30620121	30623178	Peak_83	25337	.	64.0189	2533.79	2528.63	1279
chr15	66585133	66587117	Peak_84	25189	.	68.8257	2518.9	2513.75	839
chr14	75593055	75594490	Peak_85	25056	.	76.8773	2505.62	2500.48	528
chr1	87169566	87171405	Peak_86	25045	.	61.2142	2504.56	2499.42	1175
chr15	101833668	101836186	Peak_87	24583	.	71.0356	2458.38	2453.26	1505
chr3	25704838	25707120	Peak_88	24474	.	64.9787	2447.44	2442.33	1117
chr22	46066966	46068865	Peak_89	24390	.	75.2898	2439.06	2433.95	1239
chr5	36875220	36877999	Peak_90	24333	.	75.1538	2433.37	2428.26	2309
chr11	107879292	107880698	Peak_91	23875	.	69.0596	2387.53	2382.44	557
chr12	53892800	53904674	Peak_92	23766	.	73.7931	2376.6	2371.52	2388
chr5	179049359	179052479	Peak_93	23622	.	67.3911	2362.3	2357.22	1106
chr10	28820724	28823406	Peak_94	23464	.	73.0674	2346.43	2341.36	2286
chr19	30203613	30208635	Peak_95	23426	.	72.9767	2342.66	2337.59	2723
chr5	175790860	175797469	Peak_96	23037	.	67.6809	2303.78	2298.73	1898
chr2	85197059	85199673	Peak_97	23031	.	72.0242	2303.16	2298.11	2124
chr1	227126958	227130369	Peak_98	23004	.	48.6551	2300.48	2295.43	627
chr1	63153047	63154622	Peak_99	22985	.	57.4154	2298.51	2293.46	809
chr1	180470448	180472522	Peak_100	22663	.	62.6944	2266.31	2261.28	1329
chr10	44143127	44145092	Peak_101	22581	.	70.9357	2258.18	2253.15	986
chr6	28109174	28110240	Peak_102	22274	.	60.7742	2227.47	2222.45	614
chr20	57224400	57227849	Peak_103	22226	.	70.074	2222.68	2217.66	2088
chr1	3711921	3713639	Peak_104	22133	.	69.8472	2213.35	2208.34	899
chr1	90460232	90461486	Peak_105	21913	.	60.2437	2191.4	2186.4	674
chr16	66863403	66866535	Peak_106	21816	.	69.0762	2181.69	2176.69	1221
chr5	72793544	72795061	Peak_107	21816	.	69.0762	2181.69	2176.69	1031
chr1	40722993	40724821	Peak_108	21798	.	69.0308	2179.84	2174.84	513
chr3	57540360	57543577	Peak_109	21790	.	61.3968	2179.02	2174.02	1803
chr7	140395093	140399013	Peak_110	21787	.	55.3496	2178.77	2173.77	1687
chr11	11862662	11864389	Peak_111	21655	.	64.6466	2165.54	2160.55	1123
chr3	142719252	142721299	Peak_112	21616	.	60.243	2161.63	2156.64	1406
chr10	98345663	98347403	Peak_113	21600	.	62.1299	2160.04	2155.06	799
chr16	24550226	24552290	Peak_114	21575	.	68.4865	2157.54	2152.56	986
chr16	48277206	48279236	Peak_115	21371	.	67.9876	2137.15	2132.17	1352
chr15	68569280	68571472	Peak_116	21270	.	54.1015	2127.02	2122.05	992
chr1	67518608	67520361	Peak_117	21267	.	47.2871	2126.78	2121.81	1143
chr4	466926	468939	Peak_118	21260	.	67.7155	2126.03	2121.06	923
chr1	16693380	16694911	Peak_119	21157	.	66.407	2115.76	2110.8	512
chr5	135467788	135469658	Peak_120	21112	.	67.3526	2111.24	2106.27	961
chr20	17948513	17950262	Peak_121	20984	.	58.9853	2098.49	2093.53	832
chr7	72935370	72938089	Peak_122	20853	.	66.7177	2085.38	2080.43	795
chr5	77071057	77072559	Peak_123	20780	.	66.5363	2078.01	2073.06	768
chr11	65292430	65309587	Peak_124	20724	.	66.4002	2072.48	2067.53	331
chr7	92218757	92220541	Peak_125	20687	.	66.3095	2068.79	2063.85	850
chr1	32572136	32576545	Peak_126	20675	.	53.3374	2067.5	2062.56	1833
chr17	79603019	79604874	Peak_127	20660	.	63.453	2066.09	2061.15	938
chr10	65280345	65282203	Peak_128	20623	.	64.0212	2062.34	2057.4	1083
chr2	75872674	75874705	Peak_129	20522	.	65.9013	2052.23	2047.3	1399
chr13	95200651	95202828	Peak_130	20464	.	41.4335	2046.42	2041.49	1638
chr7	148822460	148824378	Peak_131	20455	.	56.7478	2045.5	2040.57	800
chr3	47863926	47868399	Peak_132	20443	.	64.4201	2044.34	2039.41	2694
chr3	15247317	15249028	Peak_133	20315	.	60.4732	2031.59	2026.67	754
chr7	131012110	131013447	Peak_134	20246	.	65.221	2024.67	2019.76	763
chr5	180686863	180690278	Peak_135	20243	.	62.4776	2024.37	2019.45	1852
chr6	24402855	24404064	Peak_136	20217	.	56.5356	2021.77	2016.85	565
chr1	146713846	146715419	Peak_137	20100	.	52.8074	2010.02	2005.11	794
chr10	6130540	6132236	Peak_138	20059	.	63.2167	2005.95	2001.04	708
chr1	173990519	173992119	Peak_139	20030	.	54.9747	2003.09	1998.18	509
chr9	35071419	35073282	Peak_140	19971	.	64.5406	1997.19	1992.29	634
chr3	33839667	33840898	Peak_141	19917	.	54.0485	1991.77	1986.87	562
chr14	54907293	54908461	Peak_142	19807	.	64.1324	1980.73	1975.84	597
chr19	8506207	8510956	Peak_143	19679	.	63.8149	1967.95	1963.06	3928
chr16	2797869	2803960	Peak_144	19661	.	63.7696	1966.12	1961.24	4553
chr22	39714182	39718651	Peak_145	19657	.	56.6176	1965.71	1960.83	1318
chr20	2450677	2451880	Peak_146	19606	.	63.6335	1960.65	1955.77	639
chr19	42746013	42749872	Peak_147	19551	.	63.4975	1955.18	1950.3	664
chr2	175112332	175114022	Peak_148	19536	.	60.1473	1953.68	1948.8	725
chr5	43556105	43558241	Peak_149	19479	.	53.5585	1947.94	1943.06	603
chr1	24306076	24308070	Peak_150	19478	.	63.316	1947.89	1943.01	583
chr1	70686156	70687951	Peak_151	19415	.	43.0476	1941.58	1936.71	1280
chr3	57677514	57680281	Peak_152	19391	.	62.851	1939.16	1934.3	1096
chr20	21283382	21284691	Peak_153	19387	.	63.0893	1938.78	1933.91	763
chr12	32829978	32833148	Peak_154	19351	.	62.9986	1935.14	1930.27	2493
chr17	11923740	11925227	Peak_155	19351	.	62.9986	1935.14	1930.27	709
chr3	101292482	101293983	Peak_156	19173	.	51.5133	1917.39	1912.53	879
chr14	69864030	69866090	Peak_157	19096	.	62.3636	1909.7	1904.85	721
chr17	61850202	61852410	Peak_158	19084	.	58.1773	1908.46	1903.61	1700
chr9	19048743	19050636	Peak_159	19068	.	52.8513	1906.84	1901.99	865
chr1	6684347	6691120	Peak_160	19060	.	62.2729	1906.07	1901.22	1097
chrX	106361255	106362316	Peak_161	19055	.	39.2352	1905.57	1900.73	633
chr1	16968459	16973793	Peak_162	19027	.	35.1915	1902.77	1897.93	2818
chr7	155435867	155438191	Peak_163	19013	.	46.5451	1901.36	1896.51	1628
chr21	47705512	47706780	Peak_164	18988	.	62.0914	1898.81	1893.97	461
chr2	176045324	176046868	Peak_165	18986	.	55.1461	1898.66	1893.81	519
chr5	131704854	131708579	Peak_166	18969	.	62.0461	1897	1892.16	566
chr10	131908143	131910413	Peak_167	18968	.	60.6758	1896.88	1892.04	813
chr3	52719268	52720705	Peak_168	18942	.	54.0889	1894.27	1889.43	909
chr17	66031447	66032625	Peak_169	18908	.	59.2971	1890.8	1885.96	655
chr1	182358868	182361945	Peak_170	18879	.	58.2622	1887.96	1883.12	1828
chr2	198363367	198365685	Peak_171	18854	.	59.1685	1885.43	1880.59	1031
chr22	20860142	20862853	Peak_172	18838	.	49.1139	1883.89	1879.06	1856
chr12	2984985	2987547	Peak_173	18734	.	61.4565	1873.46	1868.63	1011
chr20	32699107	32701416	Peak_174	18734	.	61.4565	1873.46	1868.63	746
chr3	51571622	51573890	Peak_175	18694	.	55.8301	1869.49	1864.67	1246
chr21	44310955	44314376	Peak_176	18666	.	61.0462	1866.68	1861.86	2702
chr14	95622697	95625297	Peak_177	18662	.	61.275	1866.22	1861.4	1327
chr1	243417634	243419942	Peak_178	18641	.	41.0885	1864.13	1859.31	1885
chr9	102860465	102862393	Peak_179	18626	.	61.1843	1862.61	1857.79	1283
chr2	64245558	64247223	Peak_180	18589	.	61.0936	1858.99	1854.18	1014
chr3	71801776	71804569	Peak_181	18571	.	61.0483	1857.19	1852.38	1433
chr18	19189893	19193024	Peak_182	18568	.	53.123	1856.87	1852.06	2604
chr1	225964148	225966198	Peak_183	18356	.	35.3787	1835.63	1830.83	1556
chr7	99155529	99157604	Peak_184	18319	.	60.4133	1831.94	1827.14	1082
chr10	7829356	7831235	Peak_185	18277	.	59.1862	1827.78	1822.98	981
chr10	88280515	88282386	Peak_186	18237	.	58.134	1823.74	1818.95	1367
chr2	99224292	99226508	Peak_187	18211	.	60.1412	1821.13	1816.35	885
chr20	30310283	30312314	Peak_188	18193	.	60.0958	1819.33	1814.55	919
chr2	172289483	172291556	Peak_189	18193	.	60.0958	1819.33	1814.55	1503
chr6	74229721	74231686	Peak_190	18157	.	60.0051	1815.74	1810.95	854
chrX	71496412	71497594	Peak_191	18109	.	46.6632	1810.99	1806.21	485
chr3	45729700	45731595	Peak_192	18043	.	57.4205	1804.35	1799.57	1366
chr3	138326469	138328399	Peak_193	18013	.	59.6422	1801.36	1796.58	1258
chr19	11067300	11072563	Peak_194	17977	.	59.5515	1797.77	1793	3869
chr11	118962619	118966489	Peak_195	17923	.	59.4155	1792.38	1787.61	3307
chr5	171432352	171435196	Peak_196	17882	.	50.8195	1788.24	1783.48	1063
chr11	126173368	126177167	Peak_197	17852	.	59.2341	1785.21	1780.45	495
chr5	130499861	130501282	Peak_198	17816	.	59.1433	1781.62	1776.86	495
chr17	78514787	78519719	Peak_199	17798	.	59.098	1779.83	1775.07	4070
chr7	148842872	148846978	Peak_200	17669	.	48.8732	1766.99	1762.24	1869
chr13	27825259	27826533	Peak_201	17655	.	58.7351	1765.51	1760.76	579
chr2	54342240	54343284	Peak_202	17601	.	58.5991	1760.14	1755.39	456
chr11	46614762	46615882	Peak_203	17547	.	58.463	1754.78	1750.03	602
chr5	78907557	78909002	Peak_204	17547	.	58.463	1754.78	1750.03	981
chr9	21993273	21996859	Peak_205	17471	.	48.3943	1747.14	1742.4	2675
chr2	58272904	58274793	Peak_206	17420	.	56.1428	1742.03	1737.29	1007
chr22	21332664	21338507	Peak_207	17381	.	52.1465	1738.12	1733.39	3667
chr16	22308442	22309825	Peak_208	17351	.	57.9641	1735.14	1730.41	505
chr20	18117967	18119317	Peak_209	17351	.	57.9641	1735.14	1730.41	749
chr11	94276631	94279503	Peak_210	17333	.	57.9188	1733.36	1728.63	592
chr3	43731523	43733350	Peak_211	17323	.	52.9064	1732.38	1727.65	916
chr15	102191790	102193871	Peak_212	17313	.	37.3078	1731.33	1726.6	579
chr12	27931704	27934332	Peak_213	17297	.	57.828	1729.79	1725.06	1631
chr1	226594679	226596873	Peak_214	17250	.	38.6482	1725.08	1720.35	820
chrX	130036599	130037563	Peak_215	17239	.	40.3342	1723.96	1719.23	521
chr13	79979220	79981047	Peak_216	17218	.	33.74	1721.82	1717.1	1365
chr20	3139155	3143300	Peak_217	17208	.	57.6013	1720.88	1716.16	1181
chr2	43036720	43039012	Peak_218	17191	.	57.5559	1719.1	1714.38	760
chr3	33154393	33156897	Peak_219	17060	.	51.9342	1706.07	1701.36	1398
chr15	59224958	59226547	Peak_220	17048	.	57.1931	1704.87	1700.16	565
chr7	32529358	32530326	Peak_221	17013	.	57.1024	1701.31	1696.6	488
chr15	102263906	102265182	Peak_222	16989	.	31.0041	1698.97	1694.26	527
chr15	76602986	76604227	Peak_223	16892	.	51.4689	1689.29	1684.59	600
chr3	39447753	39448923	Peak_224	16890	.	52.1488	1689.09	1684.39	677
chr7	152372366	152374023	Peak_225	16872	.	46.4208	1687.26	1682.56	630
chr1	109505095	109506789	Peak_226	16834	.	52.2218	1683.43	1678.74	760
chr16	15068429	15070787	Peak_227	16791	.	49.5674	1679.1	1674.41	721
chr6	131456072	131457502	Peak_228	16773	.	49.3123	1677.39	1672.7	574
chr16	30532534	30547654	Peak_229	16724	.	45.363	1672.42	1667.73	13364
chr5	68388550	68390609	Peak_230	16658	.	56.1953	1665.84	1661.16	1422
chr1	197871207	197872479	Peak_231	16590	.	44.3457	1659.05	1654.37	648
chr16	67926850	67928428	Peak_232	16587	.	56.0138	1658.77	1654.09	563
chr15	69744301	69746796	Peak_233	16580	.	50.1726	1658.07	1653.39	1035
chr11	576115	585248	Peak_234	16569	.	55.9685	1657	1652.32	431
chr16	4672629	4679289	Peak_235	16569	.	55.9685	1657	1652.32	2337
chr3	49976935	49978413	Peak_236	16516	.	55.8324	1651.69	1647.02	779
chr11	66239308	66250189	Peak_237	16481	.	55.7417	1648.16	1643.49	8341
chr9	130950828	130954620	Peak_238	16446	.	55.651	1644.63	1639.96	2987
chr3	157827556	157828644	Peak_239	16375	.	55.4696	1637.57	1632.9	507
chr7	6412878	6415363	Peak_240	16375	.	55.4696	1637.57	1632.9	1558
chr17	76249768	76250959	Peak_241	16322	.	55.3335	1632.28	1627.61	636
chr16	4318820	4324285	Peak_242	16252	.	55.1521	1625.23	1620.57	3141
chr20	25675494	25677839	Peak_243	16234	.	55.1067	1623.46	1618.81	1812
chrX	53253410	53255082	Peak_244	16234	.	55.1067	1623.46	1618.81	888
chr16	70284154	70289971	Peak_245	16181	.	54.9706	1618.18	1613.53	1495
chr17	38803423	38805286	Peak_246	16129	.	54.8346	1612.9	1608.25	632
chr3	107940658	107941653	Peak_247	16106	.	49.3509	1610.66	1606.01	473
chr3	128901636	128903566	Peak_248	16093	.	54.7439	1609.38	1604.73	1358
chr14	74035439	74038454	Peak_249	16076	.	54.6985	1607.62	1602.98	780
chr21	34913518	34916153	Peak_250	16067	.	45.4344	1606.79	1602.14	2020
chr7	73587193	73589571	Peak_251	15988	.	54.4717	1598.84	1594.2	1543
chr18	33708089	33710413	Peak_252	15865	.	37.7466	1586.55	1581.92	1529
chr3	40497749	40499596	Peak_253	15865	.	54.1543	1586.55	1581.92	1298
chr1	225614241	225616525	Peak_254	15794	.	35.9576	1579.41	1574.78	1227
chr22	38900777	38906586	Peak_255	15786	.	37.9083	1578.68	1574.05	1000
chr12	49109275	49111313	Peak_256	15672	.	53.6553	1567.28	1562.66	1046
chr2	198380223	198381553	Peak_257	15672	.	53.6553	1567.28	1562.66	717
chr10	22724398	22727008	Peak_258	15660	.	47.5278	1566.01	1561.39	1569
chr6	17705689	17707483	Peak_259	15655	.	53.61	1565.53	1560.91	726
chr15	65821766	65824320	Peak_260	15620	.	53.5193	1562.03	1557.41	1246
chr9	139614530	139626938	Peak_261	15620	.	53.5193	1562.03	1557.41	7973
chr1	224543720	224545473	Peak_262	15603	.	32.2541	1560.31	1555.69	1050
chr14	89028705	89030156	Peak_263	15532	.	53.2925	1553.29	1548.68	952
chr8	94711370	94713791	Peak_264	15515	.	53.2471	1551.54	1546.93	1756
chrX	154841772	154842998	Peak_265	15501	.	46.379	1550.19	1545.58	590
chr1	226249129	226251560	Peak_266	15439	.	33.0797	1543.93	1539.33	490
chr20	3023170	3031254	Peak_267	15428	.	53.0204	1542.82	1538.21	3732
chr20	44717554	44718924	Peak_268	15393	.	52.9297	1539.33	1534.72	843
chr2	85580830	85583089	Peak_269	15359	.	37.682	1535.95	1531.35	1121
chr16	58028717	58037314	Peak_270	15340	.	52.7936	1534.1	1529.5	5687
chr1	116380164	116382606	Peak_271	15328	.	45.8541	1532.87	1528.27	976
chr15	91444984	91450970	Peak_272	15293	.	51.9214	1529.31	1524.71	803
chr21	38361493	38363447	Peak_273	15265	.	47.5851	1526.6	1522.01	1116
chr10	120839228	120842177	Peak_274	15262	.	46.7812	1526.25	1521.66	808
chr1	226496073	226498681	Peak_275	15212	.	32.4958	1521.24	1516.65	1136
chr22	30752074	30754284	Peak_276	15177	.	44.6858	1517.72	1513.13	648
chr1	229693424	229695634	Peak_277	15170	.	41.0281	1517.04	1512.45	703
chr10	123733661	123735293	Peak_278	15114	.	52.204	1511.47	1506.89	868
chr1	63248763	63250284	Peak_279	15080	.	37.5164	1508.09	1503.51	923
chr11	77789837	77792039	Peak_280	15079	.	52.1133	1507.99	1503.41	983
chr9	138390258	138401022	Peak_281	15079	.	52.1133	1507.99	1503.41	2301
chr2	676832	677938	Peak_282	15045	.	52.0226	1504.52	1499.94	487
chr5	141347715	141349409	Peak_283	14941	.	51.7504	1494.11	1489.54	1162
chr1	224369739	224375385	Peak_284	14875	.	37.2231	1487.59	1483.02	1797
chr1	52607266	52608784	Peak_285	14871	.	51.569	1487.17	1482.61	954
chr6	170151087	170152827	Peak_286	14817	.	40.8795	1481.78	1477.22	868
chr7	150064924	150072841	Peak_287	14781	.	44.7589	1478.14	1473.58	571
chr15	52860220	52861913	Peak_288	14767	.	51.2969	1476.78	1472.22	754
chr1	62900248	62903674	Peak_289	14717	.	39.6048	1471.74	1467.18	1526
chr1	226269180	226276362	Peak_290	14701	.	35.6416	1470.19	1465.63	2300
chr16	278579	279770	Peak_291	14698	.	51.1155	1469.87	1465.31	717
chr5	72111761	72113339	Peak_292	14692	.	49.527	1469.23	1464.67	525
chr11	808373	810780	Peak_293	14664	.	51.0247	1466.41	1461.86	1062
chr1	227916293	227924131	Peak_294	14636	.	39.4447	1463.68	1459.13	6515
chr10	51564177	51565978	Peak_295	14630	.	48.0874	1463.08	1458.53	1268
chr15	65902100	65905004	Peak_296	14593	.	43.8918	1459.36	1454.81	1268
chr6	126277618	126278825	Peak_297	14586	.	43.0223	1458.61	1454.06	554
chr10	104175287	104188735	Peak_298	14560	.	50.7526	1456.05	1451.5	5837
chr19	1436465	1445859	Peak_299	14560	.	50.7526	1456.05	1451.5	2111
chr2	183902095	183903858	Peak_300	14543	.	50.7073	1454.32	1449.78	664
chr18	32923515	32924762	Peak_301	14521	.	36.9977	1452.13	1447.58	666
chr10	97802627	97804527	Peak_302	14514	.	47.2287	1451.41	1446.87	804
chr15	63794372	63798067	Peak_303	14456	.	50.4805	1445.7	1441.16	2684
chr2	24345765	24347209	Peak_304	14456	.	50.4805	1445.7	1441.16	753
chr16	2001932	2017876	Peak_305	14439	.	49.6609	1443.92	1439.39	7619
chr15	77362514	77366649	Peak_306	14430	.	43.0389	1443.09	1438.55	723
chr1	228279909	228298322	Peak_307	14421	.	35.3662	1442.2	1437.66	10962
chr1	197743641	197745511	Peak_308	14407	.	45.4631	1440.72	1436.18	463
chr1	224032433	224035212	Peak_309	14405	.	35.2634	1440.6	1436.06	1612
chr6	150038409	150039772	Peak_310	14372	.	49.2525	1437.28	1432.74	607
chr14	24422151	24423754	Peak_311	14370	.	50.2537	1437.09	1432.55	1004
chr9	102668551	102669810	Peak_312	14353	.	50.2083	1435.37	1430.83	653
chr5	172652884	172664542	Peak_313	14336	.	50.163	1433.64	1429.11	9037
chr2	18740869	18742357	Peak_314	14319	.	50.1176	1431.92	1427.39	849
chr3	122232762	122234490	Peak_315	14302	.	50.0723	1430.2	1425.68	821
chr1	38272371	38275157	Peak_316	14267	.	49.9816	1426.76	1422.24	1265
chr9	34328692	34330919	Peak_317	14267	.	49.9816	1426.76	1422.24	476
chr17	57968416	57971340	Peak_318	14250	.	49.9362	1425.05	1420.52	2056
chr4	85886524	85888523	Peak_319	14216	.	49.8455	1421.61	1417.09	710
chr11	46866932	46868243	Peak_320	14198	.	49.8001	1419.89	1415.37	720
chr1	110949114	110951420	Peak_321	14187	.	45.3692	1418.72	1414.21	1058
chr7	149192370	149195485	Peak_322	14166	.	40.3345	1416.62	1412.1	2272
chr2	217276727	217278091	Peak_323	14164	.	49.7094	1416.46	1411.94	550
chr7	154793210	154796338	Peak_324	14129	.	42.6364	1412.91	1408.39	2257
chr4	15656079	15658063	Peak_325	14095	.	49.528	1409.59	1405.08	625
chr7	73094860	73098812	Peak_326	14078	.	49.4827	1407.88	1403.37	2626
chr13	111805309	111806782	Peak_327	14061	.	49.4373	1406.16	1401.65	455
chr12	107167259	107169034	Peak_328	14010	.	49.3012	1401.02	1396.52	972
chr5	74160995	74163003	Peak_329	14010	.	49.3012	1401.02	1396.52	922
chr22	29998514	30000407	Peak_330	14009	.	36.8627	1400.94	1396.43	1355
chr16	69343127	69347102	Peak_331	13975	.	49.2105	1397.6	1393.09	2344
chr4	120987222	120988846	Peak_332	13975	.	49.2105	1397.6	1393.09	479
chr16	30811681	30818472	Peak_333	13947	.	38.068	1394.77	1390.27	5369
chr2	75937426	75939284	Peak_334	13941	.	49.1198	1394.17	1389.67	467
chr6	150181309	150186222	Peak_335	13928	.	42.0684	1392.88	1388.38	3897
chr13	42534419	42535787	Peak_336	13865	.	48.3523	1386.57	1382.07	902
chr20	47662084	47664234	Peak_337	13839	.	48.8477	1383.91	1379.42	1075
chr5	133511763	133513070	Peak_338	13839	.	48.8477	1383.91	1379.42	681
chr2	201675692	201677716	Peak_339	13822	.	48.8023	1382.2	1377.71	1194
chr5	137088564	137091670	Peak_340	13822	.	48.8023	1382.2	1377.71	1225
chr1	8021097	8022383	Peak_341	13804	.	48.757	1380.49	1376	849
chr11	85374716	85376434	Peak_342	13770	.	48.6663	1377.08	1372.59	1200
chr10	94332374	94334621	Peak_343	13738	.	45.4351	1373.85	1369.37	1224
chr6	170893022	170894287	Peak_344	13708	.	45.6141	1370.83	1366.35	555
chr11	126149241	126153831	Peak_345	13702	.	48.4848	1370.25	1365.77	3810
chr5	132298291	132300287	Peak_346	13702	.	48.4848	1370.25	1365.77	754
chr11	74203747	74205378	Peak_347	13651	.	48.3488	1365.13	1360.65	756
chr20	50807159	50809776	Peak_348	13651	.	48.3488	1365.13	1360.65	965
chr6	143832019	143835292	Peak_349	13631	.	42.8206	1363.18	1358.71	590
chr7	149534283	149536513	Peak_350	13623	.	40.3436	1362.35	1357.88	1429
chr1	70670743	70671958	Peak_351	13617	.	33.9289	1361.75	1357.27	766
chr6	28234617	28235556	Peak_352	13594	.	39.0009	1359.48	1355.01	442
chr16	4811688	4817621	Peak_353	13549	.	48.0766	1354.91	1350.44	5334
chr2	225448795	225450850	Peak_354	13549	.	48.0766	1354.91	1350.44	786
chr20	62285031	62298570	Peak_355	13515	.	47.9859	1351.51	1347.04	4445
chr17	65361931	65362995	Peak_356	13497	.	44.9108	1349.79	1345.33	549
chr11	9405535	9407255	Peak_357	13493	.	47.0117	1349.32	1344.85	823
chr12	120970765	120973146	Peak_358	13447	.	47.8045	1344.7	1340.24	1550
chr17	80003267	80026205	Peak_359	13428	.	47.6116	1342.8	1338.34	20456
chr3	32147064	32149047	Peak_360	13418	.	43.1821	1341.88	1337.42	783
chrX	119004543	119006787	Peak_361	13416	.	38.255	1341.65	1337.19	1411
chr7	149156212	149159093	Peak_362	13386	.	42.4643	1338.62	1334.16	905
chr6	2762939	2767069	Peak_363	13370	.	42.97	1337.09	1332.63	2977
chr17	16117956	16121150	Peak_364	13345	.	47.5324	1334.51	1330.06	1171
chr10	102984097	102992732	Peak_365	13332	.	47.2744	1333.22	1328.77	6023
chr15	83477156	83479584	Peak_366	13325	.	41.1124	1332.51	1328.06	1470
chr1	235291104	235293043	Peak_367	13312	.	31.5558	1331.21	1326.75	862
chr18	32868899	32870857	Peak_368	13279	.	31.424	1327.93	1323.47	1566
chr17	15902017	15904064	Peak_369	13277	.	47.351	1327.73	1323.28	1243
chr20	47893602	47896264	Peak_370	13260	.	47.3056	1326.03	1321.58	1301
chr15	75228149	75233109	Peak_371	13253	.	45.996	1325.37	1320.92	1980
chr17	20944067	20947778	Peak_372	13232	.	45.7875	1323.24	1318.79	1968
chr12	67662008	67664403	Peak_373	13226	.	47.2149	1322.64	1318.19	1900
chr16	21529288	21533487	Peak_374	13175	.	47.0788	1317.56	1313.12	2727
chr19	40022511	40024171	Peak_375	13175	.	47.0788	1317.56	1313.12	760
chr3	45634437	45639342	Peak_376	13175	.	47.0788	1317.56	1313.12	1345
chr20	35917408	35919194	Peak_377	13141	.	46.9881	1314.18	1309.73	871
chr7	100478856	100489174	Peak_378	13141	.	46.9881	1314.18	1309.73	8189
chr1	151137369	151140365	Peak_379	13125	.	35.7639	1312.59	1308.16	876
chr15	91071906	91074368	Peak_380	13124	.	46.9428	1312.48	1308.04	1482
chr20	16710084	16711428	Peak_381	13124	.	46.9428	1312.48	1308.04	688
chr3	121467792	121469210	Peak_382	13124	.	46.9428	1312.48	1308.04	476
chr15	65809168	65810984	Peak_383	13116	.	42.7478	1311.67	1307.23	699
chr6	144328226	144330166	Peak_384	13116	.	41.1613	1311.66	1307.22	1241
chr19	45001226	45005033	Peak_385	13107	.	46.8974	1310.79	1306.35	3197
chr17	54910344	54912875	Peak_386	13076	.	42.1691	1307.63	1303.19	1324
chr20	3798332	3801784	Peak_387	13074	.	46.8067	1307.41	1302.97	2550
chr7	40173580	40176048	Peak_388	13074	.	46.8067	1307.41	1302.97	447
chr16	30910058	30916582	Peak_389	13060	.	38.2862	1306.1	1301.67	3651
chr16	691415	704501	Peak_390	13057	.	46.7613	1305.72	1301.28	7631
chr3	141120492	141122011	Peak_391	13041	.	45.3685	1304.16	1299.72	474
chr17	29335047	29336691	Peak_392	13040	.	46.716	1304.03	1299.6	513
chr6	160147437	160149322	Peak_393	13012	.	44.8444	1301.24	1296.81	1397
chr2	32502692	32503725	Peak_394	12990	.	46.0843	1299.02	1294.59	429
chr21	33031525	33033009	Peak_395	12987	.	39.4763	1298.73	1294.3	691
chr17	80604553	80606547	Peak_396	12972	.	46.5346	1297.27	1292.85	1523
chr2	133104741	133105748	Peak_397	12935	.	35.0476	1293.51	1289.09	460
chr22	31795005	31796771	Peak_398	12918	.	40.7891	1291.88	1287.46	801
chr10	45495589	45497238	Peak_399	12902	.	43.5635	1290.25	1285.83	919
chr12	113620267	113625515	Peak_400	12888	.	46.3078	1288.84	1284.42	2778
chr11	61196582	61198040	Peak_401	12871	.	46.2624	1287.15	1282.73	729
chr10	88467044	88472675	Peak_402	12854	.	46.2171	1285.46	1281.05	4192
chr7	44529499	44530686	Peak_403	12820	.	46.1264	1282.09	1277.68	520
chr15	67812886	67814461	Peak_404	12805	.	36.3268	1280.57	1276.16	885
chr6	111278725	111280463	Peak_405	12782	.	38.2844	1278.24	1273.83	962
chr1	157106938	157109090	Peak_406	12768	.	38.6407	1276.83	1272.42	1612
chr3	48954563	48957565	Peak_407	12753	.	45.9449	1275.36	1270.95	1893
chr1	91869566	91870725	Peak_408	12710	.	39.6178	1271.08	1266.68	673
chr15	34501550	34502759	Peak_409	12686	.	45.7635	1268.63	1264.23	503
chr11	32913719	32915990	Peak_410	12671	.	38.8998	1267.17	1262.77	1233
chr5	145826397	145827874	Peak_411	12635	.	45.6275	1263.59	1259.19	815
chr4	128978770	128983741	Peak_412	12619	.	45.5821	1261.91	1257.52	3357
chr5	37247950	37250433	Peak_413	12619	.	45.5821	1261.91	1257.52	1294
chr5	176431875	176434297	Peak_414	12598	.	40.478	1259.86	1255.47	1634
chr1	166844540	166845912	Peak_415	12586	.	42.5313	1258.68	1254.29	761
chr2	105944662	105947566	Peak_416	12585	.	45.4914	1258.56	1254.16	1751
chr17	5341782	5343445	Peak_417	12568	.	45.446	1256.88	1252.48	460
chr21	35013341	35015869	Peak_418	12551	.	39.3615	1255.15	1250.76	571
chr7	158648627	158650913	Peak_419	12538	.	40.7849	1253.86	1249.47	896
chr4	110354220	110356143	Peak_420	12529	.	44.0675	1252.9	1248.51	939
chr12	40618083	40619248	Peak_421	12518	.	45.31	1251.85	1247.46	453
chr6	24494524	24496199	Peak_422	12516	.	42.3202	1251.61	1247.22	809
chr14	53173435	53174599	Peak_423	12503	.	44.788	1250.37	1245.98	713
chr9	117348705	117350919	Peak_424	12501	.	45.2646	1250.17	1245.78	1465
chr14	50998333	50999996	Peak_425	12451	.	45.1285	1245.14	1240.76	653
chr10	22629133	22630571	Peak_426	12439	.	37.8553	1243.99	1239.6	535
chr19	30432755	30434228	Peak_427	12433	.	41.5592	1243.38	1239	884
chr10	118895054	118898138	Peak_428	12417	.	45.0378	1241.8	1237.41	1807
chr18	48494020	48495208	Peak_429	12417	.	45.0378	1241.8	1237.41	536
chr11	47586472	47588191	Peak_430	12401	.	44.9925	1240.12	1235.74	726
chr19	4122814	4125474	Peak_431	12384	.	44.9471	1238.45	1234.07	1162
chr16	4587243	4589757	Peak_432	12367	.	44.9018	1236.77	1232.4	1684
chr7	94138165	94140382	Peak_433	12367	.	44.9018	1236.77	1232.4	1314
chr1	33114187	33118552	Peak_434	12367	.	32.7307	1236.73	1232.35	2848
chr7	12250248	12251571	Peak_435	12351	.	44.8564	1235.1	1230.73	892
chr12	111051373	111052549	Peak_436	12334	.	44.8111	1233.43	1229.06	769
chr2	48009096	48011463	Peak_437	12317	.	44.7657	1231.76	1227.39	1401
chr16	85831648	85834612	Peak_438	12267	.	44.6296	1226.75	1222.38	1306
chr7	98474836	98478268	Peak_439	12250	.	44.5843	1225.08	1220.71	1624
chr15	76628184	76636285	Peak_440	12218	.	43.2878	1221.87	1217.5	2226
chr14	45552901	45554021	Peak_441	12217	.	44.4936	1221.74	1217.37	643
chr17	80476671	80478797	Peak_442	12217	.	44.4936	1221.74	1217.37	583
chr1	228346503	228354783	Peak_443	12194	.	30.1613	1219.47	1215.1	7097
chr17	29297382	29299508	Peak_444	12167	.	44.3575	1216.73	1212.37	898
chr9	114244882	114247068	Peak_445	12150	.	44.3122	1215.07	1210.71	708
chr5	179125056	179126990	Peak_446	12149	.	39.8437	1214.91	1210.55	1199
chr22	29660791	29665849	Peak_447	12135	.	37.9144	1213.51	1209.15	3819
chr1	9293098	9296924	Peak_448	12134	.	44.2668	1213.4	1209.04	2004
chr4	103996974	103998278	Peak_449	12089	.	43.0909	1208.98	1204.62	744
chr3	57261197	57262827	Peak_450	12084	.	41.7587	1208.46	1204.1	931
chr8	103874992	103877303	Peak_451	12084	.	44.1307	1208.4	1204.05	1836
chr1	6258853	6260978	Peak_452	12067	.	44.0854	1206.74	1202.39	650
chr19	2218601	2238430	Peak_453	12050	.	44.04	1205.07	1200.72	18377
chr2	170683250	170685187	Peak_454	12050	.	44.04	1205.07	1200.72	1041
chr16	30885487	30887808	Peak_455	12046	.	34.6115	1204.62	1200.27	1172
chr3	169529638	169531240	Peak_456	12034	.	43.9947	1203.41	1199.06	714
chr7	6627400	6632703	Peak_457	12034	.	43.9947	1203.41	1199.06	2330
chr4	99181221	99183418	Peak_458	11984	.	43.8586	1198.42	1194.07	841
chr10	89577196	89578971	Peak_459	11963	.	36.7849	1196.35	1192	533
chr19	38145465	38147424	Peak_460	11950	.	43.7679	1195.1	1190.75	674
chr1	116959670	116963787	Peak_461	11931	.	39.5803	1193.15	1188.81	1483
chr12	104359135	104360359	Peak_462	11917	.	43.6772	1191.78	1187.43	744
chr20	62580129	62596151	Peak_463	11901	.	43.6318	1190.11	1185.77	7455
chr7	138719268	138721669	Peak_464	11898	.	33.8493	1189.87	1185.53	1405
chr11	8984963	8987592	Peak_465	11884	.	43.5865	1188.45	1184.12	1257
chr1	68961891	68963173	Peak_466	11871	.	33.733	1187.17	1182.84	611
chr14	74352454	74354347	Peak_467	11871	.	42.7259	1187.17	1182.83	1298
chr22	42016063	42018117	Peak_468	11851	.	43.4958	1185.14	1180.8	1446
chr14	90796970	90798592	Peak_469	11834	.	43.4504	1183.48	1179.14	1108
chr20	42085658	42088072	Peak_470	11834	.	43.4504	1183.48	1179.14	1137
chr20	57616267	57618742	Peak_471	11813	.	42.7511	1181.39	1177.06	1346
chr22	38239588	38240985	Peak_472	11807	.	41.5126	1180.78	1176.45	528
chr4	77133918	77137434	Peak_474	11801	.	43.3597	1180.16	1175.83	1115
chr15	77223528	77224878	Peak_475	11794	.	33.6536	1179.45	1175.12	790
chr7	140370318	140375043	Peak_476	11758	.	35.1506	1175.83	1171.5	2705
chr17	39961573	39982913	Peak_477	11752	.	40.2006	1175.22	1170.9	6354
chr20	34251542	34254588	Peak_478	11728	.	43.1055	1172.82	1168.5	1015
chr19	11483368	11488049	Peak_479	11723	.	43.0547	1172.32	1168	2107
chr9	37421947	37423905	Peak_480	11718	.	43.1329	1171.88	1167.56	910
chr22	20845970	20852829	Peak_481	11711	.	40.9289	1171.12	1166.79	3812
chr3	49048377	49067229	Peak_482	11702	.	43.0876	1170.22	1165.9	10433
chr5	134733707	134736856	Peak_483	11702	.	43.0876	1170.22	1165.9	870
chr15	90454966	90457090	Peak_484	11698	.	40.4763	1169.9	1165.58	1131
chr6	170614696	170616598	Peak_485	11680	.	37.7849	1168.08	1163.76	1254
chr5	138939594	138942078	Peak_486	11669	.	42.9969	1166.92	1162.6	1962
chr14	75229731	75231231	Peak_487	11657	.	42.5084	1165.71	1161.39	422
chr19	59025823	59032841	Peak_488	11636	.	42.9061	1163.61	1159.29	5313
chr20	32887511	32891829	Peak_489	11636	.	42.9061	1163.61	1159.29	3145
chr4	184364892	184366645	Peak_490	11636	.	42.9061	1163.61	1159.29	1045
chr5	179241608	179249031	Peak_491	11636	.	42.9061	1163.61	1159.29	6464
chr6	158243407	158245453	Peak_492	11636	.	42.9061	1163.61	1159.29	1108
chr16	1523231	1526238	Peak_493	11619	.	42.8608	1161.96	1157.64	2040
chr16	29622637	29626639	Peak_494	11603	.	42.8154	1160.3	1155.99	2612
chr3	49502516	49508579	Peak_495	11603	.	42.8154	1160.3	1155.99	5544
chr9	110044869	110046727	Peak_496	11603	.	42.8154	1160.3	1155.99	1201
chr1	229476451	229480321	Peak_497	11592	.	30.5213	1159.29	1154.98	1599
chr16	47006559	47008239	Peak_498	11586	.	42.7701	1158.65	1154.34	904
chr15	90118222	90119829	Peak_499	11570	.	42.7247	1157	1152.69	777
chr17	21212978	21227554	Peak_500	11567	.	30.4254	1156.76	1152.45	7279
chr1	44819862	44821938	Peak_501	11564	.	42.0652	1156.49	1152.17	925
chr10	1101692	1103468	Peak_502	11535	.	38.7511	1153.52	1149.22	722
chr17	66094163	66098921	Peak_503	11504	.	42.0571	1150.41	1146.1	3805
chr3	121263971	121265116	Peak_504	11471	.	42.4526	1147.1	1142.8	542
chr17	21116590	21120641	Peak_505	11470	.	36.9669	1147.05	1142.74	620
chr7	141249795	141251775	Peak_506	11442	.	30.9416	1144.25	1139.95	1542
chr17	18148141	18169801	Peak_507	11438	.	41.8785	1143.84	1139.53	13742
chr4	56261481	56263567	Peak_508	11438	.	42.3619	1143.81	1139.51	947
chr19	33863903	33865701	Peak_509	11421	.	42.3165	1142.16	1137.86	946
chr22	32869563	32871846	Peak_510	11417	.	35.0335	1141.77	1137.47	1320
chr16	89621372	89633414	Peak_511	11405	.	42.2712	1140.51	1136.22	5954
chr2	29116856	29118674	Peak_512	11405	.	42.2712	1140.51	1136.22	975
chr2	70417307	70418754	Peak_513	11405	.	42.2712	1140.51	1136.22	703
chr14	60558183	60559554	Peak_514	11396	.	36.9224	1139.66	1135.36	626
chr1	93296857	93298528	Peak_515	11378	.	35.7232	1137.89	1133.59	892
chr1	226063846	226071916	Peak_516	11372	.	28.275	1137.24	1132.94	6492
chr1	201951083	201952781	Peak_517	11339	.	41.6107	1133.99	1129.7	874
chr2	74153759	74154591	Peak_518	11322	.	36.4887	1132.29	1128	450
chr5	154133824	154137231	Peak_519	11306	.	41.999	1130.64	1126.35	553
chr17	39844570	39846449	Peak_520	11284	.	34.4196	1128.45	1124.16	844
chr5	180665441	180672194	Peak_521	11279	.	41.4804	1127.92	1123.63	5151
chr11	43333243	43334602	Peak_522	11273	.	41.9083	1127.36	1123.07	479
chr8	42947619	42949571	Peak_523	11273	.	41.9083	1127.36	1123.07	1201
chr3	135913241	135916304	Peak_524	11257	.	41.863	1125.71	1121.43	2448
chr6	125622395	125623474	Peak_525	11251	.	32.8951	1125.17	1120.89	557
chr5	137910420	137912700	Peak_526	11250	.	40.1455	1125.07	1120.79	469
chr1	179923002	179924753	Peak_527	11235	.	31.9013	1123.57	1119.29	1099
chr10	5929471	5933154	Peak_528	11224	.	41.7722	1122.43	1118.15	2252
chr14	103798915	103801895	Peak_529	11224	.	41.7722	1122.43	1118.15	1132
chr1	228644696	228647445	Peak_530	11212	.	26.7417	1121.26	1116.98	539
chr19	35167579	35169669	Peak_531	11191	.	41.6815	1119.15	1114.87	1170
chr11	34937098	34938893	Peak_532	11158	.	41.5908	1115.87	1111.59	603
chr16	68876769	68878481	Peak_533	11158	.	41.5908	1115.87	1111.59	868
chr1	95698761	95700484	Peak_534	11158	.	41.5908	1115.87	1111.59	1146
chr7	108209424	108211259	Peak_535	11158	.	41.5908	1115.87	1111.59	492
chr11	61128632	61130839	Peak_536	11126	.	37.8877	1112.65	1108.38	1053
chr1	231556436	231558715	Peak_537	11124	.	25.1679	1112.43	1108.15	1312
chr1	36915179	36917193	Peak_538	11109	.	41.4548	1110.95	1106.68	783
chr4	2844572	2846388	Peak_539	11109	.	41.4548	1110.95	1106.68	803
chr7	94536356	94538356	Peak_540	11109	.	41.4548	1110.95	1106.68	521
chr10	115613486	115615935	Peak_541	11080	.	37.368	1108.04	1103.77	1180
chr2	240322536	240324106	Peak_542	11076	.	41.3641	1107.68	1103.41	705
chr2	228189571	228190939	Peak_543	11044	.	41.2734	1104.41	1100.14	583
chr7	48018574	48019545	Peak_544	11027	.	41.228	1102.77	1098.51	539
chr6	155051632	155056331	Peak_545	11021	.	37.6718	1102.19	1097.93	3395
chr1	166808096	166810770	Peak_546	11020	.	39.5078	1102	1097.74	438
chr2	200819709	200821461	Peak_547	10994	.	41.1373	1099.5	1095.24	958
chr4	17811658	17813377	Peak_548	10994	.	37.3221	1099.48	1095.22	499
chr6	26596823	26599015	Peak_549	10986	.	36.9446	1098.7	1094.44	464
chr18	23669706	23671504	Peak_550	10981	.	33.6057	1098.13	1093.87	670
chr5	173042860	173044168	Peak_551	10972	.	34.6916	1097.21	1092.95	667
chr11	67350872	67353032	Peak_552	10929	.	40.9559	1092.97	1088.71	445
chr7	29724009	29725525	Peak_553	10929	.	40.9559	1092.97	1088.71	841
chr12	69863721	69865014	Peak_554	10913	.	40.9105	1091.33	1087.08	533
chr5	133338801	133343855	Peak_555	10913	.	40.9105	1091.33	1087.08	1327
chr16	18800907	18802805	Peak_556	10897	.	40.8651	1089.7	1085.45	506
chr17	1586437	1590873	Peak_557	10897	.	40.8651	1089.7	1085.45	1564
chr11	43701799	43703119	Peak_558	10880	.	40.8198	1088.07	1083.82	670
chr14	105217666	105228516	Peak_559	10880	.	40.8198	1088.07	1083.82	1999
chr11	63438095	63440315	Peak_560	10864	.	40.7744	1086.44	1082.19	1161
chr14	77786394	77788494	Peak_561	10864	.	40.7744	1086.44	1082.19	567
chr14	91975410	91977767	Peak_562	10848	.	40.7291	1084.81	1080.56	1681
chr5	41903798	41905036	Peak_563	10838	.	35.8426	1083.86	1079.62	812
chr1	156697726	156699186	Peak_564	10832	.	36.0864	1083.26	1079.02	708
chr6	146135123	146137282	Peak_565	10829	.	34.9043	1082.98	1078.74	546
chr7	149319939	149323245	Peak_566	10820	.	33.7314	1082.03	1077.78	1666
chr10	15137980	15143104	Peak_567	10815	.	40.6384	1081.55	1077.3	1389
chr22	50762246	50768933	Peak_568	10815	.	40.6384	1081.55	1077.3	3539
chr1	226889426	226891818	Peak_569	10801	.	26.9353	1080.12	1075.87	1835
chr4	2009664	2012494	Peak_570	10782	.	40.5477	1078.29	1074.05	1513
chr5	147763218	147764265	Peak_571	10782	.	40.5477	1078.29	1074.05	510
chr1	229643457	229645382	Peak_572	10760	.	29.2068	1076.07	1071.83	469
chr16	71756780	71758394	Peak_573	10750	.	40.4569	1075.03	1070.79	694
chr10	99205184	99207666	Peak_574	10746	.	36.8382	1074.63	1070.39	893
chr22	24666365	24668764	Peak_575	10737	.	38.6938	1073.71	1069.47	666
chr6	127587649	127589012	Peak_576	10734	.	32.6258	1073.47	1069.23	588
chr14	31925920	31927009	Peak_577	10734	.	40.4116	1073.41	1069.17	525
chr11	2419365	2435068	Peak_578	10717	.	40.3662	1071.78	1067.54	2757
chr8	104310565	104311900	Peak_579	10717	.	40.3662	1071.78	1067.54	853
chr16	3549740	3552945	Peak_580	10701	.	40.3209	1070.15	1065.92	1407
chr22	50215147	50223519	Peak_581	10701	.	40.3209	1070.15	1065.92	5513
chr9	33523199	33525001	Peak_582	10692	.	39.8712	1069.26	1065.02	543
chr2	232825363	232827516	Peak_583	10685	.	40.2755	1068.53	1064.29	1152
chr17	56768209	56770515	Peak_584	10682	.	34.8945	1068.3	1064.06	1659
chr14	75642574	75643828	Peak_585	10669	.	40.2302	1066.9	1062.67	622
chr6	89855361	89856737	Peak_586	10667	.	39.5017	1066.75	1062.52	634
chr7	148785942	148789710	Peak_587	10665	.	35.9105	1066.52	1062.29	2131
chr22	41251962	41253655	Peak_588	10664	.	32.0902	1066.49	1062.26	553
chr17	79808500	79836211	Peak_589	10658	.	37.6125	1065.81	1061.58	21135
chr19	34660287	34664656	Peak_590	10652	.	40.1848	1065.28	1061.05	2857
chr3	10182271	10185650	Peak_591	10652	.	40.1848	1065.28	1061.05	1446
chr8	99305592	99306995	Peak_592	10652	.	40.1848	1065.28	1061.05	777
chr5	168005722	168007164	Peak_593	10646	.	34.214	1064.65	1060.42	564
chr16	70557130	70559771	Peak_594	10636	.	40.1395	1063.65	1059.42	788
chr18	9102191	9103410	Peak_595	10636	.	40.1395	1063.65	1059.42	682
chr6	52440161	52442685	Peak_596	10636	.	40.1395	1063.65	1059.42	2063
chr15	83875275	83877418	Peak_597	10633	.	35.0451	1063.33	1059.1	687
chr13	91999143	92001726	Peak_598	10610	.	24.78	1061.03	1056.8	1711
chr17	61626147	61628851	Peak_599	10603	.	35.9686	1060.38	1056.15	1271
chr11	118660785	118663833	Peak_600	10587	.	40.0034	1058.78	1054.56	626
chr19	10360752	10364364	Peak_601	10587	.	40.0034	1058.78	1054.56	2143
chr20	34329010	34330871	Peak_602	10587	.	40.0034	1058.78	1054.56	944
chr1	161368282	161370175	Peak_603	10579	.	36.7769	1057.95	1053.72	754
chr1	38256585	38266429	Peak_604	10571	.	39.958	1057.16	1052.94	3166
chr4	141294451	141295552	Peak_605	10571	.	39.958	1057.16	1052.94	561
chr21	43298378	43301243	Peak_606	10570	.	36.1787	1057.05	1052.83	1385
chr16	67448484	67451611	Peak_607	10555	.	39.9127	1055.54	1051.32	1737
chr22	46729826	46733067	Peak_608	10555	.	39.9127	1055.54	1051.32	1793
chr9	80850465	80852303	Peak_609	10555	.	39.9127	1055.54	1051.32	686
chr9	90340340	90341891	Peak_610	10539	.	39.8673	1053.92	1049.7	971
chr16	30566172	30571551	Peak_611	10532	.	32.9255	1053.22	1049	3289
chr1	149981568	149983091	Peak_612	10530	.	33.3567	1053.08	1048.86	895
chr10	22517856	22518680	Peak_613	10524	.	37.4364	1052.43	1048.21	394
chr11	120195627	120196723	Peak_614	10522	.	39.822	1052.3	1048.08	592
chr17	79202581	79216389	Peak_615	10522	.	39.822	1052.3	1048.08	10770
chr1	226373640	226375102	Peak_616	10498	.	25.4674	1049.85	1045.63	1017
chr20	2081992	2084791	Peak_617	10490	.	39.7313	1049.06	1044.84	1616
chr5	114879461	114881246	Peak_618	10490	.	39.7313	1049.06	1044.84	722
chr16	89573274	89576708	Peak_619	10474	.	39.6859	1047.44	1043.22	1728
chr2	100937207	100939393	Peak_620	10474	.	39.6859	1047.44	1043.22	808
chr5	177648202	177660910	Peak_621	10474	.	39.6859	1047.44	1043.22	11490
chr7	134000918	134002204	Peak_622	10468	.	33.4797	1046.88	1042.66	578
chr2	238968776	238970652	Peak_623	10458	.	39.6405	1045.82	1041.61	451
chr7	99213674	99215447	Peak_624	10458	.	39.6405	1045.82	1041.61	1029
chr9	140098621	140111476	Peak_625	10458	.	39.6405	1045.82	1041.61	1679
chr14	93648950	93651953	Peak_626	10442	.	39.5952	1044.2	1039.99	2009
chr7	16460030	16461826	Peak_627	10442	.	39.5952	1044.2	1039.99	730
chr22	24948426	24952611	Peak_628	10435	.	31.743	1043.53	1039.32	3290
chr1	100503274	100504720	Peak_629	10433	.	33.466	1043.4	1039.19	756
chr14	73524739	73526195	Peak_630	10425	.	39.5498	1042.58	1038.37	562
chr12	49075188	49076655	Peak_631	10409	.	39.5045	1040.97	1036.76	576
chr19	58872285	58875744	Peak_632	10409	.	39.5045	1040.97	1036.76	1645
chr5	64063711	64065184	Peak_633	10409	.	39.5045	1040.97	1036.76	676
chr9	114392748	114394443	Peak_634	10409	.	39.5045	1040.97	1036.76	1152
chr10	46951206	46952141	Peak_635	10394	.	24.1452	1039.48	1035.28	383
chr1	53191821	53193109	Peak_636	10393	.	39.4591	1039.35	1035.14	531
chr19	2148423	2154194	Peak_637	10393	.	39.4591	1039.35	1035.14	2833
chr21	45076798	45080767	Peak_638	10377	.	36.7085	1037.79	1033.58	2577
chr1	94311164	94313971	Peak_639	10377	.	39.4138	1037.73	1033.53	1727
chr16	572433	588836	Peak_640	10361	.	39.3684	1036.12	1031.91	4695
chr7	150099225	150115246	Peak_641	10355	.	35.8788	1035.58	1031.38	2916
chr5	176448516	176450765	Peak_642	10353	.	36.0616	1035.32	1031.12	1329
chr1	151170651	151172470	Peak_643	10337	.	34.1382	1033.72	1029.52	624
chr16	14723169	14728515	Peak_644	10334	.	38.9794	1033.46	1029.26	772
chr2	136742437	136743878	Peak_645	10333	.	39.2105	1033.4	1029.2	479
chr9	37799874	37801903	Peak_646	10328	.	39.2777	1032.89	1028.69	1285
chr2	233561484	233562974	Peak_647	10312	.	39.2324	1031.27	1027.08	791
chr1	117908799	117910607	Peak_648	10295	.	33.0545	1029.58	1025.38	862
chr16	67225687	67232611	Peak_649	10286	.	35.7672	1028.69	1024.5	530
chr7	134853143	134856048	Peak_650	10280	.	34.7065	1028.04	1023.85	2012
chr1	226108696	226113078	Peak_651	10263	.	25.0865	1026.38	1022.19	2996
chr12	110938619	110940489	Peak_652	10248	.	39.0509	1024.82	1020.63	1065
chr8	11141240	11142865	Peak_653	10248	.	39.0509	1024.82	1020.63	880
chr12	120637839	120639954	Peak_654	10232	.	39.0056	1023.21	1019.02	922
chr12	21809764	21811508	Peak_655	10232	.	39.0056	1023.21	1019.02	720
chr12	69632935	69634386	Peak_656	10232	.	39.0056	1023.21	1019.02	787
chr19	57790942	57792780	Peak_657	10232	.	39.0056	1023.21	1019.02	1031
chr2	37422833	37425433	Peak_658	10232	.	39.0056	1023.21	1019.02	1104
chr2	234474652	234475696	Peak_659	10215	.	38.9602	1021.6	1017.41	536
chr3	126373195	126376104	Peak_660	10215	.	38.9602	1021.6	1017.41	517
chr5	177026226	177040393	Peak_661	10202	.	36.9992	1020.27	1016.09	995
chr17	62961690	62962541	Peak_662	10202	.	33.3724	1020.22	1016.03	407
chr17	21454200	21455145	Peak_663	10199	.	36.2175	1019.98	1015.8	430
chr6	111195124	111197839	Peak_664	10198	.	31.4185	1019.89	1015.71	2234
chr1	32809828	32824032	Peak_665	10188	.	30.2879	1018.81	1014.63	6883
chr10	103815109	103817269	Peak_666	10183	.	38.8695	1018.38	1014.19	798
chr1	145610441	145611628	Peak_667	10183	.	38.8695	1018.38	1014.19	629
chr1	212002618	212004524	Peak_668	10182	.	35.3327	1018.25	1014.07	1203
chr6	138427880	138429607	Peak_669	10180	.	30.783	1018	1013.82	479
chr2	205409506	205411461	Peak_670	10168	.	35.6165	1016.87	1012.68	791
chr4	171010096	171011755	Peak_671	10167	.	38.8242	1016.77	1012.58	1130
chr6	64345244	64346920	Peak_672	10156	.	36.9932	1015.63	1011.45	1014
chr17	47437862	47440366	Peak_673	10153	.	36.2083	1015.34	1011.16	1269
chr17	3626442	3628493	Peak_674	10135	.	38.7334	1013.55	1009.37	541
chr17	40824955	40833983	Peak_675	10135	.	38.7334	1013.55	1009.37	6962
chr5	54602783	54604207	Peak_676	10135	.	38.7334	1013.55	1009.37	573
chr9	127617433	127625621	Peak_677	10135	.	38.7334	1013.55	1009.37	6537
chr1	153628980	153633904	Peak_678	10132	.	37.6537	1013.22	1009.04	2076
chr6	4018237	4019297	Peak_679	10126	.	30.7044	1012.69	1008.51	517
chr1	115052612	115055489	Peak_680	10123	.	32.5445	1012.39	1008.21	811
chr9	128023306	128024880	Peak_681	10119	.	38.6881	1011.94	1007.76	1033
chr9	33815838	33818389	Peak_682	10119	.	38.6881	1011.94	1007.76	1777
chr3	51426775	51431545	Peak_683	10110	.	37.4409	1011.06	1006.88	2139
chr1	229405755	229407605	Peak_684	10089	.	27.1102	1008.96	1004.79	1313
chr18	33551792	33553198	Peak_685	10088	.	24.9824	1008.85	1004.68	998
chr14	69282393	69285347	Peak_686	10087	.	38.5974	1008.73	1004.55	874
chr20	34637986	34639875	Peak_687	10087	.	38.5974	1008.73	1004.55	670
chr7	33101571	33103251	Peak_688	10055	.	38.5067	1005.51	1001.34	1039
chr9	71649222	71652035	Peak_689	10055	.	38.5067	1005.51	1001.34	1623
chr2	20549730	20551664	Peak_690	10043	.	38.0389	1004.38	1000.21	464
chr9	88419667	88421161	Peak_691	10039	.	38.4613	1003.91	999.737	839
chr11	61099624	61107357	Peak_692	10023	.	38.416	1002.3	998.134	772
chr2	96930576	96934490	Peak_693	10006	.	38.3706	1000.7	996.531	1594
chr1	184020329	184021429	Peak_694	9998	.	32.1457	999.868	995.703	649
chr3	132378021	132379901	Peak_695	9990	.	38.3252	999.093	994.929	1164
chr5	179158752	179161019	Peak_696	9982	.	31.4066	998.206	994.043	1334
chr6	146055670	146057155	Peak_697	9981	.	33.7499	998.143	993.98	552
chr7	32767405	32768764	Peak_698	9974	.	38.2799	997.489	993.327	663
chr1	227057759	227060010	Peak_699	9969	.	26.351	996.972	992.811	791
chr5	72731704	72733900	Peak_700	9958	.	38.2345	995.886	991.725	1235
chr11	30344301	30345342	Peak_701	9948	.	36.64	994.819	990.659	485
chr8	145537790	145554341	Peak_702	9942	.	38.1892	994.284	990.124	13024
chr1	92763931	92765298	Peak_703	9932	.	32.9544	993.257	989.099	437
chr19	55983947	55988159	Peak_704	9928	.	37.5788	992.877	988.72	3684
chr2	73459726	73462523	Peak_705	9926	.	38.1438	992.681	988.524	1857
chr7	23338627	23339773	Peak_706	9926	.	38.1438	992.681	988.524	506
chr7	55432978	55434762	Peak_707	9926	.	38.1438	992.681	988.524	957
chr5	107716062	107718556	Peak_708	9910	.	38.0985	991.08	986.924	1039
chr12	57038836	57041016	Peak_709	9908	.	37.3796	990.886	986.731	774
chr3	42844731	42846555	Peak_710	9908	.	33.4039	990.828	986.673	1000
chr1	31537712	31539842	Peak_711	9904	.	28.2598	990.4	986.245	565
chr19	4399106	4401549	Peak_712	9894	.	38.0531	989.479	985.324	1140
chr11	8703351	8705893	Peak_713	9878	.	38.0078	987.878	983.725	1119
chr16	67875299	67877804	Peak_714	9878	.	38.0078	987.878	983.725	1085
chr2	37382937	37385716	Peak_715	9862	.	37.9624	986.278	982.127	972
chr6	8435133	8436531	Peak_716	9861	.	33.8642	986.16	982.01	832
chr1	244815607	244817351	Peak_717	9853	.	25.215	985.312	981.162	1025
chr19	11037700	11041310	Peak_718	9846	.	37.9171	984.678	980.529	1963
chr6	27739895	27741117	Peak_719	9839	.	32.2642	983.919	979.771	579
chr11	109962658	109964956	Peak_720	9830	.	37.8717	983.08	978.932	1747
chr2	239110488	239113428	Peak_721	9830	.	37.8717	983.08	978.932	1502
chr19	49587789	49590247	Peak_722	9798	.	37.781	979.883	975.739	1136
chr7	116502238	116503628	Peak_723	9798	.	37.781	979.883	975.739	669
chr17	73779989	73781931	Peak_724	9797	.	35.6339	979.78	975.637	1389
chr6	100015755	100018021	Peak_725	9782	.	37.7356	978.286	974.143	610
chr22	23487288	23489395	Peak_726	9775	.	36.7338	977.508	973.366	509
chr17	19880450	19882264	Peak_727	9772	.	33.3778	977.3	973.158	410
chr16	30378827	30391432	Peak_728	9769	.	29.688	976.904	972.763	10563
chr17	42216460	42222490	Peak_729	9766	.	37.6903	976.689	972.548	2964
chr3	75834001	75835420	Peak_730	9761	.	33.6612	976.112	971.972	539
chr5	99870776	99871993	Peak_731	9754	.	37.4511	975.494	971.354	542
chr11	92930419	92931484	Peak_732	9750	.	37.6449	975.092	970.953	541
chr3	128597417	128599602	Peak_733	9750	.	37.6449	975.092	970.953	813
chr3	39424093	39427493	Peak_734	9738	.	36.4821	973.815	969.677	1373
chr11	62493562	62496639	Peak_735	9734	.	37.5996	973.497	969.359	830
chr14	74768985	74771381	Peak_736	9734	.	37.5996	973.497	969.359	435
chr16	66582893	66587186	Peak_737	9734	.	37.5996	973.497	969.359	959
chr7	56031568	56035190	Peak_738	9719	.	37.5542	971.901	967.765	1039
chr11	3074579	3079612	Peak_739	9718	.	36.8494	971.813	967.678	4334
chr1	203764429	203765719	Peak_740	9717	.	31.9742	971.735	967.6	468
chr3	156876992	156878903	Peak_741	9713	.	36.2357	971.301	967.167	1168
chr1	151881448	151882602	Peak_742	9709	.	29.5581	970.959	966.825	356
chr1	236958157	236959473	Peak_743	9703	.	26.97	970.313	966.179	659
chr11	65818228	65821645	Peak_744	9703	.	37.5089	970.306	966.172	1832
chr16	25268127	25270218	Peak_745	9703	.	37.5089	970.306	966.172	834
chr16	9183824	9187309	Peak_746	9703	.	37.5089	970.306	966.172	1999
chr9	129566391	129568575	Peak_747	9687	.	36.8867	968.754	964.622	1027
chr3	149374178	149377410	Peak_748	9687	.	37.4635	968.712	964.58	2032
chr1	179050409	179052898	Peak_749	9676	.	37.3563	967.663	963.532	905
chr20	32950199	32952219	Peak_750	9671	.	37.4181	967.118	962.987	1223
chr2	148777580	148778577	Peak_751	9671	.	37.4181	967.118	962.987	494
chr3	49964771	49968184	Peak_752	9662	.	34.1669	966.229	962.1	2470
chr2	135674667	135677311	Peak_753	9639	.	37.3274	963.932	959.805	1979
chr1	224620941	224623361	Peak_754	9632	.	23.6093	963.263	959.137	945
chr14	39642829	39645324	Peak_755	9623	.	37.2821	962.34	958.214	1756
chr1	213188248	213190218	Peak_756	9620	.	32.6273	962.054	957.929	376
chr11	107991727	107993128	Peak_757	9607	.	37.2367	960.748	956.624	808
chr15	75870096	75873367	Peak_758	9607	.	37.2367	960.748	956.624	955
chr16	46722214	46724520	Peak_759	9591	.	37.1914	959.157	955.034	1520
chr3	50362682	50382146	Peak_760	9591	.	37.1914	959.157	955.034	12616
chr11	105947262	105949159	Peak_761	9575	.	37.146	957.566	953.445	1430
chr2	97522646	97525641	Peak_762	9575	.	37.146	957.566	953.445	949
chr15	65578183	65580526	Peak_763	9563	.	33.7779	956.396	952.276	703
chr4	2964350	2966373	Peak_764	9559	.	37.1007	955.976	951.857	638
chr7	105161728	105164783	Peak_765	9559	.	37.1007	955.976	951.857	740
chr11	66382188	66385375	Peak_766	9555	.	33.1109	955.552	951.433	1508
chr10	71991994	71993763	Peak_767	9553	.	34.604	955.363	951.245	950
chr21	34142961	34144674	Peak_768	9551	.	31.4927	955.111	950.993	912
chr10	70747811	70749769	Peak_769	9544	.	33.4072	954.485	950.367	885
chr9	100458811	100460018	Peak_770	9540	.	35.879	954.045	949.928	595
chr15	40225632	40227196	Peak_771	9527	.	37.0099	952.798	948.681	936
chr22	29166918	29169622	Peak_772	9527	.	37.0099	952.798	948.681	1898
chr15	90806805	90810505	Peak_773	9527	.	34.8849	952.752	948.636	2265
chr1	157014938	157016704	Peak_774	9526	.	32.9518	952.649	948.533	485
chr2	71122865	71134970	Peak_775	9522	.	33.8068	952.285	948.17	5734
chr10	97889204	97890674	Peak_776	9520	.	35.7951	952.058	947.943	485
chr16	89283494	89285092	Peak_777	9512	.	36.9646	951.209	947.094	427
chr9	139326436	139334922	Peak_778	9512	.	36.9646	951.209	947.094	7636
chr16	74330239	74331747	Peak_779	9507	.	33.7668	950.739	946.625	592
chrX	107068830	107070832	Peak_780	9501	.	28.261	950.158	946.045	1113
chr7	23220649	23223250	Peak_781	9496	.	36.2308	949.655	945.542	1230
chr18	67955529	67957427	Peak_782	9496	.	36.9192	949.621	945.508	1211
chr19	54616702	54622163	Peak_783	9496	.	36.9192	949.621	945.508	2201
chr1	59368896	59370214	Peak_784	9495	.	28.0725	949.59	945.478	792
chr17	39991524	39995677	Peak_785	9490	.	30.9967	949.068	944.956	732
chr1	202111018	202118503	Peak_786	9480	.	36.8739	948.034	943.922	2552
chr12	6954223	6962751	Peak_787	9480	.	36.8739	948.034	943.922	7345
chr10	75011082	75012928	Peak_788	9478	.	32.9172	947.871	943.761	1210
chr3	142296965	142298197	Peak_789	9464	.	36.8285	946.447	942.337	531
chrX	53448709	53450486	Peak_790	9464	.	36.8285	946.447	942.337	769
chr21	33103098	33106094	Peak_791	9449	.	32.093	944.939	940.831	1058
chr10	123686690	123690206	Peak_792	9432	.	36.7378	943.275	939.168	789
chr14	105764596	105768332	Peak_793	9432	.	36.7378	943.275	939.168	2550
chr14	24896080	24902353	Peak_794	9432	.	36.7378	943.275	939.168	3132
chr16	19124036	19127477	Peak_795	9432	.	36.7378	943.275	939.168	1422
chr17	76208805	76211569	Peak_796	9432	.	36.7378	943.275	939.168	1719
chr17	8338750	8340063	Peak_797	9432	.	36.7378	943.275	939.168	707
chr17	16556378	16557416	Peak_798	9431	.	34.9273	943.108	939.003	520
chr6	170863054	170864088	Peak_799	9426	.	31.1744	942.657	938.552	558
chr4	73934670	73935899	Peak_800	9423	.	35.731	942.357	938.252	493
chr10	120863495	120867266	Peak_801	9416	.	36.6925	941.689	937.585	340
chr17	29232634	29234793	Peak_802	9416	.	36.6925	941.689	937.585	740
chr19	19428846	19433541	Peak_803	9416	.	36.6925	941.689	937.585	2926
chr10	43276043	43278897	Peak_804	9401	.	36.6471	940.104	936.002	1977
chr11	35683737	35685423	Peak_805	9401	.	36.6471	940.104	936.002	880
chr2	191398554	191400050	Peak_806	9401	.	36.6471	940.104	936.002	1030
chr17	64187138	64188738	Peak_807	9386	.	33.9778	938.626	934.525	720
chr2	128050744	128052700	Peak_808	9385	.	36.6018	938.52	934.419	811
chr8	98655695	98658078	Peak_809	9385	.	36.6018	938.52	934.419	1027
chr6	159419510	159421570	Peak_810	9370	.	34.1463	937.1	933.001	1573
chr2	152265611	152267361	Peak_811	9369	.	36.5564	936.937	932.838	1104
chr7	2392089	2395545	Peak_812	9369	.	36.5564	936.937	932.838	2614
chr5	176845477	176866517	Peak_813	9365	.	35.0563	936.592	932.494	8382
chr1	62207584	62209297	Peak_814	9361	.	29.6291	936.136	932.038	1063
chr17	17581733	17587570	Peak_815	9353	.	36.511	935.354	931.256	3255
chr17	26219691	26220637	Peak_816	9353	.	36.511	935.354	931.256	449
chr22	31364195	31366290	Peak_817	9340	.	30.9068	934.057	929.961	1315
chr17	43137058	43139078	Peak_818	9340	.	35.355	934.029	929.933	1128
chr6	39082199	39083445	Peak_819	9336	.	35.9907	933.638	929.544	577
chr15	72667405	72668947	Peak_820	9292	.	31.7737	929.299	925.208	812
chr10	62537893	62539102	Peak_821	9292	.	32.5248	929.216	925.126	557
chr16	57278528	57279900	Peak_822	9290	.	36.3296	929.026	924.936	696
chr5	134209346	134212066	Peak_823	9290	.	36.3296	929.026	924.936	937
chr14	45602972	45603952	Peak_824	9281	.	33.625	928.179	924.09	411
chr1	212605881	212607964	Peak_825	9275	.	27.4501	927.518	923.429	493
chr19	40029949	40031099	Peak_826	9274	.	36.2843	927.446	923.358	632
chr5	175787519	175789692	Peak_827	9274	.	36.2843	927.446	923.358	1084
chr6	126110732	126112742	Peak_828	9271	.	31.2204	927.103	923.015	932
chr3	42622861	42624171	Peak_829	9264	.	31.0784	926.485	922.397	479
chr3	9437756	9440555	Peak_830	9261	.	31.8732	926.124	922.037	1926
chr3	52311399	52313621	Peak_831	9260	.	32.7283	926.037	921.95	933
chr8	87526162	87527505	Peak_832	9258	.	36.2389	925.866	921.78	840
chr17	30667341	30669941	Peak_833	9242	.	36.1936	924.287	920.202	1852
chr17	36980625	36982563	Peak_834	9242	.	36.1936	924.287	920.202	1156
chr3	125238176	125239603	Peak_835	9242	.	36.1936	924.287	920.202	608
chr3	128203609	128213889	Peak_836	9242	.	36.1936	924.287	920.202	4750
chr3	37216982	37218743	Peak_837	9240	.	26.4361	924.008	919.925	633
chr4	103420853	103423714	Peak_838	9235	.	35.324	923.58	919.496	1964
chr1	153929979	153933766	Peak_839	9230	.	25.2606	923.011	918.927	999
chr17	78414691	78429409	Peak_840	9228	.	34.7042	922.879	918.795	13735
chr16	3450424	3452489	Peak_841	9227	.	36.1482	922.708	918.625	992
chr8	41908264	41910875	Peak_842	9227	.	36.1482	922.708	918.625	1156
chr2	203735444	203737726	Peak_843	9213	.	34.5554	921.343	917.261	691
chr20	52824145	52825551	Peak_844	9211	.	36.1028	921.13	917.048	696
chr4	77068784	77070198	Peak_845	9211	.	36.1028	921.13	917.048	608
chr3	49376893	49378937	Peak_846	9204	.	35.2362	920.445	916.365	839
chr1	150550847	150553308	Peak_847	9203	.	32.5102	920.324	916.244	1065
chr10	105035510	105038650	Peak_848	9197	.	34.4024	919.758	915.678	1685
chr15	75492408	75510031	Peak_849	9195	.	36.0575	919.552	915.472	2057
chr16	30455594	30457788	Peak_850	9192	.	25.5935	919.289	915.21	1291
chr6	170861744	170862674	Peak_851	9188	.	31.34	918.841	914.763	400
chr12	684074	686204	Peak_852	9179	.	36.0121	917.975	913.897	1290
chr3	120067093	120068823	Peak_853	9179	.	36.0121	917.975	913.897	807
chr1	156710175	156711597	Peak_854	9166	.	31.2419	916.616	912.539	630
chr5	131745871	131748351	Peak_855	9155	.	35.5387	915.581	911.506	711
chr5	178322306	178323713	Peak_856	9153	.	35.7406	915.314	911.239	731
chr8	144658464	144684218	Peak_857	9148	.	35.9214	914.822	910.748	21877
chr8	61428824	61430394	Peak_858	9148	.	35.9214	914.822	910.748	1126
chr22	39100867	39102930	Peak_859	9146	.	32.2936	914.628	910.555	1299
chr10	81837630	81839631	Peak_860	9132	.	35.8761	913.246	909.174	985
chr7	74488403	74490297	Peak_861	9116	.	35.8307	911.671	907.601	982
chr10	104401605	104415331	Peak_862	9102	.	35.6861	910.257	906.188	2998
chr1	47133091	47135163	Peak_863	9100	.	35.7854	910.097	906.028	764
chr7	102789257	102790484	Peak_864	9100	.	35.7854	910.097	906.028	757
chr12	2921524	2922657	Peak_865	9088	.	34.3186	908.864	904.796	446
chr2	131850268	131852183	Peak_866	9085	.	35.74	908.523	904.456	537
chr6	153303179	153305887	Peak_867	9073	.	31.1823	907.327	903.261	1758
chr16	2018154	2037630	Peak_868	9069	.	35.6946	906.95	902.884	16270
chr16	2316802	2324676	Peak_869	9069	.	35.6946	906.95	902.884	1058
chr9	128002794	128004624	Peak_870	9069	.	35.6946	906.95	902.884	675
chr3	14165028	14168181	Peak_871	9067	.	35.5539	906.702	902.637	1106
chr19	14625931	14631698	Peak_873	9038	.	35.6039	903.805	899.742	3054
chr2	136498832	136500370	Peak_874	9030	.	33.4441	903.061	899	870
chr1	1207568	1212221	Peak_875	9022	.	35.5586	902.233	898.172	1489
chr13	115000017	115001079	Peak_876	9022	.	35.5586	902.233	898.172	564
chr4	2243010	2244183	Peak_877	9006	.	35.5132	900.662	896.603	617
chr6	38669665	38671223	Peak_878	9006	.	35.5132	900.662	896.603	1028
chr17	40020652	40022082	Peak_879	8995	.	32.212	899.58	895.522	745
chr22	31734077	31745266	Peak_880	8994	.	34.8169	899.402	895.345	9255
chr15	90292125	90296266	Peak_881	8990	.	35.4679	899.091	895.034	2210
chr1	161719195	161720749	Peak_882	8981	.	31.1295	898.129	894.074	634
chr10	121484581	121486740	Peak_883	8975	.	35.4225	897.521	893.466	523
chr5	56246448	56248669	Peak_884	8975	.	35.4225	897.521	893.466	1222
chr5	98263509	98265672	Peak_885	8975	.	35.4225	897.521	893.466	1621
chr15	85196067	85202498	Peak_886	8959	.	31.6005	895.985	891.932	1283
chr14	75347638	75349960	Peak_887	8959	.	35.3772	895.952	891.899	1178
chr16	2253484	2268665	Peak_888	8959	.	35.3772	895.952	891.899	2039
chr16	75681065	75683320	Peak_889	8959	.	35.3772	895.952	891.899	916
chr8	97273262	97275340	Peak_890	8959	.	35.3772	895.952	891.899	442
chr3	52187323	52189477	Peak_891	8949	.	35.2759	894.963	890.91	847
chr11	6623178	6625879	Peak_892	8943	.	35.3318	894.383	890.331	1526
chr14	74249103	74254700	Peak_893	8943	.	35.3318	894.383	890.331	4683
chr14	92505619	92506938	Peak_894	8943	.	35.3318	894.383	890.331	619
chr12	44229167	44230524	Peak_895	8941	.	33.8628	894.169	890.117	542
chr6	3258532	3260253	Peak_896	8931	.	34.6402	893.16	889.109	926
chr16	70321280	70323669	Peak_897	8928	.	35.2864	892.815	888.764	1987
chr3	160282104	160284147	Peak_898	8928	.	35.2864	892.815	888.764	710
chr9	33076047	33078534	Peak_899	8903	.	34.6915	890.318	886.271	510
chr11	110166283	110167996	Peak_900	8896	.	35.1957	889.68	885.633	776
chr13	51483053	51485152	Peak_901	8896	.	35.1957	889.68	885.633	1064
chr7	138664444	138667457	Peak_902	8896	.	27.9787	889.674	885.628	2128
chr13	79232532	79233511	Peak_903	8889	.	22.006	888.975	884.929	426
chr1	24069266	24071520	Peak_904	8881	.	35.1504	888.113	884.068	849
chr20	45984630	45991835	Peak_905	8881	.	35.1504	888.113	884.068	1823
chr3	4507782	4509876	Peak_906	8880	.	34.4679	888.087	884.042	977
chr3	40565758	40567420	Peak_907	8874	.	32.4963	887.443	883.399	814
chr1	228266352	228272055	Peak_908	8867	.	23.0452	886.714	882.67	4189
chr7	39988570	39991814	Peak_909	8865	.	35.105	886.547	882.503	1108
chr1	204484343	204487502	Peak_910	8838	.	28.7313	883.9	879.859	1291
chr2	3381074	3384234	Peak_911	8834	.	35.0143	883.417	879.376	2556
chr5	87969853	87972047	Peak_912	8834	.	35.0143	883.417	879.376	974
chrX	57618183	57619851	Peak_913	8834	.	35.0143	883.417	879.376	665
chr1	153948500	153950655	Peak_914	8821	.	33.3461	882.193	878.154	1327
chr1	28695805	28697558	Peak_915	8810	.	31.1383	881.064	877.027	621
chr17	49336480	49338884	Peak_916	8806	.	34.0613	880.662	876.625	1723
chr10	103824566	103827681	Peak_917	8806	.	33.5153	880.635	876.597	825
chr10	105108755	105112985	Peak_918	8795	.	34.3964	879.567	875.531	1737
chr17	74067902	74069380	Peak_919	8791	.	33.157	879.125	875.09	561
chr12	108154045	108155738	Peak_920	8787	.	34.8782	878.725	874.69	752
chr8	42994899	42997121	Peak_921	8787	.	34.8782	878.725	874.69	1035
chr1	178994172	178996086	Peak_922	8786	.	29.5755	878.677	874.642	1405
chr3	47822554	47824561	Peak_923	8783	.	27.5118	878.356	874.322	1141
chr3	12524414	12526750	Peak_924	8780	.	31.4443	878.06	874.025	1706
chr11	9481505	9483384	Peak_925	8771	.	34.8329	877.162	873.129	1351
chr20	34541211	34543178	Peak_926	8771	.	34.8329	877.162	873.129	751
chr9	25677189	25678841	Peak_927	8771	.	34.8329	877.162	873.129	608
chr17	43024035	43025929	Peak_928	8756	.	34.7875	875.6	871.568	844
chr2	62732442	62733769	Peak_929	8756	.	34.7875	875.6	871.568	634
chr10	60144576	60145953	Peak_930	8752	.	29.5507	875.223	871.192	871
chr22	38079707	38083961	Peak_931	8751	.	30.258	875.187	871.156	2714
chr1	65210032	65211834	Peak_932	8745	.	26.488	874.514	870.484	845
chr10	70165969	70168487	Peak_933	8740	.	34.7422	874.039	870.008	900
chr19	10215420	10219555	Peak_934	8740	.	34.7422	874.039	870.008	1774
chr2	171784845	171787035	Peak_935	8740	.	34.7422	874.039	870.008	1118
chr18	72263632	72266141	Peak_936	8724	.	34.6968	872.478	868.449	983
chr6	42857959	42860108	Peak_937	8724	.	34.6968	872.478	868.449	391
chr5	16464919	16467184	Peak_938	8709	.	34.6515	870.917	866.89	1282
chr12	132194811	132196826	Peak_939	8702	.	34.1298	870.238	866.212	956
chr7	105751948	105754418	Peak_940	8698	.	33.1107	869.853	865.827	566
chr7	107383338	107385248	Peak_941	8694	.	33.7163	869.424	865.399	1410
chr1	23345512	23347020	Peak_942	8693	.	34.6061	869.357	865.332	776
chr17	6539495	6544972	Peak_943	8693	.	34.6061	869.357	865.332	4549
chr3	48227666	48232891	Peak_944	8685	.	34.0697	868.53	864.506	2646
chr1	78224667	78225911	Peak_945	8684	.	25.4343	868.411	864.387	621
chr9	19229677	19231490	Peak_946	8682	.	32.1312	868.274	864.25	1274
chr1	28906355	28909618	Peak_947	8680	.	28.7139	868.096	864.072	1832
chrX	54383682	54386003	Peak_948	8677	.	34.5608	867.798	863.774	1468
chr1	228326423	228345602	Peak_949	8663	.	23.3057	866.397	862.375	1713
chr1	42920617	42923717	Peak_950	8662	.	34.5154	866.239	862.217	1831
chr9	140316754	140319789	Peak_951	8662	.	34.5154	866.239	862.217	742
chr3	13459600	13463189	Peak_952	8643	.	31.1794	864.356	860.336	1958
chr3	128444636	128445943	Peak_953	8631	.	34.4247	863.123	859.105	603
chr5	81573501	81575204	Peak_954	8631	.	34.4247	863.123	859.105	483
chr3	15139996	15142353	Peak_955	8630	.	32.6628	863.007	858.989	567
chr11	125438874	125440044	Peak_956	8615	.	34.3793	861.567	857.55	592
chr19	13066224	13068619	Peak_957	8615	.	34.3793	861.567	857.55	1521
chr4	6717509	6719016	Peak_958	8615	.	34.3793	861.567	857.55	699
chr12	50794377	50795532	Peak_959	8600	.	34.334	860.01	855.995	609
chr15	49170027	49170957	Peak_960	8600	.	34.334	860.01	855.995	483
chr5	114961011	114962226	Peak_961	8600	.	34.334	860.01	855.995	498
chr6	157097897	157101497	Peak_962	8594	.	31.4199	859.484	855.47	693
chr19	5976349	5979404	Peak_963	8584	.	34.2886	858.454	854.441	1500
chr7	143598342	143599621	Peak_964	8583	.	27.6214	858.338	854.326	785
chr22	22220280	22223097	Peak_965	8581	.	32.2029	858.173	854.161	1346
chr12	118572801	118576073	Peak_966	8568	.	34.2433	856.899	852.887	1294
chr13	28711834	28713805	Peak_967	8568	.	34.2433	856.899	852.887	1395
chr14	52455706	52457034	Peak_968	8568	.	34.2433	856.899	852.887	791
chr4	2469469	2472037	Peak_969	8568	.	34.2433	856.899	852.887	1585
chr16	30417494	30423542	Peak_970	8564	.	29.0358	856.429	852.419	1507
chr9	66454701	66458809	Peak_971	8554	.	18.6862	855.472	851.462	3719
chr16	28853846	28861319	Peak_972	8553	.	34.1979	855.344	851.334	4128
chr4	1855774	1862095	Peak_973	8553	.	34.1979	855.344	851.334	1966
chr5	137672978	137675233	Peak_974	8553	.	34.1979	855.344	851.334	426
chr15	23207685	23209026	Peak_975	8537	.	34.1526	853.79	849.782	747
chr16	56458268	56459945	Peak_976	8522	.	34.1072	852.236	848.23	788
chr2	223161386	223167754	Peak_977	8522	.	34.1072	852.236	848.23	1854
chr6	116989293	116990222	Peak_978	8514	.	28.5466	851.496	847.491	428
chr17	19769463	19774875	Peak_979	8512	.	33.895	851.27	847.265	1519
chr11	33278438	33280522	Peak_980	8506	.	34.0618	850.683	846.679	689
chr14	57856268	57858579	Peak_981	8506	.	34.0618	850.683	846.679	1412
chr17	73886366	73901676	Peak_982	8506	.	34.0618	850.683	846.679	6517
chr17	79664768	79672135	Peak_983	8506	.	34.0618	850.683	846.679	5825
chr2	114513481	114515231	Peak_984	8506	.	34.0618	850.683	846.679	479
chr4	156297326	156298395	Peak_985	8506	.	34.0618	850.683	846.679	441
chr7	150740896	150782100	Peak_986	8504	.	32.0926	850.491	846.488	36900
chr16	31518806	31520367	Peak_987	8491	.	34.0165	849.131	845.128	1103
chr19	36023602	36043414	Peak_988	8491	.	34.0165	849.131	845.128	13007
chr7	72349107	72351060	Peak_989	8491	.	34.0165	849.131	845.128	1051
chr9	136241949	136243921	Peak_990	8491	.	34.0165	849.131	845.128	834
chr1	85085983	85088034	Peak_991	8477	.	30.3613	847.713	843.712	493
chr18	158069	159311	Peak_992	8475	.	33.9711	847.579	843.578	656
chr20	277681	280752	Peak_993	8475	.	33.9711	847.579	843.578	801
chr7	32981432	32983136	Peak_994	8475	.	33.9711	847.579	843.578	1062
chr12	12964438	12966899	Peak_995	8474	.	32.96	847.454	843.454	2021
chr10	131932905	131936730	Peak_996	8455	.	32.562	845.579	841.581	2005
chr10	112063916	112065185	Peak_997	8445	.	28.3171	844.528	840.531	514
chr11	74459023	74460966	Peak_998	8444	.	33.8804	844.477	840.479	1396
chr10	70479951	70481750	Peak_999	8429	.	33.8351	842.927	838.931	1254
chr17	43127108	43129103	Peak_1000	8413	.	33.7897	841.377	837.383	1667
chr4	3527290	3536124	Peak_1001	8413	.	33.7897	841.377	837.383	6668
chr15	85173169	85177765	Peak_1002	8408	.	33.0679	840.86	836.867	3720
chr2	204102941	204104871	Peak_1003	8398	.	33.7444	839.828	835.836	861
chr14	50862744	50864685	Peak_1004	8388	.	33.6478	838.886	834.895	954
chr13	41495347	41496508	Peak_1005	8382	.	33.699	838.28	834.29	735
chr7	156929709	156932754	Peak_1006	8375	.	28.1669	837.514	833.525	1501
chr5	169010489	169011352	Peak_1007	8369	.	29.4187	836.907	832.919	482
chr2	242625611	242627397	Peak_1008	8367	.	33.6536	836.732	832.744	975
chr14	89290548	89291593	Peak_1009	8351	.	33.6083	835.185	831.198	631
chr8	99837242	99837991	Peak_1010	8351	.	33.6083	835.185	831.198	425
chr1	32686330	32690060	Peak_1011	8349	.	25.5844	834.939	830.953	1730
chr10	105417307	105422016	Peak_1012	8336	.	33.5629	833.638	829.653	3932
chr11	122931921	122934446	Peak_1013	8336	.	33.5629	833.638	829.653	709
chr2	128144637	128146485	Peak_1014	8330	.	33.5064	833.087	829.103	659
chr2	157291767	157293544	Peak_1015	8320	.	33.5176	832.092	828.109	798
chr5	170288441	170289909	Peak_1016	8317	.	31.7501	831.731	827.748	752
chr3	107149688	107151163	Peak_1017	8310	.	28.2314	831.086	827.104	893
chr17	48553344	48557676	Peak_1018	8308	.	32.835	830.853	826.871	2740
chr3	129611390	129613115	Peak_1019	8305	.	33.4722	830.547	826.565	758
chr1	32409603	32411036	Peak_1020	8302	.	25.8222	830.294	826.313	767
chr7	64838063	64839405	Peak_1021	8290	.	33.4269	829.002	825.022	850
chr6	139308220	139310112	Peak_1022	8282	.	30.2334	828.236	824.257	539
chr7	148724866	148726343	Peak_1023	8281	.	27.5	828.177	824.198	634
chr14	35008327	35009803	Peak_1024	8274	.	33.3815	827.458	823.479	470
chr13	96328502	96330225	Peak_1025	8268	.	32.2191	826.817	822.84	1104
chr19	29702777	29704460	Peak_1026	8259	.	33.3362	825.914	821.937	1060
chr20	47537322	47539035	Peak_1027	8259	.	33.3362	825.914	821.937	1122
chr9	74978735	74981119	Peak_1028	8259	.	33.3362	825.914	821.937	585
chr1	193026902	193029514	Peak_1029	8249	.	27.4064	824.958	820.982	2154
chr10	25010143	25014188	Peak_1030	8243	.	33.2908	824.371	820.396	1966
chr11	65541818	65550747	Peak_1031	8243	.	33.2908	824.371	820.396	5932
chr12	46383377	46386043	Peak_1032	8243	.	33.2908	824.371	820.396	699
chr13	113862209	113864707	Peak_1033	8228	.	33.2454	822.828	818.855	956
chr3	47515383	47521284	Peak_1034	8226	.	31.9193	822.663	818.69	1763
chr1	28283281	28295111	Peak_1035	8226	.	25.7711	822.635	818.662	3259
chr1	36106170	36107814	Peak_1036	8222	.	29.703	822.298	818.325	830
chr10	103113169	103114746	Peak_1037	8222	.	28.1819	822.233	818.26	861
chr1	40348613	40351131	Peak_1038	8212	.	33.2001	821.286	817.314	405
chr17	5093968	5095893	Peak_1039	8212	.	33.2001	821.286	817.314	1032
chr9	104248145	104250024	Peak_1040	8212	.	33.2001	821.286	817.314	957
chr5	49735970	49737611	Peak_1041	8197	.	33.1547	819.745	815.775	1095
chr8	64080338	64081885	Peak_1042	8197	.	33.1547	819.745	815.775	471
chr9	140472224	140491280	Peak_1043	8197	.	33.1547	819.745	815.775	993
chr10	99471436	99476350	Peak_1044	8194	.	32.2435	819.453	815.484	2303
chr3	38177218	38183798	Peak_1045	8193	.	31.8032	819.305	815.335	1163
chr7	151215042	151217016	Peak_1046	8182	.	27.9365	818.224	814.255	1469
chr13	45562923	45564505	Peak_1047	8182	.	33.1094	818.204	814.236	963
chr17	17491569	17497918	Peak_1048	8182	.	33.1094	818.204	814.236	3400
chr19	4049366	4067936	Peak_1049	8182	.	33.1094	818.204	814.236	16302
chr2	179314888	179317139	Peak_1050	8182	.	33.1094	818.204	814.236	797
chr2	20250499	20252155	Peak_1051	8182	.	33.1094	818.204	814.236	1150
chr6	42531401	42532655	Peak_1052	8182	.	33.1094	818.204	814.236	585
chr6	159064434	159066343	Peak_1053	8177	.	27.817	817.79	813.822	1085
chr7	36428456	36430349	Peak_1054	8166	.	33.064	816.664	812.697	1439
chr8	144713794	144719619	Peak_1055	8166	.	33.064	816.664	812.697	4645
chr18	21851140	21852417	Peak_1056	8165	.	30.5283	816.594	812.628	723
chr8	67836428	67839342	Peak_1057	8164	.	32.054	816.45	812.484	1165
chr6	17600024	17601673	Peak_1058	8158	.	31.7811	815.834	811.868	849
chr10	71904116	71906957	Peak_1059	8151	.	33.0187	815.125	811.159	1673
chr1	23669883	23671558	Peak_1060	8151	.	33.0187	815.125	811.159	577
chr16	2269838	2275415	Peak_1061	8151	.	33.0187	815.125	811.159	3915
chr1	33814284	33816393	Peak_1062	8150	.	25.8703	815.028	811.064	876
chr1	65430939	65432727	Peak_1063	8149	.	25.2811	814.901	810.937	1054
chr9	19379616	19380975	Peak_1064	8148	.	26.0826	814.878	810.914	811
chr15	78441281	78442808	Peak_1065	8148	.	32.1126	814.871	810.907	693
chr15	83734721	83736984	Peak_1066	8140	.	29.6227	814.027	810.063	1084
chr1	19922870	19924339	Peak_1067	8135	.	32.9733	813.586	809.622	865
chr5	178286579	178287846	Peak_1068	8135	.	32.9733	813.586	809.622	689
chr9	127702695	127704755	Peak_1069	8135	.	32.9733	813.586	809.622	846
chr10	85898229	85900122	Peak_1070	8130	.	30.007	813.026	809.063	1257
chr22	30818073	30830694	Peak_1071	8121	.	28.8125	812.103	808.141	1853
chr4	69214953	69216595	Peak_1072	8120	.	32.928	812.047	808.086	708
chrX	102883500	102885295	Peak_1073	8107	.	22.0472	810.772	806.812	978
chr20	56882519	56885419	Peak_1075	8105	.	32.8826	810.51	806.55	2433
chr2	232328245	232331296	Peak_1076	8105	.	32.8826	810.51	806.55	760
chr2	74405219	74406580	Peak_1077	8105	.	32.8826	810.51	806.55	546
chr5	132201342	132203081	Peak_1078	8105	.	32.8826	810.51	806.55	1193
chr7	134142385	134144341	Peak_1079	8104	.	29.6778	810.434	806.475	1388
chr11	113184839	113186198	Peak_1080	8089	.	32.8372	808.973	805.014	742
chr17	77809647	77819847	Peak_1081	8089	.	32.8372	808.973	805.014	8343
chr6	167411020	167413627	Peak_1082	8088	.	28.3601	808.878	804.921	2128
chr1	210500803	210503486	Peak_1083	8077	.	32.3828	807.785	803.829	1369
chr17	684810	686957	Peak_1084	8077	.	32.4891	807.746	803.79	544
chr3	28389695	28391115	Peak_1085	8075	.	29.5177	807.595	803.639	716
chr12	27863306	27864556	Peak_1086	8074	.	31.4909	807.459	803.502	616
chr5	108063006	108064549	Peak_1087	8074	.	32.7919	807.436	803.48	962
chr5	118323649	118324632	Peak_1088	8074	.	32.7919	807.436	803.48	446
chr17	74732168	74734549	Peak_1089	8071	.	29.7644	807.182	803.226	1089
chr16	30582133	30584924	Peak_1090	8071	.	24.5208	807.117	803.162	786
chr15	69705802	69707525	Peak_1091	8062	.	27.3763	806.237	802.282	1112
chr22	18108656	18112049	Peak_1092	8059	.	28.0233	805.906	801.952	2682
chr12	11323527	11324492	Peak_1093	8059	.	32.7465	805.9	801.945	471
chr15	49447032	49448180	Peak_1094	8059	.	32.7465	805.9	801.945	460
chr21	34696396	34698017	Peak_1095	8059	.	32.7465	805.9	801.945	510
chr7	5084068	5086585	Peak_1096	8059	.	32.7465	805.9	801.945	1648
chr1	16938500	16940696	Peak_1097	8054	.	15.0186	805.491	801.537	1838
chr1	101490688	101491977	Peak_1098	8054	.	26.4302	805.416	801.462	652
chr15	74987655	74989073	Peak_1099	8043	.	28.7749	804.388	800.435	571
chr12	76477448	76479264	Peak_1100	8043	.	32.7012	804.365	800.412	729
chr19	40502278	40503980	Peak_1101	8043	.	32.7012	804.365	800.412	808
chr10	5854453	5856357	Peak_1102	8042	.	30.7737	804.287	800.335	1307
chr11	32604545	32606290	Peak_1103	8028	.	32.6558	802.83	798.879	905
chr1	27247629	27249134	Peak_1104	8028	.	32.6558	802.83	798.879	766
chr14	21851386	21853005	Peak_1105	8027	.	32.4235	802.74	798.79	701
chr21	38443991	38446813	Peak_1106	8021	.	29.7816	802.101	798.151	1145
chr22	19153497	19176814	Peak_1107	8014	.	28.5181	801.416	797.467	5887
chr11	63929655	63934635	Peak_1108	7997	.	32.5651	799.762	795.815	4145
chr17	80052830	80067735	Peak_1109	7997	.	32.5651	799.762	795.815	3031
chr20	37074771	37076494	Peak_1110	7997	.	32.5651	799.762	795.815	652
chr22	50611407	50641109	Peak_1111	7982	.	32.5198	798.229	794.284	28358
chr6	34759129	34761341	Peak_1112	7982	.	32.5198	798.229	794.284	932
chr9	127176984	127179316	Peak_1113	7982	.	32.5198	798.229	794.284	578
chr15	72564148	72565698	Peak_1114	7979	.	28.6705	797.991	794.047	644
chr17	1009445	1015986	Peak_1115	7966	.	32.4744	796.697	792.753	3300
chr7	6768525	6770399	Peak_1116	7966	.	32.4744	796.697	792.753	1137
chr19	2784166	2787369	Peak_1117	7951	.	32.4291	795.165	791.223	1553
chr19	47615142	47617275	Peak_1118	7951	.	32.4291	795.165	791.223	908
chr9	20683597	20685045	Peak_1119	7949	.	25.8556	794.929	790.988	911
chr21	44526876	44528961	Peak_1120	7940	.	27.0452	794.016	790.076	581
chr10	12170009	12172490	Peak_1121	7936	.	32.3837	793.634	789.694	1841
chr3	38387316	38389924	Peak_1122	7936	.	32.3837	793.634	789.694	1200
chr14	105280904	105284196	Peak_1123	7921	.	32.3383	792.104	788.165	1312
chr16	74698289	74701044	Peak_1124	7921	.	32.3383	792.104	788.165	2289
chr10	101379383	101382144	Peak_1125	7920	.	28.5186	792.098	788.16	1548
chr1	114353949	114356254	Peak_1126	7914	.	27.3349	791.47	787.533	670
chr11	77348202	77351036	Peak_1127	7905	.	32.293	790.574	786.637	505
chr19	12905466	12913845	Peak_1128	7890	.	32.2476	789.044	785.11	7042
chr22	19417874	19420940	Peak_1129	7886	.	29.9071	788.693	784.76	1636
chr3	14219408	14220736	Peak_1130	7886	.	28.8525	788.626	784.693	523
chr5	74806484	74808265	Peak_1131	7885	.	31.0081	788.542	784.608	1403
chr11	75109904	75111251	Peak_1132	7883	.	27.5865	788.38	784.447	798
chr3	48485654	48488948	Peak_1133	7877	.	30.9339	787.781	783.848	2650
chr10	91173986	91175447	Peak_1134	7875	.	32.2023	787.516	783.583	788
chr16	22448060	22449225	Peak_1135	7875	.	32.2023	787.516	783.583	619
chr20	33412258	33413906	Peak_1136	7875	.	32.2023	787.516	783.583	1031
chr6	107077025	107078128	Peak_1137	7875	.	32.2023	787.516	783.583	569
chr12	72232761	72234306	Peak_1138	7869	.	30.648	786.966	783.035	967
chr3	47420756	47424632	Peak_1139	7854	.	27.5138	785.467	781.537	1371
chr2	20646024	20648617	Peak_1140	7844	.	32.1116	784.46	780.531	1009
chr2	27433329	27436122	Peak_1141	7844	.	32.1116	784.46	780.531	1816
chr7	140178146	140179592	Peak_1142	7836	.	26.5402	783.698	779.77	532
chr1	151370855	151372877	Peak_1143	7829	.	26.8861	782.943	779.016	1392
chr15	57024922	57026309	Peak_1144	7829	.	32.0662	782.933	779.006	562
chr7	764395	767221	Peak_1145	7829	.	32.0662	782.933	779.006	2100
chr5	1633238	1635422	Peak_1146	7814	.	32.0209	781.407	777.481	885
chr2	128458012	128460173	Peak_1147	7808	.	31.9669	780.882	776.957	1592
chr18	21082908	21084768	Peak_1148	7803	.	26.9194	780.316	776.392	788
chr3	37284092	37285925	Peak_1149	7800	.	27.231	780.039	776.115	546
chr11	43665443	43666454	Peak_1150	7798	.	31.9755	779.882	775.958	478
chr11	64779472	64783610	Peak_1151	7783	.	31.9302	778.357	774.434	2482
chr14	92978795	92984464	Peak_1152	7783	.	31.9302	778.357	774.434	1280
chr16	53468001	53469594	Peak_1153	7783	.	31.9302	778.357	774.434	695
chr17	37355620	37357593	Peak_1154	7783	.	31.9302	778.357	774.434	1205
chr17	79369597	79377253	Peak_1155	7783	.	31.9302	778.357	774.434	837
chr7	95063791	95065104	Peak_1156	7783	.	31.9302	778.357	774.434	555
chr6	41039472	41041801	Peak_1157	7774	.	30.1461	777.481	773.56	1551
chr1	150038860	150040167	Peak_1158	7771	.	26.9125	777.196	773.276	742
chr19	38863824	38871290	Peak_1159	7768	.	31.8848	776.832	772.912	1779
chr8	38087200	38090153	Peak_1160	7768	.	31.8848	776.832	772.912	2075
chr1	154933408	154944860	Peak_1161	7762	.	30.8549	776.28	772.361	1155
chr6	144535908	144538102	Peak_1162	7761	.	26.2594	776.16	772.241	1493
chr2	98611503	98613629	Peak_1163	7757	.	31.5493	775.708	771.79	621
chr1	161408826	161410690	Peak_1164	7753	.	31.8394	775.308	771.39	1529
chr5	32443426	32445841	Peak_1165	7753	.	31.8394	775.308	771.39	1070
chr14	95234636	95239708	Peak_1166	7737	.	31.7941	773.785	769.869	1507
chr19	32895182	32897626	Peak_1167	7737	.	31.7941	773.785	769.869	1027
chr2	173939999	173941824	Peak_1168	7737	.	31.7941	773.785	769.869	1054
chr4	154264782	154266747	Peak_1169	7737	.	31.7941	773.785	769.869	1305
chr15	72521711	72524423	Peak_1170	7735	.	27.9798	773.518	769.602	840
chr4	140221959	140223825	Peak_1171	7722	.	31.7487	772.263	768.348	1261
chr6	122720207	122721616	Peak_1172	7722	.	27.3436	772.225	768.311	886
chr17	45000042	45001136	Peak_1173	7720	.	27.6732	772.017	768.103	613
chr3	9404340	9405308	Peak_1174	7702	.	28.3298	770.291	766.379	578
chr12	54717581	54719831	Peak_1175	7692	.	31.658	769.22	765.308	1525
chr2	228335831	228337920	Peak_1176	7692	.	31.658	769.22	765.308	1257
chr5	132386752	132390191	Peak_1177	7692	.	31.658	769.22	765.308	1250
chr3	13005094	13010627	Peak_1178	7689	.	29.3455	768.984	765.074	3857
chr6	13614360	13616442	Peak_1179	7688	.	29.6324	768.898	764.988	855
chr1	171454370	171455650	Peak_1180	7688	.	27.4065	768.892	764.982	542
chr16	30903689	30906142	Peak_1181	7686	.	25.9815	768.661	764.751	1593
chr15	78419446	78425158	Peak_1182	7676	.	31.6127	767.699	763.79	4720
chr2	153573209	153575800	Peak_1183	7676	.	31.6127	767.699	763.79	576
chr2	70520263	70522484	Peak_1184	7676	.	31.6127	767.699	763.79	528
chr8	53625883	53627744	Peak_1185	7676	.	31.6127	767.699	763.79	1465
chr7	150782307	150789836	Peak_1186	7667	.	29.7326	766.798	762.891	2338
chr2	32581566	32583598	Peak_1187	7661	.	31.5673	766.179	762.271	991
chr9	111880850	111882355	Peak_1188	7661	.	31.5673	766.179	762.271	1069
chr3	63848389	63850593	Peak_1189	7658	.	29.1499	765.831	761.924	931
chr12	112563054	112564793	Peak_1190	7656	.	27.3062	765.675	761.768	583
chr6	133134421	133136408	Peak_1191	7656	.	30.0222	765.605	761.699	1301
chr22	37953959	37961276	Peak_1192	7650	.	30.8043	765.082	761.176	2175
chr14	96828438	96830810	Peak_1193	7646	.	31.522	764.659	760.754	942
chr18	12375482	12378210	Peak_1194	7646	.	31.522	764.659	760.754	1499
chr20	7999530	8000727	Peak_1195	7646	.	31.522	764.659	760.754	622
chr2	178076651	178078378	Peak_1196	7646	.	31.522	764.659	760.754	1146
chr5	132164377	132168742	Peak_1197	7646	.	31.522	764.659	760.754	1596
chr9	34636364	34638691	Peak_1198	7646	.	31.522	764.659	760.754	1284
chr1	229760493	229762713	Peak_1199	7643	.	22.5319	764.36	760.455	1601
chr11	66024212	66027276	Peak_1200	7631	.	31.4766	763.141	759.237	1363
chr1	2160169	2166408	Peak_1201	7631	.	31.4766	763.141	759.237	1501
chr3	120314890	120315783	Peak_1202	7631	.	31.4766	763.141	759.237	504
chr9	127630047	127635304	Peak_1203	7631	.	31.4766	763.141	759.237	1675
chrX	345984	348800	Peak_1204	7631	.	31.4766	763.141	759.237	1787
chr6	110676361	110680030	Peak_1205	7621	.	25.9381	762.133	758.231	3087
chr16	2746622	2773989	Peak_1206	7617	.	29.7504	761.717	757.815	24330
chr14	104027719	104030640	Peak_1207	7616	.	31.4312	761.622	757.721	1000
chr1	113216747	113218495	Peak_1208	7608	.	24.7012	760.89	756.99	840
chr1	228673417	228677624	Peak_1209	7608	.	19.7	760.831	756.931	1113
chr15	45457557	45460847	Peak_1210	7601	.	31.3859	760.105	756.205	1441
chr2	223520128	223521202	Peak_1211	7601	.	31.3859	760.105	756.205	541
chr6	167369133	167372719	Peak_1212	7601	.	31.3859	760.105	756.205	771
chr16	30705143	30711262	Peak_1213	7594	.	25.3361	759.426	755.527	4482
chr17	4045509	4050068	Peak_1214	7592	.	30.1198	759.205	755.306	1637
chr2	242254066	242256401	Peak_1215	7590	.	30.6287	759.054	755.155	1612
chr6	166795297	166798014	Peak_1216	7589	.	26.7397	758.939	755.041	1637
chr14	64193805	64195281	Peak_1217	7585	.	31.3405	758.588	754.69	644
chr5	139486542	139488970	Peak_1218	7572	.	29.1334	757.293	753.397	506
chr10	88159350	88161723	Peak_1219	7570	.	31.2952	757.072	753.176	552
chr1	11159221	11161339	Peak_1220	7570	.	31.2952	757.072	753.176	475
chr11	82782469	82784256	Peak_1221	7570	.	31.2952	757.072	753.176	813
chr2	109334523	109336653	Peak_1222	7570	.	31.2952	757.072	753.176	1613
chr11	111895382	111896771	Peak_1223	7555	.	31.2498	755.556	751.662	609
chr11	66884974	66888023	Peak_1224	7555	.	31.2498	755.556	751.662	992
chr1	220267305	220268802	Peak_1225	7551	.	28.4569	755.16	751.267	415
chr6	4019980	4022378	Peak_1226	7547	.	29.9961	754.762	750.869	1849
chr20	1446732	1448760	Peak_1227	7540	.	31.2045	754.041	750.149	609
chr1	156561108	156563961	Peak_1228	7539	.	27.9783	753.968	750.076	638
chr7	135661385	135662466	Peak_1229	7535	.	24.5196	753.585	749.695	571
chr6	26659322	26660443	Peak_1230	7532	.	26.3555	753.293	749.403	365
chr15	78591327	78593779	Peak_1231	7530	.	28.3584	753.041	749.151	488
chr7	151722153	151725426	Peak_1232	7529	.	23.7008	752.991	749.101	762
chr7	102987877	102988803	Peak_1233	7527	.	26.1442	752.715	748.825	448
chr10	86086640	86089344	Peak_1234	7526	.	30.4184	752.686	748.795	1998
chr17	61677874	61679553	Peak_1235	7526	.	26.9736	752.622	748.732	431
chr1	35657349	35659059	Peak_1236	7525	.	31.1591	752.527	748.636	723
chr19	41767995	41773013	Peak_1237	7525	.	31.1591	752.527	748.636	2414
chr4	56814639	56815745	Peak_1238	7525	.	31.1591	752.527	748.636	602
chr22	39792604	39800458	Peak_1239	7517	.	29.9104	751.77	747.882	3377
chr14	89017297	89018762	Peak_1240	7510	.	31.1137	751.013	747.125	464
chr3	12704052	12707631	Peak_1241	7510	.	31.1137	751.013	747.125	1236
chr8	74888070	74889159	Peak_1242	7510	.	31.1137	751.013	747.125	579
chr9	139759074	139763591	Peak_1243	7510	.	31.1137	751.013	747.125	1869
chr7	43796344	43799066	Peak_1244	7495	.	31.0684	749.5	745.614	2302
chr7	75156369	75158106	Peak_1245	7495	.	31.0684	749.5	745.614	847
chr3	32611472	32612986	Peak_1246	7483	.	26.1139	748.347	744.462	589
chr1	91486686	91488369	Peak_1247	7481	.	24.7701	748.131	744.246	1242
chr5	140699680	140700810	Peak_1248	7479	.	31.023	747.988	744.103	454
chr17	78962749	78968514	Peak_1249	7464	.	30.9777	746.476	742.593	3010
chr2	220024633	220025926	Peak_1250	7464	.	30.9777	746.476	742.593	804
chr2	73337785	73340982	Peak_1251	7464	.	30.9777	746.476	742.593	1936
chr6	42419989	42421849	Peak_1252	7464	.	30.9777	746.476	742.593	373
chr15	75659660	75661518	Peak_1253	7459	.	28.3741	745.977	742.096	1093
chr1	45240042	45247294	Peak_1254	7449	.	30.9323	744.964	741.084	1460
chr20	25603622	25605963	Peak_1255	7449	.	30.9323	744.964	741.084	1451
chr5	149828228	149830392	Peak_1256	7449	.	30.9323	744.964	741.084	882
chr8	48171664	48174233	Peak_1257	7449	.	30.9323	744.964	741.084	1696
chr15	67354882	67360257	Peak_1258	7438	.	28.462	743.828	739.95	2670
chr6	28366819	28368146	Peak_1259	7437	.	27.169	743.74	739.861	582
chr2	170335038	170336716	Peak_1260	7434	.	30.887	743.454	739.575	1125
chr2	3621760	3623994	Peak_1261	7434	.	30.887	743.454	739.575	1282
chr8	101321288	101322979	Peak_1262	7434	.	30.887	743.454	739.575	616
chr22	20091908	20110185	Peak_1263	7433	.	30.121	743.334	739.456	13489
chr14	36789141	36790494	Peak_1264	7425	.	28.9231	742.535	738.658	449
chr1	109618317	109620102	Peak_1265	7424	.	28.0518	742.442	738.566	379
chr16	30781917	30792293	Peak_1266	7422	.	23.1446	742.264	738.387	5105
chr11	65483664	65488468	Peak_1267	7419	.	30.8416	741.944	738.067	4447
chr12	112854867	112857567	Peak_1268	7419	.	30.8416	741.944	738.067	2036
chr12	46122313	46124862	Peak_1269	7419	.	30.8416	741.944	738.067	2155
chr16	27214256	27216398	Peak_1270	7419	.	30.8416	741.944	738.067	1114
chr4	121842794	121844491	Peak_1271	7419	.	30.8416	741.944	738.067	728
chr15	38746094	38746997	Peak_1272	7404	.	30.7963	740.434	736.56	362
chr16	3506750	3509177	Peak_1273	7404	.	30.7963	740.434	736.56	1044
chr15	89785539	89788078	Peak_1274	7400	.	25.8409	740.02	736.146	1946
chr1	233463403	233465522	Peak_1275	7389	.	23.1105	738.932	735.059	391
chr1	36928495	36930534	Peak_1276	7389	.	30.7509	738.926	735.053	1353
chr2	214148819	214149753	Peak_1277	7389	.	30.7509	738.926	735.053	529
chr6	85471815	85474726	Peak_1278	7389	.	30.7509	738.926	735.053	1048
chr13	21347181	21348545	Peak_1279	7374	.	30.7055	737.418	733.547	591
chr1	38155102	38158798	Peak_1280	7374	.	30.7055	737.418	733.547	2656
chr4	88927767	88929824	Peak_1281	7374	.	30.7055	737.418	733.547	1342
chr6	84139941	84141924	Peak_1282	7374	.	30.7055	737.418	733.547	668
chr20	49405033	49408753	Peak_1283	7359	.	30.6602	735.91	732.042	2398
chr1	228782399	228784934	Peak_1284	7356	.	18.105	735.655	731.787	1634
chr10	105726076	105727829	Peak_1285	7354	.	28.5493	735.444	731.577	1107
chr10	99400109	99401554	Peak_1286	7346	.	29.675	734.613	730.745	641
chr1	17283253	17288560	Peak_1287	7344	.	30.6148	734.404	730.537	4206
chr17	4267774	4270932	Peak_1288	7344	.	30.6148	734.404	730.537	1745
chr3	49448626	49467295	Peak_1289	7344	.	30.6148	734.404	730.537	17999
chr2	223725453	223726698	Peak_1290	7333	.	29.0382	733.316	729.451	521
chr6	170101346	170103229	Peak_1291	7330	.	27.2089	733.019	729.154	1137
chr14	50052384	50053593	Peak_1292	7328	.	30.5695	732.898	729.032	491
chr15	65476538	65478845	Peak_1293	7328	.	30.5695	732.898	729.032	949
chr17	17104606	17110739	Peak_1294	7328	.	30.5695	732.898	729.032	4711
chr19	32836207	32837430	Peak_1295	7328	.	30.5695	732.898	729.032	557
chr20	2817907	2822715	Peak_1296	7328	.	30.5695	732.898	729.032	3201
chr7	102003917	102005396	Peak_1297	7313	.	30.5241	731.392	727.529	639
chr5	65220632	65222803	Peak_1298	7313	.	30.4103	731.347	727.485	603
chr10	104190991	104197490	Peak_1299	7298	.	30.4788	729.887	726.026	1174
chr10	27792862	27794036	Peak_1300	7298	.	30.4788	729.887	726.026	630
chr14	104386037	104388472	Peak_1301	7298	.	30.4788	729.887	726.026	1628
chr9	34125485	34129061	Peak_1302	7298	.	30.4788	729.887	726.026	925
chr9	35094814	35097849	Peak_1303	7298	.	30.4788	729.887	726.026	1613
chr15	93256795	93258366	Peak_1304	7291	.	27.0507	729.194	725.334	1157
chr1	28156640	28158115	Peak_1305	7290	.	21.8024	729.042	725.183	865
chr12	112279360	112281044	Peak_1306	7283	.	30.4334	728.383	724.524	555
chr4	15682741	15684023	Peak_1307	7283	.	30.4334	728.383	724.524	864
chr7	99061533	99064456	Peak_1308	7283	.	30.4334	728.383	724.524	2103
chr1	16678078	16679602	Peak_1309	7268	.	30.3881	726.88	723.022	652
chr1	53685300	53688862	Peak_1310	7268	.	30.3881	726.88	723.022	908
chr20	13765062	13766457	Peak_1311	7253	.	30.3427	725.377	721.521	901
chr3	121553056	121554539	Peak_1312	7253	.	30.3427	725.377	721.521	659
chr17	65240493	65247515	Peak_1313	7251	.	29.78	725.133	721.278	525
chr1	6760901	6762791	Peak_1314	7238	.	30.2974	723.875	720.021	876
chr2	69968282	69971382	Peak_1315	7238	.	30.2974	723.875	720.021	684
chr4	144105485	144107365	Peak_1316	7238	.	30.2974	723.875	720.021	858
chr15	90436646	90438104	Peak_1317	7232	.	27.8968	723.274	719.422	361
chr14	58711279	58712220	Peak_1318	7223	.	30.252	722.373	718.521	468
chr16	84536724	84541765	Peak_1319	7223	.	30.252	722.373	718.521	1860
chr21	47741602	47745757	Peak_1320	7223	.	30.252	722.373	718.521	1988
chr9	136999200	137003917	Peak_1321	7223	.	30.252	722.373	718.521	1596
chr10	5707711	5709241	Peak_1322	7223	.	30.1396	722.338	718.487	735
chr5	171709810	171711743	Peak_1323	7213	.	28.1994	721.377	717.527	1102
chr21	40554541	40556222	Peak_1324	7210	.	25.9221	721.091	717.24	596
chr3	98240978	98242196	Peak_1325	7209	.	26.1607	720.92	717.069	570
chr17	62914816	62917030	Peak_1326	7208	.	30.2066	720.872	717.022	603
chr2	216176364	216177883	Peak_1327	7208	.	30.2066	720.872	717.022	648
chr9	103114358	103115673	Peak_1328	7208	.	30.2066	720.872	717.022	607
chr7	156799954	156804932	Peak_1329	7199	.	26.5122	719.998	716.149	3847
chr3	48341698	48343700	Peak_1330	7195	.	26.3032	719.584	715.735	1056
chr6	157341955	157343541	Peak_1331	7195	.	26.3032	719.584	715.735	555
chr11	63752929	63756649	Peak_1332	7193	.	30.1613	719.372	715.523	1459
chr14	23769764	23772423	Peak_1333	7193	.	30.1613	719.372	715.523	1557
chr13	41767559	41769052	Peak_1334	7183	.	28.0082	718.308	714.461	995
chr1	162466968	162468411	Peak_1335	7181	.	26.7025	718.152	714.305	834
chr14	24024081	24026811	Peak_1336	7178	.	30.1159	717.872	714.025	1281
chr14	59950150	59951771	Peak_1337	7178	.	30.1159	717.872	714.025	728
chr4	39977915	39980088	Peak_1338	7178	.	30.1159	717.872	714.025	662
chr1	215740336	215741641	Peak_1339	7178	.	27.5839	717.825	713.979	743
chr21	34851164	34852931	Peak_1340	7172	.	28.297	717.251	713.406	867
chr7	45150420	45152201	Peak_1341	7169	.	29.4911	716.995	713.15	738
chr1	228592934	228605221	Peak_1342	7166	.	22.0889	716.642	712.797	1262
chr1	92494733	92496265	Peak_1343	7165	.	29.0336	716.574	712.729	947
chr4	140216019	140217238	Peak_1344	7165	.	28.8282	716.557	712.712	784
chrX	71933419	71935075	Peak_1345	7164	.	25.3682	716.406	712.562	545
chr16	15981708	15983526	Peak_1346	7163	.	30.0706	716.373	712.528	597
chr2	242573734	242577714	Peak_1347	7163	.	30.0706	716.373	712.528	2190
chr3	139107861	139109649	Peak_1348	7163	.	30.0706	716.373	712.528	1038
chr7	44619690	44622965	Peak_1349	7163	.	30.0706	716.373	712.528	1979
chr9	140128542	140146914	Peak_1350	7163	.	30.0706	716.373	712.528	6533
chr13	49106232	49107784	Peak_1351	7155	.	29.9845	715.536	711.693	858
chr17	55926365	55928317	Peak_1352	7154	.	29.0231	715.423	711.58	1426
chr7	102212573	102213318	Peak_1353	7148	.	30.0252	714.875	711.032	317
chr15	91489248	91505336	Peak_1354	7145	.	28.8345	714.541	710.699	9201
chr2	177133874	177135174	Peak_1355	7134	.	29.0348	713.455	709.614	428
chr12	110334872	110339113	Peak_1356	7133	.	29.9799	713.377	709.536	3346
chr3	126422115	126424037	Peak_1357	7133	.	29.9799	713.377	709.536	1058
chr3	131221222	131222091	Peak_1358	7133	.	29.9799	713.377	709.536	407
chr4	54929748	54931294	Peak_1359	7133	.	29.9799	713.377	709.536	703
chr4	144434401	144436192	Peak_1360	7127	.	29.7044	712.797	708.957	596
chr7	96338379	96339450	Peak_1361	7118	.	29.9345	711.88	708.041	571
chr3	88107281	88109270	Peak_1362	7113	.	26.6324	711.308	707.47	699
chr3	44518658	44520450	Peak_1363	7110	.	27.0637	711.088	707.25	488
chrX	152599218	152601515	Peak_1364	7104	.	27.0084	710.473	706.636	674
chr7	72395169	72396492	Peak_1365	7103	.	29.8892	710.384	706.546	647
chr15	101816240	101818753	Peak_1366	7099	.	27.3267	709.917	706.081	1188
chr1	28844007	28848540	Peak_1367	7095	.	24.5778	709.562	705.727	917
chr5	179103240	179110907	Peak_1368	7092	.	24.0993	709.279	705.443	2687
chr1	225116926	225118029	Peak_1369	7092	.	19.073	709.238	705.402	511
chr10	93557846	93559015	Peak_1370	7089	.	26.4207	708.901	705.065	601
chr3	196593777	196595653	Peak_1371	7088	.	29.8438	708.888	705.052	1219
chr10	97415527	97417342	Peak_1372	7087	.	29.5114	708.795	704.961	696
chr3	50125344	50127386	Peak_1373	7085	.	28.1586	708.575	704.741	1329
chr1	10002741	10006625	Peak_1374	7073	.	29.7984	707.393	703.559	582
chr11	68670696	68673840	Peak_1375	7073	.	29.7984	707.393	703.559	766
chr16	20911027	20913597	Peak_1376	7073	.	29.7984	707.393	703.559	1065
chr16	89935671	89941631	Peak_1377	7073	.	29.7984	707.393	703.559	3974
chr1	176175375	176177605	Peak_1378	7063	.	28.646	706.378	702.546	465
chr5	179718041	179723447	Peak_1379	7063	.	29.5841	706.356	702.524	1445
chr3	61235517	61237311	Peak_1380	7060	.	25.7416	706.024	702.192	413
chr12	124084833	124087792	Peak_1381	7058	.	29.7531	705.899	702.067	1588
chr13	47370463	47372299	Peak_1382	7058	.	29.7531	705.899	702.067	656
chr13	103450876	103453376	Peak_1383	7044	.	29.7077	704.405	700.575	1923
chr2	112641026	112642482	Peak_1384	7044	.	29.7077	704.405	700.575	504
chr3	141456665	141457993	Peak_1385	7043	.	29.2724	704.337	700.508	738
chr3	19987419	19989761	Peak_1386	7039	.	27.6288	703.997	700.168	1717
chr1	28099388	28100493	Peak_1387	7033	.	21.8144	703.341	699.512	584
chr5	138533121	138535141	Peak_1388	7029	.	29.6624	702.912	699.084	715
chr15	90195345	90199304	Peak_1389	7028	.	27.6173	702.852	699.025	3111
chr11	93516973	93518478	Peak_1390	7025	.	29.5183	702.561	698.734	802
chr16	30659119	30672904	Peak_1391	7019	.	24.0563	701.968	698.142	11550
chr20	45317373	45318401	Peak_1392	7017	.	27.9003	701.75	697.924	408
chr10	76969188	76971435	Peak_1393	7015	.	27.6832	701.507	697.681	1683
chr11	8932522	8933905	Peak_1394	7014	.	29.617	701.419	697.594	427
chr4	54243488	54244619	Peak_1395	7014	.	29.617	701.419	697.594	651
chr6	52928498	52931381	Peak_1396	7014	.	29.617	701.419	697.594	1980
chr9	125666723	125667959	Peak_1397	7014	.	29.617	701.419	697.594	737
chr9	96211867	96215995	Peak_1398	7014	.	29.617	701.419	697.594	2851
chr10	28287067	28288307	Peak_1399	6999	.	29.5717	699.928	696.104	760
chr7	132765831	132767326	Peak_1400	6999	.	29.5717	699.928	696.104	852
chr12	6449431	6453274	Peak_1401	6984	.	29.5263	698.437	694.615	1489
chr14	35871176	35875240	Peak_1402	6984	.	29.5263	698.437	694.615	2641
chr1	47798609	47800716	Peak_1403	6984	.	29.5263	698.437	694.615	1134
chr3	184428496	184430297	Peak_1404	6984	.	29.5263	698.437	694.615	1111
chr17	34898617	34902241	Peak_1405	6983	.	29.0947	698.396	694.575	3160
chr6	157743959	157745941	Peak_1406	6981	.	24.2894	698.16	694.339	808
chr3	52738080	52740799	Peak_1407	6977	.	25.2937	697.751	693.931	2064
chr1	179260171	179264199	Peak_1408	6976	.	29.4418	697.616	693.795	2922
chr16	47176624	47178808	Peak_1409	6969	.	29.481	696.946	693.126	539
chr3	49156376	49176301	Peak_1410	6969	.	29.481	696.946	693.126	1783
chr5	141301875	141305173	Peak_1411	6969	.	29.481	696.946	693.126	1313
chr12	108079233	108080843	Peak_1412	6969	.	29.0503	696.912	693.093	506
chr5	170813845	170816066	Peak_1413	6964	.	27.113	696.411	692.593	1315
chr1	1509283	1511435	Peak_1414	6954	.	29.4356	695.457	691.638	825
chr12	120631960	120633994	Peak_1415	6954	.	29.4356	695.457	691.638	703
chr14	90722647	90723568	Peak_1416	6954	.	29.4356	695.457	691.638	449
chr16	1813892	1844038	Peak_1417	6954	.	29.4356	695.457	691.638	9070
chr2	101868671	101870182	Peak_1418	6954	.	29.4356	695.457	691.638	861
chr6	43195431	43199378	Peak_1419	6954	.	29.4356	695.457	691.638	1566
chr10	13388938	13391016	Peak_1420	6939	.	29.3903	693.968	690.151	462
chr6	52148837	52149967	Peak_1421	6939	.	29.3903	693.968	690.151	466
chr7	65955462	65960277	Peak_1422	6939	.	29.3903	693.968	690.151	3322
chrX	118707725	118709685	Peak_1423	6938	.	23.0713	693.833	690.018	1282
chr16	21610092	21611860	Peak_1424	6924	.	29.3449	692.479	688.665	1069
chr9	139934863	139942836	Peak_1425	6924	.	29.3449	692.479	688.665	5307
chr7	150941762	150950654	Peak_1426	6921	.	28.364	692.114	688.301	7371
chr10	64563653	64565930	Peak_1427	6917	.	28.3321	691.79	687.977	473
chr10	43632617	43634599	Peak_1428	6911	.	28.6758	691.108	687.296	1017
chr12	120883679	120885403	Peak_1429	6909	.	29.2995	690.991	687.179	729
chr16	68055224	68058371	Peak_1430	6909	.	29.2995	690.991	687.179	2065
chr16	84732152	84734526	Peak_1431	6909	.	29.2995	690.991	687.179	1766
chr16	21963643	21965331	Peak_1432	6895	.	27.6155	689.539	685.729	571
chr12	122906009	122908526	Peak_1433	6895	.	29.2542	689.504	685.694	718
chr16	1753702	1760425	Peak_1434	6895	.	29.2542	689.504	685.694	2681
chr19	4402263	4404113	Peak_1435	6895	.	29.2542	689.504	685.694	586
chr19	54959451	54961573	Peak_1436	6895	.	29.2542	689.504	685.694	1056
chr4	2460105	2467939	Peak_1437	6895	.	29.2542	689.504	685.694	4091
chr4	41992158	41993340	Peak_1438	6895	.	29.2542	689.504	685.694	576
chr9	111774678	111776282	Peak_1439	6895	.	29.2542	689.504	685.694	791
chr9	34646030	34650611	Peak_1440	6895	.	29.2542	689.504	685.694	857
chr21	30374749	30375603	Peak_1441	6885	.	24.0629	688.54	684.731	450
chr12	6860859	6863429	Peak_1442	6880	.	29.2088	688.018	684.209	1302
chr17	48796195	48797619	Peak_1443	6880	.	29.2088	688.018	684.209	907
chr1	93249690	93251643	Peak_1444	6880	.	29.2088	688.018	684.209	760
chr22	22862235	22863661	Peak_1445	6879	.	26.4344	687.967	684.16	530
chr4	13484731	13486768	Peak_1446	6874	.	26.5736	687.493	683.686	917
chr11	69488541	69490789	Peak_1447	6865	.	29.1635	686.532	682.726	1360
chr1	202974640	202977187	Peak_1448	6865	.	29.1635	686.532	682.726	2009
chr1	26437106	26439266	Peak_1449	6865	.	29.1635	686.532	682.726	1457
chr15	28982454	28983747	Peak_1450	6865	.	29.1635	686.532	682.726	551
chr2	15731148	15732763	Peak_1451	6865	.	29.1635	686.532	682.726	1071
chr3	169482037	169483861	Peak_1452	6865	.	29.1635	686.532	682.726	554
chr7	76177820	76179730	Peak_1453	6865	.	29.1635	686.532	682.726	1069
chrX	153274272	153287133	Peak_1454	6865	.	29.1635	686.532	682.726	11367
chr16	30431567	30442285	Peak_1455	6865	.	21.1137	686.525	682.719	10255
chr6	291127	293749	Peak_1456	6865	.	27.4244	686.512	682.707	726
chr12	95610657	95612601	Peak_1457	6863	.	27.8001	686.341	682.535	1149
chr1	219346899	219348108	Peak_1458	6858	.	24.7902	685.832	682.027	523
chr5	889455	894813	Peak_1459	6850	.	29.1181	685.047	681.242	3370
chr8	144765468	144768598	Peak_1460	6850	.	29.1181	685.047	681.242	990
chr1	64058327	64060367	Peak_1461	6848	.	21.8822	684.894	681.09	888
chr1	205179669	205181254	Peak_1462	6845	.	25.863	684.56	680.756	863
chr22	21212153	21216443	Peak_1463	6841	.	27.8886	684.174	680.371	762
chr17	30675779	30677851	Peak_1464	6835	.	28.6505	683.59	679.787	1614
chr1	57110194	57111967	Peak_1465	6835	.	23.1508	683.508	679.706	943
chr11	93394215	93395520	Peak_1466	6834	.	28.2204	683.433	679.631	855
chr1	155903101	155905522	Peak_1467	6832	.	21.2582	683.202	679.4	917
chr20	30794125	30797108	Peak_1468	6820	.	29.0274	682.079	678.278	1287
chr3	10067472	10068635	Peak_1469	6812	.	26.9286	681.251	677.451	741
chr12	123010981	123012471	Peak_1470	6809	.	28.2823	680.959	677.159	400
chr17	4691458	4694005	Peak_1471	6805	.	28.9821	680.596	676.797	2081
chr4	119199265	119200488	Peak_1472	6805	.	28.9821	680.596	676.797	715
chr14	50358421	50361073	Peak_1473	6798	.	28.0698	679.851	676.053	1717
chr1	110577006	110578329	Peak_1474	6797	.	25.9702	679.794	675.996	466
chr22	40741636	40743444	Peak_1475	6791	.	27.1114	679.141	675.344	1052
chr11	125494762	125496682	Peak_1476	6791	.	28.9367	679.114	675.316	791
chr14	68140743	68143402	Peak_1477	6791	.	28.9367	679.114	675.316	713
chr5	32311540	32313361	Peak_1478	6791	.	28.9367	679.114	675.316	1213
chr6	43137934	43140868	Peak_1479	6791	.	28.9367	679.114	675.316	1358
chr8	101571267	101572301	Peak_1480	6791	.	28.9367	679.114	675.316	520
chr9	125026583	125027566	Peak_1481	6783	.	26.847	678.355	674.559	498
chr1	112297654	112299237	Peak_1482	6776	.	27.3586	677.671	673.875	1006
chr11	66312501	66321728	Peak_1483	6776	.	28.8913	677.632	673.837	910
chr20	33103068	33105055	Peak_1484	6776	.	28.8913	677.632	673.837	1299
chr20	42838465	42840598	Peak_1485	6776	.	28.8913	677.632	673.837	733
chr2	220109640	220110970	Peak_1486	6776	.	28.8913	677.632	673.837	703
chr4	4543087	4544832	Peak_1487	6776	.	28.8913	677.632	673.837	643
chr8	144684433	144701259	Peak_1488	6776	.	28.8913	677.632	673.837	15616
chr22	29137455	29138796	Peak_1489	6768	.	25.7101	676.864	673.07	692
chr9	133999593	134001709	Peak_1490	6762	.	27.0287	676.239	672.445	1487
chr12	49244876	49246262	Peak_1491	6761	.	28.846	676.151	672.358	915
chr16	58766672	58768985	Peak_1492	6761	.	28.846	676.151	672.358	1407
chr21	30257228	30258035	Peak_1493	6759	.	25.1107	675.906	672.114	443
chr6	7389383	7390645	Peak_1494	6758	.	26.5212	675.854	672.061	435
chr9	77642349	77644534	Peak_1495	6750	.	28.7296	675.02	671.228	755
chr22	39095707	39098957	Peak_1496	6750	.	26.5366	675.015	671.223	895
chr1	235489958	235492891	Peak_1497	6748	.	20.0082	674.876	671.084	775
chr6	127663951	127664973	Peak_1498	6747	.	25.1828	674.778	670.986	377
chr20	3826306	3830336	Peak_1499	6746	.	28.8006	674.671	670.879	1373
chr2	230785706	230788078	Peak_1500	6746	.	28.8006	674.671	670.879	1717
chr21	30395887	30397613	Peak_1501	6740	.	25.8149	674.071	670.28	1249
chr17	19550973	19552731	Peak_1502	6734	.	23.551	673.432	669.642	1319
chr10	6204623	6207267	Peak_1503	6731	.	28.7553	673.192	669.402	1379
chr10	104473218	104475674	Peak_1504	6717	.	28.7099	671.713	667.925	1440
chr16	23463564	23466274	Peak_1505	6717	.	28.7099	671.713	667.925	677
chr20	33679608	33681370	Peak_1506	6717	.	28.7099	671.713	667.925	1242
chr7	107531286	107532389	Peak_1507	6717	.	28.7099	671.713	667.925	452
chr19	13228227	13237877	Peak_1508	6702	.	28.6646	670.234	666.449	1098
chr20	40246141	40248306	Peak_1509	6702	.	28.6646	670.234	666.449	634
chr2	3522027	3523805	Peak_1510	6702	.	28.6646	670.234	666.449	1170
chr8	124252880	124254593	Peak_1511	6702	.	28.6646	670.234	666.449	557
chr1	245025996	245028644	Peak_1512	6698	.	20.4296	669.835	666.051	1497
chr16	30404271	30407680	Peak_1513	6695	.	24.1717	669.599	665.814	2324
chr22	31884896	31886936	Peak_1514	6693	.	25.923	669.303	665.518	416
chr10	126105868	126109552	Peak_1515	6691	.	28.5489	669.111	665.327	1110
chr2	219432369	219434326	Peak_1516	6689	.	27.1069	668.946	665.162	1508
chr1	211431583	211433140	Peak_1517	6687	.	28.6192	668.757	664.973	619
chr13	50365654	50368700	Peak_1518	6687	.	28.6192	668.757	664.973	690
chr1	39570165	39572433	Peak_1519	6687	.	28.6192	668.757	664.973	1070
chr22	37407810	37428166	Peak_1520	6687	.	28.6192	668.757	664.973	7435
chr22	50679112	50692733	Peak_1521	6687	.	28.6192	668.757	664.973	4394
chr2	88354112	88356379	Peak_1522	6687	.	28.6192	668.757	664.973	959
chr4	111117033	111119198	Peak_1523	6687	.	28.6192	668.757	664.973	914
chr5	138088211	138090071	Peak_1524	6687	.	28.6192	668.757	664.973	1179
chr7	149569258	149573569	Peak_1525	6676	.	24.9116	667.699	663.917	1356
chr16	30071908	30088226	Peak_1526	6676	.	24.0915	667.656	663.874	4667
chr17	42610759	42612668	Peak_1527	6674	.	26.5771	667.401	663.619	447
chr15	31283162	31284874	Peak_1528	6672	.	28.5739	667.28	663.498	922
chr2	208889809	208891028	Peak_1529	6672	.	28.5739	667.28	663.498	515
chr5	111495716	111497191	Peak_1530	6672	.	28.5739	667.28	663.498	1026
chrX	56589737	56592284	Peak_1531	6672	.	28.5739	667.28	663.498	467
chr1	184354674	184357328	Peak_1532	6669	.	25.5305	666.908	663.127	1120
chr19	506057	510064	Peak_1533	6658	.	28.5285	665.804	662.024	1664
chr3	133380048	133381326	Peak_1534	6658	.	28.5285	665.804	662.024	533
chr7	72990555	72994426	Peak_1535	6658	.	28.5285	665.804	662.024	2117
chr7	99932820	99934357	Peak_1536	6658	.	28.5285	665.804	662.024	1104
chr1	208039566	208043147	Peak_1537	6657	.	26.7107	665.797	662.018	2730
chr10	119132876	119136702	Peak_1538	6646	.	27.8842	664.624	660.846	1942
chr11	3399692	3400676	Peak_1539	6643	.	28.4831	664.328	660.55	495
chr19	6422684	6428310	Peak_1540	6643	.	28.4831	664.328	660.55	2942
chr3	169898483	169899780	Peak_1541	6643	.	28.4831	664.328	660.55	491
chr9	26956087	26956974	Peak_1542	6632	.	28.1602	663.242	659.466	444
chr10	35624554	35626729	Peak_1543	6628	.	28.4378	662.854	659.077	606
chr22	50310044	50316305	Peak_1544	6628	.	28.4378	662.854	659.077	1907
chr19	44860331	44861177	Peak_1545	6626	.	25.5044	662.656	658.881	418
chr21	30445266	30446551	Peak_1546	6620	.	23.2581	662.092	658.317	501
chr12	7078441	7080929	Peak_1547	6613	.	28.3924	661.38	657.605	1242
chr3	53302641	53306177	Peak_1548	6599	.	24.2525	659.928	656.156	1568
chr1	22777184	22779375	Peak_1549	6599	.	28.3471	659.906	656.134	1558
chr14	77278344	77279674	Peak_1550	6599	.	28.3471	659.906	656.134	658
chr19	650773	668645	Peak_1551	6599	.	28.3471	659.906	656.134	12117
chr3	141205213	141207000	Peak_1552	6599	.	28.3471	659.906	656.134	915
chr11	118271445	118272944	Peak_1553	6596	.	27.1928	659.68	655.909	1071
chr7	138144684	138146200	Peak_1554	6594	.	27.2716	659.469	655.698	604
chr2	74699016	74702757	Peak_1555	6586	.	26.1351	658.647	654.877	696
chr11	14520628	14521785	Peak_1556	6584	.	28.3017	658.433	654.663	645
chr1	35733913	35735191	Peak_1557	6584	.	28.3017	658.433	654.663	637
chr14	23501002	23504599	Peak_1558	6569	.	28.2564	656.962	653.193	2883
chr12	77156832	77158844	Peak_1559	6554	.	28.211	655.49	651.724	1427
chr16	67310951	67323299	Peak_1560	6554	.	28.211	655.49	651.724	2132
chr18	11979729	11982715	Peak_1561	6554	.	28.211	655.49	651.724	909
chr20	39761735	39768083	Peak_1562	6554	.	28.211	655.49	651.724	4055
chr7	6745524	6746995	Peak_1563	6554	.	28.211	655.49	651.724	815
chr10	94351016	94353504	Peak_1564	6548	.	25.2494	654.862	651.097	419
chr10	104208516	104213078	Peak_1565	6540	.	28.1657	654.02	650.255	2113
chr4	152020216	152021502	Peak_1566	6540	.	28.1657	654.02	650.255	747
chr9	4740367	4742128	Peak_1567	6540	.	28.1657	654.02	650.255	662
chr22	20746395	20750463	Peak_1568	6538	.	25.5164	653.886	650.122	2217
chr1	231003402	231005224	Peak_1569	6527	.	21.6298	652.733	648.97	601
chr11	10562010	10563245	Peak_1570	6525	.	28.1203	652.55	648.787	580
chr14	50318908	50320008	Peak_1571	6525	.	28.1203	652.55	648.787	450
chr2	120770245	120771408	Peak_1572	6525	.	28.1203	652.55	648.787	665
chr17	66242168	66244958	Peak_1573	6524	.	27.5832	652.409	648.647	2204
chr6	1614005	1616048	Peak_1574	6520	.	27.2455	652.084	648.322	1520
chr10	14919869	14921813	Peak_1575	6518	.	27.3257	651.875	648.113	1232
chrX	73163787	73164686	Peak_1576	6514	.	24.1911	651.455	647.694	533
chr14	21904876	21907355	Peak_1577	6510	.	28.075	651.081	647.32	772
chr5	112849109	112850356	Peak_1578	6510	.	28.075	651.081	647.32	428
chr8	145512240	145516842	Peak_1579	6510	.	28.075	651.081	647.32	3277
chr11	120894394	120895819	Peak_1580	6503	.	27.9946	650.301	646.542	579
chr1	226303469	226312165	Peak_1581	6499	.	18.5463	649.997	646.237	6577
chr1	201122632	201125847	Peak_1582	6496	.	25.3983	649.615	645.856	629
chr10	70090163	70092992	Peak_1583	6496	.	28.0296	649.612	645.853	2353
chr12	98987128	98988413	Peak_1584	6496	.	28.0296	649.612	645.853	490
chr14	78264803	78267237	Peak_1585	6496	.	28.0296	649.612	645.853	1792
chr15	65424670	65426914	Peak_1586	6496	.	28.0296	649.612	645.853	836
chr5	81267413	81268592	Peak_1587	6496	.	28.0296	649.612	645.853	624
chr4	108910548	108912269	Peak_1588	6496	.	27.6096	649.604	645.846	788
chr11	13689257	13691208	Peak_1589	6481	.	27.9842	648.144	644.387	1314
chr1	1708890	1715731	Peak_1590	6481	.	27.9842	648.144	644.387	728
chr19	46913203	46921199	Peak_1591	6481	.	27.9842	648.144	644.387	3550
chr1	9598073	9600611	Peak_1592	6481	.	27.9842	648.144	644.387	1749
chr8	55013743	55014987	Peak_1593	6481	.	27.9842	648.144	644.387	462
chr7	139043306	139045641	Peak_1594	6480	.	22.8977	648.047	644.291	882
chr17	28803805	28805011	Peak_1595	6466	.	27.9389	646.677	642.922	713
chr17	59453508	59479979	Peak_1596	6466	.	27.9389	646.677	642.922	23254
chr2	109149915	109151560	Peak_1597	6466	.	27.9389	646.677	642.922	1231
chr2	220434656	220438042	Peak_1598	6466	.	27.9389	646.677	642.922	1036
chr8	42248562	42250131	Peak_1599	6466	.	27.9389	646.677	642.922	917
chr8	9413183	9414341	Peak_1600	6466	.	27.9389	646.677	642.922	466
chr13	53029129	53030311	Peak_1601	6452	.	27.8935	645.211	641.457	701
chr17	80375749	80377012	Peak_1602	6452	.	27.8935	645.211	641.457	729
chr5	149864120	149866857	Peak_1603	6452	.	27.8935	645.211	641.457	1961
chr6	83777085	83778177	Peak_1604	6452	.	27.8935	645.211	641.457	529
chr8	42008965	42011441	Peak_1605	6452	.	27.8935	645.211	641.457	1941
chr9	124359996	124363320	Peak_1606	6452	.	27.8935	645.211	641.457	765
chr1	27215846	27217792	Peak_1607	6440	.	25.5252	644.086	640.334	751
chr15	43425018	43426785	Peak_1608	6437	.	27.8482	643.745	639.994	940
chr19	58513230	58516077	Peak_1609	6437	.	27.8482	643.745	639.994	772
chr20	55926035	55927076	Peak_1610	6432	.	27.8012	643.29	639.54	471
chr4	118006210	118007097	Peak_1611	6428	.	27.6507	642.849	639.099	556
chr21	47876578	47879382	Peak_1612	6422	.	27.8028	642.28	638.531	1914
chr5	78280133	78281853	Peak_1613	6422	.	27.8028	642.28	638.531	904
chr9	86321870	86323815	Peak_1614	6422	.	27.8028	642.28	638.531	814
chr1	226294905	226300576	Peak_1615	6421	.	20.6856	642.144	638.396	3289
chr10	93683222	93684177	Peak_1616	6414	.	23.838	641.483	637.735	483
chr21	46220742	46223162	Peak_1617	6412	.	24.3084	641.208	637.46	826
chr14	100675863	100681519	Peak_1618	6408	.	27.7575	640.816	637.068	4739
chr17	2238886	2242028	Peak_1619	6408	.	27.7575	640.816	637.068	751
chr1	8936652	8939721	Peak_1620	6408	.	27.7575	640.816	637.068	1783
chr2	202315720	202317303	Peak_1621	6408	.	27.7575	640.816	637.068	1045
chr7	87848160	87849945	Peak_1622	6408	.	27.7575	640.816	637.068	1060
chr1	32178860	32185143	Peak_1623	6405	.	22.388	640.584	636.837	2262
chr1	160231526	160232720	Peak_1624	6402	.	23.8983	640.275	636.529	616
chr14	78226765	78227798	Peak_1625	6398	.	25.4051	639.814	636.068	531
chr14	60631370	60632595	Peak_1626	6393	.	27.7121	639.352	635.607	737
chr17	30771019	30772488	Peak_1627	6393	.	27.7121	639.352	635.607	741
chr9	101017262	101019141	Peak_1628	6393	.	27.7121	639.352	635.607	1081
chr1	55229448	55230467	Peak_1629	6391	.	22.4186	639.108	635.364	470
chr3	5228832	5230984	Peak_1630	6380	.	25.7046	638.091	634.348	854
chr1	24103788	24105650	Peak_1631	6378	.	27.6668	637.889	634.146	1343
chr14	50099660	50103151	Peak_1632	6378	.	27.6668	637.889	634.146	1208
chr19	36704963	36706509	Peak_1633	6378	.	27.6668	637.889	634.146	943
chr1	32859321	32860832	Peak_1634	6373	.	19.7634	637.388	633.646	523
chr10	70660195	70661728	Peak_1635	6373	.	22.646	637.321	633.578	416
chr11	72523635	72529636	Peak_1636	6364	.	27.6214	636.427	632.685	1324
chr12	132433041	132436641	Peak_1637	6364	.	27.6214	636.427	632.685	1633
chr2	170655089	170656190	Peak_1638	6364	.	27.6214	636.427	632.685	391
chr5	150459537	150461256	Peak_1639	6364	.	27.6214	636.427	632.685	899
chr3	69061217	69063458	Peak_1640	6362	.	25.9982	636.226	632.485	1749
chr1	46151777	46156201	Peak_1641	6360	.	26.2722	636.082	632.341	1231
chrX	150066148	150068447	Peak_1642	6353	.	26.3911	635.302	631.562	788
chr1	227750561	227751933	Peak_1643	6352	.	19.3413	635.256	631.516	797
chr3	112737807	112738968	Peak_1644	6352	.	24.3794	635.234	631.494	528
chr10	35102600	35104270	Peak_1645	6349	.	27.576	634.966	631.226	844
chr20	60715783	60719828	Peak_1646	6349	.	27.576	634.966	631.226	2426
chr2	65454118	65456261	Peak_1647	6349	.	27.576	634.966	631.226	1130
chr3	126192085	126196030	Peak_1648	6349	.	27.576	634.966	631.226	2354
chr1	165666913	165668204	Peak_1649	6348	.	24.6919	634.878	631.139	795
chr17	56083564	56086527	Peak_1650	6345	.	24.0646	634.513	630.775	743
chr22	39051710	39053889	Peak_1651	6343	.	25.6367	634.391	630.652	1184
chr16	84149743	84151795	Peak_1652	6335	.	27.5307	633.505	629.767	593
chr19	40696205	40699170	Peak_1653	6335	.	27.5307	633.505	629.767	941
chr20	3182346	3185741	Peak_1654	6335	.	27.5307	633.505	629.767	2839
chr20	44440397	44442192	Peak_1655	6335	.	27.5307	633.505	629.767	1009
chr2	128568020	128569372	Peak_1656	6335	.	27.5307	633.505	629.767	476
chr12	123236966	123238206	Peak_1657	6333	.	27.5168	633.37	629.634	511
chr1	227010580	227017072	Peak_1658	6332	.	18.7265	633.232	629.496	5248
chr10	43930596	43933098	Peak_1659	6320	.	27.4853	632.045	628.309	1614
chr11	33756592	33758664	Peak_1660	6320	.	27.4853	632.045	628.309	1185
chr16	23606451	23608047	Peak_1661	6320	.	27.4853	632.045	628.309	1006
chr7	42950848	42952170	Peak_1662	6320	.	27.4853	632.045	628.309	515
chr17	42147642	42148818	Peak_1663	6319	.	25.7784	631.922	628.188	773
chr22	37591958	37610451	Peak_1664	6317	.	26.1455	631.769	628.034	3390
chr6	118971478	118973869	Peak_1665	6309	.	24.6865	630.914	627.18	965
chr7	100886460	100890476	Peak_1666	6305	.	27.44	630.586	626.852	1676
chr1	167904310	167906932	Peak_1667	6304	.	22.8528	630.49	626.758	1348
chr9	101983366	101985211	Peak_1668	6298	.	26.6417	629.805	626.072	576
chr11	67792228	67821062	Peak_1669	6291	.	27.3946	629.127	625.395	6037
chr15	85112581	85114532	Peak_1670	6291	.	27.3946	629.127	625.395	1243
chr2	220407456	220409705	Peak_1671	6291	.	27.3946	629.127	625.395	630
chr2	224808562	224810364	Peak_1672	6291	.	27.3946	629.127	625.395	1389
chr3	49724012	49729673	Peak_1673	6291	.	27.3946	629.127	625.395	2766
chr4	87812845	87814118	Peak_1674	6291	.	27.3946	629.127	625.395	529
chr5	115419680	115421330	Peak_1675	6291	.	27.3946	629.127	625.395	1120
chr6	159237776	159241185	Peak_1676	6285	.	26.4155	628.525	624.794	2889
chr21	38067982	38080110	Peak_1677	6276	.	27.3493	627.669	623.939	3706
chr22	51013508	51023253	Peak_1678	6276	.	27.3493	627.669	623.939	8246
chr5	110074110	110075449	Peak_1679	6276	.	27.3493	627.669	623.939	896
chr6	36409882	36411582	Peak_1680	6276	.	27.3493	627.669	623.939	1067
chr1	117450850	117455080	Peak_1681	6266	.	25.2845	626.67	622.941	2037
chr22	19835624	19844426	Peak_1682	6266	.	24.8308	626.651	622.923	6509
chr17	74448193	74449652	Peak_1683	6266	.	26.9305	626.623	622.894	786
chr6	160112885	160115541	Peak_1684	6266	.	26.9305	626.623	622.894	1169
chr7	150724947	150728139	Peak_1685	6265	.	20.9299	626.597	622.869	805
chr10	733281	735758	Peak_1687	6262	.	27.3039	626.212	622.484	1739
chr19	35224336	35225966	Peak_1688	6262	.	27.3039	626.212	622.484	922
chr8	57905244	57906701	Peak_1689	6262	.	27.3039	626.212	622.484	941
chr1	65886154	65887015	Peak_1690	6250	.	21.6259	625.053	621.327	420
chr11	119034941	119041110	Peak_1691	6247	.	27.2585	624.756	621.029	4665
chr14	69657902	69659014	Peak_1692	6247	.	27.2585	624.756	621.029	403
chr20	31988330	31991076	Peak_1693	6247	.	27.2585	624.756	621.029	839
chr3	149529993	149531893	Peak_1694	6247	.	27.2585	624.756	621.029	508
chr5	138896225	138902567	Peak_1695	6247	.	27.2585	624.756	621.029	1296
chr7	95950580	95951918	Peak_1696	6247	.	27.2585	624.756	621.029	508
chr12	58144132	58146572	Peak_1697	6233	.	27.2132	623.3	619.576	1890
chr19	4967460	4973991	Peak_1698	6233	.	27.2132	623.3	619.576	1884
chr2	106360407	106364005	Peak_1699	6233	.	27.2132	623.3	619.576	1443
chr4	6782935	6785824	Peak_1700	6233	.	27.2132	623.3	619.576	1830
chr6	7909453	7913958	Peak_1701	6233	.	27.2132	623.3	619.576	709
chr8	55047260	55048519	Peak_1702	6233	.	27.2132	623.3	619.576	454
chr5	177630718	177632817	Peak_1703	6231	.	26.4841	623.191	619.467	1107
chr17	47072650	47076340	Peak_1704	6218	.	25.2022	621.847	618.125	2410
chr10	99092343	99095767	Peak_1705	6218	.	27.1678	621.845	618.123	1449
chr17	16255475	16257890	Peak_1706	6218	.	27.1678	621.845	618.123	950
chr17	75135207	75137867	Peak_1707	6218	.	27.1678	621.845	618.123	1302
chr2	232466981	232471586	Peak_1708	6218	.	27.1678	621.845	618.123	2389
chr22	44419468	44423638	Peak_1709	6218	.	27.1678	621.845	618.123	401
chr6	33238995	33240484	Peak_1710	6218	.	27.1678	621.845	618.123	988
chr6	96969376	96970396	Peak_1711	6218	.	27.1678	621.845	618.123	446
chr2	190648301	190649753	Peak_1712	6214	.	27.1221	621.402	617.68	717
chr15	75916685	75918879	Peak_1713	6209	.	22.238	620.923	617.202	1676
chr16	18936582	18938669	Peak_1714	6203	.	27.1225	620.391	616.67	623
chr22	24104845	24114448	Peak_1715	6203	.	27.1225	620.391	616.67	5901
chrX	153625249	153632166	Peak_1716	6203	.	27.1225	620.391	616.67	1035
chr12	125477529	125480069	Peak_1717	6189	.	27.0771	618.937	615.219	999
chr13	115078905	115080553	Peak_1718	6189	.	27.0771	618.937	615.219	1214
chr7	76007913	76011379	Peak_1719	6189	.	27.0771	618.937	615.219	1310
chr7	99516387	99517792	Peak_1720	6189	.	27.0771	618.937	615.219	492
chr1	54665087	54666771	Peak_1721	6188	.	21.5027	618.827	615.11	1027
chr11	125756886	125758780	Peak_1722	6186	.	26.04	618.7	614.982	999
chr17	40949495	40951771	Peak_1723	6179	.	22.7525	617.945	614.228	1109
chr10	3213572	3215273	Peak_1724	6174	.	27.0318	617.485	613.768	1117
chr16	89159594	89164378	Peak_1725	6174	.	27.0318	617.485	613.768	824
chr19	58888884	58899730	Peak_1726	6174	.	27.0318	617.485	613.768	3354
chr8	110345587	110347136	Peak_1727	6174	.	27.0318	617.485	613.768	1098
chr3	69100168	69101784	Peak_1728	6174	.	23.343	617.446	613.73	1089
chr11	10878809	10880713	Peak_1729	6171	.	26.2797	617.125	613.41	1308
chr4	75023175	75024412	Peak_1730	6168	.	26.761	616.871	613.155	401
chr1	150942817	150948491	Peak_1731	6164	.	26.0123	616.423	612.708	4144
chr14	102782743	102787830	Peak_1732	6160	.	26.9864	616.033	612.318	3650
chr14	74415483	74418045	Peak_1733	6160	.	26.9864	616.033	612.318	1616
chr20	62692715	62698717	Peak_1734	6160	.	26.9864	616.033	612.318	1417
chr2	86849523	86851918	Peak_1735	6160	.	26.9864	616.033	612.318	1108
chr3	160472104	160475587	Peak_1736	6160	.	26.9864	616.033	612.318	641
chr5	134181268	134182477	Peak_1737	6160	.	26.9864	616.033	612.318	530
chr16	50401996	50403138	Peak_1738	6145	.	26.9411	614.581	610.868	691
chr17	41150039	41151520	Peak_1739	6145	.	26.9411	614.581	610.868	529
chr19	2425245	2433387	Peak_1740	6145	.	26.9411	614.581	610.868	2517
chr3	179040152	179041904	Peak_1741	6145	.	26.9411	614.581	610.868	1347
chr10	88515226	88517447	Peak_1742	6145	.	25.5403	614.553	610.841	1412
chr16	2093033	2107789	Peak_1743	6143	.	24.685	614.311	610.599	4701
chr11	75293063	75296883	Peak_1744	6131	.	26.8957	613.131	609.419	1262
chr19	8069064	8071208	Peak_1745	6131	.	26.8957	613.131	609.419	1206
chr7	102937552	102938492	Peak_1746	6131	.	26.8957	613.131	609.419	532
chr22	32145426	32150516	Peak_1747	6130	.	25.2103	613.074	609.364	450
chr18	22006091	22007378	Peak_1748	6123	.	21.7082	612.304	608.594	766
chr1	167423705	167426901	Peak_1749	6120	.	25.6816	612.048	608.339	804
chr14	24663773	24665692	Peak_1750	6116	.	26.8503	611.681	607.971	1329
chr4	57840488	57846022	Peak_1751	6116	.	26.8503	611.681	607.971	4716
chr4	178230747	178231648	Peak_1752	6107	.	26.551	610.782	607.074	447
chr21	37431453	37433262	Peak_1753	6105	.	24.3457	610.6	606.892	1034
chr11	62412420	62418998	Peak_1754	6102	.	26.805	610.232	606.524	1322
chr11	63952073	63956033	Peak_1755	6102	.	26.805	610.232	606.524	856
chr1	17238126	17243758	Peak_1756	6102	.	26.805	610.232	606.524	2767
chr19	10653685	10656874	Peak_1757	6102	.	26.805	610.232	606.524	1166
chr4	7068838	7071066	Peak_1758	6102	.	26.805	610.232	606.524	628
chr3	140660223	140661837	Peak_1759	6087	.	26.7596	608.783	605.078	1120
chr3	52930502	52932014	Peak_1760	6082	.	24.6671	608.263	604.559	899
chr18	29522177	29523781	Peak_1761	6081	.	18.9999	608.176	604.472	700
chr11	9593421	9597063	Peak_1762	6081	.	26.3834	608.13	604.426	2105
chr6	151710689	151712813	Peak_1763	6070	.	24.0245	607.043	603.34	517
chr17	76373853	76376428	Peak_1764	6068	.	26.6693	606.9	603.197	1054
chr6	79786599	79788705	Peak_1765	6066	.	25.6394	606.658	602.955	1514
chr13	99228046	99230508	Peak_1766	6058	.	26.6689	605.888	602.187	978
chr15	40674803	40675885	Peak_1767	6058	.	26.6689	605.888	602.187	647
chr16	24740502	24741814	Peak_1768	6058	.	26.6689	605.888	602.187	678
chr6	99796078	99798188	Peak_1769	6058	.	26.6689	605.888	602.187	1505
chr8	124779951	124781518	Peak_1770	6058	.	26.6689	605.888	602.187	980
chrX	153990627	153992405	Peak_1771	6048	.	24.8964	604.848	601.148	775
chr1	23503441	23504863	Peak_1772	6044	.	26.6236	604.442	600.742	912
chr17	28926341	28928745	Peak_1773	6044	.	26.6236	604.442	600.742	1220
chr17	37822783	37838423	Peak_1774	6044	.	26.6236	604.442	600.742	2037
chr2	241499412	241501024	Peak_1775	6044	.	26.6236	604.442	600.742	985
chr21	35747041	35748777	Peak_1776	6043	.	23.3656	604.371	600.672	898
chr6	166755393	166756749	Peak_1777	6043	.	24.3957	604.353	600.654	933
chr17	43393467	43397065	Peak_1778	6037	.	25.2595	603.74	600.041	618
chr10	135115247	135124585	Peak_1779	6034	.	25.4264	603.488	599.789	7234
chr10	43900808	43905591	Peak_1780	6029	.	26.5782	602.997	599.299	3689
chr14	23938031	23939451	Peak_1781	6029	.	26.5782	602.997	599.299	1067
chr3	47321156	47325780	Peak_1782	6029	.	26.5782	602.997	599.299	3234
chr5	65017065	65019068	Peak_1783	6029	.	26.5782	602.997	599.299	630
chr5	6632409	6634379	Peak_1784	6029	.	26.5782	602.997	599.299	643
chr8	48920414	48922264	Peak_1785	6029	.	26.5782	602.997	599.299	714
chr17	28705156	28707088	Peak_1786	6026	.	25.6398	602.696	598.999	1120
chr19	39465565	39468050	Peak_1787	6026	.	25.5354	602.625	598.928	450
chr6	114177970	114181929	Peak_1788	6017	.	25.4542	601.796	598.1	3157
chrX	70502772	70504174	Peak_1789	6017	.	24.4285	601.795	598.099	919
chr10	45453601	45456285	Peak_1790	6015	.	26.5329	601.552	597.856	1284
chr12	124065598	124069964	Peak_1791	6015	.	26.5329	601.552	597.856	3691
chr3	127306564	127311109	Peak_1792	6015	.	26.5329	601.552	597.856	2736
chr6	30311472	30313554	Peak_1793	6015	.	26.5329	601.552	597.856	1575
chr9	140195246	140202375	Peak_1794	6015	.	26.5329	601.552	597.856	745
chr22	19278227	19280527	Peak_1795	6015	.	22.2536	601.535	597.839	1676
chr1	185125225	185126877	Peak_1796	6012	.	23.0942	601.229	597.534	512
chr1	46215495	46217674	Peak_1797	6006	.	24.8681	600.633	596.939	835
chr5	72143702	72145081	Peak_1798	6003	.	26.1004	600.335	596.64	522
chr14	61113610	61117119	Peak_1799	6001	.	26.4875	600.108	596.414	2340
chr14	77923411	77925346	Peak_1800	6001	.	26.4875	600.108	596.414	1238
chr19	9731433	9732610	Peak_1801	6001	.	26.4875	600.108	596.414	710
chr2	263915	265527	Peak_1802	6001	.	26.4875	600.108	596.414	1205
chr3	48884298	48891282	Peak_1803	6001	.	26.4875	600.108	596.414	724
chr6	42945666	42948942	Peak_1804	6001	.	26.4875	600.108	596.414	1089
chr1	107598490	107600676	Peak_1805	5999	.	22.7434	599.941	596.248	1155
chr3	81809948	81811267	Peak_1806	5998	.	25.5537	599.84	596.147	850
chr15	73075330	73079860	Peak_1807	5993	.	23.6765	599.306	595.613	889
chr4	71569943	71571894	Peak_1808	5989	.	25.568	598.996	595.303	1372
chr1	15852852	15854019	Peak_1809	5986	.	26.4422	598.665	594.972	624
chr11	66607355	66629078	Peak_1810	5986	.	26.4422	598.665	594.972	3267
chr12	122983851	122986148	Peak_1811	5986	.	26.4422	598.665	594.972	1575
chr1	43828126	43835316	Peak_1812	5986	.	26.4422	598.665	594.972	5848
chr15	81292574	81296053	Peak_1813	5986	.	26.4422	598.665	594.972	1075
chr16	67062349	67064210	Peak_1814	5986	.	26.4422	598.665	594.972	1039
chr4	146018754	146020128	Peak_1815	5986	.	26.4422	598.665	594.972	427
chrX	153604700	153609897	Peak_1816	5986	.	26.4422	598.665	594.972	3133
chr9	128468785	128470731	Peak_1817	5986	.	23.1171	598.649	594.958	551
chr22	38294045	38310546	Peak_1818	5978	.	25.3543	597.812	594.121	8403
chr16	29864151	29880821	Peak_1819	5973	.	20.2518	597.39	593.699	10138
chr1	52830641	52832454	Peak_1820	5972	.	26.3968	597.223	593.532	1055
chr4	71704372	71706854	Peak_1821	5972	.	26.3968	597.223	593.532	990
chr9	86570832	86572271	Peak_1822	5972	.	26.3968	597.223	593.532	668
chrX	134124629	134125605	Peak_1823	5961	.	25.4816	596.142	592.454	413
chr1	36689334	36690937	Peak_1824	5957	.	26.3514	595.781	592.092	961
chr4	2535737	2539650	Peak_1825	5957	.	26.3514	595.781	592.092	3302
chr5	470945	474361	Peak_1826	5957	.	26.3514	595.781	592.092	1930
chr13	73300916	73302511	Peak_1827	5957	.	16.6439	595.706	592.019	755
chr1	226186402	226187773	Peak_1828	5954	.	14.0157	595.48	591.793	519
chr3	23957745	23959678	Peak_1829	5948	.	22.5487	594.808	591.121	1099
chr19	45392564	45402273	Peak_1830	5943	.	26.3061	594.34	590.653	2190
chr17	53828098	53829353	Peak_1831	5942	.	25.8929	594.298	590.613	435
chr10	88853560	88856478	Peak_1832	5941	.	24.3511	594.168	590.483	1703
chr8	101732763	101735373	Peak_1833	5940	.	25.2784	594.079	590.393	358
chr5	112195534	112197535	Peak_1834	5932	.	25.3953	593.292	589.607	1638
chr1	231113385	231115367	Peak_1835	5930	.	18.5779	593.032	589.347	1009
chr1	11333131	11334977	Peak_1836	5928	.	26.2607	592.9	589.215	335
chr12	64845048	64846618	Peak_1837	5928	.	26.2607	592.9	589.215	1111
chr1	53702708	53705840	Peak_1838	5928	.	26.2607	592.9	589.215	1375
chr17	27228957	27230605	Peak_1839	5928	.	26.2607	592.9	589.215	908
chr5	112256563	112258433	Peak_1840	5928	.	26.2607	592.9	589.215	658
chr22	38653368	38670075	Peak_1841	5927	.	20.7748	592.791	589.108	15444
chr1	224517295	224519003	Peak_1842	5925	.	17.5476	592.516	588.833	383
chr12	104349961	104351655	Peak_1843	5914	.	26.2154	591.46	587.777	819
chr12	133531195	133534839	Peak_1844	5914	.	26.2154	591.46	587.777	1607
chr12	32111925	32113234	Peak_1845	5914	.	26.2154	591.46	587.777	658
chr15	41707742	41710247	Peak_1846	5914	.	26.2154	591.46	587.777	1857
chr19	11706612	11709268	Peak_1847	5914	.	26.2154	591.46	587.777	1826
chr19	59054709	59058124	Peak_1848	5914	.	26.2154	591.46	587.777	1245
chr5	151149318	151152680	Peak_1849	5914	.	26.2154	591.46	587.777	1458
chr7	32996177	32999064	Peak_1850	5914	.	26.2154	591.46	587.777	1113
chr9	111695480	111697289	Peak_1851	5914	.	26.2154	591.46	587.777	831
chrX	16729741	16731402	Peak_1852	5914	.	26.2154	591.46	587.777	861
chr18	29597888	29601462	Peak_1853	5912	.	17.9317	591.298	587.617	890
chr17	59940165	59941182	Peak_1854	5902	.	24.0813	590.297	586.616	413
chr11	4628925	4629848	Peak_1855	5900	.	26.17	590.021	586.341	464
chr12	125050351	125056929	Peak_1856	5900	.	26.17	590.021	586.341	1510
chr15	91413604	91417906	Peak_1857	5900	.	26.17	590.021	586.341	1792
chr5	70881797	70884094	Peak_1858	5900	.	26.17	590.021	586.341	1418
chr7	6616885	6618455	Peak_1859	5900	.	26.17	590.021	586.341	337
chr7	140770381	140774954	Peak_1860	5897	.	21.9775	589.785	586.106	4047
chr10	93169123	93170901	Peak_1861	5892	.	25.1954	589.295	585.616	586
chr3	49892245	49894680	Peak_1862	5890	.	21.1824	589.027	585.348	1588
chr1	53017854	53019803	Peak_1863	5889	.	25.9568	588.949	585.27	667
chr5	72860625	72862012	Peak_1864	5885	.	26.1247	588.583	584.904	570
chr9	131083780	131086962	Peak_1865	5885	.	26.1247	588.583	584.904	1361
chr20	60757485	60760389	Peak_1866	5876	.	25.7188	587.611	583.934	737
chr17	42580039	42581656	Peak_1867	5876	.	24.5573	587.607	583.93	464
chr11	12397871	12400122	Peak_1868	5871	.	26.0793	587.146	583.469	1792
chr1	20958615	20960676	Peak_1869	5871	.	26.0793	587.146	583.469	1589
chr17	76835656	76837860	Peak_1870	5871	.	26.0793	587.146	583.469	1113
chr2	131099096	131101818	Peak_1871	5871	.	26.0793	587.146	583.469	1539
chr2	179344591	179345975	Peak_1872	5871	.	26.0793	587.146	583.469	706
chr5	159826358	159827332	Peak_1873	5871	.	26.0793	587.146	583.469	523
chr9	91924999	91926825	Peak_1874	5871	.	26.0793	587.146	583.469	412
chr13	79176547	79178154	Peak_1875	5866	.	18.276	586.618	582.942	856
chr19	21264717	21266264	Peak_1876	5857	.	26.034	585.71	582.035	390
chr20	25387909	25389439	Peak_1877	5855	.	25.0213	585.559	581.885	547
chr1	173445766	173447631	Peak_1878	5844	.	22.8693	584.438	580.765	1011
chr11	32111923	32114453	Peak_1879	5842	.	25.9886	584.274	580.601	1027
chr12	123458262	123486769	Peak_1880	5842	.	25.9886	584.274	580.601	7195
chr12	88535251	88536777	Peak_1881	5842	.	25.9886	584.274	580.601	519
chr13	37633038	37634152	Peak_1882	5842	.	25.9886	584.274	580.601	607
chr3	118958851	118960088	Peak_1883	5842	.	25.9886	584.274	580.601	653
chr3	10289697	10291654	Peak_1884	5838	.	24.8587	583.898	580.226	510
chr12	56497556	56499321	Peak_1885	5837	.	24.3716	583.713	580.041	728
chr21	45431272	45433225	Peak_1886	5828	.	22.9819	582.89	579.219	673
chr8	37962058	37964265	Peak_1887	5828	.	25.9432	582.839	579.168	825
chr1	234613649	234615350	Peak_1888	5826	.	17.8673	582.671	579.001	974
chr17	41399682	41401197	Peak_1889	5822	.	4.03506	582.288	578.618	989
chr6	5260467	5262120	Peak_1890	5822	.	23.697	582.278	578.608	929
chr21	45283806	45287690	Peak_1891	5821	.	25.869	582.121	578.451	1725
chr10	103892145	103894038	Peak_1892	5820	.	22.7394	582.003	578.333	487
chr4	154143302	154144711	Peak_1893	5820	.	24.3011	582.001	578.332	915
chr17	40713301	40724431	Peak_1894	5819	.	25.2476	581.944	578.274	1263
chr10	23726834	23729856	Peak_1895	5816	.	25.0216	581.637	577.967	2231
chr14	53161476	53162867	Peak_1896	5814	.	25.8979	581.405	577.736	780
chr16	89555486	89562282	Peak_1897	5814	.	25.8979	581.405	577.736	1241
chr20	1756993	1758380	Peak_1898	5814	.	25.8979	581.405	577.736	906
chr2	10587527	10589689	Peak_1899	5814	.	25.8979	581.405	577.736	594
chr7	33148190	33149543	Peak_1900	5814	.	25.8979	581.405	577.736	589
chr6	3068023	3070273	Peak_1901	5811	.	24.2228	581.176	577.508	975
chr6	158652494	158654794	Peak_1902	5810	.	23.4929	581.001	577.333	358
chr15	90644251	90646630	Peak_1903	5808	.	25.538	580.875	577.207	1382
chr20	49346363	49348998	Peak_1904	5806	.	25.7174	580.649	576.981	1952
chr2	27578981	27580794	Peak_1905	5804	.	25.4967	580.469	576.801	991
chr11	17297051	17299015	Peak_1906	5799	.	25.8525	579.971	576.304	899
chr13	25874769	25876498	Peak_1907	5799	.	25.8525	579.971	576.304	1330
chr16	53736724	53738592	Peak_1908	5799	.	25.8525	579.971	576.304	1442
chr17	3748593	3749924	Peak_1909	5799	.	25.8525	579.971	576.304	905
chr5	177554152	177559510	Peak_1910	5799	.	25.8525	579.971	576.304	4076
chr7	79081418	79084283	Peak_1911	5799	.	25.8525	579.971	576.304	1998
chr9	104160413	104161912	Peak_1912	5799	.	25.8525	579.971	576.304	968
chr9	86237417	86238914	Peak_1913	5799	.	25.8525	579.971	576.304	755
chr1	100314957	100316208	Peak_1914	5794	.	22.3581	579.446	575.78	618
chr11	65428557	65431578	Peak_1915	5785	.	25.8072	578.539	574.873	2237
chr15	44955103	44956477	Peak_1916	5785	.	25.8072	578.539	574.873	973
chr20	18547608	18548554	Peak_1917	5785	.	25.8072	578.539	574.873	523
chr7	43944688	43946703	Peak_1918	5785	.	25.8072	578.539	574.873	1390
chr7	5819618	5823290	Peak_1919	5785	.	25.8072	578.539	574.873	1326
chr1	231376155	231377758	Peak_1920	5782	.	16.8547	578.233	574.569	996
chr3	52443071	52444242	Peak_1921	5777	.	23.6358	577.78	574.116	798
chr18	33160654	33161432	Peak_1922	5777	.	18.0873	577.715	574.052	449
chr10	121410352	121412096	Peak_1923	5773	.	23.9502	577.318	573.655	1310
chr22	46464873	46471430	Peak_1924	5771	.	25.7618	577.107	573.443	3504
chr22	50942994	50946250	Peak_1925	5771	.	25.7618	577.107	573.443	2886
chr5	125929974	125931302	Peak_1926	5771	.	25.7618	577.107	573.443	759
chr6	146864098	146866552	Peak_1927	5771	.	25.7618	577.107	573.443	457
chr10	62492159	62494152	Peak_1928	5769	.	21.685	576.969	573.308	1044
chr6	18263916	18265397	Peak_1929	5762	.	25.0728	576.262	572.6	666
chr11	14379473	14383176	Peak_1930	5756	.	25.7165	575.675	572.014	996
chr12	42719367	42720304	Peak_1931	5756	.	25.7165	575.675	572.014	375
chr16	87899479	87905290	Peak_1932	5756	.	25.7165	575.675	572.014	3838
chr2	27650979	27652586	Peak_1933	5756	.	25.7165	575.675	572.014	749
chr3	160167009	160168434	Peak_1934	5756	.	25.7165	575.675	572.014	884
chr9	126691348	126693242	Peak_1935	5756	.	25.7165	575.675	572.014	852
chr16	11889188	11894083	Peak_1936	5742	.	25.6711	574.245	570.586	2294
chr2	84685652	84687072	Peak_1937	5742	.	25.6711	574.245	570.586	582
chr5	68462379	68464043	Peak_1938	5742	.	25.6711	574.245	570.586	796
chr15	80695859	80697891	Peak_1939	5740	.	24.2843	574.074	570.416	922
chr7	92076007	92077614	Peak_1940	5739	.	24.8465	573.989	570.331	880
chr3	9931690	9933018	Peak_1941	5736	.	23.09	573.689	570.031	787
chr15	80188493	80189939	Peak_1942	5735	.	22.989	573.509	569.851	892
chr8	100024006	100026102	Peak_1943	5735	.	25.4926	573.505	569.847	1182
chr3	158518781	158520675	Peak_1944	5728	.	24.9287	572.857	569.2	858
chr12	49450578	49455321	Peak_1945	5728	.	25.6258	572.815	569.158	3711
chr3	125092997	125094909	Peak_1946	5728	.	25.6258	572.815	569.158	945
chr5	41924883	41926695	Peak_1947	5728	.	25.6258	572.815	569.158	645
chr1	114471585	114473562	Peak_1948	5726	.	22.5016	572.689	569.034	500
chr9	72873013	72875996	Peak_1949	5723	.	24.491	572.325	568.67	1175
chr1	36861966	36864191	Peak_1950	5722	.	22.9646	572.291	568.635	1376
chr9	37903281	37905541	Peak_1951	5713	.	25.5804	571.386	567.731	1081
chr3	58290015	58293536	Peak_1952	5712	.	21.9819	571.287	567.633	2240
chr6	147523602	147526004	Peak_1953	5711	.	22.7822	571.186	567.532	1377
chrX	119384380	119385860	Peak_1954	5711	.	17.7241	571.133	567.479	538
chr14	32030383	32031150	Peak_1955	5705	.	22.6395	570.512	566.858	434
chr4	147096640	147097689	Peak_1956	5700	.	24.6487	570.037	566.384	422
chr1	16823728	16828558	Peak_1957	5699	.	25.535	569.958	566.305	1715
chr14	53257473	53259254	Peak_1958	5699	.	25.535	569.958	566.305	683
chr5	158689785	158690946	Peak_1959	5699	.	25.535	569.958	566.305	719
chr9	35602968	35606520	Peak_1960	5699	.	25.535	569.958	566.305	2583
chr17	46124574	46127170	Peak_1961	5698	.	24.1587	569.864	566.212	1250
chr1	202926642	202928077	Peak_1962	5696	.	22.2403	569.669	566.017	554
chr10	101768848	101770335	Peak_1963	5695	.	25.3875	569.517	565.866	649
chr6	84562543	84564184	Peak_1964	5685	.	25.4897	568.531	564.88	479
chr7	75676050	75678244	Peak_1965	5685	.	25.4897	568.531	564.88	1501
chr7	116592866	116594633	Peak_1966	5680	.	25.0369	568.05	564.4	986
chr22	20065498	20072992	Peak_1967	5678	.	24.1541	567.883	564.233	2528
chr16	30345688	30350207	Peak_1968	5675	.	23.75	567.501	563.852	687
chr1	22108742	22111430	Peak_1969	5671	.	25.4443	567.105	563.456	643
chr12	69978960	69980451	Peak_1970	5671	.	25.4443	567.105	563.456	477
chr14	36277594	36278765	Peak_1971	5671	.	25.4443	567.105	563.456	593
chr15	80214888	80217152	Peak_1972	5671	.	25.4443	567.105	563.456	944
chr19	41813740	41816887	Peak_1973	5671	.	25.4443	567.105	563.456	2505
chr3	39147596	39150083	Peak_1974	5661	.	25.3417	566.111	562.464	1235
chr12	64173167	64174471	Peak_1975	5661	.	24.4527	566.102	562.454	741
chr11	3012174	3016957	Peak_1976	5656	.	25.399	565.679	562.032	1100
chr14	97263400	97264676	Peak_1977	5656	.	25.399	565.679	562.032	580
chr17	27715051	27718590	Peak_1978	5656	.	25.399	565.679	562.032	2475
chr2	182756117	182757687	Peak_1979	5656	.	25.399	565.679	562.032	850
chr2	24148738	24151501	Peak_1980	5656	.	25.399	565.679	562.032	976
chr4	56212166	56213761	Peak_1981	5656	.	25.399	565.679	562.032	586
chr5	148930156	148931660	Peak_1982	5656	.	25.399	565.679	562.032	578
chr3	52803934	52806027	Peak_1983	5655	.	23.7441	565.52	561.874	813
chr7	135346005	135348852	Peak_1984	5655	.	21.5745	565.502	561.856	916
chr11	118400943	118407114	Peak_1985	5642	.	25.3536	564.254	560.609	655
chr2	191744819	191746993	Peak_1986	5642	.	25.3536	564.254	560.609	1527
chr4	1712358	1732073	Peak_1987	5642	.	25.3536	564.254	560.609	10444
chr4	1873101	1874276	Peak_1988	5642	.	25.3536	564.254	560.609	345
chr9	133454226	133455720	Peak_1989	5642	.	25.3536	564.254	560.609	933
chrX	119076865	119077921	Peak_1990	5640	.	18.8267	564.042	560.398	564
chr14	67825784	67827743	Peak_1991	5635	.	24.4883	563.546	559.903	1460
chr19	45679992	45684853	Peak_1992	5631	.	21.7635	563.149	559.506	1302
chr10	46167476	46169145	Peak_1993	5629	.	25.119	562.963	559.319	480
chr10	8091141	8094797	Peak_1994	5628	.	25.3083	562.83	559.187	1313
chr14	77842528	77844253	Peak_1995	5628	.	25.3083	562.83	559.187	721
chr19	47247450	47252397	Peak_1996	5628	.	25.3083	562.83	559.187	1990
chr19	16635657	16654243	Peak_1997	5622	.	21.304	562.229	558.588	17353
chrX	150564576	150566469	Peak_1998	5621	.	24.3512	562.158	558.517	1299
chr11	134145416	134148040	Peak_1999	5614	.	25.2629	561.406	557.765	534
chr20	35489976	35495712	Peak_2000	5614	.	25.2629	561.406	557.765	1669
chr2	69663854	69665983	Peak_2001	5614	.	25.2629	561.406	557.765	583
chr5	172195597	172199722	Peak_2002	5609	.	22.3731	560.925	557.285	2291
chrX	132089865	132095956	Peak_2003	5601	.	24.2501	560.162	556.522	2377
[truncated: 7,956 more rows]

## Sheet: Table S3B
Supplemental Table S3B. ZFX binding sites in HCT116
chr2	206949268	206951216	Peak_1	91324	.	243.116	9132.49	9124.23	1280
chr10	103453404	103455575	Peak_2	61013	.	97.206	6101.39	6094.37	682
chr3	150320733	150322016	Peak_3	46645	.	108.935	4664.55	4657.79	623
chr1	156736058	156738471	Peak_4	44463	.	97.4025	4446.3	4439.63	1441
chr14	31675811	31678063	Peak_5	41559	.	112.442	4155.94	4149.37	901
chr3	47204372	47206477	Peak_6	40503	.	108.431	4050.32	4043.82	533
chr12	53845636	53846782	Peak_7	39965	.	103.76	3996.52	3990.06	693
chr19	18942419	18943965	Peak_8	39458	.	120.401	3945.86	3939.42	536
chr17	60555313	60557482	Peak_9	38925	.	98.4782	3892.54	3886.13	1128
chr10	180386	182500	Peak_10	38453	.	120.808	3845.34	3838.95	1452
chr17	38136695	38137834	Peak_11	36465	.	92.9763	3646.57	3640.3	471
chr22	35653175	35654488	Peak_12	36271	.	71.8873	3627.16	3620.92	499
chr16	1358743	1360504	Peak_13	32859	.	98.7803	3285.96	3279.85	499
chr12	112545637	112547079	Peak_14	32579	.	90.9638	3257.99	3251.9	749
chr5	137687991	137689545	Peak_15	32395	.	115.389	3239.6	3233.51	674
chr17	60004516	60005625	Peak_16	30858	.	44.6661	3085.84	3079.82	584
chr22	41697309	41698994	Peak_17	30630	.	91.1979	3063.08	3057.07	1023
chr11	63606334	63607363	Peak_18	27454	.	61.3291	2745.41	2739.51	479
chr17	48784343	48785639	Peak_19	26728	.	59.496	2672.81	2666.94	830
chr7	128170398	128172609	Peak_20	23226	.	99.9263	2322.6	2316.83	1247
chr19	48893357	48894831	Peak_21	23087	.	61.9246	2308.76	2302.99	704
chr5	141487893	141489262	Peak_22	22577	.	65.8822	2257.76	2252	779
chr22	21921750	21923507	Peak_23	21170	.	57.0734	2117.01	2111.29	477
chr17	45265668	45266906	Peak_24	20056	.	35.3205	2005.63	1999.94	752
chr11	64883930	64885508	Peak_25	19795	.	55.228	1979.54	1973.86	976
chr10	116581125	116582702	Peak_26	19311	.	51.6051	1931.14	1925.48	720
chr7	148395309	148397154	Peak_27	18839	.	82.0228	1883.92	1878.28	950
chr12	56651268	56652711	Peak_28	18318	.	51.1599	1831.88	1826.27	688
chr6	90061673	90063062	Peak_29	18275	.	57.0999	1827.55	1821.94	499
chr7	129251059	129252679	Peak_30	18189	.	64.285	1818.94	1813.33	792
chr14	69618097	69619331	Peak_31	18132	.	51.5417	1813.29	1807.69	520
chr6	76311102	76313017	Peak_32	15786	.	51.5979	1578.61	1573.09	931
chrX	24167061	24168717	Peak_33	15779	.	79.5066	1577.95	1572.43	947
chr15	63794827	63798099	Peak_34	15667	.	59.9773	1566.7	1561.18	2240
chr2	162164565	162165660	Peak_35	15580	.	47.2817	1558.04	1552.52	589
chr19	16737911	16739167	Peak_36	15541	.	59.589	1554.1	1548.59	579
chr10	17243029	17244199	Peak_37	14919	.	41.2029	1491.95	1486.47	613
chr6	33755592	33757196	Peak_38	14632	.	52.7093	1463.28	1457.81	1015
chr20	62338160	62340213	Peak_39	14421	.	45.927	1442.1	1436.64	1020
chr8	59571145	59572814	Peak_40	14271	.	44.2788	1427.17	1421.72	1001
chr7	135194082	135195066	Peak_41	14247	.	48.4238	1424.73	1419.28	512
chr3	25704913	25707095	Peak_42	14087	.	46.5342	1408.74	1403.29	1043
chr12	74931277	74933344	Peak_43	13899	.	39.1332	1389.98	1384.55	450
chr11	47787586	47789709	Peak_44	13897	.	44.4335	1389.8	1384.36	1000
chr15	66585321	66587055	Peak_45	13657	.	62.3993	1365.72	1360.3	631
chr9	21334639	21335747	Peak_46	13366	.	46.1518	1336.65	1331.25	576
chr11	65292450	65293324	Peak_47	13189	.	44.7979	1318.97	1313.58	327
chr5	36875877	36877956	Peak_48	12842	.	61.5034	1284.29	1278.92	1658
chr16	58033583	58036213	Peak_49	12465	.	47.9276	1246.57	1241.23	818
chr8	38239081	38240906	Peak_50	12177	.	54.6824	1217.79	1212.45	392
chr4	89443839	89445630	Peak_51	12145	.	42.0124	1214.58	1209.24	964
chr16	66864165	66865282	Peak_52	11687	.	39.2874	1168.72	1163.41	481
chr17	11923824	11925303	Peak_53	11630	.	61.0342	1163.09	1157.79	645
chr11	64683632	64685028	Peak_54	11611	.	27.9359	1161.2	1155.9	1027
chr7	148958586	148960144	Peak_55	11395	.	30.9129	1139.53	1134.24	923
chr10	28820836	28823465	Peak_56	11247	.	37.1379	1124.7	1119.42	2169
chr1	154192444	154194396	Peak_57	11125	.	37.9103	1112.57	1107.3	1310
chr5	77071149	77072412	Peak_58	10734	.	38.0042	1073.4	1068.15	724
chr5	133511730	133512988	Peak_59	10578	.	45.1262	1057.86	1052.62	701
chr22	46067594	46068871	Peak_60	10494	.	35.2392	1049.46	1044.23	579
chr16	70284743	70286079	Peak_61	10319	.	37.2425	1031.9	1026.68	909
chr15	34501478	34502626	Peak_62	10310	.	44.2714	1031.08	1025.85	544
chr1	16693464	16694539	Peak_63	10059	.	28.2911	1005.96	1000.74	474
chr1	55680222	55681907	Peak_64	9997	.	39.2567	999.764	994.556	625
chr15	72765898	72768068	Peak_65	9900	.	31.3033	990.098	984.896	568
chr1	46766474	46769806	Peak_66	9834	.	38.4094	983.408	978.211	1952
chr15	59224957	59226401	Peak_67	9718	.	40.3487	971.883	966.694	566
chr11	66246611	66248140	Peak_68	9654	.	33.4008	965.405	960.221	1040
chr7	6413776	6415127	Peak_69	9647	.	42.1016	964.712	959.528	646
chr4	15656104	15657973	Peak_70	9610	.	40.1902	961.021	955.841	623
chr1	11072009	11073449	Peak_71	9434	.	37.2452	943.448	938.282	922
chr15	89877214	89878378	Peak_72	9425	.	38.7615	942.555	937.389	773
chr4	467035	468288	Peak_73	9403	.	31.7095	940.368	935.204	782
chr7	72935464	72936844	Peak_74	9363	.	38.9931	936.38	931.22	703
chr17	61851289	61852447	Peak_75	9361	.	34.3924	936.191	931.03	573
chr1	29507482	29508565	Peak_76	9267	.	34.122	926.72	921.568	563
chr3	138327067	138328397	Peak_77	9234	.	34.3391	923.402	918.252	646
chr10	94050439	94052111	Peak_78	9128	.	37.1685	912.8	907.662	724
chr20	21283464	21284658	Peak_79	9088	.	38.3814	908.813	903.679	654
chr1	6684830	6686124	Peak_80	9063	.	30.2173	906.344	901.213	618
chr5	135468243	135469361	Peak_81	9011	.	31.5813	901.112	895.986	486
chr11	16759725	16760948	Peak_82	8887	.	22.3754	888.799	883.689	628
chr13	21347148	21348490	Peak_83	8880	.	42.4423	888.042	882.932	601
chr2	160568451	160569840	Peak_84	8859	.	27.5783	885.995	880.887	753
chr17	80605346	80606517	Peak_85	8856	.	29.1194	885.639	880.531	741
chr2	27592580	27594444	Peak_86	8833	.	24.319	883.377	878.272	1208
chr5	180687621	180689186	Peak_87	8785	.	31.9101	878.561	873.461	1074
chr20	57225831	57227793	Peak_88	8770	.	30.1611	877.077	871.978	645
chr1	3712065	3713595	Peak_89	8698	.	32.6249	869.82	864.729	714
chr15	74907151	74909223	Peak_90	8678	.	28.4626	867.879	862.791	1069
chr7	138719544	138721546	Peak_91	8633	.	31.5166	863.373	858.289	1112
chr10	6130677	6132077	Peak_92	8631	.	32.6799	863.184	858.101	552
chr19	4123584	4124406	Peak_93	8569	.	38.1465	856.925	851.848	388
chr15	52860070	52861894	Peak_94	8502	.	37.0915	850.22	845.151	945
chr11	576205	577484	Peak_95	8501	.	31.6822	850.122	845.052	343
chr19	33182451	33184149	Peak_96	8480	.	33.4909	848.067	843	777
chr19	42746046	42748707	Peak_97	8470	.	27.951	847.053	841.988	602
chr10	65280338	65282196	Peak_98	8467	.	43.9007	846.713	841.648	1079
chr13	111805330	111806825	Peak_99	8464	.	28.6448	846.452	841.388	448
chr3	47843675	47845576	Peak_100	8450	.	36.3834	845.02	839.957	1071
chr8	144678625	144681730	Peak_101	8442	.	23.724	844.254	839.193	1739
chr17	38803380	38805119	Peak_102	8436	.	33.9421	843.648	838.587	479
chr11	107879374	107880768	Peak_103	8425	.	26.6065	842.588	837.529	513
chr18	72263708	72266164	Peak_104	8371	.	36.1067	837.112	832.06	887
chr8	103875099	103877242	Peak_105	8357	.	24.3035	835.711	830.662	1713
chr3	50395996	50397205	Peak_106	8339	.	27.6333	833.919	828.873	698
chr8	104310588	104311885	Peak_107	8274	.	29.7133	827.442	822.405	820
chr5	176559882	176562321	Peak_108	8222	.	38.2794	822.259	817.229	1359
chr11	14541060	14542202	Peak_109	8208	.	21.8803	820.856	815.828	660
chr1	206785252	206786237	Peak_110	8080	.	26.4278	808.037	803.025	445
chrX	54070091	54072104	Peak_111	8006	.	45.2576	800.691	795.688	488
chr14	75593084	75594374	Peak_112	7956	.	28.1119	795.625	790.629	483
chr15	45458454	45459861	Peak_113	7923	.	30.4861	792.304	787.311	545
chr16	24550626	24552201	Peak_114	7818	.	21.158	781.882	776.901	589
chr18	48494099	48495134	Peak_115	7800	.	29.6299	780.051	775.071	441
chr7	94536326	94537679	Peak_116	7796	.	33.1285	779.622	774.643	534
chr8	11141641	11142814	Peak_117	7769	.	33.2962	776.907	771.931	491
chr9	35071489	35072741	Peak_118	7741	.	28.3182	774.173	769.2	569
chr19	45003667	45004886	Peak_119	7680	.	31.4473	768.069	763.103	755
chr22	17639240	17641213	Peak_120	7664	.	27.406	766.429	761.465	1255
chr17	79603251	79604389	Peak_121	7642	.	19.2443	764.222	759.26	705
chr17	47438513	47439684	Peak_122	7618	.	22.9299	761.842	756.883	643
chr10	22629144	22630457	Peak_123	7615	.	28.787	761.595	756.636	545
chr20	2450761	2451696	Peak_124	7580	.	27.8926	758.047	753.092	539
chr1	40723011	40724691	Peak_125	7542	.	33.4939	754.232	749.283	476
chr14	54907295	54908356	Peak_126	7510	.	25.0753	751.018	746.072	564
chr10	98345763	98347343	Peak_127	7503	.	28.8052	750.38	745.435	706
chr19	8509604	8510870	Peak_128	7483	.	28.4181	748.328	743.384	530
chr5	78908193	78908939	Peak_129	7474	.	36.5858	747.446	742.504	319
chr1	29062783	29064552	Peak_130	7428	.	31.3104	742.86	737.924	920
chr6	116892000	116893138	Peak_131	7401	.	28.0329	740.111	735.179	636
chr12	53894124	53895633	Peak_132	7388	.	26.4955	738.847	733.916	1042
chr16	22308526	22309543	Peak_133	7321	.	25.2192	732.156	727.233	405
chr2	198363557	198365595	Peak_134	7302	.	26.4725	730.265	725.344	837
chr7	148892309	148894115	Peak_135	7270	.	29.6921	727.033	722.116	646
chr17	78518406	78519640	Peak_136	7258	.	18.8433	725.817	720.902	447
chr1	9294583	9295548	Peak_137	7247	.	33.7973	724.758	719.844	484
chr5	72793513	72795015	Peak_138	7245	.	27.0177	724.564	719.65	1081
chr1	38273046	38275016	Peak_139	7201	.	26.0218	720.183	715.274	545
chr7	92218883	92219948	Peak_140	7195	.	28.4495	719.544	714.636	679
chr16	85832268	85834101	Peak_141	7187	.	21.8795	718.772	713.866	659
chr17	5341802	5342727	Peak_142	7149	.	33.38	714.945	710.044	445
chr18	12376127	12377456	Peak_143	7131	.	27.4591	713.193	708.294	862
chr18	67955576	67957399	Peak_144	7081	.	31.9877	708.118	703.227	1256
chr8	94712273	94713762	Peak_145	7076	.	25.2196	707.634	702.743	813
chr13	42534519	42535855	Peak_146	7073	.	42.5903	707.399	702.508	787
chr1	29447726	29451829	Peak_147	7068	.	26.0673	706.803	701.913	1800
chr5	74161191	74162968	Peak_148	7066	.	34.2397	706.62	701.73	757
chr20	32699209	32700313	Peak_149	7061	.	22.1467	706.177	701.288	619
chr5	130499876	130501174	Peak_150	7001	.	25.6983	700.18	695.3	473
chr6	144163939	144165168	Peak_151	6997	.	21.8902	699.708	694.828	652
chr15	65424924	65426404	Peak_152	6989	.	27.8347	698.993	694.115	671
chr3	157827614	157828626	Peak_153	6984	.	36.5566	698.483	693.605	433
chr13	115000090	115001101	Peak_154	6982	.	29.6288	698.288	693.41	498
chr2	217362549	217364297	Peak_155	6972	.	27.0164	697.21	692.334	1160
chr20	44717608	44718860	Peak_156	6960	.	27.7579	696.068	691.193	771
chr11	46614737	46615861	Peak_157	6946	.	27.7323	694.606	689.734	630
chr17	79369702	79371753	Peak_158	6913	.	19.7773	691.389	686.521	1040
chr10	120839384	120841011	Peak_159	6905	.	19.1125	690.545	685.678	646
chr10	104179966	104182936	Peak_160	6799	.	17.8628	679.97	675.119	1177
chr9	130953136	130954507	Peak_161	6723	.	24.2421	672.316	667.475	695
chr9	139333267	139334636	Peak_162	6706	.	26.6982	670.686	665.847	760
chr12	2985446	2987118	Peak_163	6699	.	25.5754	669.967	665.13	560
chr11	130785612	130786672	Peak_164	6678	.	28.6606	667.886	663.051	603
chr16	19124731	19126722	Peak_165	6656	.	28.6203	665.623	660.793	855
chr2	85581008	85582547	Peak_166	6630	.	21.3312	663.003	658.177	983
chr19	11070456	11072452	Peak_167	6629	.	22.4617	662.941	658.114	717
chr11	11862717	11864558	Peak_168	6619	.	28.4649	661.981	657.156	1059
chr15	40225773	40227163	Peak_169	6602	.	32.7412	660.219	655.397	699
chr16	4320951	4322911	Peak_170	6585	.	25.268	658.592	653.773	1014
chr2	85197159	85199553	Peak_171	6547	.	22.2832	654.757	649.944	1986
chr20	57266926	57268868	Peak_172	6535	.	33.558	653.591	648.78	670
chr2	176045367	176046928	Peak_173	6525	.	25.7623	652.591	647.782	481
chr5	179050022	179052280	Peak_174	6509	.	23.2264	650.992	646.184	445
chr5	137088810	137091196	Peak_175	6506	.	24.9831	650.689	645.881	1024
chr2	105945667	105947009	Peak_176	6479	.	28.9714	647.999	643.195	723
chr5	68389557	68390543	Peak_177	6454	.	25.5902	645.455	640.655	416
chr3	122232889	122234046	Peak_178	6450	.	30.6473	645.087	640.288	712
chr7	148844165	148846262	Peak_179	6385	.	22.9296	638.587	633.797	575
chr20	3139539	3140817	Peak_180	6367	.	26.8531	636.705	631.917	798
chr8	99837192	99837961	Peak_181	6365	.	29.9425	636.536	631.749	470
chr14	95622768	95624880	Peak_182	6343	.	21.7874	634.398	629.614	1264
chr2	172290231	172291513	Peak_183	6337	.	24.5351	633.761	628.978	774
chr20	6102992	6104621	Peak_184	6312	.	20.2442	631.205	626.426	1019
chr5	176432695	176434055	Peak_185	6309	.	25.8879	630.948	626.17	858
chr1	24306139	24307558	Peak_186	6300	.	36.8852	630.024	625.247	504
chr7	73587960	73589538	Peak_187	6284	.	26.0176	628.445	623.67	767
chr15	68569459	68571360	Peak_188	6282	.	27.431	628.248	623.474	812
chr5	43556182	43557785	Peak_189	6253	.	27.3192	625.332	620.563	527
chr15	101834138	101836074	Peak_190	6242	.	25.2565	624.263	619.495	1011
chr3	33839845	33840867	Peak_191	6241	.	23.6718	624.109	619.341	376
chr2	99224450	99226296	Peak_192	6240	.	23.3554	624.071	619.303	754
chr2	18740963	18742233	Peak_193	6235	.	34.1827	623.507	618.74	740
chr2	64245418	64247205	Peak_194	6235	.	34.1442	623.507	618.74	1140
chr9	114245010	114246949	Peak_195	6218	.	30.1767	621.883	617.118	1416
chr11	808489	810583	Peak_196	6215	.	18.0841	621.565	616.801	981
chr11	33278399	33280536	Peak_197	6211	.	36.9352	621.196	616.433	706
chr19	33864039	33865391	Peak_198	6199	.	34.9376	619.916	615.154	840
chr1	200638451	200639638	Peak_199	6193	.	22.4421	619.397	614.636	439
chr11	85374841	85376402	Peak_200	6188	.	30.0797	618.878	614.117	1133
chr20	30310321	30311724	Peak_201	6158	.	27.0795	615.804	611.048	894
chr11	67350997	67352233	Peak_202	6121	.	23.9675	612.12	607.371	325
chr7	39988708	39991752	Peak_203	6083	.	26.1375	608.383	603.639	2368
chr12	54718739	54719487	Peak_204	6052	.	27.5955	605.289	600.551	357
chrX	21857450	21858533	Peak_205	6046	.	34.945	604.616	599.878	551
chr10	88280584	88282327	Peak_206	6038	.	27.5662	603.828	599.091	1287
chr16	48277962	48279280	Peak_207	6009	.	23.6837	600.967	596.235	574
chr2	9614059	9615694	Peak_208	6004	.	31.9055	600.448	595.717	788
chr18	9102210	9103392	Peak_209	6003	.	21.9545	600.337	595.606	686
chr16	67926944	67928226	Peak_210	6000	.	27.9196	600.048	595.317	470
chr11	94276680	94277917	Peak_211	5978	.	20.0571	597.866	593.139	544
chr16	89573869	89575742	Peak_212	5965	.	18.8639	596.524	591.799	1120
chr17	80476822	80478672	Peak_213	5959	.	24.1885	595.98	591.256	458
chr10	123733809	123735100	Peak_214	5948	.	18.5904	594.869	590.146	682
chr2	183902074	183903511	Peak_215	5947	.	31.3234	594.75	590.028	715
chr21	47705545	47706448	Peak_216	5946	.	30.3504	594.695	589.972	382
chr3	128901813	128903549	Peak_217	5935	.	21.7849	593.562	588.841	1163
chr15	57024912	57026229	Peak_218	5922	.	29.7828	592.283	587.564	552
chr6	89855399	89856707	Peak_219	5920	.	26.3132	592.014	587.296	684
chr11	126173393	126174401	Peak_220	5882	.	27.9609	588.219	583.507	462
chr4	22516802	22518237	Peak_221	5878	.	25.9463	587.83	583.119	617
chr10	105726508	105727839	Peak_222	5875	.	25.059	587.522	582.811	675
chr2	223725533	223726548	Peak_223	5854	.	24.5815	585.497	580.789	392
chr1	16970697	16972238	Peak_224	5851	.	9.16369	585.183	580.476	601
chr21	43299053	43300175	Peak_225	5781	.	29.7698	578.164	573.469	710
chr19	57791056	57792662	Peak_226	5771	.	21.4761	577.164	572.47	909
chr20	25676551	25677741	Peak_227	5761	.	29.8719	576.121	571.429	753
chr3	124930636	124932209	Peak_228	5742	.	27.8942	574.244	569.555	657
chr8	87526514	87527506	Peak_229	5731	.	21.7725	573.144	568.457	466
chr16	66729401	66731181	Peak_230	5708	.	24.8484	570.849	566.166	785
chr4	128981682	128983677	Peak_231	5705	.	30.653	570.552	565.869	437
chr19	30205705	30207390	Peak_232	5697	.	18.63	569.755	565.073	617
chr2	43036845	43037842	Peak_233	5677	.	23.4262	567.78	563.102	643
chr1	146714020	146715356	Peak_234	5658	.	23.9924	565.846	561.172	610
chr16	69345056	69346097	Peak_235	5635	.	26.7182	563.596	558.925	382
chr17	29297711	29299086	Peak_236	5635	.	18.8705	563.558	558.887	570
chr12	6492585	6494461	Peak_237	5601	.	22.5075	560.19	555.525	776
chr14	24422304	24423667	Peak_238	5586	.	20.8945	558.613	553.95	845
chr16	2801467	2803627	Peak_239	5586	.	20.8733	558.613	553.95	968
chr11	74204106	74205404	Peak_240	5553	.	24.3673	555.334	550.677	415
chr20	62586785	62588986	Peak_241	5524	.	22.5382	552.456	547.804	826
chr17	80022699	80024311	Peak_242	5512	.	17.1276	551.235	546.585	787
chr11	109962661	109964919	Peak_243	5500	.	32.6499	550.057	545.408	1720
chr3	51428332	51430172	Peak_244	5496	.	27.3947	549.633	544.985	616
chr9	139622000	139623827	Peak_245	5495	.	23.8778	549.519	544.872	509
chr9	102860546	102862336	Peak_246	5489	.	21.0525	548.967	544.32	1189
chr16	4674545	4675776	Peak_247	5489	.	19.3158	548.917	544.27	425
chr16	15068791	15069701	Peak_248	5473	.	12.8588	547.343	542.699	348
chr3	15247472	15248863	Peak_249	5466	.	20.5553	546.628	541.984	543
chr14	74252586	74254556	Peak_250	5462	.	28.1126	546.216	541.574	1206
chr5	132298145	132300172	Peak_251	5459	.	26.5469	545.948	541.306	886
chr1	33116504	33117642	Peak_252	5434	.	23.3166	543.469	538.831	486
chr19	41769922	41771146	Peak_253	5432	.	23.1095	543.267	538.629	563
chr2	75873362	75874686	Peak_254	5428	.	19.8981	542.804	538.167	698
chr17	66031687	66032577	Peak_255	5379	.	19.8701	537.978	533.348	402
chr9	138391348	138393323	Peak_256	5368	.	21.1947	536.887	532.259	1237
chr2	54342289	54343106	Peak_257	5360	.	20.3009	536.023	531.396	349
chr1	90460359	90461406	Peak_258	5352	.	23.0446	535.268	530.642	561
chr5	107716232	107718396	Peak_259	5332	.	29.6626	533.298	528.676	878
chr9	19048839	19050083	Peak_260	5328	.	21.41	532.88	528.258	775
chr17	79827119	79830459	Peak_261	5324	.	16.0386	532.409	527.787	2519
chr4	110354245	110356134	Peak_262	5322	.	27.9256	532.219	527.598	931
chr17	20944920	20946539	Peak_263	5319	.	34.0923	531.968	527.348	1170
chr13	27825451	27826412	Peak_264	5318	.	22.2	531.84	527.219	383
chr7	73096862	73098510	Peak_265	5316	.	17.4465	531.681	527.061	641
chr6	74229775	74230982	Peak_266	5309	.	21.7212	530.954	526.335	756
chr12	27932483	27934340	Peak_267	5300	.	26.0887	530.029	525.412	880
chr17	80054474	80058402	Peak_268	5293	.	17.5399	529.367	524.751	1344
chr14	89029136	89030064	Peak_269	5284	.	21.0761	528.474	523.86	472
chr20	3026266	3027808	Peak_270	5283	.	23.5014	528.385	523.77	616
chr16	67449643	67450653	Peak_271	5278	.	22.2655	527.853	523.239	576
chr19	14628337	14630020	Peak_272	5262	.	20.521	526.211	521.601	671
chr9	4740449	4741998	Peak_273	5260	.	24.9607	526.048	521.438	616
chr8	41908367	41910080	Peak_274	5249	.	34.5643	524.936	520.328	1017
chr7	140396011	140397423	Peak_275	5242	.	22.7116	524.241	519.635	738
chr2	29117182	29118414	Peak_276	5241	.	21.532	524.195	519.588	667
chr7	149156297	149158247	Peak_277	5222	.	30.9704	522.253	517.65	821
chr11	118660897	118663355	Peak_278	5201	.	21.3902	520.148	515.55	535
chr2	162101038	162101988	Peak_279	5190	.	23.2179	519.039	514.443	431
chr3	182697554	182698992	Peak_280	5178	.	29.6862	517.853	513.259	556
chr16	89939173	89940423	Peak_281	5173	.	14.6027	517.34	512.747	459
chr17	73892218	73893289	Peak_282	5151	.	16.5566	515.183	510.594	661
chr20	34251749	34253031	Peak_283	5148	.	19.5971	514.885	510.297	784
chr17	62961723	62962544	Peak_284	5142	.	14.973	514.259	509.672	355
chr7	149193677	149195307	Peak_285	5136	.	26.2839	513.625	509.039	952
chr22	50764708	50766485	Peak_286	5132	.	21.7785	513.245	508.66	1071
chr13	53024072	53025056	Peak_287	5128	.	23.5691	512.896	508.311	502
chr1	87169639	87171314	Peak_288	5128	.	18.8127	512.818	508.233	1111
chr10	104209648	104211082	Peak_289	5104	.	16.781	510.484	505.904	987
chr16	29624171	29626566	Peak_290	5081	.	32.5806	508.168	503.592	1045
chr13	113862267	113864691	Peak_291	5078	.	21.6064	507.828	503.253	901
chr6	157097935	157101229	Peak_292	5076	.	33.771	507.69	503.115	2743
chr2	175112486	175113930	Peak_293	5075	.	17.5867	507.524	502.95	576
chr17	36981161	36982493	Peak_294	5075	.	21.8328	507.521	502.946	630
chr16	84732905	84734415	Peak_295	5072	.	19.2566	507.225	502.651	1006
chr6	17705867	17707374	Peak_296	5072	.	27.1058	507.207	502.633	528
chr7	100486451	100488203	Peak_297	5069	.	22.2447	506.905	502.331	616
chr2	217276829	217277992	Peak_298	5064	.	22.1993	506.433	501.86	427
chr14	24898423	24900034	Peak_299	5063	.	19.994	506.378	501.805	851
chr6	146135192	146136531	Peak_300	5046	.	32.7324	504.608	500.039	443
chr11	8985034	8986856	Peak_301	5044	.	20.4158	504.469	499.9	1165
chr3	142719363	142721187	Peak_302	5031	.	19.4318	503.191	498.625	1258
chr6	158243532	158245399	Peak_303	5025	.	31.1662	502.55	497.985	847
chr22	38900890	38903087	Peak_304	5025	.	23.9125	502.524	497.959	933
chr15	75870452	75872231	Peak_305	4989	.	25.2574	498.994	494.436	580
chr10	91173934	91175410	Peak_306	4983	.	22.329	498.367	493.809	882
chr15	91072357	91074173	Peak_307	4977	.	29.0898	497.737	493.181	1082
chr10	127584081	127585514	Peak_308	4968	.	12.6861	496.867	492.312	768
chr17	65362010	65362887	Peak_309	4965	.	16.0914	496.58	492.026	452
chr7	765626	767096	Peak_310	4964	.	26.5153	496.485	491.931	885
chr2	20549713	20551493	Peak_311	4951	.	25.3887	495.15	490.599	491
chr3	101292444	101293901	Peak_312	4948	.	18.3764	494.846	490.295	865
chr12	69863750	69864816	Peak_313	4943	.	21.2375	494.343	489.792	488
chr1	223899469	223901956	Peak_314	4940	.	16.9262	494.002	489.453	715
chr16	88600455	88602011	Peak_315	4919	.	17.6399	491.929	487.383	429
chr19	2150648	2151720	Peak_316	4903	.	19.909	490.374	485.832	629
chr10	115613564	115615935	Peak_317	4896	.	17.1507	489.697	485.156	1117
chr7	98475787	98477191	Peak_318	4894	.	23.7312	489.445	484.904	641
chr2	201676434	201677602	Peak_319	4885	.	21.1048	488.585	484.046	450
chr16	89626429	89628367	Peak_320	4885	.	14.5163	488.526	483.987	935
chr6	170151098	170152693	Peak_321	4876	.	22.3406	487.668	483.13	787
chr14	50998374	50999839	Peak_322	4876	.	21.0162	487.63	483.093	642
chr15	78729307	78731338	Peak_323	4876	.	19.0078	487.602	483.064	1532
chr3	47866032	47867317	Peak_324	4875	.	15.6158	487.525	482.988	583
chr9	21993101	21996548	Peak_325	4874	.	20.2507	487.447	482.91	2898
chr8	99305631	99306926	Peak_326	4863	.	14.8809	486.392	481.857	740
chr17	66254927	66255814	Peak_327	4862	.	16.1442	486.265	481.73	452
chr4	171010690	171011687	Peak_328	4857	.	27.7408	485.784	481.25	486
chr16	2009017	2012287	Peak_329	4847	.	18.5176	484.761	480.229	566
chr3	51572229	51573882	Peak_330	4846	.	22.1487	484.658	480.127	631
chr9	37799964	37801784	Peak_331	4846	.	21.5243	484.611	480.08	1161
chr16	88850336	88852420	Peak_332	4839	.	16.0551	483.92	479.39	1049
chr5	72111774	72113285	Peak_333	4830	.	23.2503	483.017	478.489	515
chr14	45553083	45554003	Peak_334	4822	.	20.8441	482.275	477.749	457
chr4	103421637	103423517	Peak_335	4814	.	22.9619	481.427	476.902	1236
chr12	32831504	32833064	Peak_336	4809	.	20.8195	480.939	476.415	949
chr1	229693553	229695465	Peak_337	4807	.	25.6742	480.794	476.271	574
chr11	62493629	62495465	Peak_338	4800	.	20.2552	480.079	475.557	781
chr20	62288710	62290665	Peak_339	4798	.	18.7958	479.849	475.328	739
chr17	59487956	59490553	Peak_340	4784	.	16.4786	478.452	473.934	837
chr3	128722020	128723114	Peak_341	4781	.	24.1923	478.161	473.644	660
chr14	69864209	69865964	Peak_342	4774	.	20.1842	477.434	472.918	539
chr2	32502706	32503639	Peak_343	4772	.	19.5255	477.262	472.746	421
chr16	30620732	30621847	Peak_344	4760	.	17.9797	476.047	471.534	637
chr16	70557572	70558358	Peak_345	4759	.	22.7915	475.906	471.393	343
chr3	179040256	179041869	Peak_346	4754	.	19.5961	475.476	470.965	1251
chr7	40173579	40175000	Peak_347	4754	.	19.5961	475.476	470.965	424
chr12	125051029	125052898	Peak_348	4741	.	25.6851	474.105	469.596	849
chr5	154133326	154137141	Peak_349	4727	.	24.8055	472.743	468.237	1036
chr10	126847118	126849050	Peak_350	4715	.	19.4822	471.553	467.05	535
chr8	21905841	21907035	Peak_351	4714	.	21.115	471.411	466.908	611
chr10	97802714	97804297	Peak_352	4712	.	25.5832	471.237	466.735	702
chr17	15902141	15903960	Peak_353	4712	.	21.1234	471.233	466.731	1152
chr12	113622491	113623991	Peak_354	4712	.	23.5347	471.209	466.707	541
chr20	42086314	42087288	Peak_355	4698	.	21.0722	469.891	465.391	469
chr8	97273325	97275088	Peak_356	4698	.	16.0803	469.854	465.355	348
chr3	64008256	64009433	Peak_357	4696	.	25.6371	469.617	465.119	711
chr6	52441308	52442631	Peak_358	4691	.	23.8112	469.102	464.604	880
chr18	32923592	32924756	Peak_359	4684	.	24.6437	468.492	463.996	611
chr7	56031834	56033024	Peak_360	4684	.	24.6437	468.492	463.996	646
chr11	32913712	32915858	Peak_361	4680	.	29.0432	468.043	463.548	1208
chr8	42995130	42996732	Peak_362	4678	.	24.1274	467.859	463.364	804
chr7	32529334	32530247	Peak_363	4669	.	18.4778	466.993	462.5	521
chr15	78555792	78557700	Peak_364	4645	.	21.6135	464.52	460.032	864
chr3	43731671	43733214	Peak_365	4640	.	19.3059	464.06	459.573	766
chr10	123686872	123688359	Peak_366	4637	.	15.9437	463.772	459.286	588
chr12	69633017	69634365	Peak_367	4635	.	18.7585	463.533	459.047	650
chr11	66383233	66384440	Peak_368	4633	.	20.0132	463.397	458.912	508
chr5	138940244	138941993	Peak_369	4631	.	23.4827	463.101	458.616	1298
chr2	225448929	225450214	Peak_370	4630	.	22.8237	463.067	458.583	681
chr19	30432956	30434132	Peak_371	4621	.	23.596	462.117	457.634	686
chr4	103996973	103998232	Peak_372	4620	.	18.7645	462.076	457.593	737
chr5	134733842	134735505	Peak_373	4620	.	18.7645	462.076	457.593	769
chr19	1437979	1439123	Peak_374	4611	.	19.209	461.128	456.647	592
chr3	126373196	126374178	Peak_375	4609	.	20.2293	460.99	456.51	492
chr3	128206378	128209204	Peak_376	4608	.	19.808	460.872	456.393	1974
chr15	38746107	38747016	Peak_377	4607	.	18.7206	460.787	456.307	356
chr21	34915032	34916156	Peak_378	4605	.	18.287	460.595	456.116	528
chr12	49109843	49111114	Peak_379	4593	.	18.2658	459.317	454.841	460
chr16	9183869	9186721	Peak_380	4578	.	25.6377	457.857	453.385	1953
chr6	42858037	42858763	Peak_381	4563	.	18.2877	456.309	451.841	310
chr5	141348397	141349485	Peak_382	4561	.	22.5895	456.179	451.711	473
chr17	49337722	49338733	Peak_383	4558	.	14.2515	455.877	451.41	433
chr5	171432364	171434411	Peak_384	4552	.	20.1171	455.289	450.823	1053
chr3	49058003	49060761	Peak_385	4549	.	16.6479	454.911	450.445	799
chr1	180471063	180472444	Peak_386	4543	.	17.3254	454.334	449.87	766
chr1	23669926	23671463	Peak_387	4540	.	28.1689	454.094	449.63	547
chr4	24913613	24915082	Peak_388	4539	.	27.1511	453.98	449.516	796
chr10	7829552	7831202	Peak_389	4529	.	18.075	452.944	448.483	782
chr11	125438958	125439972	Peak_390	4526	.	25.7556	452.605	448.144	490
chr16	47006681	47008194	Peak_391	4525	.	20.5343	452.517	448.056	773
chr20	32890151	32891645	Peak_392	4521	.	19.1045	452.185	447.726	500
chr1	109505237	109506309	Peak_393	4520	.	22.4431	452.058	447.598	593
chr18	19192013	19192885	Peak_394	4519	.	21.7303	451.993	447.533	501
chr5	137910452	137911379	Peak_395	4510	.	21.3508	451.047	446.589	426
chr3	156877043	156878714	Peak_396	4506	.	22.4138	450.686	446.229	1104
chr22	50638470	50640584	Peak_397	4499	.	22.8225	449.915	445.461	1279
chr1	35657415	35658964	Peak_398	4491	.	24.1843	449.134	444.681	606
chr22	31742692	31743919	Peak_399	4485	.	21.8829	448.517	444.065	640
chr15	67812995	67814384	Peak_400	4471	.	16.8031	447.121	442.672	742
chr2	198380421	198381514	Peak_401	4471	.	16.7839	447.121	442.672	524
chr20	2082051	2084465	Peak_402	4465	.	16.9953	446.543	442.095	1544
chr19	46806424	46807487	Peak_403	4458	.	16.7647	445.882	441.436	691
chr2	58273016	58274668	Peak_404	4455	.	18.7536	445.591	441.145	909
chr15	31283121	31284583	Peak_405	4436	.	22.7514	443.695	439.253	938
chr20	50807488	50808949	Peak_406	4432	.	22.1164	443.261	438.82	568
chr16	67225806	67226919	Peak_407	4432	.	19.6318	443.248	438.807	415
chr2	75937455	75938492	Peak_408	4427	.	17.8206	442.789	438.35	394
chr9	136241941	136243729	Peak_409	4409	.	23.3413	440.955	436.519	851
chr14	75229807	75230661	Peak_410	4409	.	26.8795	440.939	436.503	347
chr6	2764938	2766971	Peak_411	4400	.	20.7321	440.096	435.662	981
chr17	78427602	78429335	Peak_412	4394	.	13.1074	439.464	435.032	769
chr1	17287086	17287906	Peak_413	4381	.	21.0802	438.134	433.705	400
chr8	9413280	9414322	Peak_414	4380	.	19.7335	438.059	433.63	355
chr6	41040593	41041647	Peak_415	4376	.	21.2805	437.621	433.193	412
chr5	147763314	147764257	Peak_416	4368	.	22.5381	436.808	432.382	358
chr10	45495792	45497167	Peak_417	4365	.	23.6912	436.504	432.078	739
chr3	57541231	57542869	Peak_418	4353	.	16.3958	435.359	430.935	917
chr9	140099197	140100845	Peak_419	4352	.	17.6086	435.209	430.786	1114
chr10	103815257	103816379	Peak_420	4350	.	14.0293	435.025	430.602	635
chr22	40389694	40392289	Peak_421	4346	.	19.4178	434.693	430.271	1551
chr14	90797252	90798525	Peak_422	4345	.	26.2704	434.532	430.11	794
chr11	61196704	61197995	Peak_423	4334	.	20.5182	433.429	429.009	485
chr20	33412311	33413743	Peak_424	4333	.	24.9207	433.359	428.94	962
chr16	1524430	1525974	Peak_425	4329	.	18.8837	432.98	428.562	850
chr9	34328757	34330375	Peak_426	4328	.	16.1077	432.813	428.395	430
chr3	141120515	141121968	Peak_427	4326	.	24.1685	432.664	428.246	498
chr11	74459657	74460888	Peak_428	4323	.	21.523	432.301	427.885	755
chr1	117908834	117910426	Peak_429	4320	.	25.5234	432.052	427.635	846
chr2	24345932	24347156	Peak_430	4314	.	18.3437	431.457	427.042	587
chr10	121631388	121633203	Peak_431	4309	.	13.2701	430.975	426.561	708
chr1	197871208	197872381	Peak_432	4299	.	19.8088	429.939	425.527	568
chr10	120863526	120864554	Peak_433	4291	.	21.6528	429.129	424.719	319
chr7	131012261	131013387	Peak_434	4291	.	17.0422	429.116	424.706	619
chr3	10182824	10184379	Peak_435	4275	.	22.3357	427.54	423.134	919
chr4	85886588	85888065	Peak_436	4263	.	25.96	426.387	421.983	704
chr15	65822563	65823720	Peak_437	4263	.	17.7545	426.306	421.903	380
chr7	23338686	23339617	Peak_438	4260	.	19.6889	426.082	421.679	381
chr16	84149831	84151538	Peak_439	4257	.	16.5916	425.725	421.323	464
chr2	48009715	48011367	Peak_440	4252	.	18.6473	425.24	420.839	782
chr4	1856853	1859015	Peak_441	4249	.	21.234	425	420.599	918
chr2	133104802	133105627	Peak_442	4249	.	11.115	424.972	420.572	329
chr12	21809814	21811516	Peak_443	4247	.	19.6633	424.769	420.369	674
chr15	65902524	65904669	Peak_444	4245	.	22.285	424.598	420.199	846
chr15	34330386	34331638	Peak_445	4244	.	25.8106	424.425	420.026	741
chr5	98263577	98265557	Peak_446	4244	.	25.8106	424.425	420.026	575
chr12	108154138	108155360	Peak_447	4242	.	20.321	424.296	419.897	641
chr16	4816506	4817526	Peak_448	4239	.	18.6	423.953	419.555	493
chr9	33816441	33818296	Peak_449	4236	.	24.7946	423.694	419.296	1272
chr11	46866863	46868128	Peak_450	4236	.	17.765	423.682	419.284	714
chr10	25011483	25013676	Peak_451	4231	.	27.0902	423.177	418.78	707
chr7	105752036	105753346	Peak_452	4226	.	18.5527	422.667	418.271	551
chr9	71650391	71651407	Peak_453	4226	.	24.5421	422.653	418.258	411
chr3	182510654	182512215	Peak_454	4222	.	22.9288	422.299	417.904	957
chr20	47662184	47663819	Peak_455	4219	.	17.0146	421.924	417.53	999
chr1	6258905	6259942	Peak_456	4216	.	18.7829	421.63	417.237	548
chr1	63153091	63154400	Peak_457	4204	.	19.982	420.404	416.013	758
chr20	3800186	3801525	Peak_458	4203	.	18.7346	420.339	415.949	666
chr21	35013321	35014552	Peak_459	4195	.	19.484	419.529	415.141	588
chr7	2394221	2395271	Peak_460	4191	.	22.2023	419.184	414.797	494
chr5	133339328	133341535	Peak_461	4174	.	17.5349	417.469	413.086	779
chr18	158128	159169	Peak_462	4172	.	29.2441	417.284	412.901	599
chr7	148822561	148824348	Peak_463	4165	.	15.3988	416.52	412.138	674
chr8	146052011	146054260	Peak_464	4163	.	12.8506	416.311	411.93	1130
chr11	126151961	126153659	Peak_465	4161	.	17.9111	416.159	411.779	1060
chr22	17517287	17519111	Peak_466	4158	.	23.5196	415.833	411.453	1042
chr9	117349775	117350777	Peak_467	4153	.	13.8268	415.38	411.001	388
chr4	120987247	120988629	Peak_468	4149	.	24.8212	414.92	410.542	495
chr2	136498982	136500341	Peak_469	4148	.	17.8656	414.89	410.512	680
chr3	132378094	132379786	Peak_470	4148	.	19.9035	414.884	410.507	1137
chr3	160282123	160284029	Peak_471	4147	.	20.8897	414.784	410.407	740
chr8	144717611	144718963	Peak_472	4147	.	15.0051	414.737	410.36	807
chr19	29703331	29704389	Peak_473	4146	.	23.3767	414.696	410.319	521
chr10	89577197	89578210	Peak_474	4142	.	16.6528	414.22	409.844	530
chr17	61626923	61628555	Peak_475	4140	.	12.8096	414.075	409.699	455
chr16	698156	700662	Peak_476	4140	.	27.9121	414.028	409.653	889
chr17	8338951	8340026	Peak_477	4139	.	19.599	413.934	409.559	481
chr7	105161891	105163337	Peak_478	4135	.	20.2795	413.55	409.176	567
chr10	103824800	103826464	Peak_479	4133	.	13.3733	413.304	408.931	578
chr4	99181310	99182427	Peak_480	4130	.	20.4449	413.009	408.635	775
chr2	676964	677864	Peak_481	4130	.	19.2791	413.001	408.627	355
chr16	14723358	14724693	Peak_482	4129	.	16.6118	412.984	408.611	568
chrX	57618259	57619518	Peak_483	4127	.	29.0574	412.787	408.414	575
chr19	47615198	47616580	Peak_484	4124	.	23.8481	412.452	408.08	811
chr6	170615141	170616365	Peak_485	4122	.	20.2519	412.223	407.852	799
chr10	88470454	88472360	Peak_486	4116	.	19.2279	411.698	407.328	766
chr11	118964568	118966364	Peak_487	4114	.	16.9515	411.408	407.038	1309
chr11	107992018	107993114	Peak_488	4109	.	20.0141	410.976	406.608	490
chr11	2420680	2422653	Peak_489	4105	.	18.1693	410.55	406.183	1458
chr11	12398923	12400105	Peak_490	4097	.	21.6594	409.799	405.434	732
chr22	20861478	20862637	Peak_491	4089	.	14.9238	408.985	404.622	459
chr3	184016546	184017704	Peak_492	4082	.	21.7283	408.218	403.857	690
chr12	46383390	46385310	Peak_493	4080	.	20.6882	408.091	403.73	664
chr8	145114494	145116252	Peak_494	4077	.	14.6841	407.713	403.353	891
chr9	110045425	110046701	Peak_495	4067	.	21.2222	406.756	402.398	711
chr2	219432426	219434384	Peak_496	4066	.	17.518	406.647	402.29	1451
chr1	243418721	243419950	Peak_497	4064	.	19.0485	406.495	402.138	847
chr13	111357889	111358901	Peak_498	4063	.	20.2213	406.368	402.011	472
chr10	38382997	38384389	Peak_499	4063	.	17.6412	406.333	401.976	394
chr11	35683978	35685337	Peak_500	4062	.	18.3004	406.203	401.847	632
chr10	6205343	6206589	Peak_501	4057	.	21.5365	405.729	401.374	606
chr20	34329346	34330818	Peak_502	4054	.	14.8535	405.429	401.075	610
chr15	83478156	83479564	Peak_503	4046	.	18.3927	404.677	400.324	465
chr17	80375922	80376954	Peak_504	4045	.	17.1948	404.586	400.233	549
chr10	94332841	94334430	Peak_505	4044	.	19.6477	404.496	400.144	710
chr1	182360038	182361895	Peak_506	4044	.	18.5366	404.442	400.09	682
chr16	1143415	1145318	Peak_507	4039	.	17.5226	403.968	399.617	463
chr11	47586646	47588015	Peak_508	4034	.	17.9616	403.485	399.135	640
chr1	52607304	52608753	Peak_509	4034	.	17.9852	403.485	399.135	912
chr1	41706767	41708744	Peak_510	4034	.	24.9994	403.442	399.092	769
chr16	56458421	56459897	Peak_511	4033	.	22.668	403.385	399.035	670
chr12	120971962	120973064	Peak_512	4029	.	19.9478	402.96	398.612	351
chr11	43702003	43703097	Peak_513	4022	.	17.9379	402.214	397.867	479
chr2	170683779	170685012	Peak_514	4007	.	23.6953	400.752	396.409	498
chr2	97522752	97524702	Peak_515	4006	.	14.7305	400.699	396.356	837
chr16	31519268	31520321	Peak_516	4003	.	24.5679	400.347	396.005	647
chr15	101458163	101460466	Peak_517	4002	.	22.0552	400.288	395.946	1363
chr21	34142999	34144356	Peak_518	4002	.	16.6547	400.244	395.902	893
chr20	16709987	16711294	Peak_519	3999	.	17.0299	399.926	395.586	787
chr20	57616865	57618119	Peak_520	3997	.	19.9978	399.752	395.411	778
chr6	28109411	28110137	Peak_521	3987	.	15.8776	398.777	394.439	359
chr7	155436578	155438168	Peak_522	3974	.	18.7668	397.427	393.093	985
chr2	128144662	128145939	Peak_523	3971	.	25.6141	397.175	392.841	624
chr3	57261302	57262672	Peak_524	3959	.	18.2374	395.923	391.592	782
chr17	61522876	61525648	Peak_525	3957	.	13.8588	395.723	391.393	998
chr2	239110844	239112999	Peak_526	3954	.	19.1578	395.49	391.16	1186
chr6	43138848	43140436	Peak_527	3954	.	19.1844	395.49	391.16	414
chr1	8021187	8022356	Peak_528	3953	.	17.6977	395.303	390.974	745
chr19	34662674	34664430	Peak_529	3951	.	15.7983	395.135	390.806	424
chr14	75517431	75518356	Peak_530	3947	.	15.4704	394.771	390.443	502
chr20	48329486	48331232	Peak_531	3936	.	18.4807	393.699	389.374	729
chr18	12407512	12408824	Peak_532	3935	.	21.8021	393.511	389.186	586
chr12	112856162	112857519	Peak_533	3933	.	21.1408	393.331	389.007	736
chr5	179159665	179160964	Peak_534	3933	.	20.923	393.315	388.991	435
chr19	10216792	10217937	Peak_535	3929	.	15.1017	392.994	388.67	402
chr7	74488485	74489813	Peak_536	3928	.	19.0781	392.888	388.565	844
chr12	67661984	67664362	Peak_537	3925	.	20.3353	392.589	388.266	759
chr11	13689535	13691113	Peak_538	3920	.	24.4615	392.073	387.752	1017
chr3	49976949	49978239	Peak_539	3914	.	16.7049	391.467	387.148	772
chr7	12250473	12251997	Peak_540	3912	.	16.7664	391.221	386.903	654
chr20	277773	279295	Peak_541	3908	.	20.9832	390.882	386.564	670
chr3	141456762	141457982	Peak_542	3908	.	17.5833	390.813	386.495	633
chr1	116960584	116961653	Peak_543	3903	.	14.7479	390.313	385.997	571
chr16	2254762	2256454	Peak_544	3894	.	18.8352	389.424	385.11	833
chr15	65476607	65478030	Peak_545	3893	.	16.5532	389.388	385.074	806
chr16	11835919	11837563	Peak_546	3893	.	20.5915	389.308	384.995	506
chr16	89159966	89161102	Peak_547	3892	.	15.0673	389.296	384.982	477
chr5	54602738	54603849	Peak_548	3889	.	23.1144	388.978	384.665	543
chr7	32767483	32768753	Peak_549	3878	.	24.2694	387.828	383.518	575
chr15	48623087	48624101	Peak_550	3874	.	18.9947	387.418	383.109	704
chr4	2469574	2472109	Peak_551	3874	.	15.2662	387.407	383.098	1473
chr3	39447845	39448884	Peak_552	3872	.	17.0459	387.203	382.894	610
chr3	40498653	40499586	Peak_553	3870	.	17.4887	387.029	382.721	399
chr12	9216786	9218215	Peak_554	3870	.	23.8772	387.008	382.699	674
chr10	5930467	5933199	Peak_555	3869	.	17.9423	386.998	382.69	1216
chr16	89283566	89284681	Peak_556	3863	.	12.2495	386.379	382.072	371
chr14	105766177	105767722	Peak_557	3861	.	19.393	386.134	381.827	938
chr7	27207655	27210088	Peak_558	3854	.	14.3441	385.42	381.116	612
chr16	89555555	89557227	Peak_559	3842	.	17.22	384.293	379.991	1201
chr20	56884640	56885327	Peak_560	3842	.	24.2904	384.238	379.936	329
chr17	79669210	79671294	Peak_561	3841	.	13.818	384.165	379.863	1474
chr22	21335648	21337668	Peak_562	3838	.	15.1701	383.818	379.517	661
chr2	128458625	128460097	Peak_563	3837	.	18.0341	383.712	379.412	763
chr8	98655970	98658018	Peak_564	3837	.	12.3742	383.709	379.408	834
chr5	131704885	131706348	Peak_565	3834	.	14.8781	383.481	379.181	620
chr14	64193892	64195048	Peak_566	3833	.	25.3366	383.306	379.006	611
chr8	42948063	42949229	Peak_567	3832	.	18.3313	383.274	378.975	762
chr7	44529588	44530524	Peak_568	3826	.	15.1317	382.624	378.326	434
chr20	52824307	52825561	Peak_569	3823	.	18.9207	382.321	378.024	527
chr2	173939972	173941806	Peak_570	3818	.	19.3756	381.819	377.523	1048
chr6	64345522	64346906	Peak_571	3818	.	16.1035	381.8	377.505	777
chr2	234474683	234475649	Peak_572	3796	.	18.7006	379.651	375.36	543
chr19	5977096	5978619	Peak_573	3796	.	18.0254	379.619	375.329	761
chr18	29671494	29673457	Peak_574	3794	.	15.3819	379.446	375.156	1435
chr5	40834407	40836301	Peak_575	3791	.	16.7285	379.155	374.866	1217
chr1	202112406	202114175	Peak_576	3789	.	17.7463	378.915	374.627	1078
chr22	50219928	50221335	Peak_577	3788	.	19.8395	378.824	374.536	772
chr3	33155000	33156259	Peak_578	3786	.	17.8842	378.624	374.337	784
chr9	35095948	35096824	Peak_579	3782	.	15.3422	378.245	373.959	441
chr2	131850344	131851681	Peak_580	3778	.	15.0165	377.855	373.57	471
chr21	33031704	33032905	Peak_581	3777	.	19.4408	377.752	373.466	518
chr14	92979353	92980864	Peak_582	3773	.	20.171	377.331	373.047	740
chr6	24402930	24404085	Peak_583	3772	.	16.7726	377.246	372.962	483
chr22	46731061	46732579	Peak_584	3763	.	19.5366	376.308	372.026	648
chr5	141302500	141303870	Peak_585	3758	.	15.2827	375.847	371.566	648
chr1	24104137	24105626	Peak_586	3755	.	23.1212	375.544	371.265	951
chr1	178995000	178996059	Peak_587	3745	.	23.4873	374.536	370.259	591
chr20	60716944	60719681	Peak_588	3743	.	18.0239	374.329	370.053	1232
chr16	2317237	2319081	Peak_589	3736	.	18.0316	373.661	369.386	671
chr14	91975623	91977810	Peak_590	3727	.	15.5257	372.703	368.431	1438
chr1	166844789	166845726	Peak_591	3726	.	19.0674	372.689	368.416	495
chr16	57278812	57279845	Peak_592	3722	.	16.6133	372.291	368.019	466
chr17	6543039	6544703	Peak_593	3717	.	17.9471	371.783	367.512	958
chr4	88927878	88929727	Peak_594	3716	.	23.2376	371.612	367.342	1203
chr16	71756857	71758295	Peak_595	3706	.	20.1003	370.632	366.364	607
chr10	22725249	22726815	Peak_596	3705	.	13.2764	370.553	366.286	546
chr2	238968801	238970552	Peak_597	3703	.	21.5763	370.358	366.091	405
chr3	194990487	194992454	Peak_598	3690	.	22.5163	369.094	364.831	1114
chr19	35167822	35169146	Peak_599	3687	.	18.9273	368.791	364.529	939
chr8	145668512	145670729	Peak_600	3687	.	12.9362	368.744	364.481	1039
chr16	30545140	30546700	Peak_601	3683	.	14.7667	368.361	364.099	602
chr2	70417477	70418614	Peak_602	3673	.	16.4539	367.351	363.092	498
chr1	1708985	1711017	Peak_603	3670	.	18.8241	367.047	362.788	683
chr13	115079031	115080549	Peak_604	3667	.	17.7677	366.702	362.444	1102
chr3	45634587	45637201	Peak_605	3666	.	15.3618	366.687	362.43	1236
chr13	28711921	28713670	Peak_606	3664	.	26.5968	366.451	362.195	1304
chr7	154793877	154796315	Peak_607	3662	.	21.5045	366.245	361.989	1565
chr3	127390500	127392637	Peak_608	3658	.	19.4483	365.871	361.616	891
chr17	57970180	57971175	Peak_609	3651	.	11.2119	365.172	360.918	294
chr16	3550732	3551711	Peak_610	3650	.	15.5294	365.088	360.835	429
chr14	60558332	60559276	Peak_611	3647	.	17.4094	364.713	360.461	460
chr9	114935841	114938133	Peak_612	3646	.	25.5333	364.678	360.425	1561
chr9	104248274	104250189	Peak_613	3645	.	16.803	364.513	360.261	798
chr13	103451511	103453320	Peak_614	3639	.	14.9456	363.91	359.66	1270
chr10	35102936	35104218	Peak_615	3629	.	18.166	362.946	358.698	536
chr22	39714831	39716358	Peak_616	3626	.	19.9965	362.609	358.362	595
chr17	16117979	16120096	Peak_617	3624	.	14.5938	362.457	358.211	1116
chr17	17584246	17587138	Peak_618	3624	.	20.6315	362.413	358.166	648
chr10	101768911	101770125	Peak_619	3619	.	15.3539	361.967	357.722	555
chr4	140221933	140223754	Peak_620	3615	.	15.9545	361.55	357.306	1266
chr7	152372428	152373458	Peak_621	3606	.	16.4973	360.656	356.414	576
chr12	54388137	54390622	Peak_622	3603	.	14.8662	360.348	356.107	1401
chr15	77223878	77224780	Peak_623	3601	.	19.5403	360.181	355.941	447
chr5	179222150	179223939	Peak_624	3599	.	17.0571	359.987	355.747	712
chr14	103799431	103801482	Peak_625	3599	.	16.249	359.971	355.731	629
chr4	39978041	39980113	Peak_626	3598	.	20.2895	359.824	355.585	608
chr7	108209437	108211159	Peak_627	3592	.	15.8443	359.291	355.053	518
chr4	183837510	183839288	Peak_628	3584	.	21.1023	358.447	354.211	795
chr8	57905421	57906586	Peak_629	3580	.	18.5447	358.005	353.77	724
chr11	77790344	77791568	Peak_630	3564	.	14.1702	356.451	352.22	434
chr9	139939633	139941206	Peak_631	3557	.	16.3574	355.725	351.496	585
chr9	26956114	26956975	Peak_632	3556	.	18.6457	355.652	351.422	377
chr7	23506927	23509848	Peak_633	3551	.	21.9138	355.187	350.959	2353
chr1	212003299	212004577	Peak_634	3549	.	19.6307	354.979	350.752	604
chr7	29724139	29725495	Peak_635	3544	.	21.4269	354.489	350.262	704
chr16	2033799	2035064	Peak_636	3542	.	15.6783	354.291	350.065	617
chr15	38364558	38365807	Peak_637	3540	.	17.8453	354.023	349.798	666
chr11	9480851	9483367	Peak_638	3539	.	21.8653	353.999	349.774	2053
chr8	86132100	86132781	Peak_639	3539	.	14.8278	353.971	349.746	307
chr1	44820300	44821196	Peak_640	3529	.	13.8077	352.948	348.725	534
chr3	196729496	196730563	Peak_641	3528	.	18.7018	352.862	348.639	433
chr3	52719285	52720709	Peak_642	3527	.	17.7918	352.753	348.531	943
chr15	91445130	91446877	Peak_643	3518	.	18.8715	351.86	347.64	648
chr7	150065036	150066751	Peak_644	3518	.	18.8715	351.86	347.64	445
chr17	4045643	4047707	Peak_645	3517	.	16.8111	351.781	347.561	1534
chr8	143819868	143821402	Peak_646	3517	.	11.0996	351.718	347.499	629
chr3	45730585	45731564	Peak_647	3514	.	17.2482	351.483	347.264	498
chr4	667993	669638	Peak_648	3514	.	17.2482	351.483	347.264	688
chr2	73495642	73497143	Peak_649	3506	.	14.0212	350.639	346.422	609
chr17	19770174	19772106	Peak_650	3505	.	17.1148	350.571	346.354	828
chr19	54618516	54619709	Peak_651	3499	.	14.8905	349.968	345.752	408
chr6	170893074	170894090	Peak_652	3497	.	14.5489	349.71	345.495	503
chr2	152266188	152267287	Peak_653	3495	.	17.499	349.576	345.362	570
chr5	179245128	179248717	Peak_654	3492	.	17.6159	349.268	345.054	2976
chr19	19430775	19432314	Peak_655	3489	.	17.197	348.973	344.76	1022
chr8	42010309	42011354	Peak_656	3484	.	19.354	348.417	344.205	581
chr11	65547274	65549655	Peak_657	3480	.	17.3461	348.037	343.826	843
chr5	151150022	151151225	Peak_658	3477	.	17.153	347.794	343.583	735
chr17	3626557	3627967	Peak_659	3475	.	14.829	347.595	343.385	415
chr12	132434274	132435355	Peak_660	3474	.	18.701	347.488	343.278	403
chr7	55433134	55434593	Peak_661	3471	.	16.8346	347.186	342.977	857
chr1	197743643	197745736	Peak_662	3464	.	18.0976	346.457	342.249	484
chr8	74888211	74889145	Peak_663	3460	.	14.1711	346.05	341.843	430
chr14	74353137	74354346	Peak_664	3450	.	14.4299	345.008	340.804	649
chr15	43425513	43426600	Peak_665	3446	.	16.0077	344.689	340.486	480
chr2	37423479	37424474	Peak_666	3443	.	15.0435	344.353	340.151	419
chr17	65989066	65990572	Peak_667	3443	.	16.5898	344.338	340.135	1153
chr5	149864959	149866639	Peak_668	3440	.	21.6373	344.093	339.891	1082
chr22	31364230	31366358	Peak_669	3437	.	19.8549	343.797	339.597	1296
chr19	11485129	11485853	Peak_670	3436	.	15.6458	343.623	339.423	331
chr20	25604026	25605499	Peak_671	3435	.	15.3612	343.572	339.372	1036
chr9	140134499	140136532	Peak_672	3434	.	15.9844	343.468	339.268	545
chr16	66583018	66584623	Peak_673	3432	.	17.2628	343.281	339.081	863
chr6	125622465	125623357	Peak_674	3431	.	23.794	343.147	338.948	482
chr10	112063937	112064881	Peak_675	3418	.	13.0406	341.83	337.634	496
chr3	57678074	57679066	Peak_676	3416	.	15.7025	341.678	337.483	535
chr6	150184314	150185944	Peak_677	3415	.	16.9224	341.543	337.348	889
chr1	231556560	231558594	Peak_678	3412	.	18.2987	341.27	337.076	1213
chr22	32870201	32871593	Peak_679	3410	.	20.1628	341.046	336.853	687
chr19	2235261	2238006	Peak_680	3403	.	14.311	340.32	336.129	1723
chr9	128170238	128171901	Peak_681	3403	.	14.2911	340.32	336.129	675
chr4	187111753	187113657	Peak_682	3402	.	18.4324	340.229	336.038	1018
chr1	70686901	70687954	Peak_683	3401	.	17.3909	340.108	335.916	547
chr19	4399715	4400715	Peak_684	3395	.	17.1315	339.517	335.327	586
chr9	114392862	114394379	Peak_685	3394	.	14.9035	339.433	335.243	1042
chr15	40330481	40332108	Peak_686	3392	.	19.0466	339.278	335.089	770
chr12	32111995	32113224	Peak_687	3390	.	22.1176	339.067	334.878	623
chr21	38444095	38446409	Peak_688	3390	.	16.8712	339.051	334.862	1064
chr2	230931869	230934019	Peak_689	3390	.	16.8456	339.051	334.862	1360
chr8	144698950	144700788	Peak_690	3387	.	15.5105	338.789	334.601	993
chr18	9334633	9335547	Peak_691	3386	.	15.9754	338.651	334.464	418
chr10	88515227	88517466	Peak_692	3386	.	16.9703	338.616	334.428	1424
chr9	139378022	139379404	Peak_693	3384	.	12.9552	338.451	334.264	639
chr14	93650482	93651846	Peak_694	3380	.	15.5886	338.047	333.861	460
chr16	3507221	3509014	Peak_695	3380	.	18.6994	338.033	333.847	571
chr1	53191936	53192972	Peak_696	3376	.	18.3446	337.657	333.472	401
chr20	47894040	47895919	Peak_697	3374	.	15.9517	337.431	333.247	919
chr20	35917611	35918986	Peak_698	3372	.	17.5042	337.279	333.095	654
chr17	43137704	43138590	Peak_699	3367	.	12.9005	336.767	332.584	496
chr2	109149973	109151539	Peak_700	3361	.	24.0821	336.149	331.968	1183
chr16	2263897	2265509	Peak_701	3352	.	17.9977	335.229	331.05	613
chr11	74659603	74660648	Peak_702	3351	.	15.1197	335.178	330.999	507
chr17	66243343	66244988	Peak_703	3349	.	15.8572	334.994	330.816	520
chr11	120195697	120196658	Peak_704	3346	.	13.3375	334.616	330.439	506
chr3	13460597	13462411	Peak_705	3343	.	18.3745	334.38	330.204	943
chr9	111881104	111882421	Peak_706	3339	.	20.1724	333.986	329.81	871
chr4	78739440	78741841	Peak_707	3338	.	22.8134	333.861	329.685	1711
chr12	111051706	111052476	Peak_708	3337	.	15.8099	333.777	329.602	423
chr3	38495374	38496981	Peak_709	3335	.	19.0735	333.592	329.418	431
chr16	28857224	28858627	Peak_710	3332	.	13.8253	333.29	329.116	768
chr16	25268482	25270083	Peak_711	3332	.	15.4292	333.22	329.046	482
chr15	41708386	41710242	Peak_712	3330	.	15.0008	333.096	328.923	1243
chr5	41904275	41904989	Peak_713	3329	.	17.0576	332.91	328.737	389
chr20	18118147	18119259	Peak_714	3327	.	15.0539	332.789	328.616	576
chr19	661928	663956	Peak_715	3325	.	17.1184	332.521	328.349	972
chr14	64969274	64972113	Peak_716	3324	.	14.7043	332.474	328.302	2411
chr15	49170076	49170848	Peak_717	3322	.	17.3405	332.236	328.065	419
chr17	61918075	61920404	Peak_718	3320	.	12.5884	332.071	327.9	1812
chr2	74153808	74154579	Peak_719	3320	.	16.1718	332.017	327.846	401
chr17	79366665	79368045	Peak_720	3317	.	11.2843	331.731	327.561	936
chr1	1208164	1209871	Peak_721	3315	.	16.6081	331.528	327.358	874
chr17	74732346	74733974	Peak_722	3314	.	11.6021	331.411	327.241	970
chr11	3078419	3079411	Peak_723	3312	.	14.6831	331.292	327.123	474
chr9	130547656	130549207	Peak_724	3312	.	18.1396	331.246	327.077	855
chr2	113991679	113994720	Peak_725	3311	.	18.7905	331.169	327	1910
chr1	16825012	16826283	Peak_726	3308	.	15.6937	330.846	326.679	437
chr9	37422106	37423881	Peak_727	3307	.	16.1472	330.79	326.623	772
chr8	145149636	145151206	Peak_728	3305	.	13.9003	330.552	326.385	522
chr17	26219754	26220598	Peak_729	3299	.	18.0811	329.967	325.802	361
chr11	9405922	9407025	Peak_730	3296	.	15.1212	329.676	325.512	391
chr10	131908291	131909340	Peak_731	3296	.	20.7804	329.606	325.442	684
chr4	2536970	2539612	Peak_732	3295	.	18.0004	329.5	325.336	841
chr2	263801	265532	Peak_733	3294	.	21.6566	329.491	325.327	1363
chr10	118608221	118609942	Peak_734	3290	.	12.3941	329.094	324.931	1245
chr5	37248784	37250354	Peak_735	3289	.	14.5983	328.93	324.768	482
chr4	2964425	2965775	Peak_736	3287	.	14.2757	328.753	324.591	555
chr22	37955719	37957528	Peak_737	3276	.	17.8009	327.677	323.518	470
chr11	110166413	110167954	Peak_738	3271	.	16.0242	327.118	322.961	636
chr14	73524830	73526111	Peak_739	3270	.	15.9277	327.05	322.893	455
chr10	99472562	99474921	Peak_740	3269	.	16.9699	326.913	322.756	1149
chr21	34774736	34776794	Peak_741	3268	.	21.5217	326.899	322.742	1196
chr12	54411553	54412701	Peak_742	3261	.	17.3989	326.146	321.991	559
chr11	129871339	129872662	Peak_743	3256	.	14.8562	325.647	321.493	542
chr8	146277746	146278993	Peak_744	3252	.	14.1937	325.248	321.095	304
chr11	43333276	43334516	Peak_745	3250	.	16.8563	325.077	320.924	466
chr14	77786599	77788340	Peak_746	3249	.	14.9873	324.902	320.75	422
chr7	6629052	6630439	Peak_747	3248	.	17.3431	324.886	320.734	691
chr6	24494927	24496013	Peak_748	3247	.	14.7605	324.775	320.624	422
chr8	48172792	48174137	Peak_749	3240	.	15.5025	324.079	319.929	572
chr5	108083749	108084657	Peak_750	3240	.	21.3876	324.046	319.896	461
chrX	154841864	154842900	Peak_751	3236	.	24.3905	323.688	319.539	408
chrX	57935788	57937049	Peak_752	3236	.	24.3905	323.688	319.539	710
chr6	38670132	38671095	Peak_753	3235	.	17.8469	323.59	319.442	581
chr10	119134036	119135698	Peak_754	3230	.	13.5477	323.079	318.932	771
chr10	76969475	76971462	Peak_755	3224	.	17.4531	322.458	318.312	1256
chr2	61696700	61697998	Peak_756	3219	.	21.0949	321.96	317.816	997
chr12	12714304	12715421	Peak_757	3217	.	16.2564	321.724	317.58	509
chr9	126691418	126693199	Peak_758	3213	.	21.2723	321.331	317.189	794
chr8	61428941	61430354	Peak_759	3205	.	17.7085	320.59	316.449	1037
chr1	113216909	113218345	Peak_760	3204	.	15.4079	320.46	316.32	614
chr17	62914908	62916547	Peak_761	3197	.	13.3211	319.787	315.648	484
chr22	29999122	30000405	Peak_762	3196	.	17.4926	319.622	315.484	745
chr12	6961147	6962625	Peak_763	3195	.	12.0254	319.549	315.411	406
chrX	106361347	106362303	Peak_764	3194	.	24.1571	319.429	315.291	565
chr3	120067067	120068446	Peak_765	3192	.	15.7955	319.291	315.153	859
chr1	23345507	23346821	Peak_766	3190	.	15.5745	319.006	314.87	708
chr7	32996647	32997933	Peak_767	3187	.	19.0886	318.769	314.633	625
chr5	179125148	179126987	Peak_768	3186	.	19.2609	318.619	314.484	1089
chr16	30913144	30914217	Peak_769	3185	.	18.2167	318.599	314.464	558
chr3	49026924	49028524	Peak_770	3185	.	15.7537	318.588	314.453	864
chr14	75642652	75643591	Peak_771	3185	.	14.6147	318.542	314.407	493
chr5	138533257	138534217	Peak_772	3179	.	16.5259	317.975	313.842	566
chr1	33814617	33816123	Peak_773	3178	.	19.6267	317.873	313.739	569
chr3	193310709	193311685	Peak_774	3175	.	20.2741	317.557	313.425	368
chr10	104402048	104406433	Peak_775	3174	.	10.5379	317.471	313.338	2500
chr7	102987980	102988797	Peak_776	3173	.	18.1859	317.317	313.185	369
chr13	98627726	98629591	Peak_777	3165	.	24.0638	316.596	312.466	796
chr15	40674885	40675907	Peak_778	3163	.	16.5356	316.383	312.253	545
chr6	138427874	138429033	Peak_779	3160	.	17.0077	316.099	311.97	483
chr17	17108244	17110389	Peak_780	3159	.	16.2475	315.907	311.779	1079
chr9	139760436	139761384	Peak_781	3157	.	16.3235	315.7	311.573	503
chr4	3533484	3534733	Peak_782	3156	.	15.2424	315.65	311.522	479
chr19	36035953	36037082	Peak_783	3148	.	14.1744	314.848	310.723	664
chr3	182971132	182972874	Peak_784	3147	.	22.9344	314.786	310.662	1028
chr12	120638330	120639236	Peak_785	3139	.	16.4554	313.909	309.786	407
chr3	63848596	63850388	Peak_786	3139	.	16.4554	313.909	309.786	721
chr12	107167285	107168983	Peak_787	3138	.	14.9545	313.803	309.68	941
chr3	149375337	149376969	Peak_788	3136	.	13.6276	313.69	309.568	893
chr1	65431099	65432601	Peak_789	3136	.	22.4514	313.666	309.544	925
chr21	44312541	44314310	Peak_790	3135	.	16.9239	313.598	309.476	1092
chr4	1240966	1244178	Peak_791	3135	.	18.8256	313.562	309.44	1340
chr3	9438880	9440367	Peak_792	3134	.	17.437	313.448	309.326	743
chr4	48832986	48833947	Peak_793	3134	.	16.2653	313.444	309.323	471
chr4	4543229	4544329	Peak_794	3133	.	17.2335	313.318	309.197	453
chr9	66457871	66458777	Peak_795	3132	.	8.2523	313.286	309.165	521
chr6	26596916	26597712	Peak_796	3131	.	15.9747	313.141	309.02	360
chr10	71992150	71993603	Peak_797	3129	.	17.3874	312.998	308.877	812
chr3	127308161	127310288	Peak_798	3129	.	15.3574	312.973	308.852	1211
chr19	32836285	32837394	Peak_799	3128	.	19.3186	312.859	308.739	489
chr15	69744377	69746001	Peak_800	3128	.	12.3233	312.829	308.709	937
chr8	144814439	144816326	Peak_801	3127	.	12.5442	312.795	308.675	1088
chr22	29662406	29665745	Peak_802	3127	.	17.2763	312.717	308.597	2194
chr1	224544227	224545343	Peak_803	3126	.	17.5752	312.691	308.571	592
chr12	132194731	132196407	Peak_804	3123	.	14.0986	312.368	308.249	1014
chr17	73780913	73781780	Peak_805	3115	.	8.67054	311.55	307.433	457
chr6	155053749	155055653	Peak_806	3109	.	18.7269	310.966	306.851	1296
chr1	67518779	67520287	Peak_807	3109	.	17.3492	310.924	306.809	953
chr1	9598844	9600519	Peak_808	3108	.	17.176	310.805	306.69	958
chr16	85044478	85045848	Peak_809	3102	.	13.5278	310.249	306.136	457
chr4	73934753	73935828	Peak_810	3101	.	13.7634	310.17	306.057	434
chr6	146055803	146057062	Peak_811	3101	.	15.4586	310.111	305.999	432
chr1	247494272	247496144	Peak_812	3099	.	17.0816	309.937	305.825	1044
chr4	1873123	1874239	Peak_813	3096	.	19.9254	309.677	305.566	305
chr11	63438026	63439784	Peak_814	3096	.	18.6941	309.67	305.558	1294
chr2	70520388	70521233	Peak_815	3094	.	11.8365	309.495	305.384	418
chr9	129566898	129568000	Peak_816	3089	.	16.295	308.976	304.866	521
chr12	133337655	133339232	Peak_817	3089	.	16.1221	308.939	304.83	531
chr5	173042959	173044116	Peak_818	3086	.	15.6983	308.652	304.543	509
chr4	10458006	10459482	Peak_819	3086	.	16.9419	308.645	304.537	760
chr2	240321649	240324046	Peak_820	3086	.	16.7283	308.612	304.503	1633
chr4	6783840	6785689	Peak_821	3085	.	18.4636	308.541	304.433	899
chr1	46152157	46154221	Peak_822	3083	.	18.6612	308.375	304.267	881
chr20	47537631	47539011	Peak_823	3081	.	16.1803	308.109	304.003	820
chr7	6768604	6770302	Peak_824	3081	.	16.2069	308.109	304.003	1059
chr12	122515961	122517548	Peak_825	3079	.	17.7664	307.935	303.829	913
chr15	102191884	102193165	Peak_826	3077	.	16.2415	307.745	303.639	523
chr17	28705745	28707033	Peak_827	3077	.	19.4619	307.737	303.632	503
chr5	137672999	137675150	Peak_828	3075	.	18.2179	307.52	303.415	363
chr9	133709907	133710712	Peak_829	3072	.	18.3989	307.252	303.148	499
chr20	1446798	1447774	Peak_830	3071	.	17.7863	307.101	302.997	460
chr4	87812881	87814029	Peak_831	3069	.	15.7632	306.978	302.874	532
chr5	111496354	111497148	Peak_832	3067	.	13.6404	306.715	302.613	366
chr1	17764243	17765915	Peak_833	3063	.	19.0196	306.388	302.287	521
chr5	159826414	159827310	Peak_834	3063	.	19.0112	306.322	302.22	489
chr20	45985402	45986970	Peak_835	3058	.	15.7185	305.829	301.729	1072
chr16	81069173	81070333	Peak_836	3056	.	14.892	305.61	301.51	602
chr6	160147573	160149252	Peak_837	3052	.	15.3111	305.292	301.193	1246
chr13	91999420	92001631	Peak_838	3051	.	22.4669	305.164	301.066	1467
chr2	178076614	178078366	Peak_839	3049	.	16.7999	304.903	300.805	1166
chr12	131355205	131357476	Peak_840	3046	.	18.3018	304.678	300.581	1859
chr19	59030038	59031903	Peak_841	3046	.	17.115	304.635	300.538	1064
chr14	35008328	35009141	Peak_842	3046	.	15.6929	304.614	300.517	457
chr9	127623346	127624706	Peak_843	3044	.	13.5994	304.418	300.322	628
chr16	3450600	3451794	Peak_844	3042	.	14.0452	304.205	300.109	837
chr17	39966767	39968822	Peak_845	3040	.	15.2619	304.09	299.995	1143
chr22	39101777	39102837	Peak_846	3036	.	15.8978	303.642	299.548	332
chr7	856018	857099	Peak_847	3035	.	19.219	303.552	299.458	371
chr1	100503383	100504793	Peak_848	3034	.	20.9087	303.421	299.328	722
chr8	145157501	145160176	Peak_849	3029	.	12.5091	302.925	298.833	1284
chr19	48900853	48902875	Peak_850	3028	.	16.0544	302.835	298.743	932
chr3	128597388	128598608	Peak_851	3027	.	12.7357	302.772	298.68	839
chr19	11039075	11040657	Peak_852	3023	.	15.2275	302.366	298.276	591
chr19	49588355	49589459	Peak_853	3021	.	15.5904	302.189	298.099	510
chr17	37356010	37357411	Peak_854	3021	.	13.5175	302.124	298.034	844
chr17	29232808	29233873	Peak_855	3019	.	11.6424	301.926	297.837	575
chr3	14165180	14167436	Peak_856	3013	.	12.9608	301.354	297.266	962
chr13	41767849	41769023	Peak_857	3009	.	13.4765	300.979	296.892	734
chr21	38361722	38363251	Peak_858	3009	.	15.5648	300.977	296.891	910
chr3	184428546	184429960	Peak_859	3009	.	13.7928	300.917	296.831	1004
chr7	74071299	74073160	Peak_860	3003	.	17.5845	300.399	296.314	1127
chr6	43196495	43197454	Peak_861	3002	.	13.6632	300.236	296.152	533
chr14	69282380	69283657	Peak_862	2999	.	13.1806	299.992	295.908	732
chr9	88419834	88421041	Peak_863	2995	.	21.174	299.552	295.47	640
chr2	37383187	37384800	Peak_864	2994	.	19.2625	299.486	295.404	722
chr10	104191404	104192604	Peak_865	2993	.	11.4069	299.375	295.293	748
chr10	15138875	15140033	Peak_866	2992	.	15.1143	299.294	295.212	445
chr5	131745922	131747496	Peak_867	2990	.	14.5856	299.035	294.954	643
chr2	220024989	220025840	Peak_868	2988	.	18.4297	298.887	294.807	457
chr8	143807448	143809668	Peak_869	2980	.	9.89449	298.089	294.011	480
chr5	41924991	41926062	Peak_870	2980	.	15.0003	298.085	294.007	615
chr12	110939240	110940293	Peak_871	2979	.	16.8327	297.942	293.865	471
chr2	216176447	216177739	Peak_872	2978	.	17.4917	297.866	293.789	561
chr1	1509413	1510995	Peak_873	2974	.	13.6656	297.459	293.383	740
chr6	34759580	34761077	Peak_874	2968	.	15.5185	296.808	292.733	485
chr5	114879511	114881233	Peak_875	2967	.	15.8673	296.723	292.649	695
chr16	67562207	67564111	Peak_876	2965	.	14.6512	296.586	292.512	848
chr6	126277732	126278715	Peak_877	2964	.	12.325	296.487	292.414	393
chr19	1591867	1593002	Peak_878	2964	.	16.7509	296.483	292.409	624
chr17	1012134	1015088	Peak_879	2964	.	16.4816	296.421	292.348	627
chr2	101869134	101870148	Peak_880	2962	.	16.0583	296.218	292.146	403
chr17	79485271	79487136	Peak_881	2961	.	11.3123	296.175	292.102	1105
chr1	19923096	19924282	Peak_882	2961	.	14.5855	296.124	292.052	639
chr3	48955634	48956977	Peak_883	2961	.	13.0435	296.106	292.034	868
chr17	18161169	18162560	Peak_884	2960	.	13.9896	296.044	291.972	736
chr8	145652792	145654061	Peak_885	2956	.	11.6183	295.626	291.555	908
chr16	12008680	12010483	Peak_886	2955	.	15.4926	295.598	291.528	669
chr17	79454396	79456181	Peak_887	2955	.	10.9704	295.592	291.521	405
chr1	38259425	38261047	Peak_888	2955	.	15.7871	295.504	291.434	332
chr10	97889214	97890576	Peak_889	2954	.	16.7451	295.45	291.38	464
chr2	109335323	109336697	Peak_890	2952	.	14.2225	295.217	291.147	754
chr8	145514230	145515999	Peak_891	2952	.	10.646	295.212	291.143	1241
chr14	45603003	45603794	Peak_892	2951	.	13.602	295.158	291.089	412
chr19	13228798	13229736	Peak_893	2948	.	15.8855	294.811	290.743	519
chr10	35624812	35626662	Peak_894	2944	.	17.2638	294.441	290.374	315
chr2	148777580	148778475	Peak_895	2944	.	17.2945	294.441	290.374	474
chr1	224032549	224034822	Peak_896	2944	.	17.8812	294.432	290.365	1514
chr4	174089600	174091534	Peak_897	2943	.	19.3049	294.359	290.292	963
chr5	64063642	64064771	Peak_898	2940	.	14.1997	294.047	289.981	752
chr14	78226859	78227710	Peak_899	2940	.	13.5808	294.01	289.944	461
chr1	157107782	157109027	Peak_900	2937	.	16.1973	293.766	289.701	769
chr4	147096683	147097655	Peak_901	2937	.	18.4205	293.75	289.685	346
chr1	201951507	201952753	Peak_902	2935	.	18.5875	293.545	289.48	469
chr17	43127881	43129072	Peak_903	2933	.	18.4989	293.343	289.279	900
chr8	145733304	145735718	Peak_904	2931	.	12.1929	293.188	289.124	1621
chr19	13066588	13068503	Peak_905	2931	.	15.4148	293.183	289.119	1173
chr12	8184919	8186053	Peak_906	2928	.	19.701	292.823	288.76	556
chr5	32443557	32445274	Peak_907	2927	.	19.9099	292.745	288.683	921
chr2	200819873	200821372	Peak_908	2925	.	14.0668	292.534	288.473	828
chr2	242254043	242256430	Peak_909	2921	.	14.8684	292.134	288.073	1619
chr16	82044556	82045483	Peak_910	2920	.	11.7939	292.053	287.993	415
chr1	166808182	166809884	Peak_911	2920	.	18.3964	292.052	287.992	369
chr10	85899025	85899916	Peak_912	2919	.	17.7564	291.922	287.862	425
chr7	32981531	32983062	Peak_913	2919	.	17.7888	291.922	287.862	967
chr1	15943712	15944731	Peak_914	2915	.	17.2133	291.557	287.498	494
chr3	126193638	126194899	Peak_915	2914	.	19.2576	291.422	287.363	794
chr4	184364971	184366523	Peak_916	2913	.	22.6637	291.352	287.294	960
chr5	172197338	172198965	Peak_917	2913	.	15.2318	291.33	287.271	547
chr10	22517908	22518648	Peak_918	2913	.	16.1135	291.309	287.251	332
chr11	62413017	62414260	Peak_919	2911	.	15.3753	291.156	287.099	798
chr6	143832022	143833243	Peak_920	2907	.	13.1691	290.721	286.665	527
chr3	125238334	125239488	Peak_921	2906	.	17.1408	290.668	286.611	441
chr16	67062335	67064101	Peak_922	2906	.	17.7194	290.611	286.555	1003
chr1	42921302	42923043	Peak_923	2905	.	14.1086	290.546	286.49	1140
chr8	71519533	71521085	Peak_924	2904	.	16.5408	290.48	286.425	658
chr12	46122412	46124854	Peak_925	2899	.	22.6171	289.963	285.909	1956
chr10	93683324	93684079	Peak_926	2895	.	14.3911	289.511	285.459	376
chr15	41952461	41953342	Peak_927	2894	.	15.6	289.428	285.376	414
chr11	92930530	92931430	Peak_928	2893	.	14.0631	289.381	285.329	433
chr10	105109878	105111732	Peak_929	2891	.	10.6653	289.132	285.081	498
chr22	42016292	42017985	Peak_930	2890	.	11.3188	289.064	285.013	1230
chr3	196594158	196595540	Peak_931	2888	.	16.6278	288.858	284.807	806
chr12	104530990	104532575	Peak_932	2885	.	22.4771	288.575	284.526	749
chr3	128444746	128445939	Peak_933	2885	.	14.7455	288.57	284.52	467
chr6	131456117	131457380	Peak_934	2884	.	16.5002	288.427	284.378	516
chr1	32573531	32574951	Peak_935	2883	.	12.3445	288.317	284.268	405
chr10	121410636	121412063	Peak_936	2882	.	11.9026	288.219	284.17	1043
chr15	77362571	77363785	Peak_937	2882	.	15.5466	288.217	284.168	720
chr13	99228180	99230475	Peak_938	2881	.	21.2143	288.192	284.144	857
chr22	29168440	29169492	Peak_939	2879	.	19.859	287.922	283.874	418
chr8	38088542	38090084	Peak_940	2879	.	12.5765	287.915	283.867	742
chr12	44229273	44230442	Peak_941	2876	.	16.5685	287.616	283.569	598
chr4	186130288	186131960	Peak_942	2876	.	16.5685	287.616	283.569	687
chr2	228189734	228190803	Peak_943	2873	.	14.6963	287.384	283.337	369
chr1	233463409	233465338	Peak_944	2872	.	20.5421	287.293	283.247	401
chr10	70166105	70167579	Peak_945	2872	.	16.7172	287.242	283.195	792
chr7	27210918	27214185	Peak_946	2871	.	16.0008	287.187	283.141	2304
chr2	177133891	177134713	Peak_947	2870	.	13.9948	287.055	283.009	387
chr10	120924575	120926672	Peak_948	2869	.	10.4602	286.944	282.899	467
chr17	80185327	80188994	Peak_949	2868	.	10.1729	286.846	282.801	981
chr15	76603047	76604041	Peak_950	2867	.	16.3948	286.766	282.722	536
chr11	1330041	1331779	Peak_951	2865	.	17.0278	286.532	282.488	1220
chr21	45283960	45285968	Peak_952	2863	.	19.6395	286.382	282.338	1501
chr9	124360109	124362353	Peak_953	2859	.	12.7469	285.983	281.941	649
chr19	4063740	4066073	Peak_954	2855	.	17.1128	285.543	281.502	1930
chr22	46465489	46468766	Peak_955	2855	.	16.3365	285.53	281.49	629
chr4	56261816	56263026	Peak_956	2854	.	12.0537	285.496	281.456	592
chr8	141644026	141646220	Peak_957	2852	.	13.3132	285.215	281.175	1136
chr2	85838461	85840022	Peak_958	2850	.	18.7098	285.054	281.014	1152
chr2	74874210	74875683	Peak_959	2850	.	12.2513	285.007	280.967	958
chr17	46687278	46688907	Peak_960	2849	.	11.7758	284.98	280.941	526
chr22	50745142	50746180	Peak_961	2847	.	14.907	284.787	280.748	695
chr3	129611600	129612967	Peak_962	2846	.	18.7915	284.633	280.594	551
chr1	20834114	20835071	Peak_963	2845	.	15.4129	284.59	280.552	359
chrX	53253550	53254828	Peak_964	2845	.	21.413	284.566	280.528	723
chr11	120206823	120208204	Peak_965	2845	.	18.2079	284.513	280.476	461
chr12	118573414	118574841	Peak_966	2844	.	15.4738	284.499	280.461	733
chr14	101052398	101054319	Peak_967	2841	.	15.4339	284.11	280.074	723
chr7	99933084	99934327	Peak_968	2839	.	15.8341	283.966	279.93	832
chr9	74978771	74980988	Peak_969	2837	.	19.0559	283.746	279.711	1037
chr9	102668620	102669774	Peak_970	2836	.	14.202	283.648	279.612	584
chr2	136742453	136743719	Peak_971	2834	.	16.3246	283.482	279.447	396
chr9	95525985	95527895	Peak_972	2829	.	16.6935	282.925	278.892	1517
chr9	77642397	77643544	Peak_973	2823	.	15.6908	282.352	278.321	744
chr18	61089416	61090511	Peak_974	2823	.	11.5378	282.34	278.309	503
chr10	13389014	13390808	Peak_975	2822	.	19.1742	282.295	278.264	407
chr14	100680208	100681517	Peak_976	2819	.	13.1181	281.968	277.938	430
chr21	40720083	40721110	Peak_977	2819	.	20.1395	281.948	277.918	719
chr2	85644744	85646818	Peak_978	2817	.	14.8988	281.758	277.728	753
chr11	10878818	10880686	Peak_979	2814	.	13.178	281.451	277.422	1392
chr2	233561707	233562930	Peak_980	2814	.	16.3613	281.425	277.396	549
chr12	104359211	104360296	Peak_981	2813	.	13.473	281.309	277.28	678
chr1	114353929	114355323	Peak_982	2811	.	17.691	281.188	277.16	658
chr10	22540616	22542863	Peak_983	2810	.	13.5259	281.037	277.009	862
chr15	75229641	75230908	Peak_984	2808	.	12.6451	280.867	276.84	515
chr18	74533622	74536124	Peak_985	2806	.	20.0584	280.614	276.588	1398
chr12	49452937	49455188	Peak_986	2801	.	14.0838	280.144	276.119	1178
chr1	157015000	157016345	Peak_987	2797	.	16.1489	279.786	275.763	434
chr17	44847932	44849722	Peak_988	2793	.	11.5073	279.355	275.333	815
chr11	32112323	32113681	Peak_989	2792	.	13.5592	279.263	275.241	694
chr14	75348173	75349249	Peak_990	2789	.	15.1435	278.963	274.943	602
chr6	71997933	71999759	Peak_991	2789	.	21.9637	278.905	274.884	802
chr15	65321267	65322102	Peak_992	2787	.	15.5526	278.713	274.693	449
chr9	125666815	125667822	Peak_993	2785	.	14.2236	278.538	274.518	630
chr22	23487457	23488421	Peak_994	2782	.	13.3404	278.238	274.219	372
chr11	393197	395405	Peak_995	2780	.	13.072	278.049	274.031	1160
chr17	56769388	56770414	Peak_996	2779	.	10.8714	277.967	273.949	450
chr5	81573589	81574693	Peak_997	2779	.	14.3766	277.941	273.923	359
chr2	191398938	191400002	Peak_998	2779	.	12.3076	277.937	273.92	683
chr16	74330398	74331467	Peak_999	2778	.	14.0365	277.814	273.796	424
chr3	169898453	169899637	Peak_1000	2773	.	17.524	277.378	273.362	566
chr1	241682159	241683381	Peak_1001	2773	.	16.0611	277.329	273.314	597
chr5	145826673	145827922	Peak_1002	2771	.	10.871	277.162	273.146	543
chr19	33792794	33794788	Peak_1003	2770	.	15.1849	277.074	273.058	539
chr10	51564757	51566011	Peak_1004	2770	.	14.7451	277.001	272.986	717
chr14	57856619	57858219	Peak_1005	2769	.	14.739	276.939	272.924	1079
chr5	56246990	56248521	Peak_1006	2767	.	19.3851	276.796	272.782	707
chr2	128051080	128052325	Peak_1007	2767	.	11.8187	276.78	272.766	486
chr16	22448136	22449184	Peak_1008	2766	.	15.5546	276.668	272.654	572
chr14	59950200	59951768	Peak_1009	2766	.	13.9655	276.651	272.637	673
chr3	5229117	5230504	Peak_1010	2761	.	16.0026	276.103	272.091	570
chr9	140316847	140318903	Peak_1011	2761	.	16.0026	276.103	272.091	675
chr8	144820035	144823232	Peak_1012	2760	.	11.1678	276.008	271.996	2535
chr2	20646387	20647753	Peak_1013	2758	.	15.5656	275.821	271.809	629
chr9	140512337	140514319	Peak_1014	2756	.	16.9172	275.606	271.595	700
chr15	44829240	44830165	Peak_1015	2755	.	14.3028	275.592	271.582	463
chr4	2844738	2846286	Peak_1016	2755	.	14.3028	275.592	271.582	621
chr12	93322071	93323559	Peak_1017	2754	.	19.346	275.48	271.47	702
chr5	112256663	112258043	Peak_1018	2753	.	15.0106	275.369	271.36	583
chr15	50646151	50648122	Peak_1019	2752	.	18.0232	275.291	271.282	1642
chr2	65454147	65455931	Peak_1020	2750	.	18.1891	275.054	271.045	1035
chr9	33076123	33077055	Peak_1021	2748	.	10.6453	274.897	270.888	465
chr7	45150556	45152129	Peak_1022	2746	.	12.1923	274.631	270.624	640
chr11	33757022	33758604	Peak_1023	2744	.	16.4646	274.448	270.441	768
chr7	143598374	143599570	Peak_1024	2743	.	13.5621	274.343	270.336	723
chr8	119123793	119124756	Peak_1025	2741	.	11.5161	274.161	270.155	552
chr11	61128983	61130534	Peak_1026	2738	.	12.6773	273.824	269.819	671
chr5	1110972	1112352	Peak_1027	2737	.	15.012	273.774	269.769	1004
chr3	135913663	135916239	Peak_1028	2735	.	11.7283	273.529	269.525	2090
chr11	10471906	10473165	Peak_1029	2734	.	11.1096	273.455	269.451	684
chr16	75681230	75682559	Peak_1030	2733	.	13.7463	273.339	269.336	763
chr12	125478017	125479300	Peak_1031	2730	.	18.2608	273.072	269.07	498
chr16	88772110	88773696	Peak_1032	2730	.	11.3618	273.068	269.066	563
chr8	67836509	67838323	Peak_1033	2726	.	10.2689	272.627	268.627	1065
chr12	72233075	72234271	Peak_1034	2725	.	14.9852	272.579	268.578	674
chr22	41252074	41253541	Peak_1035	2725	.	14.9852	272.579	268.578	432
chr10	43277535	43278443	Peak_1036	2724	.	12.1539	272.433	268.432	465
chr15	50978245	50979627	Peak_1037	2724	.	12.1347	272.433	268.432	993
chr19	4968870	4969789	Peak_1038	2716	.	15.6935	271.65	267.652	463
chr9	19379740	19380949	Peak_1039	2715	.	12.6158	271.59	267.592	730
chr8	91657149	91658651	Peak_1040	2713	.	12.1155	271.335	267.338	1008
chr17	61850425	61851128	Peak_1041	2707	.	10.5377	270.753	266.758	369
chr13	60970220	60972430	Peak_1042	2706	.	21.5437	270.674	266.679	1583
chr19	44860230	44861103	Peak_1043	2704	.	18.1405	270.411	266.417	520
chr20	60757857	60758904	Peak_1044	2703	.	18.2747	270.385	266.391	358
chr19	40022770	40023580	Peak_1045	2702	.	13.0783	270.279	266.285	482
chr2	54784613	54786259	Peak_1046	2699	.	14.6903	269.935	265.943	406
chr14	56045786	56048083	Peak_1047	2699	.	19.8361	269.921	265.928	1500
chr7	6745480	6746821	Peak_1048	2699	.	13.1217	269.91	265.918	832
chr5	16464998	16466924	Peak_1049	2699	.	14.4633	269.903	265.91	1214
chr21	44526953	44528106	Peak_1050	2698	.	13.6297	269.879	265.887	506
chr7	107383361	107385154	Peak_1051	2698	.	11.4107	269.872	265.879	1398
chr1	224370405	224372135	Peak_1052	2698	.	13.0074	269.808	265.815	1110
chr9	96213170	96215318	Peak_1053	2697	.	12.308	269.766	265.774	1488
chr11	66609970	66611282	Peak_1054	2697	.	14.0815	269.742	265.75	589
chr2	27434162	27436050	Peak_1055	2695	.	16.1999	269.514	265.523	967
chr11	66312983	66313777	Peak_1056	2694	.	14.9663	269.443	265.452	430
chr9	137367113	137369116	Peak_1057	2694	.	15.2752	269.416	265.425	1215
chr2	69968404	69969703	Peak_1058	2694	.	12.4894	269.41	265.42	613
chr19	54973201	54975126	Peak_1059	2692	.	15.4369	269.295	265.305	1108
chr3	47822645	47824119	Peak_1060	2690	.	12.8176	269.029	265.039	1033
chr1	154933730	154935261	Peak_1061	2689	.	14.8516	269	265.01	883
chr2	73460516	73462187	Peak_1062	2689	.	13.2244	268.976	264.986	1141
chr10	27793050	27793998	Peak_1063	2685	.	15.2854	268.569	264.582	404
chr16	89778127	89779454	Peak_1064	2684	.	11.3696	268.465	264.478	389
chr5	138088195	138089918	Peak_1065	2677	.	17.3718	267.781	263.796	1197
chr17	76835749	76837693	Peak_1066	2677	.	10.2088	267.717	263.732	1022
chr10	121484644	121486399	Peak_1067	2676	.	9.87314	267.609	263.624	482
chr19	54959609	54961166	Peak_1068	2676	.	12.5099	267.602	263.617	922
chr4	699412	700248	Peak_1069	2673	.	13.6581	267.388	263.404	439
chr8	124252973	124253991	Peak_1070	2672	.	8.47343	267.28	263.296	471
chr6	150038432	150039678	Peak_1071	2671	.	15.6651	267.15	263.167	547
chr18	2654929	2656912	Peak_1072	2670	.	16.1572	267.037	263.054	1071
chr7	5084864	5086314	Peak_1073	2669	.	13.6189	266.959	262.976	825
chr20	34638039	34639100	Peak_1074	2669	.	11.981	266.956	262.973	602
chr16	87983607	87985842	Peak_1075	2669	.	12.0888	266.938	262.956	1742
chr5	32173543	32174982	Peak_1076	2668	.	13.8135	266.894	262.911	585
chr3	169482094	169483344	Peak_1077	2666	.	16.7163	266.685	262.703	462
chr17	79678707	79681286	Peak_1078	2666	.	10.9282	266.645	262.663	934
chr15	29561223	29562201	Peak_1079	2665	.	17.3035	266.518	262.536	557
chr10	71905207	71906621	Peak_1080	2664	.	12.2088	266.458	262.476	588
chr21	47742975	47744014	Peak_1081	2663	.	14.3609	266.371	262.39	625
chr17	17206357	17207378	Peak_1082	2663	.	15.622	266.336	262.355	476
chr20	47804185	47805356	Peak_1083	2660	.	19.3285	266.043	262.063	429
chr16	2273404	2274931	Peak_1084	2659	.	11.5113	265.982	262.002	336
chr5	891960	893932	Peak_1085	2657	.	14.4298	265.751	261.772	847
chr20	34541111	34543019	Peak_1086	2657	.	13.7894	265.736	261.757	830
chr17	73871655	73875124	Peak_1087	2657	.	9.70838	265.7	261.721	2484
chr2	98611526	98613048	Peak_1088	2656	.	12.7116	265.665	261.687	581
chr17	61677934	61679346	Peak_1089	2655	.	10.4147	265.597	261.619	372
chr17	1587441	1588440	Peak_1090	2653	.	12.4482	265.379	261.402	548
chr14	21851399	21852429	Peak_1091	2653	.	12.1692	265.357	261.379	723
chr5	176852963	176854429	Peak_1092	2652	.	14.6356	265.291	261.313	926
chr17	43224192	43225391	Peak_1093	2651	.	15.4487	265.192	261.215	420
chr1	2343040	2345945	Peak_1094	2647	.	13.3867	264.771	260.795	671
chr19	8069460	8071144	Peak_1095	2646	.	19.0028	264.608	260.633	811
chr11	9594617	9596993	Peak_1096	2646	.	15.1355	264.607	260.632	854
chr1	161409743	161410675	Peak_1097	2642	.	18.6211	264.252	260.278	620
chr22	31795098	31796548	Peak_1098	2642	.	11.0767	264.225	260.251	693
chr1	17240391	17241283	Peak_1099	2640	.	13.6316	264.038	260.065	484
chr8	131454973	131456411	Peak_1100	2640	.	11.1011	264.025	260.052	831
chr9	5437381	5438145	Peak_1101	2639	.	13.8848	263.922	259.95	414
chrX	130036804	130037472	Peak_1102	2638	.	21.1703	263.857	259.885	332
chr17	4692809	4693891	Peak_1103	2638	.	12.3904	263.808	259.836	670
chr19	8673956	8675196	Peak_1104	2637	.	15.1174	263.761	259.789	472
chr9	100458880	100459979	Peak_1105	2635	.	12.8816	263.503	259.531	527
chr14	23770613	23772296	Peak_1106	2634	.	15.0516	263.408	259.437	752
chr7	87848750	87849673	Peak_1107	2630	.	14.611	263.06	259.09	458
chr9	90340851	90341818	Peak_1108	2630	.	14.611	263.06	259.09	474
chr20	2820658	2821869	Peak_1109	2628	.	14.2328	262.85	258.88	421
chr1	36928979	36930415	Peak_1110	2627	.	13.9856	262.783	258.814	870
chr10	60144605	60145909	Peak_1111	2627	.	17.7789	262.725	258.757	813
chr16	575723	578913	Peak_1112	2624	.	21.0303	262.499	258.53	1436
chr2	47596017	47597472	Peak_1113	2621	.	15.9727	262.123	258.156	1060
chr18	23669921	23671437	Peak_1114	2620	.	12.8582	262.001	258.035	500
chr11	66111999	66113136	Peak_1115	2616	.	11.3847	261.693	257.727	733
chr9	139008990	139011886	Peak_1116	2616	.	13.8356	261.603	257.638	1443
chr7	139762161	139763315	Peak_1117	2613	.	15.7261	261.374	257.41	480
chr17	62971041	62972512	Peak_1118	2613	.	9.22969	261.311	257.346	981
chr16	68877252	68878233	Peak_1119	2608	.	12.8363	260.876	256.914	406
chr5	1881695	1884219	Peak_1120	2607	.	15.8111	260.728	256.766	645
chr3	196014054	196015265	Peak_1121	2607	.	13.3266	260.706	256.744	813
chr9	130889481	130890361	Peak_1122	2605	.	13.0659	260.54	256.578	387
chr2	157291969	157293276	Peak_1123	2604	.	13.4453	260.492	256.53	580
chr15	25682974	25684960	Peak_1124	2603	.	18.429	260.366	256.405	556
chr2	73338860	73340926	Peak_1125	2598	.	14.2483	259.874	255.915	775
chr17	79478787	79483221	Peak_1126	2595	.	11.4314	259.566	255.607	769
chr16	1819155	1824338	Peak_1127	2595	.	13.1067	259.505	255.546	3812
chr8	22422196	22424093	Peak_1128	2594	.	14.8339	259.494	255.536	1345
chr12	12965947	12966826	Peak_1129	2593	.	13.398	259.347	255.389	493
chr7	99155683	99157233	Peak_1130	2593	.	11.7697	259.336	255.379	909
chr19	32895352	32897363	Peak_1131	2589	.	15.606	258.941	254.985	870
chr7	102715219	102716436	Peak_1132	2589	.	15.606	258.941	254.985	490
chr5	132165560	132167028	Peak_1133	2587	.	14.1964	258.703	254.747	454
chr8	22297725	22299438	Peak_1134	2587	.	14.1705	258.703	254.747	945
chr4	39459859	39460939	Peak_1135	2586	.	12.7704	258.63	254.674	469
chr15	41098749	41099924	Peak_1136	2582	.	12.2059	258.284	254.33	706
chr9	86595035	86596429	Peak_1137	2582	.	19.0838	258.206	254.251	906
chr8	102504698	102506790	Peak_1138	2578	.	12.4784	257.859	253.906	1316
chr11	449633	451229	Peak_1139	2578	.	13.5156	257.834	253.881	832
chr17	30668246	30669722	Peak_1140	2578	.	11.4875	257.802	253.85	894
chr22	21982320	21984515	Peak_1141	2577	.	13.3359	257.784	253.832	1127
chr16	1132213	1133928	Peak_1142	2577	.	10.7275	257.702	253.75	619
chr22	20103410	20105877	Peak_1143	2574	.	14.5933	257.468	253.516	1890
chr18	72163357	72164612	Peak_1144	2574	.	15.2856	257.468	253.516	443
chr3	82035021	82036367	Peak_1145	2570	.	14.0279	257.007	253.057	387
chr8	37593694	37594723	Peak_1146	2564	.	13.6964	256.429	252.481	573
chr8	118532824	118533581	Peak_1147	2563	.	10.1996	256.382	252.434	302
chr1	173990621	173992042	Peak_1148	2563	.	11.2581	256.358	252.41	437
chr17	45607889	45609714	Peak_1149	2561	.	18.4047	256.159	252.211	1128
chr11	66823503	66824906	Peak_1150	2561	.	11.8769	256.154	252.206	941
chr16	3199106	3200701	Peak_1151	2559	.	12.4673	255.921	251.974	697
chr16	88636075	88637540	Peak_1152	2558	.	11.595	255.878	251.932	931
chr18	48555937	48557355	Peak_1153	2557	.	14.2178	255.787	251.841	806
chr14	102552608	102554241	Peak_1154	2556	.	15.7908	255.602	251.657	484
chr10	43857277	43858526	Peak_1155	2555	.	11.5277	255.556	251.61	783
chr22	19418056	19420355	Peak_1156	2553	.	14.8092	255.397	251.452	1402
chr13	96328723	96330177	Peak_1157	2553	.	16.8965	255.307	251.363	915
chr16	18801025	18802342	Peak_1158	2552	.	12.6606	255.269	251.325	382
chr18	22006111	22007345	Peak_1159	2550	.	17.4172	255.091	251.147	410
chr3	42844852	42846423	Peak_1160	2547	.	13.2562	254.78	250.837	855
chr2	96930859	96932615	Peak_1161	2546	.	13.951	254.679	250.736	1327
chr11	120894605	120895705	Peak_1162	2546	.	13.5651	254.676	250.733	349
chr4	6717717	6718710	Peak_1163	2546	.	13.5651	254.676	250.733	417
chr17	21219570	21220763	Peak_1164	2546	.	9.63773	254.642	250.7	675
chr9	80850777	80851735	Peak_1165	2545	.	13.0178	254.535	250.593	350
chr9	134614308	134615837	Peak_1166	2543	.	16.29	254.328	250.387	783
chr12	117348503	117349595	Peak_1167	2541	.	19.4188	254.174	250.233	509
chr6	107077133	107078062	Peak_1168	2541	.	12.6387	254.152	250.211	452
chr11	44117034	44118269	Peak_1169	2539	.	15.8717	253.94	250	384
chr3	32611521	32612979	Peak_1170	2539	.	16.327	253.922	249.982	496
chr21	33103299	33105445	Peak_1171	2538	.	12.9246	253.852	249.913	875
chr11	8703448	8705001	Peak_1172	2537	.	10.8035	253.715	249.776	1013
chr7	102004124	102005176	Peak_1173	2528	.	13.7759	252.9	248.963	431
chr4	1721351	1724329	Peak_1174	2527	.	13.0702	252.745	248.809	1460
chr1	226595135	226596013	Peak_1175	2525	.	17.3088	252.558	248.623	383
chr8	99057067	99058597	Peak_1176	2524	.	12.8037	252.488	248.553	500
chr5	118323702	118324486	Peak_1177	2522	.	16.4217	252.294	248.36	360
chr10	121301267	121303370	Peak_1178	2521	.	11.1316	252.11	248.177	1472
chr11	35639125	35641510	Peak_1179	2518	.	14.6411	251.832	247.9	1515
chr11	67797178	67799197	Peak_1180	2517	.	13.9372	251.702	247.769	1130
chr17	16255532	16257340	Peak_1181	2515	.	16.8918	251.593	247.661	869
chr1	47133127	47134361	Peak_1182	2512	.	12.2664	251.214	247.284	750
chr5	108063058	108064395	Peak_1183	2511	.	15.5116	251.146	247.216	884
chr19	36207084	36210034	Peak_1184	2509	.	13.4439	250.99	247.06	2043
chr16	23463877	23464688	Peak_1185	2506	.	12.8298	250.689	246.76	353
chr2	46769167	46770399	Peak_1186	2506	.	17.7277	250.663	246.734	461
chr2	61403992	61405694	Peak_1187	2506	.	14.6131	250.647	246.718	778
chr19	58873110	58874400	Peak_1188	2504	.	12.788	250.476	246.548	603
chr3	194979541	194980955	Peak_1189	2504	.	12.8108	250.476	246.548	804
chr5	472198	474122	Peak_1190	2504	.	12.8108	250.476	246.548	673
chr16	89312930	89313953	Peak_1191	2503	.	12.3175	250.378	246.45	681
chr3	39424824	39426053	Peak_1192	2502	.	10.1931	250.289	246.361	398
chr7	127031536	127033502	Peak_1193	2502	.	14.9644	250.263	246.335	423
chr17	73082384	73085236	Peak_1194	2501	.	8.59065	250.152	246.225	1759
chr11	77348388	77349096	Peak_1195	2498	.	17.1816	249.892	245.966	301
chr19	12911621	12912978	Peak_1196	2497	.	10.8662	249.738	245.813	847
chr11	70116053	70117550	Peak_1197	2496	.	18.8316	249.612	245.687	902
chr12	7078510	7080815	Peak_1198	2494	.	10.5115	249.401	245.476	1105
chr19	507300	508347	Peak_1199	2493	.	14.4491	249.373	245.448	423
chr14	105632240	105634655	Peak_1200	2493	.	12.9536	249.352	245.427	1510
chr1	27286053	27287736	Peak_1201	2492	.	16.6826	249.27	245.346	654
chr14	53161590	53162819	Peak_1202	2491	.	14.5207	249.123	245.199	681
chr7	23221234	23222472	Peak_1203	2490	.	13.067	249.099	245.175	668
chr16	31224973	31227180	Peak_1204	2485	.	12.441	248.581	244.659	1192
chr5	132386745	132388719	Peak_1205	2485	.	12.441	248.581	244.659	644
chr3	50377704	50378757	Peak_1206	2485	.	11.4431	248.55	244.628	424
chr9	134268513	134271317	Peak_1207	2482	.	16.641	248.236	244.315	1540
chr8	48649687	48651733	Peak_1208	2482	.	14.2578	248.215	244.294	808
chr9	140472641	140473905	Peak_1209	2482	.	13.3232	248.205	244.285	569
chr19	7981011	7983168	Peak_1210	2479	.	13.0197	247.966	244.046	1635
chr6	28234763	28235473	Peak_1211	2479	.	13.0197	247.966	244.046	294
chr11	113185018	113186142	Peak_1212	2479	.	11.6734	247.908	243.988	543
chr2	3622480	3623958	Peak_1213	2478	.	14.9061	247.872	243.952	548
chr1	47799170	47800615	Peak_1214	2477	.	13.6692	247.726	243.807	574
chr15	74218598	74220507	Peak_1215	2475	.	14.0541	247.554	243.635	1425
chr12	56109575	56110482	Peak_1216	2473	.	9.81585	247.312	243.394	431
chr12	751569	753003	Peak_1217	2472	.	13.3507	247.239	243.321	562
chr19	57831410	57832773	Peak_1218	2468	.	11.6139	246.828	242.911	608
chr10	102820668	102823103	Peak_1219	2467	.	10.5327	246.785	242.868	1749
chr10	5854545	5856449	Peak_1220	2465	.	13.6436	246.571	242.656	1229
chr2	135676246	135677245	Peak_1221	2465	.	13.6436	246.571	242.656	431
chr17	76209879	76210987	Peak_1222	2465	.	9.51656	246.558	242.642	644
chr20	61556801	61558143	Peak_1223	2464	.	14.0735	246.446	242.531	916
chr14	92505730	92506822	Peak_1224	2464	.	10.5985	246.424	242.509	530
chr2	232825802	232826972	Peak_1225	2459	.	11.9494	245.945	242.031	712
chr13	25874949	25876504	Peak_1226	2457	.	12.0968	245.711	241.798	1134
chr1	53685344	53687020	Peak_1227	2457	.	12.9251	245.705	241.792	909
chr3	196044420	196045568	Peak_1228	2457	.	12.9251	245.705	241.792	594
chr20	35490367	35492695	Peak_1229	2455	.	14.695	245.565	241.652	1389
chr17	29922759	29924230	Peak_1230	2455	.	13.2454	245.511	241.599	1012
chr5	162886562	162887417	Peak_1231	2455	.	13.27	245.511	241.599	444
chr8	133787402	133788293	Peak_1232	2453	.	10.5644	245.387	241.476	434
chr4	2010362	2011793	Peak_1233	2449	.	12.3778	244.941	241.03	828
chr14	24550142	24551238	Peak_1234	2447	.	13.894	244.702	240.792	488
chr5	177658756	177660711	Peak_1235	2447	.	13.9206	244.702	240.792	1009
chr5	140699716	140700549	Peak_1236	2446	.	12.0544	244.614	240.704	405
chr17	49243589	49244767	Peak_1237	2443	.	10.6394	244.358	240.449	498
chr5	32312184	32313220	Peak_1238	2443	.	13.3358	244.317	240.408	554
chr11	30344380	30345290	Peak_1239	2442	.	12.4211	244.24	240.332	396
chr5	171710019	171711284	Peak_1240	2441	.	14.4999	244.187	240.279	924
chr3	14219506	14220690	Peak_1241	2441	.	13.7715	244.141	240.233	377
chr4	71704426	71705787	Peak_1242	2441	.	18.0048	244.101	240.194	937
chr17	34899877	34902213	Peak_1243	2438	.	15.2043	243.891	239.984	1906
chr19	58896839	58899273	Peak_1244	2437	.	11.1879	243.796	239.889	1144
chr11	14379617	14380947	Peak_1245	2436	.	16.0542	243.648	239.742	804
chr1	10002842	10003787	Peak_1246	2435	.	12.012	243.518	239.612	485
chr22	20849127	20851120	Peak_1247	2434	.	12.8779	243.45	239.544	652
chr7	6143682	6145415	Peak_1248	2434	.	12.8542	243.45	239.544	484
chr17	39991683	39992916	Peak_1249	2434	.	16.1166	243.442	239.536	593
chr15	41135334	41137143	Peak_1250	2432	.	11.3086	243.2	239.295	607
chr16	87902220	87904577	Peak_1251	2431	.	10.1701	243.177	239.272	1045
chr11	4628980	4629697	Peak_1252	2431	.	14.6725	243.107	239.202	426
chr17	4268515	4270176	Peak_1253	2426	.	15.8089	242.645	238.741	405
chr17	27716784	27718271	Peak_1254	2426	.	12.5375	242.642	238.738	779
chr9	129087993	129090038	Peak_1255	2425	.	18.3051	242.583	238.68	1501
chr18	11908021	11909283	Peak_1256	2425	.	11.5147	242.518	238.615	682
chr1	27021681	27024257	Peak_1257	2425	.	17.2129	242.512	238.609	1517
chr7	30324091	30325782	Peak_1258	2424	.	16.8748	242.485	238.582	773
chr11	105948210	105949253	Peak_1259	2424	.	11.9696	242.423	238.521	499
chr10	112679331	112680136	Peak_1260	2424	.	16.0208	242.419	238.516	303
chr2	178128111	178130275	Peak_1261	2423	.	17.293	242.359	238.456	1192
chr1	39570229	39572357	Peak_1262	2420	.	17.496	242.065	238.163	1005
chr9	127630576	127632359	Peak_1263	2420	.	13.2	242.026	238.125	1104
chr1	27215973	27217182	Peak_1264	2419	.	12.2434	241.938	238.037	506
chr8	101571305	101572202	Peak_1265	2416	.	8.92901	241.68	237.78	484
chr2	171785491	171786604	Peak_1266	2412	.	12.1825	241.231	237.332	479
chr1	227057843	227059102	Peak_1267	2410	.	13.0479	241.055	237.157	724
chr2	96809897	96811396	Peak_1268	2410	.	13.1661	241.051	237.153	1067
chr6	85483145	85484688	Peak_1269	2408	.	14.2133	240.88	236.982	1045
chr17	46723120	46725161	Peak_1270	2408	.	9.27233	240.856	236.958	519
chr18	48405001	48406290	Peak_1271	2408	.	15.6162	240.815	236.918	854
chr15	40583110	40584312	Peak_1272	2407	.	13.5238	240.785	236.888	358
chr16	88520109	88522721	Peak_1273	2407	.	10.6892	240.776	236.879	2148
chr3	196438672	196440097	Peak_1274	2406	.	13.6402	240.673	236.776	798
chr9	100744665	100747853	Peak_1275	2406	.	18.5546	240.656	236.759	1684
chr12	11323566	11324396	Peak_1276	2404	.	12.4464	240.415	236.519	428
chr12	6861671	6862927	Peak_1277	2404	.	12.4464	240.415	236.519	510
chr19	1847743	1848877	Peak_1278	2404	.	12.9628	240.413	236.517	541
chr1	36106257	36107728	Peak_1279	2401	.	10.2456	240.148	236.253	719
chr12	861586	863303	Peak_1280	2400	.	15.4452	240.097	236.202	656
chr7	72992179	72993075	Peak_1281	2397	.	13.2109	239.753	235.859	484
chr17	76374465	76375382	Peak_1282	2396	.	9.35929	239.66	235.767	446
chr10	43950282	43952054	Peak_1283	2396	.	13.7824	239.631	235.738	484
chr16	89882212	89883716	Peak_1284	2395	.	11.0746	239.555	235.662	725
chr4	146018762	146020201	Peak_1285	2394	.	13.8043	239.461	235.568	824
chr7	43797838	43799029	Peak_1286	2390	.	17.1669	239.011	235.12	759
chr11	110300489	110301769	Peak_1287	2388	.	14.1649	238.867	234.976	550
chr7	75676647	75678041	Peak_1288	2387	.	12.2426	238.702	234.812	924
chr1	179050596	179052266	Peak_1289	2386	.	13.1609	238.615	234.725	746
chr12	110718253	110720201	Peak_1290	2385	.	13.3618	238.529	234.639	1382
chr3	49448691	49450288	Peak_1291	2385	.	13.3618	238.529	234.639	465
chr11	119039266	119040577	Peak_1292	2384	.	13.3563	238.473	234.584	442
chr3	121264054	121265002	Peak_1293	2383	.	15.4868	238.385	234.496	518
chr17	28927241	28928579	Peak_1294	2383	.	12.157	238.313	234.424	371
chr1	38157040	38158666	Peak_1295	2382	.	11.3759	238.227	234.339	763
chr1	1166546	1168348	Peak_1296	2381	.	12.3781	238.193	234.305	601
chr12	120632031	120633316	Peak_1297	2381	.	12.4009	238.193	234.305	676
chr16	88448858	88451115	Peak_1298	2381	.	10.0426	238.124	234.236	667
chr14	24663823	24665622	Peak_1299	2378	.	11.1549	237.881	233.994	1284
chr10	1101850	1102991	Peak_1300	2378	.	12.6887	237.833	233.946	550
chr12	49075274	49076201	Peak_1301	2378	.	12.665	237.833	233.946	515
chr2	74667346	74669952	Peak_1302	2378	.	12.6887	237.833	233.946	702
chr2	131099234	131101016	Peak_1303	2374	.	12.6286	237.438	233.552	1425
chr3	184032247	184033620	Peak_1304	2373	.	13.3106	237.386	233.5	602
chr12	102090530	102092428	Peak_1305	2373	.	17.0297	237.31	233.424	1130
chr8	142010228	142012297	Peak_1306	2372	.	13.6027	237.245	233.359	921
chr3	49966808	49967670	Peak_1307	2372	.	10.5325	237.233	233.348	397
chr8	101321311	101322869	Peak_1308	2372	.	9.05262	237.225	233.34	737
chr2	86849806	86851813	Peak_1309	2371	.	14.439	237.182	233.298	828
chr8	17103685	17105162	Peak_1310	2371	.	11.3362	237.158	233.273	936
chr2	38603326	38604506	Peak_1311	2371	.	16.4402	237.114	233.229	813
chr1	115052765	115054272	Peak_1312	2370	.	13.0049	237	233.116	765
chr9	136999897	137002362	Peak_1313	2365	.	14.807	236.583	232.7	755
chr1	117451968	117453598	Peak_1314	2365	.	14.3259	236.558	232.675	936
chr8	145689301	145690992	Peak_1315	2365	.	10.8301	236.524	232.641	1315
chr15	49447000	49448090	Peak_1316	2364	.	11.5502	236.49	232.607	488
chr17	76164409	76165610	Peak_1317	2362	.	10.1254	236.28	232.398	387
chr12	6450042	6451411	Peak_1318	2358	.	10.3458	235.873	231.993	768
chr5	180669731	180671135	Peak_1319	2357	.	11.078	235.762	231.882	858
chr9	98637104	98638865	Peak_1320	2356	.	19.5836	235.661	231.781	1319
chr12	108079295	108080245	Peak_1321	2355	.	10.8541	235.502	231.622	387
chr7	16460124	16461910	Peak_1322	2354	.	15.9993	235.436	231.557	660
chr17	43393648	43394543	Peak_1323	2354	.	11.5092	235.413	231.534	482
chr11	63933058	63934575	Peak_1324	2354	.	15.3224	235.409	231.53	724
chr15	90118538	90119663	Peak_1325	2353	.	15.9032	235.388	231.509	451
chr8	145021900	145025327	Peak_1326	2353	.	8.67895	235.352	231.474	1837
chr6	139308268	139309710	Peak_1327	2353	.	12.0019	235.341	231.462	660
chr10	86088142	86089379	Peak_1328	2352	.	15.1902	235.263	231.385	426
chr7	116592824	116594499	Peak_1329	2352	.	15.2221	235.263	231.385	979
chr16	30816486	30817688	Peak_1330	2350	.	10.1127	235.047	231.169	560
chr1	70670862	70671935	Peak_1331	2350	.	10.1293	235.047	231.169	625
chr12	42719310	42720280	Peak_1332	2350	.	13.9897	235.034	231.156	421
chr4	83811736	83812694	Peak_1333	2350	.	13.9618	235.034	231.156	407
chr15	85196873	85197874	Peak_1334	2350	.	11.2767	235.022	231.145	461
chr2	153573215	153574449	Peak_1335	2350	.	13.5686	235.01	231.132	548
chr22	50311553	50312669	Peak_1336	2348	.	12.2871	234.871	230.994	411
chr15	90455180	90456909	Peak_1337	2347	.	14.1307	234.78	230.904	907
chr14	45722035	45723546	Peak_1338	2343	.	11.4682	234.338	230.463	841
chr3	174158543	174159450	Peak_1339	2343	.	19.4436	234.336	230.461	470
chr8	30891172	30891922	Peak_1340	2342	.	14.8354	234.298	230.423	418
chr1	47902160	47904103	Peak_1341	2341	.	13.9688	234.194	230.319	855
chr1	63249378	63250158	Peak_1342	2340	.	15.1584	234.058	230.184	288
chr17	66097595	66098848	Peak_1343	2340	.	8.75896	234.033	230.159	376
chr4	24585232	24586753	Peak_1344	2336	.	14.293	233.645	229.772	592
chr4	57844738	57845559	Peak_1345	2335	.	15.4079	233.53	229.658	506
chr18	56338329	56339502	Peak_1346	2334	.	15.7726	233.411	229.539	643
chr1	150946038	150948024	Peak_1347	2333	.	14.9614	233.355	229.483	943
chr19	17621305	17623386	Peak_1348	2332	.	12.3031	233.262	229.391	1320
chr14	105281599	105283295	Peak_1349	2332	.	11.6293	233.257	229.386	1109
chr7	140372632	140373538	Peak_1350	2330	.	12.8274	233.047	229.177	377
chr4	140476404	140477708	Peak_1351	2330	.	13.9127	233.029	229.158	678
chr1	226496217	226497623	Peak_1352	2329	.	12.961	232.947	229.076	879
chr22	42665500	42666692	Peak_1353	2327	.	13.878	232.705	228.836	596
chr1	149981941	149982897	Peak_1354	2326	.	12.196	232.662	228.793	512
chr22	24666455	24667656	Peak_1355	2326	.	12.196	232.662	228.793	537
chr4	77227072	77228624	Peak_1356	2326	.	12.2187	232.662	228.793	402
chr8	110345769	110347090	Peak_1357	2321	.	9.72021	232.115	228.247	986
chr17	56160027	56162079	Peak_1358	2320	.	11.9141	232.059	228.192	1047
chr19	38865236	38866038	Peak_1359	2319	.	13.4421	231.999	228.132	320
chr4	144434481	144435429	Peak_1360	2318	.	11.1776	231.829	227.962	535
chr11	65819001	65820542	Peak_1361	2315	.	10.9628	231.538	227.673	1056
chr12	64845416	64846585	Peak_1362	2313	.	14.4948	231.36	227.495	660
chr16	87424807	87426927	Peak_1363	2313	.	10.3791	231.359	227.494	1313
chr5	74807160	74808224	Peak_1364	2311	.	12.4286	231.137	227.273	692
chr3	120314993	120315739	Peak_1365	2309	.	11.8702	230.968	227.105	389
chr19	1468130	1471576	Peak_1366	2308	.	12.9351	230.835	226.972	1082
chr17	29151216	29152919	Peak_1367	2307	.	12.729	230.799	226.936	742
chr6	42945926	42947403	Peak_1368	2307	.	12.7536	230.799	226.936	776
chr8	135725152	135726055	Peak_1369	2307	.	12.7536	230.799	226.936	362
chr13	114143810	114146359	Peak_1370	2307	.	14.3185	230.731	226.869	1653
chr15	75493887	75495917	Peak_1371	2304	.	13.049	230.498	226.637	583
chr1	11159276	11160435	Peak_1372	2304	.	12.1277	230.459	226.597	426
chrX	118708463	118709444	Peak_1373	2303	.	19.2102	230.372	226.511	590
chr1	28285845	28287287	Peak_1374	2302	.	12.0593	230.28	226.419	774
chr7	116502339	116503512	Peak_1375	2301	.	14.1763	230.12	226.26	564
chr2	232571017	232576027	Peak_1376	2300	.	11.5035	230.023	226.163	516
chr1	36915311	36916564	Peak_1377	2299	.	10.1545	229.971	226.112	667
chr20	62371250	62372899	Peak_1378	2297	.	11.0983	229.706	225.847	1094
chr9	138985666	138988202	Peak_1379	2296	.	12.7044	229.676	225.817	540
chr11	2398244	2399590	Peak_1380	2296	.	13.5485	229.605	225.746	697
chr2	27651259	27652531	Peak_1381	2295	.	13.7727	229.543	225.685	501
chr5	271537	272436	Peak_1382	2292	.	15.6299	229.273	225.416	349
chr20	17948663	17950097	Peak_1383	2292	.	12.2775	229.236	225.379	574
chr15	90808051	90809632	Peak_1384	2289	.	13.6453	228.991	225.135	913
chr8	144365097	144366307	Peak_1385	2289	.	10.2866	228.991	225.135	630
chr6	157342009	157343449	Peak_1386	2289	.	11.3247	228.979	225.123	483
chr3	196668933	196670188	Peak_1387	2289	.	12.3577	228.916	225.06	852
chr17	55926528	55928253	Peak_1388	2287	.	8.14139	228.739	224.884	1269
chr1	213188259	213190051	Peak_1389	2287	.	15.0985	228.721	224.866	372
chr16	84537551	84539623	Peak_1390	2285	.	8.86136	228.567	224.712	1063
chr16	70322708	70323590	Peak_1391	2285	.	12.6552	228.555	224.7	546
chr19	35224861	35225669	Peak_1392	2285	.	12.3221	228.53	224.676	400
chr19	8372726	8373500	Peak_1393	2280	.	11.9916	228.088	224.234	358
chr16	3332406	3334463	Peak_1394	2280	.	14.9034	228.057	224.204	1281
chr14	53173431	53174536	Peak_1395	2280	.	10.4445	228.048	224.195	631
chr9	35688983	35690192	Peak_1396	2279	.	10.0862	227.936	224.083	668
chr14	50100253	50102463	Peak_1397	2278	.	12.3104	227.807	223.955	611
chr7	43622516	43623444	Peak_1398	2277	.	14.0887	227.778	223.926	464
chrX	71933555	71934388	Peak_1399	2277	.	19.1169	227.738	223.886	399
chr11	62553811	62555356	Peak_1400	2277	.	10.9183	227.703	223.851	705
chr17	56083614	56084795	Peak_1401	2274	.	9.11632	227.481	223.63	728
chr2	179315059	179316844	Peak_1402	2274	.	12.606	227.436	223.585	1134
chr21	45431585	45433079	Peak_1403	2273	.	13.4666	227.303	223.453	366
chr1	228674979	228675876	Peak_1404	2270	.	15.1435	227.058	223.208	301
chr2	10974985	10975946	Peak_1405	2270	.	13.9037	227.019	223.169	452
chr6	8435198	8436504	Peak_1406	2269	.	10.2339	226.942	223.093	762
chr4	4860956	4862869	Peak_1407	2269	.	13.6544	226.909	223.06	567
chr3	10289897	10290940	Peak_1408	2268	.	11.2633	226.844	222.996	318
chr17	80249971	80251051	Peak_1409	2263	.	9.70608	226.354	222.507	498
chr18	811589	812943	Peak_1410	2261	.	15.4331	226.104	222.258	476
chr16	57219029	57220849	Peak_1411	2260	.	11.9683	226.068	222.222	572
chr4	164087160	164088670	Peak_1412	2260	.	14.1408	226.032	222.186	679
chr1	8762804	8763716	Peak_1413	2260	.	12.8751	226.026	222.18	414
chr2	44395952	44396996	Peak_1414	2260	.	16.7383	226.007	222.162	606
chr1	27868683	27870239	Peak_1415	2259	.	10.4083	225.985	222.14	799
chr16	83841471	83842834	Peak_1416	2259	.	11.68	225.94	222.095	341
chr10	119805407	119807133	Peak_1417	2259	.	10.035	225.905	222.06	906
chr22	38239629	38240491	Peak_1418	2259	.	10.035	225.905	222.06	498
chr13	100631738	100635472	Peak_1419	2257	.	14.0411	225.797	221.953	2960
chr5	72143770	72145019	Peak_1420	2257	.	14.0119	225.797	221.953	510
chr6	3258980	3260153	Peak_1421	2255	.	16.2062	225.587	221.743	453
chr16	67875359	67876733	Peak_1422	2254	.	13.9719	225.441	221.597	960
chr16	67312239	67313976	Peak_1423	2254	.	12.6353	225.409	221.566	939
chr3	131221202	131222009	Peak_1424	2253	.	15.2526	225.367	221.524	427
chr14	31925974	31926914	Peak_1425	2250	.	9.70097	225.018	221.176	555
chr13	49106660	49107529	Peak_1426	2250	.	14.6161	225.002	221.16	425
chr14	77278479	77279720	Peak_1427	2248	.	12.8495	224.897	221.056	539
chr16	770007	771869	Peak_1428	2248	.	12.4428	224.865	221.023	1207
chr13	21099248	21100333	Peak_1429	2248	.	12.8442	224.844	221.002	532
chr1	193027618	193029460	Peak_1430	2247	.	8.76572	224.748	220.907	1448
chr8	145697352	145698919	Peak_1431	2246	.	10.3329	224.665	220.824	903
chr5	1344191	1345876	Peak_1432	2246	.	13.0995	224.651	220.811	1223
chr11	65487311	65488407	Peak_1433	2246	.	13.9826	224.63	220.789	747
chr9	139837846	139839372	Peak_1434	2240	.	12.4831	224.085	220.246	962
chr14	24024913	24026111	Peak_1435	2237	.	12.8239	223.77	219.933	419
chr17	74448266	74449408	Peak_1436	2237	.	10.3238	223.761	219.923	813
chr17	79212273	79214273	Peak_1437	2236	.	10.2619	223.68	219.843	1066
chr7	48018191	48019436	Peak_1438	2235	.	13.1676	223.554	219.718	852
chr2	219757184	219758314	Peak_1439	2233	.	13.1201	223.353	219.517	577
chr8	77912362	77913253	Peak_1440	2231	.	9.49952	223.165	219.33	480
chr16	30885973	30888398	Peak_1441	2230	.	12.3889	223.099	219.264	591
chr3	50374103	50376380	Peak_1442	2230	.	12.3889	223.099	219.264	1251
chr1	153949235	153950463	Peak_1443	2229	.	12.4585	222.971	219.136	615
chr14	104028100	104030318	Peak_1444	2229	.	11.3761	222.939	219.104	626
chr12	2904036	2905343	Peak_1445	2229	.	15.1983	222.905	219.07	418
chr1	151137670	151138690	Peak_1446	2228	.	9.9496	222.868	219.034	617
chr17	46125021	46126475	Peak_1447	2228	.	9.9496	222.868	219.034	811
chr18	12948046	12948960	Peak_1448	2227	.	16.1364	222.708	218.875	490
chr14	105486095	105488207	Peak_1449	2226	.	12.7727	222.645	218.811	940
chr1	6265615	6266825	Peak_1450	2224	.	10.998	222.444	218.612	788
chr7	26241096	26242283	Peak_1451	2224	.	13.1142	222.417	218.584	830
chr10	99205763	99206500	Peak_1452	2223	.	11.4724	222.374	218.542	317
chr9	127702776	127703978	Peak_1453	2223	.	10.8999	222.316	218.483	697
chr8	64080369	64081797	Peak_1454	2222	.	12.1212	222.284	218.452	430
chr1	33721123	33722801	Peak_1455	2220	.	17.3477	222.092	218.261	369
chr14	89290795	89291558	Peak_1456	2218	.	12.4093	221.858	218.028	383
chr4	77134258	77135797	Peak_1457	2218	.	12.4339	221.858	218.028	848
chr3	12525743	12526686	Peak_1458	2218	.	10.1109	221.842	218.011	411
chr14	77924192	77925298	Peak_1459	2216	.	11.5271	221.619	217.789	441
chr19	47249086	47249948	Peak_1460	2216	.	13.7873	221.601	217.772	387
chr10	62492609	62493605	Peak_1461	2215	.	12.7471	221.521	217.691	655
chr17	17493678	17496089	Peak_1462	2215	.	12.7471	221.521	217.691	1280
chr12	684134	686086	Peak_1463	2214	.	12.7162	221.468	217.638	1230
chr8	21867219	21868767	Peak_1464	2214	.	12.7162	221.468	217.638	847
chr19	42580117	42580970	Peak_1465	2214	.	14.0436	221.416	217.587	372
chr1	24069456	24070698	Peak_1466	2213	.	14.2192	221.375	217.546	637
chr2	231191411	231192316	Peak_1467	2212	.	14.2514	221.26	217.432	541
chr16	58767237	58768588	Peak_1468	2212	.	11.5408	221.207	217.379	763
chr12	112279451	112281065	Peak_1469	2210	.	14.9133	221.054	217.226	814
chr18	60986954	60988413	Peak_1470	2208	.	18.687	220.852	217.025	707
chr1	212605953	212606964	Peak_1471	2207	.	12.3601	220.747	216.921	420
chr1	161368647	161369445	Peak_1472	2206	.	11.7861	220.61	216.784	366
chr3	40565777	40567338	Peak_1473	2206	.	11.8089	220.61	216.784	438
chr9	140916900	140918811	Peak_1474	2205	.	15.4369	220.554	216.728	888
chr13	45563165	45564417	Peak_1475	2200	.	10.6169	220.026	216.202	716
chr3	61235563	61236333	Peak_1476	2199	.	13.7776	219.975	216.152	366
chr5	150079981	150080783	Peak_1477	2199	.	13.7776	219.975	216.152	413
chr17	48555524	48556598	Peak_1478	2198	.	7.54587	219.9	216.077	603
chr17	77774401	77775569	Peak_1479	2198	.	9.35253	219.876	216.052	493
chr1	35733972	35735067	Peak_1480	2198	.	15.655	219.872	216.049	598
chr15	72564216	72565638	Peak_1481	2197	.	12.2669	219.771	215.948	463
chr1	215740447	215741590	Peak_1482	2197	.	12.0392	219.71	215.887	513
chr18	77438597	77440359	Peak_1483	2195	.	15.1859	219.57	215.748	516
chr8	143483972	143485272	Peak_1484	2194	.	10.9078	219.414	215.592	851
chr3	121467812	121468702	Peak_1485	2192	.	9.38917	219.218	215.397	378
chr4	140216225	140217147	Peak_1486	2191	.	10.781	219.168	215.347	581
chr2	24148881	24150516	Peak_1487	2190	.	11.475	219.052	215.232	786
chr4	144106042	144107269	Peak_1488	2188	.	13.7484	218.815	214.996	314
chr7	149320974	149322464	Peak_1489	2186	.	12.2425	218.665	214.846	673
chr19	18271155	18272424	Peak_1490	2186	.	13.2306	218.653	214.835	829
chr17	48624320	48625295	Peak_1491	2185	.	10.2322	218.593	214.774	299
chr20	62612235	62612951	Peak_1492	2185	.	12.311	218.529	214.71	404
chr4	108910752	108911714	Peak_1493	2185	.	12.2864	218.529	214.71	539
chr2	191744906	191746844	Peak_1494	2184	.	11.7178	218.436	214.618	1375
chr14	50359031	50361006	Peak_1495	2183	.	10.9969	218.358	214.54	1222
chr8	144766166	144766945	Peak_1496	2183	.	8.8446	218.33	214.512	292
chr7	107220353	107221307	Peak_1497	2181	.	12.619	218.157	214.34	449
chr8	145549713	145551477	Peak_1498	2181	.	8.60178	218.106	214.289	1029
chr22	39095809	39097704	Peak_1499	2180	.	14.3238	218.081	214.264	835
chr16	24740707	24741662	Peak_1500	2180	.	17.1479	218.068	214.251	446
chr19	48996708	48998009	Peak_1501	2179	.	13.1883	217.997	214.18	339
chr17	73126973	73128421	Peak_1502	2179	.	9.66408	217.923	214.107	737
chr7	2598445	2599855	Peak_1503	2178	.	12.0577	217.89	214.074	518
chr13	113950951	113952018	Peak_1504	2176	.	13.6898	217.657	213.842	380
chr12	57038882	57040250	Peak_1505	2176	.	11.2065	217.602	213.787	757
chr4	17811731	17813321	Peak_1506	2174	.	9.21592	217.471	213.656	514
chr17	74067930	74069197	Peak_1507	2173	.	10.3765	217.398	213.584	575
chr7	44620747	44622076	Peak_1508	2173	.	10.9354	217.303	213.489	933
chr16	1178450	1180581	Peak_1509	2172	.	12.3612	217.258	213.444	869
chr9	32552131	32552806	Peak_1510	2171	.	17.3473	217.176	213.362	340
chr13	47370606	47371805	Peak_1511	2171	.	11.8346	217.156	213.343	476
chr11	118400943	118403160	Peak_1512	2170	.	11.321	217.012	213.199	642
chr17	40427760	40429113	Peak_1513	2169	.	16.2316	216.969	213.157	463
chr12	69979062	69979876	Peak_1514	2169	.	10.5017	216.913	213.1	395
chr11	62572332	62573174	Peak_1515	2168	.	11.7728	216.804	212.991	427
chr4	111117159	111119142	Peak_1516	2167	.	11.932	216.795	212.983	821
chr22	24951294	24952325	Peak_1517	2167	.	13.5198	216.768	212.956	409
chr16	67595510	67597600	Peak_1518	2167	.	14.2708	216.723	212.911	1592
chr8	28269049	28270195	Peak_1519	2167	.	13.7559	216.706	212.894	670
chr5	179231653	179235358	Peak_1520	2166	.	14.7297	216.65	212.839	2257
chr1	150551141	150552674	Peak_1521	2165	.	13.2352	216.566	212.755	761
chr10	94351109	94352361	Peak_1522	2165	.	14.0669	216.565	212.753	321
chr19	2426795	2428081	Peak_1523	2165	.	11.1429	216.538	212.727	921
chr1	6760917	6762362	Peak_1524	2164	.	11.6668	216.46	212.65	749
chr11	82782895	82783773	Peak_1525	2164	.	11.1333	216.424	212.613	399
chr8	145633933	145635641	Peak_1526	2162	.	9.70515	216.262	212.452	728
chr17	76309746	76310597	Peak_1527	2161	.	10.2842	216.165	212.355	460
chr16	46722360	46724376	Peak_1528	2159	.	9.61683	215.97	212.161	492
chr14	39644137	39645194	Peak_1529	2158	.	11.4839	215.801	211.993	394
chr14	77842679	77844081	Peak_1530	2158	.	11.4839	215.801	211.993	591
chr1	93297360	93298325	Peak_1531	2157	.	10.2766	215.785	211.976	296
chr12	65173979	65175475	Peak_1532	2155	.	14.5161	215.592	211.785	925
chr1	17026567	17028664	Peak_1533	2154	.	7.11582	215.492	211.685	1075
chr19	59055583	59056700	Peak_1534	2154	.	12.4101	215.448	211.641	384
chr2	204103311	204104383	Peak_1535	2154	.	12.4101	215.448	211.641	537
chr16	68119169	68120186	Peak_1536	2153	.	14.0362	215.395	211.588	425
chr5	175787884	175789055	Peak_1537	2152	.	12.1634	215.212	211.405	745
chr14	69657965	69659001	Peak_1538	2151	.	10.8944	215.197	211.391	625
chr4	7069043	7070901	Peak_1539	2151	.	10.5301	215.174	211.368	473
chr11	34937221	34938937	Peak_1540	2150	.	10.7561	215.084	211.279	478
chr18	21851275	21852316	Peak_1541	2149	.	16.533	214.973	211.167	590
chr2	220093540	220094628	Peak_1542	2148	.	12.4653	214.806	211.001	767
chr16	278702	279641	Peak_1543	2146	.	18.3702	214.674	210.869	603
chr13	25086282	25087324	Peak_1544	2145	.	12.669	214.501	210.696	432
chr9	86321882	86323749	Peak_1545	2144	.	11.3843	214.412	210.609	794
chr1	11119123	11120673	Peak_1546	2141	.	13.5434	214.19	210.387	799
chr16	53468126	53469226	Peak_1547	2141	.	13.5434	214.19	210.387	545
chr4	154265458	154266559	Peak_1548	2141	.	13.5434	214.19	210.387	570
chr9	125693162	125694398	Peak_1549	2141	.	11.5584	214.105	210.302	492
chr4	2757608	2758544	Peak_1550	2139	.	13.2788	213.951	210.149	279
chr11	69489092	69490608	Peak_1551	2136	.	11.3213	213.689	209.888	870
chr9	19229795	19231442	Peak_1552	2136	.	12.9483	213.618	209.817	1175
chr4	54243643	54244625	Peak_1553	2133	.	11.0369	213.356	209.556	474
chr19	42363854	42365313	Peak_1554	2133	.	10.5312	213.328	209.528	563
chr9	34125543	34127984	Peak_1555	2132	.	14.419	213.226	209.426	884
chr12	2921624	2922557	Peak_1556	2131	.	9.39358	213.124	209.325	340
chr16	30388892	30390167	Peak_1557	2130	.	10.8329	213.097	209.298	469
chr9	140082614	140083935	Peak_1558	2130	.	10.8329	213.097	209.298	721
chr9	96337833	96339988	Peak_1559	2130	.	13.9132	213.059	209.26	752
chr1	112297860	112299190	Peak_1560	2130	.	15.1458	213.057	209.258	890
chr1	153930280	153931365	Peak_1561	2127	.	10.1835	212.713	208.916	730
chr16	3029421	3031379	Peak_1562	2126	.	11.2774	212.621	208.824	1339
chr5	10353046	10354661	Peak_1563	2126	.	11.2554	212.621	208.824	467
chr8	141520608	141522635	Peak_1564	2124	.	10.2817	212.469	208.672	934
chr1	156697858	156699076	Peak_1565	2124	.	12.0912	212.436	208.639	596
chr11	75110406	75111130	Peak_1566	2123	.	9.21578	212.356	208.56	332
chr12	98987251	98988389	Peak_1567	2119	.	10.6755	211.95	208.155	357
chr7	100032870	100034184	Peak_1568	2118	.	12.9542	211.828	208.034	641
chr8	145063924	145065458	Peak_1569	2117	.	10.1716	211.782	207.988	570
chr11	125495173	125495970	Peak_1570	2115	.	11.2334	211.554	207.761	400
chr17	74099024	74100685	Peak_1571	2112	.	8.80634	211.298	207.506	1147
chr19	45682018	45683458	Peak_1572	2110	.	12.2583	211.012	207.221	920
chr9	135544857	135546908	Peak_1573	2109	.	14.5845	210.992	207.2	1169
chr17	2626867	2628490	Peak_1574	2109	.	14.4177	210.982	207.19	1075
chr16	30418357	30419695	Peak_1575	2109	.	13.4895	210.926	207.134	666
chr17	40020810	40021966	Peak_1576	2109	.	12.7271	210.902	207.11	609
chr4	146100551	146102378	Peak_1577	2108	.	13.0117	210.872	207.081	687
chr19	55769751	55771624	Peak_1578	2108	.	11.4446	210.871	207.08	482
chr5	131892411	131893561	Peak_1579	2108	.	11.4446	210.871	207.08	362
chr20	32950951	32952067	Peak_1580	2108	.	14.0197	210.855	207.065	461
chr7	134854218	134856032	Peak_1581	2104	.	15.545	210.441	206.652	963
chr12	49245425	49246153	Peak_1582	2102	.	11.7715	210.238	206.45	402
chr5	179718348	179719871	Peak_1583	2101	.	15.191	210.16	206.372	1137
chr6	125282847	125284523	Peak_1584	2099	.	12.6331	209.998	206.21	911
chr16	21530905	21533311	Peak_1585	2098	.	10.0281	209.855	206.067	1061
chr17	21116677	21118464	Peak_1586	2098	.	9.60806	209.835	206.047	572
chr8	67624355	67625503	Peak_1587	2097	.	10.2984	209.799	206.012	627
chr7	6048133	6049490	Peak_1588	2097	.	11.4218	209.796	206.009	1001
chr15	40803569	40805146	Peak_1589	2097	.	11.9667	209.712	205.926	420
chr1	95699288	95700377	Peak_1590	2096	.	14.2249	209.687	205.901	677
chr1	151881497	151882531	Peak_1591	2093	.	13.08	209.388	205.603	310
chr21	40684927	40685966	Peak_1592	2093	.	15.8194	209.365	205.58	499
chr11	6623995	6625201	Peak_1593	2092	.	12.286	209.25	205.465	696
chr3	107940693	107941503	Peak_1594	2089	.	9.41484	208.999	205.215	454
chr11	76571402	76572871	Peak_1595	2087	.	13.1744	208.744	204.961	643
chr11	32604833	32606004	Peak_1596	2087	.	11.3763	208.722	204.939	653
chr12	69201696	69202757	Peak_1597	2086	.	10.2711	208.669	204.886	389
chr17	80063444	80064959	Peak_1598	2086	.	7.40616	208.662	204.879	650
chr19	58739860	58741153	Peak_1599	2086	.	9.88393	208.656	204.873	506
chr15	67356488	67359237	Peak_1600	2084	.	8.73316	208.439	204.657	1048
chr17	65240636	65242987	Peak_1601	2084	.	12.816	208.435	204.653	458
chr10	43633213	43634547	Peak_1602	2082	.	13.0516	208.251	204.47	461
chr21	45078628	45080660	Peak_1603	2080	.	10.8673	208.079	204.298	765
chr8	145746603	145749011	Peak_1604	2078	.	9.30226	207.814	204.034	1754
chr16	30456345	30457370	Peak_1605	2077	.	10.5344	207.789	204.009	546
chr22	46448267	46451276	Peak_1606	2076	.	13.4649	207.667	203.888	1622
chr15	40697744	40698736	Peak_1607	2076	.	11.3535	207.65	203.871	516
chr14	102785873	102787189	Peak_1608	2076	.	14.2438	207.622	203.843	542
chr11	67980101	67982021	Peak_1609	2074	.	14.8353	207.49	203.711	1097
chr20	7999595	8000608	Peak_1610	2074	.	10.9967	207.446	203.668	582
chr20	42838681	42839551	Peak_1611	2071	.	10.9052	207.178	203.4	511
chr6	127663988	127664803	Peak_1612	2070	.	11.5774	207.004	203.227	323
chr8	144328984	144329840	Peak_1613	2069	.	8.55865	206.926	203.149	386
chr1	8937207	8939549	Peak_1614	2068	.	12.6755	206.856	203.079	1246
chr14	105260964	105261950	Peak_1615	2067	.	11.954	206.731	202.955	614
chr14	100751419	100752595	Peak_1616	2066	.	10.7487	206.663	202.887	498
chr7	150784002	150785672	Peak_1617	2066	.	12.8762	206.642	202.866	642
chr22	51020277	51022158	Peak_1618	2066	.	10.1943	206.621	202.845	1461
chr7	43945453	43946702	Peak_1619	2065	.	15.0126	206.546	202.77	639
chr1	6295327	6296226	Peak_1620	2064	.	11.8437	206.43	202.655	483
chr2	228336645	228337676	Peak_1621	2063	.	13.3118	206.329	202.555	435
chr11	124669553	124670886	Peak_1622	2062	.	11.0358	206.239	202.465	849
chr11	10562121	10563083	Peak_1623	2059	.	10.8037	205.977	202.204	482
chr5	6632539	6634087	Peak_1624	2059	.	10.8037	205.977	202.204	475
chr7	96338539	96339422	Peak_1625	2059	.	11.5537	205.923	202.151	379
chr5	96270077	96272240	Peak_1626	2058	.	11.869	205.855	202.083	746
chr9	114423594	114425020	Peak_1627	2058	.	13.1546	205.821	202.049	481
chr14	51297103	51298272	Peak_1628	2055	.	15.2863	205.58	201.809	640
chr2	21022046	21023014	Peak_1629	2055	.	11.2624	205.51	201.738	520
chr8	37756265	37757218	Peak_1630	2052	.	12.4848	205.299	201.529	505
chr3	160472149	160473165	Peak_1631	2052	.	12.8161	205.216	201.446	576
chr7	117823932	117824723	Peak_1632	2052	.	14.5028	205.206	201.436	396
chr10	127407415	127408775	Peak_1633	2051	.	7.64484	205.188	201.417	978
chr10	64563818	64565816	Peak_1634	2051	.	12.2003	205.173	201.403	976
chr13	28194162	28196815	Peak_1635	2050	.	14.3173	205.07	201.3	2028
chr20	61846655	61848452	Peak_1636	2050	.	13.4115	205.056	201.286	632
chr7	156802837	156804679	Peak_1637	2050	.	13.0921	205.004	201.234	954
chr3	141205461	141206893	Peak_1638	2049	.	14.0307	204.992	201.223	934
chr6	107435159	107437379	Peak_1639	2049	.	15.6625	204.974	201.205	398
chr9	125675096	125676192	Peak_1640	2049	.	10.7613	204.929	201.16	337
chr16	67693218	67694768	Peak_1641	2046	.	10.1446	204.681	200.912	734
chr1	109618372	109619247	Peak_1642	2046	.	10.3248	204.633	200.865	336
chr2	3522246	3523631	Peak_1643	2046	.	10.3248	204.633	200.865	934
chr20	5986247	5987486	Peak_1644	2044	.	11.4969	204.488	200.72	770
chr9	140483779	140485996	Peak_1645	2042	.	13.2418	204.206	200.439	935
chr20	3183768	3185481	Peak_1646	2041	.	13.0016	204.193	200.426	1367
chr11	43665538	43666375	Peak_1647	2041	.	10.9919	204.123	200.357	409
chr19	40030034	40030929	Peak_1648	2041	.	10.97	204.123	200.357	552
chr17	61818499	61819633	Peak_1649	2040	.	8.2739	204.059	200.293	444
chr22	19158670	19160126	Peak_1650	2040	.	10.2373	204.051	200.285	784
chr7	99214154	99215053	Peak_1651	2040	.	10.2373	204.051	200.285	549
chr2	10587597	10588600	Peak_1652	2039	.	14.3784	203.976	200.211	560
chr2	114513572	114514785	Peak_1653	2039	.	12.6501	203.933	200.167	440
chr8	100024696	100026030	Peak_1654	2039	.	8.86243	203.931	200.165	437
chr16	89640594	89641943	Peak_1655	2037	.	8.67838	203.795	200.03	515
chr7	33101637	33102953	Peak_1656	2037	.	11.4828	203.766	200.001	547
chr7	72395411	72396346	Peak_1657	2036	.	9.73928	203.629	199.865	357
chr14	50863185	50864509	Peak_1658	2036	.	10.305	203.605	199.841	428
chr12	123464845	123466012	Peak_1659	2034	.	10.9857	203.499	199.735	599
chr15	91207760	91209254	Peak_1660	2033	.	11.6812	203.324	199.561	683
chr12	109249681	109252004	Peak_1661	2032	.	14.0914	203.278	199.515	1493
chr15	102264042	102264772	Peak_1662	2031	.	11.7454	203.161	199.398	410
chr18	56530754	56531683	Peak_1663	2030	.	16.9339	203.091	199.328	306
chr9	88713617	88715117	Peak_1664	2029	.	12.1226	202.965	199.203	655
chr11	130029179	130030465	Peak_1665	2028	.	13.1934	202.899	199.137	700
chr1	41444738	41446671	Peak_1666	2028	.	15.4567	202.852	199.09	1244
chr11	46258624	46260256	Peak_1667	2027	.	13.3964	202.781	199.019	1157
chr9	134000665	134001579	Peak_1668	2027	.	9.5664	202.744	198.982	392
chr10	70748316	70749303	Peak_1669	2026	.	10.4846	202.675	198.914	463
chr12	104349990	104351566	Peak_1670	2025	.	9.88537	202.559	198.798	754
chr2	20251030	20252027	Peak_1671	2025	.	9.88537	202.559	198.798	640
chr6	4018308	4019294	Peak_1672	2025	.	10.079	202.541	198.781	480
chr7	5465354	5470191	Peak_1673	2023	.	11.1713	202.31	198.55	910
chr9	127177139	127177871	Peak_1674	2023	.	11.1486	202.31	198.55	428
chr20	45317387	45318180	Peak_1675	2021	.	12.3123	202.189	198.43	411
chr19	15489364	15491578	Peak_1676	2020	.	13.071	202.081	198.322	1115
chr2	69663845	69665199	Peak_1677	2020	.	11.6962	202.074	198.315	492
chr9	139376842	139377616	Peak_1678	2020	.	12.0857	202.012	198.254	417
chr1	28844414	28845769	Peak_1679	2019	.	10.734	201.928	198.17	508
chr1	204484911	204486167	Peak_1680	2019	.	9.38606	201.919	198.161	767
chr5	134240101	134241501	Peak_1681	2017	.	10.6553	201.792	198.034	496
chr5	168005985	168006998	Peak_1682	2017	.	10.6765	201.792	198.034	322
chr8	146017168	146018655	Peak_1683	2016	.	9.70312	201.627	197.87	507
chr18	44676026	44677527	Peak_1684	2016	.	11.4118	201.615	197.858	715
chr5	36240789	36242711	Peak_1685	2015	.	13.0165	201.599	197.842	1116
chr6	99796803	99798113	Peak_1686	2015	.	13.0165	201.599	197.842	858
chr2	219262544	219264653	Peak_1687	2015	.	10.353	201.589	197.832	1110
chr8	102217049	102218809	Peak_1688	2014	.	11.1423	201.429	197.673	542
chr10	103113637	103114701	Peak_1689	2014	.	9.07001	201.405	197.649	369
chr14	68140832	68142701	Peak_1690	2009	.	11.647	200.989	197.234	455
chr20	30794981	30796171	Peak_1691	2009	.	11.647	200.989	197.234	458
chr8	42248647	42250051	Peak_1692	2008	.	12.3501	200.845	197.09	843
chr2	74709086	74710186	Peak_1693	2006	.	9.64887	200.628	196.875	688
chr16	48643081	48644730	Peak_1694	2005	.	14.7271	200.555	196.801	733
chr15	91497977	91498944	Peak_1695	2005	.	11.3645	200.541	196.788	419
chr4	185393689	185395137	Peak_1696	2005	.	17.4835	200.51	196.757	868
chr13	21714191	21715364	Peak_1697	2004	.	11.953	200.438	196.686	658
chr7	6616896	6618373	Peak_1698	2003	.	13.8366	200.323	196.571	304
chr7	102789326	102790404	Peak_1699	2001	.	12.9502	200.136	196.385	656
chr1	156710228	156711494	Peak_1700	2001	.	8.75484	200.106	196.355	542
chr3	134204217	134205721	Peak_1701	1999	.	15.3786	199.993	196.242	1070
chr17	5094396	5095770	Peak_1702	1996	.	9.63079	199.631	195.881	586
chr10	81106926	81108297	Peak_1703	1996	.	11.2266	199.613	195.864	589
chr14	35872892	35874556	Peak_1704	1994	.	11.3173	199.469	195.72	921
chr20	55926134	55926955	Peak_1705	1994	.	11.3409	199.469	195.72	298
chr10	101379507	101381591	Peak_1706	1994	.	9.24914	199.45	195.701	1660
chr2	84685788	84687007	Peak_1707	1993	.	12.166	199.334	195.586	500
chr1	19281982	19283299	Peak_1708	1993	.	12.9287	199.33	195.582	905
chr17	43661589	43663973	Peak_1709	1992	.	9.149	199.202	195.454	763
chr19	40696601	40698127	Peak_1710	1991	.	13.7719	199.16	195.412	555
chr3	37284092	37285402	Peak_1711	1991	.	11.2847	199.119	195.372	431
chr16	67879739	67881956	Peak_1712	1990	.	12.7584	199.032	195.285	1547
chr10	126106506	126107977	Peak_1713	1989	.	9.74644	198.927	195.18	754
chr16	4663797	4666324	Peak_1714	1987	.	12.3431	198.73	194.984	968
chr5	114961111	114961931	Peak_1715	1986	.	9.59463	198.635	194.889	401
chr10	77035132	77036756	Peak_1716	1986	.	12.2424	198.627	194.881	1201
chr14	104181120	104183109	Peak_1717	1985	.	11.967	198.568	194.822	402
chr1	1839427	1841435	Peak_1718	1985	.	12.3857	198.534	194.789	959
chr21	37757516	37758361	Peak_1719	1980	.	14.4821	198.067	194.323	382
chr17	47112783	47113631	Peak_1720	1980	.	8.45504	198.045	194.302	547
chr13	101240548	101241472	Peak_1721	1978	.	10.7724	197.809	194.066	339
chr2	96191951	96193400	Peak_1722	1976	.	13.0832	197.697	193.954	781
chr1	32686856	32688600	Peak_1723	1974	.	11.6614	197.499	193.758	1265
chr6	31627866	31628765	Peak_1724	1974	.	11.0811	197.466	193.725	588
chr14	50052544	50053235	Peak_1725	1973	.	11.2463	197.33	193.589	336
chr3	125093180	125094841	Peak_1726	1971	.	11.548	197.163	193.423	760
chr1	228353005	228354345	Peak_1727	1971	.	11.7993	197.158	193.418	564
chr1	247094165	247095450	Peak_1728	1970	.	13.1526	197.053	193.313	823
chr15	60770202	60771540	Peak_1729	1969	.	14.1271	196.938	193.198	851
chr15	43477253	43478311	Peak_1730	1968	.	13.646	196.868	193.129	439
chr9	35102041	35103334	Peak_1731	1967	.	10.7285	196.762	193.023	602
chr2	242575507	242577637	Peak_1732	1966	.	15.5099	196.679	192.941	837
chr2	220407536	220408996	Peak_1733	1966	.	11.4994	196.662	192.924	532
chr3	150263432	150264492	Peak_1734	1966	.	10.8367	196.652	192.914	623
chr17	16556429	16557319	Peak_1735	1965	.	10.5069	196.591	192.853	422
chr16	83932228	83933763	Peak_1736	1965	.	13.0231	196.559	192.821	746
chr4	186124200	186125710	Peak_1737	1964	.	9.8869	196.461	192.724	717
chr8	98787613	98789015	Peak_1738	1964	.	9.90611	196.461	192.724	869
chr10	88854948	88856347	Peak_1739	1962	.	11.199	196.262	192.525	294
chr5	130599230	130600592	Peak_1740	1961	.	15.1971	196.161	192.424	664
chr4	77068890	77070146	Peak_1741	1960	.	9.21529	196.036	192.3	515
chr7	95950660	95951892	Peak_1742	1959	.	12.7823	195.939	192.203	424
chr8	99076462	99077520	Peak_1743	1958	.	10.2695	195.837	192.101	611
chr13	22032579	22033613	Peak_1744	1957	.	14.093	195.763	192.028	563
chr17	33307180	33308462	Peak_1745	1957	.	13.1755	195.745	192.01	955
chr8	109260402	109261429	Peak_1746	1957	.	10.6845	195.716	191.981	369
chr20	31988780	31989597	Peak_1747	1957	.	12.2117	195.707	191.972	363
chr3	197476495	197477693	Peak_1748	1956	.	11.6765	195.671	191.936	362
chr6	39082262	39083370	Peak_1749	1951	.	11.1754	195.196	191.463	495
chr9	95570854	95572396	Peak_1750	1951	.	11.1754	195.196	191.463	610
chr21	40554648	40555923	Peak_1751	1951	.	13.7298	195.108	191.376	487
chr6	17600086	17601627	Peak_1752	1951	.	13.6969	195.108	191.376	727
chr7	42950962	42952158	Peak_1753	1951	.	14.0074	195.102	191.369	376
chr1	32816252	32817959	Peak_1754	1949	.	11.7176	194.931	191.199	446
chr9	128023708	128024874	Peak_1755	1948	.	9.32049	194.841	191.109	613
chr1	6484698	6485556	Peak_1756	1948	.	10.6767	194.833	191.101	385
chr16	30568849	30570370	Peak_1757	1948	.	10.2489	194.81	191.079	598
chr13	79979277	79980973	Peak_1758	1945	.	9.66182	194.53	190.8	1314
chr14	104094185	104096492	Peak_1759	1945	.	10.4221	194.521	190.79	585
chr22	22221021	22222805	Peak_1760	1945	.	11.4257	194.508	190.778	617
chr16	732581	736174	Peak_1761	1944	.	10.2181	194.436	190.707	1470
chr8	17779789	17781792	Peak_1762	1944	.	10.0274	194.413	190.683	315
chr10	127511027	127511973	Peak_1763	1944	.	8.60114	194.405	190.676	530
chr7	44121403	44122234	Peak_1764	1942	.	12.933	194.29	190.56	440
chr9	101557789	101559502	Peak_1765	1942	.	12.903	194.29	190.56	721
chr11	108368134	108369574	Peak_1766	1942	.	11.5365	194.253	190.524	761
chr9	139257361	139258880	Peak_1767	1940	.	11.6318	194.072	190.343	683
chr10	118501169	118502934	Peak_1768	1940	.	9.73937	194.035	190.306	1143
chr11	3012746	3014439	Peak_1769	1938	.	10.8753	193.841	190.113	496
chr14	23503417	23504564	Peak_1770	1938	.	10.8753	193.841	190.113	473
chr17	72426524	72428765	Peak_1771	1937	.	9.55022	193.789	190.062	720
chr15	90436681	90437824	Peak_1772	1936	.	13.0307	193.636	189.909	320
chr7	7606278	7607218	Peak_1773	1936	.	14.488	193.634	189.907	463
chr11	63952444	63953290	Peak_1774	1934	.	12.1299	193.496	189.769	491
chr20	37075015	37075931	Peak_1775	1934	.	10.4009	193.488	189.761	383
chr7	158649039	158649966	Peak_1776	1934	.	9.79084	193.44	189.714	462
chr3	193858394	193860772	Peak_1777	1934	.	13.9564	193.419	189.693	1260
chr20	4666781	4668267	Peak_1778	1933	.	13.7495	193.351	189.626	615
chr19	488318	490109	Peak_1779	1933	.	12.7924	193.329	189.603	489
chr3	160822288	160823428	Peak_1780	1931	.	12.3439	193.193	189.468	557
chr17	7486023	7487972	Peak_1781	1931	.	10.3293	193.169	189.444	608
chr1	8013753	8014782	Peak_1782	1927	.	10.8298	192.789	189.065	379
chr5	139486555	139487460	Peak_1783	1927	.	11.6407	192.759	189.035	510
chr2	170680719	170681711	Peak_1784	1926	.	12.7197	192.693	188.97	561
chr8	146023929	146024983	Peak_1785	1925	.	9.60593	192.537	188.814	563
chr3	98241047	98241996	Peak_1786	1925	.	9.76004	192.534	188.811	491
chr1	22778285	22779295	Peak_1787	1925	.	12.9698	192.5	188.778	402
chr3	128368833	128370593	Peak_1788	1924	.	10.3585	192.456	188.734	588
chr12	122906000	122907726	Peak_1789	1923	.	13.0218	192.326	188.604	812
chr1	224621552	224623216	Peak_1790	1922	.	15.641	192.215	188.494	321
chr12	42631161	42632782	Peak_1791	1921	.	14.0323	192.185	188.464	319
chr1	65210164	65211604	Peak_1792	1920	.	15.1304	192.056	188.335	685
chr1	53386685	53387702	Peak_1793	1920	.	11.7078	192.017	188.296	566
chr2	74210769	74213099	Peak_1794	1918	.	13.2983	191.884	188.164	983
chr5	170814699	170815830	Peak_1795	1918	.	13.0695	191.85	188.13	427
chr14	58711338	58712180	Peak_1796	1917	.	11.62	191.723	188.003	341
chr15	65809370	65810643	Peak_1797	1915	.	9.56867	191.542	187.823	502
chr1	1821224	1823646	Peak_1798	1914	.	12.6066	191.44	187.721	504
chr5	134181393	134182301	Peak_1799	1914	.	9.73321	191.433	187.714	413
chr2	88354694	88355706	Peak_1800	1913	.	10.9253	191.391	187.673	379
chr11	107728646	107729853	Peak_1801	1910	.	13.3836	191.065	187.348	767
chr18	12656833	12658884	Peak_1802	1910	.	13.416	191.065	187.348	425
chr19	4791633	4793087	Peak_1803	1905	.	10.047	190.532	186.817	428
chr6	3518310	3519157	Peak_1804	1905	.	7.75178	190.513	186.797	412
chr10	70480833	70481694	Peak_1805	1904	.	13.8037	190.432	186.717	408
chr2	232328294	232330547	Peak_1806	1904	.	9.71399	190.431	186.716	730
chr1	16678267	16679503	Peak_1807	1902	.	8.63253	190.233	186.519	534
chr16	10479629	10480507	Peak_1808	1900	.	14.3072	190.079	186.365	494
chr1	9188121	9189276	Peak_1809	1900	.	14.3072	190.079	186.365	789
chr1	52830843	52832082	Peak_1810	1900	.	10.8045	190.073	186.359	941
chr20	61273129	61274888	Peak_1811	1899	.	11.3031	189.913	186.2	1007
chr6	86387816	86389303	Peak_1812	1898	.	10.9626	189.888	186.175	1128
chr5	177026543	177027638	Peak_1813	1898	.	12.1758	189.867	186.154	688
chr1	201368183	201369290	Peak_1814	1897	.	13.07	189.74	186.027	522
chr5	1633614	1634813	Peak_1815	1895	.	12.1454	189.586	185.875	511
chr4	139936306	139937631	Peak_1816	1895	.	12.3683	189.576	185.864	894
chr20	23617801	23618821	Peak_1817	1895	.	13.6585	189.568	185.856	638
chr4	16227382	16229110	Peak_1818	1894	.	16.3293	189.49	185.779	540
chr1	151371860	151372810	Peak_1819	1894	.	10.465	189.471	185.76	365
chr17	684977	686160	Peak_1820	1894	.	9.67557	189.431	185.72	367
chr22	45097680	45098965	Peak_1821	1894	.	11.5868	189.42	185.709	730
chr13	21140702	21141873	Peak_1822	1893	.	10.2525	189.37	185.659	762
chr14	90722767	90723580	Peak_1823	1893	.	9.8687	189.355	185.644	287
chr9	103114431	103115506	Peak_1824	1893	.	11.1687	189.338	185.628	502
chr1	1341980	1343653	Peak_1825	1893	.	10.0542	189.333	185.623	1012
chr1	220267380	220268193	Peak_1826	1893	.	10.0542	189.333	185.623	372
chr3	28389745	28390986	Peak_1827	1891	.	11.6715	189.104	185.394	682
chrX	153283495	153287008	Peak_1828	1890	.	16.7834	189.091	185.382	2111
chr5	81267425	81268613	Peak_1829	1889	.	11.8044	188.978	185.269	568
chr1	227922231	227923442	Peak_1830	1889	.	9.16241	188.97	185.261	556
chr1	101490685	101491867	Peak_1831	1889	.	12.8681	188.922	185.213	639
chr1	45769458	45771047	Peak_1832	1886	.	13.8252	188.679	184.971	270
chr19	50353771	50354939	Peak_1833	1885	.	10.6932	188.595	184.888	413
chr7	149535318	149536299	Peak_1834	1884	.	10.9075	188.494	184.787	397
chr2	61991401	61992215	Peak_1835	1884	.	12.1174	188.482	184.775	338
chr19	45578942	45580392	Peak_1836	1884	.	11.4919	188.48	184.773	554
chr2	27664949	27666275	Peak_1837	1884	.	11.4663	188.48	184.773	536
chr1	46859706	46860603	Peak_1838	1884	.	12.3395	188.463	184.756	387
chr3	126422276	126423767	Peak_1839	1884	.	11.4615	188.433	184.726	893
chr9	34637058	34638530	Peak_1840	1883	.	8.56947	188.341	184.635	579
chr3	52443439	52444202	Peak_1841	1880	.	11.1798	188.083	184.377	453
chrX	119005495	119006454	Peak_1842	1880	.	14.7787	188.028	184.322	436
chr17	47865887	47866600	Peak_1843	1879	.	9.12728	187.996	184.291	364
chr20	44441038	44442139	Peak_1844	1879	.	9.00666	187.979	184.274	395
chr12	57823793	57825121	Peak_1845	1879	.	13.9293	187.921	184.216	659
chr1	208041807	208042888	Peak_1846	1877	.	12.8066	187.791	184.086	576
chr9	128002899	128004617	Peak_1847	1877	.	9.28724	187.765	184.061	565
chr6	122720242	122721547	Peak_1848	1877	.	14.7373	187.74	184.036	871
chr17	73266208	73267993	Peak_1849	1876	.	9.25826	187.617	183.913	1350
chr2	152145286	152146475	Peak_1850	1875	.	10.6476	187.551	183.847	802
chr4	4249491	4250791	Peak_1851	1875	.	11.1775	187.501	183.798	363
chr22	50967695	50970923	Peak_1852	1874	.	9.59872	187.435	183.732	1423
chr2	230785810	230788011	Peak_1853	1874	.	11.4407	187.402	183.699	1633
chr9	140171436	140173251	Peak_1854	1874	.	10.4211	187.401	183.698	854
chr9	132585299	132586635	Peak_1855	1873	.	12.0895	187.379	183.676	1038
chr1	36689732	36690875	Peak_1856	1873	.	12.3107	187.351	183.649	552
chr12	3185487	3187083	Peak_1857	1873	.	9.99273	187.302	183.6	674
chr1	156561185	156562348	Peak_1858	1870	.	11.1306	187.017	183.315	542
chr3	121553068	121554129	Peak_1859	1870	.	11.1552	187.017	183.315	660
chr4	141294629	141295461	Peak_1860	1870	.	11.1552	187.017	183.315	372
chr11	118272154	118272920	Peak_1861	1869	.	11.5928	186.934	183.233	370
chr21	35747297	35748682	Peak_1862	1867	.	11.6975	186.798	183.097	681
chr17	80169955	80171692	Peak_1863	1867	.	10.0784	186.78	183.079	1093
chr14	105219314	105220274	Peak_1864	1866	.	9.63746	186.68	182.98	331
chr8	101734472	101735292	Peak_1865	1866	.	8.80007	186.657	182.957	413
chr15	57210339	57212236	Peak_1866	1866	.	12.3664	186.654	182.954	1247
chr7	56118507	56120030	Peak_1867	1866	.	14.1355	186.606	182.906	496
chr18	48722448	48724050	Peak_1868	1865	.	16.6434	186.575	182.875	1079
chr6	13574030	13575679	Peak_1869	1864	.	13.649	186.429	182.73	1280
chr19	1604306	1606175	Peak_1870	1863	.	11.3894	186.326	182.627	867
chr16	4475640	4476681	Peak_1871	1862	.	10.1677	186.297	182.599	478
chr7	27189811	27191428	Peak_1872	1862	.	10.1465	186.297	182.599	393
chr17	1464564	1466463	Peak_1873	1861	.	12.7912	186.18	182.482	1327
chr7	76178493	76179501	Peak_1874	1861	.	10.7388	186.13	182.432	334
chr16	18936700	18937838	Peak_1875	1860	.	13.0549	186.004	182.306	467
chr2	39346992	39348657	Peak_1876	1859	.	14.1732	185.968	182.27	914
chr6	151186574	151188255	Peak_1877	1859	.	12.4533	185.963	182.265	613
chr17	26878848	26879826	Peak_1878	1858	.	12.3724	185.853	182.155	640
chr19	56185783	56187263	Peak_1879	1858	.	12.3724	185.853	182.155	1049
chr10	43133067	43133854	Peak_1880	1858	.	11.5665	185.851	182.154	428
chr6	170123336	170125569	Peak_1881	1858	.	16.5194	185.849	182.152	465
chr11	61099753	61101254	Peak_1882	1858	.	9.23299	185.807	182.11	617
chr3	50711830	50713230	Peak_1883	1857	.	16.1066	185.761	182.064	866
chr3	32147336	32148584	Peak_1884	1856	.	10.8207	185.669	181.973	490
chr3	52311535	52313545	Peak_1885	1856	.	10.8444	185.669	181.973	796
chr3	88107428	88108752	Peak_1886	1856	.	10.8207	185.669	181.973	521
chr7	141250499	141251726	Peak_1887	1856	.	10.8444	185.669	181.973	888
chr15	34517006	34517649	Peak_1888	1855	.	12.7144	185.533	181.837	315
chr10	102755966	102760492	Peak_1889	1855	.	8.90133	185.524	181.829	1518
chr1	11723966	11725118	Peak_1890	1855	.	11.4485	185.523	181.827	341
chr4	41992379	41993214	Peak_1891	1854	.	10.5793	185.466	181.771	378
chr7	75156532	75157685	Peak_1892	1854	.	10.5566	185.466	181.771	733
chr19	1020066	1021354	Peak_1893	1854	.	11.7308	185.451	181.755	859
chr2	32581613	32583026	Peak_1894	1853	.	10.3552	185.337	181.642	914
chr6	42420026	42420824	Peak_1895	1853	.	10.3332	185.337	181.642	315
chr4	1339921	1341879	Peak_1896	1853	.	9.72988	185.334	181.639	1411
chr5	53813315	53814403	Peak_1897	1853	.	16.5501	185.32	181.625	394
chr21	30374875	30375511	Peak_1898	1852	.	10.1253	185.276	181.582	341
chr3	139107916	139109423	Peak_1899	1852	.	10.1253	185.276	181.582	389
chr11	695614	696586	Peak_1900	1852	.	11.3638	185.252	181.557	455
chr19	3606710	3607810	Peak_1901	1850	.	11.0222	185.087	181.393	401
chr1	176175503	176176569	Peak_1902	1850	.	12.7602	185.051	181.358	345
chrX	56589807	56590888	Peak_1903	1849	.	15.2312	184.904	181.21	400
chr9	86237586	86238820	Peak_1904	1848	.	9.19683	184.83	181.137	796
chr17	75276900	75278369	Peak_1905	1847	.	9.72677	184.789	181.096	877
chr20	57580739	57582799	Peak_1906	1847	.	12.0862	184.738	181.046	1261
chr3	197517901	197518972	Peak_1907	1846	.	14.396	184.69	180.998	512
chr6	147524558	147525877	Peak_1908	1846	.	11.6173	184.625	180.932	486
chr13	100619952	100624031	Peak_1909	1846	.	10.7734	184.618	180.926	884
chr1	91487246	91488348	Peak_1910	1845	.	12.6346	184.597	180.905	713
chr11	3818081	3819721	Peak_1911	1844	.	9.50266	184.451	180.76	575
chr15	65578363	65579461	Peak_1912	1844	.	11.3967	184.446	180.755	547
chr11	125756971	125758550	Peak_1913	1843	.	10.2893	184.308	180.617	896
chr1	68962033	68963025	Peak_1914	1843	.	10.3113	184.308	180.617	484
chr2	70527993	70529297	Peak_1915	1842	.	9.89026	184.266	180.576	857
chr16	30670031	30671824	Peak_1916	1842	.	10.0829	184.256	180.566	743
chr7	156930842	156932569	Peak_1917	1841	.	13.06	184.192	180.502	372
chr7	104652182	104653393	Peak_1918	1841	.	14.0541	184.189	180.498	747
chr4	2936492	2937505	Peak_1919	1841	.	11.5693	184.164	180.474	395
chr17	66508490	66509598	Peak_1920	1841	.	9.02189	184.114	180.424	473
chr13	108869913	108871347	Peak_1921	1840	.	13.3152	184.099	180.409	671
chr19	45542148	45542848	Peak_1922	1840	.	13.743	184.074	180.384	279
chr12	6975886	6977715	Peak_1923	1839	.	10.0538	183.913	180.223	1078
chr15	65066960	65067695	Peak_1924	1838	.	13.1331	183.9	180.211	304
chr15	78441534	78442617	Peak_1925	1838	.	11.0076	183.83	180.141	441
chr1	59368866	59370171	Peak_1926	1838	.	11.0076	183.83	180.141	846
chr2	120973324	120974277	Peak_1927	1837	.	10.8946	183.756	180.067	526
chr6	127587768	127588932	Peak_1928	1836	.	9.32648	183.635	179.946	403
chr3	15900285	15901439	Peak_1929	1836	.	12.2846	183.629	179.941	380
chr2	223520296	223521031	Peak_1930	1834	.	9.48345	183.46	179.772	423
chr19	572316	573640	Peak_1931	1834	.	9.80279	183.449	179.762	489
chr4	178230860	178231491	Peak_1932	1832	.	10.2674	183.279	179.593	303
chr1	27247749	27249019	Peak_1933	1832	.	9.84928	183.257	179.57	608
chr5	134209354	134210990	Peak_1934	1832	.	10.7189	183.238	179.552	949
chr9	124921317	124922191	Peak_1935	1832	.	10.7189	183.238	179.552	544
chr16	837534	839399	Peak_1936	1831	.	10.7807	183.101	179.415	582
chr6	108278517	108279475	Peak_1937	1829	.	11.8939	182.984	179.299	519
chr16	85643825	85645587	Peak_1938	1828	.	9.0869	182.848	179.163	1379
chr5	14871232	14873076	Peak_1939	1828	.	16.4101	182.816	179.131	1038
chr15	44037772	44039432	Peak_1940	1827	.	10.983	182.771	179.086	1074
chr1	226249245	226250942	Peak_1941	1826	.	9.28922	182.652	178.968	378
chr11	235750	236374	Peak_1942	1826	.	13.1259	182.603	178.919	333
chr6	116989405	116990215	Peak_1943	1825	.	10.7261	182.521	178.837	335
chr17	80008606	80010650	Peak_1944	1824	.	8.26666	182.473	178.789	1348
chr14	50319001	50319772	Peak_1945	1823	.	10.4655	182.351	178.668	371
chr7	150705680	150706986	Peak_1946	1823	.	9.63072	182.334	178.651	416
chr5	150459947	150461172	Peak_1947	1822	.	10.2454	182.253	178.57	499
chr1	40348708	40349330	Peak_1948	1822	.	9.82879	182.249	178.567	328
chr17	25675870	25677240	Peak_1949	1822	.	12.1912	182.213	178.531	528
chr14	103523012	103524829	Peak_1950	1821	.	13.2575	182.136	178.454	560
chr12	123237160	123237942	Peak_1951	1820	.	11.2101	182.037	178.356	347
chr8	21946216	21947650	Peak_1952	1819	.	13.2362	181.97	178.288	646
chr3	49466300	49466971	Peak_1953	1819	.	12.9664	181.943	178.262	347
chr18	13725798	13727416	Peak_1954	1819	.	12.9953	181.916	178.234	527
chr8	54934145	54935449	Peak_1955	1819	.	12.9953	181.916	178.234	625
chr3	42693942	42696903	Peak_1956	1815	.	10.7346	181.524	177.844	2326
chr8	145701922	145704383	Peak_1957	1814	.	8.95325	181.484	177.804	1663
chr5	54522118	54523590	Peak_1958	1814	.	10.6552	181.475	177.795	714
chr4	53524970	53526353	Peak_1959	1814	.	12.8318	181.464	177.784	871
chr7	65338113	65339233	Peak_1960	1814	.	16.1799	181.464	177.784	443
chr3	13008124	13009373	Peak_1961	1813	.	11.5104	181.377	177.698	868
chr16	1755702	1756779	Peak_1962	1813	.	9.61089	181.336	177.657	612
chr1	244816222	244817045	Peak_1963	1812	.	9.76731	181.243	177.565	384
chr4	2463883	2464873	Peak_1964	1812	.	9.97692	181.205	177.527	433
chr10	75544959	75546224	Peak_1965	1811	.	10.6481	181.147	177.469	553
chr22	19752904	19755419	Peak_1966	1810	.	10.6856	181.005	177.328	1022
chr20	19997482	19998742	Peak_1967	1809	.	11.1845	180.969	177.292	772
chr11	64781063	64782536	Peak_1968	1809	.	9.07026	180.935	177.257	917
chr8	145910137	145911979	Peak_1969	1808	.	10.9047	180.863	177.186	805
chr20	13765393	13766412	Peak_1970	1805	.	14.3541	180.594	176.918	618
chr6	31508942	31510838	Peak_1971	1804	.	10.6316	180.43	176.755	690
chr21	35445808	35446646	Peak_1972	1804	.	15.509	180.429	176.754	284
chr5	115420453	115421231	Peak_1973	1803	.	9.57122	180.341	176.666	347
chr1	45240876	45242610	Peak_1974	1802	.	9.66766	180.283	176.609	634
chr3	15140134	15140894	Peak_1975	1802	.	9.74682	180.239	176.564	429
chr14	77492333	77495293	Peak_1976	1801	.	9.93452	180.192	176.517	2538
chr13	114238584	114240014	Peak_1977	1801	.	12.6767	180.191	176.517	1058
chr1	184020355	184021388	Peak_1978	1799	.	8.6173	179.995	176.322	603
chr17	53828196	53829391	Peak_1979	1799	.	8.10646	179.924	176.251	371
chr2	201980325	201982235	Peak_1980	1799	.	11.1333	179.903	176.23	1039
chr7	138665438	138666993	Peak_1981	1799	.	11.1589	179.903	176.23	1094
chr1	23693997	23696460	Peak_1982	1797	.	11.395	179.705	176.032	1641
chr4	75023199	75024273	Peak_1983	1797	.	11.395	179.705	176.032	376
chr16	23521301	23522018	Peak_1984	1796	.	15.5302	179.608	175.936	323
chr19	45394333	45395240	Peak_1985	1795	.	11.0442	179.568	175.896	449
chr10	11783928	11785318	Peak_1986	1795	.	13.1482	179.515	175.843	731
chr7	151722397	151723585	Peak_1987	1795	.	13.1148	179.515	175.843	534
chr16	127060	128929	Peak_1988	1794	.	15.6165	179.455	175.784	462
chr8	95835377	95836203	Peak_1989	1794	.	8.20154	179.429	175.757	332
chr6	100015820	100016797	Peak_1990	1793	.	10.5843	179.387	175.716	507
chr15	40544265	40545894	Peak_1991	1793	.	9.53156	179.346	175.675	813
chr22	50682595	50684437	Peak_1992	1792	.	8.88137	179.293	175.622	892
chr22	20066892	20069154	Peak_1993	1792	.	11.4302	179.22	175.549	1126
chr15	28982606	28983491	Peak_1994	1790	.	16.2234	179.074	175.404	431
chr5	138727490	138729228	Peak_1995	1789	.	10.4472	178.982	175.312	1106
chr9	77567168	77568237	Peak_1996	1788	.	12.4378	178.802	175.133	366
chr14	60631414	60632451	Peak_1997	1787	.	9.17745	178.738	175.069	662
chr17	39845108	39845825	Peak_1998	1786	.	7.95737	178.618	174.949	336
chr3	196466582	196467706	Peak_1999	1786	.	11.7262	178.616	174.948	434
[truncated: 7,040 more rows]

## Sheet: Table S3C
Supplemental Table S3C. ZFX binding sites in C42B
chr2	206949540	206951210	Peak_1	45316	.	143.775	4531.7	4522.69	994
chr14	31675784	31677789	Peak_2	31515	.	80.999	3151.51	3144.44	921
chr10	103453450	103455575	Peak_3	27458	.	79.9316	2745.84	2738.96	645
chr3	150320863	150321950	Peak_4	27189	.	56.4652	2718.91	2712.06	497
chr12	53845655	53846766	Peak_5	26576	.	77.9338	2657.68	2650.88	680
chr10	180497	182569	Peak_6	22887	.	105.246	2288.73	2282.19	1328
chr22	21921798	21923167	Peak_7	19872	.	60.1372	1987.23	1980.84	457
chr22	41697429	41698826	Peak_8	19416	.	61.775	1941.65	1935.3	907
chr19	18942519	18943968	Peak_9	18063	.	51.6071	1806.34	1800.07	435
chr3	47204421	47206471	Peak_10	16675	.	60.5477	1667.57	1661.38	497
chr22	35653198	35654458	Peak_11	16127	.	53.1496	1612.74	1606.59	472
chr7	148395387	148397127	Peak_12	15793	.	48.4932	1579.35	1573.22	847
chr1	156737076	156738362	Peak_13	15556	.	40.4845	1555.61	1549.51	417
chr5	137688126	137689505	Peak_14	14036	.	57.3308	1403.66	1397.67	528
chr17	60555357	60557474	Peak_15	13743	.	61.7448	1374.34	1368.38	1173
chr12	112545683	112546806	Peak_16	13522	.	42.5028	1352.24	1346.3	690
chr16	1358809	1360360	Peak_17	13249	.	44.4338	1324.92	1319	428
chr20	62338363	62340083	Peak_18	13124	.	47.8474	1312.46	1306.54	820
chr7	129251057	129252676	Peak_19	13033	.	46.7763	1303.34	1297.43	770
chr17	48784424	48785564	Peak_20	12875	.	42.2352	1287.55	1281.66	765
chrX	24167028	24168713	Peak_21	12834	.	88.2086	1283.46	1277.56	1000
chr11	63606412	63607252	Peak_22	12666	.	45.9408	1266.61	1260.74	397
chr7	128170624	128172617	Peak_23	12626	.	35.6046	1262.61	1256.74	1027
chr11	64883949	64885335	Peak_24	11397	.	37.2409	1139.74	1133.98	962
chr2	162164630	162165628	Peak_25	11167	.	41.6855	1116.76	1111.02	530
chr5	141487966	141489388	Peak_26	10925	.	41.5452	1092.54	1086.82	694
chr17	38136849	38137849	Peak_27	10704	.	27.8388	1070.43	1064.73	320
chr17	45265712	45266853	Peak_28	9727	.	28.1964	972.772	967.14	697
chr9	21334660	21335651	Peak_29	9692	.	41.1008	969.278	963.648	546
chr6	33755672	33757117	Peak_30	9021	.	33.4853	902.109	896.522	970
chr10	116581123	116582675	Peak_31	8700	.	34.702	870.095	864.534	770
chr10	17243163	17244057	Peak_32	8700	.	29.2316	870.091	864.53	525
chr12	56651415	56652580	Peak_33	8678	.	30.7438	867.874	862.316	552
chr7	72935472	72936841	Peak_34	8636	.	26.5964	863.613	858.059	706
chr1	3712141	3713411	Peak_35	8594	.	37.2471	859.466	853.917	674
chr5	36875879	36877916	Peak_36	8484	.	27.3466	848.475	842.94	1652
chr3	138327134	138328375	Peak_37	8286	.	29.7028	828.607	823.093	578
chr10	28820907	28823456	Peak_38	8221	.	37.1509	822.157	816.65	2112
chr14	69618170	69619310	Peak_39	8080	.	27.0683	808.076	802.581	455
chr11	576234	577706	Peak_40	7858	.	34.2953	785.86	780.386	330
chr8	59571132	59572822	Peak_41	7808	.	29.2933	780.844	775.375	1030
chr6	76311106	76312816	Peak_42	7683	.	35.3505	768.332	762.877	952
chr17	11923909	11925228	Peak_43	7575	.	58.6355	757.582	752.14	571
chr11	14541139	14542149	Peak_44	7536	.	27.7801	753.661	748.224	603
chr10	22629176	22630371	Peak_45	7531	.	31.925	753.127	747.69	549
chr1	46766482	46769160	Peak_46	7439	.	27.9392	743.953	738.527	1953
chr12	74931366	74932609	Peak_47	7398	.	36.2956	739.837	734.416	432
chr5	133511823	133512944	Peak_48	7375	.	25.9838	737.542	732.124	621
chr11	64684204	64685028	Peak_49	7216	.	26.2371	721.642	716.244	460
chr5	176560210	176562337	Peak_50	7139	.	32.5338	713.939	708.551	1051
chr15	63796059	63798091	Peak_51	7101	.	26.6387	710.108	704.726	1032
chr8	38238968	38240882	Peak_52	7099	.	35.9836	709.93	704.548	554
chr19	57791139	57792720	Peak_53	7023	.	30.6156	702.342	696.97	890
chr19	33182375	33183970	Peak_54	7015	.	27.1299	701.561	696.19	909
chr15	34501497	34502499	Peak_55	6918	.	32.1074	691.837	686.48	521
chr7	148844244	148845773	Peak_56	6878	.	23.1997	687.851	682.499	513
chr7	148892468	148894064	Peak_57	6878	.	23.5118	687.845	682.493	442
chr7	138719619	138721408	Peak_58	6850	.	26.7315	685.064	679.717	1024
chr19	16737948	16739109	Peak_59	6775	.	28.074	677.527	672.193	549
chr2	85197052	85199649	Peak_60	6750	.	44.5153	675.021	669.692	2136
chr3	179040284	179041918	Peak_61	6711	.	22.651	671.147	665.826	1250
chr5	78908202	78908977	Peak_62	6708	.	28.741	670.842	665.521	281
chr15	66585410	66586972	Peak_63	6651	.	30.906	665.182	659.872	574
chr11	65292459	65293231	Peak_64	6642	.	30.0644	664.208	658.899	324
chr15	65425029	65426358	Peak_65	6568	.	28.9434	656.88	651.582	514
chr11	130785687	130786572	Peak_66	6561	.	31.8589	656.185	650.888	515
chr3	25705205	25706560	Peak_67	6454	.	33.2628	645.4	640.12	761
chr16	66864252	66865236	Peak_68	6415	.	26.3184	641.555	636.281	381
chr22	46067599	46068814	Peak_69	6314	.	24.4982	631.479	626.219	574
chr13	27825459	27826432	Peak_70	6277	.	16.9815	627.718	622.464	419
chr13	111805275	111806709	Peak_71	6227	.	24.9283	622.732	617.486	526
chr5	77071207	77072379	Peak_72	6207	.	22.4637	620.763	615.52	631
chr1	11072532	11073420	Peak_73	6203	.	24.3881	620.342	615.1	387
chr15	59225010	59226329	Peak_74	6078	.	20.7167	607.876	602.652	526
chr10	65280350	65281998	Peak_75	6061	.	34.5699	606.185	600.964	1024
chr1	154193291	154194324	Peak_76	5964	.	25.6185	596.434	591.227	501
chr7	149193701	149195348	Peak_77	5958	.	25.5781	595.819	590.614	958
chr7	6413844	6415094	Peak_78	5954	.	28.7811	595.43	590.225	570
chr19	4123613	4124378	Peak_79	5948	.	29.9863	594.845	589.641	356
chr17	60004576	60005562	Peak_80	5931	.	30.315	593.188	587.986	535
chr18	158053	159308	Peak_81	5919	.	29.1477	591.97	586.771	675
chr18	12376128	12377375	Peak_82	5882	.	23.4587	588.234	583.041	834
chr11	16759482	16761081	Peak_83	5815	.	23.1411	581.558	576.376	883
chr1	6684971	6686074	Peak_84	5807	.	25.7738	580.781	575.599	441
chr11	47787604	47789070	Peak_85	5669	.	27.5532	566.974	561.814	975
chr5	130499923	130501144	Peak_86	5604	.	27.0203	560.448	555.298	433
chr11	66246877	66247988	Peak_87	5545	.	21.4465	554.556	549.414	776
chr13	21347231	21348423	Peak_88	5539	.	19.4154	553.914	548.774	549
chr7	77045115	77046442	Peak_89	5519	.	20.7142	551.947	546.809	842
chr5	134733786	134735442	Peak_90	5488	.	25.7336	548.853	543.719	832
chr5	72793557	72795084	Peak_91	5474	.	25.7108	547.421	542.29	1057
chr5	180687638	180689099	Peak_92	5456	.	22.1258	545.653	540.525	1062
chr21	43299305	43300237	Peak_93	5451	.	35.863	545.122	539.995	436
chrX	21857520	21858560	Peak_94	5396	.	39.004	539.634	534.517	465
chr15	52860107	52861760	Peak_95	5356	.	23.2046	535.642	530.532	911
chr16	24550686	24552179	Peak_96	5315	.	23.6208	531.542	526.44	526
chr5	176432777	176433957	Peak_97	5289	.	22.2958	528.929	523.832	751
chr7	73588026	73589511	Peak_98	5269	.	19.7931	526.932	521.838	776
chr17	78518415	78519641	Peak_99	5260	.	28.06	526.078	520.987	420
chr18	72264110	72265137	Peak_100	5242	.	31.0975	524.29	519.202	504
chr14	54907375	54908332	Peak_101	5182	.	20.2916	518.257	513.182	473
chr16	66729580	66730598	Peak_102	5156	.	32.5452	515.613	510.542	568
chr3	142719847	142721245	Peak_103	5142	.	16.1883	514.211	509.143	808
chr13	28711946	28713652	Peak_104	5108	.	17.7411	510.837	505.773	1281
chr11	85375238	85376385	Peak_105	5107	.	21.153	510.735	505.672	716
chr10	44143619	44144775	Peak_106	5091	.	21.6737	509.181	504.121	505
chr18	67955608	67957371	Peak_107	5059	.	35.94	505.921	500.865	1154
chr7	100486502	100487528	Peak_108	5058	.	20.6987	505.807	500.752	591
chr1	9294754	9295586	Peak_109	5043	.	25.969	504.336	499.283	294
chr10	6130781	6131634	Peak_110	5034	.	21.2132	503.438	498.387	454
chr9	4740405	4741638	Peak_111	4967	.	26.929	496.794	491.755	653
chr1	29507530	29508490	Peak_112	4958	.	19.6934	495.871	490.834	506
chr9	130953193	130954352	Peak_113	4928	.	23.5856	492.801	487.77	651
chr1	55680351	55681604	Peak_114	4919	.	19.5908	491.944	486.914	531
chr17	38803448	38805191	Peak_115	4897	.	18.2353	489.738	484.713	440
chr16	58033751	58035104	Peak_116	4887	.	28.1362	488.714	483.691	640
chr1	29062855	29064565	Peak_117	4836	.	18.7709	483.692	478.679	974
chr20	57225871	57227553	Peak_118	4805	.	18.1329	480.588	475.581	622
chr12	2985452	2987150	Peak_119	4796	.	18.3805	479.638	474.634	580
chr22	17639364	17641059	Peak_120	4790	.	23.9686	479.088	474.085	1093
chr11	107879408	107880739	Peak_121	4775	.	22.6654	477.562	472.562	493
chr4	89443815	89445589	Peak_122	4728	.	19.5541	472.86	467.87	998
chr7	135194185	135194921	Peak_123	4719	.	17.7875	471.959	466.971	408
chr11	808731	810588	Peak_124	4693	.	16.3564	469.326	464.343	726
chr15	89877185	89878285	Peak_125	4688	.	16.6545	468.886	463.904	764
chr16	69345090	69346070	Peak_126	4684	.	26.3718	468.468	463.487	391
chr18	9102254	9103542	Peak_127	4683	.	21.623	468.343	463.362	659
chr11	46614872	46615850	Peak_128	4663	.	23.7417	466.305	461.328	526
chr3	47844183	47845438	Peak_129	4663	.	23.7178	466.305	461.328	656
chr11	47586733	47588016	Peak_130	4635	.	23.6221	463.512	458.541	472
chr19	38145490	38147203	Peak_131	4624	.	19.2528	462.428	457.459	649
chr16	70284648	70286012	Peak_132	4621	.	25.5558	462.134	457.165	976
chr14	75593128	75594388	Peak_133	4598	.	19.1819	459.829	454.865	425
chr1	206785287	206786054	Peak_134	4570	.	17.0522	457.059	452.101	413
chr7	148958547	148960168	Peak_135	4558	.	16.0555	455.882	450.927	1103
chr15	57024820	57026308	Peak_136	4520	.	22.4288	452.058	447.111	630
chr15	74907243	74909287	Peak_137	4465	.	17.925	446.591	441.656	980
chr3	122232819	122233955	Peak_138	4455	.	18.8256	445.506	440.572	779
chr3	182697576	182698720	Peak_139	4449	.	21.3915	444.937	440.005	525
chr5	135468230	135469365	Peak_140	4434	.	19.0373	443.492	438.563	509
chr5	68389610	68390524	Peak_141	4434	.	21.529	443.444	438.515	403
chr1	38273026	38274771	Peak_142	4416	.	20.5861	441.642	436.717	619
chr19	48893675	48894692	Peak_143	4348	.	28.8912	434.824	429.914	400
chr1	33116551	33117654	Peak_144	4348	.	18.6602	434.816	429.906	432
chr19	8509675	8510743	Peak_145	4294	.	19.2423	429.476	424.577	462
chr1	173990560	173992030	Peak_146	4249	.	23.3672	424.978	420.088	511
chr11	11862749	11864403	Peak_147	4225	.	15.5564	422.532	417.647	1020
chr5	43555992	43557645	Peak_148	4212	.	20.284	421.236	416.355	738
chr2	176045407	176046602	Peak_149	4193	.	21.2893	419.388	414.51	444
chr3	124930736	124931939	Peak_150	4171	.	18.9353	417.105	412.231	530
chr18	48494042	48495148	Peak_151	4157	.	26.28	415.763	410.892	562
chr7	73096949	73098548	Peak_152	4152	.	15.7129	415.257	410.387	545
chr16	48277977	48279059	Peak_153	4071	.	22.3463	407.138	402.282	554
chr12	27932601	27934002	Peak_154	4066	.	18.1986	406.692	401.836	801
chr21	11169306	11170587	Peak_155	4050	.	12.0804	405.035	400.182	669
chr9	114245007	114246924	Peak_156	3997	.	19.9735	399.752	394.909	1457
chr14	95622782	95624482	Peak_157	3958	.	17.7474	395.87	391.034	1216
chr2	175112481	175113860	Peak_158	3945	.	22.6209	394.504	389.67	523
chr19	58513385	58514518	Peak_159	3940	.	16.4561	394.073	389.24	612
chr9	19048852	19050158	Peak_160	3929	.	15.9214	392.902	388.071	759
chr17	15902166	15903958	Peak_161	3912	.	17.1349	391.291	386.463	1185
chr22	38901166	38902393	Peak_162	3910	.	15.7787	391.065	386.238	637
chr6	144163970	144165330	Peak_163	3895	.	20.9418	389.539	384.714	646
chr7	92218906	92219927	Peak_164	3889	.	13.4761	388.923	384.1	671
chr4	467192	468183	Peak_165	3882	.	14.9836	388.23	383.408	610
chr5	133339295	133341448	Peak_166	3872	.	20.2669	387.222	382.402	829
chr7	149156338	149158082	Peak_167	3870	.	21.6953	387.011	382.192	793
chr17	29297852	29298683	Peak_168	3868	.	15.7483	386.83	382.011	456
chr1	202112569	202114149	Peak_169	3852	.	19.4731	385.283	380.468	894
chr12	69632980	69634373	Peak_170	3848	.	17.2902	384.807	379.993	679
chr20	44717647	44718793	Peak_171	3839	.	22.2583	383.991	379.178	759
chr7	140396194	140397276	Peak_172	3795	.	16.8826	379.561	374.757	550
chr13	53024163	53024995	Peak_173	3779	.	20.3051	377.938	373.138	394
chr7	105751957	105753284	Peak_174	3778	.	15.0181	377.855	373.055	494
chr14	105766150	105767658	Peak_175	3757	.	18.5848	375.78	370.985	973
chr17	80476835	80477647	Peak_176	3735	.	19.0598	373.537	368.746	431
chr16	4320980	4322677	Peak_177	3724	.	19.4158	372.418	367.63	986
chr10	98345732	98347326	Peak_178	3714	.	18.1508	371.44	366.654	771
chr2	183902079	183903639	Peak_179	3713	.	28.6809	371.37	366.585	610
chr15	101834522	101836031	Peak_180	3685	.	17.3799	368.59	363.81	608
chr10	94050768	94051640	Peak_181	3666	.	16.0524	366.602	361.827	407
chr15	72765990	72768007	Peak_182	3655	.	17.2512	365.522	360.749	455
chr11	393672	395408	Peak_183	3651	.	17.5561	365.134	360.361	719
chr5	137088963	137091095	Peak_184	3644	.	15.4273	364.468	359.697	822
chr12	53894617	53895604	Peak_185	3634	.	18.4432	363.43	358.661	542
chr19	30205754	30206866	Peak_186	3602	.	15.7718	360.218	355.457	627
chr3	160282130	160283531	Peak_187	3587	.	16.1861	358.745	353.987	694
chr7	23338754	23339582	Peak_188	3583	.	15.1099	358.304	353.547	317
chr8	57905276	57906548	Peak_189	3578	.	17.4914	357.849	353.093	887
chr9	33817137	33818335	Peak_190	3566	.	23.2448	356.629	351.875	592
chr8	41908500	41910005	Peak_191	3559	.	28.1351	355.974	351.222	904
chr8	11141821	11142750	Peak_192	3552	.	14.628	355.255	350.505	310
chr3	157827647	157828604	Peak_193	3544	.	14.6842	354.428	349.681	424
chr2	18740950	18742181	Peak_194	3539	.	20.5624	353.975	349.228	768
chr2	217362669	217364259	Peak_195	3528	.	19.4069	352.862	348.118	1081
chr16	15068827	15069784	Peak_196	3528	.	13.6074	352.853	348.109	328
chr10	103824908	103826155	Peak_197	3510	.	18.3382	351.084	346.345	526
chr8	87526692	87527477	Peak_198	3500	.	20.849	350.032	345.295	286
chr15	68569609	68571134	Peak_199	3499	.	16.0091	349.981	345.245	614
chr14	45553111	45554028	Peak_200	3491	.	12.7728	349.151	344.416	429
chr11	9482518	9483357	Peak_201	3471	.	19.3145	347.108	342.379	383
chr3	64008541	64009367	Peak_202	3464	.	17.6068	346.417	341.69	414
chr1	52607318	52608660	Peak_203	3451	.	17.5444	345.153	340.429	914
chr3	196729427	196731293	Peak_204	3445	.	17.317	344.593	339.871	485
chr18	5237151	5238977	Peak_205	3445	.	17.0018	344.563	339.841	857
chr3	132377947	132379848	Peak_206	3441	.	13.4386	344.101	339.38	1269
chr14	69864100	69865912	Peak_207	3435	.	17.2362	343.577	338.857	657
chr1	40723009	40724635	Peak_208	3424	.	12.609	342.459	337.742	453
chr20	25676743	25677716	Peak_209	3418	.	18.6177	341.832	337.117	558
chr1	166844774	166845701	Peak_210	3417	.	18.173	341.712	336.997	493
chr2	105945554	105947067	Peak_211	3408	.	23.1362	340.819	336.106	836
chr9	88419870	88421053	Peak_212	3405	.	22.288	340.543	335.83	637
chr3	50396089	50397157	Peak_213	3391	.	22.2578	339.167	334.458	665
chr20	3139613	3140743	Peak_214	3388	.	17.3154	338.849	334.141	738
chr1	109505265	109506256	Peak_215	3388	.	17.8414	338.807	334.099	584
chr9	35071508	35072707	Peak_217	3380	.	13.4308	338.035	333.329	530
chr16	22308552	22309511	Peak_218	3375	.	17.7979	337.536	332.831	402
chr9	37799912	37801758	Peak_219	3372	.	18.7924	337.229	332.525	1224
chr7	154795046	154795918	Peak_220	3368	.	15.5479	336.839	332.136	378
chr7	44529572	44530559	Peak_221	3366	.	15.7797	336.631	331.929	470
chr5	56247196	56248518	Peak_222	3359	.	20.4397	335.989	331.288	520
chr19	42746093	42747568	Peak_223	3358	.	26.6867	335.842	331.142	549
chr19	2150719	2151658	Peak_224	3356	.	15.4947	335.631	330.932	567
chr1	8021197	8022330	Peak_225	3353	.	17.9074	335.328	330.629	769
chr1	180471038	180472267	Peak_226	3328	.	14.6253	332.838	328.146	792
chr14	89029198	89030048	Peak_227	3320	.	15.4061	332.016	327.326	434
chr2	99224495	99225897	Peak_228	3315	.	16.594	331.599	326.91	737
chr6	24402908	24403996	Peak_229	3313	.	15.7593	331.346	326.658	507
chr7	32529388	32530213	Peak_230	3306	.	11.2703	330.669	325.983	465
chr12	32831888	32833036	Peak_231	3301	.	15.7225	330.132	325.448	598
chr7	40173624	40175085	Peak_232	3287	.	13.4317	328.77	324.09	392
chr11	126152302	126153468	Peak_233	3286	.	13.7429	328.671	323.991	724
chr17	79603446	79604326	Peak_234	3281	.	14.0638	328.105	323.426	492
chr6	170151153	170152728	Peak_235	3270	.	21.1903	327.062	322.386	798
chr9	96213123	96215424	Peak_236	3263	.	18.5008	326.319	321.645	1533
chr18	56530762	56531726	Peak_237	3262	.	30.6182	326.24	321.566	271
chr6	41040668	41041630	Peak_238	3230	.	17.7842	323.015	318.349	396
chr11	129871393	129872571	Peak_239	3228	.	21.2549	322.868	318.203	519
chr14	75517547	75518282	Peak_240	3216	.	15.4464	321.665	317.003	378
chr1	200638475	200639480	Peak_241	3193	.	17.2017	319.34	314.683	318
chr3	126373225	126374117	Peak_242	3190	.	12.7052	319.089	314.433	479
chr2	85581055	85582509	Peak_243	3187	.	14.8493	318.707	314.052	925
chr3	135913584	135915249	Peak_244	3179	.	15.9656	317.924	313.271	1315
chr15	77223889	77224804	Peak_245	3168	.	16.1153	316.813	312.163	406
chr22	50638494	50640555	Peak_246	3160	.	19.605	316.086	311.438	1249
chr3	141120536	141122010	Peak_247	3154	.	12.8255	315.408	310.762	495
chr9	138392243	138393329	Peak_248	3150	.	14.5311	315.004	310.359	360
chr5	132298329	132300005	Peak_249	3149	.	17.6282	314.959	310.313	701
chr3	121467812	121468631	Peak_250	3149	.	11.9666	314.93	310.285	367
chr21	44313175	44314226	Peak_251	3148	.	16.9712	314.848	310.203	491
chr3	15247503	15248935	Peak_252	3147	.	17.5059	314.711	310.067	545
chr10	131908354	131909281	Peak_253	3141	.	13.4225	314.163	309.52	602
chr15	40226137	40227096	Peak_254	3126	.	16.3998	312.674	308.036	380
chr18	12407661	12408819	Peak_255	3124	.	18.5929	312.415	307.778	514
chr10	104180525	104182233	Peak_256	3118	.	13.1541	311.884	307.249	575
chr4	15656122	15658030	Peak_257	3115	.	19.8142	311.593	306.958	572
chr2	160568454	160569878	Peak_258	3114	.	16.3582	311.44	306.806	758
chr1	70686848	70687992	Peak_259	3109	.	17.9265	310.923	306.29	624
chr1	87170270	87171233	Peak_260	3108	.	14.2258	310.816	306.183	488
chr15	23207712	23208989	Peak_261	3096	.	17.3236	309.664	305.034	691
chr7	6629357	6630410	Peak_262	3083	.	17.0844	308.333	303.707	417
chr3	128722106	128723095	Peak_263	3071	.	15.6101	307.156	302.533	599
chr1	90460474	90461441	Peak_264	3071	.	17.759	307.101	302.478	469
chr17	47438708	47439617	Peak_265	3061	.	16.5567	306.121	301.501	439
chr15	34330449	34331596	Peak_266	3055	.	26.5021	305.572	300.953	738
chr11	46866954	46868048	Peak_267	3039	.	13.6031	303.978	299.364	639
chr7	2394222	2395180	Peak_268	3017	.	17.8142	301.77	297.161	463
chr20	32699408	32700176	Peak_269	3017	.	12.4014	301.719	297.111	427
chr20	33412540	33413719	Peak_270	3004	.	15.1453	300.491	295.886	703
chr11	61196614	61197938	Peak_271	2996	.	16.9133	299.626	295.023	577
chr7	98475927	98477362	Peak_272	2991	.	14.3293	299.152	294.55	605
chr13	25875704	25876470	Peak_273	2990	.	9.91516	299.093	294.492	471
chr7	152372577	152373416	Peak_274	2986	.	11.5762	298.697	294.097	446
chr14	95235672	95236945	Peak_275	2984	.	19.2307	298.424	293.825	467
chr5	131704929	131706393	Peak_276	2965	.	13.094	296.594	292	547
chr8	103875243	103877222	Peak_277	2965	.	14.618	296.586	291.991	1592
chr15	38746092	38746900	Peak_278	2963	.	11.9135	296.397	291.803	396
chr19	11070682	11072430	Peak_279	2963	.	14.2893	296.387	291.794	427
chr7	74488583	74490012	Peak_280	2959	.	11.695	295.905	291.312	760
chr11	8985396	8986640	Peak_281	2955	.	13.2726	295.578	290.986	814
chr22	50219930	50221197	Peak_282	2952	.	13.323	295.269	290.679	747
chr5	472223	473208	Peak_283	2944	.	17.2803	294.441	289.853	613
chr5	145826786	145827902	Peak_284	2933	.	14.9155	293.324	288.739	394
chr17	5341834	5342713	Peak_285	2930	.	14.5075	293.043	288.459	419
chr19	2235292	2237597	Peak_286	2919	.	14.2657	291.91	287.329	1758
chr2	172290565	172291501	Peak_287	2910	.	20.9973	291.061	286.481	409
chr12	69863817	69864866	Peak_288	2906	.	15.6299	290.641	286.063	411
chr3	182511251	182512397	Peak_289	2905	.	18.925	290.586	286.008	440
chr3	120067007	120068360	Peak_290	2903	.	12.9725	290.311	285.734	927
chr3	51428552	51429832	Peak_291	2897	.	20.1213	289.761	285.186	370
chr2	88469501	88470478	Peak_292	2887	.	20.6474	288.751	284.178	553
chr20	50807588	50808957	Peak_293	2883	.	14.8555	288.383	283.811	506
chr2	37423541	37424413	Peak_294	2873	.	17.8091	287.326	282.757	360
chr11	66383282	66384070	Peak_295	2873	.	13.0678	287.322	282.752	427
chr2	27592661	27594395	Peak_296	2869	.	16.9932	286.905	282.337	1128
chr19	1438158	1439007	Peak_297	2841	.	14.8267	284.161	279.6	461
chr12	46122548	46124936	Peak_298	2837	.	25.1532	283.772	279.213	1841
chr3	128901840	128903502	Peak_299	2827	.	9.23268	282.741	278.184	1154
chr1	224621430	224622233	Peak_300	2823	.	25.0662	282.331	277.775	465
chr15	75870564	75871940	Peak_301	2821	.	15.3385	282.178	277.622	589
chr5	179050081	179052235	Peak_302	2817	.	12.1699	281.706	277.152	425
chr2	198363522	198364712	Peak_303	2815	.	15.7529	281.528	276.975	850
chr10	7829390	7831145	Peak_304	2808	.	13.0748	280.808	276.257	954
chr1	117908975	117910212	Peak_305	2806	.	16.4652	280.642	276.09	716
chr4	110354314	110356068	Peak_306	2796	.	21.7961	279.669	275.121	813
chr4	185393466	185395207	Peak_307	2786	.	23.4299	278.687	274.141	1139
chr4	103421855	103423677	Peak_308	2786	.	20.8668	278.609	274.063	889
chr6	17705917	17707263	Peak_309	2779	.	17.6062	277.987	273.443	487
chr15	83478204	83479541	Peak_310	2779	.	14.3795	277.941	273.398	729
chr19	30432995	30434041	Peak_311	2778	.	14.0289	277.814	273.271	639
chr7	108209482	108211225	Peak_312	2777	.	10.2413	277.718	273.175	416
chr8	61429498	61430388	Peak_313	2771	.	17.9086	277.136	272.595	482
chr1	53191931	53192955	Peak_314	2762	.	20.251	276.27	271.731	405
chr13	60970163	60972311	Peak_315	2759	.	19.1475	275.987	271.45	1669
chr8	74888337	74889099	Peak_316	2754	.	17.0815	275.444	270.908	324
chr1	53386519	53387617	Peak_317	2746	.	14.6396	274.63	270.097	709
chr19	29703361	29704440	Peak_318	2740	.	19.6169	274.074	269.542	325
chr21	47705587	47706400	Peak_319	2737	.	20.7889	273.713	269.182	363
chr20	21283569	21284483	Peak_320	2735	.	12.9407	273.53	268.999	583
chr12	49109851	49111031	Peak_321	2732	.	13.1774	273.216	268.686	442
chr3	127308663	127310060	Peak_322	2725	.	14.9017	272.552	268.025	688
chr1	197871192	197872356	Peak_323	2725	.	15.7169	272.505	267.978	581
chr10	6205345	6206586	Peak_324	2721	.	17.1657	272.121	267.595	617
chr10	120839255	120840866	Peak_325	2720	.	13.8264	272.009	267.484	809
chr5	114879568	114880539	Peak_326	2710	.	14.5399	271.083	266.56	613
chr16	67926992	67928209	Peak_327	2707	.	16.3231	270.737	266.215	438
chr7	140372644	140373455	Peak_328	2702	.	12.0716	270.239	265.718	356
chr15	65902726	65904195	Peak_329	2702	.	12.9255	270.231	265.711	602
chr7	150065014	150066795	Peak_330	2696	.	10.3439	269.631	265.112	427
chr3	184428546	184429958	Peak_331	2686	.	13.403	268.612	264.096	940
chr3	196013997	196015256	Peak_332	2684	.	11.169	268.459	263.944	889
chr5	179105011	179106703	Peak_333	2682	.	13.1798	268.287	263.773	949
chr7	127031446	127033443	Peak_334	2675	.	14.3803	267.547	263.035	506
chr17	19770205	19771623	Peak_335	2670	.	15.1322	267.08	262.569	751
chr6	52441497	52442629	Peak_336	2670	.	16.1795	267.037	262.526	679
chr13	41767709	41768922	Peak_337	2663	.	14.3405	266.371	261.862	887
chr17	18161294	18162520	Peak_338	2663	.	14.3604	266.371	261.862	581
chr7	56031874	56033013	Peak_339	2645	.	16.0838	264.577	260.073	805
chr3	121263989	121264973	Peak_340	2642	.	12.1522	264.258	259.755	577
chr7	148822600	148824258	Peak_341	2642	.	11.0626	264.225	259.722	618
chr4	52965	53870	Peak_342	2631	.	6.91661	263.188	258.688	407
chr7	5084732	5086367	Peak_343	2629	.	13.1903	262.911	258.411	971
chr19	45004030	45004892	Peak_344	2627	.	21.2467	262.784	258.285	409
chr3	45730722	45731550	Peak_345	2625	.	18.8403	262.547	258.049	434
chr1	41706862	41708461	Peak_346	2616	.	13.7336	261.602	257.107	679
chr7	75676822	75678120	Peak_347	2614	.	12.4197	261.427	256.933	814
chr1	9188192	9189237	Peak_348	2610	.	18.0032	261.009	256.516	728
chr11	77790324	77791211	Peak_349	2609	.	12.0595	260.967	256.473	452
chr3	169898477	169899565	Peak_350	2606	.	13.1193	260.639	256.146	497
chr11	66823703	66825058	Peak_351	2604	.	13.6956	260.446	255.954	738
chr7	149535270	149536123	Peak_352	2604	.	10.1338	260.439	255.947	393
chr3	125238345	125239456	Peak_353	2599	.	13.0589	259.956	255.465	471
chr3	196594156	196595594	Peak_354	2595	.	14.5061	259.512	255.023	835
chr9	117349775	117350693	Peak_355	2595	.	13.0839	259.505	255.015	414
chr7	107384148	107385182	Peak_356	2592	.	13.3902	259.207	254.719	623
chr20	3026398	3027756	Peak_357	2591	.	15.4422	259.174	254.686	508
chr4	56261723	56263026	Peak_358	2590	.	16.7965	259.092	254.604	824
chr12	9216829	9217762	Peak_359	2589	.	17.2601	258.906	254.418	650
chr15	91072756	91074073	Peak_360	2584	.	17.4523	258.453	253.967	634
chr22	21335803	21337019	Peak_361	2583	.	13.0662	258.372	253.886	527
chr9	90340884	90341736	Peak_362	2582	.	12.2222	258.284	253.799	382
chr5	141348393	141349349	Peak_363	2581	.	11.1052	258.166	253.682	440
chr11	74204166	74205509	Peak_364	2570	.	14.0413	257.007	252.526	363
chr9	34328730	34330328	Peak_365	2566	.	9.62778	256.619	252.139	460
chr17	39966995	39968787	Peak_366	2561	.	13.3845	256.173	251.694	901
chr7	2598439	2599977	Peak_367	2559	.	13.2742	255.92	251.442	594
chr17	72847873	72848704	Peak_368	2558	.	13.9815	255.842	251.365	545
chr2	75873559	75874624	Peak_369	2558	.	13.6137	255.827	251.35	527
chr17	34899942	34902228	Peak_370	2555	.	18.8478	255.537	251.061	1830
chr11	2420910	2422582	Peak_371	2555	.	12.6734	255.533	251.057	1286
chr5	107716287	107717906	Peak_372	2550	.	17.4581	255.091	250.616	809
chr12	111051727	111052482	Peak_373	2542	.	18.8924	254.279	249.807	401
chr9	102860813	102862255	Peak_374	2542	.	17.4249	254.203	249.731	948
chr19	10216815	10217745	Peak_375	2539	.	13.5778	253.953	249.481	359
chr16	3450596	3451823	Peak_376	2536	.	14.2773	253.625	249.155	806
chr11	35684129	35685048	Peak_377	2535	.	12.9431	253.533	249.063	425
chr15	44829273	44830161	Peak_378	2535	.	13.9017	253.517	249.047	435
chr16	4674595	4675690	Peak_379	2533	.	16.3681	253.391	248.921	362
chr20	60716980	60719687	Peak_380	2532	.	17.0671	253.218	248.749	1170
chr3	101292559	101293902	Peak_381	2530	.	16.8316	253.095	248.627	760
chr17	66031726	66032622	Peak_382	2530	.	16.1494	253.056	248.588	352
chr20	62586825	62588109	Peak_383	2519	.	12.5653	251.92	247.455	819
chr7	765786	767102	Peak_384	2516	.	17.3402	251.67	247.207	754
chr3	57541360	57542808	Peak_385	2512	.	12.0491	251.22	246.758	840
chr8	28558394	28559919	Peak_386	2510	.	14.3925	251.084	246.623	952
chr20	42086381	42087185	Peak_387	2505	.	16.0235	250.597	246.137	435
chr11	43333395	43334171	Peak_388	2501	.	14.1524	250.108	245.65	353
chr11	9594488	9596893	Peak_389	2500	.	17.8911	250.069	245.611	999
chr1	113217042	113218193	Peak_390	2498	.	12.7413	249.812	245.354	502
chr1	36929079	36930235	Peak_391	2497	.	11.5854	249.719	245.262	792
chr5	111496416	111497275	Peak_392	2496	.	12.4799	249.693	245.236	275
chr8	42948049	42949209	Peak_393	2490	.	13.6093	249.034	244.579	799
chr15	31283186	31284533	Peak_394	2484	.	11.9191	248.417	243.964	951
chr19	19430693	19432303	Peak_395	2479	.	14.4911	247.941	243.49	1111
chr3	196668875	196670222	Peak_396	2479	.	14.4911	247.941	243.49	887
chr20	47662726	47663874	Peak_397	2477	.	13.6824	247.726	243.276	517
chr8	42010368	42011334	Peak_398	2475	.	15.3898	247.512	243.063	529
chr13	115000084	115001024	Peak_399	2475	.	17.8014	247.51	243.06	499
chr7	131012423	131013368	Peak_400	2474	.	10.6239	247.463	243.013	439
chr10	120863587	120864552	Peak_401	2472	.	17.0314	247.268	242.819	267
chr7	102987983	102988753	Peak_402	2468	.	11.6427	246.828	242.38	372
chr9	136242157	136243627	Peak_403	2465	.	15.0661	246.503	242.057	616
chr1	100503476	100504867	Peak_404	2464	.	16.435	246.49	242.044	803
chr15	41135485	41137170	Peak_405	2458	.	15.4541	245.863	241.419	510
chr14	91975680	91977680	Peak_406	2457	.	11.6118	245.748	241.305	1368
chr2	170683821	170685064	Peak_407	2456	.	15.7967	245.694	241.251	410
chr6	34759540	34760823	Peak_408	2455	.	13.2691	245.511	241.069	559
chr20	32890107	32891714	Peak_409	2453	.	10.5574	245.387	240.945	558
chr2	225448880	225450166	Peak_410	2451	.	21.0589	245.186	240.745	707
chr9	110045391	110046557	Peak_411	2451	.	11.8074	245.149	240.708	759
chr11	110166395	110167815	Peak_412	2438	.	18.35	243.877	239.44	650
chr3	47866117	47867170	Peak_413	2438	.	14.3606	243.836	239.399	518
chr9	139939103	139941172	Peak_414	2433	.	14.2257	243.345	238.91	1130
chr12	67662102	67664414	Peak_415	2432	.	13.1925	243.233	238.798	1852
chr2	128458725	128460104	Peak_416	2431	.	16.4007	243.127	238.693	888
chr22	50765124	50766365	Peak_417	2420	.	15.6456	242.033	237.603	644
chr11	2398633	2399574	Peak_418	2417	.	15.6127	241.764	237.335	306
chr1	1208186	1209776	Peak_419	2414	.	14.2513	241.484	237.055	855
chr4	85886607	85887874	Peak_420	2410	.	23.3109	241.069	236.642	624
chr1	63153211	63154584	Peak_421	2404	.	15.3526	240.416	235.991	636
chr3	10182930	10184467	Peak_422	2400	.	20.1185	240.087	235.664	824
chr16	56458555	56459639	Peak_423	2400	.	18.8108	240.052	235.628	620
chrX	57618328	57619369	Peak_424	2386	.	24.8893	238.654	234.235	482
chrX	54070119	54070873	Peak_425	2386	.	16.9086	238.603	234.184	473
chr8	42995309	42996717	Peak_426	2384	.	14.2555	238.448	234.03	599
chr10	94333061	94334406	Peak_427	2383	.	12.264	238.36	233.943	505
chr16	3550837	3551654	Peak_428	2383	.	12.299	238.36	233.943	310
chr17	54910517	54912750	Peak_429	2382	.	14.4912	238.272	233.855	1179
chr5	137910475	137911299	Peak_430	2382	.	11.3802	238.227	233.81	418
chr14	93650496	93651831	Peak_431	2381	.	12.3925	238.193	233.776	412
chr17	28927162	28928601	Peak_432	2380	.	13.5945	238.045	233.629	434
chr4	39978199	39980048	Peak_433	2377	.	12.6729	237.701	233.286	455
chr12	44229270	44230430	Peak_434	2374	.	15.6475	237.417	233.002	430
chr2	239111094	239112950	Peak_435	2368	.	19.148	236.826	232.414	925
chr2	242575518	242577662	Peak_436	2366	.	18.2798	236.662	232.25	816
chr8	99837284	99837947	Peak_437	2362	.	16.5572	236.239	231.829	394
chr17	80605628	80606473	Peak_438	2361	.	13.6321	236.163	231.753	482
chr15	75229681	75230610	Peak_439	2358	.	11.7855	235.883	231.474	461
chr22	20861546	20862496	Peak_440	2354	.	11.5043	235.413	231.006	442
chr2	200819811	200821376	Peak_441	2351	.	14.4062	235.19	230.783	898
chr10	35624844	35625780	Peak_442	2351	.	18.7718	235.189	230.782	304
chr6	125622519	125623270	Peak_443	2349	.	23.4088	234.954	230.549	402
chr15	50978280	50979618	Peak_444	2348	.	16.5724	234.9	230.495	1030
chr15	28982499	28983567	Peak_445	2347	.	15.3433	234.75	230.345	470
chr3	126193432	126194863	Peak_446	2347	.	13.7743	234.718	230.313	847
chr20	56884668	56885424	Peak_447	2345	.	18.8042	234.508	230.104	305
chr20	2450846	2451660	Peak_448	2341	.	15.8766	234.162	229.759	452
chr3	131080538	131081459	Peak_449	2341	.	9.78214	234.116	229.714	364
chr17	45608543	45609636	Peak_450	2339	.	22.6402	233.992	229.59	448
chr4	184365014	184366544	Peak_451	2338	.	13.9472	233.869	229.468	906
chr10	27793131	27793966	Peak_452	2337	.	12.233	233.766	229.365	310
chr13	21099225	21100253	Peak_453	2336	.	11.4153	233.632	229.232	488
chr17	20945715	20946418	Peak_454	2332	.	13.9453	233.294	228.895	367
chr18	29671600	29673424	Peak_455	2331	.	20.0635	233.197	228.798	1301
chr7	6745615	6746818	Peak_456	2331	.	13.6076	233.127	228.729	733
chr5	54602716	54603669	Peak_457	2330	.	14.1701	233.066	228.667	569
chr1	201951516	201952652	Peak_458	2327	.	14.6562	232.726	228.328	463
chr19	35167672	35169081	Peak_459	2322	.	13.0894	232.275	227.88	1011
chr16	2801763	2803605	Peak_460	2321	.	11.5895	232.154	227.759	679
chr17	73892331	73893221	Peak_461	2319	.	13.3573	231.99	227.595	508
chr19	14628507	14629339	Peak_462	2315	.	13.8384	231.543	227.151	493
chr19	41769987	41771031	Peak_463	2312	.	19.1122	231.279	226.887	469
chr11	113185237	113186175	Peak_464	2309	.	11.8645	230.968	226.578	328
chr5	179247552	179248552	Peak_465	2309	.	11.8038	230.957	226.566	550
chr7	155436545	155438137	Peak_466	2306	.	11.0747	230.69	226.301	978
chr10	103815343	103816348	Peak_467	2302	.	14.7738	230.231	225.843	522
chr19	13228875	13229655	Peak_468	2300	.	13.9279	230.096	225.709	470
chr3	193310807	193311662	Peak_469	2300	.	10.3258	230.017	225.63	294
chr3	43731660	43733201	Peak_470	2299	.	15.1418	229.924	225.537	767
chr5	138940339	138942005	Peak_471	2298	.	11.8303	229.878	225.492	1224
chr7	39989176	39991673	Peak_472	2295	.	15.8083	229.578	225.192	1915
chr10	127584253	127585414	Peak_473	2295	.	8.73221	229.526	225.141	596
chr17	29232939	29233928	Peak_474	2292	.	13.3824	229.264	224.881	441
chr17	80022889	80024271	Peak_475	2290	.	13.9592	229.066	224.682	603
chr11	62493638	62495081	Peak_476	2289	.	11.4753	228.924	224.541	847
chr7	23221285	23222477	Peak_477	2281	.	12.1585	228.196	223.817	637
chr11	43665552	43666528	Peak_478	2281	.	14.11	228.137	223.757	400
chr7	129141794	129142943	Peak_479	2276	.	12.3235	227.679	223.301	617
chr3	184016897	184017647	Peak_480	2272	.	9.45383	227.284	222.908	308
chr16	67225853	67226689	Peak_481	2272	.	13.9235	227.222	222.846	381
chr12	6492681	6494598	Peak_482	2270	.	11.1548	227.021	222.646	792
chr15	31195905	31196615	Peak_483	2269	.	13.2992	226.976	222.601	384
chr10	123733884	123735008	Peak_484	2269	.	13.6426	226.909	222.534	609
chr11	13690063	13691122	Peak_485	2265	.	14.037	226.519	222.146	509
chr5	149865171	149866633	Peak_486	2259	.	15.6198	225.915	221.544	879
chr14	74252633	74254656	Peak_487	2258	.	13.2368	225.834	221.464	1228
chr11	63438119	63439693	Peak_488	2250	.	10.7929	225.072	220.705	1201
chr14	45721575	45723474	Peak_489	2248	.	12.6226	224.804	220.437	1122
chr20	57616861	57618347	Peak_490	2244	.	10.9479	224.421	220.056	750
chr6	43196501	43197454	Peak_491	2243	.	13.9417	224.349	219.984	537
chr16	30620865	30621754	Peak_492	2241	.	10.8263	224.189	219.825	506
chr5	154133834	154134751	Peak_493	2237	.	12.8248	223.77	219.408	506
chr9	129567107	129567938	Peak_494	2236	.	11.6631	223.607	219.245	331
chr12	113622634	113623957	Peak_495	2231	.	14.5066	223.1	218.741	399
chr8	17104333	17105259	Peak_496	2229	.	14.7483	222.974	218.615	323
chr22	29168463	29169576	Peak_497	2227	.	14.8143	222.73	218.372	330
chr2	240322921	240324063	Peak_498	2227	.	14.8395	222.73	218.372	302
chr5	98263599	98264631	Peak_499	2224	.	18.3766	222.458	218.101	553
chr11	107992096	107992945	Peak_500	2224	.	11.8914	222.435	218.078	370
chr3	135915401	135916284	Peak_501	2218	.	10.2916	221.875	217.521	367
chr3	156877029	156878536	Peak_502	2216	.	9.18823	221.611	217.258	1143
chr12	21809758	21810864	Peak_503	2215	.	11.0895	221.531	217.178	757
chr10	115613813	115615315	Peak_504	2215	.	12.7451	221.521	217.168	863
chr17	79827331	79830407	Peak_505	2215	.	12.7451	221.521	217.168	2306
chr3	40498638	40499566	Peak_506	2214	.	15.8252	221.406	217.053	414
chr19	11485171	11485749	Peak_507	2212	.	11.1747	221.232	216.88	266
chr20	2820562	2821674	Peak_508	2211	.	16.0475	221.195	216.843	530
chr1	197743681	197745339	Peak_509	2210	.	15.7296	221.093	216.742	454
chr21	34915186	34916017	Peak_510	2204	.	15.2228	220.449	216.101	382
chr16	67876008	67876948	Peak_511	2194	.	16.1415	219.416	215.071	348
chr6	157097943	157101215	Peak_512	2187	.	18.7431	218.709	214.367	2712
chr14	64969838	64972054	Peak_513	2182	.	13.3771	218.272	213.931	1852
chr5	72111760	72113309	Peak_514	2181	.	12.6055	218.157	213.817	560
chr10	104209842	104211067	Peak_515	2177	.	14.1215	217.736	213.398	764
chr8	146052109	146053759	Peak_516	2174	.	13.1347	217.488	213.151	1017
chr17	17206421	17207352	Peak_517	2174	.	14.916	217.465	213.128	432
chr20	16710409	16711259	Peak_518	2174	.	15.5351	217.434	213.097	350
chr5	81573518	81574738	Peak_519	2172	.	16.3057	217.288	212.951	441
chr12	46383448	46384461	Peak_520	2170	.	12.3702	217	212.664	605
chr18	19192105	19192893	Peak_521	2168	.	9.78633	216.827	212.492	376
chr9	140099610	140100673	Peak_522	2165	.	13.2293	216.566	212.232	698
chr7	99063162	99064149	Peak_523	2165	.	11.5479	216.514	212.18	394
chr17	61851418	61852419	Peak_524	2163	.	12.2353	216.316	211.983	404
chr20	34251784	34252984	Peak_525	2158	.	11.329	215.851	211.519	779
chr8	144680073	144681813	Peak_526	2145	.	13.6835	214.505	210.179	344
chr7	151215892	151216827	Peak_527	2144	.	14.9046	214.435	210.109	573
chr15	69744532	69746208	Peak_528	2143	.	9.87363	214.355	210.03	837
chr4	2844656	2846299	Peak_529	2132	.	21.0408	213.26	208.939	745
chr17	30668375	30669524	Peak_530	2129	.	10.5928	212.907	208.587	803
chr20	34329177	34330333	Peak_531	2128	.	12.2937	212.868	208.549	781
chr15	65822607	65823688	Peak_532	2128	.	9.67997	212.824	208.505	371
chr3	33154951	33156185	Peak_533	2126	.	14.7332	212.684	208.366	828
chrX	106361321	106362267	Peak_534	2123	.	16.0365	212.342	208.025	595
chr19	4063628	4066007	Peak_535	2123	.	14.1146	212.326	208.008	2048
chr7	96338593	96339313	Peak_536	2122	.	12.6957	212.243	207.926	339
chr22	20849255	20850521	Peak_537	2120	.	11.9862	212.006	207.69	473
chr20	47538102	47538949	Peak_538	2113	.	11.7647	211.342	207.028	434
chr9	35604756	35606394	Peak_539	2108	.	13.8276	210.877	206.565	796
chr14	75229828	75230650	Peak_540	2107	.	13.4034	210.738	206.426	324
chr14	92505719	92506773	Peak_541	2106	.	9.95376	210.675	206.364	486
chr16	698197	700498	Peak_542	2102	.	13.4101	210.256	205.946	812
chr22	50745200	50746158	Peak_543	2099	.	12.6125	209.998	205.689	623
chr17	27717062	27718088	Peak_544	2099	.	13.5504	209.996	205.687	514
chr11	9405978	9406931	Peak_545	2097	.	9.97815	209.758	205.45	386
chr3	131221249	131222051	Peak_546	2094	.	11.1637	209.424	205.118	394
chr22	40390361	40392245	Peak_547	2093	.	8.75294	209.391	205.085	884
chr6	42946094	42947355	Peak_548	2085	.	12.4635	208.553	204.249	599
chr12	8184947	8185955	Peak_549	2084	.	13.2895	208.444	204.141	509
chr16	2033966	2035231	Peak_550	2084	.	13.7386	208.407	204.105	432
chr3	196438813	196440127	Peak_551	2083	.	10.2527	208.357	204.055	696
chr14	74035672	74036655	Peak_552	2080	.	11.6174	208.086	203.785	490
chr19	11039313	11040426	Peak_553	2076	.	12.1957	207.635	203.335	391
chr13	25086318	25087278	Peak_554	2074	.	8.70736	207.488	203.189	377
chr5	171432438	171433836	Peak_555	2073	.	12.0974	207.348	203.049	994
chr5	74161429	74162521	Peak_556	2073	.	12.7296	207.308	203.01	434
chr14	103799454	103800971	Peak_557	2072	.	11.0953	207.299	203.001	639
chr10	131934459	131935781	Peak_558	2072	.	13.2439	207.299	203.001	464
chr5	114961027	114961912	Peak_559	2066	.	10.2019	206.621	202.325	508
chr2	198380426	198381474	Peak_560	2065	.	15.3012	206.527	202.232	521
chr15	102264017	102264760	Peak_561	2061	.	13.2211	206.156	201.862	414
chr9	35096077	35096742	Peak_562	2059	.	11.2591	205.998	201.705	310
chr5	138533344	138534174	Peak_563	2057	.	12.8526	205.755	201.463	465
chr2	73495641	73497115	Peak_564	2057	.	17.3948	205.749	201.457	572
chr17	6543099	6544783	Peak_565	2055	.	11.2758	205.51	201.218	890
chr7	102937728	102938421	Peak_566	2053	.	13.0268	205.356	201.065	340
chr8	9413308	9414289	Peak_567	2049	.	11.2415	204.931	200.641	348
chr8	98656182	98658042	Peak_568	2049	.	12.2366	204.909	200.62	496
chr19	57831434	57832790	Peak_569	2048	.	12.1069	204.832	200.544	589
chr12	125051160	125052136	Peak_570	2048	.	16.2257	204.828	200.539	706
chr1	16693574	16694312	Peak_571	2047	.	15.4119	204.716	200.428	378
chr15	23931605	23932576	Peak_572	2046	.	16.6679	204.602	200.314	581
chr2	9614413	9615569	Peak_573	2042	.	14.5966	204.237	199.951	525
chr12	120972013	120973041	Peak_574	2037	.	13.5232	203.78	199.495	353
chr12	49075370	49076055	Peak_575	2032	.	10.9781	203.292	199.009	410
chr3	128444828	128445779	Peak_576	2032	.	10.9781	203.292	199.009	388
chr13	26795438	26797035	Peak_577	2027	.	8.74826	202.796	198.515	354
chr10	25011500	25013183	Peak_578	2026	.	13.9326	202.654	198.374	694
chr1	2160205	2163196	Peak_579	2023	.	10.1006	202.34	198.061	1322
chr16	9185390	9186697	Peak_580	2023	.	14.94	202.314	198.035	542
chr1	157015033	157016214	Peak_581	2015	.	11.9673	201.534	197.259	430
chr7	105161967	105163246	Peak_582	2012	.	11.1162	201.246	196.971	612
chr12	32112068	32113011	Peak_583	2009	.	11.6418	200.989	196.715	556
chr10	11784301	11785439	Peak_584	2008	.	15.8373	200.817	196.543	352
chr19	5977143	5978560	Peak_585	2007	.	11.8421	200.772	196.498	737
chr16	57278906	57279851	Peak_586	2007	.	12.6201	200.719	196.446	361
chr17	79369722	79371681	Peak_587	2006	.	10.4194	200.607	196.334	773
chr2	177133921	177134780	Peak_588	2003	.	13.3796	200.327	196.056	382
chr7	116502380	116503393	Peak_589	2001	.	9.17257	200.176	195.905	518
chr1	36915624	36916488	Peak_590	1999	.	9.3077	199.953	195.683	376
chr12	54718820	54719453	Peak_591	1999	.	10.8389	199.908	195.638	261
chr19	15442145	15444029	Peak_592	1998	.	14.1984	199.829	195.56	881
chr16	11835930	11837280	Peak_593	1998	.	11.1249	199.807	195.538	493
chr8	137542490	137543532	Peak_594	1995	.	12.5766	199.599	195.33	604
chr16	89939223	89940277	Peak_595	1992	.	13.0031	199.29	195.023	408
chr9	139009504	139011618	Peak_596	1992	.	12.1652	199.271	195.004	890
chr10	38383087	38384365	Peak_597	1991	.	11.6192	199.183	194.916	343
chr17	62961750	62962494	Peak_598	1991	.	13.7563	199.16	194.894	403
chr10	5854516	5856340	Peak_599	1988	.	12.1755	198.865	194.6	1210
chr4	22516997	22518219	Peak_600	1986	.	18.2125	198.65	194.385	458
chr6	26596986	26597720	Peak_601	1984	.	9.96263	198.482	194.219	311
chr1	176175493	176176578	Peak_602	1983	.	14.3004	198.31	194.047	363
chr11	74459781	74460894	Peak_603	1982	.	13.6486	198.284	194.021	469
chr10	5930661	5932065	Peak_604	1977	.	12.1547	197.76	193.499	1027
chr14	90797678	90798464	Peak_605	1977	.	11.5269	197.742	193.481	386
chr9	134614609	134615365	Peak_606	1976	.	13.1257	197.624	193.364	389
chr1	94311622	94313927	Peak_607	1967	.	17.4177	196.747	192.49	1229
chr10	93683329	93684041	Peak_608	1965	.	9.71875	196.529	192.273	373
chr12	42631125	42632773	Peak_609	1964	.	15.1989	196.457	192.202	405
chr12	132434352	132435326	Peak_610	1960	.	14.6427	196.013	191.759	358
chr7	94138817	94140187	Peak_611	1959	.	10.2868	195.983	191.729	774
chr1	229693597	229695260	Peak_612	1958	.	12.865	195.89	191.637	633
chr8	119123835	119124742	Peak_613	1951	.	15.9353	195.171	190.92	491
chr5	179222307	179223746	Peak_614	1948	.	12.7197	194.811	190.562	639
chr22	39714914	39715861	Peak_615	1946	.	10.6679	194.671	190.423	491
chr21	9967826	9968797	Peak_616	1946	.	9.48921	194.663	190.415	670
chr7	158648873	158649958	Peak_617	1944	.	9.81306	194.446	190.199	685
chr22	36901989	36903672	Peak_618	1944	.	11.2932	194.425	190.178	431
chr9	71650484	71651401	Peak_619	1940	.	13.5938	194.09	189.844	359
chr6	158243613	158245410	Peak_620	1938	.	17.6228	193.865	189.62	792
chr5	41904302	41904945	Peak_621	1938	.	9.31382	193.859	189.614	300
chr16	50402101	50403012	Peak_622	1937	.	19.7527	193.736	189.492	623
chr3	13460660	13462321	Peak_623	1936	.	14.4738	193.634	189.39	853
chr19	36908833	36909903	Peak_624	1936	.	10.6167	193.628	189.384	600
chr11	105948338	105949206	Peak_625	1936	.	13.0848	193.602	189.358	396
chr8	7212284	7213002	Peak_626	1935	.	6.76416	193.506	189.262	375
chr7	99933126	99934297	Peak_627	1934	.	9.78315	193.44	189.196	786
chr11	68079618	68082494	Peak_628	1934	.	12.3718	193.426	189.183	1145
chr7	105028258	105030003	Peak_629	1934	.	14.3681	193.422	189.179	858
chr7	72349787	72350809	Peak_630	1934	.	10.4305	193.41	189.167	356
chr17	8339146	8339997	Peak_631	1933	.	9.97522	193.399	189.156	317
chr2	54342361	54343063	Peak_632	1933	.	13.4792	193.369	189.127	317
chr8	55013809	55014576	Peak_633	1933	.	13.4792	193.369	189.127	379
chr6	3259056	3260161	Peak_634	1928	.	13.1703	192.85	188.609	356
chr7	6769022	6770278	Peak_635	1927	.	10.1295	192.794	188.554	662
chr5	179159754	179160975	Peak_636	1927	.	11.3696	192.712	188.472	362
chr7	75156454	75157611	Peak_637	1926	.	9.41883	192.686	188.445	789
chr5	37248885	37249803	Peak_638	1925	.	12.6285	192.562	188.322	334
chr7	99214189	99215044	Peak_639	1925	.	7.80368	192.54	188.3	517
chr1	1708987	1710014	Peak_640	1923	.	12.4693	192.374	188.135	615
chr22	17517392	17519079	Peak_641	1923	.	11.3354	192.36	188.122	926
chr5	173042968	173044100	Peak_642	1922	.	11.9258	192.259	188.021	566
chr10	1101875	1103001	Peak_643	1920	.	11.4887	192.088	187.851	541
chr14	57856672	57858497	Peak_644	1920	.	11.5083	192.088	187.851	1082
chr3	193858901	193860173	Peak_645	1920	.	11.5083	192.088	187.851	807
chr3	129611784	129612521	Peak_646	1918	.	11.0545	191.893	187.656	396
chr10	43277678	43278347	Peak_647	1918	.	12.272	191.8	187.564	340
chr14	53173556	53174456	Peak_648	1915	.	8.07226	191.568	187.333	568
chr17	21116734	21118417	Peak_649	1914	.	11.6534	191.484	187.248	461
chr15	41708664	41710218	Peak_650	1913	.	9.91346	191.374	187.14	934
chr15	67813002	67814435	Peak_651	1913	.	10.1163	191.37	187.136	725
chr15	48623086	48624070	Peak_652	1911	.	12.9967	191.19	186.956	710
chr16	70557614	70558298	Peak_653	1910	.	14.2291	191.059	186.826	312
chr16	30545210	30546441	Peak_654	1910	.	10.6919	191.026	186.793	550
chr1	6258969	6259861	Peak_655	1909	.	9.21809	190.921	186.689	494
chr3	39447985	39448861	Peak_656	1906	.	12.2068	190.693	186.461	470
chrX	57935958	57937019	Peak_657	1906	.	21.2828	190.629	186.397	604
chr7	141250520	141251718	Peak_658	1906	.	12.0474	190.618	186.387	873
chr14	67826884	67827666	Peak_659	1904	.	9.70837	190.431	186.201	360
chr15	65476602	65477928	Peak_660	1904	.	12.3078	190.401	186.171	884
chr22	46731118	46732481	Peak_661	1903	.	11.9648	190.339	186.11	543
chr2	216176623	216177600	Peak_662	1902	.	15.6757	190.25	186.021	400
chr13	115079525	115080512	Peak_663	1900	.	14.3048	190.079	185.85	616
chr22	31795052	31796346	Peak_664	1898	.	12.0889	189.802	185.575	748
chr22	29999085	30000405	Peak_666	1896	.	10.7085	189.642	185.415	793
chr5	64063699	64064727	Peak_667	1894	.	9.6635	189.431	185.205	638
chr7	139762180	139763258	Peak_668	1891	.	10.2329	189.162	184.937	454
chr10	15138970	15140002	Peak_669	1890	.	11.1053	189.094	184.869	383
chr20	2083123	2084326	Peak_670	1889	.	11.8217	188.978	184.754	463
chr16	25268517	25270008	Peak_671	1889	.	12.8531	188.922	184.698	468
chr16	30913278	30914112	Peak_672	1886	.	14.75	188.602	184.38	441
chr11	6624303	6625075	Peak_673	1885	.	10.6908	188.595	184.373	383
chr10	105726444	105727716	Peak_674	1885	.	15.4144	188.551	184.329	759
chr10	105109965	105111207	Peak_675	1884	.	12.1197	188.482	184.26	445
chr10	112063884	112064772	Peak_676	1884	.	10.4286	188.435	184.214	538
chr8	118532808	118533589	Peak_677	1884	.	10.4457	188.435	184.214	342
chr11	125495223	125495882	Peak_678	1882	.	10.7149	188.207	183.987	312
chr11	33278530	33280524	Peak_679	1880	.	11.1823	188.083	183.863	591
chrX	53253630	53254648	Peak_680	1879	.	17.7524	187.941	183.722	630
chr19	47615194	47616452	Peak_681	1872	.	18.3126	187.223	183.008	819
chr4	24913277	24915008	Peak_682	1868	.	14.2058	186.844	182.63	1162
chr13	113862215	113863571	Peak_683	1868	.	14.6904	186.831	182.617	972
chr12	49452922	49454962	Peak_684	1865	.	11.2246	186.5	182.288	1203
chr17	78427853	78429298	Peak_685	1863	.	10.2625	186.325	182.114	513
chr1	156697913	156698712	Peak_686	1860	.	11.4324	186.078	181.868	515
chr6	170893115	170893918	Peak_687	1854	.	12.3338	185.464	181.256	431
chr3	49977388	49978135	Peak_688	1852	.	10.6636	185.23	181.023	327
chr8	99305796	99306861	Peak_689	1848	.	12.1086	184.865	180.66	564
chr17	36981115	36982169	Peak_690	1846	.	10.3781	184.648	180.444	665
chr17	4045694	4046529	Peak_691	1845	.	10.7603	184.508	180.304	395
chr7	92076470	92077465	Peak_692	1843	.	10.2438	184.393	180.19	433
chr13	96328615	96330126	Peak_693	1841	.	13.5367	184.113	179.912	1011
chr20	25604095	25605438	Peak_694	1840	.	12.1525	184.052	179.851	987
chr10	88280657	88282286	Peak_695	1839	.	18.7097	183.977	179.776	1270
chr16	576648	579164	Peak_696	1838	.	11.01	183.83	179.629	485
chr3	57261706	57262634	Peak_697	1836	.	10.8008	183.626	179.427	407
chr20	34638077	34639035	Peak_698	1835	.	11.1941	183.503	179.304	575
chr9	139333519	139334575	Peak_699	1833	.	11.497	183.303	179.105	543
chr9	127623421	127624624	Peak_700	1832	.	12.2202	183.244	179.046	551
chr3	128205511	128209776	Peak_701	1831	.	8.97194	183.147	178.95	2890
chr8	64080394	64081757	Peak_702	1830	.	13.967	183.016	178.819	354
chr9	125666872	125667824	Peak_703	1826	.	11.2226	182.642	178.446	554
chr1	241682209	241683206	Peak_704	1825	.	10.697	182.521	178.326	558
chr9	140472728	140473771	Peak_705	1824	.	11.5512	182.458	178.263	494
chr2	64245689	64247105	Peak_706	1824	.	20.613	182.406	178.212	495
chr11	10562189	10563040	Peak_707	1823	.	10.4603	182.351	178.157	426
chr4	140222667	140223715	Peak_708	1823	.	10.4781	182.351	178.157	481
chr7	72992079	72993036	Peak_709	1822	.	9.82911	182.249	178.056	560
chr16	31519305	31520252	Peak_710	1819	.	12.9502	181.916	177.724	635
chr3	141205457	141206893	Peak_711	1818	.	11.8587	181.89	177.698	647
chr10	76970318	76971333	Peak_712	1818	.	12.0628	181.844	177.653	470
chr1	1509499	1510888	Peak_713	1817	.	11.2717	181.783	177.591	645
chr4	124084	125224	Peak_714	1817	.	14.8619	181.731	177.54	437
chr22	44419478	44420957	Peak_715	1817	.	10.9526	181.713	177.522	371
chr1	117452463	117453544	Peak_716	1815	.	12.6601	181.51	177.32	566
chr11	30344455	30345384	Peak_717	1814	.	12.1727	181.413	177.223	406
chr6	116892001	116893176	Peak_718	1814	.	12.1499	181.413	177.223	728
chr15	40674855	40675776	Peak_719	1813	.	10.4249	181.315	177.126	522
chr2	98611516	98612739	Peak_720	1812	.	15.0315	181.274	177.085	587
chr20	39764889	39766996	Peak_721	1810	.	12.2114	181.047	176.859	946
chr2	101869218	101870194	Peak_722	1807	.	14.1569	180.772	176.586	332
chr10	43633159	43634319	Peak_723	1806	.	10.7671	180.644	176.458	476
chr10	51564937	51565929	Peak_724	1805	.	8.7759	180.581	176.395	551
chr3	118958931	118959787	Peak_725	1805	.	10.2571	180.53	176.344	586
chr7	55433158	55434581	Peak_726	1802	.	10.1551	180.204	176.02	780
chr6	138427928	138428819	Peak_727	1801	.	16.1063	180.118	175.934	448
chr21	34142995	34144180	Peak_728	1800	.	14.2797	180.099	175.916	882
chr6	170615129	170616483	Peak_729	1796	.	14.3613	179.688	175.506	787
chr1	11118839	11120649	Peak_730	1796	.	11.9507	179.643	175.462	1068
chr13	42534537	42535758	Peak_731	1796	.	10.8568	179.602	175.421	750
chr19	8069567	8071054	Peak_732	1795	.	13.5043	179.587	175.406	718
chr13	21714573	21715265	Peak_733	1795	.	6.85811	179.511	175.331	318
chr14	78226871	78227664	Peak_734	1795	.	9.3494	179.507	175.326	427
chr20	45317410	45318141	Peak_735	1791	.	12.1517	179.115	174.936	397
chr7	5820299	5821464	Peak_736	1791	.	12.1287	179.115	174.936	542
chr9	100744846	100747826	Peak_737	1789	.	12.4379	178.933	174.754	1439
chr18	11908037	11909262	Peak_738	1789	.	14.25	178.917	174.739	628
chr14	23834017	23835286	Peak_739	1789	.	13.4859	178.908	174.729	469
chr2	152266352	152267235	Peak_740	1789	.	13.5406	178.908	174.729	383
chr7	138145003	138146092	Peak_741	1788	.	11.6356	178.852	174.674	348
chr1	179198039	179198885	Peak_742	1787	.	17.0403	178.773	174.596	543
chr15	102191876	102193722	Peak_743	1782	.	11.8209	178.275	174.1	506
chr17	65362064	65362802	Peak_744	1782	.	9.68552	178.234	174.059	419
chr10	123686934	123688333	Peak_745	1781	.	11.3847	178.144	173.969	998
chr6	146135196	146136395	Peak_746	1780	.	12.8331	178.061	173.887	480
chr14	77786646	77787736	Peak_747	1779	.	10.4115	177.953	173.779	354
chr6	2764938	2766964	Peak_748	1777	.	11.0699	177.775	173.601	970
chr2	20549816	20550593	Peak_749	1775	.	14.4766	177.589	173.417	404
chr8	145114711	145116214	Peak_750	1773	.	12.2523	177.36	173.189	671
chr12	49245437	49246137	Peak_751	1771	.	10.2653	177.189	173.019	357
chr7	102715230	102716249	Peak_752	1771	.	10.0697	177.142	172.972	490
chr17	4692840	4693895	Peak_753	1770	.	11.3223	177.069	172.9	671
chr19	1467105	1470807	Peak_754	1765	.	9.27462	176.558	172.39	1171
chr13	111357924	111358706	Peak_755	1764	.	11.5976	176.442	172.275	407
chr2	43036851	43037755	Peak_756	1762	.	15.1138	176.263	172.096	586
chr6	4018329	4019140	Peak_757	1762	.	9.60575	176.235	172.069	457
chr3	45634665	45637167	Peak_758	1761	.	12.8942	176.162	171.996	1205
chr14	45603027	45603768	Peak_759	1761	.	10.2476	176.161	171.995	354
chr14	35008420	35009066	Peak_760	1760	.	8.94021	176.098	171.932	340
chr14	75348219	75349265	Peak_761	1760	.	8.91205	176.098	171.932	614
chr9	131266832	131267790	Peak_762	1759	.	11.3015	175.997	171.832	382
chr1	27216028	27216964	Peak_763	1758	.	9.72893	175.871	171.707	517
chr2	233561676	233562911	Peak_764	1757	.	12.757	175.8	171.636	573
chr17	17584429	17586536	Peak_765	1757	.	12.6351	175.744	171.58	484
chr1	35733976	35734874	Peak_766	1754	.	12.5988	175.451	171.287	580
chr5	178322569	178323487	Peak_767	1753	.	9.98493	175.312	171.149	478
chr16	1524539	1525673	Peak_768	1749	.	11.2182	174.926	170.765	749
chr3	194979427	194980908	Peak_769	1748	.	8.58977	174.876	170.716	850
chr1	247094141	247095301	Peak_770	1747	.	13.4233	174.715	170.556	355
chr3	125092955	125094729	Peak_771	1743	.	10.015	174.398	170.239	966
chr8	37593839	37594847	Peak_772	1740	.	9.93291	174.094	169.938	456
chr16	278772	279604	Peak_773	1739	.	12.4205	173.995	169.839	525
chr3	128597447	128598501	Peak_774	1738	.	9.66364	173.867	169.711	786
chr13	31773775	31775142	Peak_775	1734	.	7.6154	173.466	169.312	1048
chr6	64345650	64346809	Peak_776	1732	.	12.4989	173.206	169.053	702
chr7	48018572	48019374	Peak_777	1731	.	11.4671	173.194	169.041	497
chr17	4046856	4047539	Peak_778	1731	.	10.3656	173.161	169.009	317
chr20	52824480	52825460	Peak_779	1728	.	9.631	172.867	168.716	356
chr8	97273339	97274891	Peak_780	1724	.	10.8705	172.483	168.333	334
chr19	32836395	32837300	Peak_781	1721	.	11.4236	172.114	167.967	379
chr13	31038133	31039295	Peak_782	1720	.	9.88163	172.07	167.923	456
chr7	29724186	29725444	Peak_783	1720	.	9.88163	172.07	167.923	680
chr2	97522990	97524196	Peak_784	1716	.	10.1266	171.663	167.517	608
chr1	24306189	24306957	Peak_785	1713	.	16.7154	171.371	167.227	453
chr7	44620898	44622003	Peak_786	1713	.	9.9285	171.353	167.209	751
chr5	149737061	149737968	Peak_787	1712	.	12.5288	171.298	167.154	469
chr4	73934734	73935748	Peak_788	1712	.	12.8893	171.23	167.087	420
chr3	49966889	49967730	Peak_789	1711	.	10.8499	171.158	167.014	334
chr12	6861746	6862703	Peak_790	1711	.	10.3361	171.123	166.98	394
chr3	49448702	49449476	Peak_791	1709	.	14.2989	170.994	166.851	441
chr16	30816499	30817561	Peak_792	1706	.	11.0518	170.658	166.517	487
chr10	121410925	121412069	Peak_793	1706	.	12.4212	170.638	166.497	772
chr19	33864036	33865626	Peak_794	1705	.	13.387	170.526	166.385	806
chr9	114393043	114394412	Peak_795	1703	.	10.7707	170.377	166.237	859
chr14	69658015	69658974	Peak_796	1703	.	10.4668	170.363	166.223	569
chr13	27131711	27132774	Peak_797	1703	.	8.82965	170.349	166.209	349
chr4	6783914	6785706	Peak_798	1702	.	14.717	170.238	166.099	786
chr10	71992122	71993467	Peak_799	1701	.	9.6069	170.136	165.998	822
chr17	66097609	66098750	Peak_800	1700	.	9.79616	170.052	165.914	413
chr3	197281872	197283221	Peak_801	1700	.	8.89204	170.015	165.877	911
chr7	45150534	45151845	Peak_802	1700	.	8.90655	170.015	165.877	666
chr14	74353105	74354280	Peak_803	1697	.	9.03531	169.728	165.592	663
chr3	10289941	10291031	Peak_804	1695	.	12.3708	169.52	165.385	319
chr15	65066960	65067690	Peak_805	1695	.	13.8213	169.504	165.369	291
chr9	77642482	77643485	Peak_806	1694	.	11.8248	169.495	165.36	629
chr20	3800441	3801425	Peak_807	1694	.	10.9212	169.407	165.272	412
chr7	112429811	112430827	Peak_808	1692	.	10.8343	169.226	165.092	503
chr10	85899057	85899865	Peak_809	1690	.	10.2184	169.043	164.91	416
chr14	31925994	31926874	Peak_810	1690	.	10.1999	169.043	164.91	481
chr9	117373208	117374659	Peak_811	1689	.	12.7568	168.964	164.832	760
chr9	111881250	111882325	Peak_812	1688	.	11.293	168.887	164.754	724
chr11	118660872	118662817	Peak_813	1687	.	9.02035	168.759	164.627	1464
chr4	1873129	1874155	Peak_814	1685	.	14.8623	168.587	164.456	282
chr1	149982004	149982952	Peak_815	1684	.	8.68682	168.433	164.303	467
chr14	104387135	104388004	Peak_816	1683	.	9.33453	168.3	164.17	533
chr2	75937466	75938457	Peak_817	1683	.	9.35049	168.3	164.17	371
chr11	8703515	8704931	Peak_818	1682	.	9.76231	168.238	164.109	1004
chr15	29561348	29562132	Peak_819	1681	.	9.70111	168.159	164.03	418
chr4	2538368	2539529	Peak_820	1680	.	14.6457	168.017	163.889	646
chr21	33103221	33105830	Peak_821	1679	.	14.3057	167.958	163.83	919
chr6	28109434	28110127	Peak_822	1677	.	8.97548	167.791	163.663	354
chr6	74229864	74230927	Peak_823	1671	.	11.5573	167.174	163.049	644
chr5	16465118	16466644	Peak_824	1669	.	10.1263	166.994	162.87	1125
chr2	230932328	230933780	Peak_825	1669	.	12.6858	166.975	162.852	841
chr5	1344456	1345888	Peak_826	1666	.	10.5069	166.643	162.521	948
chr5	138088508	138089966	Peak_827	1665	.	11.4127	166.58	162.458	897
chr3	141456779	141457952	Peak_828	1665	.	9.12606	166.555	162.434	601
chr8	23145378	23146333	Peak_829	1664	.	10.8853	166.418	162.297	335
chr16	71756923	71758303	Peak_830	1660	.	13.5376	166.04	161.921	631
chr20	13765505	13766463	Peak_831	1660	.	13.5673	166.04	161.921	565
chr6	146055860	146057053	Peak_832	1659	.	13.1046	165.931	161.813	399
chr16	89556315	89557181	Peak_833	1657	.	15.5481	165.727	161.609	448
chr7	150945276	150946760	Peak_834	1655	.	9.07974	165.582	161.465	964
chr15	57210301	57212089	Peak_835	1653	.	10.8645	165.363	161.246	1147
chr7	75543572	75544908	Peak_836	1651	.	9.58241	165.16	161.044	457
chr19	34662785	34664220	Peak_837	1646	.	8.04951	164.604	160.492	364
chr2	29117399	29118430	Peak_838	1644	.	10.8906	164.487	160.375	462
chr20	61273129	61274933	Peak_839	1643	.	10.2422	164.4	160.288	991
chr10	13389019	13390666	Peak_840	1643	.	11.5993	164.313	160.201	351
chr6	38670193	38671076	Peak_841	1643	.	10.802	164.309	160.197	552
chr22	31364328	31366208	Peak_842	1642	.	8.718	164.266	160.155	1214
chr12	120638377	120639181	Peak_843	1642	.	14.3864	164.263	160.152	361
chr9	140316949	140318494	Peak_844	1640	.	9.44915	164.042	159.932	490
chr11	449744	450914	Peak_845	1635	.	9.82357	163.543	159.435	744
chr5	1111193	1112309	Peak_846	1635	.	11.0755	163.542	159.434	776
chr17	37356368	37357402	Peak_847	1633	.	10.312	163.394	159.287	446
chr9	74978796	74980332	Peak_848	1631	.	11.179	163.141	159.035	550
chr11	32604862	32605987	Peak_849	1630	.	9.53976	163.04	158.934	674
chr10	99205800	99206407	Peak_850	1626	.	8.9871	162.671	158.568	306
chr11	75140391	75141944	Peak_851	1626	.	10.448	162.633	158.529	523
chr4	4543115	4544334	Peak_852	1622	.	13.9786	162.212	158.11	552
chr6	43138946	43140041	Peak_853	1621	.	10.1439	162.119	158.018	293
chr20	47894406	47895953	Peak_854	1620	.	9.50557	162.045	157.944	559
chr17	62914966	62916016	Peak_855	1618	.	10.5498	161.887	157.787	416
chr21	40720143	40721070	Peak_856	1617	.	14.9612	161.735	157.636	616
chr9	139760443	139761508	Peak_857	1616	.	11.6714	161.688	157.589	651
chr11	65429945	65431390	Peak_858	1616	.	9.79915	161.613	157.515	882
chr7	149320942	149322334	Peak_859	1616	.	9.79915	161.613	157.515	625
chr1	6295309	6296110	Peak_860	1614	.	9.68869	161.45	157.352	501
chr20	32951052	32951943	Peak_861	1612	.	9.50545	161.243	157.145	443
chr14	35872807	35874678	Peak_862	1611	.	10.6564	161.157	157.061	1017
chr19	58739902	58740995	Peak_863	1609	.	10.5922	160.998	156.902	489
chr11	64875225	64876506	Peak_864	1609	.	9.23929	160.991	156.895	860
chr19	10362494	10363590	Peak_865	1609	.	7.93616	160.948	156.852	418
chr17	49337860	49338543	Peak_866	1609	.	9.13328	160.921	156.826	292
chr3	52719346	52720686	Peak_867	1608	.	9.90542	160.886	156.791	879
chr10	3214181	3215082	Peak_868	1607	.	12.2258	160.774	156.68	504
chr1	228674208	228675863	Peak_869	1607	.	12.0666	160.732	156.638	1096
chr8	133787423	133788308	Peak_870	1607	.	11.2838	160.704	156.61	397
chr7	74071361	74072916	Peak_871	1606	.	10.6264	160.674	156.58	927
chr1	33814393	33815510	Peak_872	1604	.	13.7045	160.417	156.324	720
chr12	104359526	104360358	Peak_873	1603	.	10.945	160.357	156.264	369
chr4	120987234	120988080	Peak_874	1601	.	13.9884	160.199	156.107	496
chr8	104310712	104311811	Peak_875	1601	.	10.6356	160.11	156.019	734
chr11	118964661	118966320	Peak_876	1600	.	9.45429	160.059	155.968	1223
chr3	141867701	141868598	Peak_877	1600	.	9.24438	160.051	155.959	377
chr11	3012680	3013676	Peak_878	1599	.	10.5305	159.955	155.864	564
chr8	53626104	53627773	Peak_879	1599	.	9.66263	159.936	155.846	1208
chr20	18118140	18119324	Peak_880	1598	.	10.091	159.877	155.787	585
chr17	16118075	16119591	Peak_881	1598	.	8.88619	159.864	155.774	1012
chr12	861678	862858	Peak_882	1597	.	11.3584	159.72	155.631	563
chr15	43425582	43426470	Peak_883	1593	.	9.55651	159.38	155.292	371
chr1	101490672	101491982	Peak_884	1593	.	12.0708	159.361	155.273	650
chr22	46525135	46526050	Peak_885	1592	.	9.2108	159.255	155.168	425
chr17	1587508	1588652	Peak_886	1591	.	8.70625	159.145	155.058	494
chr5	131745950	131747462	Peak_887	1591	.	11.5274	159.111	155.025	499
chr13	49106462	49107518	Peak_888	1590	.	11.971	159.072	154.985	604
chr7	6143718	6145398	Peak_889	1590	.	9.4201	159.068	154.982	416
chr1	156561387	156562191	Peak_890	1588	.	11.4181	158.872	154.787	444
chr17	26219776	26220512	Peak_891	1588	.	10.0719	158.856	154.771	334
chr1	115052869	115053918	Peak_892	1585	.	12.1474	158.553	154.469	527
chr1	43832400	43834380	Peak_893	1585	.	10.7938	158.513	154.43	1606
chr1	231556880	231558621	Peak_894	1581	.	10.6168	158.178	154.096	663
chr10	99093289	99094559	Peak_895	1578	.	10.2523	157.889	153.809	523
chr2	131100360	131100981	Peak_896	1578	.	10.2722	157.889	153.809	325
chr14	24664303	24665469	Peak_897	1576	.	10.842	157.636	153.557	790
chr19	36207141	36209985	Peak_898	1576	.	10.8638	157.636	153.557	2006
chr19	41222817	41223634	Peak_899	1576	.	10.842	157.636	153.557	341
chr20	277816	279324	Peak_900	1575	.	14.5546	157.548	153.47	614
chr1	11159299	11160379	Peak_901	1572	.	8.63147	157.241	153.164	400
chr15	48469832	48470848	Peak_902	1572	.	10.0984	157.233	153.155	461
chr11	66112074	66113111	Peak_903	1571	.	11.9421	157.153	153.076	675
chr14	73524898	73526097	Peak_904	1570	.	9.33463	157.093	153.016	387
chr5	10353162	10354686	Peak_905	1570	.	9.33463	157.093	153.016	350
chr7	102004224	102005055	Peak_906	1569	.	8.61129	156.984	152.907	345
chr14	105632083	105634623	Peak_907	1568	.	10.2323	156.86	152.785	1645
chr20	57267177	57269004	Peak_908	1568	.	11.4412	156.826	152.751	401
chr2	32502744	32503597	Peak_909	1568	.	9.97617	156.818	152.743	365
chr11	1330258	1331758	Peak_910	1566	.	10.3262	156.697	152.623	1013
chr1	247494385	247495955	Peak_911	1565	.	10.7982	156.581	152.507	943
chr14	56046293	56048059	Peak_912	1565	.	14.2591	156.538	152.464	1092
chr8	131455018	131456512	Peak_913	1562	.	11.7411	156.253	152.18	797
chr17	79366734	79368011	Peak_914	1561	.	8.30674	156.18	152.108	899
chr15	65321309	65322039	Peak_915	1559	.	9.48537	155.945	151.874	408
chr5	1633460	1634621	Peak_916	1558	.	9.95703	155.802	151.732	706
chr9	126691405	126692632	Peak_917	1555	.	12.1204	155.529	151.46	767
chr2	131850315	131851409	Peak_918	1554	.	12.5874	155.441	151.372	504
chr8	145751969	145753923	Peak_919	1554	.	11.1952	155.424	151.355	945
chr1	146714159	146714994	Peak_920	1553	.	9.07877	155.347	151.279	454
chr1	32573499	32574533	Peak_921	1553	.	9.07877	155.347	151.279	410
chr10	89577284	89578113	Peak_922	1551	.	13.5638	155.198	151.131	454
chr9	127702756	127703942	Peak_923	1548	.	10.1525	154.807	150.741	370
chr11	77348370	77349020	Peak_924	1548	.	8.41342	154.806	150.74	330
chr1	33895691	33896635	Peak_925	1544	.	12.0673	154.422	150.359	590
chr6	160147534	160149276	Peak_926	1543	.	12.4748	154.316	150.253	1281
chr15	72667859	72668779	Peak_927	1542	.	9.09986	154.22	150.157	361
chr11	62572283	62573092	Peak_928	1539	.	9.43219	153.96	149.899	420
chr5	32312220	32313146	Peak_929	1539	.	10.9484	153.958	149.897	526
chr14	103523078	103523926	Peak_930	1538	.	12.184	153.897	149.836	435
chr1	213188320	213189310	Peak_931	1538	.	10.3858	153.867	149.806	289
chr17	28705888	28707024	Peak_932	1538	.	10.3858	153.867	149.806	322
chr17	17494144	17495686	Peak_933	1537	.	10.0927	153.782	149.722	784
chr3	196044450	196045528	Peak_934	1537	.	7.72204	153.704	149.644	600
chr4	699530	700183	Peak_935	1534	.	11.1817	153.495	149.436	315
chr14	105281628	105283253	Peak_936	1534	.	9.01275	153.403	149.344	534
chr6	168461213	168462593	Peak_937	1533	.	11.9878	153.318	149.26	743
chr15	91498118	91498904	Peak_938	1532	.	8.94551	153.202	149.144	285
chr16	47006785	47008113	Peak_939	1531	.	9.18079	153.161	149.103	658
chr22	42016378	42017992	Peak_940	1531	.	9.18079	153.161	149.103	1121
chr8	145549943	145551382	Peak_941	1531	.	9.90424	153.16	149.103	806
chr2	128051035	128051881	Peak_942	1530	.	11.4349	153.093	149.037	510
chr15	29130725	29132110	Peak_943	1528	.	11.4026	152.83	148.775	622
chr19	59055628	59056618	Peak_944	1528	.	12.1731	152.81	148.755	327
chr19	12911664	12912928	Peak_945	1527	.	8.80805	152.731	148.676	799
chr11	70116074	70117542	Peak_946	1526	.	11.2638	152.638	148.583	888
chr3	5229249	5230371	Peak_947	1524	.	11.9945	152.467	148.414	410
chr1	6760881	6762327	Peak_948	1523	.	10.031	152.349	148.296	843
chr20	35490389	35492600	Peak_949	1523	.	11.2851	152.34	148.287	1351
chr16	89574023	89575463	Peak_950	1522	.	11.0319	152.221	148.169	985
chr5	175788019	175788930	Peak_951	1521	.	9.14661	152.182	148.13	568
chr22	20103086	20105898	Peak_952	1520	.	10.8632	152.089	148.037	2203
chr13	21750138	21751493	Peak_953	1519	.	7.89446	151.949	147.898	987
chr14	102552568	102554211	Peak_954	1518	.	9.62984	151.811	147.76	525
chr19	17622030	17623153	Peak_955	1517	.	10.0329	151.74	147.69	596
chrX	107069136	107070432	Peak_956	1516	.	18.1915	151.665	147.616	767
chr15	49170147	49170871	Peak_957	1515	.	8.15189	151.536	147.487	387
chr2	109150240	109151538	Peak_958	1509	.	14.5828	150.925	146.879	927
chr15	49447040	49447852	Peak_959	1504	.	7.7367	150.414	146.37	502
chr3	75834097	75834843	Peak_960	1503	.	11.1301	150.379	146.336	437
chr7	39662439	39663796	Peak_961	1503	.	9.93167	150.314	146.271	547
chr10	64563793	64565805	Peak_962	1502	.	10.5141	150.292	146.249	904
chr12	104530964	104532016	Peak_963	1502	.	15.2796	150.259	146.216	761
chr19	4968954	4969773	Peak_964	1501	.	10.5009	150.172	146.13	371
chr16	85832470	85833988	Peak_965	1500	.	10.8052	150.067	146.026	451
chr19	14228961	14229646	Peak_966	1498	.	10.4663	149.858	145.817	291
chr7	856050	857127	Peak_967	1498	.	12.2777	149.839	145.799	362
chr1	23670015	23670844	Peak_968	1498	.	17.1868	149.804	145.763	417
chr4	187112409	187113387	Peak_969	1496	.	12.5518	149.647	145.608	341
chr22	31742710	31743786	Peak_970	1495	.	9.30662	149.588	145.549	637
chr12	132194845	132196178	Peak_971	1495	.	10.0417	149.507	145.468	908
chr7	100032976	100034106	Peak_972	1494	.	9.13296	149.469	145.43	542
chr2	48009846	48010911	Peak_973	1494	.	13.2447	149.412	145.374	652
chr10	70748394	70749268	Peak_974	1493	.	8.96935	149.389	145.351	359
chr11	110300491	110301677	Peak_975	1492	.	9.06114	149.256	145.218	577
chr13	91999886	92001485	Peak_976	1490	.	17.9339	149.054	145.017	960
chr20	18547704	18548532	Peak_977	1490	.	15.2397	149.037	145.001	493
chr13	111566277	111567482	Peak_978	1490	.	10.7596	149.014	144.978	422
chr5	81267535	81268554	Peak_979	1489	.	11.7491	148.918	144.882	441
chr10	71905180	71906558	Peak_980	1489	.	8.69637	148.903	144.867	680
chr19	1591904	1592856	Peak_981	1488	.	10.6468	148.879	144.843	567
chr1	179050559	179052085	Peak_982	1488	.	9.4452	148.853	144.817	734
chr15	91445471	91446775	Peak_983	1488	.	10.2377	148.837	144.801	346
chr6	35463776	35464754	Peak_984	1486	.	9.89328	148.689	144.655	454
chr17	1012250	1013141	Peak_985	1486	.	11.804	148.643	144.609	432
chr3	14165582	14167229	Peak_986	1486	.	11.4136	148.642	144.607	561
chr7	150784050	150785406	Peak_987	1485	.	8.23532	148.6	144.566	641
chr3	120315132	120315724	Peak_988	1485	.	7.2504	148.556	144.522	253
chr14	64193899	64195076	Peak_989	1483	.	10.515	148.359	144.326	518
chr3	183872730	183873869	Peak_990	1482	.	9.85223	148.286	144.253	653
chr9	127177054	127177858	Peak_991	1480	.	9.21947	148.046	144.014	516
chr1	1282987	1284506	Peak_992	1480	.	7.77878	148.028	143.997	536
chr3	132440459	132441344	Peak_993	1479	.	8.66446	147.95	143.919	528
chr19	1847850	1848706	Peak_994	1478	.	9.40839	147.861	143.831	474
chr3	196466614	196467615	Peak_995	1475	.	9.11981	147.549	143.521	436
chr16	89160002	89160879	Peak_996	1474	.	11.0809	147.497	143.469	433
chr2	234474702	234475539	Peak_997	1474	.	10.5608	147.47	143.442	538
chr1	150946238	150947569	Peak_998	1473	.	10.5472	147.35	143.323	752
chr14	104028130	104030206	Peak_999	1471	.	9.67124	147.105	143.078	619
chr4	2469984	2471985	Peak_1000	1470	.	9.14856	147.066	143.04	1562
chr13	21140750	21141834	Peak_1001	1469	.	8.60065	146.999	142.973	733
chr8	124252992	124253825	Peak_1002	1469	.	8.6166	146.999	142.973	460
chr2	148777707	148778384	Peak_1003	1469	.	11.702	146.977	142.951	372
chr7	123387525	123389904	Peak_1004	1468	.	8.30242	146.881	142.856	945
chr3	39424800	39426000	Peak_1005	1467	.	9.59327	146.736	142.712	446
chr7	156930907	156932650	Peak_1006	1467	.	9.57413	146.736	142.712	310
chr11	120894594	120895607	Peak_1007	1466	.	9.81351	146.665	142.641	368
chr6	13614580	13616154	Peak_1008	1466	.	9.81351	146.665	142.641	523
chr4	17811680	17813297	Peak_1009	1466	.	13.3944	146.657	142.634	409
chr14	24898631	24899661	Peak_1010	1463	.	8.94148	146.345	142.323	642
chr7	65338160	65339181	Peak_1011	1461	.	12.5366	146.159	142.138	387
chr8	21905896	21906932	Peak_1012	1458	.	10.7288	145.868	141.849	578
chr9	131789675	131790633	Peak_1013	1458	.	10.6001	145.866	141.847	630
chr10	62492653	62493562	Peak_1014	1457	.	9.24647	145.742	141.724	591
chr11	66313095	66313766	Peak_1015	1457	.	9.24647	145.742	141.724	346
chr15	65578308	65579452	Peak_1016	1457	.	9.55498	145.737	141.719	469
chr5	74807585	74808194	Peak_1017	1456	.	9.77363	145.655	141.637	297
chr15	78729844	78731259	Peak_1018	1456	.	10.0321	145.643	141.625	999
chr1	33721121	33722831	Peak_1019	1455	.	11.1146	145.567	141.549	380
chr12	6450012	6451432	Peak_1020	1455	.	8.94035	145.557	141.54	827
chr22	30752435	30753274	Peak_1021	1455	.	8.4004	145.507	141.49	307
chr1	44820079	44821090	Peak_1022	1455	.	8.10884	145.501	141.484	737
chr3	49058401	49060665	Peak_1023	1453	.	9.78515	145.345	141.328	402
chr18	74533652	74535406	Peak_1024	1450	.	13.9235	145.016	141.001	354
chr21	45284082	45285990	Peak_1025	1449	.	12.9835	144.99	140.976	1396
chr13	22032682	22033471	Peak_1026	1449	.	6.4047	144.947	140.932	446
chr3	126422645	126423876	Peak_1027	1448	.	8.10439	144.898	140.884	585
chr9	72873044	72874654	Peak_1028	1448	.	10.1286	144.849	140.835	1134
chr2	205409750	205411029	Peak_1029	1448	.	12.9894	144.822	140.808	436
chr4	6717767	6718869	Peak_1030	1448	.	10.5317	144.82	140.806	400
chr7	43945471	43946627	Peak_1031	1447	.	13.507	144.787	140.773	618
chr12	12966151	12966826	Peak_1032	1447	.	8.69917	144.736	140.723	329
chr1	38157024	38158110	Peak_1033	1445	.	8.9061	144.591	140.579	807
chr22	38239680	38240433	Peak_1034	1445	.	8.38497	144.569	140.557	422
chr1	184020130	184021384	Peak_1035	1443	.	7.24021	144.375	140.364	830
chr1	53703634	53705037	Peak_1036	1443	.	11.1617	144.336	140.325	417
chr16	75681171	75682572	Peak_1037	1440	.	11.3245	144.073	140.063	813
chr15	55879523	55881194	Peak_1038	1439	.	9.26112	143.913	139.904	520
chr8	67836592	67837934	Peak_1039	1439	.	9.24271	143.913	139.904	959
chr1	24104360	24105516	Peak_1040	1438	.	17.5218	143.863	139.854	728
chr13	28195012	28196714	Peak_1041	1438	.	6.76546	143.84	139.832	1207
chr17	57969941	57971174	Peak_1042	1437	.	8.66616	143.782	139.773	519
chr4	144106064	144107199	Peak_1043	1437	.	14.1042	143.775	139.767	290
chr10	75011555	75012623	Peak_1044	1434	.	8.85601	143.45	139.444	698
chr11	10879046	10880685	Peak_1045	1432	.	8.48897	143.212	139.206	1163
chr13	50699735	50700914	Peak_1046	1431	.	11.8836	143.186	139.181	467
chr8	38088654	38089876	Peak_1047	1429	.	9.40318	142.982	138.978	616
chr1	46859763	46860603	Peak_1048	1428	.	8.64966	142.829	138.825	369
chr5	108083803	108084591	Peak_1049	1427	.	9.13728	142.8	138.797	454
chr17	43137788	43138515	Peak_1050	1427	.	8.29902	142.78	138.777	414
chr11	66610074	66611036	Peak_1051	1427	.	9.07875	142.766	138.763	520
chr20	62612328	62612917	Peak_1052	1427	.	10.5889	142.718	138.715	297
chr1	226595111	226595832	Peak_1053	1426	.	9.96394	142.693	138.69	366
chr20	1446846	1447724	Peak_1054	1426	.	11.4893	142.621	138.62	407
chr15	45458610	45459691	Peak_1055	1423	.	7.87035	142.366	138.365	439
chr4	183837743	183839317	Peak_1056	1423	.	14.944	142.362	138.361	584
chr18	2655175	2656924	Peak_1057	1422	.	8.45706	142.269	138.269	1259
chr1	38259395	38260307	Peak_1058	1419	.	12.2404	141.991	137.992	321
chr2	219433268	219434233	Peak_1059	1418	.	8.60015	141.878	137.88	601
chr17	3626473	3627847	Peak_1060	1418	.	7.99281	141.825	137.827	499
chr19	9648808	9649733	Peak_1061	1418	.	7.97831	141.825	137.827	414
chr1	212003297	212004430	Peak_1062	1417	.	11.6261	141.793	137.795	510
chr22	20067131	20069150	Peak_1063	1417	.	10.1884	141.789	137.792	878
chr18	11980300	11980996	Peak_1064	1416	.	9.61409	141.635	137.639	321
chr1	178994999	178996016	Peak_1065	1415	.	9.8448	141.577	137.581	637
chr9	32552185	32552749	Peak_1066	1415	.	11.4361	141.538	137.542	256
chr22	50311563	50312601	Peak_1067	1415	.	8.77055	141.529	137.533	331
chr7	150777064	150779185	Peak_1068	1414	.	7.84219	141.457	137.462	670
chr1	47133030	47134329	Peak_1069	1413	.	10.358	141.374	137.378	845
chr1	27286112	27287541	Peak_1070	1412	.	9.55433	141.245	137.251	592
chr19	35224816	35225632	Peak_1071	1409	.	9.16516	140.916	136.923	428
chr20	47804007	47804935	Peak_1072	1408	.	10.6754	140.84	136.848	573
chr3	49027063	49028482	Peak_1073	1407	.	12.0265	140.712	136.72	672
chr15	40330562	40331673	Peak_1074	1406	.	6.94102	140.665	136.673	726
chr17	80052906	80056268	Peak_1075	1405	.	9.24885	140.592	136.601	2945
chr3	51572427	51573307	Peak_1076	1405	.	8.71926	140.571	136.579	404
chr18	3261402	3263179	Peak_1077	1405	.	10.053	140.57	136.579	396
chr22	46457047	46458523	Peak_1078	1405	.	10.053	140.57	136.579	877
chr6	139308305	139309681	Peak_1079	1401	.	12.6493	140.132	136.143	626
chr19	4399862	4400646	Peak_1080	1400	.	10.1388	140.079	136.09	428
chr16	3507458	3508833	Peak_1081	1400	.	9.27023	140.02	136.031	330
chr10	132098458	132100442	Peak_1082	1399	.	9.11385	139.994	136.006	442
chr19	13066951	13068285	Peak_1083	1399	.	9.07703	139.994	136.006	788
chr11	118272203	118272891	Peak_1084	1399	.	7.53947	139.955	135.967	303
chr14	105486478	105487480	Peak_1085	1397	.	9.3061	139.786	135.799	475
chr11	14520748	14521872	Peak_1086	1397	.	12.4845	139.774	135.788	619
chr17	40427881	40428767	Peak_1087	1395	.	10.449	139.586	135.6	382
chr1	220267409	220268151	Peak_1088	1395	.	9.78237	139.555	135.57	326
chr16	67312361	67313911	Peak_1089	1394	.	12.0512	139.482	135.497	779
chr7	150101729	150102579	Peak_1090	1394	.	8.34538	139.451	135.467	414
chr2	96930938	96932613	Peak_1091	1393	.	11.3032	139.377	135.393	1236
chr19	4402440	4403384	Peak_1092	1393	.	9.54408	139.318	135.334	440
chr3	150263588	150264383	Peak_1093	1392	.	7.25521	139.254	135.27	501
chr15	78441586	78442720	Peak_1094	1391	.	10.1797	139.174	135.191	346
chr1	94374161	94375305	Peak_1095	1388	.	9.26781	138.8	134.819	524
chr11	82783027	82783717	Peak_1096	1386	.	8.65089	138.66	134.679	278
chr10	135121629	135122819	Peak_1097	1385	.	9.07065	138.556	134.576	570
chr9	128023784	128024730	Peak_1098	1385	.	8.00328	138.552	134.572	531
chr1	1623707	1624290	Peak_1099	1383	.	12.0878	138.33	134.351	270
chr14	35342717	35344492	Peak_1100	1383	.	10.8493	138.319	134.341	390
chr7	76178536	76179366	Peak_1101	1381	.	7.28477	138.176	134.198	331
chr7	73152591	73153172	Peak_1102	1380	.	8.45161	138.091	134.114	307
chr4	1856878	1858815	Peak_1103	1380	.	11.2453	138.064	134.086	875
chr1	226249220	226250240	Peak_1104	1380	.	9.0034	138.046	134.069	407
chr17	16556414	16557256	Peak_1105	1380	.	9.02181	138.046	134.069	418
chr4	71704374	71705689	Peak_1106	1380	.	12.5427	138.005	134.028	408
chr16	2255204	2256430	Peak_1107	1379	.	10.8594	137.94	133.963	331
chr11	71935619	71936476	Peak_1108	1379	.	9.96776	137.917	133.941	331
chr5	36240855	36242240	Peak_1109	1379	.	8.89864	137.912	133.936	1050
chr16	89283565	89284654	Peak_1110	1378	.	13.0968	137.845	133.869	372
chr4	99181313	99182399	Peak_1111	1377	.	11.6302	137.701	133.725	700
chr9	134269329	134270499	Peak_1112	1376	.	11.1678	137.676	133.701	750
chr1	182360010	182361764	Peak_1113	1376	.	7.97337	137.635	133.66	698
chr9	34637114	34638425	Peak_1114	1375	.	7.85708	137.574	133.599	551
chr6	39082254	39083401	Peak_1115	1375	.	10.2126	137.557	133.582	483
chr10	104402995	104406053	Peak_1116	1373	.	8.79403	137.367	133.393	1609
chr9	26956174	26956956	Peak_1117	1373	.	8.79403	137.367	133.393	340
chr20	45985421	45986909	Peak_1118	1372	.	7.83327	137.266	133.293	1088
chr16	74330319	74331336	Peak_1119	1372	.	11.1702	137.225	133.252	523
chr3	63848706	63850435	Peak_1120	1372	.	11.1702	137.225	133.252	640
chr6	116989318	116990027	Peak_1121	1372	.	12.028	137.22	133.247	429
chr5	78280381	78281419	Peak_1122	1372	.	11.2577	137.212	133.239	673
chr1	2343079	2345360	Peak_1123	1371	.	8.71808	137.115	133.143	632
chr1	17274367	17275497	Peak_1124	1369	.	7.70142	136.941	132.97	573
chr16	22448161	22449144	Peak_1125	1367	.	13.6624	136.71	132.74	580
chr14	102785962	102786950	Peak_1126	1367	.	9.7662	136.705	132.735	479
chr2	217276926	217277700	Peak_1127	1366	.	10.4839	136.653	132.684	340
chr12	12714340	12715266	Peak_1128	1366	.	11.5457	136.61	132.641	455
chrX	119005193	119006462	Peak_1129	1365	.	10.1442	136.527	132.559	728
chr8	42128561	42129463	Peak_1130	1363	.	10.1958	136.339	132.371	473
chr16	89626603	89628175	Peak_1131	1361	.	10.5759	136.114	132.148	731
chr10	29698226	29699331	Peak_1132	1361	.	8.94817	136.105	132.138	562
chr16	28633697	28635014	Peak_1133	1361	.	8.92977	136.105	132.138	958
chr19	33685427	33686574	Peak_1134	1360	.	10.8998	136.076	132.11	415
chr20	33679674	33681194	Peak_1135	1360	.	8.48233	136.003	132.037	850
chr17	43024139	43025349	Peak_1136	1359	.	9.98385	135.985	132.02	737
chr10	112679336	112680180	Peak_1137	1359	.	13.0642	135.973	132.007	280
chr14	34930801	34932265	Peak_1138	1359	.	13.8853	135.905	131.94	471
chr5	147763337	147764311	Peak_1139	1358	.	7.91354	135.806	131.841	319
chr12	108154053	108155124	Peak_1140	1357	.	11.9909	135.772	131.807	739
chr19	40696746	40698013	Peak_1141	1357	.	11.9909	135.772	131.807	441
chr2	239335141	239336168	Peak_1142	1357	.	12.0211	135.772	131.807	647
chr22	22221086	22222559	Peak_1143	1357	.	10.9721	135.712	131.748	601
chr9	21802599	21803838	Peak_1144	1355	.	11.5176	135.522	131.559	867
chr7	87848905	87849617	Peak_1145	1354	.	9.50228	135.463	131.501	282
chr16	23463916	23464662	Peak_1146	1354	.	8.70539	135.449	131.486	327
chr20	61846699	61848243	Peak_1147	1353	.	10.7792	135.33	131.368	588
chr2	112641127	112641959	Peak_1148	1352	.	12.2655	135.285	131.323	390
chr11	32112369	32113614	Peak_1149	1352	.	9.31602	135.284	131.322	590
chr14	69261954	69263400	Peak_1150	1352	.	9.29616	135.284	131.322	453
chr8	22297984	22299299	Peak_1151	1352	.	8.16099	135.232	131.271	316
chr2	201676537	201677635	Peak_1152	1351	.	10.0627	135.188	131.226	353
chr1	227922322	227923347	Peak_1153	1350	.	8.61324	135.015	131.055	479
chr7	99516442	99517767	Peak_1154	1350	.	7.06996	135.003	131.043	423
chr7	99678740	99679656	Peak_1155	1349	.	7.69928	134.996	131.036	470
chr9	35731685	35733163	Peak_1156	1348	.	7.88362	134.894	130.934	427
chr1	10002901	10003730	Peak_1157	1348	.	9.09551	134.877	130.917	432
chr1	243419226	243419841	Peak_1158	1348	.	9.09551	134.877	130.917	278
chr5	134240170	134241434	Peak_1159	1347	.	10.7012	134.714	130.755	456
chr21	33031796	33032833	Peak_1160	1346	.	9.295	134.674	130.716	471
chr4	128981737	128983676	Peak_1161	1346	.	12.3832	134.627	130.669	380
chr20	35917890	35918624	Peak_1162	1346	.	9.62695	134.608	130.65	381
chr10	45454521	45455197	Peak_1163	1345	.	10.3882	134.572	130.614	373
chr11	64781071	64782427	Peak_1164	1342	.	8.18805	134.266	130.311	874
chr19	507387	508017	Peak_1165	1341	.	9.08447	134.176	130.22	325
chr17	61850470	61851053	Peak_1166	1341	.	8.85613	134.171	130.216	289
chr17	43127843	43129046	Peak_1167	1339	.	8.49705	133.915	129.96	950
chr14	75642707	75643528	Peak_1168	1338	.	6.58201	133.851	129.897	474
chr1	62901374	62902090	Peak_1169	1336	.	9.63828	133.683	129.73	356
chr8	67624397	67625429	Peak_1170	1336	.	10.3533	133.642	129.689	552
chr6	90061801	90062756	Peak_1171	1336	.	16.6459	133.61	129.658	382
chr19	33792360	33794643	Peak_1172	1335	.	9.97493	133.598	129.645	910
chr3	184032345	184033843	Peak_1173	1335	.	7.23221	133.573	129.621	731
chr22	38082124	38083034	Peak_1174	1335	.	8.00544	133.523	129.572	311
chr13	50365789	50366705	Peak_1175	1335	.	12.2874	133.506	129.555	571
chr22	39096228	39097612	Peak_1176	1335	.	10.26	133.505	129.553	410
chr3	33839892	33840744	Peak_1177	1334	.	9.77016	133.455	129.503	439
chr4	156297398	156298133	Peak_1178	1334	.	9.74841	133.455	129.503	345
chr13	25860760	25861781	Peak_1179	1332	.	6.20341	133.281	129.331	620
chr9	96338035	96340108	Peak_1180	1332	.	10.2322	133.272	129.322	1423
chr19	40502446	40503633	Peak_1181	1331	.	6.90518	133.183	129.234	668
chr8	144717636	144718924	Peak_1182	1331	.	8.61234	133.107	129.157	722
chr3	150126026	150128777	Peak_1183	1330	.	7.8238	133.075	129.126	765
chr18	46986383	46987289	Peak_1184	1330	.	10.5744	133.054	129.105	510
chr11	44117043	44117945	Peak_1185	1330	.	9.91069	133.036	129.087	408
chr22	32870340	32871679	Peak_1186	1330	.	11.6179	133.008	129.06	512
chr7	73183829	73184734	Peak_1187	1329	.	7.74727	132.979	129.031	509
chr5	134181438	134182510	Peak_1188	1329	.	8.46286	132.971	129.022	340
chr9	95526048	95527890	Peak_1189	1329	.	8.46286	132.971	129.022	1484
chr18	811577	812812	Peak_1190	1329	.	9.03807	132.927	128.979	484
chr7	44162639	44163801	Peak_1191	1328	.	10.474	132.896	128.948	271
chr16	46723414	46724292	Peak_1192	1328	.	9.74921	132.844	128.897	291
chr19	662088	663977	Peak_1193	1327	.	10.0277	132.8	128.853	841
chr15	65809359	65810245	Peak_1194	1327	.	7.68824	132.75	128.802	515
chr1	6661783	6663399	Peak_1195	1327	.	9.73698	132.735	128.788	670
chr8	73921028	73921671	Peak_1196	1326	.	10.2814	132.606	128.659	255
chr5	172115218	172116300	Peak_1197	1325	.	7.93722	132.529	128.583	749
chr19	2426949	2428023	Peak_1198	1324	.	8.25356	132.465	128.519	825
chr12	11323625	11324484	Peak_1199	1322	.	11.3486	132.27	128.326	360
chr19	32895661	32897381	Peak_1200	1322	.	10.0347	132.232	128.288	533
chr19	36036053	36036973	Peak_1201	1321	.	8.62925	132.15	128.207	556
chr11	66205683	66206507	Peak_1202	1320	.	8.39449	132.029	128.086	480
chr9	19229786	19231309	Peak_1203	1320	.	8.39449	132.029	128.086	1158
chr17	39991839	39992638	Peak_1204	1320	.	9.86585	132.02	128.077	450
chr5	72143764	72144959	Peak_1205	1318	.	10.9309	131.882	127.94	487
chr10	119133628	119135673	Peak_1206	1318	.	10.4493	131.854	127.912	1200
chr4	146100662	146102384	Peak_1207	1317	.	12.9417	131.79	127.849	1267
chr20	7999610	8000543	Peak_1208	1316	.	11.4263	131.667	127.726	551
chr4	15682823	15683997	Peak_1209	1316	.	11.3976	131.667	127.726	780
chr5	32443455	32445309	Peak_1210	1316	.	9.50058	131.609	127.669	989
chr22	50682550	50684405	Peak_1211	1314	.	9.35834	131.488	127.548	962
chr8	8749137	8751165	Peak_1212	1314	.	10.2446	131.466	127.527	1430
chr12	44199525	44200467	Peak_1213	1314	.	10.1418	131.444	127.504	490
chr11	93517371	93518403	Peak_1214	1314	.	9.91633	131.41	127.471	437
chr17	684969	685993	Peak_1215	1314	.	9.93912	131.41	127.471	376
chr5	170288897	170289735	Peak_1216	1312	.	8.76409	131.285	127.347	315
chr7	72395490	72396364	Peak_1217	1312	.	8.74568	131.285	127.347	287
chr3	180706898	180707747	Peak_1218	1310	.	8.3603	131.089	127.153	456
chr6	167369362	167370505	Peak_1219	1310	.	14.1099	131.021	127.084	466
chr5	98264818	98265522	Peak_1220	1309	.	8.94235	130.984	127.048	310
chr11	58346661	58347318	Peak_1221	1308	.	13.2574	130.89	126.955	341
chr16	70322816	70323574	Peak_1222	1308	.	10.8511	130.82	126.884	412
chr5	180669701	180670961	Peak_1223	1307	.	9.15541	130.739	126.804	800
chr5	178286666	178287756	Peak_1224	1307	.	11.3589	130.715	126.78	711
chr1	41444951	41446851	Peak_1225	1306	.	10.2549	130.673	126.738	1013
chr16	1820441	1824373	Peak_1226	1306	.	10.2549	130.673	126.738	2512
chr5	171710060	171711270	Peak_1227	1306	.	12.8715	130.646	126.712	875
chr2	128144855	128145648	Peak_1228	1306	.	11.6391	130.61	126.676	395
chr9	100458912	100459836	Peak_1229	1304	.	8.2183	130.405	126.473	478
chr7	139043601	139044450	Peak_1230	1303	.	7.62432	130.357	126.425	573
chr9	127630643	127632329	Peak_1231	1303	.	7.62432	130.357	126.425	1050
chr7	149570220	149571498	Peak_1232	1303	.	8.29365	130.343	126.411	430
chr8	37756373	37757096	Peak_1233	1303	.	8.97224	130.308	126.377	367
chr15	43621786	43622746	Peak_1234	1302	.	7.24698	130.263	126.332	483
chr3	169490523	169491571	Peak_1235	1302	.	8.64592	130.238	126.307	371
chr1	36106539	36107420	Peak_1236	1301	.	8.32611	130.151	126.22	484
chr9	133454453	133455568	Peak_1237	1300	.	8.88491	130.016	126.086	677
chr1	228289831	228291204	Peak_1238	1299	.	9.17516	129.937	126.007	1020
chr14	23938806	23939461	Peak_1239	1299	.	12.5078	129.902	125.972	294
chr16	24740789	24741678	Peak_1240	1298	.	12.6181	129.855	125.925	500
chr15	50646138	50648119	Peak_1241	1297	.	8.49267	129.739	125.81	742
chr9	139376830	139377592	Peak_1242	1297	.	8.49267	129.739	125.81	487
chr12	122516055	122517250	Peak_1243	1295	.	10.1376	129.511	125.583	849
chr1	203764554	203765672	Peak_1244	1294	.	9.57436	129.433	125.506	339
chr7	101006840	101007476	Peak_1245	1294	.	10.101	129.406	125.479	359
chr5	132165615	132166870	Peak_1246	1293	.	9.01455	129.362	125.436	383
chr4	111117232	111118527	Peak_1247	1292	.	11.1845	129.274	125.349	754
chr17	64187116	64188362	Peak_1248	1292	.	8.30902	129.215	125.29	596
chr9	101983428	101985141	Peak_1249	1292	.	8.29193	129.215	125.29	546
chr7	12250811	12251473	Peak_1250	1291	.	7.5577	129.167	125.242	325
chr3	141943692	141944698	Peak_1251	1290	.	8.84662	129.05	125.125	583
chr21	44526969	44527986	Peak_1252	1290	.	12.0641	129.045	125.12	453
chr1	162467079	162468354	Peak_1253	1290	.	11.1234	129.039	125.114	735
chr5	134209545	134210930	Peak_1254	1287	.	8.45722	128.793	124.87	732
chr20	30697363	30698056	Peak_1255	1287	.	9.05569	128.783	124.859	350
chr9	5437405	5438122	Peak_1256	1287	.	10.7448	128.702	124.779	388
chr7	143598508	143599502	Peak_1257	1285	.	7.67423	128.558	124.636	560
chr9	137218618	137219457	Peak_1258	1285	.	9.23495	128.527	124.605	364
chr12	93322085	93323107	Peak_1259	1284	.	11.5195	128.425	124.504	636
chr11	33757514	33758574	Peak_1260	1283	.	8.91399	128.369	124.448	303
chr15	76603168	76604116	Peak_1261	1281	.	10.5011	128.141	124.222	351
chr3	122513799	122514696	Peak_1262	1279	.	7.79827	127.976	124.058	387
chr8	146277769	146278466	Peak_1263	1279	.	7.78283	127.976	124.058	268
chr8	145690224	145690929	Peak_1264	1279	.	9.99694	127.912	123.994	421
chr5	179125803	179126925	Peak_1265	1278	.	9.58546	127.897	123.978	479
chr5	112196295	112197478	Peak_1266	1278	.	8.43949	127.85	123.932	896
chr1	227127073	227127892	Peak_1267	1278	.	9.01581	127.808	123.89	457
chr20	48329589	48330836	Peak_1268	1277	.	10.8877	127.79	123.873	619
chr1	233463482	233465131	Peak_1269	1276	.	12.373	127.649	123.732	300
chr5	177658667	177660224	Peak_1270	1275	.	8.25539	127.512	123.596	1032
chr14	39644221	39645228	Peak_1271	1273	.	8.55493	127.385	123.47	513
chr15	25682932	25684793	Peak_1272	1273	.	9.734	127.354	123.439	599
chr1	116960779	116961627	Peak_1273	1273	.	6.82451	127.322	123.408	402
chr2	37383256	37384606	Peak_1274	1272	.	11.6494	127.241	123.327	639
chr17	66243369	66244800	Peak_1275	1271	.	8.78919	127.123	123.21	426
chr1	27247686	27248970	Peak_1276	1269	.	8.40404	126.909	122.997	715
chr20	49347969	49348888	Peak_1277	1267	.	7.59944	126.764	122.852	325
chr8	145149877	145151023	Peak_1278	1267	.	9.39088	126.761	122.849	302
chr9	86321896	86323739	Peak_1279	1266	.	8.11287	126.656	122.745	769
chr2	27434761	27435877	Peak_1280	1266	.	9.17889	126.605	122.694	591
chr5	1881683	1884177	Peak_1281	1266	.	9.17889	126.605	122.694	512
chr7	43965631	43966353	Peak_1282	1265	.	8.29882	126.518	122.608	440
chr11	125439119	125439933	Peak_1283	1264	.	7.45618	126.498	122.589	378
chr12	56109614	56110343	Peak_1284	1264	.	7.45618	126.498	122.589	395
chr1	9598725	9600488	Peak_1285	1264	.	8.8771	126.453	122.543	1110
chr5	32173583	32174854	Peak_1286	1264	.	8.4664	126.452	122.543	550
chr20	42838449	42839504	Peak_1287	1264	.	9.44383	126.439	122.529	745
chr14	100680269	100681380	Peak_1288	1264	.	8.71943	126.42	122.511	342
chr3	48955585	48957016	Peak_1289	1264	.	8.20646	126.417	122.509	950
chr5	150459980	150461091	Peak_1290	1263	.	9.7112	126.345	122.437	416
chr7	30324271	30325829	Peak_1291	1261	.	11.6187	126.147	122.239	617
chr4	48833123	48833828	Peak_1292	1258	.	10.867	125.859	121.953	387
chr16	30670241	30671612	Peak_1293	1258	.	10.4809	125.848	121.942	573
chr2	24346110	24347090	Peak_1294	1257	.	10.2245	125.773	121.867	503
chr11	32913753	32915290	Peak_1295	1257	.	11.8407	125.724	121.819	376
chr9	91932883	91933833	Peak_1296	1256	.	10.7782	125.67	121.765	280
chr8	67341013	67342483	Peak_1297	1255	.	9.07044	125.585	121.681	522
chr7	134000957	134001853	Peak_1298	1255	.	8.28135	125.583	121.679	661
chr8	144815147	144816105	Peak_1299	1255	.	9.54765	125.538	121.634	322
chr5	41925006	41925970	Peak_1300	1254	.	8.83783	125.487	121.583	598
chr5	141302702	141303735	Peak_1301	1253	.	7.30727	125.394	121.491	422
chr12	107167232	107168959	Peak_1302	1253	.	9.93352	125.312	121.41	1009
chr20	32077373	32078645	Peak_1303	1252	.	7.70563	125.266	121.364	952
chr20	4666879	4668120	Peak_1304	1251	.	11.0532	125.199	121.297	435
chr9	135229902	135230579	Peak_1305	1251	.	11.0819	125.199	121.297	281
chr1	42921382	42922966	Peak_1306	1250	.	8.33313	125.032	121.131	1070
chr11	64808660	64809488	Peak_1307	1249	.	9.21813	124.99	121.09	508
chr3	194990978	194991950	Peak_1308	1247	.	7.39816	124.728	120.829	653
chr20	44441111	44441917	Peak_1309	1246	.	8.18177	124.685	120.786	327
chr12	133337654	133338486	Peak_1310	1246	.	11.6401	124.633	120.734	460
chr1	35657517	35658883	Peak_1311	1245	.	8.68122	124.509	120.611	483
chr9	128002988	128003733	Peak_1312	1245	.	8.64346	124.508	120.611	464
chr19	49668428	49669055	Peak_1313	1243	.	9.87407	124.395	120.499	316
chr4	171010423	171011527	Peak_1314	1243	.	9.57445	124.334	120.437	718
chr19	59030366	59031778	Peak_1315	1242	.	7.78	124.232	120.336	659
chr3	141595281	141596449	Peak_1316	1242	.	11.6086	124.224	120.328	705
chr13	100634046	100635331	Peak_1317	1241	.	12.6352	124.196	120.301	674
chr6	131456198	131457276	Peak_1318	1241	.	10.9958	124.129	120.234	493
chr11	65685651	65686580	Peak_1319	1241	.	9.64351	124.118	120.222	629
chr9	37422231	37423318	Peak_1320	1240	.	8.27995	124.097	120.201	663
chr8	101571341	101572061	Peak_1321	1240	.	7.52466	124.086	120.191	387
chr18	9613724	9614547	Peak_1322	1240	.	11.3101	124.083	120.188	341
chr17	39845153	39845729	Peak_1323	1239	.	7.17539	123.958	120.064	276
chr1	40348687	40349275	Peak_1324	1239	.	8.83633	123.928	120.034	310
chr17	76210040	76211037	Peak_1325	1239	.	8.85627	123.928	120.034	481
chr1	215740443	215741574	Peak_1326	1236	.	10.8419	123.699	119.806	568
chr1	8762802	8763591	Peak_1327	1236	.	8.43274	123.672	119.779	381
chr1	150551135	150552488	Peak_1328	1235	.	8.53137	123.562	119.67	774
chr22	19434716	19435564	Peak_1329	1235	.	10.2091	123.506	119.615	268
chr12	2921707	2922504	Peak_1330	1234	.	7.62844	123.469	119.578	300
chr2	238968802	238969525	Peak_1331	1234	.	9.29154	123.463	119.572	408
chr16	28834463	28835973	Peak_1332	1234	.	10.4789	123.448	119.557	419
chr11	3399798	3400558	Peak_1333	1233	.	7.02096	123.341	119.45	437
chr21	35013448	35014226	Peak_1334	1233	.	9.55166	123.331	119.441	473
chr5	96142964	96143909	Peak_1335	1233	.	9.55166	123.331	119.441	662
chr10	12171124	12172263	Peak_1336	1233	.	10.1289	123.313	119.422	740
chr3	4508434	4509073	Peak_1337	1233	.	10.154	123.313	119.422	312
chr7	56173692	56174582	Peak_1338	1231	.	8.2445	123.163	119.274	333
chr14	100259234	100260444	Peak_1339	1231	.	12.1737	123.102	119.213	710
chr2	88354799	88355638	Peak_1340	1231	.	12.2079	123.102	119.213	271
chr10	5707801	5708898	Peak_1341	1230	.	10.3191	123.08	119.192	679
chr3	15900342	15900969	Peak_1342	1230	.	12.5279	123.063	119.174	339
chr13	99228252	99230062	Peak_1343	1230	.	11.1904	123.004	119.115	1480
chr19	51611050	51611803	Peak_1344	1229	.	7.17709	122.982	119.094	454
chr15	83735132	83736656	Peak_1345	1229	.	9.4175	122.97	119.082	619
chr7	158620894	158622906	Peak_1346	1229	.	9.43991	122.97	119.082	1040
chr17	79485711	79486773	Peak_1347	1227	.	8.15908	122.791	118.903	617
chr9	124921361	124922116	Peak_1348	1227	.	8.15908	122.791	118.903	488
chr11	93394576	93395457	Peak_1349	1226	.	9.03323	122.689	118.802	520
chr17	53828214	53829435	Peak_1350	1226	.	8.35474	122.667	118.781	394
chr12	123464918	123465949	Peak_1351	1226	.	8.56749	122.604	118.718	510
chr19	40030045	40030856	Peak_1352	1226	.	8.56749	122.604	118.718	520
chr8	48172624	48174172	Peak_1353	1223	.	9.77823	122.365	118.48	740
chr2	242625769	242627017	Peak_1354	1223	.	11.4935	122.31	118.426	861
chr16	2317368	2319075	Peak_1355	1222	.	10.0785	122.284	118.4	490
chr7	138665650	138667087	Peak_1356	1222	.	9.78994	122.264	118.38	880
chr2	133104871	133105543	Peak_1357	1222	.	5.90061	122.207	118.324	289
chr1	109618385	109618985	Peak_1358	1221	.	9.52845	122.111	118.228	343
chr10	38264919	38265685	Peak_1359	1220	.	10.293	122.042	118.16	412
chr2	223725652	223726544	Peak_1360	1219	.	11.1306	121.927	118.045	280
chrX	130036814	130037442	Peak_1361	1219	.	11.1605	121.927	118.045	309
chr14	89290871	89291541	Peak_1362	1218	.	8.10667	121.864	117.982	271
chr10	127511209	127511900	Peak_1363	1217	.	9.12662	121.779	117.898	393
chr1	153949429	153950321	Peak_1364	1216	.	8.42167	121.685	117.804	372
chr4	1721353	1723110	Peak_1365	1215	.	9.46588	121.575	117.695	1285
chr10	121631486	121633258	Peak_1366	1214	.	9.20452	121.49	117.61	631
chr12	6961276	6961814	Peak_1367	1214	.	6.57014	121.427	117.548	279
chr19	38865290	38866031	Peak_1368	1214	.	7.85746	121.409	117.53	331
chrX	56589819	56590931	Peak_1369	1213	.	11.5855	121.331	117.453	441
chr6	170123224	170124081	Peak_1370	1212	.	14.0991	121.241	117.363	517
chr10	23727976	23729828	Peak_1371	1211	.	13.1946	121.154	117.277	834
chr16	83932593	83933539	Peak_1372	1208	.	12.0369	120.871	116.995	399
chr1	226496330	226497595	Peak_1373	1208	.	8.23227	120.825	116.95	802
chr3	197517903	197518856	Peak_1374	1208	.	8.21426	120.825	116.95	514
chr17	4268562	4270059	Peak_1375	1207	.	7.5358	120.786	116.911	958
chr8	145514337	145515931	Peak_1376	1207	.	8.7103	120.785	116.91	1162
chr16	67596483	67597634	Peak_1377	1207	.	10.7044	120.748	116.873	597
chr7	32996783	32997751	Peak_1378	1207	.	10.7327	120.748	116.873	475
chr12	109250418	109251802	Peak_1379	1207	.	12.4566	120.713	116.839	742
chr5	65220926	65222393	Peak_1380	1207	.	8.49152	120.709	116.834	350
chr7	43797879	43798952	Peak_1381	1206	.	8.6805	120.689	116.815	694
chr3	130612149	130613061	Peak_1382	1206	.	8.62184	120.687	116.813	428
chr13	114238611	114240002	Peak_1383	1206	.	11.7742	120.657	116.783	1056
chr4	144434699	144435954	Peak_1384	1205	.	10.5891	120.573	116.7	296
chr1	247267064	247267814	Peak_1385	1205	.	10.673	120.524	116.65	388
chr2	135676348	135677194	Peak_1386	1200	.	8.67679	120.081	116.21	303
chr7	156802977	156804559	Peak_1387	1199	.	7.51098	119.969	116.099	803
chr8	42248735	42250105	Peak_1388	1199	.	7.93296	119.957	116.086	772
chr17	37617628	37618225	Peak_1389	1198	.	8.19625	119.894	116.025	277
chr22	21271648	21272648	Peak_1390	1198	.	9.02002	119.824	115.955	348
chr6	155054102	155055489	Peak_1391	1197	.	8.90837	119.773	115.905	915
chr9	140500102	140501437	Peak_1392	1197	.	9.7119	119.772	115.904	277
chr1	7831211	7832055	Peak_1393	1197	.	8.72043	119.735	115.867	339
chr16	28857569	28858483	Peak_1394	1197	.	8.64078	119.732	115.864	413
chr16	66583323	66584264	Peak_1395	1195	.	7.79144	119.592	115.725	582
chr5	130599235	130600249	Peak_1396	1195	.	11.7081	119.556	115.689	729
chr10	77168735	77169854	Peak_1397	1194	.	8.46373	119.495	115.628	425
chr8	141644059	141645667	Peak_1398	1194	.	9.60061	119.471	115.604	1088
chr20	5986261	5987481	Peak_1399	1194	.	10.6448	119.47	115.603	726
chr1	224370454	224372636	Peak_1400	1194	.	9.69607	119.422	115.555	1107
chr11	67980746	67981964	Peak_1401	1193	.	10.6245	119.325	115.459	429
chr1	92764031	92765225	Peak_1402	1186	.	9.82458	118.6	114.739	350
chr4	16227378	16229209	Peak_1403	1185	.	15.3579	118.571	114.71	521
chr11	35639934	35641134	Peak_1404	1185	.	9.05223	118.546	114.685	693
chr2	191398882	191399984	Peak_1405	1185	.	9.05223	118.546	114.685	681
chr14	24024992	24026235	Peak_1406	1185	.	8.04951	118.525	114.663	324
chr20	60813385	60814759	Peak_1407	1185	.	9.04812	118.509	114.648	469
chr21	40684990	40686383	Peak_1408	1183	.	12.9477	118.372	114.512	299
chr8	54934217	54935340	Peak_1409	1183	.	9.32375	118.352	114.492	411
chr12	96793305	96794374	Peak_1410	1183	.	9.6105	118.33	114.47	632
chr4	147096727	147097626	Peak_1411	1182	.	9.59849	118.231	114.372	325
chr17	30185714	30186358	Peak_1412	1181	.	11.4898	118.192	114.333	360
chr5	122180698	122181677	Peak_1413	1181	.	8.59702	118.17	114.311	436
chr5	112849219	112850388	Peak_1414	1181	.	7.88168	118.128	114.269	341
chr6	107077209	107077960	Peak_1415	1180	.	8.21183	118.046	114.187	391
chr17	61917973	61920252	Peak_1416	1180	.	9.21574	118.018	114.16	1963
chr17	76250042	76250791	Peak_1417	1179	.	9.14281	117.974	114.116	417
chr6	31628098	31628720	Peak_1418	1179	.	9.07171	117.937	114.079	351
chr9	139837825	139839240	Peak_1419	1179	.	9.00238	117.904	114.047	962
chr3	152879532	152881293	Peak_1420	1178	.	8.33958	117.88	114.023	718
chr1	161719276	161720169	Peak_1421	1178	.	8.39318	117.86	114.003	506
chr16	14723459	14724286	Peak_1422	1178	.	8.82513	117.841	113.984	462
chr10	43950445	43951117	Peak_1423	1177	.	7.69242	117.784	113.927	346
chr2	178128190	178130281	Peak_1424	1177	.	12.8707	117.751	113.895	1053
chr9	86237800	86238802	Peak_1425	1176	.	8.01405	117.603	113.747	556
chr13	25592186	25593116	Peak_1426	1175	.	6.83578	117.57	113.715	337
chr22	39101853	39102880	Peak_1427	1173	.	7.38362	117.399	113.545	295
chr9	80850848	80851807	Peak_1428	1172	.	7.39684	117.235	113.382	282
chr6	5261029	5261990	Peak_1429	1172	.	9.52669	117.229	113.375	380
chr19	9694660	9695569	Peak_1430	1172	.	7.99477	117.207	113.354	363
chr5	176853590	176854367	Peak_1431	1171	.	7.48944	117.131	113.278	309
chr12	57823806	57825143	Peak_1432	1171	.	9.89862	117.117	113.265	651
chr1	109203566	109204384	Peak_1433	1171	.	8.15661	117.115	113.263	415
chr5	150080091	150080725	Peak_1434	1170	.	7.25543	117.024	113.172	331
chr16	84149825	84151402	Peak_1435	1170	.	10.1051	117.009	113.157	455
chr17	74448299	74449343	Peak_1436	1170	.	10.1316	117.009	113.157	742
chr14	73393113	73393962	Peak_1437	1169	.	8.35478	116.919	113.067	324
chr14	50052533	50053159	Peak_1438	1168	.	7.65941	116.882	113.031	343
chr19	9785230	9786210	Peak_1439	1168	.	7.65941	116.882	113.031	365
chr7	6048245	6049453	Peak_1440	1168	.	8.67973	116.87	113.019	850
chr22	41252077	41252799	Peak_1441	1168	.	7.12259	116.85	113	447
chr7	107220377	107221208	Peak_1442	1167	.	7.6627	116.732	112.882	415
chr7	117823994	117824708	Peak_1443	1167	.	7.01165	116.712	112.862	408
chr12	50794552	50795475	Peak_1444	1166	.	6.89336	116.605	112.756	376
chr19	34286296	34287631	Peak_1445	1165	.	8.98696	116.595	112.745	908
chr20	34359561	34360441	Peak_1446	1163	.	11.1306	116.366	112.518	602
chr18	22006205	22007292	Peak_1447	1163	.	7.79621	116.307	112.459	661
chr5	179718255	179719858	Peak_1448	1162	.	8.53719	116.267	112.42	1191
chr1	224033103	224034656	Peak_1449	1162	.	9.40908	116.258	112.411	954
chr17	1464871	1466243	Peak_1450	1162	.	9.38545	116.258	112.411	1022
chr13	98627923	98629523	Peak_1451	1162	.	12.5887	116.227	112.38	581
chr3	138553008	138554295	Peak_1452	1159	.	8.37032	115.957	112.112	498
chr1	53685663	53686730	Peak_1453	1159	.	8.7845	115.926	112.081	598
chr17	79212404	79214074	Peak_1454	1159	.	8.57838	115.912	112.067	874
chr12	56367771	56368432	Peak_1455	1157	.	8.31057	115.73	111.886	292
chr9	140195480	140196452	Peak_1456	1157	.	8.31057	115.73	111.886	496
chr9	139621998	139623646	Peak_1457	1156	.	8.75272	115.634	111.791	495
chr6	26659411	26660181	Peak_1458	1156	.	8.94345	115.622	111.779	286
chr5	892498	893732	Peak_1459	1156	.	9.5283	115.613	111.77	331
chr8	21867166	21868438	Peak_1460	1155	.	7.79303	115.553	111.71	898
chr16	12008693	12009817	Peak_1461	1154	.	9.61158	115.476	111.633	507
chr17	74732449	74733666	Peak_1462	1153	.	7.76202	115.4	111.557	877
chr3	42844946	42846081	Peak_1463	1153	.	9.187	115.391	111.548	759
chr3	174158578	174159410	Peak_1464	1152	.	7.21056	115.277	111.435	425
chr10	70166220	70167440	Peak_1465	1152	.	7.98012	115.27	111.428	687
chr4	5712790	5713643	Peak_1466	1151	.	10.0002	115.162	111.321	428
chr13	79979287	79980982	Peak_1467	1151	.	9.70062	115.151	111.31	624
chr20	632860	634189	Peak_1468	1151	.	10.8434	115.139	111.298	780
chr11	65487420	65488377	Peak_1469	1150	.	8.24461	115.071	111.231	632
chr9	123963062	123964180	Peak_1470	1150	.	8.22562	115.071	111.231	774
chr14	105331613	105333158	Peak_1471	1149	.	9.20497	114.949	111.11	787
chr20	34540977	34542426	Peak_1472	1149	.	6.85234	114.905	111.066	993
chr11	75110432	75111037	Peak_1473	1148	.	6.36673	114.854	111.015	301
chr8	100024704	100025976	Peak_1474	1148	.	7.92542	114.85	111.011	479
chr16	3930641	3931614	Peak_1475	1146	.	11.6893	114.615	110.778	366
chr1	27021807	27024120	Peak_1476	1146	.	11.0027	114.607	110.769	1376
chr6	42858048	42858710	Peak_1477	1145	.	7.30421	114.592	110.755	317
chr21	34851470	34852800	Peak_1478	1144	.	10.7417	114.457	110.62	565
chr10	14919979	14921703	Peak_1479	1144	.	9.14142	114.408	110.572	1131
chr10	97415614	97416904	Peak_1480	1144	.	9.09583	114.408	110.572	630
chr12	72232938	72234219	Peak_1481	1144	.	9.11862	114.408	110.572	804
chr1	28844502	28845647	Peak_1482	1143	.	9.47741	114.398	110.561	388
chr1	6265678	6266863	Peak_1483	1143	.	7.41488	114.382	110.546	536
chr16	21530964	21532300	Peak_1484	1143	.	8.04616	114.335	110.5	988
chr20	33264501	33265109	Peak_1485	1143	.	8.06457	114.335	110.5	330
chr13	41885376	41886614	Peak_1486	1142	.	9.38311	114.235	110.4	433
chr19	572483	573371	Peak_1487	1141	.	8.15561	114.174	110.339	318
chr11	67187924	67188703	Peak_1488	1141	.	8.52736	114.103	110.269	309
chr13	22177704	22178612	Peak_1489	1140	.	5.81564	114.092	110.258	520
chr9	133709919	133710692	Peak_1490	1140	.	11.3774	114.089	110.255	514
chr3	12525825	12526704	Peak_1491	1140	.	8.51741	114.009	110.176	357
chr9	102668913	102669784	Peak_1492	1139	.	7.87224	113.936	110.103	318
chr2	102313687	102315031	Peak_1493	1139	.	14.4118	113.9	110.068	817
chr1	165667398	165667938	Peak_1494	1138	.	7.62585	113.887	110.054	268
chr8	58907021	58907835	Peak_1495	1138	.	8.21484	113.86	110.028	263
chr16	68119245	68120061	Peak_1496	1137	.	11.7846	113.797	109.965	273
chr7	154793881	154794726	Peak_1497	1137	.	9.78057	113.722	109.89	532
chr1	20834015	20834956	Peak_1498	1136	.	14.9457	113.654	109.823	457
chr11	47663414	47664111	Peak_1499	1135	.	7.71074	113.591	109.76	371
chr5	179232287	179234837	Peak_1500	1135	.	7.69365	113.591	109.76	431
chr9	14692832	14694160	Peak_1501	1134	.	9.48838	113.469	109.639	606
chr9	136999858	137001966	Peak_1502	1134	.	8.51654	113.436	109.606	862
chr9	33076153	33076912	Peak_1503	1131	.	6.40725	113.177	109.348	440
chr19	54960155	54961155	Peak_1504	1131	.	7.51442	113.149	109.32	336
chr3	9439315	9440232	Peak_1505	1131	.	9.59986	113.133	109.305	289
chr6	28234765	28235455	Peak_1506	1131	.	9.62505	113.133	109.305	288
chr9	130889529	130890314	Peak_1507	1130	.	8.36275	113.094	109.266	326
chr11	130029385	130030420	Peak_1508	1130	.	8.59623	113.046	109.219	510
chr1	166808249	166808924	Peak_1509	1130	.	8.59623	113.046	109.219	275
chr1	70670835	70671890	Peak_1510	1130	.	7.83679	113.024	109.197	668
chr19	30169093	30170003	Peak_1511	1128	.	7.22701	112.839	109.013	493
chr2	238875573	238876533	Peak_1512	1128	.	11.703	112.833	109.007	563
chr11	14379689	14380759	Peak_1513	1128	.	9.79676	112.805	108.979	804
chr7	127228033	127229170	Peak_1514	1125	.	7.89007	112.52	108.695	750
chr14	50998440	50999741	Peak_1515	1124	.	7.97252	112.492	108.668	551
chr18	12656865	12658011	Peak_1516	1124	.	8.33776	112.487	108.663	325
chr6	150184397	150185823	Peak_1517	1124	.	9.4391	112.47	108.645	637
chr18	9334656	9335449	Peak_1518	1124	.	6.8568	112.438	108.614	341
chr1	65431305	65432514	Peak_1519	1122	.	10.1167	112.24	108.417	794
chr10	99400377	99401077	Peak_1520	1122	.	8.21499	112.209	108.386	296
chr17	40706243	40707286	Peak_1521	1122	.	9.06824	112.208	108.386	612
chr3	126702203	126703071	Peak_1522	1122	.	8.82053	112.207	108.384	470
chr7	148787317	148788503	Peak_1523	1121	.	7.53633	112.175	108.352	726
chr1	223899894	223900951	Peak_1524	1121	.	7.34028	112.165	108.342	334
chr9	99774903	99776123	Peak_1525	1121	.	10.2225	112.161	108.339	741
chr17	76374565	76375379	Peak_1526	1121	.	8.35883	112.132	108.31	371
chr5	89769235	89770873	Peak_1527	1121	.	7.78361	112.115	108.293	670
chr17	7486016	7486962	Peak_1528	1120	.	7.55867	112.094	108.273	614
chr18	21083303	21084138	Peak_1529	1120	.	8.67891	112.092	108.271	418
chr10	81838075	81839302	Peak_1530	1119	.	8.13827	111.999	108.178	534
chr11	111895484	111896783	Peak_1531	1118	.	7.09091	111.806	107.986	456
chr9	134000783	134001552	Peak_1532	1117	.	7.64237	111.79	107.971	292
chr5	158690176	158690895	Peak_1533	1117	.	8.76941	111.754	107.935	284
chr8	145668804	145670371	Peak_1534	1117	.	8.76941	111.754	107.935	741
chr7	134854532	134855982	Peak_1535	1116	.	6.96305	111.681	107.862	655
chr3	57741874	57743075	Peak_1536	1115	.	11.6443	111.595	107.776	534
chr12	2904023	2905336	Peak_1537	1115	.	8.29788	111.548	107.729	347
chr17	80376156	80376862	Peak_1538	1114	.	9.23985	111.46	107.642	281
chr17	76164469	76165508	Peak_1539	1113	.	8.53339	111.332	107.515	327
chr19	19143710	19144996	Peak_1540	1113	.	9.44754	111.327	107.509	373
chr14	50359139	50360801	Peak_1541	1113	.	8.12435	111.313	107.496	960
chr17	56769362	56770435	Peak_1542	1112	.	7.32433	111.284	107.467	500
chr20	58514432	58515398	Peak_1543	1112	.	8.17615	111.277	107.46	380
chr19	18271566	18272390	Peak_1544	1112	.	8.20949	111.244	107.428	502
chr19	4669552	4670506	Peak_1545	1112	.	8.99921	111.231	107.414	589
chr5	168006050	168006827	Peak_1546	1112	.	7.74815	111.207	107.391	291
chr20	42478275	42478929	Peak_1547	1111	.	9.48139	111.184	107.368	295
chr1	1166571	1169051	Peak_1548	1111	.	8.49218	111.144	107.328	562
chr19	55918462	55919379	Peak_1549	1111	.	8.49218	111.144	107.328	410
chr9	36190790	36191476	Peak_1550	1109	.	7.23774	110.958	107.144	361
chr11	3078449	3079274	Peak_1551	1108	.	6.93405	110.826	107.012	448
chr18	32923665	32924568	Peak_1552	1107	.	8.7259	110.793	106.979	546
chr15	77362726	77363690	Peak_1553	1107	.	9.69228	110.779	106.966	538
chr14	53161611	53162808	Peak_1554	1106	.	7.9173	110.658	106.845	590
chr4	77068959	77070090	Peak_1555	1106	.	7.89889	110.658	106.845	453
chr2	232825947	232826932	Peak_1556	1106	.	7.44485	110.627	106.815	633
chr3	15140121	15140773	Peak_1557	1106	.	9.48593	110.613	106.801	413
chr17	61677979	61679029	Peak_1558	1106	.	8.25799	110.61	106.798	350
chr7	27212497	27213523	Peak_1559	1105	.	8.2719	110.552	106.74	662
chr1	145610578	145611503	Peak_1560	1104	.	7.29242	110.406	106.595	472
chr21	34775403	34776667	Peak_1561	1103	.	11.7179	110.367	106.556	496
chr16	15489472	15490718	Peak_1562	1103	.	10.1114	110.306	106.496	366
chr9	130547814	130549052	Peak_1563	1102	.	8.95319	110.255	106.445	710
chr1	2411751	2413424	Peak_1564	1101	.	7.1885	110.188	106.379	627
chr19	40022861	40023573	Peak_1565	1101	.	8.70018	110.184	106.375	423
chr14	23503426	23504531	Peak_1566	1100	.	9.76092	110.061	106.253	442
chr18	12948058	12948808	Peak_1567	1100	.	9.73433	110.061	106.253	442
chr1	26437188	26439075	Peak_1568	1099	.	13.3829	109.937	106.13	653
chr7	33101689	33102915	Peak_1569	1098	.	7.73796	109.854	106.046	905
chr2	136499242	136500317	Peak_1570	1098	.	8.63888	109.834	106.026	535
chr5	14011572	14012282	Peak_1571	1098	.	8.66063	109.834	106.026	371
chr12	104349932	104351559	Peak_1572	1097	.	11.0799	109.763	105.956	817
chr1	156710252	156711087	Peak_1573	1097	.	7.39534	109.742	105.935	541
chr17	18217535	18219365	Peak_1574	1097	.	7.82699	109.725	105.919	1249
chr15	80987030	80988575	Peak_1575	1096	.	10.3616	109.696	105.889	929
chr19	11750617	11751265	Peak_1576	1096	.	9.52325	109.687	105.881	290
chr1	9241898	9243053	Peak_1577	1096	.	7.91982	109.61	105.804	388
chr20	40246298	40247132	Peak_1578	1095	.	9.37471	109.545	105.739	515
chr9	128468887	128469847	Peak_1579	1095	.	7.24455	109.529	105.724	413
chr1	142618717	142619316	Peak_1580	1094	.	5.85855	109.497	105.692	291
chr1	208041645	208042914	Peak_1581	1094	.	9.29127	109.485	105.68	631
chr19	10982327	10982932	Peak_1582	1094	.	9.26663	109.485	105.68	251
chr3	179370393	179371583	Peak_1583	1093	.	7.1035	109.357	105.553	810
chr21	16436406	16437874	Peak_1584	1092	.	10.055	109.276	105.472	676
chr9	125675138	125675786	Peak_1585	1091	.	6.17528	109.191	105.388	322
chr22	18110968	18111607	Peak_1586	1091	.	7.22439	109.108	105.306	348
chr14	105155954	105156665	Peak_1587	1090	.	7.64187	109.021	105.219	304
chr9	25677289	25678789	Peak_1588	1089	.	10.5432	108.975	105.173	754
chr17	29035513	29037417	Peak_1589	1088	.	8.65612	108.845	105.044	1399
chr16	21610490	21611858	Peak_1590	1088	.	10.4508	108.808	105.007	639
chr10	88516292	88517369	Peak_1591	1087	.	14.4305	108.787	104.986	504
chr2	173940212	173941529	Peak_1592	1087	.	9.58781	108.762	104.962	779
chr10	126847069	126848509	Peak_1593	1087	.	11.5855	108.713	104.913	592
chr14	90722722	90723546	Peak_1594	1085	.	8.82234	108.561	104.761	383
chr17	65240585	65242001	Peak_1595	1085	.	8.82234	108.561	104.761	494
chr11	4115575	4116938	Peak_1596	1084	.	9.13727	108.445	104.647	837
chr6	7909851	7911354	Peak_1597	1083	.	8.30959	108.328	104.53	304
chr22	43252567	43253728	Peak_1598	1083	.	7.96596	108.301	104.504	548
chr12	64845517	64846587	Peak_1599	1082	.	8.44751	108.29	104.493	559
chr2	180128534	180129612	Peak_1600	1082	.	8.48703	108.278	104.481	522
chr4	2010354	2011639	Peak_1601	1082	.	8.67802	108.272	104.475	827
chr16	67562514	67563784	Peak_1602	1082	.	7.48853	108.213	104.417	538
chr8	144699046	144700723	Peak_1603	1081	.	7.62422	108.122	104.326	949
chr21	38361778	38363096	Peak_1605	1080	.	9.62797	108.038	104.242	772
chr6	36410003	36411475	Peak_1606	1079	.	7.31282	107.977	104.181	900
chr7	76022600	76023234	Peak_1607	1077	.	7.61762	107.718	103.924	247
chr9	26946590	26947563	Peak_1608	1075	.	7.60634	107.598	103.804	487
chr2	70520392	70521112	Peak_1609	1075	.	8.79954	107.595	103.801	407
chr7	75071333	75072361	Peak_1610	1075	.	14.379	107.578	103.785	553
chr20	56964211	56965156	Peak_1611	1074	.	9.03544	107.423	103.63	472
chr11	63952365	63953256	Peak_1612	1073	.	7.50729	107.386	103.594	588
chr1	95699602	95700418	Peak_1613	1073	.	7.94682	107.382	103.59	329
chr9	68454896	68456187	Peak_1614	1073	.	8.34651	107.366	103.574	796
chr1	17287163	17287797	Peak_1615	1073	.	10.6921	107.334	103.542	301
chr2	157292036	157293190	Peak_1616	1073	.	9.00021	107.331	103.539	714
chr2	74153834	74154508	Peak_1617	1073	.	9.04807	107.331	103.539	348
chr8	146077700	146079003	Peak_1618	1073	.	9.02414	107.331	103.539	526
chr11	92930473	92931323	Peak_1619	1073	.	8.50595	107.32	103.53	496
chr17	61522922	61525608	Peak_1620	1072	.	8.27924	107.299	103.508	1032
chr11	65819112	65820481	Peak_1621	1071	.	5.88914	107.194	103.403	950
chr6	52929734	52931216	Peak_1622	1071	.	6.93984	107.189	103.398	747
chr1	224544340	224545337	Peak_1623	1071	.	7.61318	107.149	103.358	499
chr6	126110892	126112126	Peak_1624	1070	.	10.545	107.041	103.252	779
chr2	178076738	178078311	Peak_1625	1070	.	9.57479	107.03	103.241	983
chr20	60757933	60758648	Peak_1626	1069	.	7.74418	106.938	103.149	281
chr13	25496363	25497122	Peak_1627	1069	.	6.04801	106.907	103.119	369
chr1	43855407	43856063	Peak_1628	1067	.	7.01086	106.767	102.978	342
chr14	24422616	24423582	Peak_1629	1067	.	12.7242	106.748	102.96	570
chr2	73460645	73462066	Peak_1630	1067	.	12.767	106.748	102.96	993
chr11	119039196	119040192	Peak_1631	1067	.	7.93232	106.701	102.913	460
chrX	39967280	39969257	Peak_1632	1066	.	11.5486	106.654	102.867	621
chr6	30312457	30313428	Peak_1633	1066	.	8.73117	106.631	102.843	576
chr5	162886631	162887364	Peak_1634	1065	.	6.6738	106.534	102.747	356
chr20	55926154	55926999	Peak_1635	1064	.	8.26327	106.427	102.641	320
chrX	152599462	152600228	Peak_1636	1063	.	14.2759	106.373	102.588	401
chr10	43891523	43892964	Peak_1637	1063	.	8.56736	106.358	102.574	551
chr2	228336707	228337592	Peak_1638	1061	.	10.6105	106.163	102.379	350
chr7	44121496	44122132	Peak_1639	1061	.	7.6964	106.109	102.325	364
chr2	239229017	239230158	Peak_1640	1060	.	10.2332	106.072	102.288	598
chr12	7078931	7080003	Peak_1641	1060	.	7.70739	106.032	102.249	718
chr3	133380058	133381181	Peak_1642	1059	.	7.28684	105.98	102.197	455
chr19	1907596	1908544	Peak_1643	1059	.	8.05857	105.956	102.173	523
chr7	95950715	95951813	Peak_1644	1059	.	8.07851	105.956	102.173	407
chr10	22725281	22726781	Peak_1645	1059	.	6.97998	105.907	102.124	874
chr22	44207665	44208940	Peak_1646	1058	.	6.86655	105.805	102.023	825
chr1	36395816	36397345	Peak_1647	1057	.	9.40498	105.756	101.974	798
chr1	28286127	28287353	Peak_1648	1056	.	6.52414	105.687	101.906	583
chr5	159826441	159827264	Peak_1649	1056	.	8.68559	105.669	101.888	481
chr11	235763	236360	Peak_1650	1056	.	9.74883	105.648	101.867	340
chr16	48643203	48644548	Peak_1651	1055	.	11.4756	105.558	101.777	622
chr15	44037818	44039470	Peak_1652	1055	.	7.38596	105.552	101.772	1097
chr5	178053385	178054090	Peak_1653	1055	.	7.85109	105.551	101.771	415
chr1	204485243	204486005	Peak_1654	1054	.	5.64033	105.447	101.667	450
chr12	59313076	59314579	Peak_1655	1054	.	7.50071	105.437	101.657	963
chr19	55769659	55770539	Peak_1656	1054	.	8.48163	105.413	101.634	573
chr5	180236809	180238371	Peak_1657	1054	.	8.54522	105.405	101.626	1073
chr19	58897335	58898940	Peak_1658	1053	.	7.54188	105.356	101.577	709
chr12	131356481	131357478	Peak_1659	1052	.	10.5644	105.22	101.441	554
chr11	61128894	61130141	Peak_1660	1052	.	7.20138	105.204	101.426	794
chr12	65173982	65175427	Peak_1661	1052	.	7.6086	105.202	101.424	973
chr20	48807179	48808706	Peak_1662	1051	.	7.06906	105.178	101.4	1037
chr16	837645	838402	Peak_1663	1051	.	9.59104	105.12	101.342	506
chr1	179923793	179924666	Peak_1664	1050	.	6.96454	105.049	101.272	299
chr20	42285993	42286878	Peak_1665	1050	.	6.96454	105.049	101.272	340
chr9	99616141	99616877	Peak_1666	1050	.	8.03862	105.032	101.255	462
chr1	229477507	229479122	Peak_1667	1050	.	9.46843	105.022	101.245	536
chr2	32581631	32583013	Peak_1668	1050	.	9.46843	105.022	101.245	1031
chr15	90118661	90119586	Peak_1669	1049	.	7.80778	104.931	101.154	299
chr7	75508274	75509038	Peak_1670	1049	.	5.56106	104.914	101.137	288
chr7	128044935	128046014	Peak_1671	1049	.	7.49998	104.913	101.136	679
chr8	91657423	91658557	Peak_1672	1049	.	9.53443	104.902	101.126	712
chr15	90808408	90809569	Peak_1673	1048	.	6.79226	104.889	101.113	598
chr22	38301864	38302860	Peak_1674	1048	.	8.70006	104.84	101.064	632
chr12	54411584	54412551	Peak_1675	1046	.	7.35178	104.67	100.895	475
chr8	101321367	101322727	Peak_1676	1046	.	7.35178	104.67	100.895	596
chr17	40020969	40021934	Peak_1677	1046	.	8.0374	104.668	100.893	462
chr19	10828667	10829514	Peak_1678	1045	.	8.18003	104.556	100.782	381
chr12	118573332	118574746	Peak_1679	1045	.	10.5284	104.545	100.771	793
chr11	64738936	64740047	Peak_1680	1044	.	8.89167	104.498	100.724	306
chr2	96192079	96193272	Peak_1681	1044	.	7.4884	104.463	100.689	636
chrX	152863885	152864460	Peak_1682	1044	.	12.5529	104.461	100.687	324
chr1	201122785	201123604	Peak_1683	1044	.	7.15017	104.437	100.664	462
chr2	220025094	220025764	Peak_1684	1044	.	8.85662	104.408	100.635	341
chr19	36485772	36486750	Peak_1685	1043	.	7.52987	104.382	100.609	519
chr15	85196958	85197801	Peak_1686	1041	.	6.91822	104.194	100.422	398
chr8	94752426	94753237	Peak_1687	1041	.	6.91822	104.194	100.422	375
chr2	242255361	242256363	Peak_1688	1041	.	10.5325	104.167	100.395	308
chr2	70417360	70418431	Peak_1689	1041	.	10.4687	104.167	100.395	617
chr17	3563464	3564743	Peak_1690	1041	.	7.25639	104.127	100.355	389
chr10	70480900	70481619	Peak_1691	1041	.	7.9788	104.11	100.339	305
chr8	86132165	86132669	Peak_1692	1040	.	6.3695	104.065	100.294	273
chr3	160472382	160473100	Peak_1693	1040	.	6.57526	104.032	100.261	406
chr7	102036642	102037453	Peak_1694	1040	.	7.46452	104.022	100.252	402
chr20	30795070	30796318	Peak_1695	1038	.	7.89532	103.845	100.076	365
chr6	41514120	41515097	Peak_1696	1038	.	9.69717	103.828	100.058	455
chr5	72860792	72861442	Peak_1697	1037	.	7.3005	103.789	100.02	338
chr3	140660672	140661747	Peak_1698	1037	.	8.61721	103.753	99.9835	625
chr7	140178353	140179185	Peak_1699	1036	.	7.06757	103.679	99.9108	396
chr12	117627466	117628449	Peak_1700	1036	.	11.8854	103.667	99.8984	608
chr19	7293530	7294835	Peak_1701	1036	.	9.13093	103.659	99.8903	630
chr10	99473299	99474616	Peak_1702	1035	.	8.27384	103.563	99.7959	444
chr7	64838595	64839291	Peak_1703	1035	.	8.74728	103.511	99.7434	349
chr5	177631013	177632577	Peak_1704	1034	.	8.49836	103.497	99.7297	797
chr1	3816248	3817089	Peak_1705	1034	.	8.60803	103.493	99.7259	350
chr22	43044876	43046005	Peak_1706	1034	.	8.95827	103.48	99.7128	858
chr3	134204184	134205625	Peak_1707	1034	.	8.80876	103.438	99.6714	988
chr19	4791723	4792811	Peak_1708	1032	.	6.76186	103.263	99.4973	405
chr3	155588370	155589803	Peak_1709	1032	.	6.53303	103.201	99.4362	865
chr14	103524039	103524764	Peak_1710	1031	.	9.09605	103.192	99.4267	379
chr21	47743104	47743948	Peak_1711	1031	.	9.09605	103.192	99.4267	491
chr11	71813483	71814554	Peak_1712	1031	.	8.35605	103.184	99.4195	712
chr16	1755817	1756773	Peak_1713	1031	.	8.35605	103.184	99.4195	586
chr11	76571508	76572550	Peak_1714	1031	.	9.68789	103.147	99.3822	572
chr2	61696932	61697950	Peak_1715	1031	.	13.3578	103.137	99.3719	683
chr11	124668994	124670857	Peak_1716	1031	.	7.41134	103.134	99.3691	1455
chr4	41992467	41993150	Peak_1717	1029	.	9.68755	102.945	99.182	264
chr17	29886271	29887542	Peak_1718	1028	.	9.10675	102.88	99.117	430
chr14	105260954	105261864	Peak_1719	1027	.	8.28909	102.783	99.021	656
chr10	70883828	70884509	Peak_1720	1027	.	7.37719	102.771	99.0088	317
chr14	77278438	77279298	Peak_1721	1027	.	7.11477	102.731	98.9686	508
chr1	47798792	47800556	Peak_1722	1026	.	8.11761	102.694	98.9322	985
chr2	190539002	190539808	Peak_1723	1026	.	8.11761	102.694	98.9322	321
chr9	132804553	132805826	Peak_1724	1026	.	9.0248	102.637	98.8753	458
chr18	18690921	18691732	Peak_1725	1025	.	8.87002	102.58	98.8186	428
chr15	76135394	76136860	Peak_1726	1025	.	8.70001	102.547	98.786	565
chr12	27863557	27864478	Peak_1727	1024	.	6.85647	102.488	98.7281	327
chr15	22833390	22834187	Peak_1728	1024	.	8.78483	102.471	98.7109	365
chr10	22610098	22610678	Peak_1729	1022	.	11.8893	102.295	98.536	263
chr11	65657974	65658928	Peak_1730	1022	.	8.29079	102.244	98.4853	303
chr6	71998250	71999362	Peak_1731	1022	.	12.9986	102.24	98.4816	487
chr1	32403044	32404527	Peak_1732	1022	.	9.04567	102.211	98.4529	551
chr2	27994472	27995095	Peak_1733	1021	.	10.4839	102.122	98.3643	229
chr15	41099137	41099839	Peak_1734	1020	.	7.24922	102.034	98.2762	276
chr8	30891318	30891911	Peak_1735	1020	.	9.2823	102.029	98.2713	267
chr10	35929917	35931238	Peak_1736	1020	.	11.7954	102.011	98.2541	900
chr18	48555943	48557456	Peak_1737	1019	.	9.96397	101.942	98.1854	845
chr6	170863265	170864034	Peak_1738	1019	.	9.96397	101.942	98.1854	349
chr14	69282842	69283625	Peak_1739	1019	.	6.5945	101.941	98.1842	514
chr19	50353839	50354922	Peak_1740	1019	.	7.71708	101.915	98.1581	378
chr8	76319367	76320488	Peak_1741	1018	.	7.35955	101.887	98.1301	344
chr8	28269023	28270056	Peak_1742	1018	.	8.48046	101.846	98.0895	354
chr13	45563282	45564270	Peak_1743	1017	.	9.19603	101.782	98.0264	626
chr9	140483634	140485800	Peak_1744	1017	.	8.83376	101.709	97.9539	810
chr1	228353323	228353863	Peak_1745	1016	.	8.30679	101.638	97.8829	275
chr8	143484022	143485350	Peak_1746	1016	.	8.87239	101.632	97.8772	798
chr15	63449264	63450362	Peak_1747	1016	.	8.40869	101.6	97.8459	610
chr17	48761251	48762394	Peak_1748	1015	.	7.13883	101.509	97.7549	870
chr4	139936921	139937622	Peak_1749	1015	.	8.71304	101.506	97.7528	306
chr16	68056255	68057775	Peak_1750	1014	.	9.88673	101.423	97.6699	1053
chr10	75910019	75910687	Peak_1751	1013	.	7.59198	101.383	97.6298	384
chr2	230787134	230787956	Peak_1752	1013	.	8.24728	101.306	97.5531	329
chr4	78739409	78741780	Peak_1753	1013	.	8.26903	101.306	97.5531	1724
chr15	69706494	69707380	Peak_1754	1012	.	7.21081	101.3	97.5472	398
chr14	102430878	102432076	Peak_1755	1012	.	7.68269	101.239	97.4864	556
chr19	57702726	57703739	Peak_1756	1012	.	7.7019	101.239	97.4864	447
chr5	6714307	6715137	Peak_1757	1012	.	10.042	101.205	97.453	383
chr1	193027643	193029318	Peak_1758	1011	.	7.75787	101.108	97.3559	668
chr7	6523107	6524256	Peak_1759	1011	.	7.7775	101.108	97.3559	469
chr11	69489546	69490332	Peak_1760	1010	.	6.98672	101.093	97.3414	403
chr4	2757669	2758147	Peak_1761	1010	.	9.8364	101.083	97.3316	208
chr5	140699757	140700518	Peak_1762	1009	.	7.04876	100.999	97.2478	369
chr2	153573294	153574110	Peak_1763	1009	.	9.93406	100.917	97.1663	467
chr18	61089318	61090414	Peak_1764	1008	.	8.01356	100.842	97.0918	610
chr2	677044	677839	Peak_1765	1008	.	8.03437	100.842	97.0918	237
chr1	63249413	63249932	Peak_1766	1008	.	6.27644	100.812	97.0625	233
chr1	39570571	39572347	Peak_1767	1007	.	8.14592	100.762	97.0131	735
chr17	73781063	73781673	Peak_1768	1007	.	6.55695	100.717	96.968	292
chr7	102789571	102790387	Peak_1769	1007	.	6.55695	100.717	96.968	483
chr16	1876090	1877678	Peak_1770	1006	.	10.5316	100.679	96.9305	600
chr4	4249513	4250720	Peak_1771	1006	.	10.0207	100.638	96.8899	343
chr2	86849593	86851678	Peak_1772	1006	.	8.67602	100.632	96.8845	978
chr3	57678169	57678912	Peak_1773	1006	.	8.67602	100.632	96.8845	425
chr1	247170730	247171471	Peak_1774	1006	.	8.49297	100.631	96.8829	376
chr13	20532140	20532728	Peak_1775	1004	.	7.15944	100.427	96.6799	321
chr5	151150073	151151074	Peak_1776	1004	.	6.51167	100.427	96.6797	676
chr19	11708083	11708920	Peak_1777	1003	.	8.22552	100.37	96.6234	295
chr2	11886261	11887600	Peak_1778	1003	.	8.18201	100.37	96.6234	765
chr5	154134907	154136880	Peak_1779	1002	.	7.16375	100.287	96.5412	1107
chr6	153304594	153305466	Peak_1780	1002	.	10.7036	100.21	96.4639	305
chr16	19124954	19125906	Peak_1781	1002	.	9.61804	100.203	96.4576	524
chr2	132248758	132250255	Peak_1782	1001	.	9.95047	100.176	96.4304	1122
chr7	107531434	107532402	Peak_1783	1001	.	7.60221	100.11	96.3653	305
chr22	41417456	41418922	Peak_1784	1000	.	7.81642	100.076	96.3315	787
chr1	155149259	155150047	Peak_1785	1000	.	6.22326	100.004	96.2592	473
chrX	71933564	71934333	Peak_1786	999	.	8.41209	99.9489	96.2048	436
chr2	47596115	47597414	Peak_1787	999	.	12.7674	99.9304	96.1867	943
chr5	177026681	177027629	Peak_1788	998	.	8.67595	99.8654	96.1225	571
chr9	6413076	6414121	Peak_1789	998	.	9.06544	99.8112	96.0686	394
chr8	11659639	11661041	Peak_1790	997	.	8.95343	99.7395	95.9973	897
chr7	7606161	7607189	Peak_1791	997	.	8.84985	99.7135	95.9715	516
chr6	166796007	166797290	Peak_1792	996	.	8.51349	99.6732	95.9316	939
[truncated: 6,919 more rows]

## Sheet: Table S3D
Supplemental Table S3D. ZFX binding sites in MCF-7
[truncated: 9,382 more rows]

[truncated: 3 more sheets: Table S3E, Table S3F, Table S3G]
