# Supplementary material for: ZFX acts as a transcriptional activator in multiple types of human tumors by binding downstream from transcription start sites at the majority of CpG island promoters
Source: Genome Res. 2018 Mar;28(3):310–20. doi: 10.1101/gr.228809.117 (PMC5848610; doi:10.1101/gr.228809.117)
Supplement: Supplemental Material [file supp_gr.228809.117_Supplemental_Table_S4.xlsx]

## Sheet: Table S4A
Supplemental Table S4A. Differentially expressed genes upon ZFX Knock down in C42B
Upregulated genes			Downregulated genes
Gene Name	FDR (siZFX vs siCtrl)	Expression change (ratio)	Gene Name	FDR (siZFX vs siCtrl)	Expression change (ratio)
AB019441.29	0.0167523	1.6003	ABCB10	1.90481e-09	0.426865
ABCA1	0.00466109	2.18428	ABCG1	4.40615e-07	0.386241
ABCA9	0.00516908	2.20352	ABHD15	2.39853e-05	0.626104
ABCC2	0.0143557	2.51468	AC004158.2	0.010586	0.591844
ABCC5	4.31661e-09	1.52186	AC004540.5	0.000808561	0.332695
ABCG2	8.24208e-05	2.05438	AC005003.1	0.000399788	0.651122
ABLIM3	0.00495468	1.67159	AC005943.5	0.000692513	0.628746
ABTB1	0.00416982	1.54487	AC007276.5	0.00169017	0.414764
AC000078.5	0.0206095	2.37237	AC007383.3	0.0274254	0.44416
AC000089.3	0.00553375	1.87748	AC007620.3	2.75502e-07	0.647927
AC004471.10	0.0283751	2.10102	AC010441.1	0.0309835	0.458858
AC005009.2	0.00177071	4.9323	AC010524.2	0.00445896	0.666528
AC005224.2	0.0024718	1.7402	AC010536.1	0.00640183	0.626951
AC005300.5	0.0268897	3.00381	AC011322.1	0.00366456	0.312208
AC005789.11	0.0187148	1.51084	AC012360.4	0.0478052	0.380905
AC005822.1	0.00984487	1.73729	AC015849.16	0.000178788	0.575534
AC007009.1	0.00300654	1.53059	AC018755.1	0.00020125	0.447734
AC009362.2	0.015739	2.27889	AC020571.3	0.000509263	0.653362
AC009404.2	6.31777e-05	1.57866	AC024580.1	0.0471973	0.65965
AC009495.3	0.0478405	2.12989	AC034220.3	3.20238e-05	0.437846
AC010468.1	0.0262629	1.58189	AC090616.2	0.0150002	0.598909
AC010547.9	0.0283992	2.7063	AC091729.9	0.000202149	0.608554
AC010970.2	1.49634e-05	2.35006	AC092667.2	0.00051113	0.520881
AC013268.2	6.44531e-05	1.67397	AC093415.2	0.00379604	0.484467
AC015987.2	1.20472e-08	1.58468	AC093677.1	0.0367328	0.396237
AC016712.2	0.00249088	4.07825	AC093724.2	0.00748157	0.598731
AC016734.2	0.0173473	1.54617	AC110299.5	0.0377538	0.346927
AC017081.2	0.00601852	1.89779	AC116366.6	0.00723274	0.535605
AC018766.6	0.0416515	2.31995	AC117395.1	0.040532	0.507583
AC019178.2	0.020122	2.61542	AC133785.1	0.000549989	0.502534
AC020663.1	0.0266109	4.54769	AC138969.4	1.11707e-08	0.543918
AC022431.1	0.000596856	1.6703	ACADSB	1.09286e-10	0.557275
AC027763.2	4.60577e-06	1.70625	ACAP1	0.00379843	0.631278
AC034102.1	0.000450642	2.71334	ACD	3.40359e-07	0.567987
AC040173.1	1.15558e-05	18.7052	ACOT7	9.43226e-07	0.622827
AC040977.1	0.048397	1.95333	ACOX2	0.000224979	0.276813
AC068522.4	0.0167928	2.59144	ACSBG1	0.00328065	0.591809
AC079250.1	0.00245902	1.95468	ACTA2	0.00637791	0.642102
AC084219.4	0.0289438	1.67504	ACTRT3	0.000489253	0.550466
AC087269.1	0.000317091	6.74568	ACVR2B-AS1	0.0111259	0.56212
AC087392.1	0.000159479	7.40578	ADAM28	0.0109638	0.601994
AC090425.1	0.00371715	3.07833	ADAP1	0.0322911	0.523353
AC090602.2	0.016185	2.37941	ADCK2	3.42027e-11	0.435416
AC090945.1	0.00531071	1.79667	ADCY1	1.36336e-07	0.510087
AC092155.1	0.00581763	2.88793	ADCY3	7.30523e-09	0.528547
AC092299.7	0.000237831	4.39537	ADCY7	1.96885e-07	0.600781
AC093106.5	0.0081102	2.37021	ADRA2C	0.0207237	0.663133
AC093673.5	0.0149909	1.6763	AK3	1.82886e-10	0.527364
AC096772.6	0.000326734	1.81955	AKAP7	5.86987e-05	0.508272
AC097724.3	0.0131894	1.87735	AKIP1	2.356e-07	0.646005
AC100830.3	0.0218472	2.34545	AKT1	2.26077e-11	0.609952
AC104843.3	0.00226604	3.15942	ALDH5A1	1.91248e-08	0.465367
AC114546.1	8.64427e-06	3.69143	ALX4	0.00114154	0.646794
AC119673.1	0.0274858	3.90082	AMER1	1.77739e-09	0.561466
AC128709.1	7.3399e-05	7.6188	AMFR	1.99505e-09	0.583589
AC131097.3	0.0357379	1.65153	AMIGO1	0.00015904	0.664535
AC131180.3	0.0156317	1.51756	AMZ2	2.05215e-09	0.641652
AC131180.4	0.000553932	1.51887	ANKRD10-IT1	0.0374211	0.489014
AC139452.2	0.0252005	1.97435	ANKRD13B	7.84931e-11	0.40268
AC140481.1	0.00512848	1.70085	ANKRD16	5.15156e-06	0.596083
AC144530.1	0.0198239	1.73474	ANKRD20A10P	0.0139433	0.372306
ACAD8	7.56231e-09	1.51948	ANKRD20A4	0.0106285	0.579588
ACER2	7.66943e-08	1.95746	ANKRD52	4.68512e-13	0.293514
ACRC	8.53089e-05	1.57164	ANKRD65	1.02982e-06	0.228712
ACSL5	0.0385987	1.65268	ANKS6	7.1218e-08	0.617553
ACSM1	0.0094632	1.64057	ANO6	2.69957e-09	0.630404
ACTBP2	0.0253976	1.72319	AP3M2	4.4682e-09	0.577506
ACTG1P9	0.0287758	2.36195	AP5B1	9.83851e-08	0.603112
AD000092.3	0.0121842	1.87324	APBA2	1.77848e-07	0.614061
ADAM32	0.0062524	2.21035	APC2	4.6072e-08	0.609245
ADAMTS17	0.00017023	1.96272	APLP1	2.39281e-08	0.634478
ADAT2	8.70511e-08	1.58222	APOBR	0.0439055	0.482929
ADCY10P1	0.0365283	1.66262	APOLD1	1.53608e-06	0.561827
ADCY5	0.00216481	1.68317	APPL1	2.82842e-10	0.628589
ADD3	5.77175e-10	1.56446	ARAP3	2.32488e-08	0.215794
ADORA2A	9.3374e-09	1.78799	ARC	1.32195e-06	0.649726
ADORA2A-AS1	5.68182e-07	1.56127	ARHGAP11A	8.88774e-10	0.660726
ADPRM	1.07278e-07	1.85913	ARHGAP21	1.00622e-09	0.473934
ADSSL1	0.000745862	1.55649	ARHGAP22	0.0409175	0.61577
AF131215.2	3.48452e-06	1.68293	ARHGAP31	0.000243525	0.625975
AF131215.9	0.000212858	1.74335	ARHGAP33	3.41731e-06	0.595889
AGAP11	0.0267183	2.46521	ARHGEF25	0.00814407	0.631095
AGBL3	4.16156e-05	1.68865	ARHGEF4	9.57549e-09	0.506925
AGPAT9	0.00191273	2.28652	ARL2BP	6.45425e-11	0.43198
AGT	0.0474645	1.92054	ARMCX4	2.02858e-05	0.504282
AHRR	0.00142564	1.53306	ARNT2	1.01048e-07	0.137687
AKR1B1	0.00626976	3.96024	ARNTL2	8.86271e-09	0.523299
AKR1B10	0.000141379	7.80044	AS3MT	0.0197774	0.581206
AKR1C1	1.43662e-05	8.67816	ASAP2	4.85907e-08	0.565507
AKR1C2	1.40259e-07	9.50934	ASPM	2.75696e-09	0.636357
AKR1C3	0.000762713	5.12436	ATAD2	4.20815e-09	0.657426
AL034548.1	4.03615e-05	5.20896	ATAD5	7.35248e-08	0.649892
AL133373.1	0.00913309	2.15789	ATP11B	1.67977e-10	0.631315
AL139099.1	0.0288332	1.60607	ATP5G1P4	0.0348302	0.478509
AL139819.1	0.0177331	3.81679	ATP5G3	1.23621e-08	0.666414
AL162151.3	0.0190616	1.8926	ATP6V1E2	1.70893e-07	0.548301
AL357153.1	0.0119929	4.66048	ATP6V1G2-DDX39B	2.39344e-07	0.494936
ALDH8A1	0.0258032	1.88417	AUNIP	1.67456e-05	0.598388
ALMS1P	0.0261389	2.29687	AURKB	5.49836e-09	0.580553
AMIGO2	0.0074227	1.92801	AXIN1	1.80706e-09	0.554813
AMPD3	0.0101046	2.91036	B3GALTL	1.05307e-06	0.612164
AMY2B	0.000353058	2.97233	B4GALT5	1.74861e-10	0.543268
ANGPT2	1.03479e-07	3.87995	B4GALT6	5.21e-08	0.379125
ANKRD1	0.000446368	3.15138	BACE1	3.06276e-08	0.638903
ANKRD29	4.25356e-09	1.62932	BAD	3.37896e-07	0.627019
AOC2	5.34417e-08	1.60139	BAG3	5.14494e-10	0.661922
AOC3	6.59038e-06	1.61394	BAI2	2.19931e-07	0.405191
AP000662.9	0.0334969	2.21068	BCAS4	0.000157042	0.362678
AP000962.2	0.00238221	2.96719	BDH1	1.8321e-10	0.593603
AP006222.2	0.00235702	1.66805	BEAN1	0.0415124	0.422746
AP5Z1	5.7979e-07	1.50276	BEND7	4.92812e-05	0.485241
APOA5	0.0465738	1.7467	BIVM	9.90171e-08	0.636456
APOF	0.00195209	2.1291	BLM	1.74282e-08	0.483699
ARG2	6.36272e-11	2.14148	BLVRA	7.46798e-10	0.4022
ARHGAP19-SLIT1	0.0267362	1.89167	BMP8B	8.92195e-06	0.583852
ARHGAP29	1.51373e-08	1.53466	BORA	0.000178565	0.659
ARHGEF3	3.83711e-05	1.67256	BRCA1	2.04399e-10	0.56043
ARID3A	7.76572e-07	1.57512	BRCA2	1.13691e-08	0.607536
ARRDC3	4.21679e-10	1.71839	BRD7	6.87554e-10	0.616451
ASL	1.30917e-07	1.54823	BRD7P2	1.97616e-07	0.545536
ASNSP1	0.0185994	2.07771	BRI3BP	8.54252e-10	0.574189
ATF3	2.8004e-12	3.16735	BRICD5	2.50993e-05	0.642695
ATP5F1P3	0.0470687	3.11447	BRIP1	6.0504e-08	0.593857
ATP8A1	9.11431e-05	1.78676	BTC	0.0136104	0.300394
ATP8B3	0.0471399	1.56839	BUB1	5.26003e-10	0.613797
ATP8B5P	0.0458952	2.83641	BVES	0.000527279	0.611054
ATXN1	2.43435e-09	2.45385	BX842568.2	0.00606999	0.591193
AVIL	0.00124648	1.60804	BZRAP1	1.02982e-06	0.591429
B9D2	0.00349572	1.65116	BZRAP1-AS1	0.00120326	0.402758
BACE2	4.57393e-05	1.81656	C10orf91	0.00673122	0.46759
BAMBI	6.36272e-11	1.67131	C11orf24	3.22291e-08	0.62656
BANF1P3	0.043445	2.1526	C11orf35	0.00155535	0.632726
BCAS1	0.000247008	2.13131	C11orf84	5.263e-08	0.606698
BCL2L15	0.0360271	2.02819	C11orf85	0.000853379	0.508862
BCO2	0.0128233	1.73194	C15orf52	2.15977e-07	0.652877
BDH2	1.35127e-05	1.8653	C16orf59	1.6157e-07	0.626649
BEST1	2.11763e-07	2.39818	C16orf93	3.81887e-07	0.402952
BEST4	0.0238289	3.1509	C17orf51	2.75059e-07	0.545081
BEX5	0.00280707	1.70019	C17orf53	0.000410091	0.627477
BFSP1	0.0167194	2.72254	C17orf67	0.000376213	0.620215
BIRC3	7.0432e-10	3.35843	C17orf82	0.0100816	0.28911
BLNK	0.0138127	1.63661	C17orf96	1.00622e-09	0.584205
BLOC1S5-TXNDC5	0.0176339	1.78308	C19orf57	0.000663756	0.660497
BMS1P1	0.00502769	1.73253	C1orf61	0.00335469	0.535851
BMS1P18	0.0421295	1.59387	C21orf58	2.13238e-09	0.517702
BMS1P2	0.0184247	1.51287	C2CD2	1.82886e-10	0.45765
BMS1P5	1.6721e-07	1.51376	C2orf48	0.0248774	0.656089
BNIPL	0.0189736	1.80132	C2orf72	2.13211e-06	0.638014
BTBD16	0.0347833	2.09909	C3orf67	0.00135111	0.613394
BTD	7.30615e-07	1.51697	C4orf46	2.11471e-07	0.652014
BTF3P5	0.0146986	3.05852	C5	3.87842e-07	0.362515
BTNL9	7.92069e-08	1.63014	C5orf38	0.000439887	0.546372
BX255923.3	0.00187254	2.45612	C5orf42	1.90424e-07	0.389986
C10orf10	0.00231695	2.05511	C5orf54	1.15031e-08	0.465981
C14orf182	0.0239068	1.56665	C5orf56	0.00118268	0.498043
C15orf27	0.0418851	1.53386	C7orf41	7.21649e-06	0.623178
C16orf45	0.00219487	1.92226	C9orf106	0.0430909	0.639674
C17orf103	1.92668e-06	2.592	C9orf139	0.0400663	0.490255
C17orf66	0.00930273	2.96662	CABLES2	5.85916e-09	0.385383
C1QTNF9B	0.000954363	1.73384	CADM4	5.71647e-05	0.610226
C1S	0.000759934	1.7384	CAPN15	1.84393e-11	0.540662
C1orf145	0.000256528	1.78834	CARS2	8.53194e-09	0.553287
C1orf162	0.00203125	3.05802	CASC2	0.0014583	0.534861
C1orf53	0.0389453	1.54523	CASC4	9.14513e-10	0.647225
C1orf54	0.0141954	1.92141	CASC4P1	0.000915386	0.577863
C1orf85	6.29626e-08	1.51984	CASC5	6.82104e-09	0.568942
C20orf196	0.00250432	1.98436	CASP6	3.44887e-06	0.629827
C3orf83	0.0350837	1.80455	CBFA2T3	0.0273533	0.413786
C4orf47	0.0244445	2.29737	CBFB	1.10956e-09	0.648572
C7orf43	4.39191e-08	1.58191	CBLN3	1.33515e-05	0.26247
C8orf4	0.00847667	1.87391	CCDC13-AS1	0.0135476	0.309727
C9orf131	0.0443827	1.75642	CCDC136	1.15747e-08	0.538219
CABP4	0.00161737	1.53675	CCDC171	0.00782958	0.637343
CABYR	0.0153331	1.79494	CCDC177	0.0160782	0.340079
CACFD1	1.14315e-09	1.85982	CCDC34	1.20009e-08	0.624213
CALCOCO1	3.34346e-07	1.62948	CCDC74A	1.41375e-07	0.520878
CAMK1D	0.000847638	2.51836	CCDC74B	0.000961131	0.525396
CASQ1	0.0131371	2.34739	CCDC92	9.54856e-06	0.511814
CATSPERB	0.000208194	2.32189	CCDC96	0.000268212	0.573271
CBR3-AS1	1.29281e-06	1.59802	CCNA2	6.96548e-10	0.651405
CC2D2A	7.98382e-07	1.7365	CCP110	3.12463e-09	0.640913
CCDC132	1.58711e-08	1.58935	CCSAP	2.27413e-10	0.533997
CCDC146	0.000327557	1.59502	CCSER2	1.07313e-08	0.528333
CCDC168	0.0146163	3.15566	CD276	1.57842e-11	0.497602
CCDC28A	0.000334519	1.5099	CD59	2.45365e-10	0.527297
CCDC64	3.36168e-06	1.5583	CDC20	7.76637e-10	0.63444
CCDC64B	2.11376e-07	1.56207	CDC20P1	0.000362348	0.592684
CCDC83	0.00569845	2.49031	CDC27	2.176e-10	0.502732
CCDC91	3.76036e-06	1.50361	CDCA3	1.14521e-09	0.615969
CCK	0.000562122	1.63952	CDCA4	3.61126e-09	0.595728
CCL20	0.0478448	2.33781	CDCA7	2.29145e-08	0.640949
CCL5	0.00642834	2.71189	CDH19	0.00118889	0.5348
CCND1	4.98041e-11	1.52835	CDKN2B-AS1	0.003068	0.356417
CCT5P1	0.0193135	2.50266	CDKN2C	3.64948e-10	0.448296
CD163L1	6.76511e-07	2.12419	CDKN2D	7.31735e-07	0.584904
CD300C	0.0304738	2.5719	CDPF1	2.01779e-05	0.60943
CD33	0.00586372	2.43	CDSN	0.00155017	0.201031
CD55	1.20207e-06	1.71342	CEBPA	5.50389e-08	0.51937
CDKL2	0.00839166	2.70956	CEBPA-AS1	2.86983e-06	0.577568
CDKN1A	8.09664e-10	1.81179	CECR5-AS1	0.0290108	0.382884
CDKN2B	0.00245381	1.69899	CELF4	0.000394967	0.420562
CDRT1	0.00137189	1.56367	CELSR2	4.31112e-12	0.362236
CDRT4	0.0378108	2.16267	CEND1	0.0132659	0.524493
CECR2	6.87783e-06	2.26107	CENPA	7.00796e-08	0.622421
CERS6-AS1	0.000849089	1.90212	CENPE	1.04449e-09	0.53019
CFL1P1	0.00683124	3.18591	CENPF	3.01312e-10	0.589726
CHAC1	1.09694e-06	1.88729	CENPI	1.63584e-07	0.598477
CHCHD2P6	0.0365322	1.809	CENPJ	1.80227e-09	0.580148
CHN1	0.0416219	2.26653	CENPK	4.77949e-07	0.651325
CHST11	0.00537758	1.58441	CENPP	5.02972e-07	0.664883
CHST2	0.0368436	2.28815	CEP112	1.0214e-07	0.151147
CICP6	0.00288435	3.1903	CEP135	3.4176e-06	0.634915
CLEC18A	0.00119957	4.57064	CEP19	1.80509e-05	0.523537
CLEC18B	0.0436189	1.70815	CEP250	2.22943e-08	0.654295
CLIC1P1	0.0232014	2.18477	CEP55	1.11586e-09	0.61914
CLIC2	0.026279	2.07763	CEP78	5.19647e-11	0.511583
CLIP4	0.000279125	2.83955	CEP85L	9.19715e-06	0.582761
CLP1	3.29347e-08	1.62172	CERS1	0.0411959	0.58252
CLYBL	8.22277e-05	1.59105	CHAF1B	2.71495e-09	0.512594
CNN3	0.0469233	1.99469	CHKB-AS1	0.000727327	0.530569
CNTNAP4	1.44699e-05	1.53783	CHST14	1.73454e-09	0.501584
COL16A1	0.000299138	2.41383	CHST15	0.00238531	0.590266
COLCA1	1.98155e-06	1.5673	CHST3	2.94928e-09	0.246453
COLEC12	0.000408271	1.51652	CHTF18	1.84317e-10	0.595209
COLQ	4.38366e-05	2.05864	CIDEB	8.57695e-06	0.444905
COQ10B	2.78645e-08	1.6146	CIT	5.03654e-09	0.608898
CORIN	0.000767211	1.94282	CITED4	3.2575e-06	0.467275
CORO7-PAM16	0.0342306	3.62239	CIZ1	4.98742e-11	0.518097
COX7CP1	0.0126683	1.84074	CKAP2	6.91032e-10	0.647367
CPEB2	7.30248e-07	1.58833	CKAP2L	1.34038e-08	0.648021
CPEB3	1.25707e-09	2.18416	CKAP5	1.81614e-10	0.663722
CPM	2.4191e-05	4.93384	CLDN14	0.0450219	0.58179
CREB5	0.00455668	1.91834	CLDN5	0.019599	0.514676
CREBRF	1.47926e-09	2.26191	CLIP2	9.11607e-06	0.293022
CRYAB	0.00360438	2.29907	CMPK2	3.8145e-06	0.444641
CRYM	0.0235672	1.62818	CMTM4	3.04002e-11	0.522451
CSAG4	0.00464445	1.62107	CNIH2	0.00511289	0.591623
CTA-246H3.12	0.0382437	1.72967	CNOT6L	1.76188e-09	0.488756
CTA-363E19.2	0.0499323	1.84823	CNOT6LP1	0.0162621	0.567511
CTA-390C10.10	0.00438601	1.56832	CNTNAP1	0.00453418	0.623913
CTA-445C9.15	0.0465109	1.648	COCH	7.93697e-05	0.654807
CTB-118N6.3	0.00566399	1.96994	CORO1A	0.00329825	0.564598
CTB-13H5.1	0.000126837	1.56153	CORO2A	1.04449e-09	0.561367
CTB-167B5.2	0.00746422	2.88659	CPAMD8	0.00799013	0.47409
CTB-176F20.3	0.00648075	1.67664	CPD	1.08205e-09	0.648146
CTB-36O1.7	0.00694229	1.75124	CPNE3	4.5473e-11	0.591151
CTB-63M22.1	0.00274063	1.93378	CRLF3	2.61858e-07	0.666459
CTC-246B18.10	0.0283659	2.28996	CRMP1	8.77276e-07	0.445349
CTC-250I14.1	0.0226482	2.0333	CROCCP3	0.00799758	0.637807
CTC-251D13.1	0.000452592	1.77354	CRTAP	2.04399e-10	0.584574
CTC-260E6.2	0.00233104	2.01054	CRTC3	2.09946e-09	0.370426
CTC-273B12.6	0.000532546	2.20352	CRYL1	1.106e-05	0.646259
CTC-308K20.1	0.000265668	2.06461	CSF1	0.000407803	0.492131
CTC-325H20.7	0.0387274	2.36112	CTB-75G16.3	0.0341784	0.336102
CTC-444N24.11	5.49292e-08	1.71486	CTC-241N9.1	0.0213204	0.543878
CTC-451P13.1	0.00290457	1.80894	CTC-425O23.2	0.00843598	0.521966
CTC-471F3.4	0.0175541	1.56259	CTC-523E23.5	0.0328122	0.610179
CTC-471F3.5	0.000300343	2.1057	CTD-2006C1.6	3.0648e-06	0.409625
CTC-471F3.6	0.0149235	2.33642	CTD-2173L22.4	0.000135408	0.543093
CTC-510F12.6	0.000189498	18.913	CTD-2207O23.3	0.0358128	0.162568
CTC-542B22.2	0.0113413	2.56395	CTD-2213F21.2	0.0470716	0.564187
CTC-559E9.8	0.0403873	2.43159	CTD-2319I12.4	0.0061351	0.552445
CTC-575D19.1	0.00017613	1.74944	CTD-2377O17.1	0.0301349	0.392708
CTD-2008P7.9	0.00289485	2.41704	CTD-2537I9.12	0.0184495	0.644819
CTD-2086L14.1	0.0154916	4.2834	CTD-2574D22.2	5.86691e-05	0.43504
CTD-2086O20.3	0.000178125	2.75125	CTD-3065J16.6	0.000349944	0.374688
CTD-2161E19.1	0.00577157	1.97512	CTD-3092A11.1	4.80915e-05	0.18438
CTD-2184D3.6	0.0449503	4.11218	CTD-3092A11.2	6.84422e-09	0.288711
CTD-2192J16.20	0.000147766	1.58967	CTDSPL2	3.04002e-11	0.498966
CTD-2192J16.26	0.0288689	1.73988	CTNNAL1	3.73918e-09	0.603476
CTD-2270N23.1	0.0129671	1.83477	CTNNBIP1	1.25194e-07	0.631284
CTD-2311B13.7	0.0110615	1.84136	CTSL	1.28756e-10	0.550705
CTD-2328D6.1	0.0018651	1.69847	CTSZ	4.44092e-13	0.202855
CTD-2331H12.5	0.000202426	2.26022	CUEDC1	3.23006e-05	0.655631
CTD-2410N18.4	0.0488988	1.77305	CUL1	1.26633e-09	0.59262
CTD-2541J13.1	0.00567581	1.97478	CUX2	0.00465224	0.306481
CTD-2541M15.1	3.87255e-05	2.66746	CXCL13	0.00532887	0.519008
CTD-2541M15.3	0.00410214	2.54977	CXCL16	6.26455e-09	0.60408
CTD-2541M15.4	0.000216749	1.67795	CYFIP2	8.79446e-09	0.247392
CTD-2562J17.7	0.0079641	1.83792	CYP2C19	0.00993646	0.539065
CTD-2583A14.11	0.000495273	1.56154	CYP4F12	0.00454763	0.255283
CTD-2611O12.8	0.042668	2.37613	CYP4Z1	0.0260601	0.453217
CTD-2626G11.2	0.000873366	2.54655	DAPK1	3.3681e-05	0.394686
CTD-3064H18.1	0.000510273	2.84754	DDHD2	1.51373e-08	0.635
CTD-3099C6.11	0.00768353	1.76486	DDR1	1.11922e-10	0.579225
CTD-3110H11.1	0.0289381	2.33374	DDX12P	1.7479e-07	0.581704
CTD-3185P2.1	0.000588771	1.56571	DDX60	0.00126397	0.580149
CTD-3193O13.10	0.0235642	2.67082	DEFB132	9.17758e-05	0.634554
CTSA	1.20491e-09	1.54197	DENND1B	9.85314e-09	0.574623
CTSK	1.41662e-05	2.25691	DEPDC1	1.25881e-11	0.541526
CTSO	8.92195e-06	1.9079	DERL3	5.36705e-08	0.581484
CUBN	0.0119217	1.85063	DGCR5	0.000431246	0.295377
CXCL10	0.0358062	2.34455	DGKE	1.67375e-11	0.420971
CXCR5	0.0252646	2.76546	DHFRP1	1.24363e-07	0.653648
CXorf36	5.80588e-05	3.6201	DIAPH3	5.24873e-08	0.655714
CYB561D1	2.85129e-07	1.51824	DICER1-AS1	0.00253603	0.64091
CYP1A1	4.75305e-06	1.62402	DIRC2	6.5636e-10	0.35995
CYP1A2	0.000255493	2.27259	DIS3L	4.31112e-12	0.350076
CYP2E1	0.0427295	1.51088	DLAT	2.8004e-12	0.440356
CYP2S1	0.0444118	1.78291	DLX2	3.45028e-05	0.564909
CYSTM1	0.00019886	1.61937	DLX3	0.00315973	0.517231
DCAF13	5.56962e-10	1.50402	DMBX1	2.93183e-06	0.254317
DCAF4L1	7.90339e-05	1.69778	DMTN	8.6937e-09	0.559383
DDIT3	2.75696e-09	1.87012	DNAH10OS	0.0441872	0.536023
DDR2	1.24334e-09	3.02525	DNAJB7	0.0167545	0.458179
DDX11L2	0.00126105	1.82558	DNAJC6	0.000253028	0.541141
DDX58	0.000324722	1.60963	DOCK7	1.14521e-09	0.603017
DEPTOR	1.53608e-06	1.53738	DOK1	0.0188203	0.633301
DHRS3	3.29109e-06	1.56184	DONSON	2.99626e-06	0.662189
DIO3	2.76064e-05	8.2905	DPY19L2P2	0.0001227	0.353869
DIO3OS	0.0111307	3.30899	DPYSL5	1.12389e-05	0.598306
DISC1	0.0268561	2.17326	DRP2	0.00358733	0.601517
DLGAP1-AS1	0.00360644	1.77502	DTX4	0.018756	0.581971
DLGAP1-AS2	0.00514857	2.24563	DUSP7	3.58954e-07	0.645358
DNAH6	0.00351921	2.25538	DUSP9	4.08341e-07	0.661174
DNAH7	0.00117244	1.81833	DVL3	7.7529e-10	0.65047
DNAJB9	9.33964e-10	1.56994	DZIP1	9.42449e-08	0.367581
DNAJC12	3.261e-05	1.56637	E2F1	3.73918e-09	0.626339
DNAJC28	0.000631671	1.75331	E2F2	4.3452e-07	0.625991
DNAJC9-AS1	0.00145503	2.14733	E2F7	9.42765e-10	0.587061
DOCK4	1.70893e-07	1.97042	EBF4	0.00743778	0.660154
DPH3P1	0.00849354	2.12319	ECHDC3	9.25095e-10	0.419355
DTNA	0.00901704	2.57735	EDN2	0.000594006	0.536095
DTX3	0.000883473	1.90655	EEA1	5.58648e-10	0.502268
DUSP1	1.61042e-08	1.78856	EGLN1	6.54281e-10	0.605819
DUSP10	2.63901e-07	2.13321	EID2B	0.000335753	0.64985
DYNLRB2	0.0392244	1.96089	EIF2AK2	7.90543e-12	0.381147
DYX1C1-CCPG1	0.00647199	2.85766	EIF2AK4	7.96496e-12	0.510305
EDARADD	0.0239188	2.53928	EIF4HP1	2.4256e-08	0.594902
EDEM3	6.87554e-10	1.52784	EIF5A2	1.4262e-08	0.513988
EDN1	0.00252058	2.47447	ELMOD3	7.30615e-07	0.62863
EEF1A1P11	0.00101949	1.8349	ELOVL4	0.0153167	0.567537
EEF1A1P12	0.00663209	1.69121	ELOVL6	1.60974e-06	0.66592
EEF1A1P13	0.0111295	1.62479	EME1	4.54518e-08	0.584983
EEF1A1P19	0.0243523	1.54767	EMILIN1	0.0235672	0.537794
EEF1A1P22	0.0318462	1.55961	EML1	1.91288e-10	0.44124
EEF1A1P24	0.0470913	1.87083	EN2	5.9126e-06	0.522909
EEF1A1P29	0.0402928	2.20357	EPHA10	2.76064e-05	0.43904
EEF1A1P8	0.00344574	2.27987	EPHB2	8.27162e-05	0.62167
EEF1A1P9	0.0118025	1.62362	EPHB3	2.8177e-07	0.589846
EEF1DP3	0.0463694	1.5814	EPHB6	0.00613822	0.620593
EEF1GP1	0.0473989	1.91002	EPN3	4.487e-10	0.577593
EEF1GP5	0.0210018	1.58441	ERO1LB	8.02385e-06	0.651079
EFNB3	0.0101192	1.97095	ERVW-1	0.0305294	0.465983
EID3	0.0182555	2.06018	ESCO2	2.60642e-07	0.605382
EIF2S2P3	0.0343679	1.85159	ESPL1	2.75692e-10	0.545255
EIF3LP2	0.0328414	1.98944	EVC	9.98451e-10	0.382902
EIF4A1P2	0.00355875	1.54701	EXD3	0.00108484	0.649366
EIF4HP2	0.0492325	1.69544	EXOC5	1.30977e-10	0.643475
ELF3	9.85777e-09	2.00667	EXOC5P1	0.00342688	0.587261
ENC1	2.69916e-10	2.21869	EXT2	2.87813e-09	0.521378
ENO4	0.0245905	1.51687	EXTL3	6.08956e-09	0.637839
ENPP3	0.0205524	1.90349	EXTL3-AS1	0.00441091	0.490261
EOMES	0.0217287	1.83614	F2R	4.39022e-06	0.609097
ERP29P1	0.0172219	2.80437	FADS1	7.14297e-10	0.644922
ETNPPL	0.0334013	2.24168	FAM102B	1.77308e-08	0.547045
FAAH2	0.00416439	1.61681	FAM115A	6.87554e-10	0.655694
FABP6	0.00279623	1.82322	FAM115B	1.27732e-07	0.452158
FAM13A-AS1	2.53922e-08	2.02376	FAM120C	2.72997e-08	0.629256
FAM154B	0.0235523	1.76454	FAM124A	0.000751332	0.557468
FAM171B	0.0101046	3.37378	FAM131C	0.00494856	0.30992
FAM20A	0.0387274	1.72075	FAM132B	1.74005e-05	0.335469
FAM214A	9.83091e-11	1.5273	FAM13C	2.35968e-05	0.540398
FAM214B	5.67797e-08	1.63601	FAM149A	3.80181e-05	0.191352
FAM217B	2.13064e-09	1.92613	FAM169A	2.34796e-09	0.376173
FAM21A	2.55268e-10	1.6131	FAM182B	0.0390593	0.558807
FAM21FP	0.0145473	2.03357	FAM186B	0.0465213	0.612907
FAM227B	0.00195799	1.53738	FAM189B	3.31455e-10	0.594305
FAM229B	0.000507918	1.70251	FAM20C	0.0289192	0.497283
FAM46A	0.0134143	1.83343	FAM219A	3.66814e-08	0.544579
FAM65C	0.0196404	2.46764	FAM32A	1.66067e-08	0.663199
FAM71F1	0.0180569	1.80027	FAM3C2	0.00189878	0.625099
FAM83G	9.86124e-08	1.51355	FAM45A	1.77308e-08	0.635413
FBN1	0.000215357	3.15083	FAM45B	0.0222319	0.602159
FBXO32	3.42332e-06	3.31986	FAM53A	0.00421313	0.649314
FBXO8	1.51157e-06	1.55583	FAM57B	0.00176141	0.496066
FCRLB	0.0146974	1.59485	FAM58A	1.60694e-08	0.495751
FDFT1	8.55713e-11	1.52252	FAM64A	5.20702e-09	0.65748
FDPSP7	0.0221791	1.6473	FAM65A	4.87998e-12	0.386373
FERP1	0.0307139	1.60692	FAM66B	0.000223638	0.306988
FGD3	4.71673e-05	1.64046	FAM66D	0.0391502	0.386094
FGF11	0.0359476	2.33966	FAM69B	8.63917e-07	0.567759
FGF13	1.97916e-07	2.04417	FAM78A	0.00156232	0.636502
FGF18	0.022919	2.22255	FAM83A	0.00824782	0.404436
FHIT	0.0252276	1.50269	FAM83D	7.87887e-11	0.614626
FIG4	2.30947e-07	1.63458	FAM83F	9.42765e-10	0.645615
FLVCR2	2.52528e-07	2.05798	FAM85A	0.000813412	0.269692
FMO2	0.01895	2.89264	FAM89A	5.5296e-05	0.421037
FMO4	0.00108935	1.64305	FANCA	7.03384e-09	0.628113
FMO5	0.0219051	1.51431	FANCD2	5.48609e-09	0.640721
FOS	0.000223279	2.97366	FANCG	9.49771e-09	0.660101
FOSL2	1.98589e-09	1.64515	FAS	2.96456e-06	0.538353
FOXD4	9.05234e-06	1.58333	FAXC	9.30171e-07	0.313751
FOXD4L3	0.0293505	1.55708	FBLN1	0.00026958	0.653111
FOXD4L4	0.0014102	4.45433	FBXO15	0.0151111	0.598216
FP15737	0.000215387	2.49376	FBXO41	9.92061e-09	0.630725
FRK	6.52917e-08	1.57146	FBXO44	3.53458e-08	0.532666
FTH1	6.23534e-13	2.39925	FBXO5	9.52139e-09	0.632129
FTH1P10	9.43901e-08	2.84447	FBXO6	4.32242e-07	0.266175
FTH1P11	1.59375e-07	3.36507	FBXW4	6.36272e-11	0.366778
FTH1P12	0.000662878	3.53942	FBXW4P1	0.0163233	0.52616
FTH1P16	0.000249541	2.87791	FCHSD2	2.02821e-05	0.655193
FTH1P2	4.42942e-07	2.98152	FEV	3.51801e-06	0.46787
FTH1P20	9.9713e-07	3.31874	FEZF1-AS1	0.00374554	0.522854
FTH1P23	3.12292e-05	3.37135	FGFR2	0.000557855	0.596443
FTH1P3	3.96938e-05	3.39395	FGFR3	1.39741e-06	0.655204
FTH1P5	0.031532	1.90448	FGFRL1	4.87998e-12	0.498414
FTH1P7	1.65837e-06	3.76283	FHOD3	0.0155658	0.508032
FTH1P8	2.35793e-06	3.07219	FKBP9	2.29527e-10	0.456769
FTL	9.53868e-11	1.85944	FOXD2	0.00127924	0.54558
FTLP3	0.00126334	2.27999	FOXD2-AS1	7.16324e-05	0.410425
FXYD3	5.49292e-08	1.6641	FOXF2	0.0370821	0.265835
G6PD	3.00622e-09	1.58229	FOXJ2	5.08037e-09	0.537331
GAB2	0.000133557	1.58898	FOXM1	4.88178e-11	0.616413
GABARAP	6.80062e-10	1.59427	FRMPD2	0.000453967	0.625818
GABARAPL1	5.07267e-09	1.64859	FSCN2	0.000324372	0.528704
GADD45A	3.45844e-06	1.64252	FURIN	2.05987e-09	0.389352
GAGE2C	0.00043014	1.79623	FUT5	0.0285141	0.256895
GALNT4	2.75401e-05	1.50438	FZD6	6.09928e-11	0.481277
GAN	3.57774e-07	1.52278	FZD8	0.00167604	0.666035
GAPDHP1	0.00120964	1.64281	GABBR1	7.70203e-07	0.382842
GAPDHP21	0.0227689	2.8521	GALNT16	0.0328262	0.559326
GAPDHP40	0.00267248	2.20301	GAREML	8.94242e-08	0.290822
GAPDHP61	0.0422441	1.7904	GAS1	0.00204642	0.437519
GBP2	0.012126	1.51398	GAS2L1	6.85635e-10	0.600037
GCM1	5.11529e-07	3.3188	GAS6	1.48128e-05	0.593976
GDF15	4.31112e-12	4.20441	GBAS	9.07365e-11	0.547679
GJB1	0.0199942	1.95281	GFPT2	0.00484367	0.547739
GJB2	0.000626629	1.762	GINS2	2.1376e-08	0.629359
GLYCTK	0.00161837	1.51368	GJB6	0.00446019	0.326644
GMCL1P1	0.0284912	2.55269	GJC1	0.00406382	0.56657
GOT2P2	0.0358564	1.63708	GKAP1	0.00605946	0.650567
GPD1	0.00288542	1.8836	GLTPD2	0.00370211	0.375827
GPNMB	2.67522e-09	3.00646	GNAQP1	6.51731e-05	0.439537
GPR115	0.0293764	3.71983	GNAZ	8.21838e-10	0.405573
GPR137B	7.04757e-07	1.6718	GNB1L	6.00804e-06	0.548397
GPR68	0.0367646	1.7001	GNB3	0.0431671	0.571578
GPRC5A	8.34768e-05	3.02476	GNG4	3.46549e-06	0.451138
GRAMD1C	1.26027e-06	2.01848	GOLGA6L3	0.0428119	0.322139
GRB14	0.000225491	1.60555	GOLGA8Q	0.0120337	0.196072
GRIK2	0.00232677	1.56984	GPD2	1.02303e-08	0.660998
GSN	1.8396e-06	1.58307	GPR124	0.0116855	0.454575
GSTA1	1.55345e-06	1.69764	GPR125	1.48824e-07	0.618452
GTF2B	2.1626e-08	1.52706	GPR153	6.49796e-05	0.358358
GUCA1B	0.0290074	2.36269	GPR156	9.96579e-05	0.644594
GUCY1B2	0.0244833	2.70519	GPR157	1.70893e-07	0.660895
H2BFS	0.0353971	1.76171	GPR161	6.83041e-08	0.336992
H3F3AP6	0.00710606	1.89671	GPR180	1.80706e-09	0.626134
H3F3BP1	0.0340099	2.35892	GPR19	0.00518754	0.497777
H3F3C	0.0324584	1.74326	GPR27	0.0206371	0.572821
HBA1	0.039559	2.84703	GPR98	5.25428e-05	0.620547
HBP1	2.82842e-10	1.78531	GPSM2	1.34543e-08	0.655644
HEPH	0.0161067	2.2362	GRAMD1A	6.1577e-08	0.656975
HIST1H1E	0.00269154	1.64616	GREB1L	1.02982e-06	0.561835
HIST1H2BD	5.29934e-07	1.53987	GRIP1	0.0285395	0.522722
HIST1H2BE	0.00813051	2.88949	GRK1	3.95924e-08	0.655052
HIST1H3E	0.00211619	2.03243	GRK6	1.39952e-09	0.603914
HIST1H4E	0.0062669	1.6032	GRPR	0.00219435	0.450911
HIST1H4H	6.70204e-08	1.65116	GS1-179L18.1	0.000226697	0.520238
HIST1H4J	0.00452552	1.99691	GS1-393G12.14	0.0368917	0.550258
HIST2H2AA4	4.38911e-08	1.83769	GSC	1.79741e-06	0.496433
HIST2H2BE	9.07365e-11	2.11097	GTSE1	1.07621e-10	0.50238
HIST4H4	0.000125768	1.83293	H2AFX	6.36272e-11	0.526099
HLA-DMA	0.0017775	1.65033	H2AFY2	0.00068713	0.617698
HLA-DQB1	1.37077e-05	2.43573	H6PD	5.76333e-10	0.614574
HMGB1P26	0.0207131	3.35511	HACE1	9.75501e-07	0.521857
HMGCS1	6.36272e-11	1.64087	HAGH	1.22744e-09	0.575559
HMGCS2	8.00384e-06	1.5735	HAUS6P1	0.0111316	0.636454
HMOX1	5.92507e-13	9.13081	HAUS8	4.89763e-08	0.640567
HNRNPA1P12	0.0176703	1.84053	HDAC11	1.81249e-07	0.513367
HNRNPA1P54	0.0471709	1.66859	HDAC4	5.24727e-05	0.645866
HNRNPKP1	0.014841	1.92114	HDGFRP3	1.24325e-07	0.492959
HOTAIRM1	0.00410016	1.75599	HEY1	0.00112134	0.603814
HOXA1	0.00259685	1.80287	HGSNAT	7.76637e-10	0.524966
HPSE2	0.0300225	3.06428	HIRIP3	9.07365e-11	0.520668
HSD17B11	6.6369e-08	1.81477	HIST1H4C	0.00419392	0.461637
HSD17B14	0.000949116	2.21485	HIST2H3C	0.00310513	0.593202
HSD17B7P2	0.000235461	1.59232	HMGN2P5	3.22805e-05	0.501806
HSPA8P1	0.0248474	1.55154	HMX1	9.38514e-05	0.605108
HSPA8P8	0.0162809	1.57147	HNF4G	2.20364e-06	0.341919
HSPB8	0.000268722	2.37086	HOTTIP	0.0283682	0.300919
HSPD1P2	0.0393823	2.16842	HOXA-AS3	0.000826055	0.478184
HTR2C	0.000202801	1.67806	HOXA13	0.000136002	0.631598
IDI2-AS1	0.040773	1.5848	HOXA3	0.000537596	0.379683
IFI27	0.0497153	1.50638	HOXA4	0.000614476	0.554626
IFIT1	3.96938e-05	2.53521	HOXA5	6.28831e-05	0.567892
IFIT2	2.32253e-07	3.88543	HOXA6	0.00324238	0.55445
IFIT3	0.00589809	1.94086	HOXC4	0.000867162	0.433859
IGBP1	3.5085e-07	1.56235	HRCT1	0.0327996	0.316358
IGFBP3	6.9951e-09	1.72456	HS6ST1P1	0.000857531	0.627908
IKBKE	0.000287132	1.54108	HSF2	3.33513e-06	0.658782
IKZF2	0.000886186	1.57808	HSPA12A	4.02974e-06	0.490954
IL12RB2	0.0225844	1.60008	HSPG2	1.23637e-08	0.47916
IL20RB	0.00960524	1.68197	HTR3A	1.04495e-05	0.600686
IL8	0.000423983	5.88871	HTRA1	0.0442063	0.576016
IL9R	0.0123349	1.50046	HUNK	0.0279665	0.467037
IMPG2	0.0112614	3.50076	IAH1	5.06016e-07	0.651789
INO80C	2.62129e-06	1.64953	ICA1L	0.00144275	0.434667
IPCEF1	0.0188392	1.5199	ICMT	4.14364e-10	0.660416
IQUB	0.00418082	2.82902	ID1	1.00622e-09	0.580588
IRAK2	0.000993536	1.64582	IDH3A	5.95423e-10	0.565935
IRF1	0.000184579	1.66226	IDNK	5.71838e-05	0.479124
IRF7	1.73359e-07	1.71818	IDS	1.30473e-08	0.626159
ITGA1	0.0105621	1.59156	IFFO2	9.04215e-07	0.578414
ITGA3	1.04569e-05	1.7769	IFIT5	5.6423e-06	0.303782
ITPR1	1.0298e-06	1.75043	IGF2BP3	1.61042e-08	0.591443
IYD	7.04155e-06	1.69405	IGSF8	1.71914e-07	0.615564
JAM2	0.0030607	2.55392	IL12A	0.0195145	0.445932
JARID2	6.1577e-08	1.50428	IL17D	3.48055e-07	0.51141
JUN	9.83091e-11	1.85898	IL17RD	0.000114403	0.622439
KB-1471A8.1	0.0128764	1.74379	IL20RA	0.000393872	0.504059
KCNE4	0.0124705	3.90049	IL22RA1	0.000543316	0.358724
KCNJ14	1.25554e-05	1.74828	IL27RA	0.0108383	0.614202
KCNN1	0.0231996	1.60149	IMPAD1	2.29527e-10	0.640296
KCNN2	3.36745e-08	1.59591	INPP5E	2.22943e-08	0.505458
KDELC2	0.00431658	1.74033	INPP5F	2.78005e-09	0.416397
KDM1B	3.5695e-09	1.51057	INSR	1.65634e-07	0.656592
KDM5B	2.91002e-09	1.6061	INVS	2.198e-07	0.405315
KDM8	0.00615176	1.50766	IPP	5.20792e-07	0.647901
KLF7	1.3297e-08	1.50414	IQGAP3	5.26988e-09	0.655936
KLHL24	4.02099e-10	2.10496	IRF2	5.74679e-06	0.605863
KLHL28	1.51027e-10	1.87491	IRF5	9.33114e-07	0.537921
KLRAP1	0.000393768	1.8117	IRX2	7.81241e-08	0.324482
KPNA5	1.80287e-07	1.57303	ITPKA	0.0400869	0.477616
KRT18P10	0.0235672	2.37484	ITPRIPL2	1.02043e-06	0.585982
KRT6C	0.0278991	1.97195	JOSD1	1.74804e-10	0.570627
KRT75	0.0404453	2.71041	KANK1	0.000290489	0.656941
KRT8P36	0.0443019	1.88457	KAT6A	5.74488e-08	0.643843
LAMB3	0.00248698	2.10723	KATNBL1	2.77971e-09	0.470327
LAMC2	1.50204e-08	5.56624	KATNBL1P6	0.00114154	0.399105
LATS2	3.85975e-09	1.61494	KAZALD1	1.82529e-07	0.647511
LGALS8	6.54281e-10	1.72501	KB-1460A1.1	0.0280792	0.31296
LIG4	1.58779e-07	1.52703	KB-1507C5.2	0.0103952	0.350363
LINC00324	0.0014898	2.13919	KB-1732A1.1	0.00685615	0.651473
LINC00511	0.00148153	1.85789	KCNAB2	9.75542e-10	0.355299
LINC00672	0.0219051	2.15792	KCNG1	0.0199888	0.492573
LINC00691	0.00480258	3.66517	KCNH2	0.00967252	0.622791
LINC00853	0.0366171	1.63341	KCNIP3	0.000967007	0.550475
LINC00930	7.19873e-07	1.8816	KCNJ12	0.000819965	0.479059
LINC00942	0.0269797	2.80971	KCNQ1	9.93613e-06	0.412953
LINC00992	0.0109031	1.92677	KCNQ2	5.3389e-07	0.63379
LIPH	3.69281e-05	2.34805	KCNQ4	1.82893e-06	0.617721
LIPT1	1.17772e-05	1.77755	KCTD18	3.89023e-07	0.627431
LMO7	0.00024724	1.52304	KCTD9P2	0.0246666	0.552563
LPCAT2	0.00490699	1.72823	KDELC1	4.9801e-07	0.620986
LPXN	8.46212e-05	1.50967	KDM3B	4.38374e-11	0.554596
LRIT3	0.00577163	2.66708	KIAA0319	0.0482144	0.567784
LRP4	0.00384801	1.76709	KIAA0753	8.78693e-07	0.644242
LRRC39	1.08517e-06	2.29673	KIAA0825	0.0193034	0.527414
LRRIQ1	0.0037003	1.51099	KIAA0895	6.1577e-08	0.39074
LRRN3	0.0348862	2.41664	KIAA1549	3.79692e-10	0.551444
LSMEM1	5.47511e-08	2.78521	KIAA1551	1.36645e-08	0.562328
LYG1	0.0147536	1.60465	KIAA1715	9.59902e-09	0.65729
LYPD3	0.00240881	1.9196	KIAA2022	0.000532936	0.267495
MAFF	0.0006088	1.82638	KIF11	7.58893e-08	0.632598
MAGEA2	3.71653e-06	1.52243	KIF14	3.66927e-10	0.564592
MAGEC2	0.0492325	2.21135	KIF15	1.90901e-07	0.625446
MALAT1	5.55196e-12	1.80514	KIF18B	3.25801e-09	0.624194
MAP1B	2.88647e-08	1.68689	KIF20A	2.98279e-11	0.570477
MAP1LC3B2	0.0366085	1.95359	KIF20B	1.12092e-09	0.640223
MAPT	4.22267e-06	1.50691	KIF23	6.82355e-10	0.597134
MB21D2	4.61436e-05	3.90524	KIF24	2.72587e-09	0.497541
MBL1P	0.00394124	1.8959	KIF26A	1.16979e-06	0.350863
MBOAT4	0.0273692	2.66066	KIF2C	3.28134e-10	0.559911
MCF2L2	0.00145501	2.81956	KIF7	3.63634e-05	0.516728
MDH1B	0.00140573	1.60902	KIFC1	6.04699e-10	0.596973
ME1	4.5692e-10	1.54334	KLHDC9	2.97823e-07	0.416557
MED12L	8.26518e-06	1.71234	KLHL22	2.41791e-10	0.374575
MEF2C	0.0310151	1.8871	KLHL42	1.78943e-10	0.567998
MIP	0.049815	1.82968	KLHL5	4.9173e-06	0.594989
MIR22HG	9.59065e-09	1.94533	KRBA1	0.000646193	0.584907
MIR4426	0.0111157	1.52247	KRCC1	1.38321e-06	0.469647
MIR4461	0.0228809	1.60342	KRT18P59	0.018746	0.506781
MIR4523	0.027133	2.36468	L34079.4	0.0297623	0.317223
MKLN1-AS2	1.33729e-05	1.58363	LA16c-380H5.5	4.35729e-05	0.297803
MMP12	0.0283751	2.17441	LARGE	0.00161426	0.604864
MMP13	0.000505124	1.86488	LARP6	0.000280242	0.569869
MOSPD2	8.72694e-09	1.63839	LDB3	0.00749335	0.293444
MPZ	0.0129371	2.74454	LEMD2	6.43239e-11	0.481622
MRPS21P1	0.0316066	1.97583	LEPRE1	7.56788e-08	0.570085
MSMO1	6.67428e-08	1.50685	LIG3	1.04356e-08	0.628163
MSTN	0.00143456	5.47174	LIMD2	0.011039	0.608931
MT-RNR1	2.13355e-12	1.84999	LIMS1	2.32907e-09	0.625011
MTATP6P1	0.00821556	1.66715	LINC00086	2.34174e-07	0.503444
MTHFR	1.86532e-09	1.70934	LINC00552	0.0308832	0.457136
MTND2P28	0.011608	1.53629	LINC00634	0.00197926	0.600173
MTND4P12	0.028998	1.5617	LINC00638	0.0250581	0.558214
MTND5P10	0.0406116	2.86229	LINC00863	0.00317356	0.634118
MTND5P11	0.00147805	1.70866	LINGO1	0.000883473	0.3995
MTND6P4	0.00584419	1.83606	LIPT2	0.00048054	0.529166
MTRNR2L1	0.00396589	2.17506	LMF2	7.20772e-08	0.656469
MTRNR2L10	0.000388552	2.12087	LMNB1	2.75692e-10	0.626264
MTRNR2L12	2.90653e-05	2.46538	LONRF1	2.40499e-12	0.35569
MTRNR2L2	0.00340142	1.93563	LONRF2	0.00098392	0.547669
MTRNR2L6	0.00154043	2.47586	LOXL1	0.000176971	0.423385
MTRNR2L8	9.26081e-05	2.31069	LOXL1-AS1	4.2208e-06	0.475447
MUC5AC	1.30015e-06	1.58665	LPCAT1	2.00431e-12	0.381431
MUC5B	0.0473249	1.65183	LPGAT1	7.90543e-12	0.380501
MUC6	0.00021318	1.60861	LRFN3	4.44104e-06	0.632643
MXI1	4.43619e-09	1.68228	LRP11	1.22744e-09	0.544727
N4BP2L1	2.00354e-07	2.87845	LRP3	4.92627e-10	0.55425
NABP1	5.56962e-10	1.70432	LRP5	8.55713e-11	0.564243
NANOGNBP3	0.0359081	2.20334	LRRC10B	0.000136244	0.245805
NAP1L2	2.2454e-07	1.6928	LRRC32	0.000698077	0.401501
NAT2	0.00633193	3.74596	LRRC37A9P	2.12203e-05	0.475742
NCEH1	2.0135e-08	1.54833	LRRC41	1.9191e-11	0.401712
NCKAP5	0.0155175	1.79213	LRRC45	7.05423e-09	0.637139
NCKAP5L	0.000900525	1.62074	LRRC73	0.00157115	0.463008
NCR3LG1	3.27137e-07	1.57363	LTBP1	0.000259233	0.563351
NEB	5.96075e-05	1.8006	LTBP2	0.000218283	0.590316
NEFL	0.0018003	1.69773	LYNX1	6.77871e-07	0.593332
NEU1	6.36272e-11	2.19182	LYPD6	0.0088232	0.563136
NEURL3	0.00468712	2.87554	LYRM9	9.04796e-05	0.330354
NFIL3	1.11822e-05	1.50132	LZTS1	0.012599	0.54763
NHP2P1	0.0219371	1.79821	MAD2L1	2.75692e-10	0.555678
NLRC4	0.00650113	2.28659	MAFG-AS1	0.000149496	0.654016
NME2	1.58132e-05	1.53878	MAGEE1	1.22348e-08	0.375322
NME2P1	0.0052035	1.87671	MAGEF1	1.52206e-10	0.600206
NMNAT2	5.12023e-06	1.68349	MAGI2	7.03988e-06	0.290686
NNAT	0.0471709	1.52454	MALSU1	3.14677e-08	0.665913
NNMT	6.78695e-08	1.76428	MAMDC2-AS1	0.0178271	0.393452
NOS2P3	0.0393823	2.29387	MAML1	5.97004e-10	0.599044
NOS3	6.82313e-06	1.83057	MAN1C1	0.00458986	0.560485
NPAS1	2.27564e-05	3.13995	MAN2A2	4.14364e-10	0.535094
NPC1	2.47879e-10	1.60854	MANEAL	8.72694e-09	0.591251
NPIPB6	2.18846e-05	1.66638	MAP1A	0.00322668	0.56562
NPIPB9	0.000903824	1.73606	MAP4K1	0.00583254	0.56203
NPM1P12	0.0025485	2.26885	MAP4K4	2.04399e-10	0.596667
NPM1P18	0.00257283	3.31089	MAPK4	0.0448107	0.418008
NPM1P21	0.0311897	1.88184	MAPK9	9.33964e-10	0.558445
NPM1P8	0.00138435	3.67548	MARVELD1	1.3041e-09	0.622948
NPY1R	0.000768372	2.3557	MAST2	8.67561e-09	0.615437
NQO1	4.31112e-12	1.99764	MAVS	1.00604e-07	0.615662
NR1D1	5.28684e-07	1.81878	MBOAT1	0.00308014	0.488826
NR1D2	2.27707e-09	1.5215	MCM10	2.82085e-09	0.659631
NR6A1	8.81846e-06	1.66337	MCM3	2.46e-10	0.58862
NSF	3.47551e-10	1.54882	MCMBP	6.91032e-10	0.650992
NSUN3	3.99344e-06	1.59298	MDC1	1.14662e-10	0.647779
OAS1	0.033561	1.80734	MDGA1	2.96066e-06	0.332499
OASL	0.000964288	2.60081	MDK	1.05844e-07	0.591521
OPTN	4.06325e-07	2.01039	ME2	4.20815e-09	0.617174
ORAI3	5.04117e-06	1.77221	MED30	2.72157e-07	0.442273
OSGIN1	5.9597e-06	1.59067	MESP1	1.50555e-07	0.588011
OTUB2	3.46061e-07	1.73003	MESP2	1.99394e-05	0.5528
OVGP1	6.08018e-06	1.51208	MEX3D	3.50604e-08	0.626211
OXSM	7.07944e-08	1.51328	MFI2	0.000975677	0.595545
P4HA3	0.00130185	1.56438	MFI2-AS1	7.0846e-05	0.422118
PABPC1P1	0.042668	2.19746	MFSD11	1.11991e-07	0.635378
PAK1	0.0119414	1.79012	MFSD2A	5.9936e-08	0.419415
PAPSS2	0.00291196	2.10716	MICALCL	0.00937688	0.491186
PARD3	0.00111617	1.50393	MID2	4.36814e-07	0.574628
PARK2	0.0207237	3.09525	MKI67	2.12075e-11	0.535851
PARP4P2	0.0243609	2.48101	MLH3	3.7946e-10	0.546612
PARP6	0.0483806	2.04104	MLK4	3.00113e-09	0.501382
PATE3	0.0283281	2.39035	MLTK	5.48609e-09	0.542131
PBXIP1	3.36665e-08	1.7685	MMP11	1.48643e-06	0.436376
PCAT1	1.08638e-05	1.74252	MMP25	0.0234031	0.587609
PDE4C	0.00333274	1.84962	MND1	2.61443e-05	0.603556
PDK4	0.00773047	2.90455	MNX1	1.17683e-05	0.569595
PDZK1	0.030521	2.14256	MNX1-AS1	9.62838e-06	0.637192
PEAR1	0.02339	2.29261	MOB1A	2.61626e-11	0.464702
PEBP1P2	0.049389	2.0584	MOCOS	1.80414e-08	0.555865
PELI2	1.77252e-05	2.2352	MORC4	1.10514e-09	0.543447
PEX11B	2.94457e-07	1.5354	MREG	0.000155551	0.59565
PEX7	0.000181958	1.52094	MRPL45	9.10385e-09	0.661922
PFKFB2	8.31652e-10	1.58357	MSANTD3	1.44031e-08	0.492317
PGM2L1	5.89715e-09	2.88711	MSH5	2.19941e-06	0.650572
PGM5	0.000435396	3.5867	MSH6	6.25309e-10	0.62002
PGPEP1	6.87554e-10	1.60544	MSI1	0.0378383	0.486343
PHEX	0.0403651	1.56635	MST1P2	0.029149	0.545374
PHKG1	0.0270183	1.61361	MSX1	1.90029e-05	0.563893
PHOSPHO1	0.00156005	1.70197	MTDH	4.1554e-11	0.622153
PIK3IP1	7.99619e-05	2.16964	MTERFD1	4.64321e-08	0.626926
PIN4	1.73102e-05	1.50504	MTERFD3	1.00604e-07	0.570967
PIP	0.000166461	1.95919	MURC	0.000672831	0.118427
PIP4K2C	4.36045e-10	1.59965	MVB12B	2.76195e-10	0.193764
PKHD1L1	0.00458986	1.58263	MX1	0.000545634	0.548595
PLA2G4C	0.000773171	3.92675	MXD3	5.47511e-08	0.609744
PLAC8L1	0.0126121	2.59715	MYBL1	2.34027e-07	0.616396
PLCG2	0.000924478	1.89141	MYBL2	7.90543e-12	0.554068
PLEKHB2	1.10271e-10	1.53799	MYH10	2.12075e-11	0.532595
PLGLB2	0.017987	2.09269	MYH9	2.11489e-10	0.640994
PLK2	4.84256e-08	1.78678	N6AMT2	0.000444434	0.66297
PLXNA2	0.045815	1.76778	NAA60	7.82697e-10	0.571329
PNRC1	1.87732e-07	1.63331	NAE1	9.07365e-11	0.51079
PPAN-P2RY11	0.044525	1.95606	NAGA	1.01773e-09	0.578985
PPIAP11	0.0436579	1.69333	NAT8L	1.95928e-05	0.492739
PPIAP19	0.0183542	1.78739	NAV2	3.43936e-06	0.391842
PPIAP31	0.00718637	1.69772	NBPF3	0.00381773	0.631665
PPP1R15A	4.67701e-07	2.12247	NCAPG	1.00931e-09	0.616917
PPP2R5B	1.59891e-07	1.77953	NCAPH	3.24293e-09	0.630013
PPP3R2	0.00686487	1.91249	NCK2	9.71532e-08	0.502651
PRICKLE2	0.00982427	1.56769	NCS1	3.19188e-10	0.613695
PRKCH	2.21706e-08	1.62275	NDN	2.06402e-08	0.666038
PRKG2	0.0120243	2.62018	NDNL2	4.55353e-09	0.564968
PSORS1C1	2.63273e-05	5.20024	NEDD1	3.52606e-08	0.655385
PTGDR2	0.0371651	1.95939	NEIL3	1.55596e-06	0.540972
PTGR1	7.74459e-13	3.16479	NEK2	3.26039e-09	0.653003
PTPRB	0.000166758	1.79029	NEK4	7.06306e-08	0.649542
PUS10	1.21558e-05	1.56129	NES	1.25881e-11	0.411347
PVRL4	3.94668e-06	1.55048	NEURL1B	6.1577e-08	0.625009
PYCARD	0.0445236	2.78924	NFYB	5.30701e-08	0.663058
RAB30	1.10713e-07	1.5701	NKD1	5.23908e-05	0.470434
RAB40A	0.00383139	1.95385	NMNAT3	0.0185997	0.584258
RAB4B	0.000142674	1.52123	NNT	4.58054e-07	0.66294
RAD21-AS1	0.000122171	2.30157	NNT-AS1	5.11529e-07	0.491453
RAET1L	0.0454146	2.17675	NOD2	0.0397653	0.664941
RANBP6	7.44734e-10	1.55236	NOTUM	0.028413	0.384479
RARRES3	0.0375703	1.66773	NPAS2	2.66178e-07	0.481042
RASA4CP	0.04901	1.57054	NPEPL1	2.05264e-08	0.663175
RASD1	0.000154814	2.07782	NPIPA1	3.51215e-08	0.613837
RCAN2	0.000214724	1.74777	NPIPA3	0.0163872	0.581196
RDH11	3.84762e-11	1.60569	NPIPA5	5.02292e-05	0.647083
RELB	0.0129406	1.51062	NPIPA8	0.0271366	0.659256
RFPL1S	0.0059267	2.00806	NPIPP1	3.54222e-05	0.615143
RFPL3S	0.00333786	3.38384	NPTX2	4.36706e-07	0.555329
RGMB-AS1	0.000615313	1.62293	NPTXR	1.95807e-07	0.506951
RHEBL1	0.0104943	2.3354	NREP	8.96774e-08	0.666187
RIMKLBP2	0.0185496	1.60554	NRF1	3.59382e-08	0.5268
RINL	0.0158621	1.92158	NSMAF	4.98435e-10	0.58699
RIPK4	2.41764e-07	1.57741	NT5C3B	4.98435e-10	0.606143
RMDN2	0.0232311	1.6955	NT5M	4.12383e-05	0.585737
RMRP	0.00325265	3.01834	NUAK1	2.08998e-06	0.615302
RN7SK	0.000123361	2.12574	NUAK2	1.66526e-06	0.62297
RN7SL737P	0.0279799	2.05846	NUF2	1.13611e-09	0.602602
RNA5-8SP6	7.86403e-05	1.66049	NUSAP1	2.46713e-09	0.657543
RNF144B	7.92574e-09	2.28236	NWD1	0.021722	0.646056
RP1-149A16.3	0.0462357	2.16787	OAS3	5.72128e-10	0.511947
RP1-178F15.5	0.0171049	1.84885	OAT	5.49292e-08	0.658675
RP1-182O16.1	0.0370606	2.6511	ODAM	0.00492405	0.626554
RP1-239B22.5	3.68523e-05	2.03828	OGFR	8.7034e-09	0.658219
RP1-257A7.4	0.0303537	1.56557	OGFRL1	3.52078e-11	0.466081
RP1-273G13.2	0.0270676	1.79922	OPLAH	8.63505e-09	0.489667
RP1-28H20.3	0.0138674	3.34313	OR2A20P	0.0206055	0.339208
RP1-29C18.8	0.0487974	1.97163	ORC6	9.85777e-09	0.586085
RP1-34L19.1	5.87789e-06	3.97184	OSBPL5	2.92754e-10	0.579452
RP1-83M4.2	0.0191577	1.87202	OSCP1	1.99194e-05	0.592633
RP11-1006G14.1	0.0247641	2.55516	OTUD1	2.62939e-05	0.499377
RP11-1017G21.4	0.0112368	2.69129	P2RX7	0.0280886	0.589395
RP11-1038A11.1	0.0356667	1.68528	PABPC5	0.00792354	0.56714
RP11-107P7.4	9.93143e-06	2.39475	PAG1	1.10242e-08	0.591521
RP11-109M17.1	0.00388918	1.68268	PAPD7	6.36272e-11	0.492936
RP11-10C24.1	0.040187	1.53701	PAPPA	0.0282458	0.563793
RP11-1105G2.3	0.0121624	1.83626	PAQR4	1.59493e-09	0.62326
RP11-1136G11.6	0.00763734	1.62803	PARD3B	0.000837345	0.640161
RP11-114H23.3	0.0282626	2.11575	PARN	1.84306e-08	0.621016
RP11-115L11.1	0.0496936	3.34996	PARP14	9.74395e-08	0.643714
RP11-118B13.1	0.0356738	2.2778	PARP16	5.53657e-08	0.499085
RP11-120B7.1	0.0292219	1.82008	PARP9	2.11327e-08	0.651932
RP11-12M9.3	0.00163733	2.10802	PAXIP1-AS1	7.31122e-08	0.614505
RP11-1334A24.6	0.0166411	2.23592	PBX3	4.86935e-06	0.62818
RP11-134L10.1	0.00178591	1.63813	PCDHGC3	0.000687236	0.505193
RP11-138A9.2	0.00592842	2.17326	PCDP1	0.00156684	0.396604
RP11-1391J7.1	0.0010169	1.82994	PCGF5	2.83091e-11	0.375053
RP11-151F5.2	0.0215965	2.36485	PCNX	2.16817e-10	0.486599
RP11-159C21.4	8.877e-05	1.90406	PCSK6	1.8949e-06	0.614707
RP11-159D12.2	1.69886e-10	1.95487	PDCD7	6.48701e-09	0.547613
RP11-159D12.5	0.00127494	2.57936	PDE12	4.36045e-10	0.626368
RP11-15B17.2	0.00139615	2.21176	PDE6D	6.27399e-05	0.648847
RP11-165H4.2	0.0242807	2.0001	PDIA4	3.1399e-11	0.636238
RP11-16F15.1	0.00532887	1.68633	PDX1	0.00723322	0.65322
RP11-16F15.2	0.00840447	1.89501	PDZD4	6.66625e-05	0.528607
RP11-174G6.5	2.59494e-07	1.71875	PECR	2.02939e-05	0.656999
RP11-175O19.4	5.34013e-10	1.96536	PELI3	6.45425e-11	0.310114
RP11-180C16.1	0.00138916	1.79596	PEX10	2.78005e-09	0.637236
RP11-203F10.6	0.0276587	1.82934	PFKFB1	0.0163531	0.519334
RP11-207C16.4	0.044498	3.18777	PGBD5	3.44455e-05	0.355521
RP11-20B24.4	0.0237465	1.92054	PGLYRP2	1.71032e-06	0.483179
RP11-20O24.1	0.00331804	2.44706	PHF10	7.87887e-11	0.45668
RP11-214O1.2	0.026697	1.88783	PHF2	2.58692e-09	0.594741
RP11-226L15.5	1.9042e-05	1.63871	PHF7	5.91547e-06	0.585291
RP11-234A1.1	5.10792e-05	1.64187	PHKA1P1	0.00260971	0.54596
RP11-244H18.1	0.000412408	2.94289	PHLPP2	6.61268e-10	0.468299
RP11-244J10.1	0.00205717	2.60018	PHTF1	5.5968e-06	0.54478
RP11-254B13.1	0.00420559	1.71725	PIF1	1.80287e-07	0.646698
RP11-254G11.1	0.02897	1.85546	PIGCP1	0.00188809	0.601734
RP11-259G18.1	0.0301542	1.59863	PIGX	4.1554e-11	0.494208
RP11-264B17.3	0.00015674	1.7327	PIGZ	0.0132287	0.503656
RP11-264F23.1	0.0363778	1.69722	PIM1	7.1434e-08	0.440696
RP11-268J15.5	6.72712e-06	1.89948	PKD1P1	3.29179e-09	0.509578
RP11-271K21.11	1.66769e-06	4.90641	PKD1P5	7.95155e-05	0.602168
RP11-274E7.2	0.0403532	1.53918	PKD1P6	2.51784e-06	0.610436
RP11-278C7.1	0.00754102	1.60086	PKDCC	1.95003e-05	0.513215
RP11-283C24.1	0.00285724	2.75685	PKDREJ	0.00813051	0.630887
RP11-284F21.9	0.00221935	2.14653	PKIA	0.000100633	0.576976
RP11-288H12.3	0.000235461	1.89585	PKN3	2.98232e-05	0.529445
RP11-2C24.6	0.0375488	1.9862	PKNOX2	0.00906019	0.584421
RP11-2E11.9	0.0102233	2.28762	PLA2G4D	0.0161059	0.357238
RP11-2F9.3	0.0222387	2.07027	PLA2G4E	7.45466e-05	0.498922
RP11-304L19.5	3.56615e-05	1.51838	PLAGL1	0.0032389	0.455974
RP11-305E17.6	0.0479702	1.5182	PLAUR	0.0155175	0.525697
RP11-309L24.9	0.000241416	1.59089	PLCB3	1.47353e-07	0.65036
RP11-311C24.1	3.10032e-06	1.83125	PLEK2	4.39962e-05	0.601474
RP11-314A20.1	0.00195165	1.94088	PLEKHO1	0.000372919	0.614617
RP11-318C24.1	0.0308255	2.54082	PLK1	8.31652e-10	0.664168
RP11-320M16.1	0.0436468	1.67519	PLK3	3.49047e-06	0.577204
RP11-321E8.1	0.00445454	2.00922	PLK4	2.43435e-09	0.497671
RP11-326A19.5	1.13719e-06	3.71416	PLXNA1	1.15091e-08	0.634102
RP11-326F20.5	0.00615185	1.76303	PLXND1	1.24884e-05	0.457001
RP11-330L19.1	0.0277501	2.13486	POLA2	6.68489e-09	0.579721
RP11-339B21.11	0.0290181	1.74252	POLE	6.01393e-09	0.641519
RP11-33B1.4	0.0336138	1.53028	POLQ	3.78948e-10	0.586533
RP11-342K6.4	0.0226815	2.43153	POMGNT1	7.85216e-13	0.310345
RP11-345K20.2	0.0174741	2.11593	POU5F1	0.000875162	0.601579
RP11-348P10.2	0.000723464	1.70995	PPP1R14C	0.00227416	0.579807
RP11-34P1.2	0.0355085	1.87878	PPP1R26-AS1	0.000211527	0.5678
RP11-352E6.2	0.00488	3.15954	PPP1R3E	8.23606e-07	0.645584
RP11-353B9.1	0.000239909	2.15661	PPP1R3F	2.89808e-06	0.561005
RP11-353N4.6	0.0236478	2.31249	PPP1R9A	5.35335e-06	0.537363
RP11-356J5.12	0.0264491	2.17648	PPP2R2C	2.77191e-08	0.410798
RP11-356M20.2	0.0355916	2.3706	PPP2R3B	0.000553528	0.655885
RP11-360D2.2	0.0193698	2.62862	PPP4R1	1.24981e-09	0.624798
RP11-360L9.7	0.0319135	6.05637	PRAC1	9.44874e-06	0.643381
RP11-361K17.2	0.0304034	1.57957	PRIMA1	0.0119125	0.55265
RP11-363E7.4	3.1633e-09	2.04099	PRIMPOL	7.74639e-07	0.626948
RP11-364L4.1	0.0347087	1.78866	PRKAR2B	2.15709e-08	0.619962
RP11-366M4.17	0.0105799	3.53471	PRNP	8.35093e-10	0.61811
RP11-373D23.3	0.0181954	3.12773	PRR11	6.35806e-10	0.625407
RP11-373L24.1	0.00347668	1.79437	PRRG4	1.80706e-09	0.643517
RP11-379F4.4	0.000252934	1.92313	PRRT4	0.0396802	0.456955
RP11-379F4.8	0.00964361	1.8815	PSRC1	1.12942e-09	0.504129
RP11-379K17.12	0.00109104	2.48369	PTBP3	9.67985e-10	0.620764
RP11-380M21.2	0.0026661	2.21128	PTGFRN	1.09641e-09	0.663002
RP11-385D13.1	0.00176969	1.99261	PTGS1	6.86189e-05	0.483684
RP11-385F5.5	0.0487927	1.63753	PTPN9	2.90569e-08	0.600388
RP11-386I14.4	0.00332208	2.48326	PTPRE	0.0008269	0.664402
RP11-388P9.2	3.57534e-05	1.74542	PTS	1.04557e-09	0.579378
RP11-391L3.1	0.0104721	4.17764	PXDN	2.24038e-08	0.457242
RP11-392E22.10	0.0278367	1.87696	PXK	9.27409e-05	0.666264
RP11-392P7.1	0.00439063	2.05863	PYGO1	2.94368e-09	0.545142
RP11-393I23.2	0.0344729	2.4017	QSER1	1.5099e-09	0.612641
RP11-395P17.11	0.0086292	1.9637	R3HDM2	9.01188e-10	0.566626
RP11-397A16.2	0.0411902	1.59642	RAB11FIP2	1.22744e-09	0.505209
RP11-397E7.4	0.0400983	2.13275	RAB11FIP3	6.69856e-10	0.528826
RP11-397G5.2	8.36624e-05	2.53619	RAB36	1.51373e-08	0.394164
RP11-408A13.4	0.0212648	2.24068	RAB39B	0.0186804	0.647487
RP11-40C6.2	0.00451899	2.29808	RAD51	1.50056e-06	0.663664
RP11-413E6.1	0.0198405	2.7669	RAD54B	3.1253e-07	0.588293
RP11-416K24.2	0.0187676	2.23382	RAD54L	4.46801e-11	0.456194
RP11-419L20.2	0.0306578	2.10624	RAI14	6.87554e-10	0.622665
RP11-421E14.2	0.00321685	1.98163	RALGPS2	3.4333e-06	0.633395
RP11-421N8.1	0.00144523	1.83063	RAPGEF1	3.04002e-11	0.434765
RP11-425I13.1	0.0204799	2.0501	RARRES2	0.0408268	0.614423
RP11-428J1.4	0.031932	1.82068	RASA3	2.01301e-08	0.607102
RP11-428J1.5	0.0326096	1.54032	RASGEF1B	0.0292208	0.32583
RP11-429J17.8	0.0260417	2.64983	RAVER2	2.23083e-07	0.617668
RP11-434O22.1	0.00209963	2.52565	RBL1	7.66943e-08	0.650138
RP11-435F17.1	0.0102538	1.85209	RBP7	0.0125669	0.309595
RP11-435O5.2	5.92341e-05	1.51468	RBPMS2	6.46022e-10	0.436043
RP11-438L7.3	0.0285731	1.53924	RDH14	8.37137e-07	0.590438
RP11-438N16.1	0.0038054	2.03321	RDH5	0.0443542	0.589756
RP11-443P15.2	0.000916762	2.34795	RDM1	2.2047e-05	0.594035
RP11-448G4.2	0.00447965	2.55715	RECQL4	1.00622e-09	0.634446
RP11-450D21.1	0.0388675	2.16941	RELT	2.02755e-06	0.575583
RP11-456H18.2	0.0148539	1.70883	RFXAP	1.86153e-07	0.532466
RP11-456P18.2	0.00376792	3.0921	RGAG4	1.03113e-05	0.582623
RP11-467H10.1	0.0107983	1.78889	RGMA	0.000278283	0.437732
RP11-475C16.1	0.00024724	1.65445	RGPD2	2.25441e-06	0.511756
RP11-475I24.3	0.00181281	1.58289	RGPD5	4.93935e-06	0.602861
RP11-477D19.2	0.000295479	1.75675	RGPD8	0.000820123	0.567786
RP11-478C6.4	0.0435623	2.01731	RGS11	3.14899e-06	0.346466
RP11-47I22.3	0.0223859	2.06385	RGS12	1.47926e-06	0.577779
RP11-480I12.2	0.0348083	2.31727	RHBG	0.0435668	0.602934
RP11-483C6.1	0.034053	2.28424	RHNO1	2.97028e-08	0.621979
RP11-48B14.1	0.00865118	2.02683	RHPN1-AS1	0.00401143	0.660978
RP11-48B3.3	4.08341e-07	1.93005	RILPL1	1.14658e-06	0.570827
RP11-48B3.4	8.6749e-09	2.18893	RIMBP3C	0.0106431	0.565371
RP11-490G8.1	0.012841	1.78154	RLN2	0.0289021	0.565077
RP11-497H16.7	0.019965	1.72909	RMI2	4.5097e-09	0.446251
RP11-49C24.1	0.00322829	1.99967	RNF135	4.90996e-06	0.654089
RP11-507E23.1	0.0101554	1.88515	RNF141	2.49764e-09	0.600625
RP11-50D9.1	0.00534141	2.1321	RNF167	2.35616e-09	0.649479
RP11-50E11.2	0.0471525	2.14924	RNF208	2.07888e-06	0.550032
RP11-511H9.4	0.0450526	1.73491	RNF8	7.09224e-07	0.63121
RP11-512M8.5	0.00144532	1.73621	RP1-140A9.1	0.0451932	0.570952
RP11-513I15.6	0.00155707	2.92581	RP1-43E13.2	0.0473191	0.318457
RP11-514P8.8	0.00877426	2.31131	RP1-90G24.10	0.00950139	0.660046
RP11-51J9.6	0.0123963	2.00829	RP11-1055B8.6	0.000864849	0.378433
RP11-51O6.1	8.40569e-05	1.60017	RP11-1055B8.7	2.01971e-10	0.426912
RP11-521J5.1	0.0224546	2.02952	RP11-108L7.15	0.01866	0.661618
RP11-526I2.5	0.00751099	1.5046	RP11-1100L3.8	0.00809907	0.296027
RP11-532M24.1	0.0085515	2.74339	RP11-110I1.12	9.90184e-05	0.628505
RP11-536C5.7	0.0318746	1.58164	RP11-1136G11.8	0.0061547	0.310677
RP11-543B16.1	0.0419534	1.64092	RP11-1186N24.5	0.000135408	0.529036
RP11-543P15.1	0.00154939	1.67785	RP11-1212A22.1	3.23884e-08	0.565107
RP11-548O1.3	0.0408275	2.17168	RP11-1212A22.4	8.29041e-06	0.656299
RP11-54O7.10	0.0154405	2.21742	RP11-1252I4.2	0.0236979	0.336325
RP11-54O7.18	0.0140065	2.93775	RP11-1275H24.1	0.00125835	0.657995
RP11-553L6.5	0.00193763	1.86852	RP11-1275H24.3	0.0079688	0.552988
RP11-553P9.1	0.00327587	1.83456	RP11-1277A3.2	0.00174947	0.406764
RP11-554J4.1	0.00372539	2.08026	RP11-12A20.2	0.0445141	0.40778
RP11-556K13.1	0.0156237	1.64909	RP11-1415C14.3	0.0233815	0.611715
RP11-561O23.5	0.00467259	2.22931	RP11-159N11.4	0.0370606	0.543008
RP11-563H6.1	0.0279227	2.22662	RP11-160O5.1	0.00018414	0.431363
RP11-563N4.1	1.73281e-05	2.04331	RP11-163E9.2	0.00834185	0.321521
RP11-574K11.29	0.00984036	1.50299	RP11-196G18.23	5.8625e-06	0.624303
RP11-575L7.8	0.0275899	1.58776	RP11-212P7.2	3.44105e-08	0.605905
RP11-587D21.1	0.00571206	2.13096	RP11-229P13.20	0.019637	0.559953
RP11-593F23.1	0.0354351	1.8351	RP11-22B23.1	9.86623e-08	0.483261
RP11-601I15.1	0.00948312	2.01328	RP11-244K5.8	9.35086e-06	0.464458
RP11-613F7.1	0.0496605	2.18888	RP11-24B19.4	0.0491452	0.399096
RP11-613M10.6	0.0282526	1.73965	RP11-262H14.5	0.00482912	0.400675
RP11-629O1.2	0.00334315	1.50664	RP11-273G15.2	0.000386495	0.312436
RP11-62J1.3	0.0113891	2.44628	RP11-275I14.4	0.0167523	0.612771
RP11-640I15.1	0.00386877	2.57821	RP11-290L1.4	0.0290182	0.535933
RP11-645C24.2	0.0195962	2.64089	RP11-296E7.1	0.00145319	0.552263
RP11-65J21.3	0.000950675	2.00705	RP11-299G20.2	0.000283897	0.596712
RP11-661A12.9	0.00822329	3.70114	RP11-304L19.8	0.0108198	0.262807
RP11-66B24.4	0.000914679	1.6664	RP11-307C12.12	0.00878614	0.637179
RP11-690D19.3	0.000277929	1.64397	RP11-308D16.4	0.0170329	0.64259
RP11-700J17.1	0.0388717	1.99161	RP11-312O7.2	0.00047666	0.656691
RP11-712B9.5	0.00256452	1.71919	RP11-314C16.1	0.0466446	0.380779
RP11-71G7.1	0.0103388	3.67496	RP11-314O13.1	0.00882765	0.649581
RP11-727F15.13	0.01414	2.55608	RP11-316M1.12	0.00290457	0.391123
RP11-73C9.1	0.0315813	1.82817	RP11-318E3.4	0.0275619	0.124212
RP11-73M18.10	0.0263321	1.58006	RP11-324I22.4	0.0267699	0.617449
RP11-745A24.2	0.0168267	2.90864	RP11-329A14.1	0.000317628	0.453531
RP11-747H7.3	0.00117648	1.52631	RP11-333E13.4	0.0117453	0.442657
RP11-750B16.1	0.00432137	2.05028	RP11-341B24.3	0.0072106	0.336643
RP11-761N21.2	0.00582148	1.69697	RP11-347C18.3	0.0128113	0.487345
RP11-766N7.3	4.40615e-07	2.23072	RP11-350J20.12	0.0199707	0.375584
RP11-770J1.5	0.000427562	3.84279	RP11-351I21.11	0.00527324	0.385672
RP11-774O3.3	3.15485e-07	1.75159	RP11-359B12.2	0.000569341	0.518821
RP11-778J16.2	0.00238915	2.35256	RP11-381K20.2	0.000140966	0.381406
RP11-77E14.2	0.0320979	2.21022	RP11-396C23.2	0.012035	0.497995
RP11-77H9.2	2.92124e-05	1.53191	RP11-401P9.4	0.00772699	0.600449
RP11-783K16.5	0.0031452	1.51656	RP11-416N13.1	0.00987201	0.657132
RP11-796G6.1	0.00431949	2.07578	RP11-419C5.2	0.0148166	0.598759
RP11-7D5.2	0.0322644	2.33086	RP11-424C20.2	9.52574e-07	0.591267
RP11-809C18.4	0.00312164	2.71395	RP11-439A17.9	0.0077776	0.52614
RP11-829H16.2	0.0100006	1.77875	RP11-439E19.10	0.00124323	0.384216
RP11-83J16.1	0.034907	2.02015	RP11-458D21.5	0.000427562	0.589227
RP11-848G14.2	0.019965	1.72909	RP11-474G23.1	0.00425974	0.131927
RP11-849F2.10	0.0261106	1.83757	RP11-47A8.5	0.000157726	0.525832
RP11-863K10.7	0.0380052	2.8328	RP11-488P3.1	0.00789615	0.332094
RP11-864N7.2	0.00414149	1.66836	RP11-49I11.1	0.0186345	0.653117
RP11-87C12.2	0.0116736	2.44531	RP11-521B24.3	7.7658e-07	0.589355
RP11-902B17.1	0.000511648	2.50109	RP11-531A24.5	0.00592192	0.598736
RP11-91G21.1	0.000409817	1.56458	RP11-539I5.1	0.0266447	0.645437
RP11-93B14.6	0.0448863	1.82436	RP11-545A16.3	0.0186503	0.395632
RP11-941H19.1	0.0442694	1.99269	RP11-549B18.1	0.00766609	0.499246
RP11-96D1.10	0.00744329	1.99299	RP11-54C4.1	0.0186503	0.572525
RP11-96K19.4	0.00350546	1.74043	RP11-552F3.12	0.00468279	0.410883
RP11-996F15.2	0.000485768	2.05614	RP11-552F3.9	0.0188752	0.619489
RP13-104F24.3	0.00232395	1.5226	RP11-564D11.3	0.000298697	0.650636
RP13-131K19.6	0.0381648	2.08499	RP11-567M16.1	0.015783	0.279073
RP13-140E4.1	0.00586836	1.88059	RP11-57A19.2	0.000125308	0.64798
RP13-487P22.1	0.0187268	2.43005	RP11-617D20.1	0.00747417	0.55598
RP13-516M14.1	0.000917893	1.50195	RP11-61L19.3	0.0449688	0.59815
RP13-585F24.1	0.0443145	1.83452	RP11-632K20.7	1.00735e-08	0.287466
RP3-342P20.2	0.0192089	1.50275	RP11-667M19.9	0.0383452	0.438461
RP3-375P9.2	0.0290746	1.86701	RP11-670E13.2	0.0476272	0.472357
RP3-437C15.1	0.0155501	2.5067	RP11-67L2.2	3.46128e-07	0.37237
RP3-475N16.1	0.0360539	1.96602	RP11-685M7.3	0.00270342	0.518323
RP3-486I3.4	0.00210087	1.82014	RP11-708J19.1	0.0051638	0.637162
RP4-549L20.3	0.000839536	1.69802	RP11-715J22.4	0.00231612	0.567098
RP4-604A21.1	0.0198534	2.09458	RP11-723O4.9	0.0411157	0.646269
RP4-669P10.19	0.0344961	1.89302	RP11-726G1.1	0.00235366	0.656105
RP4-710M16.2	0.00896047	3.08282	RP11-744K17.2	0.000179628	0.365881
RP4-813F11.4	7.91319e-05	1.81635	RP11-744K17.9	0.00496709	0.46522
RP4-814D15.2	0.0341961	2.11537	RP11-760D2.10	0.0103227	0.382793
RP5-1085F17.3	0.000119641	1.59958	RP11-770G2.5	0.0407065	0.339445
RP5-827C21.4	0.0258711	1.61993	RP11-793H13.11	0.00381773	0.62179
RP5-850E9.3	0.0259297	2.24781	RP11-797A18.4	0.0148089	0.369205
RP5-854E16.2	0.0052537	2.70684	RP11-797A18.6	0.0248594	0.544564
RP5-855D21.2	0.0318855	2.11338	RP11-800A3.7	0.0378383	0.396251
RP5-857K21.11	0.000687154	1.76331	RP11-816J6.3	0.0229704	0.431872
RP5-857K21.7	0.0113723	1.74162	RP11-848P1.2	0.0423103	0.583649
RP5-882O7.1	0.00894109	2.09644	RP11-861E21.2	0.000262622	0.423691
RP5-886K2.1	0.0400874	1.75455	RP11-876N24.4	0.0349796	0.639962
RPL10AP2	0.0107211	1.6423	RP11-958N24.1	1.36788e-09	0.454806
RPL10L	0.00147636	1.5434	RP11-96C23.11	0.00146853	0.367893
RPL12P4	6.72009e-05	1.59897	RP11-982M15.2	0.00869009	0.411938
RPL13AP25	0.0224048	1.57129	RP13-616I3.1	0.000317799	0.348281
RPL13AP3	0.0370513	1.78854	RP13-735L24.1	0.00554296	0.504893
RPL13P12	0.000872655	1.54182	RP13-766D20.2	0.043705	0.630665
RPL17-C18orf32	0.0178554	1.91114	RP3-402G11.26	0.00414527	0.64396
RPL18P10	0.010925	2.53889	RP3-497J21.1	0.00691603	0.604944
RPL19P12	0.0266788	1.6476	RP4-559A3.7	0.0101269	0.634583
RPL21P11	0.000128927	2.46694	RP4-561L24.3	0.00481435	0.433888
RPL21P119	0.000475052	2.58454	RP4-641G12.4	0.0497183	0.582404
RPL21P120	0.00228208	2.27871	RP4-694A7.2	0.00036725	0.518831
RPL21P28	0.00390297	1.57199	RP4-694B14.5	3.18939e-06	0.633824
RPL23AP2	0.00795407	1.70298	RP4-758J18.10	0.00648075	0.51853
RPL23AP7	2.09187e-05	1.75114	RP5-1061H20.3	0.00333656	0.377631
RPL23P2	0.010508	2.03656	RP5-1148A21.3	0.00164872	0.576675
RPL23P8	0.0122792	1.70008	RP5-1157M23.2	0.0197573	0.521272
RPL24P8	0.00262034	1.97568	RP5-1160K1.6	0.0466446	0.592312
RPL26P30	0.016049	1.8262	RP5-902P8.10	0.0295266	0.45562
RPL26P37	0.00415905	2.76958	RPIA	1.56198e-06	0.592586
RPL29P12	0.0258968	1.9627	RPL9P29	0.016324	0.515719
RPL30P4	0.0302645	2.62914	RSC1A1	2.97923e-07	0.0907895
RPL32P29	0.0163529	3.31164	RSG1	0.00418082	0.632342
RPL34P18	0.00162789	2.09223	RTDR1	0.0455724	0.540249
RPL34P34	0.0133874	2.64979	RTN4R	4.68183e-05	0.658201
RPL35AP32	0.00728621	1.75429	RUNX1	3.64695e-05	0.656959
RPL35P1	0.0296518	1.83883	RUNX2	4.01201e-05	0.601032
RPL35P5	0.00980506	1.63713	S1PR3	1.76527e-09	0.644554
RPL37P23	0.026279	1.74646	SAMD11	5.24983e-10	0.420709
RPL39P5	0.00762765	3.75454	SAPCD2	9.07365e-11	0.592088
RPL3P2	0.00201621	1.6946	SBK1	2.15709e-08	0.502448
RPL3P6	0.040532	2.02063	SCARA3	1.07075e-08	0.432342
RPL3P7	0.0116461	1.76315	SCCPDH	3.00113e-09	0.514622
RPL5P12	0.00381389	2.48717	SDC3	4.20815e-09	0.629345
RPL5P17	0.0444102	1.81632	SDCCAG8	2.85554e-05	0.656984
RPL5P29	0.0488094	1.84104	SDK2	0.010971	0.65039
RPL5P3	0.00763646	2.16096	SEC24B-AS1	0.00322642	0.277022
RPL5P34	0.00518702	1.51428	SEMA3F	4.14262e-07	0.62407
RPL5P4	0.00134503	1.58337	SEMA4D	1.27052e-07	0.621817
RPL7AP11	0.00815238	1.7047	SEMA4F	8.48502e-06	0.539428
RPL7AP30	0.0120548	1.5548	SEPN1	4.47918e-11	0.474828
RPL7AP66	0.0301598	1.51864	2017-09-01	0.0320569	0.649236
RPL7P23p	0.0303903	1.62624	SERAC1	0.00186234	0.595749
RPL7P44	0.00127121	2.17333	SERTAD4	0.000756004	0.550456
RPL9P18	0.0267195	1.94176	SESTD1	1.14152e-09	0.440788
RPL9P28	0.0248077	2.4248	SF3B1	1.54987e-12	0.4838
RPL9P32	0.00116012	2.70665	SFN	0.0275521	0.43224
RPLP0P2	0.00841748	1.67729	SFT2D2	2.09282e-09	0.637484
RPP40	3.02908e-09	1.63809	SGCB	2.49806e-09	0.508924
RPPH1	0.000286314	2.95329	SGOL1	4.84256e-08	0.625796
RPS11P5	0.0158562	1.6533	SH3GLB2	3.81908e-09	0.621843
RPS14P3	0.00522286	2.31326	SHANK3	2.89844e-07	0.558366
RPS17P5	0.029134	2.16526	SHCBP1	4.31112e-12	0.468341
RPS18P12	0.0154453	1.80012	SHOX2	0.00656992	0.519238
RPS18P9	0.000684008	1.89061	SIGMAR1	5.99422e-12	0.485072
RPS20P10	0.0253273	2.33835	SIMC1	3.59382e-08	0.46616
RPS20P14	0.0407329	1.61386	SIRPA	1.97745e-05	0.55837
RPS23P8	0.000379298	1.69589	SIRPB1	0.0298924	0.440716
RPS24P17	0.00912417	2.70031	SIX2	0.00110375	0.601077
RPS24P8	0.00093835	1.84764	SIX3	0.00177924	0.343091
RPS26P13	0.0165357	2.53351	SKA1	7.31122e-08	0.539246
RPS26P3	0.0312109	1.78515	SKIDA1	0.0298517	0.48645
RPS27AP2	0.0435995	2.32989	SKP2	2.12075e-11	0.455575
RPS29	8.65257e-06	1.57447	SLAIN1	2.47806e-06	0.634782
RPS2P55	0.0206706	1.5368	SLC16A10	1.22768e-07	0.584229
RPS3AP47	0.0372922	1.66901	SLC16A14	4.1554e-11	0.448262
RPS3AP5	0.010301	1.61153	SLC16A3	1.09746e-09	0.579217
RPS4XP2	0.0179978	2.7471	SLC16A6	2.73494e-09	0.555294
RPS4XP3	0.00982427	2.41539	SLC1A4	2.92439e-06	0.537848
RPS7P10	0.00598105	1.65743	SLC22A31	2.78393e-07	0.463246
RPSAP14	0.0336185	2.40962	SLC23A1	0.00874518	0.665735
RPSAP8	0.0432608	1.88852	SLC24A3	0.0174359	0.38684
RPSAP9	0.00234539	1.79423	SLC26A2	1.45682e-08	0.66145
RSPH1	0.000120154	2.02782	SLC35D1	0.0198205	0.507333
RSPH10B	0.0160927	2.6984	SLC35E4	3.28255e-05	0.653943
RSPO1	0.0368139	2.31095	SLC36A4	3.01376e-06	0.660342
S100P	2.7143e-05	1.87589	SLC37A1	2.53764e-09	0.515427
SAMD12	1.96595e-06	1.90654	SLC45A3	5.92507e-13	0.437925
SAT1	6.36272e-11	1.91617	SLC4A3	3.51331e-05	0.484751
SCARF1	0.00488055	1.66726	SLC51B	0.025012	0.382297
SCARNA2	0.0415125	2.03988	SLC6A19	0.038116	0.411739
SCARNA7	0.0374162	1.60486	SLC9B2	8.65257e-06	0.618714
SDC4	6.54469e-09	1.97168	SLCO2A1	0.0306586	0.561341
SDCCAG3P2	0.0168285	3.63826	SLIT1	0.0275623	0.210335
SDHCP4	0.000323641	1.59584	SLMO1	1.96048e-07	0.42808
SEMA6A	0.000697662	1.85737	SMAD3	0.000154769	0.614532
SEMA7A	0.000222743	1.53447	SMAD4	1.34038e-08	0.63362
SENP3-EIF4A1	0.00314218	1.64666	SMAD6	1.37385e-08	0.586395
SERBP1P1	0.000811299	1.73607	SMARCD3	2.06402e-08	0.558279
SERBP1P6	0.0156662	1.82162	SMKR1	2.93645e-06	0.56214
SERINC1	5.4194e-10	1.52411	SMO	6.36272e-11	0.251797
SERPINB8	0.00116144	2.3652	SMOC2	0.00653781	0.282295
SERTAD1	9.11431e-05	1.60972	SMOX	0.000736362	0.662511
SGK1	2.76338e-07	1.93164	SNRPA1	3.08993e-10	0.618424
SGPL1	3.80777e-09	1.5695	SNX10	0.000319148	0.609941
SH3BGRL2	0.00423721	2.0629	SNX24	2.85626e-06	0.47852
SIPA1L2	2.5653e-09	2.03582	SNX9	1.78051e-07	0.522108
SLC13A3	5.73322e-08	1.64475	SOCS6	2.75696e-09	0.29723
SLC1A3	9.63585e-06	1.6238	SOCS7	6.24928e-06	0.639096
SLC22A14	0.0293505	2.40847	SOGA1	4.68512e-13	0.399348
SLC25A16	2.04399e-10	1.75321	SORBS3	4.11517e-07	0.432065
SLC25A18	0.000868347	1.86553	SORT1	2.05826e-06	0.629323
SLC25A48	0.00027456	1.9971	SOX6	0.033561	0.502851
SLC2A12	3.16932e-07	2.41469	SP5	0.00168703	0.303283
SLC2A4	0.0001302	1.55418	SP6	3.81154e-06	0.529119
SLC30A1	3.04002e-11	1.76244	SPATC1	0.000623115	0.335332
SLC30A2	8.14914e-05	2.68097	SPC25	7.25368e-08	0.6094
SLC38A2	1.26037e-10	1.55922	SPDL1	1.57749e-08	0.625294
SLC38A7	2.96916e-09	1.59861	SPECC1L-ADORA2A	0.000302388	0.443886
SLC38A9	1.91723e-07	1.54624	SPTBN5	4.50678e-08	0.662298
SLC3A2	5.71136e-09	1.54065	SREK1IP1	3.11086e-09	0.495882
SLC45A2	0.017767	2.29159	SRI	2.82924e-08	0.640285
SLC45A4	2.1024e-07	1.50911	SRR	1.55006e-06	0.630697
SLC4A10	0.00415029	1.80524	SRRM3	5.41562e-06	0.448278
SLC5A1	0.00394503	2.46576	SSH1	2.61626e-11	0.433012
SLC5A11	0.0319135	3.19597	SSR4P1	0.0423704	0.651828
SLC6A9	2.98512e-05	1.54796	ST3GAL4	9.53919e-07	0.612455
SLC7A11	9.67985e-10	1.78058	ST6GALNAC4	1.38283e-06	0.655999
SLC7A11-AS1	0.000105595	2.59317	STAT5B	4.58602e-09	0.604831
SLC8A2	0.0474874	2.14626	STIM1	1.91248e-08	0.628907
SLC9A9	0.0193698	2.24623	STK24	6.80062e-10	0.582565
SMPDL3B	3.64154e-08	1.60502	STK24-AS1	0.000289445	0.212332
SNHG9	2.06352e-07	1.56199	STOX1	0.000933101	0.539139
SNORD3A	0.000259268	3.80116	STRADB	9.07365e-11	0.410703
SOCS2-AS1	0.00292794	2.07437	STRIP2	7.56949e-08	0.621361
SOCS5P4	0.0397966	2.39953	STX16-NPEPL1	0.0376626	0.615969
SP100	8.23152e-07	1.61091	STX17	1.30569e-07	0.660504
SP110	1.26502e-06	1.83519	SYCE2	0.00688665	0.637544
SP140L	0.00200591	1.66973	SYCP2	0.0445891	0.531655
SPARCL1	0.0481204	1.88936	SYDE1	0.0251748	0.403023
SPATA1	0.0141328	1.77016	SYNGR1	0.000149258	0.650504
SPATA31E3P	0.00097014	2.87521	SYNM	1.47639e-08	0.59626
SPATA6L	0.0163793	1.52293	TACC3	6.69585e-11	0.61394
SPDYA	2.88291e-05	2.03267	TANGO2	1.23621e-08	0.537942
SPIB	0.0386906	2.60578	TBC1D10C	8.38609e-07	0.614042
SPOCK2	0.00400311	1.64798	TBX1	1.58711e-08	0.550645
SQSTM1	1.07073e-10	1.89066	TBX2	0.000966341	0.277494
SRPK3	0.000315614	1.56836	TBXA2R	0.00426137	0.328134
SSTR5-AS1	0.0322768	1.51486	TCF19	1.97385e-10	0.551639
ST3GAL1	6.36272e-11	1.57137	TCF7	0.00600439	0.628935
STRC	0.000191297	1.87501	TCOF1	5.91465e-10	0.661373
STX19	0.0113066	1.76095	TCP11L1	7.09224e-07	0.520547
SUB1P1	0.0363978	2.02799	TCTEX1D2	1.3452e-05	0.583751
SUSD4	0.00625751	2.07327	TCTN1	4.07429e-08	0.471344
SV2C	0.0342322	1.85427	TCTN2	1.07497e-06	0.579421
SYT1	0.0138606	1.99416	TDRD6	0.00186829	0.569665
SYT17	0.0123915	1.77494	TEAD1	1.27246e-09	0.601127
SYTL4	2.65394e-07	1.66432	TEAD3	1.14071e-06	0.665223
TAF13	4.36045e-10	1.56913	TENC1	1.73767e-10	0.531556
TAF7L	0.015567	1.92169	TERT	2.62025e-06	0.603671
TAPBPL	9.50866e-06	1.65479	TESK1	2.9815e-11	0.309325
TAS2R5	0.000671669	2.74641	TEX19	0.000128696	0.509833
TBC1D13	1.99505e-09	1.61858	TGM4	0.000168665	0.404297
TBC1D4	4.18741e-08	1.56572	THAP3	2.93393e-06	0.659699
TBKBP1	6.65015e-08	1.52484	THAP7	4.26622e-09	0.568262
TBX10	0.000545262	2.37174	THAP7-AS1	0.000695466	0.653473
TBX15	0.00286321	1.71994	THBS2	0.0060137	0.557037
TCP10L	0.00225523	2.38491	THRB-AS1	0.0355696	0.547501
TCP11L2	8.33415e-06	3.75322	TICRR	2.04399e-10	0.473015
TDPX2	0.0373075	2.2047	TIGD3	0.0010456	0.483016
TECTA	0.00288464	2.05599	TIGD5	1.59728e-08	0.432578
TERC	0.0019686	2.89036	TLK2	2.18681e-08	0.637795
TESK2	1.56476e-07	1.64902	TLK2P1	8.95789e-06	0.618419
TFB2M	4.03905e-08	1.52581	TM4SF19-AS1	0.00189757	0.340908
TFCP2L1	0.00230174	2.65134	TM6SF1	0.010543	0.370876
TIAM2	1.77102e-05	1.72917	TMCC2	0.0153808	0.605944
TLE4	0.0194775	1.85989	TMEM100	0.0222051	0.349509
TLK1P1	0.00180275	1.5381	TMEM117	3.05471e-05	0.407715
TMC4	4.16424e-08	1.86196	TMEM121	2.86993e-05	0.348536
TMCC3	0.00782754	1.67651	TMEM158	2.30955e-05	0.436023
TMEM102	0.000175609	1.50712	TMEM170B	4.5995e-06	0.453131
TMEM154	7.01246e-05	1.65837	TMEM179	1.25537e-08	0.174334
TMEM2	6.67388e-09	1.5865	TMEM189	5.38726e-10	0.352316
TMEM220	0.0262274	2.2162	TMEM194B	1.28863e-05	0.651625
TMEM236	0.000523796	2.40907	TMEM214	5.72128e-10	0.591199
TMEM40	0.00441287	2.31056	TMEM229B	9.93852e-05	0.38697
TMEM59L	0.00392368	1.59138	TMEM254-AS1	4.34608e-05	0.662184
TMEM81	0.000145104	1.64969	TMEM37	0.00011318	0.616983
TMEM88	0.000155453	2.05245	TMEM56	3.51186e-06	0.659078
TMEM91	0.0195424	1.74553	TMEM8B	1.73281e-05	0.663404
TMEM92	0.00145501	1.64089	TMEM98	5.20929e-08	0.619914
TMPRSS11E	1.33515e-05	1.90743	TMOD2	7.65811e-07	0.342487
TMPRSS13	5.65946e-05	1.73487	TMPO	3.11014e-12	0.54384
TMPRSS2	8.55116e-11	1.52549	TMPO-AS1	5.94805e-05	0.578704
TMSB4X	1.82882e-08	2.20112	TMPRSS4	0.000178434	0.384823
TMSB4XP8	0.00984306	2.57274	TMSB15B	0.0202736	0.549845
TNFAIP3	1.58458e-05	1.86558	TNFAIP2	8.23061e-05	0.507786
TNFRSF10D	3.31455e-10	1.66793	TNFRSF11A	0.00179397	0.611875
TNFRSF12A	1.27184e-06	1.67272	TNFRSF13C	0.0450396	0.501459
TNFSF15	7.29156e-06	2.01995	TNFRSF18	3.39212e-06	0.314207
TNIK	0.000337412	1.78636	TNFRSF8	0.0465197	0.583446
TOM1	7.66128e-09	1.63932	TNFSF10	0.000748619	0.482128
TOMM7	9.79544e-08	1.50262	TOP2A	6.92243e-10	0.622199
TP53I3	1.74561e-05	1.51078	TOP2B	2.58965e-10	0.637537
TP53INP1	5.55196e-12	2.48584	TOR3A	2.17251e-08	0.662812
TP53INP2	1.26037e-10	1.81261	TP53I13	6.64364e-09	0.463684
TPBG	0.0003611	1.79981	TPX2	1.83063e-09	0.656458
TPM2	2.84271e-05	1.61055	TRAF3IP1	7.05423e-09	0.571722
TPTE	0.0195941	2.01897	TRAM2-AS1	1.89703e-05	0.587405
TRANK1	3.99959e-05	1.91623	TRIM47	5.2424e-07	0.576212
TRGC2	0.0412264	1.65878	TRIM49D1	0.0192298	0.500817
TRIB1	1.85867e-07	1.51116	TRIM69	1.5519e-08	0.590761
TRIM6	0.0263902	1.85742	TRIP13	4.08225e-09	0.660776
TRPS1	1.05538e-06	1.58877	TRNP1	6.22894e-05	0.547182
TSC22D1	4.00475e-10	1.58307	TRPV3	9.33964e-10	0.383367
TSHZ2	0.000676941	1.79386	TSHZ1	2.00354e-07	0.5874
TSPEAR	0.0189276	2.53365	TSPAN11	0.0316941	0.589689
TSPY26P	0.00905359	2.39388	TSPAN3	7.26843e-09	0.65965
TSPYL2	6.2715e-09	1.60507	TSPAN33	4.19803e-08	0.583976
TTC1	2.78005e-09	1.61197	TSPAN5	0.0455385	0.637289
TTC18	1.34543e-08	2.09408	TTC12	2.11593e-07	0.552972
TTC23L	0.0397562	1.74483	TTC16	0.0128017	0.497107
TTLL1	4.70401e-05	1.65999	TTC36	0.00793181	0.42308
TXK	0.00696187	1.97762	TTC8	3.02908e-09	0.539193
TXNIP	1.52435e-11	2.04811	TUB	2.61626e-11	0.4082
TXNRD1	2.98279e-11	1.62918	TUBB6	3.37896e-07	0.610171
TYW1B	0.00136501	1.6748	TUBG1	8.36396e-11	0.577262
UBL5P2	0.0357452	2.79208	TULP1	0.0285731	0.49156
UCN	0.0064696	1.8418	TUSC1	1.16943e-07	0.413149
UGT1A1	0.00228336	5.81347	TWSG1	2.90053e-12	0.26082
UGT1A6	0.00112382	8.7917	TXNDC12	4.36774e-09	0.568925
UGT1A8	0.0357009	2.57796	TXNRD3	2.77884e-09	0.393483
UGT2B11	0.000397889	2.16153	TYSND1	9.33092e-10	0.556602
UGT2B15	0.00112203	1.50855	UBAC1	1.5099e-09	0.634603
UGT2B28	0.00432503	1.58906	UBE2L6	0.000380582	0.257695
UNC79	0.0211325	2.37846	UBE2S	2.12075e-11	0.56678
UPB1	0.0295916	1.6822	UBE2SP1	0.00324491	0.661198
VAMP5	0.0252124	3.14973	UBXN2A	4.53259e-08	0.574139
VANGL2	0.034334	1.54061	ULK2	2.58965e-10	0.430258
VCX	6.61331e-06	1.68166	UNC119	1.03298e-08	0.568143
VCX3B	0.0228564	1.76182	UNG	3.76121e-09	0.611497
VIM	8.39146e-08	1.84837	USP28	1.18171e-08	0.665641
VN1R1	0.00967032	2.55077	VARS2	4.35665e-08	0.650247
VSTM2A	0.0119125	1.6392	VAX1	0.0031452	0.48909
VWA5A	0.00239654	1.57839	VEPH1	0.000504301	0.660264
WDR37	1.51503e-08	1.55684	VPS4A	3.31442e-10	0.622897
WFIKKN1	0.000356225	2.0515	VWA1	1.86287e-10	0.598246
XDH	0.00736204	1.81668	WDR60	4.67448e-07	0.591347
XXbac-B461K10.4	9.33374e-07	1.79191	WDR76	3.70395e-08	0.650388
YBEY	1.69193e-05	1.62026	WDR83	1.76937e-05	0.649623
YBX1P6	0.0377803	1.81637	WHAMMP2	4.39232e-06	0.239739
YPEL2	2.47879e-10	2.10823	WHAMMP3	6.26076e-09	0.254278
ZACN	0.000170895	2.42168	WHSC1	1.6753e-11	0.566277
ZBBX	0.0355075	2.07123	WNK2	4.36774e-09	0.665925
ZEB1	0.0453028	2.45435	WNT10A	0.00640183	0.600189
ZFAND2B	4.86231e-06	1.63392	WNT3	7.53243e-05	0.447013
ZFYVE1	6.68539e-08	1.7367	WNT7B	3.51557e-09	0.621082
ZFYVE26	1.40147e-09	1.6038	WWC2	5.35129e-06	0.639174
ZGLP1	0.00076201	1.52316	XPA	1.98481e-07	0.625062
ZNF10	6.35442e-07	1.6645	XRCC2	8.21838e-10	0.544735
ZNF154	0.000664088	1.99246	XXbac-B562F10.11	0.000258529	0.586903
ZNF205-AS1	0.00785057	1.98772	YEATS4	7.58409e-08	0.663741
ZNF222	0.00248179	1.5743	YPEL1	0.00434754	0.647742
ZNF223	9.62989e-06	1.69929	ZBED5-AS1	1.62211e-05	0.505038
ZNF274	1.53006e-08	1.68013	ZBTB32	0.01448	0.483608
ZNF277	4.67448e-07	1.54243	ZC2HC1C	4.41898e-06	0.548744
ZNF284	0.0001797	1.67982	ZC3H18	2.45831e-09	0.647445
ZNF300	6.25473e-09	1.56912	ZC3H7B	2.46e-10	0.616184
ZNF350	1.40255e-06	1.60491	ZDHHC13	2.43109e-08	0.633892
ZNF365	3.92286e-05	1.83171	ZDHHC20	2.10008e-10	0.443262
ZNF404	0.00501037	1.7114	ZDHHC20P4	5.48167e-07	0.404067
ZNF416	0.000111822	1.50627	ZDHHC8P1	1.15376e-05	0.492672
ZNF418	0.00167253	1.53174	ZFP30	3.14762e-11	0.331335
ZNF419	2.15294e-06	1.58202	ZFP82	1.54241e-06	0.603419
ZNF502	7.18114e-05	1.96483	ZFX	1.85514e-12	0.345549
ZNF516	0.0127316	2.55101	ZFYVE28	0.0100809	0.596337
ZNF549	1.12108e-06	1.51159	ZFYVE9	3.81802e-09	0.574771
ZNF570	0.000826611	1.51401	ZFYVE9P1	0.0101046	0.544866
ZNF571	4.90789e-05	1.55637	ZKSCAN8	2.87813e-09	0.515943
ZNF585A	1.7976e-07	1.61428	ZMYND11	2.86454e-11	0.428606
ZNF585B	2.65596e-06	1.52644	ZNF174	4.694e-06	0.630623
ZNF600	1.08933e-06	1.58614	ZNF204P	4.76537e-05	0.286808
ZNF641	4.34366e-08	1.63568	ZNF236	7.65786e-07	0.655403
ZNF671	0.0290041	1.55933	ZNF25	1.54939e-05	0.609211
ZNF812	5.00082e-05	1.74885	ZNF275	9.33964e-10	0.514258
ZNF836	3.6282e-05	1.67192	ZNF318	1.50351e-08	0.60994
ZRANB2-AS1	0.0201472	2.56605	ZNF319	7.46798e-10	0.327317
ZSCAN9	2.1136e-06	1.52915	ZNF32	5.20929e-08	0.622846
hsa-mir-6723	5.48609e-09	1.5191	ZNF337	5.68784e-08	0.572002
			ZNF354C	3.22286e-05	0.596261
			ZNF358	1.03621e-07	0.630362
			ZNF362	1.02092e-06	0.588578
			ZNF37A	9.68047e-10	0.654059
			ZNF395	1.0475e-08	0.640609
			ZNF511	3.31442e-10	0.599918
			ZNF514	4.23951e-06	0.616411
			ZNF618	6.69792e-08	0.619098
			ZNF639	9.59065e-09	0.639367
			ZNF658	3.21129e-05	0.616776
			ZNF658B	0.0352748	0.442536
			ZNF66	0.00277168	0.657326
			ZNF704	3.99997e-08	0.547549
			ZNF71	9.52356e-05	0.496852
			ZNF730	0.00027456	0.462467
			ZNF738	2.2459e-05	0.649
			ZNF783	2.88547e-07	0.644644
			ZNF835	0.0251052	0.375643
			ZNRF2	2.43435e-09	0.350226
			ZNRF2P2	0.0013276	0.279648
			ZXDA	2.69785e-05	0.630551
			ZYG11B	4.26371e-11	0.500828

## Sheet: Table S4B
Supplemental Table S4B. Differentially expressed genes upon ZFX Knock down in MCF-7
Upregulated genes			Downregulated genes
Gene Name	FDR (siZFX vs siCtrl)	Expression change (ratio)	Gene Name	FDR (siZFX vs siCtrl)	Expression change (ratio)
ABCG2	0.000300792	1.62087	ABCB10	9.7441e-05	0.514383
AC005077.12	0.0172891	2.80672	AC007383.3	0.000359638	0.415126
AC005077.14	0.00365582	2.11203	AC009299.3	0.00093855	0.4249
AC009061.1	0.0410808	1.76556	AC018720.10	0.0330414	0.661566
AC079305.10	0.00365582	1.54584	AC147651.3	0.00396039	0.584713
AC084125.4	0.0253359	3.13381	ACADSB	3.36044e-05	0.501238
ADM2	8.66549e-05	1.92992	ACAT1	0.000317205	0.60214
ALDH1L2	0.0061529	1.68874	ADAP2	0.0190546	0.48162
ALDH3A1	0.0382588	2.1635	AFAP1L2	7.22874e-05	0.53133
ANGPTL4	0.0304114	1.51289	AGPAT3	9.85864e-05	0.661208
ANXA1	0.00453461	1.67011	AKAP7	0.00093855	0.390494
AP003068.9	0.0469908	2.86471	AMER1	0.000180708	0.541274
APOBEC3A	0.0199072	3.1134	AMIGO1	0.000181454	0.560923
AQPEP	0.036079	1.65597	AMPD3	0.0193259	0.630817
ARG2	0.0119885	1.66249	AMZ2	0.000120235	0.635487
ASB3	0.00460579	6.17531	ANKRD13B	0.000861315	0.541526
ASNS	0.000120235	1.53548	ANKRD16	0.000338402	0.569126
ASNSP1	0.0287172	1.92503	ANKRD52	9.52654e-06	0.469924
ATF3	1.76877e-05	2.15148	ANKRD6	0.0176115	0.638957
ATP5G1P4	0.0440057	1.88428	AP001372.2	0.0315242	0.657163
BDKRB2	0.000770144	1.52501	APBA2	0.00434224	0.546131
BEST1	0.00034378	1.55958	APCDD1	0.00216715	0.530807
BHLHA15	0.000267472	2.0187	APLP1	0.0157117	0.612619
BIRC3	0.000243058	1.84317	ARAP3	0.00981923	0.484942
BMS1P4	0.0283153	1.57692	ARHGEF25	0.000919274	0.5818
C11orf96	0.00748427	1.64011	ARNT2	0.000352694	0.55941
C12orf79	0.0315339	1.76451	AS3MT	0.00163262	0.103625
C17orf107	0.000161081	1.93857	ATP6V0E2	0.00281106	0.659603
C1orf116	0.0255218	1.74636	AUTS2	0.0487895	0.657081
C2CD4A	0.000813643	1.93904	B3GNT1	0.00093855	0.627532
C3	0.000861315	1.88192	B4GALT6	0.000196834	0.428595
CCNA1	0.00403371	2.2099	BEND7	0.00021711	0.584721
CEBPB	7.22874e-05	1.55779	BIVM	4.76383e-05	0.484024
CHAC1	0.001305	1.66971	BNC1	0.0252744	0.404634
CLGN	0.0277428	1.72354	BSN	0.01968	0.646158
CNTD2	0.002514	1.85756	C17orf75	0.00501767	0.648877
COL9A3	0.01135	1.50227	C19orf12	0.000313691	0.584956
COLEC12	0.0470147	2.50005	C20orf197	0.0445993	0.47622
CPEB3	0.00733236	1.56472	C2CD2	0.000614802	0.660286
CREB5	0.0433292	1.87413	C2orf72	0.0261701	0.477863
CSRNP1	0.00036126	1.53668	C5orf42	0.000174731	0.501277
CTD-2008P7.9	0.0203847	1.70347	C6ORF165	0.049642	0.657044
CYP1A1	0.00722749	9.6786	C6ORF50	0.01653	0.510185
CYP1B1	0.00977502	2.21356	CABLES2	0.000149559	0.647246
DAPP1	0.00329685	1.9805	CAMK1	0.0144221	0.6649
DDIT3	7.19573e-05	1.61286	CAPRIN2	0.00304501	0.610042
DLGAP1-AS2	0.00261595	1.56551	CASC10	0.0136532	0.64689
DNAJB9	0.00524448	1.58881	CASKIN1	0.00203156	0.60588
DUSP8	0.000770144	1.51134	CASP16	0.0494392	0.399396
EAF2	0.00803617	1.75716	CCSAP	0.000630776	0.63721
EID3	0.0334758	1.6531	CDC27	0.000222439	0.66187
ELL2P1	0.012316	1.57992	CDH18	0.0398467	0.537661
ENTPD8	0.00503126	1.62079	CDK14	0.0104407	0.637214
F8A3	0.0432185	2.08376	CEBPA-AS1	0.0206704	0.593241
FAM129A	0.00537515	1.64013	CELF5	0.0352499	0.598499
FAM83A-AS1	0.0370618	2.38967	CEP112	0.0289761	0.487672
FBXO16	0.00675764	1.56806	CEP19	0.0103158	0.538083
FGF12-AS2	0.0264765	2.04451	CEP68	0.000536898	0.643524
FKBP11	0.000191861	1.57832	CHST3	0.00945182	0.617677
FKBP14	0.00203156	1.72046	CNOT6L	0.000561148	0.632205
FOSL1	0.0114322	1.59027	CNOT6LP1	0.0421825	0.608733
FRMD4B	0.00272715	1.60398	COCH	0.00130645	0.636996
FTH1P10	0.0114693	1.52729	COL6A1	0.000890175	0.620165
FUT3	0.00610027	2.55508	CPNE3	1.4715e-05	0.546569
GAB2	0.000299429	1.50069	CPQ	0.0381742	0.424992
GABARAPL1	0.00209362	1.5594	CRTC3	4.63754e-05	0.550105
GADD45A	0.000203965	1.70227	CRYZL1	0.012544	0.653628
GDF15	0.00162039	1.82209	CTA-445C9.14	0.015954	0.652115
GEM	0.00155085	1.52372	CTB-43P18.1	0.0436274	0.599974
GLDN	0.00623725	1.60991	CTC-241N9.1	0.0211832	0.632829
GMPR	0.0363184	1.78673	CTD-2006H14.2	0.0277049	0.604045
GPR1	0.00720561	2.0364	CTD-2083E4.4	0.0210414	0.555323
HBEGF	4.63754e-05	2.02054	CTD-2292P10.4	0.00738764	0.355595
HERPUD1	1.76877e-05	1.75728	CTD-2313N18.5	0.0128632	0.376475
HIC1	0.0311651	1.54604	CTD-2366F13.1	0.0215477	0.664197
HIST1H1D	0.039766	1.57376	CTD-2369P2.12	0.0484183	0.275957
HIST1H2BO	0.0276456	1.9357	CTD-3074O7.5	0.0183662	0.600155
HIST1H3D	0.00461585	1.67052	CTD-3092A11.2	0.00323906	0.509803
HIST2H4A	0.000412981	1.53271	CTD-3193O13.11	0.0264715	0.632406
HMOX1	5.56259e-05	3.30228	CTSZ	0.00623725	0.604198
HRK	0.00214903	1.65967	CYFIP2	7.22874e-05	0.476388
HSD17B7P2	0.000782537	1.65195	CYP2U1	0.00056849	0.481104
HSPA5	4.63754e-05	1.71972	CYP46A1	0.0107198	0.594471
HYOU1	0.000129011	1.50594	DENND1B	0.000784499	0.559452
ICAM1	0.000231242	1.76172	DICER1-AS1	0.00113611	0.537955
IER3	0.000191861	2.02312	DIRC2	3.36044e-05	0.441658
IFI30	0.0056223	2.09744	DIS3L	6.7955e-06	0.390331
IL32	0.00453461	1.65	DLAT	2.75713e-05	0.47674
IL6	0.0279702	1.78481	DMTN	9.7441e-05	0.475809
IL6R	0.000464808	1.50218	DNAJC25-GNG10	0.00388092	0.58466
IL8	0.0175277	1.75283	DNM3	0.00409025	0.610378
INHBE	0.0010427	1.99947	DOCK7	0.000167174	0.620587
IRAK2	0.000452383	2.01418	DPYSL5	0.00845922	0.543931
IRF7	0.000743672	1.64718	DSTNP1	0.0475932	0.595009
ISG20	0.000505148	1.54118	DTD2	0.000181454	0.635789
ITGA10	0.0483853	1.52018	DTX4	0.00693102	0.624012
KCP	0.00323802	1.73443	DYX1C1	0.0432185	0.528242
KIAA1239	0.0212158	1.99148	ECHDC3	0.00743417	0.455276
KLHDC7B	7.19573e-05	2.47632	EFCAB7	0.00914438	0.641177
KRT13	0.018953	1.51112	EID2B	0.0120606	0.616168
LIF	0.0138999	1.552	EIF2AK2	0.00161719	0.651136
LINC00341	0.0169574	2.65963	EIF2AK4	1.4715e-05	0.513487
LINC00346	0.00633198	2.46938	EIF5A2	0.000919274	0.642712
LIPG	0.0389695	1.58103	ELAC1	0.019946	0.660955
LMCD1	0.00398018	1.73845	ELFN1	0.00914438	0.653896
LONRF3	0.0390602	1.52589	ELMOD3	0.000196834	0.589394
LRG1	0.0356387	1.869	ELOVL4	0.00633462	0.657734
LRRC15	0.00906997	2.44446	EML1	1.4715e-05	0.530051
LSMEM2	0.00392633	2.24712	EXOC5	0.000138877	0.578102
LURAP1L	0.00428406	1.60211	EYA2	0.000714553	0.514371
LZTS3	0.00119645	1.5829	FAM169A	0.000174731	0.511871
MAFF	7.22874e-05	1.79176	FAM172A	0.000964451	0.613137
MAFK	7.19573e-05	1.51489	FAM174A	0.00552031	0.6438
MAP1B	0.000848922	1.67623	FAM189B	0.000353411	0.597396
MAP1LC3B2	0.0125006	1.51802	FAM19A5	0.0263472	0.642625
MAPRE2	0.00208552	1.59675	FAM200B	0.001305	0.666056
MIR22HG	9.7441e-05	1.67029	FAM201A	0.00128394	0.576562
MUC4	0.00784434	2.40623	FAM20C	0.000353275	0.533754
MUC5AC	0.00514277	1.5938	FAM210B	0.000138877	0.654818
MYO7A	0.00784434	1.74558	FAM211B	0.00783577	0.616096
NHLRC4	0.0250075	2.12151	FAM225B	0.0475212	0.453088
NPHS1	0.0396145	2.38568	FAM228B	0.0256773	0.620636
NR1D1	0.000964451	1.5091	FAM58A	0.00690193	0.638348
NR4A1	0.000875963	1.53352	FAM65A	0.000760551	0.649165
NTNG1	0.0208203	2.15184	FAM66C	0.00132014	0.354688
OSGIN1	0.00448611	1.51041	FAM92A1	0.000125885	0.50197
PDLIM3	0.026015	2.0853	FAS	0.00539151	0.527614
PEAR1	0.000986347	2.469	FAXC	0.0138999	0.460405
PFN1P5	0.0193099	4.26607	FBN2	0.0191745	0.457782
PLA2G4C	0.00807606	1.57264	FBXO17	0.00098831	0.479533
PPP1R15A	0.000138877	1.57859	FBXO41	0.000645595	0.575346
PPP2R5B	0.000661765	1.56023	FBXO44	0.000195797	0.461356
PSAPL1	0.0223968	2.74107	FBXO6	0.000359931	0.440417
PTAFR	0.0480814	1.5726	FERMT1	0.00157698	0.605543
PTGR1	0.000161081	1.54455	FN3K	0.000203147	0.538085
PTPRH	0.000194117	2.44074	FOXD2-AS1	0.0338481	0.514445
RAB24	0.000120235	1.50989	FRG1B	0.00392129	0.658123
RAET1K	0.00722749	1.89684	FUCA1	0.000461214	0.646236
RASD1	0.000138877	1.81927	GABBR1	5.4849e-05	0.427046
RELB	0.000300792	1.5337	GABBR2	0.00206653	0.501189
RGCC	0.0125584	1.85599	GABRP	0.00295231	0.390362
RGS16	0.000243058	1.76645	GALNT16	0.00448611	0.551318
RHCG	0.00510799	1.64517	GAMT	0.0333376	0.653001
RND1	0.00330013	1.58368	GAREML	0.00660881	0.526857
RP11-15A1.7	0.0279412	1.83425	GBAS	1.4715e-05	0.424631
RP11-211N8.2	0.0098703	1.59599	GFI1	0.00206052	0.454008
RP11-215G15.5	0.0342195	1.61474	GNAZ	0.000222453	0.483555
RP11-2C24.4	0.00661339	1.95294	GNG4	0.00214903	0.539334
RP11-334L9.1	0.0457983	1.78118	GOLGA8N	0.0043636	0.482356
RP11-39C10.1	0.005848	2.19972	GPLD1	0.00627357	0.540733
RP11-464F9.1	0.0336114	1.84151	GPR125	0.000220779	0.624597
RP11-492E3.2	0.0242705	1.90597	GPR135	0.000292077	0.446062
RP11-60L3.1	0.00697319	2.29014	GPR68	0.00196947	0.579272
SDCBP2	0.000122662	2.05462	GYG2	0.00972253	0.629623
SDF2L1	0.000222388	1.5999	H6PD	0.000120235	0.618252
SDR16C5	0.000833085	1.73321	HADH	0.000411695	0.628088
SELK	0.000833085	1.51289	HCG11	0.000222453	0.578744
SENP3-EIF4A1	0.00656476	1.83273	HCN4	0.0303262	0.619206
SERPINB8	0.00294616	1.52521	HERC3	0.0049403	0.643522
SERPINE2	0.0118774	1.93955	HMCN1	0.000120235	0.665134
SESN2	0.000107394	1.62049	HNRNPA1P16	0.00898204	0.551197
SH2D3A	0.000330155	1.54585	HNRNPA1P33	0.0432185	0.601796
SIGLEC15	0.00554173	1.53725	HOTAIR	0.00923065	0.551489
SLC3A2	1.4715e-05	1.7015	HOXA-AS3	0.0386127	0.370128
SLC6A9	0.000219989	1.73548	HOXA10	0.000464808	0.61956
SLC7A11	0.000226046	1.64379	HOXA4	0.00400948	0.507232
SLC7A5	0.00277308	1.78108	HOXB7	0.000913167	0.583328
ST3GAL1	0.00525028	1.59392	HOXC8	0.0419261	0.521343
STRA6	0.00164247	2.64057	HSD17B12	0.0014463	0.659875
SYNE3	0.0222035	1.66505	HSPD1P11	0.00811158	0.602883
TEX14	0.0119239	1.58323	HTR7P1	0.0355805	0.601908
TMEM156	0.0143848	2.44758	HTRA1	0.00134494	0.609985
TMPRSS11E	0.0414548	1.95303	ICA1L	0.000411695	0.581876
TNF	0.00298719	1.52451	IFIT5	0.000158568	0.567201
TNFAIP2	0.0031507	1.52121	IFT57	0.000377365	0.646249
TNFAIP3	0.000266971	1.53883	IFT74	0.00106444	0.501492
TP53INP2	0.00024601	1.76174	IL17D	0.000976294	0.658026
TRIB3	7.19573e-05	1.70531	IL17RD	0.00300057	0.639848
TRIM29	0.000743672	1.53994	INVS	8.4633e-05	0.515643
UPP1	0.00127886	1.56144	IQCH-AS1	0.0049403	0.634516
XKRX	0.0150898	1.82101	KBTBD11	0.00340341	0.575424
ZEB1	0.0158258	1.59435	KCNAB2	0.000105716	0.51043
ZNF699	0.0179549	1.59512	KCNH2	0.000736042	0.469626
			KCNIP3	0.0372947	0.612578
			KCNJ3	0.0481159	0.662264
			KCNJ8	0.0132215	0.547413
			KIAA1430	0.000412981	0.665415
			KIAA2022	0.00311893	0.364526
			KIF7	0.0489725	0.650898
			KLHDC9	0.0137003	0.577405
			KLHL23	0.00116942	0.594096
			KLRG2	0.00630762	0.607013
			L3MBTL3	0.00244462	0.499784
			LAPTM5	0.040367	0.329751
			LDLRAD4	0.00153623	0.580126
			LGR4	0.000364065	0.642079
			LIMD2	0.00509112	0.659247
			LIMS1	0.000714553	0.666478
			LINC00284	0.00661093	0.216238
			LINC00865	0.00931548	0.546878
			LINC00883	0.00527357	0.542597
			LINGO1	0.000833085	0.541661
			LONRF1	1.4715e-05	0.42493
			LRFN3	0.00743417	0.665013
			LRP3	0.00105379	0.620094
			LRRC27	0.00498041	0.627198
			LRRC41	4.63754e-05	0.54154
			LRRK1	0.000695116	0.549677
			LRRN2	0.0257871	0.596259
			LRWD1	0.00245142	0.628649
			LYRM9	0.000462045	0.452604
			MAATS1	0.0143085	0.42249
			MAGEE1	0.00105741	0.291445
			MAGI2	0.0109168	0.404103
			MAN2A2	5.56259e-05	0.593078
			MAP6	0.00396661	0.179464
			MAP9	0.000714553	0.561532
			MBTPS2	0.000277556	0.666402
			MCOLN3	0.00498041	0.657939
			ME2	0.00079003	0.623496
			MECOM	0.00128394	0.584136
			MFI2-AS1	0.0136969	0.551554
			MGAT5B	0.0102289	0.546323
			MIAT	0.0387259	0.571865
			MLH3	2.75713e-05	0.551052
			MOB1A	7.22874e-05	0.638296
			MRPL45	0.000161081	0.591401
			MTERFD1	0.000299429	0.617077
			MTERFD3	0.000461214	0.592887
			MVB12B	1.4715e-05	0.279902
			N4BP2L1	0.0353035	0.638459
			NAE1	0.00021711	0.642665
			NDFIP1	0.000317205	0.658577
			NECAB1	0.000527327	0.654578
			NFATC4	0.00251204	0.528124
			NMNAT3	0.0355805	0.503665
			NNT-AS1	0.000462045	0.532224
			NOX5	0.00334091	0.528454
			NPEPL1	0.000194117	0.61165
			NPIPA3	0.00277308	0.451517
			NPIPA7	0.0492717	0.662907
			NPIPA8	0.0377491	0.455379
			NREP	0.0218871	0.575453
			NSMAF	1.4715e-05	0.524865
			OGFRL1	0.000834368	0.648588
			OSCP1	0.00208552	0.421659
			PARD3B	0.00448611	0.597658
			PARP16	0.000304818	0.572042
			PARP3	0.0269566	0.635611
			PAX5	0.0334758	0.522414
			PAXIP1-AS1	0.000913167	0.617264
			PCDHA14	0.0406007	0.289269
			PCMTD1	0.0108487	0.656219
			PDCD7	0.000158568	0.621145
			PDE8B	0.00924663	0.576833
			PDZD4	0.00261212	0.646231
			PECR	0.00585594	0.653414
			PELI3	0.000120235	0.47656
			PFN1P4	0.00244186	0.0931086
			PGBD5	0.00507769	0.504369
			PIGZ	0.0011577	0.515797
			PMS2P4	0.0410808	0.656109
			POMGNT1	0.000187759	0.597583
			POMGNT2	0.00323906	0.633868
			PPP1R26-AS1	0.00341672	0.658846
			PPP1R9A	0.00298017	0.55999
			PRDM16	0.00140867	0.639762
			PRKACB	0.000955389	0.603196
			PSG5	0.0282197	0.548035
			PTGFRN	7.86874e-05	0.592461
			PXDN	4.63754e-05	0.616336
			PXK	0.000452383	0.534813
			PYGO1	0.0142022	0.41169
			RAB11FIP2	0.00041409	0.48436
			RAB11FIP5	0.000188902	0.496445
			RAB36	0.000664497	0.396035
			RAB40B	0.000315829	0.576233
			RAI14	0.000919274	0.636354
			RALGPS1	0.00100309	0.666474
			RBM12B-AS1	0.0281158	0.625746
			RBM41	0.000443837	0.55057
			RBM43	0.00105379	0.592179
			RBPMS2	0.00290971	0.477429
			RCBTB2	0.0423284	0.45563
			RFXAP	0.000443539	0.486828
			RILPL1	0.00640203	0.633883
			RIMBP3C	0.0211635	0.243621
			RIN3	0.000222453	0.430653
			RIPPLY3	0.00044275	0.566824
			RMI2	0.000299429	0.641819
			RNF180	0.0188245	0.468524
			RORA	0.0202124	0.652237
			RP11-1277A3.2	0.00400996	0.458307
			RP11-145E5.5	0.0411508	0.556315
			RP11-156L14.1	0.00599104	0.601422
			RP11-160O5.1	0.0149117	0.497367
			RP11-262H14.1	0.0159162	0.496879
			RP11-262H14.5	0.0212952	0.441424
			RP11-290F24.6	0.0471135	0.507176
			RP11-307C12.12	0.0215149	0.576248
			RP11-316M1.12	0.0247125	0.603282
			RP11-318M2.2	0.0353402	0.646941
			RP11-329A14.1	0.0293193	0.458222
			RP11-341N2.1	0.0409874	0.356247
			RP11-359E3.4	0.0104878	0.572638
			RP11-393I2.4	0.0317687	0.447347
			RP11-428L9.2	0.00243066	0.661174
			RP11-438J1.1	0.0271064	0.617503
			RP11-453F18__B.1	0.00281106	0.55334
			RP11-46A10.4	0.0352941	0.548488
			RP11-46C24.7	0.00641993	0.629348
			RP11-521B24.3	0.0359971	0.532462
			RP11-53B2.3	0.0303362	0.542373
			RP11-54O7.3	0.000412981	0.597848
			RP11-566K11.5	0.0498513	0.229923
			RP11-632K20.7	0.000964451	0.513506
			RP11-67L2.2	0.000104497	0.332739
			RP11-731C17.2	0.0213958	0.644837
			RP11-844P9.3	0.0298969	0.615399
			RP11-91J19.4	0.00932329	0.636145
			RP11-968A15.2	0.0304114	0.439651
			RP9P	0.0042789	0.655375
			RPGRIP1L	0.000619401	0.540484
			SAMD11	0.000217592	0.629481
			SEMA3D	0.0119239	0.613507
			SEPN1	0.00017069	0.577857
			SEPT1	0.0213381	0.510403
			SF3B1	1.4715e-05	0.593165
			SIMC1	0.000231772	0.592655
			SIRPA	0.0213674	0.629989
			SIX1	0.00102395	0.523902
			SKP2	5.10354e-05	0.511542
			SLC12A8	0.00536428	0.615442
			SLC35E4	0.00748427	0.648061
			SLC47A1	0.0330055	0.615374
			SLC4A3	0.00447037	0.601529
			SLC9B2	0.00493119	0.598135
			SMAD6	0.00312334	0.613663
			SMKR1	0.00674871	0.572408
			SOX18	0.00616896	0.451018
			SPEF2	0.00634093	0.535999
			SREK1IP1	0.000180708	0.558003
			SSH1	4.63754e-05	0.568823
			STRADB	0.000158568	0.489891
			STX1B	0.0240247	0.591898
			TBC1D19	0.0224734	0.430394
			TCTN1	0.000179886	0.572465
			TCTN2	0.00242372	0.599747
			TESK1	0.00128394	0.59158
			TET1	0.00590374	0.642433
			TFDP2	0.000170871	0.5952
			TGM2	0.00290053	0.640994
			THSD4	0.000118234	0.655842
			TIMM17B	0.000137139	0.523657
			TK2	0.00339882	0.586834
			TMEM121	0.00674871	0.557738
			TMEM189	4.63754e-05	0.509568
			TMEM8B	0.0133318	0.5872
			TMOD2	0.0020154	0.610843
			TMSB15B	0.00753003	0.628637
			TRAF3IP1	0.000120235	0.520813
			TRAM2-AS1	0.00248764	0.631678
			TRANK1	0.000161081	0.58038
			TRAPPC13	0.00148281	0.665508
			TRDMT1	0.00510799	0.609318
			TRIM68	0.0378998	0.635868
			TSHZ1	0.000338402	0.5704
			TSHZ3	0.0238938	0.622554
			TSPAN3	0.000161081	0.653847
			TTC12	0.00550306	0.6157
			TTC30A	0.000861315	0.610219
			TTC30B	0.000841495	0.639278
			TTC8	1.76877e-05	0.4651
			TUB	0.0118216	0.380472
			TWSG1	0.000129011	0.576205
			TXNRD3	0.000919274	0.5915
			UBAP1L	0.0445316	0.662782
			UBE2L6	0.00321681	0.516137
			ULK2	5.10354e-05	0.54341
			UNC119	0.00116676	0.573453
			VASH1	0.000338402	0.625439
			VASH2	0.0252535	0.647427
			VPS37D	0.00924663	0.526098
			VPS54	0.000188902	0.550542
			WDR66	0.00185769	0.558631
			WDR83	0.000499472	0.632925
			WHAMMP2	0.00466025	0.155389
			WHAMMP3	0.0177758	0.400236
			WNT3	0.00185872	0.511924
			XPA	0.0036865	0.654876
			ZDHHC11B	0.0440057	0.589755
			ZDHHC20	0.000245512	0.570299
			ZDHHC20P4	0.0166527	0.639159
			ZDHHC8P1	0.000313762	0.333623
			ZFP30	0.000158568	0.457739
			ZFX	5.83574e-08	0.194073
			ZFYVE9	0.000296276	0.561066
			ZMYND11	0.000385959	0.650066
			ZNF189	0.000161081	0.541232
			ZNF25	0.0036865	0.639925
			ZNF275	2.75713e-05	0.519919
			ZNF319	0.000120235	0.447932
			ZNF32	7.86874e-05	0.460018
			ZNF343	0.000919274	0.570871
			ZNF354B	0.00155154	0.655471
			ZNF354C	0.000180708	0.575994
			ZNF358	0.0128472	0.662633
			ZNF449	0.00891481	0.654534
			ZNF511	0.000407726	0.572256
			ZNF514	0.000120235	0.586096
			ZNF532	0.000714553	0.508724
			ZNF618	0.000158568	0.520431
			ZNF624	0.00145374	0.664758
			ZNF658	0.025737	0.579687
			ZNF704	0.000619401	0.516837
			ZNF853	0.0395585	0.620448
			ZXDA	0.0152596	0.622282
			ZYG11B	5.4849e-05	0.540429

## Sheet: Table S4C
Supplemental Table S4C. Differentially expressed genes upon ZFX, ZNF711, Both Knock down in MCF-7
Upregulated genes upon ZFX knockdown			Downregulated genes upon ZFX knockdown			Upregulated genes upon ZNF711 knockdown			Downregulated genes upon ZNF711 knockdown			Upregulated genes upon both knockdown			Downregulated genes upon both knockdown
Gene Name	FDR (siZFX vs siCtrl)	Expression change (ratio)	Gene Name	FDR (siZFX vs siCtrl)	Expression change (ratio)	Gene Name	FDR (siZNF711 vs siCtrl)	Expression change (ratio)	Gene Name	FDR (siZNF711 vs siCtrl)	Expression change (ratio)	Gene Name	FDR (siBoth vs siCtrl)	Expression change (ratio)	Gene Name	FDR (siBoth vs siCtrl)	Expression change (ratio)
AC079354.2	0.0419273	1.84698	ABCB10	4.28594e-05	0.593008	ATF3	0.0296046	1.51586	HMGB1P10	0.048754	0.17395	AAK1	1.87746e-05	1.59152	A1BG	0.00132963	0.505028
AC107016.1	0.0493171	2.24298	ABCG1	0.000134988	0.612452	CTD-2369P2.12	0.048754	1.62992	MEIS2	0.00215253	0.634647	AARS	5.19591e-08	1.50201	AADAT	0.000947039	0.662451
ACSL4	0.0461407	1.73008	AC005013.1	0.0445441	0.378304	RP11-667K14.4	0.0490262	1.55522	OSMR	0.00215253	0.601362	ABCC2	0.00706231	1.57825	ABCB10	2.13708e-06	0.558053
ADAMTS9	0.000489057	1.66609	AC007383.3	0.000231788	0.521374				RAB8B	0.00232601	0.569443	ABCG2	4.55077e-06	1.7042	ABHD14B	0.000230171	0.655217
ADD3	0.0239442	1.58102	AC009299.3	0.019625	0.620922				RP11-73M18.8	0.003557	0.54885	AC002398.11	0.0363036	2.43982	ABHD15	1.78352e-06	0.653517
ADM2	2.55872e-05	2.1748	AC012379.1	0.0366838	0.377848				SETD7	0.00020844	0.596124	AC005224.2	0.0465356	2.19794	ABHD8	0.000633076	0.586334
AKR1B10	0.0251514	1.5729	AC015936.3	0.0323459	0.326996				SUMF1	0.000913575	0.645083	AC005562.1	0.00245619	2.17829	ABTB1	0.000450079	0.553486
ALDH3A1	0.00393304	1.70076	AC091171.1	0.0176525	0.291012				ZNF711	0.0303106	0.597891	AC008443.1	0.0278642	4.78419	AC002398.13	0.00282889	0.451972
AMMECR1	2.69003e-07	1.57509	AC104655.3	0.0437081	0.570717							AC010642.1	0.0364863	1.85469	AC004540.5	0.0256221	0.371828
ANGPTL4	0.0167103	1.64338	AC147651.3	0.00766994	0.448024							AC011530.4	0.0180064	5.57942	AC005003.1	0.000103212	0.62427
ARHGAP6	0.0126255	10.3924	ACADSB	0.000104402	0.5983							AC079305.10	0.0227626	1.60987	AC005301.8	0.0150367	0.614425
ATF3	5.66236e-07	2.81828	ACAT1	2.69287e-05	0.60803							AC083899.3	0.0100835	1.57936	AC005944.2	0.0164622	0.641307
BDKRB2	0.000804658	1.67776	ACTA2	0.0293114	0.631409							AC084219.4	0.0250242	1.89487	AC007347.1	0.0375072	0.313534
BEST1	0.0160663	1.50243	ADAP2	0.0116991	0.533388							AC093642.5	0.0280085	1.54111	AC007383.3	4.98761e-05	0.525308
BHLHA15	0.000243448	2.26225	AFAP1L2	3.99973e-06	0.624258							AC097359.1	0.00943806	1.72802	AC007566.10	0.00592588	0.251535
BIRC3	9.55023e-05	2.39679	AKAP7	0.0324948	0.558415							AC132872.1	0.0109554	1.55703	AC009014.3	0.000589124	0.45291
C11orf96	0.00894487	2.13615	AL590822.2	0.032555	0.185248							AC137934.1	0.00732128	2.18198	AC009133.14	0.0203591	0.643825
C2CD4A	0.0248956	2.07367	AMER1	0.00183779	0.642426							AC141586.5	2.60381e-06	1.89922	AC009299.3	0.00319417	0.577739
C3	0.000100252	2.40669	AMIGO1	0.000142563	0.634125							ADAMTS9	1.25704e-05	1.91672	AC010441.1	0.00791574	0.64162
C9orf152	0.0137773	1.55773	AMZ2	1.00678e-06	0.649086							ADAMTSL1	0.046507	1.83823	AC010883.5	0.0294411	0.558997
CALD1	0.0333106	4.66741	ANK1	0.035259	0.631126							ADM	0.0043826	1.52207	AC011322.1	0.0445981	0.479507
CAPN12	0.0162336	1.58133	ANKRD13B	1.36971e-05	0.529047							ADM2	4.64716e-09	4.30393	AC011747.7	0.0139413	0.654002
CASS4	0.0461527	1.63797	ANKRD16	0.000375231	0.577866							ADPRM	0.00879664	1.51998	AC012146.7	0.0212747	0.622744
CDRT4	0.0309128	2.07863	ANKRD52	3.36028e-08	0.518191							AEN	4.01515e-08	1.51638	AC012354.8	0.0395267	0.508612
CHAC1	0.00683526	1.72964	AP001266.1	0.00637538	0.432831							AGAP10	0.00236838	1.55908	AC012358.4	0.0137	0.544211
CNTD2	0.00592742	2.02843	APBA2	0.0136652	0.633461							AGAP7	0.00467004	1.57047	AC013449.1	0.0466239	0.426763
CPEB2	0.000252288	1.5001	APLP1	0.00512066	0.663721							AGPAT9	0.000271761	1.68566	AC016745.3	0.0251492	0.371157
CPEB3	0.00147018	1.54564	ARAP3	0.00999604	0.278543							AHR	6.34339e-07	1.64677	AC017048.3	0.00329698	0.583927
CPNE4	0.0132542	2.72788	ARHGDIG	0.009455	0.650877							AJ271736.10	0.0133169	3.23314	AC017048.4	0.0425161	0.465948
CTD-2369P2.12	0.00365225	1.62523	ARHGEF25	0.000350244	0.502366							AJUBA	9.30427e-09	1.79568	AC027601.1	0.0330383	0.587645
CTD-3148I10.9	0.0472569	8.08768	ARNT2	0.000127102	0.563418							AK4P1	0.0258164	1.50053	AC093627.10	0.0250312	0.532173
CYP1A1	0.00106448	7.1085	B3GNT1	0.000321611	0.605067							AKR1B10	0.00574369	1.64754	AC104655.3	0.013497	0.545725
CYP1B1	0.000655619	1.87626	B4GALT6	0.00240972	0.465262							AKR1C1	0.00434412	1.53767	AC117834.1	0.0100923	0.558461
DDIT3	1.50284e-05	1.65118	BAD	0.000523207	0.640893							AL163636.6	0.0109178	6.08998	AC140481.1	0.0127502	0.607163
DLGAP1-AS2	0.0120074	1.68989	BAI1	0.00409522	0.607634							ALDH1L2	1.72865e-05	3.36626	AC141928.1	0.00295944	0.550678
DNAH5	0.00114255	1.8361	BAI2	0.021499	0.630644							ALDH3A1	0.000536463	1.80702	AC144652.1	0.00175802	0.66576
DNAJB9	4.54292e-05	1.74657	BCL7C	0.00043495	0.646039							ALG2	1.6854e-08	1.67421	AC147651.3	0.0332054	0.557149
DPP4	0.0480501	2.04935	BEND7	0.000295985	0.631783							ALOX12P2	8.16624e-06	2.04315	ACADS	0.000408707	0.596894
DYNC1I1	0.0316557	2.78899	BIVM	0.00217516	0.512954							ALX4	0.0266261	2.44457	ACADSB	8.77243e-07	0.497398
EAF2	0.041775	1.51965	C10orf32-ASMT	0.00556714	0.28668							AMER2	0.00034759	1.7808	ACAT1	3.85747e-06	0.604856
EGF	0.00677611	1.55422	C11orf63	0.019625	0.634474							AMPD1	0.0217577	2.11615	ACD	2.20451e-05	0.559917
FBXO16	0.00598559	1.52914	C15orf59	0.0418819	0.541019							ANG	0.00224012	2.07508	ACOT7	2.47357e-05	0.660758
FKBP14	4.57273e-05	1.85276	C17orf82	0.00284163	0.609976							ANGPTL4	0.022056	1.50884	ACPL2	0.000112971	0.56315
FOSL1	0.0120074	1.62324	C18orf56	0.0425654	0.645223							ANKRD1	1.54205e-05	2.2605	ACTA2	0.000911902	0.497156
FSIP2	0.0437762	2.19755	C19orf12	0.000266277	0.599846							ANXA1	1.97252e-06	1.84759	ADA	0.00114747	0.553
FTH1P11	0.0109598	1.81082	C19orf81	0.0395164	0.664802							AP001468.1	0.0232057	1.65162	ADAMTS19-AS1	0.0254383	0.623795
GDF15	6.81188e-06	1.67357	C20orf201	0.0468746	0.375213							AP003733.1	0.00660109	2.02833	ADAMTS7	0.0054908	0.567879
GEM	0.00129303	1.66794	C2orf72	0.0303895	0.42527							APOL6	0.0237851	1.99344	ADAP2	0.00361857	0.508347
GPX1	0.0154903	7.04145	C5orf42	0.00149015	0.606014							AQPEP	0.000574601	3.56269	ADCK2	1.39705e-06	0.560169
HERPUD1	7.58362e-06	1.63335	C9orf9	0.015192	0.612817							AREGB	0.00377016	1.55846	ADCY3	7.43167e-07	0.599117
HIST3H2BB	0.0198218	2.72778	CAMK1	0.0129191	0.611203							ARFGAP3	3.86848e-07	1.54263	ADCY4	0.0304527	0.326136
HK2	4.23429e-06	1.50095	CAPN15	2.92816e-06	0.662988							ARHGEF34P	0.00249892	1.6085	ADRA2C	4.21178e-06	0.55858
HK2P1	0.0316303	1.99517	CAPRIN2	0.00239269	0.645033							ARID4A	7.26142e-07	1.53595	AES	2.53382e-06	0.614938
HMOX1	5.89884e-07	2.52604	CASKIN1	0.00029168	0.656085							ARL5B	1.49247e-06	1.63975	AFAP1L2	2.71975e-08	0.538556
HSD17B7P2	0.00919433	1.70683	CCDC114	0.031618	0.439906							ARMCX3	6.3655e-09	1.85416	AGBL2	0.0352127	0.660943
HSPA6	0.0454381	2.07961	CCDC30	0.0162438	0.373883							ASNS	4.78548e-10	2.12427	AGPAT2	1.55784e-05	0.664528
ICAM1	4.54697e-06	2.20475	CCDC74A	7.44576e-05	0.665785							ASNSP1	0.000133548	3.08648	AGPAT3	3.23802e-09	0.606167
IER3	8.76529e-05	1.69679	CCDC74B	0.00597102	0.572202							ATF2	3.29192e-09	1.98931	AKAP7	0.0025727	0.463238
IFI6	0.0287398	1.85832	CCDC96	0.0393433	0.565805							ATF3	1.71634e-11	9.57192	AKR7A2	1.1051e-06	0.587955
IFIT1	0.0259222	3.50779	CEP112	0.0202203	0.555696							ATF7IP2	2.0009e-06	1.81641	AL590822.2	0.0220097	0.18084
IFIT2	0.0355188	2.63417	CERS1	0.0142919	0.651387							ATP5G1P4	0.00882333	2.61378	ALDH5A1	1.67206e-07	0.612374
IL6	0.0143855	3.27381	CLIP2	0.00182815	0.660218							BAGE2	0.000148148	1.90639	ALG1L13P	0.0107922	0.282593
IL6R	0.000902159	1.52767	COPZ2	0.0024916	0.485116							BCAS2P2	0.0343367	1.90004	ALKBH6	9.46736e-06	0.662132
INHBE	0.0349519	1.86457	CPNE3	5.2808e-07	0.635633							BCL10	1.17429e-05	1.54811	AMER1	0.000125167	0.595979
IRAK2	9.49303e-05	3.36231	CRTC3	9.93403e-06	0.627453							BCL3	2.02792e-09	2.04114	AMPD3	0.0352486	0.618758
IRF9	0.0168094	1.55674	CRYZL1	0.00434103	0.659762							BDKRB2	4.96837e-07	2.63702	AMZ2	3.66099e-08	0.614694
ITGA10	0.046629	2.02056	CTAGE9	0.00837554	0.455097							BEST1	2.73047e-07	3.52343	ANK1	8.84102e-05	0.394262
ITGAM	0.0131997	1.78474	CTB-113I20.2	0.0139892	0.458228							BET1	9.33043e-06	1.59192	ANKRA2	3.99878e-05	0.654719
JUN	1.47878e-05	1.51264	CTD-2336O2.1	0.00766674	0.554797							BEX2	0.000367465	1.52434	ANKRD13B	9.81252e-07	0.507
KIF5A	0.0348953	2.53966	CTD-3092A11.2	0.000909405	0.463584							BEX5	0.000771006	2.16211	ANKRD16	1.12507e-05	0.509112
KLHDC7B	0.00536907	1.97373	CTSZ	0.00297738	0.633594							BHLHA15	3.30932e-08	5.45095	ANKRD34B	0.0159688	0.635155
KRTAP5-1	0.00843655	1.65132	CYFIP2	3.79689e-07	0.500607							BHLHE40	5.28533e-11	2.96206	ANKRD52	3.57824e-09	0.525283
LAMA3	0.000294656	1.6375	CYP2U1	0.000969797	0.574811							BIRC3	3.14249e-08	4.92099	ANKRD6	0.00349255	0.643566
LL22NC03-N64E9.1	0.0104058	2.83095	CYP46A1	0.00433513	0.547885							BLZF1	6.3655e-09	1.85816	ANKRD9	0.000243276	0.654461
LTB	0.0387801	2.78505	DENND6B	0.0343828	0.657991							BMS1P5	0.0436719	1.6017	ANKS6	7.82426e-08	0.592584
LZTS3	0.00382107	1.53116	DGCR5	0.0100797	0.485246							BRAF	1.45945e-05	1.66364	ANO7	0.000284262	0.627165
MAFF	0.000294656	1.62727	DIRC2	5.2808e-07	0.430621							BRSK1	0.046158	1.62373	AP000350.4	0.0462452	0.661703
MAG	0.0462801	2.09779	DIS3L	4.79623e-07	0.468031							BTN3A1	0.002767	2.30342	AP000439.2	0.0396521	0.367647
MAP1B	0.000155239	1.64794	DMTN	8.22615e-06	0.476216							C10orf118	1.49247e-06	1.58361	AP000439.3	1.85298e-05	0.563088
MOSPD2	0.000170063	1.54275	DOK1	0.00882606	0.643015							C11orf96	2.22381e-06	5.74981	AP000695.6	0.0243809	0.452538
NEURL3	0.0197434	2.95043	DPY19L1P1	0.0310227	0.664395							C12orf4	4.24145e-07	1.73866	AP001266.1	0.0017939	0.442367
NKX3-1	0.0457043	1.89561	DPYSL4	0.000632078	0.623245							C15orf48	7.77309e-05	1.79702	APBA2	0.000524794	0.542125
NMNAT2	0.0181053	1.56986	DTX4	0.00127366	0.654845							C16orf46	0.00740444	1.64667	APCDD1	0.0172754	0.567629
NR4A1	0.000192739	1.81401	DUSP7	0.00894722	0.647738							C17orf107	4.08354e-05	1.9996	APLP1	0.000102004	0.55917
NR4A3	7.16762e-05	2.16862	ECHDC3	0.00150217	0.50265							C1GALT1	1.21688e-06	1.5851	APOA1BP	9.20529e-06	0.61812
NUPR1	0.00698472	1.90922	EID2B	0.0164752	0.538606							C1orf27	2.2177e-07	1.59846	ARAP3	0.00180304	0.280978
OAS1	0.00414682	1.89095	EIF2AK4	1.2549e-07	0.577698							C1orf51	7.74629e-05	1.51298	ARHGDIB	0.0196062	0.631803
OAS2	0.0115183	3.31664	EML1	1.67576e-06	0.662036							C1orf54	0.00393243	1.67229	ARHGDIG	0.000116475	0.524563
PLA2G4C	0.00257847	1.82417	EPHA10	0.000702959	0.649004							C2CD4A	0.000493683	3.41078	ARHGEF19	2.89998e-05	0.648313
PMF1-BGLAP	0.028791	2.25732	ERHP1	0.0201263	0.388137							C3	3.78508e-07	3.62059	ARHGEF25	2.14736e-05	0.452201
PPM1E	0.000843834	1.58456	ERP27	0.021768	0.652506							C6orf132	2.54625e-07	1.56174	ARL2	1.12284e-05	0.615395
PPP1R15A	1.57239e-05	1.60401	EVA1B	0.00401905	0.615858							C8orf4	0.0110191	2.22084	ARMC2	0.0304861	0.589704
PTAFR	0.00620094	1.89552	EXOC5	1.15277e-06	0.630535							CALR	2.22174e-08	1.56142	ARNT2	4.55163e-06	0.506283
PTGR1	0.000138462	1.57613	EYA2	0.000994794	0.582048							CAP2	2.92967e-06	1.6259	ARSA	0.00286209	0.656661
PTPRH	0.00906293	2.25552	FAM110B	0.0175625	0.663646							CCDC163P	0.000641987	1.81847	ARSB	0.000147351	0.615707
RAET1L	0.0274643	3.35933	FAM189B	1.22609e-05	0.623142							CCDC17	0.0144311	1.67706	ASIC1	0.000608897	0.60894
RASD1	3.4766e-06	2.30907	FAM19A5	8.27942e-05	0.484479							CCDC174	1.83406e-08	1.98282	ATG10	0.00213981	0.647558
RELB	3.35935e-05	1.7871	FAM201A	0.000278829	0.565511							CCDC65	0.00361857	2.24297	ATP5G3	1.43493e-07	0.615461
RGS16	0.00224254	1.55072	FAM203B	0.0245051	0.566029							CCDC66	7.21212e-05	1.73656	ATP6V0E2	1.83406e-08	0.484334
RHCG	0.0281391	1.78509	FAM20C	4.57273e-05	0.555675							CCDC7	0.0155	1.67373	ATP6V1B1	0.00643305	0.620131
RND1	0.00084361	1.61504	FAM211B	0.0135798	0.567929							CCDC88A	0.0382082	1.86198	ATP6V1F	6.08633e-06	0.632808
RP11-1012A1.4	0.0186476	3.65135	FAM228B	0.0101422	0.540628							CCL2	0.000572022	9.42104	AUTS2	0.0480694	0.656545
RP11-234B24.6	0.0250212	1.92379	FAM58A	2.55872e-05	0.561083							CCNA1	0.00624475	3.46684	B3GALT4	0.000930771	0.648104
RP11-264B14.1	0.0448967	2.79948	FAM66C	0.0100315	0.44997							CCNYL1	2.65747e-07	1.64346	B3GNT1	7.55464e-07	0.453361
RP11-2C24.4	0.0178676	4.36248	FAM83F	0.00882405	0.638815							CCRN4L	6.14053e-09	2.3255	B4GALT6	0.000641409	0.450169
RP11-334L9.1	0.00866099	1.57619	FAM92A1	7.44576e-05	0.537119							CCT6P1	0.000276004	1.70923	BAD	3.51047e-06	0.526112
RP11-353N14.2	0.0395164	1.61063	FAM92A1P1	0.00277848	0.268691							CCT6P3	1.47212e-05	1.66114	BAI1	0.000367889	0.55611
RP11-469E19.1	0.0118509	1.62841	FAS	0.00114286	0.527256							CD22	0.0160328	1.53294	BAI2	0.00077195	0.51303
RP11-500M8.7	0.00150437	1.51941	FAXC	0.0105675	0.510701							CD55	4.9616e-08	1.59171	BAIAP2-AS1	6.408e-06	0.619484
RP11-54O7.14	0.00827247	1.61318	FBXO17	0.000348652	0.455201							CD83	0.000840115	1.87749	BAK1P1	0.0430924	0.655209
RP11-589M4.1	0.00133969	3.76328	FBXO41	1.79437e-05	0.61431							CDADC1	0.00427613	1.50553	BCAS4	0.000139084	0.65398
RP11-60L3.1	0.0148645	2.29181	FBXO44	6.38572e-05	0.457379							CDC6	2.2417e-07	1.60841	BCL7C	7.43164e-07	0.491189
RP11-656D10.6	0.0411939	3.29327	FBXO6	1.95117e-05	0.362							CDR2	1.48126e-07	1.8092	BCYRN1	1.562e-06	0.549685
RP11-680A11.5	0.0470417	2.01899	FBXW4	5.65028e-06	0.589001							CDRT1	0.0151242	1.62926	BEND7	0.000124792	0.650469
RP11-727A23.5	0.0346686	1.59228	FN3K	0.000329464	0.575769							CDRT4	0.000235566	3.28391	BIN2	0.0491784	0.490119
RP11-801F7.1	0.0225684	2.87321	FRS3	0.0381187	0.638781							CEBPB	6.11883e-10	2.10285	BIVM	6.74916e-06	0.338435
RP13-88F20.1	0.0170641	1.77669	FSBP	0.0399511	0.394361							CEBPG	5.16595e-09	1.80419	BLOC1S1	4.31745e-06	0.612598
SDCBP2	0.0101499	1.54906	FURIN	6.00948e-05	0.641771							CEP95	4.75784e-08	1.61951	BMPR1APS1	2.91558e-05	0.460759
SDR16C5	0.00159276	1.6751	GABBR1	0.00441886	0.558585							CHAC1	3.71916e-06	3.18395	BOLA2	0.0357564	0.534286
SEZ6	0.00867994	4.63245	GABBR2	0.000960999	0.508195							CHD2	1.65282e-08	1.88223	BTBD2	1.49247e-06	0.649134
SIGLEC15	0.000367505	1.64125	GALNT16	0.00690414	0.564914							CLCN6	2.56212e-05	1.54451	C10orf32-ASMT	0.00105076	0.256323
SLC1A1	0.0196617	1.77284	GAS6	0.0372616	0.644							CLDN1	1.01927e-06	2.82516	C11orf35	0.00600696	0.57592
SLC6A9	1.22609e-05	1.63271	GBAS	7.73284e-07	0.560509							CLGN	0.0010361	1.88418	C11orf45	0.0264843	0.545798
SLC7A11	1.95117e-05	2.24424	GDF1	0.0218067	0.598485							CLIP4	0.00437691	1.58208	C15orf59	0.0115135	0.502205
SLC7A11-AS1	0.0399511	2.07439	GFI1	0.0155893	0.590025							CLK1	1.38472e-08	1.68543	C16orf13	1.63823e-05	0.548407
SLC7A5	0.000142763	1.65788	GJD3	0.0192042	0.579696							CLK4	7.35583e-07	1.66232	C16orf59	1.0516e-06	0.546719
SNTB1	0.00501369	2.82187	GNAZ	0.000305651	0.561831							CLUHP3	7.49863e-05	1.52092	C16orf74	6.08633e-06	0.581246
ST3GAL1	0.000142563	1.5516	GNG4	0.00566358	0.651746							CNOT4	9.23301e-06	1.63209	C16orf93	0.00399299	0.645684
STRA6	0.000140712	2.77945	GOLGA6A	0.00318307	0.184441							CNST	4.57979e-07	1.63615	C17orf82	0.000158507	0.53709
STX11	0.0408974	2.11136	GOLGA8I	0.0203242	0.408541							CNTD2	8.15795e-05	2.85426	C17orf89	2.6524e-05	0.641814
TBC1D3	0.00954313	1.55329	GPR143	0.00188511	0.613276							COG3	9.28667e-08	1.7724	C18orf56	0.00933179	0.603363
TBC1D8B	0.025364	1.69059	GPR27	0.000522808	0.662511							COQ10B	6.12861e-06	1.51532	C19orf12	0.000154492	0.631619
TCF7	0.0472569	1.88336	GPR68	0.00166883	0.645434							CPEB1	0.0185359	1.84018	C19orf57	0.00299626	0.660389
TDH	0.0132542	1.59571	GRIN3B	0.0492506	0.598937							CPEB2	3.17098e-09	2.89967	C19orf70	0.000826414	0.663166
TNF	0.000406688	2.96275	GSC	0.00255132	0.629104							CPEB3	3.36514e-07	2.50801	C1orf220	0.0431588	0.56687
TNFAIP2	0.000140177	1.59986	H6PD	1.79437e-05	0.60725							CPEB4	2.07796e-06	2.03381	C1orf233	8.52629e-06	0.618817
TNFAIP3	6.00948e-05	2.29732	HLA-F-AS1	0.0170047	0.556766							CPNE4	0.00896453	2.49088	C1QBP	1.3975e-07	0.657783
TYW1B	0.0197038	2.03907	HOXA4	0.0122953	0.567459							CREB3L2	1.18725e-05	1.56569	C1QL1	0.00257417	0.597903
ZEB1	0.0022247	2.53683	HOXA5	0.00414181	0.565605							CREB5	0.00190425	5.68253	C1R	0.00124609	0.408176
ZNF347	0.0062394	1.7101	HOXA7	0.00205166	0.451782							CREBRF	9.94076e-08	2.29878	C20orf197	0.0262287	0.503449
ZNF555	0.0231362	1.52397	HOXB6	0.0452519	0.416418							CRELD1	6.90874e-05	1.56213	C21orf119	0.00155467	0.66387
ZNF571	0.0170641	1.51889	hsa-mir-8072	0.0480989	0.63195							CRELD2	6.63071e-07	1.53353	C2CD4C	0.00426659	0.609905
ZNF711	0.00784748	1.50739	HTR7P1	0.017365	0.591573							CSF1	3.02724e-06	2.72073	C2ORF15	0.000123127	0.648639
ZNF763	0.046833	1.70754	HTRA1	6.64253e-05	0.527489							CSGALNACT2	8.55029e-05	1.5079	C2orf54	0.00750838	0.633148
			ICA1L	0.000727895	0.610218							CSRNP1	2.37889e-09	2.46926	C2orf72	0.00933961	0.385867
			IDNK	0.0100515	0.63223							CTA-797E19.2	0.0452941	4.31031	C4orf48	0.000284192	0.662414
			IFIT5	0.00113338	0.593063							CTB-119C2.1	0.00665783	1.78415	C5orf38	4.59969e-05	0.623288
			IFT57	6.41876e-06	0.574659							CTC-479C5.17	0.0344542	2.63783	C5orf42	0.00136552	0.646168
			IFT74	1.22609e-05	0.541154							CTC-487M23.8	0.00243595	2.97738	C6orf226	0.000960032	0.56089
			INVS	0.000105351	0.64516							CTC-534A2.2	0.000253282	1.70459	C6orf52	0.0454261	0.588498
			IRF5	0.000101666	0.58674							CTD-2008P7.9	0.00264056	2.02278	C6orf57	0.000115996	0.636635
			KBTBD11	0.000289149	0.531877							CTD-2033A16.1	0.0137011	7.30821	C9orf142	1.41905e-05	0.602037
			KCNAB2	1.88444e-06	0.508084							CTD-2541M15.4	0.0303816	3.50295	C9orf66	0.00491412	0.386287
			KCNH2	3.73166e-05	0.452507							CTD-2547E10.2	0.000199319	2.30465	CA11	0.0041983	0.613387
			KCNJ8	0.0108193	0.581599							CTD-2626G11.2	0.01198	1.8739	CABLES2	2.97615e-08	0.620177
			KIAA1257	0.0146118	0.644995							CTD-3064H18.1	0.0474696	1.87189	CACNA2D2	0.00152474	0.535073
			KIAA2022	0.0245762	0.397052							CTTNBP2NL	4.19013e-05	1.52228	CACNG6	1.29476e-05	0.408857
			KLHDC9	0.0094603	0.488922							CWC22	1.07611e-06	1.58931	CADM4	1.91077e-06	0.576721
			KLHL23	0.000633711	0.620611							CYLD	1.66815e-06	1.71291	CALHM3	0.0385626	0.579118
			KLRG2	0.000189939	0.498846							CYP1A1	4.38163e-06	15.9533	CALML5	2.33991e-06	0.490609
			KRBA1	0.0022553	0.592822							CYP1B1	4.19303e-06	2.42634	CAMK1	0.000781259	0.529313
			KTN1-AS1	0.0154461	0.60053							CYP1B1-AS1	0.0133457	2.01242	CAMK2N1	1.39675e-07	0.574579
			LDB3	0.0188108	0.503897							CYP51P2	0.0157384	1.78052	CAMK2N2	0.00266953	0.613606
			LIFR-AS1	0.02545	0.434209							CYR61	2.34033e-06	1.81828	CARS2	2.58719e-05	0.638203
			LIMD2	0.000348652	0.532087							DAPP1	0.000305563	5.54034	CASC10	0.0151548	0.604981
			LINC00284	0.00140259	0.361907							DCP1A	4.67395e-06	1.52306	CASKIN1	1.07611e-06	0.528721
			LINC00537	0.0256437	0.621764							DCUN1D3	5.37659e-06	1.53783	CCDC103	0.00642136	0.550481
			LINC00659	0.0123118	0.404152							DDIT3	1.71634e-11	4.62089	CCDC114	0.0421384	0.526287
			LINGO1	0.000239011	0.538158							DDIT4	4.08635e-07	1.57135	CCDC34	5.05413e-05	0.611666
			LONRF1	4.79623e-07	0.448515							DDR2	0.0327817	2.4636	CCDC61	0.000124792	0.603765
			LRP3	8.14978e-06	0.510547							DDX43	0.000625166	1.50575	CCDC69	1.8635e-05	0.602882
			LRRC10B	0.00676888	0.581381							DDX58	5.2799e-05	2.51819	CCDC74A	4.8338e-08	0.501264
			LRRC27	0.000718978	0.536643							DDX60	0.000237659	5.31773	CCDC74B	0.000272761	0.484225
			LRRC41	3.7937e-09	0.451848							DDX60L	0.0277798	1.68018	CCDC85A	7.20796e-05	0.630534
			LRRK1	0.000470891	0.599233							DLGAP1-AS2	3.0269e-06	3.4847	CCDC85B	3.99878e-05	0.617172
			LRRN2	0.00184886	0.6067							DLX2	0.00102523	1.83351	CCNE1	0.000151806	0.640173
			LRWD1	2.97264e-07	0.534285							DNAH5	6.73516e-05	2.06322	CD302	0.0344542	0.586484
			LTBP2	0.0100006	0.634197							DNAJB11	8.97335e-10	1.78092	CDC42EP5	0.0252376	0.664535
			LYRM9	0.000100252	0.376419							DNAJB4	2.68363e-05	2.43617	CDCA4	3.90832e-06	0.601839
			MAGEE1	0.00098582	0.301003							DNAJB9	2.77146e-10	4.53435	CDIPT	3.99633e-06	0.624411
			MAGI2	0.0255998	0.378633							DNAJC2	9.23504e-08	1.51023	CDK14	0.000223667	0.58143
			MAN2A2	1.2549e-07	0.59202							DNAJC3	1.60372e-07	1.70955	CDKN1C	0.0100558	0.39723
			MAP6	0.000523207	0.1034							DTX2P1-UPK3BP1-PMS2P11	0.0379261	2.38591	CDPF1	0.00682913	0.537628
			MAP9	0.000113108	0.618345							DTX3L	5.37008e-05	1.6506	CEBPA	2.7062e-05	0.624336
			MAPK11	0.0175625	0.660399							DUSP1	1.71634e-11	3.18019	CEBPA-AS1	0.00200364	0.55429
			MAPK12	0.0238959	0.652723							DUSP10	5.23871e-05	1.87259	CEP112	0.00932521	0.554524
			MED28	6.82324e-07	0.556001							DUSP16	7.29432e-09	1.98359	CEP19	0.00197931	0.575006
			MGAT5B	0.000507931	0.458126							DUSP8	3.93547e-08	1.87832	CEP68	9.04117e-06	0.613294
			MIEF2	0.00119099	0.643997							DYNC1I1	0.0344126	2.35824	CERS1	0.00135523	0.589596
			MST1P2	0.0184173	0.388361							EAF2	0.000316715	2.19913	CERS4	0.000135316	0.653218
			MTERFD3	0.000174716	0.606356							EDN1	5.32073e-05	1.62704	CFD	0.00815887	0.644009
			MVB12B	8.88881e-07	0.336189							EFNA1	1.0032e-06	1.55457	CHAF1B	1.36882e-06	0.649808
			N4BP2L1	0.014486	0.457075							EGF	1.55522e-05	2.22787	CHCHD6	0.000117873	0.568519
			NFATC4	0.0184325	0.530319							EGR1	4.77212e-10	2.73062	CHRD	0.000277464	0.578578
			NMNAT3	0.0329026	0.501924							EGR2	0.041883	2.04498	CHST14	1.71707e-06	0.582112
			NPAS3	0.0371363	0.494251							EGR3	4.91272e-06	1.53261	CHURC1-FNTB	0.0479636	0.600552
			NPEPL1	1.23879e-07	0.54363							EGR4	0.000964867	6.02542	CISD3	1.38694e-05	0.60359
			NPIPA1	5.19708e-05	0.661568							EID3	0.0145094	2.34709	CLEC11A	7.33346e-05	0.50689
			NPIPP1	0.00100615	0.594181							EIF2AK3	4.25802e-09	2.12951	CLEC3A	0.00124565	0.608918
			NSMAF	6.82324e-07	0.614495							ELL2	7.72514e-07	1.52806	CNIH2	7.29792e-05	0.606548
			NT5C3B	3.32306e-05	0.638206							ELL3	5.42066e-05	1.50315	COCH	7.82222e-05	0.52871
			OAF	0.0107371	0.642769							EOMES	0.00609435	2.00074	COL27A1	0.000114922	0.62199
			OPLAH	0.00239475	0.630212							ERN1	2.90819e-08	1.84982	COL4A3	0.0439273	0.662325
			OSCP1	0.00181065	0.414599							ERO1LB	0.000430602	2.08351	COL9A2	0.000604047	0.636148
			PALD1	0.0176423	0.459318							ERRFI1	4.58967e-09	2.23066	COPZ2	0.00521767	0.566071
			PARD6A	0.00815194	0.638233							ESCO1	5.58062e-08	1.69501	CORO1A	3.32996e-07	0.517602
			PARP16	1.10423e-05	0.599886							ESF1	4.38958e-06	1.57391	CORO2A	1.06973e-05	0.642469
			PAX5	0.00740715	0.499309							ETS2	8.13226e-09	1.93659	COX17P1	0.0113038	0.595985
			PDCD7	0.000100155	0.650235							EYA3	1.61742e-05	1.50759	COX20P1	0.0364863	0.138309
			PDIA2	0.0319832	0.630531							FAM129A	0.00326289	2.2844	CPAMD8	0.0463026	0.566032
			PDZD4	0.00047345	0.642605							FBN1	0.000298606	1.70003	CPNE3	1.12153e-08	0.592693
			PELI3	2.50799e-05	0.533661							FBXO16	7.88057e-06	2.22552	CPOX	0.000271931	0.666666
			PGBD5	0.021988	0.660434							FBXO30	8.46336e-05	1.5269	CPQ	0.00816038	0.448944
			PIGZ	0.011203	0.599068							FBXO32	1.40824e-06	1.86018	CRIP2	1.38528e-06	0.584317
			PINK1	0.000242336	0.635244							FBXO48	0.0120112	1.73443	CRLF1	0.00109815	0.64351
			PITX1	0.000151215	0.66601							FGD6	0.000125043	1.59866	CRYL1	0.000109174	0.617376
			PKD1P1	0.00650061	0.657732							FICD	6.08183e-08	2.47414	CTA-293F17.1	0.0497141	0.428656
			PLEKHF1	0.0161957	0.460575							FKBP11	1.6201e-08	1.84777	CTA-313A17.3	0.0251716	0.64126
			POMGNT1	1.12083e-07	0.578182							FKBP14	5.02717e-09	3.4381	CTA-445C9.14	0.00696092	0.626016
			POMGNT2	0.000140712	0.614961							FLRT3	6.4404e-07	1.96513	CTB-113I20.2	3.08547e-05	0.235745
			PPM1M	0.0201257	0.637335							FNDC3B	3.86309e-09	2.4886	CTB-167G5.5	0.00013802	0.241328
			PRRT4	0.0131	0.414204							FOSB	4.79505e-06	2.86458	CTB-33O18.3	0.033557	0.536259
			PSD	0.00484293	0.622442							FOSL1	7.09314e-06	2.78634	CTC-203F4.2	0.0248572	0.363285
			RAB11FIP5	3.40532e-05	0.504619							FOSL2	2.32517e-08	1.6977	CTC-246B18.8	0.0469036	0.39444
			RAB36	0.000108077	0.37955							FOXN2	3.87349e-05	1.52482	CTC-435M10.3	0.0356155	0.655583
			RBM41	0.000156317	0.646227							FRMD4B	1.18314e-07	2.29461	CTD-2194D22.3	0.00037303	0.329734
			RBPMS2	0.0155598	0.585285							FTH1	1.36882e-06	1.50125	CTD-2228K2.5	1.11931e-05	0.568078
			REEP2	0.032137	0.61595							FTH1P11	0.0146649	1.63604	CTD-2228K2.7	4.03849e-05	0.652502
			RFXAP	0.00597524	0.650846							FTH1P2	8.9019e-07	1.66525	CTD-2284J15.1	0.0390233	0.627435
			RIN3	6.11196e-06	0.450335							GAB2	4.99527e-07	1.76523	CTD-2287O16.5	0.0331083	0.595144
			RIPPLY3	0.000100155	0.606377							GABARAPL1	9.46736e-06	2.10056	CTD-2292P10.4	0.000935949	0.475312
			RMI2	9.49303e-05	0.654383							GADD45A	6.11883e-10	2.82046	CTD-2308L22.1	0.0178069	0.572293
			RNF185-AS1	0.0113288	0.343294							GADD45B	6.52811e-08	1.54984	CTD-2319I12.3	0.0342869	0.382717
			RP11-1055B8.4	0.024905	0.645863							GADD45G	0.000470136	1.54617	CTD-2336O2.1	0.0067341	0.5757
			RP11-110G21.1	0.0277528	0.642961							GALK2	1.72355e-06	1.71495	CTD-2366F13.1	0.0049303	0.566387
			RP11-1186N24.5	0.00546354	0.496162							GARS	3.57824e-09	1.5999	CTD-2410N18.5	0.045548	0.651311
			RP11-154H23.3	0.040705	0.478032							GBP2	0.00184791	1.56476	CTD-2540B15.13	0.000530244	0.432449
			RP11-15H20.5	0.00200648	0.658215							GCLM	6.64639e-06	1.57393	CTD-2547L24.4	0.00236866	0.439189
			RP11-229P13.20	0.0493282	0.373181							GCNT2	0.00209845	2.59631	CTD-2574D22.2	0.0495483	0.648887
			RP11-262H14.5	0.0142285	0.477991							GDF15	5.12293e-08	1.95987	CTD-3074O7.5	0.00167974	0.599347
			RP11-263K19.4	0.00687381	0.421331							GEM	4.25802e-09	5.01404	CTD-3092A11.2	0.000829121	0.515738
			RP11-298I3.5	0.0039506	0.400945							GFPT1	5.45737e-09	2.06911	CTSF	0.000151654	0.573099
			RP11-316M1.12	0.0003983	0.613285							GMPPB	3.65891e-06	1.56283	CTSH	1.26927e-07	0.550671
			RP11-319G6.1	0.0121363	0.517529							GOLGA4	1.91781e-08	1.66459	CTSZ	0.00115454	0.638031
			RP11-338H14.1	0.0196187	0.34171							GOLPH3L	4.08785e-09	1.89788	CTXN1	0.000413664	0.66626
			RP11-351I21.11	0.0385154	0.457454							GORAB	2.62286e-07	1.89357	CXorf24	0.00771173	0.58728
			RP11-395P17.11	0.0443208	0.315432							GOSR2	1.06443e-07	1.51163	CYB5D2	1.52435e-05	0.624779
			RP11-396C23.2	0.0158733	0.462156							GPATCH11	7.8965e-06	1.53707	CYBA	3.24118e-05	0.660425
			RP11-407N17.5	0.0440917	0.635333							GPCPD1	1.79762e-06	1.63939	CYFIP2	4.23238e-09	0.431569
			RP11-46C24.7	0.00370487	0.615964							GPR75-ASB3	3.6992e-06	1.62079	CYP2U1	1.35197e-05	0.468316
			RP11-505K9.1	0.00505657	0.602661							GPR89A	0.000391881	1.56532	CYP46A1	0.00461094	0.595436
			RP11-521B24.3	0.024139	0.447502							GTPBP2	9.0272e-09	1.77273	DAB2IP	9.30043e-07	0.631834
			RP11-54O7.3	4.28594e-05	0.652817							GULP1	2.14659e-06	1.67759	DCTPP1	7.17002e-06	0.658314
			RP11-55K13.1	0.0373671	0.529547							HBEGF	3.5862e-06	2.91191	DDB2	1.05023e-06	0.66431
			RP11-574F21.2	0.0433573	0.403686							HBP1	3.15287e-08	1.62902	DEGS2	0.000170855	0.575704
			RP11-600F24.7	0.00474213	0.658431							HCFC2	8.07808e-06	1.99433	DENND6B	0.0163023	0.662297
			RP11-632K20.7	0.00188364	0.524366							HCG27	0.00994988	2.98379	DEXI	2.30152e-05	0.638111
			RP11-67L2.2	0.0101187	0.537573							HDX	0.0136227	2.25976	DGCR5	0.00867444	0.520579
			RP11-706O15.7	0.0405667	0.161479							HELB	0.0101566	1.55944	DGCR6L	2.32343e-05	0.643429
			RP11-707P17.2	0.010501	0.405257							HERPUD1	1.71634e-11	4.09747	DICER1-AS1	0.0145673	0.645963
			RP11-783K16.14	0.0468424	0.139728							HES1	3.18405e-09	1.78969	DIRC2	5.05153e-08	0.425488
			RP11-88H9.2	0.00272968	0.57094							HIST1H1D	0.000257863	2.3869	DIS3L	5.13701e-08	0.472085
			RP11-91J19.4	0.0346686	0.636682							HIST1H1E	0.000223506	2.84989	DLG5-AS1	0.0172129	0.516196
			RP11-932O9.9	0.0201875	0.218525							HIST1H1PS1	0.0405307	2.56665	DLX1	0.000172639	0.622183
			RP4-792G4.2	0.00649739	0.363821							HIST1H2AD	0.0133457	3.01305	DLX4	0.000833558	0.622899
			RP9P	0.000913117	0.629641							HIST1H2AK	0.00289967	3.98837	DMC1	0.0428215	0.646045
			RSPH1	0.0251177	0.642739							HIST1H2BO	0.0436603	2.03357	DMTN	2.58251e-08	0.341546
			RYR1	0.00453342	0.536347							HIST1H3D	0.00604409	2.08754	DNAJC19P9	0.0103337	0.604054
			SAMD11	4.57273e-05	0.58795							HIST1H3E	0.00545122	1.74069	DNAJC8P1	0.0319768	0.501497
			SAT2	0.000389874	0.555668							HIST1H4E	0.000272688	2.7229	DNASE1L2	6.60682e-05	0.64738
			SEMA4F	0.0021404	0.632498							HIST2H4A	4.67592e-07	1.51066	DNPH1	1.11408e-05	0.603177
			SEPN1	1.27208e-06	0.64743							HIST2H4B	3.36928e-07	1.6001	DOK1	0.000945074	0.583626
			SFT2D3	0.0146672	0.120477							HIST3H2BB	0.00776992	2.72406	DOK4	6.0627e-06	0.606762
			SHISA8	0.0448793	0.365543							HIVEP1	9.57888e-05	1.52451	DOLK	3.63164e-06	0.631439
			SIX1	0.00313624	0.589792							HIVEP2	8.44237e-07	2.33675	DPM3	0.000682368	0.642345
			SKIDA1	0.0359998	0.615259							HK2	1.93183e-07	1.56882	DPP7	2.28761e-06	0.617252
			SKP2	6.11196e-06	0.570113							HMGCS1	5.28473e-08	1.5704	DPY19L2	0.0298791	0.405459
			SLC25A44	4.58337e-07	0.616986							HMOX1	1.43353e-09	3.82503	DPYSL4	7.05335e-05	0.593617
			SLC27A5	0.0268406	0.66614							HNRNPCP1	0.0241918	2.40514	DPYSL5	0.000265221	0.496383
			SLC35E4	0.0190712	0.661452							HOXB9	0.000220794	2.50949	DRAP1	2.73796e-06	0.641651
			SLC47A1	0.00868219	0.550283							HRK	1.21492e-05	2.53646	DTD2	4.33002e-08	0.525257
			SLC4A3	0.000753025	0.551983							HSD17B7	3.78103e-05	1.615	DTX4	9.43954e-06	0.535011
			SMKR1	0.000571999	0.47719							HSD17B7P2	1.68692e-06	3.35884	DUSP23	0.000223506	0.609122
			SOX18	0.00684154	0.52918							HSP90B1	4.39942e-09	2.00074	DUSP7	0.000436553	0.562274
			SPATA18	0.00129118	0.656742							HSP90B3P	0.00662698	6.13375	DUSP9	0.00257241	0.583829
			SPEF2	0.00404581	0.470727							HSPA13	4.57901e-09	1.79455	E2F1	1.21688e-06	0.655583
			SPSB4	0.00205325	0.421802							HSPA5	2.16952e-10	2.79139	ECHDC3	8.0814e-05	0.435585
			SREK1IP1	0.000100252	0.651279							HSPA6	0.00120893	3.19326	EDN2	0.00299515	0.49778
			SRF	5.2808e-07	0.646734							HYOU1	1.37909e-09	2.15965	EFHD2	4.20806e-07	0.637825
			STAT4	0.0431456	0.534576							ICAM1	5.20482e-10	4.73525	EFNA3	0.000635356	0.664193
			STAT5B	9.06647e-05	0.650619							IER3	1.76624e-07	2.23208	EGFL7	1.01746e-05	0.529808
			STON1	0.0151815	0.590349							IER5	4.8782e-07	1.55078	EID2B	0.00536688	0.530437
			STRADB	0.000113723	0.543993							IFI27	0.00032521	2.5261	EIF2AK4	1.08889e-08	0.576984
			SYDE1	0.00898725	0.547682							IFI6	5.734e-05	3.43177	ELFN1	0.00014538	0.563192
			TCTN1	1.31259e-05	0.555317							IFIH1	0.000111524	2.0983	EMILIN1	0.0338445	0.587634
			TCTN2	0.000369109	0.596836							IFIT1	6.71007e-05	10.5048	EML1	1.12153e-08	0.581658
			TESK1	5.30173e-07	0.513681							IFIT2	0.000105176	6.69286	EN2	0.000237659	0.655806
			THAP3	0.00154251	0.594183							IFIT3	0.000454129	7.45135	ENDOG	2.07796e-06	0.590817
			THAP4	5.65028e-06	0.665166							IFRD1	1.65282e-08	1.91578	ENKD1	0.00237347	0.662664
			TIGD5	0.000100252	0.560531							IGFL1	0.000563508	4.82657	ENSAP2	0.0134493	0.660653
			TIMM17B	1.23879e-07	0.404691							IGFN1	0.0177903	2.29268	EPHA10	9.35505e-05	0.629396
			TK2	0.0116764	0.608478							IKZF5	1.39705e-06	1.86092	EPHX2	0.00998392	0.644163
			TMEM115	4.25305e-06	0.626435							IL32	5.19504e-05	3.27955	EPM2A	0.00235865	0.634355
			TMEM121	9.06647e-05	0.434836							IL6	0.000139693	7.59597	ERP27	0.00432642	0.608771
			TMEM129	0.000344546	0.653654							IL6R	7.43164e-07	2.16176	EVA1B	4.73039e-05	0.489492
			TMEM189	2.22817e-09	0.453417							IL6ST	8.85287e-08	2.01964	EXT2	6.19271e-07	0.637553
			TMEM189-UBE2V1	0.000896155	0.546407							IL8	0.00217591	7.47913	EYA2	3.70366e-05	0.513906
			TMEM62	0.00134787	0.6602							IMPA1	0.000105176	1.55687	F12	0.00082059	0.640629
			TMEM8B	0.00443839	0.479994							ING3	2.09823e-05	1.60535	FAAH	8.63162e-05	0.649594
			TMOD2	0.00294304	0.552797							INHBE	1.19846e-05	4.81356	FAHD2B	0.04383	0.597095
			TMPRSS6	0.0302833	0.541057							INO80	4.96837e-07	1.51373	FAM101B	0.00292208	0.569979
			TOLLIP-AS1	0.0447697	0.574773							INTS4L2	0.0152122	8.8509	FAM109A	3.51567e-05	0.597325
			TP53I13	0.000233723	0.651816							INTS6	2.22174e-08	1.94261	FAM115D	0.0497482	0.126398
			TRAF3IP1	0.000462628	0.643492							INTS6P1	0.00349312	2.08348	FAM171A1	0.010179	0.650439
			TRANK1	0.000293338	0.606636							IRAK2	3.15287e-08	9.13971	FAM173A	1.39846e-05	0.6061
			TRIM74	0.0423364	0.218245							IRF1	8.42086e-08	2.16504	FAM174A	6.79074e-05	0.655084
			TRNP1	0.0133986	0.64472							IRF7	3.67952e-06	1.63597	FAM189B	3.46777e-07	0.575749
			TRPV3	0.000310026	0.628897							IRF9	3.67476e-06	2.79229	FAM195A	6.64639e-06	0.581074
			TSPAN33	0.000182746	0.565798							ISG20	4.4619e-07	1.9348	FAM195B	9.73416e-05	0.624912
			TTC12	0.00590374	0.565565							ISL2	0.0458917	1.89331	FAM19A5	1.8635e-05	0.497993
			TTC8	5.2808e-07	0.534962							ITCH	4.56146e-07	1.53726	FAM201A	1.66796e-05	0.519748
			TUSC1	5.57883e-05	0.556409							ITGA10	0.0211444	2.11128	FAM203B	0.000457821	0.404371
			TXNRD3	2.12704e-05	0.47746							ITGAM	0.000906939	2.0912	FAM20C	4.54168e-06	0.54119
			ULK2	3.03734e-06	0.566428							ITPKC	2.40401e-07	1.6807	FAM210B	2.78055e-08	0.568224
			UNC119	4.25305e-06	0.569863							IZUMO1	0.0227133	1.77725	FAM211B	0.00352083	0.525059
			VAX2	0.00385171	0.589992							JMJD6	3.38291e-09	2.27161	FAM213B	3.16592e-07	0.5764
			VDAC1P6	0.0285303	0.613686							JUN	1.71634e-11	3.48935	FAM228B	0.0156199	0.605623
			VMO1	0.0339789	0.456279							KBTBD8	0.00139681	1.60955	FAM43A	7.77309e-05	0.554827
			VPS37D	0.00305132	0.501161							KCND1	0.0335988	1.63813	FAM58A	1.77174e-06	0.538287
			VWA1	0.00290267	0.653438							KCNV1	0.0325041	2.00472	FAM66C	0.0100606	0.509249
			WDR83	6.81188e-06	0.494907							KDM3A	3.32996e-07	1.554	FAM69B	8.85326e-05	0.596432
			WHAMMP3	0.00899546	0.446527							KDM6B	1.33717e-08	2.32798	FAM78A	0.000102299	0.576825
			WNT3	0.00960294	0.567418							KIAA0319	1.45831e-06	2.10833	FAM89B	0.000120096	0.548756
			WNT5B	0.00783448	0.463474							KIF4B	0.027659	1.52066	FAM92A1	2.0009e-06	0.478229
			WTIP	0.00136307	0.585557							KIF5A	0.00113241	4.29092	FAM92A1P1	0.0285528	0.469211
			WWTR1-AS1	0.0260675	0.41211							KIN	1.16208e-06	1.62332	FAM98C	7.10993e-05	0.65675
			XKR8	0.00260753	0.636603							KLF10	1.35801e-09	2.21271	FAS	0.000854291	0.563852
			YPEL1	0.0147117	0.551377							KLF2	4.03849e-05	1.873	FAXC	0.000478158	0.404693
			ZDHHC20	0.000506994	0.642101							KLF6	1.71634e-11	2.65993	FBLN1	0.00197776	0.604303
			ZDHHC24	0.000443367	0.621258							KLHDC7B	4.65435e-07	5.34097	FBXL14	0.000534345	0.634705
			ZDHHC8P1	0.0195454	0.492966							KLHL15	0.00049283	1.50171	FBXO17	1.70232e-06	0.31775
			ZFP30	8.62607e-06	0.504116							KLHL28	6.34339e-07	1.65369	FBXO2	0.000285308	0.596905
			ZFX	2.22817e-09	0.273014							KMO	0.0200095	2.66958	FBXO41	2.02766e-07	0.535823
			ZNF189	0.000119771	0.613317							KRT16	0.000311268	1.85829	FBXO44	3.994e-06	0.425396
			ZNF275	1.186e-06	0.543817							KRT17	0.00672172	1.96432	FBXO6	2.33979e-06	0.358586
			ZNF319	8.62607e-06	0.414871							KRTAP5-1	2.06713e-06	3.14733	FBXW4	9.71491e-07	0.597658
			ZNF32	0.000235221	0.622145							KRTAP5-2	0.00188765	2.91273	FBXW4P1	0.0348492	0.578895
			ZNF469	0.000225105	0.602761							KRTAP5-AS1	6.79382e-08	2.50359	FERMT1	0.00409569	0.637597
			ZNF511	4.58594e-06	0.565371							LAMA3	9.36862e-05	1.60146	FKBP1C	0.0232068	0.49097
			ZNF514	0.000443367	0.633305							LAMC2	1.52169e-05	1.61783	FN3K	0.000107497	0.589332
			ZNF517	0.00132199	0.638152							LAMP3	0.0400261	1.98187	FOXD2	0.0466208	0.620912
			ZNF618	0.000143314	0.648396							LARP1B	9.7094e-09	1.99613	FOXD2-AS1	0.0240802	0.481256
			ZNF688	0.000375231	0.643867							LARP1P1	0.00718317	7.47283	FOXF1	0.0118359	0.42796
			ZNF704	0.000157041	0.615206							LCN2	0.0093353	2.27773	FRAT2	6.64687e-07	0.615716
			ZNF853	0.0106292	0.53954							LIF	8.63665e-08	2.30625	FRS3	0.00614118	0.584442
			ZYG11B	0.000181055	0.652456							LIG4	1.45952e-05	1.54038	FSD1	0.000750639	0.644566
												LINC00243	0.0236475	1.82703	FUCA1	1.08877e-06	0.620808
												LINC00346	0.013982	1.87388	FZD8	0.000653067	0.627803
												LINC00473	0.013965	4.43668	G6PC3	1.29955e-05	0.659455
												LINS	4.54242e-06	1.64433	GABBR2	0.000436185	0.527836
												LIPG	0.00267995	2.41927	GALK1	4.1025e-05	0.63612
												LMCD1	0.00125971	1.57983	GALNT16	0.000223344	0.455353
												LMCD1-AS1	0.0164562	2.09781	GAMT	0.00189891	0.477159
												LNP1	0.0118701	1.53933	GAPDHP1	0.0114258	0.620202
												LONRF3	0.00710962	1.96296	GAREML	0.0181801	0.476786
												LRIF1	1.22888e-07	1.72608	GAS2L1	8.27829e-05	0.624295
												LRRC8B	0.000101241	1.56547	GAS6	0.00196481	0.540093
												LRRFIP1P1	1.03571e-05	1.67388	GBAS	1.45393e-07	0.570131
												LSMEM1	0.00291217	2.19568	GCHFR	0.00330501	0.633525
												LTB	0.0104882	3.20461	GDF1	0.00976517	0.5983
												LUCAT1	0.0383781	2.00265	GFI1	0.000353633	0.463108
												LURAP1L	3.18405e-09	2.52747	GFRA3	0.0207768	0.571538
												LYSMD3	3.87437e-09	2.11026	GGN	0.0414079	0.504167
												LZTFL1	7.05096e-07	1.89604	GID4	7.86217e-05	0.657814
												MAFF	1.07417e-09	4.14669	GIT1	2.42472e-07	0.627965
												MAFG	6.40836e-08	1.96225	GJD3	0.0125474	0.593205
												MAFK	2.67261e-08	1.65519	GLTPD1	2.99832e-06	0.659698
												MAG	0.0279585	2.05663	GLTPD2	0.00515953	0.514165
												MANF	6.50793e-08	2.07534	GNAZ	4.06197e-06	0.466197
												MAP1B	7.10398e-08	2.48085	GNB1L	9.1238e-05	0.545064
												MAP1LC3B	8.34831e-10	1.88376	GNG10	2.38111e-05	0.489813
												MAP3K9	2.77143e-05	1.50051	GNG4	0.00107888	0.626691
												MAPK6	2.8193e-08	1.64376	GOLGA8B	0.000862055	0.662477
												MARS	1.65282e-08	1.50902	GPLD1	0.0348204	0.589115
												MATN1-AS1	0.000409679	1.69666	GPR125	1.39607e-07	0.619632
												MBNL2	5.59265e-06	1.51518	GPR135	0.00225573	0.527697
												MCAM	0.0273427	1.9326	GPR143	8.06283e-05	0.545768
												MCPH1	1.91077e-06	1.60433	GPR153	1.22299e-05	0.648919
												MED13L	0.000160381	1.50355	GPR161	0.00894205	0.408637
												MEF2B	0.0317445	1.60179	GPR27	4.35956e-06	0.558633
												MEF2D	3.51047e-06	1.50977	GPR68	1.41597e-06	0.442105
												MGAT2	5.30837e-08	1.79071	GRHPR	1.67434e-06	0.659343
												MIR22HG	1.08877e-08	2.58559	GRIN1	1.75646e-05	0.586926
												MIS12	3.35374e-07	1.67378	GRIN2D	0.00130049	0.493044
												MITF	0.000189887	1.74953	GRIN3B	0.0186603	0.581575
												MOB3C	0.000103696	1.55927	GRM4	0.000484282	0.651393
												MOSPD2	2.30368e-06	1.76027	GSAP	8.73175e-05	0.548027
												MPP3	0.000542473	1.50658	GSC	0.000169444	0.575269
												MSANTD3-TMEFF1	0.0264476	1.66051	GSK3A	8.92879e-07	0.665708
												MSTO1	1.70232e-06	1.57901	GSTM4	0.000448761	0.634014
												MSTO2P	0.00454588	1.64005	GYG2	0.00086017	0.638676
												MTHFD2	4.43977e-09	1.65378	H6PD	1.67206e-07	0.519225
												MTHFD2P7	0.0392865	1.71783	HADH	3.60925e-05	0.661265
												MTO1	2.44665e-07	1.59173	HAGH	1.29799e-05	0.638808
												MX1	8.97884e-05	2.61817	HAGHL	5.51814e-05	0.665414
												MX2	0.0241102	2.98693	HCAR1	4.8927e-05	0.597702
												MXD1	1.79797e-09	2.02231	HCG11	0.000341312	0.663463
												MYH16	0.0389726	1.8057	HCK	0.00624694	0.658094
												MYO7A	0.000787012	2.29243	HDAC11	2.94489e-06	0.575383
												MYSM1	5.40312e-05	1.57986	HDDC3	0.000124186	0.660022
												NAB1	2.98022e-05	1.54955	HEBP1	9.66774e-06	0.63639
												NABP1	3.0269e-06	1.64724	HES2	0.00315998	0.588105
												NAMPTL	4.64841e-05	1.54377	HES4	0.000287862	0.652093
												NCOA7	3.33476e-05	1.53446	HES6	4.30949e-05	0.587183
												NCR3LG1	6.78567e-05	2.09489	HLA-DRB1	7.12331e-05	0.625808
												NEAT1	9.06918e-07	1.96112	HLA-DRB6	0.0396182	0.651885
												NEDD4L	1.19778e-06	1.53528	HLA-F-AS1	0.0318572	0.642795
												NEK1	1.62214e-05	1.60766	HNRNPA1P10	0.00326173	0.652039
												NEURL3	0.000826573	4.62881	HOTAIR	0.0173912	0.635782
												NFAT5	0.00610631	1.55397	HOXA-AS2	0.0201538	0.414004
												NFE2L2	1.61767e-08	1.83329	HOXA10	5.76553e-05	0.567729
												NFIL3	4.23238e-09	2.24345	HOXA3	0.0177935	0.419201
												NFKB2	2.75637e-11	2.51038	HOXA4	0.00011896	0.40904
												NFKBIA	4.33002e-08	1.50918	HOXA5	0.00364624	0.608985
												NFKBIE	9.2399e-07	1.72006	HOXA6	0.0067341	0.359327
												NFXL1	9.13926e-06	1.61219	HOXA7	0.00511898	0.531074
												NGFR	0.00731351	1.56714	HOXB6	0.00163189	0.279874
												NHSL2	0.00259144	2.75425	HOXB7	1.44998e-05	0.529351
												NKX3-1	0.0373048	1.73181	HOXC-AS1	0.0356208	0.381627
												NMD3P1	0.0245624	1.68279	HOXC11	3.07866e-05	0.54609
												NPIPB7	0.0417057	2.52639	HOXC9	0.000602862	0.564283
												NPM1P26	0.0296467	2.90614	HOXD-AS1	0.0238552	0.608355
												NR1D1	5.51983e-05	1.6806	HOXD8	0.0231432	0.450534
												NR4A1	3.17098e-09	4.56415	HPCA	0.0253624	0.548673
												NR4A2	7.3649e-08	1.77417	HPGD	0.000538682	0.636873
												NR4A3	3.18405e-09	5.71817	HPS6	2.73531e-06	0.552428
												NRBF2	3.00202e-07	1.66153	HS3ST5	0.000109454	0.614423
												NRBF2P3	0.0214999	2.48125	HTR7P1	0.0171574	0.638449
												NSUN6	0.00369234	1.59211	HTRA1	3.77889e-07	0.412485
												NTN4	5.4797e-07	1.88019	IAH1	4.19748e-05	0.655528
												NTNG1	0.0395166	2.95733	ICA1L	0.000360538	0.633626
												NUAK2	2.25145e-05	1.85289	IDNK	0.00251435	0.615326
												NUCB2	1.01013e-07	1.68899	IFI27L2	0.00279983	0.59666
												NUPR1	5.05413e-05	2.85255	IFT74	2.99426e-05	0.629243
												NUS1P1	0.00862002	1.70862	IGFBP2	0.000147423	0.666251
												OAS1	3.09948e-06	3.42457	IGFBP5	5.65657e-08	0.602062
												OAS2	1.84748e-05	9.24059	IGFBP6	0.0311108	0.571926
												OAS3	0.000217607	1.64744	IGFBPL1	0.0132135	0.602865
												OASL	0.00475266	1.88593	IGSF8	2.83229e-05	0.6163
												OPTN	1.02992e-08	1.79046	IL10RB-AS1	0.00732204	0.242072
												OSGIN1	1.02429e-07	1.79496	IL17D	2.41015e-06	0.548088
												OVGP1	0.00223561	2.7704	IRF5	0.000210155	0.665648
												PALLD	2.40401e-07	1.60588	IRX4	0.000261659	0.60634
												PAPOLG	1.95092e-05	1.52452	ITGB6	2.34033e-06	0.588474
												PARM1	3.72934e-05	1.66928	ITPKA	0.00762715	0.584859
												PARP12	0.000384528	1.56237	JOSD2	0.000276753	0.649582
												PARP9	0.00924162	1.50417	KB-1507C5.2	0.00625801	0.557217
												PCDH19	0.0338713	1.82295	KB-1562D12.1	0.0123124	0.550753
												PDIA4	8.67234e-09	1.54736	KBTBD11	7.88057e-06	0.459817
												PDPK2	0.000274574	1.98637	KCNC1	0.025351	0.35033
												PEAR1	0.00406728	3.20966	KCNH2	6.3376e-06	0.460631
												PELI1	0.000348584	1.59353	KCNH3	0.0336566	0.602301
												PER1	1.65574e-06	1.8072	KCNIP3	0.0109178	0.513548
												PER2	8.48313e-05	1.52204	KCNJ4	0.0462821	0.499636
												PGM2L1	1.57532e-06	1.68437	KCNJ8	0.000282441	0.465252
												PGM3	1.05855e-07	1.71452	KCTD18	2.64957e-06	0.636857
												PHF21B	0.039523	1.72046	KHK	0.000623991	0.560638
												PHLDB2	2.99789e-05	1.66805	KIAA0930	3.77889e-07	0.603926
												PIGA	2.16617e-08	2.25934	KIAA1257	0.00656914	0.637922
												PINLYP	0.00808661	1.9991	KIAA1875	0.000163248	0.616672
												PLA2G4C	3.05378e-07	3.95057	KIAA1984	0.0110933	0.537583
												PLAU	0.00608872	1.63507	KIAA2022	0.00520265	0.363791
												PMAIP1	2.26464e-07	1.84357	KIF26A	2.31439e-05	0.642583
												PMF1-BGLAP	0.0059739	2.76365	KIT	0.00746516	0.618192
												PNPLA8	4.64716e-09	2.03875	KLHDC8B	0.00835106	0.660684
												PNRC1	2.77146e-10	2.00514	KLHDC9	0.000765187	0.423435
												POC5	1.1957e-07	1.7167	KLHL22	9.62209e-06	0.635453
												POLR3B	2.44471e-05	1.53503	KLHL23	1.22299e-05	0.538019
												POMZP3	0.0341621	1.50211	KLRG2	1.85593e-05	0.476478
												POU2F2	0.00300253	2.41827	KRBA1	9.07735e-05	0.519561
												PP2D1	0.0285222	1.91223	KRT222	0.00543166	0.646653
												PPM1E	3.23468e-07	2.47129	KRT81	5.17929e-07	0.595202
												PPP1R15A	3.92451e-11	3.82802	KRT83	3.24103e-07	0.58205
												PPP1R18	1.65282e-08	1.96247	KRT86	2.4009e-06	0.559396
												PPP4R1L	7.73152e-07	1.8127	KTN1-AS1	0.0211913	0.658111
												PRDM1	0.0492241	2.26599	L3MBTL3	0.0236084	0.656679
												PRRT3-AS1	0.0329	3.1059	LA16c-60H5.7	0.00734714	0.358998
												PTAFR	0.000867668	2.08017	LDLRAD4	2.1027e-07	0.544662
												PTBP2	1.3628e-07	1.88082	LEPREL2	0.00350671	0.351368
												PTGR1	9.05436e-07	1.87042	LFNG	8.84831e-07	0.627336
												PTPRH	0.00111598	2.52521	LGR4	3.83958e-05	0.661127
												PVT1	1.16386e-07	1.54329	LHX2	0.000126989	0.599643
												PYGM	0.0250501	2.07091	LIFR-AS1	0.00442549	0.372981
												PYROXD1	0.000102562	1.58218	LIMD2	5.80885e-06	0.446516
												R3HCC1L	3.40965e-06	1.5542	LINC00086	0.00322176	0.439639
												RAB24	5.40317e-06	1.51494	LINC00094	1.72076e-06	0.576287
												RAB39B	0.000204385	1.50387	LINC00271	0.0484826	0.505955
												RAB9A	1.72076e-06	1.70376	LINC00284	1.48871e-05	0.233383
												RAET1K	0.00911073	2.41452	LINC00461	0.00372439	0.56077
												RAET1L	0.00111598	5.65114	LINC00537	0.000648817	0.495397
												RANBP6	3.55848e-05	1.52823	LINC00659	0.0100923	0.454932
												RASD1	2.4687e-10	5.82484	LINC00883	0.00525023	0.539638
												RASSF1	6.40248e-08	2.04112	LINC00885	0.0120664	0.52517
												RBM24	6.5139e-06	1.57137	LINC01006	0.0103358	0.570993
												RBM48	2.98e-06	1.56765	LINC01023	0.0396521	0.518932
												RBM7	9.57283e-06	1.60753	LINC01024	0.0184177	0.585087
												RDH16	0.0058527	1.94639	LINGO1	1.45738e-05	0.497298
												REC8	5.63062e-05	2.04208	LIPT2	0.00111937	0.551663
												REL	0.0099915	1.57176	LMTK3	9.93842e-06	0.622576
												RELB	3.38291e-09	3.2223	LONRF1	3.80553e-05	0.659756
												RGPD1	0.0014403	1.75306	LOXL3	0.001699	0.614784
												RGPD2	0.000552668	2.06522	LPIN3	2.51908e-07	0.654497
												RGS16	1.64189e-06	2.32434	LPPR3	0.00868587	0.576413
												RGS20	0.0286053	2.26827	LRFN1	0.000761744	0.637049
												RHCG	2.73673e-05	3.44258	LRFN3	1.44522e-06	0.55091
												RHOV	2.32204e-07	2.10719	LRP3	1.01013e-07	0.431016
												RIOK2	4.03762e-06	1.53484	LRRC10B	0.000411637	0.503908
												RIOK3	4.17799e-08	1.63736	LRRC26	0.000467267	0.547643
												RIT1	3.32996e-07	1.72297	LRRC27	0.00033582	0.55328
												RLF	2.32991e-06	1.76127	LRRC41	4.77212e-10	0.446261
												RMRP	0.0463755	2.15381	LRRC45	2.71393e-06	0.63847
												RND1	1.74784e-07	2.68683	LRRC61	0.000398378	0.610459
												RND3	4.64716e-09	1.96444	LRRC73	0.00428618	0.548769
												RNF111	1.73024e-06	1.7704	LRRK1	0.000642409	0.656848
												RNFT1	1.14173e-08	1.76045	LRRN2	0.000165307	0.569704
												RNFT1P3	0.00410255	1.85557	LRWD1	1.98308e-08	0.526975
												RP1-20B21.4	0.0144489	5.88681	LSM7	0.000307361	0.662146
												RP1-313I6.12	5.91626e-05	2.70751	LSMD1	3.12729e-05	0.658613
												RP11-1100L3.8	0.0302867	2.69931	LTBP2	0.000358564	0.539276
												RP11-111F5.4	4.03849e-05	1.85194	LTC4S	0.00771627	0.331555
												RP11-1148O4.1	0.0495483	1.50594	LY6D	0.000160197	0.463596
												RP11-114F3.5	0.034389	2.55088	LY6E	3.17202e-05	0.652834
												RP11-120K9.2	0.0392865	2.19368	LYPD1	5.21624e-05	0.620076
												RP11-134G8.6	0.0229576	2.63309	LYRM9	3.37084e-05	0.401804
												RP11-1407O15.2	1.2749e-05	1.73925	MACROD1	0.000964062	0.663615
												RP11-152N13.5	0.0231885	1.56344	MAF1	9.46736e-06	0.652579
												RP11-153M3.1	0.0130671	1.75703	MAFG-AS1	0.0424654	0.614219
												RP11-199F11.2	0.00567771	1.63586	MAGEE1	0.000900925	0.351512
												RP11-206L10.2	0.00173546	1.78896	MAGEF1	6.7795e-07	0.656633
												RP11-206L10.5	0.000576771	2.40936	MAGI2	0.00861103	0.368448
												RP11-20I23.13	0.000111128	1.71664	MALSU1	9.36862e-05	0.643167
												RP11-20I23.6	0.0489086	1.70201	MAN2A2	1.45393e-07	0.659804
												RP11-20I23.8	0.00177973	1.67802	MANEAL	1.03571e-05	0.658327
												RP11-212P7.3	0.0215654	1.84058	MAP6	0.00190528	0.192278
												RP11-215G15.5	0.00125118	1.99499	MAP9	3.35424e-05	0.632997
												RP11-23J9.4	0.0259375	2.81704	MAPK12	0.00244649	0.576378
												RP11-24B19.3	0.0338274	1.60363	MAPK8IP1	1.84993e-07	0.585868
												RP11-252A24.2	0.00347342	1.54509	MARCH2	0.000956737	0.611976
												RP11-262H14.4	0.00498336	1.50803	MARCKSL1	1.52942e-06	0.635238
												RP11-282O18.6	0.0387277	3.12609	MAST4-AS1	0.00209793	0.391829
												RP11-290L1.3	0.0127001	1.65334	MBD3	2.94226e-05	0.630911
												RP11-2C24.4	0.000146889	11.7249	MDK	1.77174e-06	0.611622
												RP11-309G3.3	0.0085206	1.79975	MDP1	0.0286944	0.648514
												RP11-325K4.2	0.00196163	4.30042	MESP1	0.000378371	0.383917
												RP11-325K4.3	0.000710214	7.47318	METRN	4.08219e-06	0.531266
												RP11-334L9.1	7.14213e-07	3.22931	MFSD3	6.1847e-05	0.587471
												RP11-345J4.8	0.00453169	1.80936	MGAT5B	0.00141519	0.563727
												RP11-347C12.2	3.72762e-05	2.1907	MIEF2	1.98588e-05	0.549577
												RP11-370B11.1	0.00496674	1.69856	MIF	3.16197e-05	0.665866
												RP11-375I20.6	0.0190061	2.4993	MINOS1-NBL1	0.0100139	0.612112
												RP11-37B2.1	0.000636452	1.55766	MIR205HG	0.010698	0.525867
												RP11-384K6.6	0.00482055	1.71731	MMP11	0.0010255	0.276108
												RP11-399D6.2	0.00414606	1.96653	MNX1	1.8262e-07	0.567492
												RP11-409C19.2	0.00969503	1.85983	MNX1-AS1	0.00260433	0.584533
												RP11-417L19.2	0.0418926	2.10147	MOB1A	6.53896e-08	0.66308
												RP11-427H3.3	0.000272473	1.5183	MORN1	0.00419195	0.665613
												RP11-442H21.2	0.00860422	1.55219	MOSPD3	0.000128861	0.653189
												RP11-443P15.2	0.000148615	4.28527	MPG	1.83212e-06	0.576599
												RP11-45M22.4	0.00654359	10.4299	MRPS24	4.13179e-05	0.65642
												RP11-463D19.2	0.0130797	9.0851	MSMB	0.000613738	0.55655
												RP11-464F9.1	0.0148232	2.92635	MSRB2	2.58334e-05	0.639393
												RP11-468E2.4	0.0413835	1.72311	MST1	0.00236838	0.622683
												RP11-479G22.8	0.0132452	1.84979	MT-TA	0.00560354	0.561975
												RP11-48B3.3	0.0283804	2.15377	MT-TC	4.42609e-07	0.584735
												RP11-512M8.3	0.0205219	1.52872	MT-TG	0.0227626	0.580125
												RP11-574K11.28	0.0301468	2.23131	MT-TN	0.000108873	0.619059
												RP11-60L3.1	0.00201882	2.69541	MT-TP	0.0184472	0.439863
												RP11-618G20.1	0.0104813	2.03118	MT-TY	9.81911e-06	0.620435
												RP11-642P15.1	0.0298885	2.25898	MTATP6P1	0.0466314	0.609494
												RP11-645C24.2	0.00380024	1.60222	MTX1P1	0.0362733	0.39762
												RP11-680A11.5	0.0207666	2.13795	MVB12B	1.61767e-08	0.272476
												RP11-700P18.1	0.00210334	1.55554	MXD3	5.29491e-05	0.639748
												RP11-708J19.1	0.0236312	1.68781	MYCN	0.0249184	0.582254
												RP11-727A23.5	0.00161595	1.88344	MZT2A	1.21688e-06	0.590761
												RP11-745O10.2	0.0178973	2.96291	MZT2B	1.31864e-05	0.573975
												RP11-77H9.2	0.00125377	2.05902	N4BP2L1	0.0255594	0.520078
												RP11-791G15.2	0.0273487	2.65683	NAE1	4.715e-07	0.663465
												RP11-801F7.1	0.00243917	4.06225	NAT8L	2.99832e-06	0.614042
												RP11-815I9.4	0.0109747	1.62434	NCS1	4.93775e-08	0.637809
												RP4-539M6.19	0.0482427	2.26637	NDRG2	1.11185e-06	0.488647
												RP4-575N6.2	0.0431011	1.89806	NDST2	0.000296977	0.649343
												RP4-607J23.2	0.000697688	2.34532	NDUFA13	3.74655e-05	0.663588
												RP4-781K5.2	3.07109e-06	1.5996	NDUFA8	1.34809e-06	0.593084
												RP5-1021I20.4	0.0108821	3.53791	NENF	3.14844e-06	0.529143
												RP5-1050D4.3	0.00400937	8.78945	NEURL	0.00445486	0.661317
												RP5-837I24.1	0.0216516	2.34193	NFATC4	0.00108675	0.441017
												RP5-857K21.1	0.0455912	2.13568	NICN1	0.00339165	0.560346
												RP6-65G23.1	0.0220191	2.24282	NLRX1	6.48829e-05	0.555496
												RRBP1	2.4355e-07	1.50501	NME3	0.000201883	0.63863
												RRP12	2.20562e-07	1.55801	NME4	4.0906e-07	0.569764
												RSRC2	8.22681e-10	1.97205	NOX5	0.0480919	0.6443
												SAMD4A	1.20351e-06	1.70641	NPAS3	0.0164413	0.474188
												SAMD9	0.000349861	1.76205	NPDC1	1.28235e-05	0.647865
												SAT1	2.19697e-07	1.6763	NPEPL1	3.18405e-09	0.502126
												SCFD1	4.88734e-07	1.53035	NPHP1	0.0368252	0.657162
												SDCBP2	7.71236e-05	1.99942	NPIPA7	0.0010356	0.388985
												SDE2	6.98094e-05	1.58565	NPIPP1	0.00223448	0.665843
												SDF2L1	3.39179e-07	1.76586	NPNT	7.7492e-09	0.527655
												SDHAP2	0.0428341	5.44396	NPTX1	0.0368384	0.47682
												SDR16C5	0.00106473	1.59295	NPTXR	3.24103e-07	0.590484
												SEC11C	2.32522e-06	1.62606	NREP	0.000569184	0.547252
												SEC24A	4.43977e-09	1.94388	NRG3	0.00268306	0.568847
												SEC24D	3.17098e-09	2.6356	NRSN2	8.28754e-05	0.666605
												SELK	3.86848e-07	1.89469	NSMAF	1.95926e-08	0.571285
												SERP1	2.87797e-08	1.52985	NT5C1B	0.0207646	0.425883
												SERPINB8	3.51567e-05	1.84753	NT5C3B	1.82887e-07	0.537646
												SERPINE2	0.00697303	1.92169	NTHL1	0.000374483	0.628877
												SESN2	4.66413e-10	2.18482	NUDT1	0.000113657	0.654387
												SETX	6.27355e-05	1.50815	NUDT18	0.000849209	0.650811
												SEZ6	0.00422432	4.45371	NUDT22	1.21807e-05	0.649723
												SGPP2	0.00145617	1.65101	NUDT8	0.00012213	0.61717
												SH2D5	0.0199838	1.63814	NYNRIN	0.000150397	0.557621
												SIRT1	3.09622e-07	1.73596	OAF	0.00071979	0.577205
												SLC10A7	0.000449496	1.66327	OBSL1	3.56599e-07	0.643622
												SLC17A9	0.0389356	2.2896	OGFRL1	1.69349e-05	0.614824
												SLC1A4	1.9682e-06	1.79712	OLFM2	0.000217596	0.645494
												SLC2A6	1.02867e-05	1.71164	OPLAH	0.000808816	0.636578
												SLC30A7	4.99172e-06	1.66374	OPRL1	0.0468304	0.56732
												SLC33A1	8.68252e-08	1.63358	OSBPL5	2.94226e-05	0.646242
												SLC39A14	1.99965e-06	1.58074	OSCP1	4.96862e-05	0.317798
												SLC3A1	0.0497028	2.15721	PABPC1L2B	0.0487254	0.560227
												SLC3A2	6.11883e-10	2.27857	PADI3	0.0106206	0.507538
												SLC41A2	2.70821e-06	1.63296	PALD1	0.0325418	0.567828
												SLC51A	0.0190337	1.57837	PALM	3.73158e-06	0.599409
												SLC6A9	3.14249e-08	2.04824	PAQR4	2.39013e-06	0.611494
												SLC7A11	5.45737e-09	4.33076	PARD6A	8.91159e-05	0.507946
												SLC7A11-AS1	7.12331e-05	5.10648	PARP16	1.38528e-06	0.595251
												SLC7A5	3.20798e-08	2.63844	PARP3	0.041445	0.630962
												SLC7A5P1	0.00199792	2.41322	PASK	3.93117e-06	0.634686
												SLC7A5P2	0.0123079	2.83317	PAX5	0.0225681	0.602146
												SLCO5A1	0.0325733	2.82082	PAXIP1-AS1	1.9654e-05	0.534302
												SMG1P1	0.00254435	1.95348	PCBP4	0.000362524	0.632082
												SMOC1	0.01341	3.08511	PCDHGC4	0.0378863	0.515372
												SMOX	6.52863e-06	1.79034	PCTP	1.36882e-06	0.66411
												SNAI1	0.000118182	1.87793	PDE4A	0.00405699	0.62571
												SNHG12	4.04585e-05	1.54017	PDIA2	0.0159743	0.633791
												SNHG17	2.41381e-06	1.66578	PDK2	1.36304e-05	0.64342
												SNIP1	1.91799e-07	1.57642	PDZD4	2.82426e-05	0.599909
												SNTB1	0.00196163	2.83261	PECR	0.000791273	0.665591
												SNX16	1.21334e-05	1.54465	PELI3	8.37999e-07	0.486758
												SPAG9	1.3983e-07	1.75677	PGBD5	4.77113e-05	0.446706
												SPDYE9P	0.00276576	7.68499	PGLS	0.000721136	0.655918
												SPRY4	0.000845518	2.10323	PHC1	0.000849112	0.664101
												SPTY2D1	7.70137e-08	1.57403	PIDD	0.000189787	0.656056
												SQSTM1	1.37909e-09	1.83639	PIGX	4.44498e-07	0.640088
												SRGAP2C	0.0285263	1.57854	PIGZ	0.00196163	0.559796
												SRP19	1.67546e-06	1.54615	PINK1	5.4848e-06	0.570605
												SSR3	1.1753e-08	1.7256	PIPOX	0.0485486	0.383055
												STAG3L5P-PVRIG2P-PILRB	0.000199358	1.768	PITX1	1.05023e-06	0.567891
												STARD4	2.53763e-06	2.35677	PKIG	0.00101382	0.60709
												STK38L	3.65046e-07	1.62037	PLA2R1	0.00443264	0.490071
												STK40	2.97615e-08	1.68895	PLEKHG4B	0.00860166	0.465842
												STRA6	3.95274e-06	3.45857	PLLP	4.73064e-05	0.561796
												STRN3	3.41296e-07	1.51153	PLXNA4	0.00347719	0.617681
												STX11	0.000932707	3.40229	PNPLA4	0.000462681	0.600313
												STX1A	8.94797e-07	1.65666	PODXL2	8.79732e-05	0.649734
												STX3	1.12271e-08	1.75436	POMGNT1	2.84256e-08	0.617885
												STX5	4.90281e-07	1.58989	POMGNT2	8.75004e-06	0.581622
												STYK1	0.000403844	1.90639	PORCN	0.00457076	0.664852
												SVILP1	0.0197852	2.22228	PPIAP29	0.00444072	0.0911156
												SYNE3	0.00250743	2.0338	PPM1F	8.03948e-07	0.629956
												SYNJ1	4.38199e-05	1.71555	PPM1M	0.00233791	0.568195
												SYT13	0.0485486	1.64782	PPOX	0.00238168	0.62392
												SYVN1	1.1212e-06	1.5728	PPP1R14C	0.0437477	0.61843
												TAF1A	0.000219138	1.83907	PPP1R26-AS1	0.000389044	0.613789
												TAF1D	6.46187e-07	1.59633	PPP1R35	0.000110702	0.638331
												TAF4B	0.00124409	1.50786	PPP1R3C	0.0020101	0.644856
												TAP1	2.41381e-06	1.65083	PRDX2	6.10805e-07	0.648303
												TARS	1.57605e-08	1.63803	PRELID2	0.000172854	0.612617
												TBC1D3	0.000133462	1.92904	PRIMA1	0.0262165	0.62796
												TBC1D8B	0.00110683	2.09353	PRKCD	3.20604e-08	0.609115
												TBX3	1.06411e-05	1.88012	PROCA1	0.00772409	0.645987
												TCEANC	0.00208109	1.62679	PROM2	3.04732e-07	0.644959
												TDH	0.00111677	1.79076	PRRG2	0.000730051	0.60852
												TECPR1	2.14659e-06	1.58381	PRRT4	0.00313087	0.387926
												TES	1.62051e-08	1.92395	PRRX2	0.00108331	0.433219
												TEX14	0.00549337	1.58373	PSCA	0.00490588	0.664101
												TGDS	0.000485817	1.67036	PSEN2	6.48829e-05	0.657513
												TGIF1	1.45393e-07	1.5072	PTGFRN	3.53296e-08	0.606255
												TGM1	0.00840093	1.51006	PTK7	3.92982e-07	0.615706
												THAP1	2.74465e-05	1.61217	PTPRU	2.8045e-06	0.639499
												THAP2	7.39326e-05	1.7939	PXK	0.000582492	0.664245
												THAP9-AS1	2.02766e-07	1.62052	PYCARD	2.89879e-05	0.646532
												TIAM2	2.81267e-05	2.05671	PYGO1	0.0364278	0.512468
												TICAM1	7.18111e-07	1.85154	PYURF	0.0292845	0.625961
												TIPARP	3.50265e-07	2.05133	QTRT1	1.4155e-05	0.662475
												TLCD2	0.0295111	1.84677	RAB11FIP3	3.7478e-07	0.65485
												TLR6	0.0171746	3.23146	RAB11FIP5	1.0447e-05	0.530065
												TMCO3	1.26927e-07	1.52048	RAB1C	0.00635527	0.493927
												TMEM106A	0.0455049	1.56393	RAB26	0.000308052	0.589645
												TMEM39A	8.42048e-09	2.08533	RAB36	2.78859e-06	0.310709
												TNF	2.47407e-07	7.33933	RAB40B	9.07735e-05	0.57727
												TNFAIP2	1.37198e-08	2.64758	RAB4B-EGLN2	0.00594654	0.546044
												TNFAIP3	3.72797e-09	5.89599	RABL5	1.26927e-07	0.580755
												TNFRSF11B	0.00574379	1.56239	RAC3	3.07752e-05	0.62798
												TP53INP2	1.34331e-05	1.72424	RALGDS	9.63133e-08	0.640119
												TRAF1	0.00522463	1.99028	RAMP1	0.00716062	0.421716
												TRIB1	6.53896e-08	1.67345	RAMP3	0.00144057	0.603574
												TRIB3	8.22681e-10	1.96922	RASA4B	0.0182381	0.523163
												TRIM16	3.96923e-09	1.81158	RASL11A	0.00274825	0.630706
												TRIM16L	5.30837e-08	1.97885	RASSF2	0.00241083	0.560444
												TRIM29	4.24145e-07	1.75286	RBM38	2.29787e-07	0.609686
												TRIM36	1.47581e-06	1.97999	RBM41	2.3127e-05	0.638873
												TRIM5	0.000171949	1.53956	RBP7	0.00858089	0.65071
												TSC22D2	9.30554e-08	1.59919	RBPMS-AS1	0.0414003	0.597312
												TSPYL2	9.23955e-10	2.72359	RBPMS2	0.000210236	0.438534
												TTC33	0.00330501	1.50439	RCN2	1.08135e-07	0.638547
												TTLL7	0.0012194	1.7215	RDH14	4.03762e-06	0.592581
												TUBE1	9.40499e-05	1.65462	REEP1	0.00106316	0.566914
												TVP23B	4.40429e-06	1.56124	REEP2	0.0142588	0.602774
												TVP23C	0.000365656	1.75253	REG4	0.00118016	0.493063
												TXNIP	1.70116e-08	1.51765	RFXAP	0.00101585	0.617125
												TXNRD1	2.11889e-08	1.92776	RGS14	0.0415015	0.655533
												TYW1B	0.000327669	3.07207	RHBDL1	0.0149226	0.641581
												UBA6-AS1	1.61742e-05	1.68694	RHPN1-AS1	0.00983028	0.658143
												UBC	6.3655e-09	1.62198	RILP	0.00876141	0.662938
												UBE2Q2P2	0.0028734	1.78679	RILPL2	0.000529354	0.64408
												UBE2Q2P3	0.0205693	1.51271	RIMS3	0.000178464	0.579502
												UCN3	0.00301145	2.74304	RIN3	2.2567e-07	0.403243
												UFM1	7.05096e-07	1.56874	RIPPLY3	2.29473e-07	0.466495
												UHRF1BP1L	2.20325e-05	1.51111	RMI2	1.66533e-06	0.590279
												ULBP1	2.02189e-05	1.96838	RNF135	2.39805e-05	0.658009
												ULBP2	3.51465e-05	1.57204	RNF157	0.000136981	0.651461
												UNC13A	0.036233	2.26147	RNF166	5.75236e-06	0.645008
												UNKL	9.66642e-07	1.53746	RNF208	4.86845e-06	0.591828
												UPP1	0.000145346	2.00091	RP1-130H16.18	0.0493282	0.557866
												USP2	0.000523768	1.6377	RP1-223E5.4	0.00251062	0.452429
												USP43	2.41381e-06	1.56331	RP1-278E11.3	0.0242363	0.542465
												USP53	1.83212e-06	1.59578	RP1-286D6.5	0.0461459	0.472267
												UTP15	3.85978e-06	1.5057	RP1-59D14.5	0.0164562	0.606729
												UVRAG	6.53896e-08	1.5695	RP11-1007O24.4	0.0429987	0.636597
												VEGFA	3.94227e-10	2.10191	RP11-1035H13.3	0.026389	0.365552
												VIMP	6.81854e-08	1.67046	RP11-1055B8.4	0.00023208	0.480203
												WARS	7.95744e-09	1.60511	RP11-1055B8.7	3.04732e-07	0.599711
												WIPI1	4.19561e-07	1.51981	RP11-110G21.1	0.00474278	0.597305
												XAF1	0.00531174	5.55462	RP11-110I1.12	0.00811591	0.616699
												XPOT	7.36081e-08	1.51932	RP11-111M22.2	0.0295075	0.636716
												XPOTP1	0.00104939	1.74413	RP11-113C12.2	0.0336024	0.542771
												YARS	8.67234e-09	1.60206	RP11-114I8.4	0.0430994	0.426606
												YIPF5	2.11287e-07	1.51493	RP11-1186N24.5	0.0342957	0.625943
												ZBTB10	2.4355e-07	1.92696	RP11-1223D19.1	0.0482656	0.236359
												ZBTB21	7.61146e-10	2.44499	RP11-137H2.6	0.00900517	0.634892
												ZBTB43	9.63133e-08	1.94751	RP11-146F11.1	0.0228396	0.622516
												ZC3H12C	0.00130312	1.55128	RP11-154H23.3	0.0264438	0.483341
												ZC3H7A	2.1027e-07	1.5356	RP11-160O5.1	0.00919456	0.548775
												ZCCHC8	3.09622e-07	1.66736	RP11-162A12.2	0.0122676	0.344703
												ZEB1	2.20325e-05	3.82963	RP11-176H8.1	0.0118796	0.421948
												ZFC3H1	5.57459e-06	1.57842	RP11-196G18.23	0.000300249	0.656975
												ZFP36	2.77146e-10	2.2242	RP11-197N18.2	0.00295944	0.66039
												ZFP36L1	1.23838e-07	1.53408	RP11-20O24.4	0.0219064	0.571544
												ZKSCAN5	3.18501e-07	1.61803	RP11-229P13.20	0.0173912	0.329642
												ZMYM5	3.7641e-07	1.97283	RP11-22B23.1	0.0164775	0.663978
												ZNF10	0.000326745	1.59741	RP11-252P18.1	0.0359966	0.504407
												ZNF137P	0.00485951	1.53965	RP11-262H14.1	0.0107384	0.52572
												ZNF165	3.18911e-09	3.04145	RP11-262H14.5	0.00227332	0.437637
												ZNF184	5.43015e-07	1.92304	RP11-263C16.2	0.0424716	0.513885
												ZNF222	3.28648e-05	1.74816	RP11-273G15.2	0.0466614	0.471476
												ZNF227	1.06654e-05	1.59461	RP11-298I3.5	0.00522463	0.486773
												ZNF233	0.00533068	1.55279	RP11-307C12.12	0.0104987	0.51059
												ZNF235	1.72735e-05	2.03771	RP11-313P13.3	0.0258234	0.602338
												ZNF274	3.46777e-07	1.58353	RP11-316M1.12	5.38464e-06	0.517043
												ZNF331	2.32064e-07	1.63445	RP11-317J10.2	0.0321147	0.481087
												ZNF416	0.00073149	1.50011	RP11-319G6.1	0.0471725	0.63798
												ZNF442	0.00372742	1.56663	RP11-324E6.9	0.0086207	0.373793
												ZNF460	0.00040038	1.9924	RP11-329A14.1	0.00469449	0.396384
												ZNF529	0.000276582	1.56421	RP11-339B21.10	0.0249382	0.37617
												ZNF550	3.13353e-05	1.86373	RP11-347D21.3	0.0342937	0.609458
												ZNF555	9.79541e-05	2.18999	RP11-351I21.11	0.0418835	0.510433
												ZNF571	0.00132284	1.69466	RP11-378A13.2	0.027818	0.477703
												ZNF613	0.00273539	1.6542	RP11-390E23.6	0.000411621	0.625672
												ZNF614	2.73209e-07	1.62335	RP11-396C23.2	0.0109877	0.487707
												ZNF654	1.70232e-06	1.56955	RP11-416N13.1	0.0204402	0.609458
												ZNF674	3.55445e-05	2.00538	RP11-448G4.2	0.027454	0.56094
												ZNF697	0.000358408	1.52	RP11-465L10.10	0.0144271	0.581446
												ZNF699	0.000709047	2.13419	RP11-46C24.7	0.00176171	0.633929
												ZNF70	0.0255847	1.50092	RP11-46D6.1	0.0211669	0.649616
												ZNF75A	1.3975e-07	1.52109	RP11-485G7.6	0.0287346	0.462643
												ZNF773	0.000411826	1.67967	RP11-486B10.4	0.0197695	0.604009
												ZNF791	3.35374e-07	1.65001	RP11-498C9.16	0.0166812	0.122387
												ZNF841	1.02992e-08	2.37523	RP11-505K9.1	0.00011896	0.501108
												ZNF844	0.00264378	3.67517	RP11-521B24.3	0.00500813	0.401442
												ZNF93	8.75859e-06	1.58502	RP11-522B15.6	0.0398002	0.390728
												ZRANB1	2.2177e-07	1.507	RP11-524H19.2	0.000115996	0.597001
												ZRSR2	5.40092e-07	1.72603	RP11-532F12.5	0.00077147	0.633989
												ZSCAN12P1	6.97665e-05	2.97596	RP11-54O7.3	9.7094e-09	0.452845
												ZSCAN21	6.39778e-05	1.67858	RP11-574K11.31	0.00399838	0.391453
												ZSCAN31	3.51567e-05	1.73593	RP11-57A19.2	0.00573273	0.481154
															RP11-5A19.5	0.0112575	0.663418
															RP11-600F24.7	0.000365656	0.612976
															RP11-661A12.14	0.0351812	0.646068
															RP11-662G23.1	9.12259e-06	0.66246
															RP11-663N22.1	0.0402593	0.507927
															RP11-66N11.8	0.0321614	0.559649
															RP11-672L10.6	0.0295333	0.337802
															RP11-67L2.2	0.000139105	0.393532
															RP11-680H20.1	0.00983177	0.623901
															RP11-686O6.2	0.00543449	0.574376
															RP11-689K5.3	0.043424	0.408117
															RP11-696N14.1	0.0445556	0.594891
															RP11-6N17.4	0.00216646	0.658813
															RP11-726G1.1	0.00183674	0.381581
															RP11-77P16.4	0.0360128	0.514849
															RP11-799B12.4	0.0369652	0.393614
															RP11-79P5.9	0.00947728	0.470178
															RP11-800A3.7	0.0277798	0.439368
															RP11-80H5.5	0.0159283	0.422715
															RP11-815J4.6	0.011244	0.426355
															RP11-848P1.9	0.0096279	0.514204
															RP11-88H9.2	0.00886561	0.663811
															RP11-91J19.4	0.0167315	0.643924
															RP11-930P14.2	0.0393657	0.603122
															RP11-932O9.9	0.00776725	0.260852
															RP13-93L13.2	0.0442236	0.650305
															RP3-467N11.1	0.0222927	0.574871
															RP4-657E11.10	0.0214003	0.48223
															RP4-816N1.7	0.0021282	0.20115
															RP5-1024G6.5	0.0108726	0.430212
															RP9P	0.000473227	0.649732
															RPL35P1	0.000111907	0.474676
															RPL4P5	0.0419635	0.498118
															RTN4R	0.000531603	0.645593
															RTN4RL2	0.0219897	0.503529
															RYR1	8.76548e-05	0.413923
															S100A4	0.0287011	0.554676
															SAMD11	4.97359e-08	0.425114
															SBK1	8.72608e-07	0.518321
															SCAND1	2.1069e-05	0.65706
															SCARA3	1.55297e-06	0.611398
															SCD5	4.39728e-06	0.645345
															SCN1B	9.96418e-07	0.628145
															SCOC	1.36882e-06	0.640173
															SCUBE3	0.00228067	0.555718
															SDHCP4	0.0209892	0.553457
															SEC24B-AS1	0.0429987	0.435212
															SEMA4D	1.57854e-05	0.639757
															SEMA4F	2.77219e-05	0.520684
															SEMA4G	0.0107461	0.656087
															SEMA6A	8.52796e-05	0.521163
															SEMA6B	9.24003e-06	0.588893
															SEMA6C	0.0102355	0.660797
															SEPN1	6.3655e-09	0.554571
															SEPT1	0.00469169	0.52737
															SEPT3	0.000381534	0.622091
															SEPT8	2.43889e-08	0.641169
															SERF1B	0.000103436	0.636825
															SFT2D3	0.00105891	0.0348891
															SHISA4	0.00407057	0.634958
															SHISA8	0.0339007	0.36292
															SIGMAR1	2.46665e-06	0.618503
															SIMC1	2.03614e-05	0.638274
															SIRPA	0.00718657	0.661842
															SIRT3	0.00108152	0.642859
															SIVA1	5.60259e-06	0.61063
															SIX1	8.8058e-05	0.496648
															SIX2	0.000262988	0.550481
															SKIDA1	0.0135479	0.606037
															SKP2	2.57023e-08	0.457442
															SLAIN1	0.000625331	0.559298
															SLC16A10	0.00077147	0.432522
															SLC16A14	2.06713e-06	0.614172
															SLC16A2	3.51567e-05	0.628017
															SLC27A5	0.00175249	0.59
															SLC29A3	1.81273e-05	0.657057
															SLC2A12	0.00237563	0.441657
															SLC2A4RG	2.02452e-06	0.602218
															SLC2A8	5.8591e-06	0.63175
															SLC35E4	0.000561066	0.556341
															SLC47A1	0.000338642	0.449232
															SMAD6	1.65574e-06	0.581108
															SMARCD3	0.000150988	0.665265
															SMIM22	0.000794423	0.630603
															SMKR1	0.0088508	0.642256
															SNRPFP1	0.00506877	0.501574
															SNTA1	0.00938757	0.656733
															SNX21	7.21941e-06	0.628929
															SORBS3	4.55846e-06	0.59606
															SOWAHA	0.0497029	0.608207
															SOX18	0.000355818	0.443809
															SOX8	0.00607401	0.502328
															SP6	9.25042e-06	0.515779
															SPATA24	0.0152713	0.644899
															SPEF2	0.0015053	0.477201
															SPEG	1.6892e-05	0.594821
															SPINK7	0.00407672	0.40409
															SPR	2.28382e-06	0.624713
															SPRN	0.001462	0.554781
															SPSB4	0.000616306	0.422936
															SPTLC3	0.011735	0.478204
															SRI	1.47199e-06	0.61012
															SRP9P1	0.00926568	0.660415
															SSBP4	2.32343e-05	0.641857
															SSPO	0.00394021	0.599729
															SSTR5	0.00249892	0.489615
															SSTR5-AS1	0.000390368	0.404757
															ST3GAL2	0.000975527	0.593414
															ST6GALNAC6	6.31444e-07	0.605408
															STAT5B	7.89885e-06	0.630845
															STIM1	2.50238e-05	0.649743
															STMN3	4.25888e-07	0.563736
															STOML1	0.00173711	0.627542
															STON1	0.0100719	0.605351
															STRADB	2.9091e-06	0.480628
															STX10	2.38111e-05	0.6148
															SUMF1	9.36719e-07	0.591996
															SUSD3	0.034656	0.535782
															SWSAP1	0.00127338	0.663134
															SYDE1	0.000714098	0.479336
															SYNGR1	6.48911e-05	0.576211
															TAPT1-AS1	0.00364624	0.598176
															TBC1D19	0.0391314	0.587331
															TBCAP2	0.0419701	0.622956
															TCEA2	7.25436e-08	0.564469
															TCF7L1	2.47525e-05	0.663785
															TCIRG1	0.000111128	0.665728
															TCTN1	3.56599e-07	0.498178
															TCTN2	4.92161e-05	0.578018
															TEAD2	3.38782e-06	0.658569
															TESK1	2.66027e-06	0.626899
															TEX264	0.00010171	0.616858
															TFDP2	1.63027e-07	0.590918
															THAP4	3.7641e-07	0.646743
															THAP7	1.60534e-06	0.586763
															THAP7-AS1	0.000273494	0.543602
															THEM6	9.66642e-07	0.605704
															THNSL2	2.05676e-05	0.612991
															TIGD5	2.94489e-06	0.503189
															TIMM17B	1.33055e-08	0.416966
															TIPARP-AS1	0.0448575	0.615094
															TK2	0.0124554	0.653975
															TMEM107	0.000524794	0.629865
															TMEM109	6.81693e-07	0.658317
															TMEM115	1.7721e-08	0.5249
															TMEM121	7.86113e-07	0.331063
															TMEM129	8.39191e-06	0.58675
															TMEM134	7.42741e-05	0.611359
															TMEM160	0.000239838	0.611683
															TMEM177	0.000173421	0.589429
															TMEM189	1.64617e-08	0.587634
															TMEM189-UBE2V1	0.00413314	0.642364
															TMEM191A	0.00204709	0.648602
															TMEM191C	0.0427486	0.620926
															TMEM229B	3.78103e-05	0.611028
															TMEM238	8.12564e-05	0.525676
															TMEM25	0.000306819	0.603239
															TMEM261	2.31439e-05	0.662079
															TMEM52	0.0039775	0.631266
															TMEM54	6.21899e-05	0.618536
															TMEM56	7.11457e-05	0.541644
															TMEM8B	0.00551921	0.535496
															TMPRSS6	0.00128327	0.418355
															TMSB15B	0.0171735	0.650112
															TNFRSF18	0.000647294	0.515423
															TOLLIP-AS1	0.00255078	0.464761
															TP53I13	3.21209e-06	0.573882
															TP53TG1	1.98588e-05	0.59267
															TP63	8.18046e-05	0.632279
															TPGS1	0.000743836	0.558532
															TRAF3IP1	1.46665e-05	0.579117
															TRAM2-AS1	0.000215885	0.613631
															TRAPPC5	0.000136081	0.615784
															TRAPPC6A	4.46336e-05	0.61222
															TRIM7	0.000823016	0.587943
															TRNP1	0.00102889	0.566758
															TSEN34	4.77136e-06	0.644972
															TSHZ1	0.000210789	0.644139
															TSNARE1	0.00017792	0.617822
															TSPAN17	2.58251e-08	0.567593
															TSPAN33	5.75633e-06	0.50613
															TSPO	2.64833e-05	0.470424
															TTC12	0.000970618	0.536533
															TTC30A	0.00010517	0.550455
															TTC30B	9.95271e-05	0.607992
															TTC8	2.96718e-08	0.514798
															TTYH3	1.37869e-06	0.661554
															TUB	0.0342352	0.59523
															TUSC1	6.34751e-07	0.46907
															TWSG1	3.20604e-08	0.546563
															TXNDC17	0.000390809	0.659354
															TXNRD3	7.27306e-06	0.506771
															UFSP1	0.00317726	0.608201
															UGT1A10	0.0383115	0.215067
															UGT2B17	0.0358916	0.373114
															ULK2	1.3975e-07	0.534914
															UNC119	2.92226e-08	0.476601
															UQCR11	4.30949e-05	0.659679
															USP46-AS1	0.0129297	0.60757
															USP51	0.00622095	0.619993
															VAMP5	0.0238681	0.628649
															VARS2	7.51597e-06	0.647763
															VASH1	7.50933e-05	0.594757
															VAX2	0.00108336	0.583521
															VDAC1P6	0.0129008	0.601136
															VMAC	0.000729511	0.524555
															VMO1	0.0412256	0.516313
															VN1R81P	0.0139718	0.428856
															VPS37D	0.000317145	0.45516
															VWA1	2.41742e-05	0.531781
															WBP1	0.000699046	0.646353
															WDR34	5.09285e-07	0.593038
															WDR83	4.91071e-05	0.623895
															WHAMMP3	0.0242916	0.549889
															WNT3	0.000106744	0.416431
															WNT5B	7.71356e-05	0.305767
															WTIP	3.83982e-05	0.497121
															WWTR1-AS1	0.04481	0.501711
															XKR8	0.00077688	0.628673
															XXbac-B562F10.11	0.0101396	0.585849
															XXyac-YX65C7_A.2	0.0268671	0.370613
															YPEL1	0.00504926	0.562781
															YPEL3	1.32155e-05	0.609867
															YTHDF3-AS1	0.00329733	0.42405
															Z83851.1	0.00376237	0.28286
															ZC3HAV1L	0.0444528	0.644223
															ZDHHC12	5.32883e-05	0.650658
															ZDHHC24	9.49374e-07	0.468066
															ZDHHC8P1	0.00425445	0.442766
															ZFP30	1.52563e-06	0.513804
															ZFP69	0.000480408	0.578037
															ZFX	2.77146e-10	0.281636
															ZMYM6NB	0.00859469	0.543511
															ZMYND19	1.12051e-06	0.627769
															ZNF219	6.09305e-06	0.661981
															ZNF275	2.29725e-07	0.554738
															ZNF319	9.73416e-05	0.56595
															ZNF32	2.54102e-06	0.529563
															ZNF354C	2.64833e-05	0.618847
															ZNF358	9.47317e-06	0.48186
															ZNF385B	0.0435291	0.575531
															ZNF423	0.0363866	0.475062
															ZNF488	0.000565348	0.597414
															ZNF511	1.82887e-07	0.526757
															ZNF514	5.79708e-05	0.614233
															ZNF618	7.22589e-07	0.534655
															ZNF658	0.0192683	0.490729
															ZNF688	8.39191e-06	0.572549
															ZNF704	1.34646e-06	0.515094
															ZNF711	0.00184065	0.644162
															ZNF853	0.00147143	0.494193
															ZSCAN16-AS1	0.0174027	0.421256
															ZYG11B	4.31616e-05	0.65783

## Sheet: Table S4D
Supplemental Table S4D. List of differentially expressed genes upon siZFX with promoters bound by ZFX in C42B
Gene Name	FDR (siZFX vs siCtrl)	Expression change (ratio)
ABTB1	0.00416982	1.54487
AC027763.2	4.60577e-06	1.70625
AC040977.1	0.048397	1.95333
AC087269.1	0.000317091	6.74568
AC093673.5	0.0149909	1.6763
AC100830.3	0.0218472	2.34545
ADPRM	1.07278e-07	1.85913
AGBL3	4.16156e-05	1.68865
AL034548.1	4.03615e-05	5.20896
AL139099.1	0.0288332	1.60607
ARHGAP19-SLIT1	0.0267362	1.89167
ATXN1	2.43435e-09	2.45385
BAMBI	6.36272e-11	1.67131
BFSP1	0.0167194	2.72254
C1S	0.000759934	1.7384
C1orf53	0.0389453	1.54523
C1orf54	0.0141954	1.92141
C20orf196	0.00250432	1.98436
C7orf43	4.39191e-08	1.58191
CBR3-AS1	1.29281e-06	1.59802
CFL1P1	0.00683124	3.18591
CHAC1	1.09694e-06	1.88729
CLYBL	8.22277e-05	1.59105
CPEB3	1.25707e-09	2.18416
CTC-246B18.10	0.0283659	2.28996
CTD-2410N18.4	0.0488988	1.77305
CTD-2541M15.1	3.87255e-05	2.66746
CTSO	8.92195e-06	1.9079
DCAF13	5.56962e-10	1.50402
DDIT3	2.75696e-09	1.87012
DNAJB9	9.33964e-10	1.56994
DOCK4	1.70893e-07	1.97042
DUSP1	1.61042e-08	1.78856
ELF3	9.85777e-09	2.00667
ENO4	0.0245905	1.51687
FAM21A	2.55268e-10	1.6131
FAM21FP	0.0145473	2.03357
FAM227B	0.00195799	1.53738
FMO5	0.0219051	1.51431
FTH1	6.23534e-13	2.39925
GADD45A	3.45844e-06	1.64252
GAN	3.57774e-07	1.52278
HIST1H1E	0.00269154	1.64616
HIST1H2BD	5.29934e-07	1.53987
HLA-DMA	0.0017775	1.65033
HMGCS1	6.36272e-11	1.64087
IRF7	1.73359e-07	1.71818
JARID2	6.1577e-08	1.50428
JUN	9.83091e-11	1.85898
KDM5B	2.91002e-09	1.6061
KDM8	0.00615176	1.50766
KLHL24	4.02099e-10	2.10496
LATS2	3.85975e-09	1.61494
LIG4	1.58779e-07	1.52703
LPXN	8.46212e-05	1.50967
MAPT	4.22267e-06	1.50691
MBL1P	0.00394124	1.8959
ME1	4.5692e-10	1.54334
MIR4523	0.027133	2.36468
MKLN1-AS2	1.33729e-05	1.58363
MSMO1	6.67428e-08	1.50685
NPC1	2.47879e-10	1.60854
OXSM	7.07944e-08	1.51328
PARD3	0.00111617	1.50393
PEX7	0.000181958	1.52094
PFKFB2	8.31652e-10	1.58357
PLEKHB2	1.10271e-10	1.53799
PLK2	4.84256e-08	1.78678
PPAN-P2RY11	0.044525	1.95606
PPP2R5B	1.59891e-07	1.77953
PUS10	1.21558e-05	1.56129
RAB30	1.10713e-07	1.5701
RAD21-AS1	0.000122171	2.30157
RGMB-AS1	0.000615313	1.62293
RIPK4	2.41764e-07	1.57741
RMDN2	0.0232311	1.6955
RN7SK	0.000123361	2.12574
RP1-28H20.3	0.0138674	3.34313
RP11-10C24.1	0.040187	1.53701
RP11-134L10.1	0.00178591	1.63813
RP11-159D12.5	0.00127494	2.57936
RP11-20B24.4	0.0237465	1.92054
RP11-234A1.1	5.10792e-05	1.64187
RP11-259G18.1	0.0301542	1.59863
RP11-264B17.3	0.00015674	1.7327
RP11-268J15.5	6.72712e-06	1.89948
RP11-304L19.5	3.56615e-05	1.51838
RP11-305E17.6	0.0479702	1.5182
RP11-314A20.1	0.00195165	1.94088
RP11-326F20.5	0.00615185	1.76303
RP11-435O5.2	5.92341e-05	1.51468
RP11-512M8.5	0.00144532	1.73621
RP11-554J4.1	0.00372539	2.08026
RP11-563N4.1	1.73281e-05	2.04331
RP11-629O1.2	0.00334315	1.50664
RP11-770J1.5	0.000427562	3.84279
RP11-783K16.5	0.0031452	1.51656
RP11-863K10.7	0.0380052	2.8328
RP11-87C12.2	0.0116736	2.44531
RP11-91G21.1	0.000409817	1.56458
RP11-93B14.6	0.0448863	1.82436
RP13-131K19.6	0.0381648	2.08499
RP13-516M14.1	0.000917893	1.50195
RPL17-C18orf32	0.0178554	1.91114
RPP40	3.02908e-09	1.63809
RPS29	8.65257e-06	1.57447
RSPH1	0.000120154	2.02782
SCARF1	0.00488055	1.66726
SCARNA2	0.0415125	2.03988
SENP3-EIF4A1	0.00314218	1.64666
SERPINB8	0.00116144	2.3652
SGPL1	3.80777e-09	1.5695
SLC25A16	2.04399e-10	1.75321
SLC30A1	3.04002e-11	1.76244
SLC6A9	2.98512e-05	1.54796
SNHG9	2.06352e-07	1.56199
SOCS2-AS1	0.00292794	2.07437
SP100	8.23152e-07	1.61091
SP140L	0.00200591	1.66973
SPATA1	0.0141328	1.77016
SQSTM1	1.07073e-10	1.89066
ST3GAL1	6.36272e-11	1.57137
TAF13	4.36045e-10	1.56913
TBKBP1	6.65015e-08	1.52484
TERC	0.0019686	2.89036
TMEM88	0.000155453	2.05245
TNFAIP3	1.58458e-05	1.86558
TNFRSF10D	3.31455e-10	1.66793
TP53INP1	5.55196e-12	2.48584
TRIB1	1.85867e-07	1.51116
TSC22D1	4.00475e-10	1.58307
TYW1B	0.00136501	1.6748
UNC79	0.0211325	2.37846
WDR37	1.51503e-08	1.55684
YBEY	1.69193e-05	1.62026
ZACN	0.000170895	2.42168
ZNF10	6.35442e-07	1.6645
ZNF277	4.67448e-07	1.54243
ZNF350	1.40255e-06	1.60491
ZNF416	0.000111822	1.50627
ZNF419	2.15294e-06	1.58202
ZNF570	0.000826611	1.51401
ZNF641	4.34366e-08	1.63568
ABCB10	1.90481e-09	0.426865
ABHD15	2.39853e-05	0.626104
AC004540.5	0.000808561	0.332695
AC005003.1	0.000399788	0.651122
AC007383.3	0.0274254	0.44416
AC018755.1	0.00020125	0.447734
AC034220.3	3.20238e-05	0.437846
AC090616.2	0.0150002	0.598909
AC091729.9	0.000202149	0.608554
AC092667.2	0.00051113	0.520881
AC093415.2	0.00379604	0.484467
AC093677.1	0.0367328	0.396237
AC117395.1	0.040532	0.507583
AC133785.1	0.000549989	0.502534
ACADSB	1.09286e-10	0.557275
ACD	3.40359e-07	0.567987
ACOT7	9.43226e-07	0.622827
ACOX2	0.000224979	0.276813
ACTRT3	0.000489253	0.550466
ACVR2B-AS1	0.0111259	0.56212
ADCK2	3.42027e-11	0.435416
ADCY3	7.30523e-09	0.528547
ADCY7	1.96885e-07	0.600781
AK3	1.82886e-10	0.527364
AKAP7	5.86987e-05	0.508272
AKIP1	2.356e-07	0.646005
AKT1	2.26077e-11	0.609952
ALDH5A1	1.91248e-08	0.465367
ALX4	0.00114154	0.646794
AMER1	1.77739e-09	0.561466
AMFR	1.99505e-09	0.583589
AMZ2	2.05215e-09	0.641652
ANKRD13B	7.84931e-11	0.40268
ANKRD16	5.15156e-06	0.596083
ANKRD52	4.68512e-13	0.293514
ANKRD65	1.02982e-06	0.228712
ANKS6	7.1218e-08	0.617553
ANO6	2.69957e-09	0.630404
AP3M2	4.4682e-09	0.577506
AP5B1	9.83851e-08	0.603112
APBA2	1.77848e-07	0.614061
APOLD1	1.53608e-06	0.561827
APPL1	2.82842e-10	0.628589
ARAP3	2.32488e-08	0.215794
ARC	1.32195e-06	0.649726
ARHGAP21	1.00622e-09	0.473934
ARHGAP33	3.41731e-06	0.595889
ARHGEF4	9.57549e-09	0.506925
ARL2BP	6.45425e-11	0.43198
ARNT2	1.01048e-07	0.137687
ARNTL2	8.86271e-09	0.523299
ASAP2	4.85907e-08	0.565507
ATAD5	7.35248e-08	0.649892
ATP11B	1.67977e-10	0.631315
ATP6V1E2	1.70893e-07	0.548301
ATP6V1G2-DDX39B	2.39344e-07	0.494936
AUNIP	1.67456e-05	0.598388
AURKB	5.49836e-09	0.580553
AXIN1	1.80706e-09	0.554813
B3GALTL	1.05307e-06	0.612164
B4GALT5	1.74861e-10	0.543268
B4GALT6	5.21e-08	0.379125
BACE1	3.06276e-08	0.638903
BAD	3.37896e-07	0.627019
BAG3	5.14494e-10	0.661922
BCAS4	0.000157042	0.362678
BEND7	4.92812e-05	0.485241
BIVM	9.90171e-08	0.636456
BLM	1.74282e-08	0.483699
BLVRA	7.46798e-10	0.4022
BRCA1	2.04399e-10	0.56043
BRCA2	1.13691e-08	0.607536
BRD7	6.87554e-10	0.616451
BRI3BP	8.54252e-10	0.574189
BRIP1	6.0504e-08	0.593857
BTC	0.0136104	0.300394
BUB1	5.26003e-10	0.613797
BZRAP1-AS1	0.00120326	0.402758
C11orf24	3.22291e-08	0.62656
C11orf35	0.00155535	0.632726
C11orf84	5.263e-08	0.606698
C11orf85	0.000853379	0.508862
C15orf52	2.15977e-07	0.652877
C16orf59	1.6157e-07	0.626649
C17orf53	0.000410091	0.627477
C17orf96	1.00622e-09	0.584205
C19orf57	0.000663756	0.660497
C21orf58	2.13238e-09	0.517702
C2CD2	1.82886e-10	0.45765
C5orf38	0.000439887	0.546372
C5orf42	1.90424e-07	0.389986
C5orf54	1.15031e-08	0.465981
C5orf56	0.00118268	0.498043
C9orf139	0.0400663	0.490255
CABLES2	5.85916e-09	0.385383
CAPN15	1.84393e-11	0.540662
CARS2	8.53194e-09	0.553287
CASC2	0.0014583	0.534861
CASC4	9.14513e-10	0.647225
CASC5	6.82104e-09	0.568942
CBFB	1.10956e-09	0.648572
CBLN3	1.33515e-05	0.26247
CCDC136	1.15747e-08	0.538219
CCDC177	0.0160782	0.340079
CCDC34	1.20009e-08	0.624213
CCDC92	9.54856e-06	0.511814
CCDC96	0.000268212	0.573271
CCNA2	6.96548e-10	0.651405
CCP110	3.12463e-09	0.640913
CCSAP	2.27413e-10	0.533997
CCSER2	1.07313e-08	0.528333
CD276	1.57842e-11	0.497602
CD59	2.45365e-10	0.527297
CDC20	7.76637e-10	0.63444
CDC27	2.176e-10	0.502732
CDCA3	1.14521e-09	0.615969
CDCA4	3.61126e-09	0.595728
CDCA7	2.29145e-08	0.640949
CDKN2B-AS1	0.003068	0.356417
CDKN2D	7.31735e-07	0.584904
CDPF1	2.01779e-05	0.60943
CEBPA	5.50389e-08	0.51937
CEBPA-AS1	2.86983e-06	0.577568
CECR5-AS1	0.0290108	0.382884
CELSR2	4.31112e-12	0.362236
CENPA	7.00796e-08	0.622421
CENPE	1.04449e-09	0.53019
CENPF	3.01312e-10	0.589726
CENPJ	1.80227e-09	0.580148
CENPP	5.02972e-07	0.664883
CEP112	1.0214e-07	0.151147
CEP135	3.4176e-06	0.634915
CEP19	1.80509e-05	0.523537
CEP250	2.22943e-08	0.654295
CEP78	5.19647e-11	0.511583
CHAF1B	2.71495e-09	0.512594
CHKB-AS1	0.000727327	0.530569
CHST14	1.73454e-09	0.501584
CHST3	2.94928e-09	0.246453
CHTF18	1.84317e-10	0.595209
CIDEB	8.57695e-06	0.444905
CITED4	3.2575e-06	0.467275
CKAP2	6.91032e-10	0.647367
CKAP2L	1.34038e-08	0.648021
CKAP5	1.81614e-10	0.663722
CMPK2	3.8145e-06	0.444641
CMTM4	3.04002e-11	0.522451
CNOT6L	1.76188e-09	0.488756
COCH	7.93697e-05	0.654807
CORO1A	0.00329825	0.564598
CORO2A	1.04449e-09	0.561367
CPD	1.08205e-09	0.648146
CRLF3	2.61858e-07	0.666459
CROCCP3	0.00799758	0.637807
CRTAP	2.04399e-10	0.584574
CRTC3	2.09946e-09	0.370426
CRYL1	1.106e-05	0.646259
CSF1	0.000407803	0.492131
CTC-241N9.1	0.0213204	0.543878
CTD-2213F21.2	0.0470716	0.564187
CTD-2319I12.4	0.0061351	0.552445
CTD-2377O17.1	0.0301349	0.392708
CTD-2537I9.12	0.0184495	0.644819
CTD-2574D22.2	5.86691e-05	0.43504
CTDSPL2	3.04002e-11	0.498966
CTNNAL1	3.73918e-09	0.603476
CTNNBIP1	1.25194e-07	0.631284
CTSL	1.28756e-10	0.550705
CTSZ	4.44092e-13	0.202855
CUL1	1.26633e-09	0.59262
CXCL16	6.26455e-09	0.60408
CYFIP2	8.79446e-09	0.247392
DDX12P	1.7479e-07	0.581704
DDX60	0.00126397	0.580149
DENND1B	9.85314e-09	0.574623
DEPDC1	1.25881e-11	0.541526
DGCR5	0.000431246	0.295377
DGKE	1.67375e-11	0.420971
DIAPH3	5.24873e-08	0.655714
DICER1-AS1	0.00253603	0.64091
DIRC2	6.5636e-10	0.35995
DIS3L	4.31112e-12	0.350076
DLAT	2.8004e-12	0.440356
DMTN	8.6937e-09	0.559383
DOCK7	1.14521e-09	0.603017
DONSON	2.99626e-06	0.662189
DUSP7	3.58954e-07	0.645358
DVL3	7.7529e-10	0.65047
E2F1	3.73918e-09	0.626339
E2F7	9.42765e-10	0.587061
ECHDC3	9.25095e-10	0.419355
EEA1	5.58648e-10	0.502268
EID2B	0.000335753	0.64985
EIF2AK2	7.90543e-12	0.381147
EIF2AK4	7.96496e-12	0.510305
ELMOD3	7.30615e-07	0.62863
ELOVL6	1.60974e-06	0.66592
EME1	4.54518e-08	0.584983
EN2	5.9126e-06	0.522909
EPHB3	2.8177e-07	0.589846
ERO1LB	8.02385e-06	0.651079
ESPL1	2.75692e-10	0.545255
EVC	9.98451e-10	0.382902
EXD3	0.00108484	0.649366
EXOC5	1.30977e-10	0.643475
EXT2	2.87813e-09	0.521378
EXTL3-AS1	0.00441091	0.490261
F2R	4.39022e-06	0.609097
FADS1	7.14297e-10	0.644922
FAM115A	6.87554e-10	0.655694
FAM120C	2.72997e-08	0.629256
FAM169A	2.34796e-09	0.376173
FAM189B	3.31455e-10	0.594305
FAM219A	3.66814e-08	0.544579
FAM32A	1.66067e-08	0.663199
FAM45A	1.77308e-08	0.635413
FAM53A	0.00421313	0.649314
FAM58A	1.60694e-08	0.495751
FAM66B	0.000223638	0.306988
FAM66D	0.0391502	0.386094
FAM69B	8.63917e-07	0.567759
FAM83D	7.87887e-11	0.614626
FAM83F	9.42765e-10	0.645615
FAM89A	5.5296e-05	0.421037
FANCA	7.03384e-09	0.628113
FANCD2	5.48609e-09	0.640721
FANCG	9.49771e-09	0.660101
FAXC	9.30171e-07	0.313751
FBLN1	0.00026958	0.653111
FBXO44	3.53458e-08	0.532666
FBXO5	9.52139e-09	0.632129
FBXO6	4.32242e-07	0.266175
FBXW4	6.36272e-11	0.366778
FCHSD2	2.02821e-05	0.655193
FEV	3.51801e-06	0.46787
FKBP9	2.29527e-10	0.456769
FOXD2	0.00127924	0.54558
FOXJ2	5.08037e-09	0.537331
FOXM1	4.88178e-11	0.616413
FSCN2	0.000324372	0.528704
FUT5	0.0285141	0.256895
FZD6	6.09928e-11	0.481277
FZD8	0.00167604	0.666035
GAREML	8.94242e-08	0.290822
GAS2L1	6.85635e-10	0.600037
GAS6	1.48128e-05	0.593976
GBAS	9.07365e-11	0.547679
GINS2	2.1376e-08	0.629359
GLTPD2	0.00370211	0.375827
GNAZ	8.21838e-10	0.405573
GNB1L	6.00804e-06	0.548397
GPD2	1.02303e-08	0.660998
GPR125	1.48824e-07	0.618452
GPR156	9.96579e-05	0.644594
GPR157	1.70893e-07	0.660895
GPR161	6.83041e-08	0.336992
GPR180	1.80706e-09	0.626134
GPR27	0.0206371	0.572821
GPR98	5.25428e-05	0.620547
GRAMD1A	6.1577e-08	0.656975
GREB1L	1.02982e-06	0.561835
GRK6	1.39952e-09	0.603914
GS1-179L18.1	0.000226697	0.520238
GS1-393G12.14	0.0368917	0.550258
GSC	1.79741e-06	0.496433
GTSE1	1.07621e-10	0.50238
H2AFX	6.36272e-11	0.526099
H6PD	5.76333e-10	0.614574
HACE1	9.75501e-07	0.521857
HAGH	1.22744e-09	0.575559
HDAC11	1.81249e-07	0.513367
HDAC4	5.24727e-05	0.645866
HDGFRP3	1.24325e-07	0.492959
HEY1	0.00112134	0.603814
HGSNAT	7.76637e-10	0.524966
HIRIP3	9.07365e-11	0.520668
HMX1	9.38514e-05	0.605108
HNF4G	2.20364e-06	0.341919
HOXA-AS3	0.000826055	0.478184
HOXA3	0.000537596	0.379683
HOXA4	0.000614476	0.554626
HOXA6	0.00324238	0.55445
HOXC4	0.000867162	0.433859
HSF2	3.33513e-06	0.658782
HSPA12A	4.02974e-06	0.490954
HSPG2	1.23637e-08	0.47916
IAH1	5.06016e-07	0.651789
ICA1L	0.00144275	0.434667
ICMT	4.14364e-10	0.660416
IDNK	5.71838e-05	0.479124
IFFO2	9.04215e-07	0.578414
IFIT5	5.6423e-06	0.303782
IL17D	3.48055e-07	0.51141
IL20RA	0.000393872	0.504059
IMPAD1	2.29527e-10	0.640296
INPP5E	2.22943e-08	0.505458
INPP5F	2.78005e-09	0.416397
INSR	1.65634e-07	0.656592
INVS	2.198e-07	0.405315
IPP	5.20792e-07	0.647901
IRF2	5.74679e-06	0.605863
IRF5	9.33114e-07	0.537921
IRX2	7.81241e-08	0.324482
ITPKA	0.0400869	0.477616
ITPRIPL2	1.02043e-06	0.585982
JOSD1	1.74804e-10	0.570627
KAT6A	5.74488e-08	0.643843
KATNBL1	2.77971e-09	0.470327
KAZALD1	1.82529e-07	0.647511
KB-1460A1.1	0.0280792	0.31296
KB-1507C5.2	0.0103952	0.350363
KB-1732A1.1	0.00685615	0.651473
KCNAB2	9.75542e-10	0.355299
KCNG1	0.0199888	0.492573
KCNQ1	9.93613e-06	0.412953
KCNQ2	5.3389e-07	0.63379
KCNQ4	1.82893e-06	0.617721
KDELC1	4.9801e-07	0.620986
KDM3B	4.38374e-11	0.554596
KIAA0753	8.78693e-07	0.644242
KIAA0825	0.0193034	0.527414
KIAA0895	6.1577e-08	0.39074
KIAA1549	3.79692e-10	0.551444
KIAA1551	1.36645e-08	0.562328
KIF11	7.58893e-08	0.632598
KIF14	3.66927e-10	0.564592
KIF18B	3.25801e-09	0.624194
KIF20A	2.98279e-11	0.570477
KIF23	6.82355e-10	0.597134
KIF24	2.72587e-09	0.497541
KIFC1	6.04699e-10	0.596973
KLHDC9	2.97823e-07	0.416557
KLHL22	2.41791e-10	0.374575
KLHL42	1.78943e-10	0.567998
KLHL5	4.9173e-06	0.594989
KRCC1	1.38321e-06	0.469647
LARP6	0.000280242	0.569869
LEMD2	6.43239e-11	0.481622
LEPRE1	7.56788e-08	0.570085
LIG3	1.04356e-08	0.628163
LIMS1	2.32907e-09	0.625011
LINC00086	2.34174e-07	0.503444
LINC00863	0.00317356	0.634118
LIPT2	0.00048054	0.529166
LMF2	7.20772e-08	0.656469
LMNB1	2.75692e-10	0.626264
LONRF1	2.40499e-12	0.35569
LONRF2	0.00098392	0.547669
LOXL1	0.000176971	0.423385
LOXL1-AS1	4.2208e-06	0.475447
LPCAT1	2.00431e-12	0.381431
LPGAT1	7.90543e-12	0.380501
LRP11	1.22744e-09	0.544727
LRP3	4.92627e-10	0.55425
LRP5	8.55713e-11	0.564243
LRRC41	1.9191e-11	0.401712
LRRC45	7.05423e-09	0.637139
LTBP1	0.000259233	0.563351
LYNX1	6.77871e-07	0.593332
LYRM9	9.04796e-05	0.330354
LZTS1	0.012599	0.54763
MAD2L1	2.75692e-10	0.555678
MAFG-AS1	0.000149496	0.654016
MAGEE1	1.22348e-08	0.375322
MAGEF1	1.52206e-10	0.600206
MALSU1	3.14677e-08	0.665913
MAML1	5.97004e-10	0.599044
MAN2A2	4.14364e-10	0.535094
MANEAL	8.72694e-09	0.591251
MAP4K1	0.00583254	0.56203
MAP4K4	2.04399e-10	0.596667
MAPK9	9.33964e-10	0.558445
MARVELD1	1.3041e-09	0.622948
MAVS	1.00604e-07	0.615662
MBOAT1	0.00308014	0.488826
MCM3	2.46e-10	0.58862
MCMBP	6.91032e-10	0.650992
MDGA1	2.96066e-06	0.332499
MDK	1.05844e-07	0.591521
ME2	4.20815e-09	0.617174
MED30	2.72157e-07	0.442273
MESP1	1.50555e-07	0.588011
MEX3D	3.50604e-08	0.626211
MFSD11	1.11991e-07	0.635378
MFSD2A	5.9936e-08	0.419415
MID2	4.36814e-07	0.574628
MKI67	2.12075e-11	0.535851
MLH3	3.7946e-10	0.546612
MLK4	3.00113e-09	0.501382
MLTK	5.48609e-09	0.542131
MMP11	1.48643e-06	0.436376
MND1	2.61443e-05	0.603556
MNX1	1.17683e-05	0.569595
MNX1-AS1	9.62838e-06	0.637192
MOB1A	2.61626e-11	0.464702
MOCOS	1.80414e-08	0.555865
MORC4	1.10514e-09	0.543447
MRPL45	9.10385e-09	0.661922
MSANTD3	1.44031e-08	0.492317
MSH5	2.19941e-06	0.650572
MST1P2	0.029149	0.545374
MSX1	1.90029e-05	0.563893
MTDH	4.1554e-11	0.622153
MTERFD1	4.64321e-08	0.626926
MTERFD3	1.00604e-07	0.570967
MVB12B	2.76195e-10	0.193764
MX1	0.000545634	0.548595
MXD3	5.47511e-08	0.609744
MYH10	2.12075e-11	0.532595
MYH9	2.11489e-10	0.640994
N6AMT2	0.000444434	0.66297
NAA60	7.82697e-10	0.571329
NAGA	1.01773e-09	0.578985
NCAPG	1.00931e-09	0.616917
NCAPH	3.24293e-09	0.630013
NCK2	9.71532e-08	0.502651
NDN	2.06402e-08	0.666038
NDNL2	4.55353e-09	0.564968
NEDD1	3.52606e-08	0.655385
NEIL3	1.55596e-06	0.540972
NEK4	7.06306e-08	0.649542
NEURL1B	6.1577e-08	0.625009
NFYB	5.30701e-08	0.663058
NMNAT3	0.0185997	0.584258
NNT	4.58054e-07	0.66294
NNT-AS1	5.11529e-07	0.491453
NPAS2	2.66178e-07	0.481042
NPTX2	4.36706e-07	0.555329
NPTXR	1.95807e-07	0.506951
NRF1	3.59382e-08	0.5268
NSMAF	4.98435e-10	0.58699
NT5C3B	4.98435e-10	0.606143
NT5M	4.12383e-05	0.585737
NUAK1	2.08998e-06	0.615302
NUSAP1	2.46713e-09	0.657543
OAT	5.49292e-08	0.658675
ODAM	0.00492405	0.626554
OGFR	8.7034e-09	0.658219
OGFRL1	3.52078e-11	0.466081
ORC6	9.85777e-09	0.586085
OSBPL5	2.92754e-10	0.579452
OSCP1	1.99194e-05	0.592633
OTUD1	2.62939e-05	0.499377
PAPD7	6.36272e-11	0.492936
PAQR4	1.59493e-09	0.62326
PARD3B	0.000837345	0.640161
PARN	1.84306e-08	0.621016
PARP9	2.11327e-08	0.651932
PAXIP1-AS1	7.31122e-08	0.614505
PBX3	4.86935e-06	0.62818
PCGF5	2.83091e-11	0.375053
PCNX	2.16817e-10	0.486599
PDCD7	6.48701e-09	0.547613
PDE12	4.36045e-10	0.626368
PDE6D	6.27399e-05	0.648847
PDIA4	3.1399e-11	0.636238
PDX1	0.00723322	0.65322
PELI3	6.45425e-11	0.310114
PEX10	2.78005e-09	0.637236
PHF10	7.87887e-11	0.45668
PHF2	2.58692e-09	0.594741
PHF7	5.91547e-06	0.585291
PHLPP2	6.61268e-10	0.468299
PHTF1	5.5968e-06	0.54478
PIGZ	0.0132287	0.503656
PIM1	7.1434e-08	0.440696
PKD1P6	2.51784e-06	0.610436
PKDCC	1.95003e-05	0.513215
PKN3	2.98232e-05	0.529445
PKNOX2	0.00906019	0.584421
PLEKHO1	0.000372919	0.614617
PLK3	3.49047e-06	0.577204
PLK4	2.43435e-09	0.497671
POLA2	6.68489e-09	0.579721
POLE	6.01393e-09	0.641519
POLQ	3.78948e-10	0.586533
PPP1R26-AS1	0.000211527	0.5678
PPP1R3E	8.23606e-07	0.645584
PPP1R3F	2.89808e-06	0.561005
PPP1R9A	5.35335e-06	0.537363
PPP2R3B	0.000553528	0.655885
PPP4R1	1.24981e-09	0.624798
PRAC1	9.44874e-06	0.643381
PRIMPOL	7.74639e-07	0.626948
PRKAR2B	2.15709e-08	0.619962
PRNP	8.35093e-10	0.61811
PRRG4	1.80706e-09	0.643517
PTBP3	9.67985e-10	0.620764
PTGFRN	1.09641e-09	0.663002
PTPN9	2.90569e-08	0.600388
PTS	1.04557e-09	0.579378
PXK	9.27409e-05	0.666264
PYGO1	2.94368e-09	0.545142
QSER1	1.5099e-09	0.612641
R3HDM2	9.01188e-10	0.566626
RAB11FIP2	1.22744e-09	0.505209
RAB11FIP3	6.69856e-10	0.528826
RAB36	1.51373e-08	0.394164
RAD51	1.50056e-06	0.663664
RAD54B	3.1253e-07	0.588293
RAI14	6.87554e-10	0.622665
RAPGEF1	3.04002e-11	0.434765
RAVER2	2.23083e-07	0.617668
RBL1	7.66943e-08	0.650138
RBPMS2	6.46022e-10	0.436043
RDH14	8.37137e-07	0.590438
RECQL4	1.00622e-09	0.634446
RELT	2.02755e-06	0.575583
RFXAP	1.86153e-07	0.532466
RGPD8	0.000820123	0.567786
RGS12	1.47926e-06	0.577779
RHNO1	2.97028e-08	0.621979
RHPN1-AS1	0.00401143	0.660978
RILPL1	1.14658e-06	0.570827
RNF141	2.49764e-09	0.600625
RNF167	2.35616e-09	0.649479
RNF208	2.07888e-06	0.550032
RNF8	7.09224e-07	0.63121
RP1-140A9.1	0.0451932	0.570952
RP1-43E13.2	0.0473191	0.318457
RP11-1055B8.6	0.000864849	0.378433
RP11-1055B8.7	2.01971e-10	0.426912
RP11-108L7.15	0.01866	0.661618
RP11-110I1.12	9.90184e-05	0.628505
RP11-1275H24.1	0.00125835	0.657995
RP11-1275H24.3	0.0079688	0.552988
RP11-160O5.1	0.00018414	0.431363
RP11-163E9.2	0.00834185	0.321521
RP11-212P7.2	3.44105e-08	0.605905
RP11-244K5.8	9.35086e-06	0.464458
RP11-273G15.2	0.000386495	0.312436
RP11-299G20.2	0.000283897	0.596712
RP11-304L19.8	0.0108198	0.262807
RP11-307C12.12	0.00878614	0.637179
RP11-324I22.4	0.0267699	0.617449
RP11-333E13.4	0.0117453	0.442657
RP11-347C18.3	0.0128113	0.487345
RP11-359B12.2	0.000569341	0.518821
RP11-381K20.2	0.000140966	0.381406
RP11-396C23.2	0.012035	0.497995
RP11-458D21.5	0.000427562	0.589227
RP11-47A8.5	0.000157726	0.525832
RP11-49I11.1	0.0186345	0.653117
RP11-521B24.3	7.7658e-07	0.589355
RP11-539I5.1	0.0266447	0.645437
RP11-545A16.3	0.0186503	0.395632
RP11-549B18.1	0.00766609	0.499246
RP11-552F3.9	0.0188752	0.619489
RP11-564D11.3	0.000298697	0.650636
RP11-567M16.1	0.015783	0.279073
RP11-57A19.2	0.000125308	0.64798
RP11-617D20.1	0.00747417	0.55598
RP11-685M7.3	0.00270342	0.518323
RP11-708J19.1	0.0051638	0.637162
RP11-715J22.4	0.00231612	0.567098
RP11-744K17.2	0.000179628	0.365881
RP11-793H13.11	0.00381773	0.62179
RP11-816J6.3	0.0229704	0.431872
RP11-848P1.2	0.0423103	0.583649
RP11-876N24.4	0.0349796	0.639962
RP13-766D20.2	0.043705	0.630665
RP3-402G11.26	0.00414527	0.64396
RP4-559A3.7	0.0101269	0.634583
RP4-561L24.3	0.00481435	0.433888
RP4-694B14.5	3.18939e-06	0.633824
RP4-758J18.10	0.00648075	0.51853
RP5-1061H20.3	0.00333656	0.377631
RP5-1148A21.3	0.00164872	0.576675
RP5-1157M23.2	0.0197573	0.521272
RP5-902P8.10	0.0295266	0.45562
RPIA	1.56198e-06	0.592586
RTDR1	0.0455724	0.540249
S1PR3	1.76527e-09	0.644554
SAMD11	5.24983e-10	0.420709
SAPCD2	9.07365e-11	0.592088
SBK1	2.15709e-08	0.502448
SCCPDH	3.00113e-09	0.514622
SDCCAG8	2.85554e-05	0.656984
SEC24B-AS1	0.00322642	0.277022
SEMA3F	4.14262e-07	0.62407
SEMA4D	1.27052e-07	0.621817
SEPN1	4.47918e-11	0.474828
SEPT1	0.0320569	0.649236
SERAC1	0.00186234	0.595749
SESTD1	1.14152e-09	0.440788
SF3B1	1.54987e-12	0.4838
SFT2D2	2.09282e-09	0.637484
SGCB	2.49806e-09	0.508924
SH3GLB2	3.81908e-09	0.621843
SHCBP1	4.31112e-12	0.468341
SIGMAR1	5.99422e-12	0.485072
SIMC1	3.59382e-08	0.46616
SIRPA	1.97745e-05	0.55837
SIX2	0.00110375	0.601077
SKIDA1	0.0298517	0.48645
SKP2	2.12075e-11	0.455575
SLAIN1	2.47806e-06	0.634782
SLC16A14	4.1554e-11	0.448262
SLC22A31	2.78393e-07	0.463246
SLC35D1	0.0198205	0.507333
SLC35E4	3.28255e-05	0.653943
SLC36A4	3.01376e-06	0.660342
SLC37A1	2.53764e-09	0.515427
SLC45A3	5.92507e-13	0.437925
SLMO1	1.96048e-07	0.42808
SMAD3	0.000154769	0.614532
SMAD4	1.34038e-08	0.63362
SMAD6	1.37385e-08	0.586395
SMKR1	2.93645e-06	0.56214
SMO	6.36272e-11	0.251797
SNRPA1	3.08993e-10	0.618424
SNX24	2.85626e-06	0.47852
SNX9	1.78051e-07	0.522108
SOCS6	2.75696e-09	0.29723
SOCS7	6.24928e-06	0.639096
SOGA1	4.68512e-13	0.399348
SOX6	0.033561	0.502851
SP5	0.00168703	0.303283
SPDL1	1.57749e-08	0.625294
SPECC1L-ADORA2A	0.000302388	0.443886
SREK1IP1	3.11086e-09	0.495882
SRR	1.55006e-06	0.630697
SSH1	2.61626e-11	0.433012
ST3GAL4	9.53919e-07	0.612455
STAT5B	4.58602e-09	0.604831
STIM1	1.91248e-08	0.628907
STK24	6.80062e-10	0.582565
STK24-AS1	0.000289445	0.212332
STRIP2	7.56949e-08	0.621361
STX16-NPEPL1	0.0376626	0.615969
STX17	1.30569e-07	0.660504
TACC3	6.69585e-11	0.61394
TANGO2	1.23621e-08	0.537942
TBXA2R	0.00426137	0.328134
TCOF1	5.91465e-10	0.661373
TCP11L1	7.09224e-07	0.520547
TCTEX1D2	1.3452e-05	0.583751
TCTN1	4.07429e-08	0.471344
TCTN2	1.07497e-06	0.579421
TEAD1	1.27246e-09	0.601127
TEAD3	1.14071e-06	0.665223
TENC1	1.73767e-10	0.531556
TESK1	2.9815e-11	0.309325
THAP3	2.93393e-06	0.659699
THAP7	4.26622e-09	0.568262
THAP7-AS1	0.000695466	0.653473
THRB-AS1	0.0355696	0.547501
TICRR	2.04399e-10	0.473015
TIGD5	1.59728e-08	0.432578
TM4SF19-AS1	0.00189757	0.340908
TMEM117	3.05471e-05	0.407715
TMEM121	2.86993e-05	0.348536
TMEM170B	4.5995e-06	0.453131
TMEM179	1.25537e-08	0.174334
TMEM189	5.38726e-10	0.352316
TMEM194B	1.28863e-05	0.651625
TMEM214	5.72128e-10	0.591199
TMEM229B	9.93852e-05	0.38697
TMEM254-AS1	4.34608e-05	0.662184
TMEM56	3.51186e-06	0.659078
TMEM8B	1.73281e-05	0.663404
TMEM98	5.20929e-08	0.619914
TMOD2	7.65811e-07	0.342487
TMPO	3.11014e-12	0.54384
TMPO-AS1	5.94805e-05	0.578704
TMSB15B	0.0202736	0.549845
TNFRSF11A	0.00179397	0.611875
TNFRSF18	3.39212e-06	0.314207
TOP2B	2.58965e-10	0.637537
TOR3A	2.17251e-08	0.662812
TPX2	1.83063e-09	0.656458
TRAF3IP1	7.05423e-09	0.571722
TRAM2-AS1	1.89703e-05	0.587405
TRIM47	5.2424e-07	0.576212
TRIP13	4.08225e-09	0.660776
TRNP1	6.22894e-05	0.547182
TSHZ1	2.00354e-07	0.5874
TTC12	2.11593e-07	0.552972
TTC16	0.0128017	0.497107
TTC8	3.02908e-09	0.539193
TUBG1	8.36396e-11	0.577262
TUSC1	1.16943e-07	0.413149
TWSG1	2.90053e-12	0.26082
TXNDC12	4.36774e-09	0.568925
TXNRD3	2.77884e-09	0.393483
TYSND1	9.33092e-10	0.556602
UBAC1	1.5099e-09	0.634603
UBE2S	2.12075e-11	0.56678
UBXN2A	4.53259e-08	0.574139
ULK2	2.58965e-10	0.430258
UNC119	1.03298e-08	0.568143
UNG	3.76121e-09	0.611497
USP28	1.18171e-08	0.665641
VAX1	0.0031452	0.48909
VPS4A	3.31442e-10	0.622897
VWA1	1.86287e-10	0.598246
WDR60	4.67448e-07	0.591347
WDR76	3.70395e-08	0.650388
WHAMMP2	4.39232e-06	0.239739
WHAMMP3	6.26076e-09	0.254278
WHSC1	1.6753e-11	0.566277
WNK2	4.36774e-09	0.665925
WNT7B	3.51557e-09	0.621082
XPA	1.98481e-07	0.625062
XRCC2	8.21838e-10	0.544735
YEATS4	7.58409e-08	0.663741
YPEL1	0.00434754	0.647742
ZBED5-AS1	1.62211e-05	0.505038
ZC3H18	2.45831e-09	0.647445
ZC3H7B	2.46e-10	0.616184
ZDHHC13	2.43109e-08	0.633892
ZDHHC20	2.10008e-10	0.443262
ZDHHC8P1	1.15376e-05	0.492672
ZFP82	1.54241e-06	0.603419
ZFX	1.85514e-12	0.345549
ZFYVE28	0.0100809	0.596337
ZFYVE9	3.81802e-09	0.574771
ZKSCAN8	2.87813e-09	0.515943
ZMYND11	2.86454e-11	0.428606
ZNF174	4.694e-06	0.630623
ZNF236	7.65786e-07	0.655403
ZNF25	1.54939e-05	0.609211
ZNF275	9.33964e-10	0.514258
ZNF318	1.50351e-08	0.60994
ZNF319	7.46798e-10	0.327317
ZNF32	5.20929e-08	0.622846
ZNF337	5.68784e-08	0.572002
ZNF354C	3.22286e-05	0.596261
ZNF358	1.03621e-07	0.630362
ZNF362	1.02092e-06	0.588578
ZNF37A	9.68047e-10	0.654059
ZNF511	3.31442e-10	0.599918
ZNF618	6.69792e-08	0.619098
ZNF639	9.59065e-09	0.639367
ZNF66	0.00277168	0.657326
ZNF704	3.99997e-08	0.547549
ZNF71	9.52356e-05	0.496852
ZNF738	2.2459e-05	0.649
ZNF783	2.88547e-07	0.644644
ZNF835	0.0251052	0.375643
ZNRF2	2.43435e-09	0.350226
ZNRF2P2	0.0013276	0.279648
ZXDA	2.69785e-05	0.630551
ZYG11B	4.26371e-11	0.500828

## Sheet: Table S4E
Supplemental Table S4E. List of differentially expressed genes upon siZFX with promoters bound by ZFX in MCF-7
Gene Name	FDR (siZFX vs siCtrl)	Expression change (ratio)
AC009061.1	0.0410808	1.76556
AC079305.10	0.00365582	1.54584
ASNS	0.000120235	1.53548
BMS1P4	0.0283153	1.57692
C2CD4A	0.000813643	1.93904
CEBPB	7.22874e-05	1.55779
CHAC1	0.001305	1.66971
CPEB3	0.00733236	1.56472
DDIT3	7.19573e-05	1.61286
DNAJB9	0.00524448	1.58881
EAF2	0.00803617	1.75716
FKBP14	0.00203156	1.72046
GADD45A	0.000203965	1.70227
GLDN	0.00623725	1.60991
HBEGF	4.63754e-05	2.02054
HERPUD1	1.76877e-05	1.75728
HIST1H2BO	0.0276456	1.9357
HIST1H3D	0.00461585	1.67052
HSD17B7P2	0.000782537	1.65195
HSPA5	4.63754e-05	1.71972
HYOU1	0.000129011	1.50594
IER3	0.000191861	2.02312
MUC5AC	0.00514277	1.5938
PPP2R5B	0.000661765	1.56023
RAB24	0.000120235	1.50989
RP11-464F9.1	0.0336114	1.84151
SENP3-EIF4A1	0.00656476	1.83273
SERPINB8	0.00294616	1.52521
SLC7A5	0.00277308	1.78108
ST3GAL1	0.00525028	1.59392
TEX14	0.0119239	1.58323
TRIB3	7.19573e-05	1.70531
ABCB10	9.7441e-05	0.514383
AC007383.3	0.000359638	0.415126
AC009299.3	0.00093855	0.4249
AC147651.3	0.00396039	0.584713
ACADSB	3.36044e-05	0.501238
ACAT1	0.000317205	0.60214
ADAP2	0.0190546	0.48162
AGPAT3	9.85864e-05	0.661208
AKAP7	0.00093855	0.390494
AMER1	0.000180708	0.541274
AMIGO1	0.000181454	0.560923
AMZ2	0.000120235	0.635487
ANKRD13B	0.000861315	0.541526
ANKRD16	0.000338402	0.569126
ANKRD52	9.52654e-06	0.469924
AP001372.2	0.0315242	0.657163
APCDD1	0.00216715	0.530807
ARNT2	0.000352694	0.55941
ATP6V0E2	0.00281106	0.659603
B4GALT6	0.000196834	0.428595
BEND7	0.00021711	0.584721
BIVM	4.76383e-05	0.484024
BNC1	0.0252744	0.404634
C17orf75	0.00501767	0.648877
C19orf12	0.000313691	0.584956
C5orf42	0.000174731	0.501277
C6ORF165	0.049642	0.657044
CABLES2	0.000149559	0.647246
CAMK1	0.0144221	0.6649
CAPRIN2	0.00304501	0.610042
CCSAP	0.000630776	0.63721
CDC27	0.000222439	0.66187
CEBPA-AS1	0.0206704	0.593241
CEP112	0.0289761	0.487672
CEP19	0.0103158	0.538083
CEP68	0.000536898	0.643524
CNOT6L	0.000561148	0.632205
COCH	0.00130645	0.636996
CPQ	0.0381742	0.424992
CRTC3	4.63754e-05	0.550105
CRYZL1	0.012544	0.653628
CTA-445C9.14	0.015954	0.652115
CTC-241N9.1	0.0211832	0.632829
CTD-2083E4.4	0.0210414	0.555323
CTD-2292P10.4	0.00738764	0.355595
CTD-2366F13.1	0.0215477	0.664197
CTD-3074O7.5	0.0183662	0.600155
CYFIP2	7.22874e-05	0.476388
CYP46A1	0.0107198	0.594471
DENND1B	0.000784499	0.559452
DICER1-AS1	0.00113611	0.537955
DIRC2	3.36044e-05	0.441658
DIS3L	6.7955e-06	0.390331
DLAT	2.75713e-05	0.47674
DMTN	9.7441e-05	0.475809
DNAJC25-GNG10	0.00388092	0.58466
DOCK7	0.000167174	0.620587
DTD2	0.000181454	0.635789
ECHDC3	0.00743417	0.455276
EFCAB7	0.00914438	0.641177
EID2B	0.0120606	0.616168
EIF2AK2	0.00161719	0.651136
EIF2AK4	1.4715e-05	0.513487
EIF5A2	0.000919274	0.642712
ELAC1	0.019946	0.660955
ELMOD3	0.000196834	0.589394
EXOC5	0.000138877	0.578102
EYA2	0.000714553	0.514371
FAM169A	0.000174731	0.511871
FAM172A	0.000964451	0.613137
FAM174A	0.00552031	0.6438
FAM200B	0.001305	0.666056
FAM201A	0.00128394	0.576562
FAM20C	0.000353275	0.533754
FAM210B	0.000138877	0.654818
FAM211B	0.00783577	0.616096
FAM228B	0.0256773	0.620636
FAM58A	0.00690193	0.638348
FAM66C	0.00132014	0.354688
FAM92A1	0.000125885	0.50197
FAXC	0.0138999	0.460405
FBXO6	0.000359931	0.440417
FERMT1	0.00157698	0.605543
FN3K	0.000203147	0.538085
FRG1B	0.00392129	0.658123
FUCA1	0.000461214	0.646236
GPLD1	0.00627357	0.540733
GPR125	0.000220779	0.624597
GPR135	0.000292077	0.446062
H6PD	0.000120235	0.618252
HADH	0.000411695	0.628088
HCG11	0.000222453	0.578744
HERC3	0.0049403	0.643522
HOTAIR	0.00923065	0.551489
HOXA-AS3	0.0386127	0.370128
HOXA4	0.00400948	0.507232
HTR7P1	0.0355805	0.601908
HTRA1	0.00134494	0.609985
ICA1L	0.000411695	0.581876
IFIT5	0.000158568	0.567201
IFT57	0.000377365	0.646249
IFT74	0.00106444	0.501492
IL17D	0.000976294	0.658026
INVS	8.4633e-05	0.515643
IQCH-AS1	0.0049403	0.634516
KIAA1430	0.000412981	0.665415
KIAA2022	0.00311893	0.364526
KLHDC9	0.0137003	0.577405
KLHL23	0.00116942	0.594096
KLRG2	0.00630762	0.607013
LDLRAD4	0.00153623	0.580126
LGR4	0.000364065	0.642079
LIMS1	0.000714553	0.666478
LONRF1	1.4715e-05	0.42493
LRP3	0.00105379	0.620094
LRRC27	0.00498041	0.627198
LRRC41	4.63754e-05	0.54154
LRRK1	0.000695116	0.549677
LRRN2	0.0257871	0.596259
LRWD1	0.00245142	0.628649
LYRM9	0.000462045	0.452604
MAN2A2	5.56259e-05	0.593078
MAP6	0.00396661	0.179464
MAP9	0.000714553	0.561532
MBTPS2	0.000277556	0.666402
ME2	0.00079003	0.623496
MECOM	0.00128394	0.584136
MGAT5B	0.0102289	0.546323
MLH3	2.75713e-05	0.551052
MOB1A	7.22874e-05	0.638296
MRPL45	0.000161081	0.591401
MTERFD1	0.000299429	0.617077
MTERFD3	0.000461214	0.592887
MVB12B	1.4715e-05	0.279902
N4BP2L1	0.0353035	0.638459
NDFIP1	0.000317205	0.658577
NFATC4	0.00251204	0.528124
NMNAT3	0.0355805	0.503665
NNT-AS1	0.000462045	0.532224
NOX5	0.00334091	0.528454
NSMAF	1.4715e-05	0.524865
OGFRL1	0.000834368	0.648588
OSCP1	0.00208552	0.421659
PARD3B	0.00448611	0.597658
PARP3	0.0269566	0.635611
PAX5	0.0334758	0.522414
PAXIP1-AS1	0.000913167	0.617264
PCMTD1	0.0108487	0.656219
PDCD7	0.000158568	0.621145
PECR	0.00585594	0.653414
PELI3	0.000120235	0.47656
PIGZ	0.0011577	0.515797
PMS2P4	0.0410808	0.656109
POMGNT2	0.00323906	0.633868
PPP1R26-AS1	0.00341672	0.658846
PPP1R9A	0.00298017	0.55999
PRKACB	0.000955389	0.603196
PTGFRN	7.86874e-05	0.592461
PXDN	4.63754e-05	0.616336
PXK	0.000452383	0.534813
RAB11FIP2	0.00041409	0.48436
RAB36	0.000664497	0.396035
RAB40B	0.000315829	0.576233
RALGPS1	0.00100309	0.666474
RBM12B-AS1	0.0281158	0.625746
RBM41	0.000443837	0.55057
RBM43	0.00105379	0.592179
RBPMS2	0.00290971	0.477429
RCBTB2	0.0423284	0.45563
RFXAP	0.000443539	0.486828
RILPL1	0.00640203	0.633883
RIN3	0.000222453	0.430653
RIPPLY3	0.00044275	0.566824
RNF180	0.0188245	0.468524
RP11-145E5.5	0.0411508	0.556315
RP11-262H14.1	0.0159162	0.496879
RP11-307C12.12	0.0215149	0.576248
RP11-318M2.2	0.0353402	0.646941
RP11-341N2.1	0.0409874	0.356247
RP11-359E3.4	0.0104878	0.572638
RP11-393I2.4	0.0317687	0.447347
RP11-438J1.1	0.0271064	0.617503
RP11-453F18__B.1	0.00281106	0.55334
RP11-46A10.4	0.0352941	0.548488
RP11-46C24.7	0.00641993	0.629348
RP11-566K11.5	0.0498513	0.229923
RP9P	0.0042789	0.655375
RPGRIP1L	0.000619401	0.540484
SAMD11	0.000217592	0.629481
SEPT1	0.0213381	0.510403
SF3B1	1.4715e-05	0.593165
SIX1	0.00102395	0.523902
SKP2	5.10354e-05	0.511542
SLC35E4	0.00748427	0.648061
SMAD6	0.00312334	0.613663
SMKR1	0.00674871	0.572408
SOX18	0.00616896	0.451018
SPEF2	0.00634093	0.535999
SREK1IP1	0.000180708	0.558003
SSH1	4.63754e-05	0.568823
TCTN1	0.000179886	0.572465
TCTN2	0.00242372	0.599747
TESK1	0.00128394	0.59158
TFDP2	0.000170871	0.5952
TIMM17B	0.000137139	0.523657
TK2	0.00339882	0.586834
TMEM121	0.00674871	0.557738
TMEM189	4.63754e-05	0.509568
TMEM8B	0.0133318	0.5872
TRAF3IP1	0.000120235	0.520813
TRAM2-AS1	0.00248764	0.631678
TRANK1	0.000161081	0.58038
TRAPPC13	0.00148281	0.665508
TRDMT1	0.00510799	0.609318
TRIM68	0.0378998	0.635868
TSHZ1	0.000338402	0.5704
TSHZ3	0.0238938	0.622554
TTC12	0.00550306	0.6157
TTC30A	0.000861315	0.610219
TTC30B	0.000841495	0.639278
TTC8	1.76877e-05	0.4651
TWSG1	0.000129011	0.576205
TXNRD3	0.000919274	0.5915
ULK2	5.10354e-05	0.54341
UNC119	0.00116676	0.573453
VPS54	0.000188902	0.550542
WDR83	0.000499472	0.632925
WHAMMP2	0.00466025	0.155389
WHAMMP3	0.0177758	0.400236
XPA	0.0036865	0.654876
ZDHHC20	0.000245512	0.570299
ZFX	5.83574e-08	0.194073
ZFYVE9	0.000296276	0.561066
ZMYND11	0.000385959	0.650066
ZNF189	0.000161081	0.541232
ZNF25	0.0036865	0.639925
ZNF275	2.75713e-05	0.519919
ZNF319	0.000120235	0.447932
ZNF32	7.86874e-05	0.460018
ZNF354B	0.00155154	0.655471
ZNF354C	0.000180708	0.575994
ZNF449	0.00891481	0.654534
ZNF511	0.000407726	0.572256
ZNF514	0.000120235	0.586096
ZNF624	0.00145374	0.664758
ZXDA	0.0152596	0.622282
ZYG11B	5.4849e-05	0.540429
