# Supplementary material for: ZFX acts as a transcriptional activator in multiple types of human tumors by binding downstream from transcription start sites at the majority of CpG island promoters
Source: Genome Res. 2018 Mar;28(3):310–20. doi: 10.1101/gr.228809.117 (PMC5848610; doi:10.1101/gr.228809.117)
Supplement: Supplemental Material [file supp_gr.228809.117_Supplemental_Table_S5.xlsx]

## Sheet: Table S5
Supplemental Table S5. ZNF711 binding sites in MCF-7
chr2	206949562	206951279	Peak_1	5900	.	40.2726	590.098	581.386	945
chr12	53845568	53846924	Peak_2	4667	.	40.7069	466.728	459.773	777
chr14	31675709	31677915	Peak_3	3912	.	23.4625	391.294	384.609	1000
chrX	24167004	24168706	Peak_4	3605	.	39.0418	360.534	353.972	1032
chr10	180514	182402	Peak_5	2989	.	27.8405	298.947	292.637	1298
chr10	103453433	103455292	Peak_6	2983	.	32.4925	298.316	292.007	701
chr3	150320690	150321998	Peak_7	2686	.	21.3596	268.666	262.48	663
chr7	129251064	129252529	Peak_8	2614	.	21.179	261.422	255.26	787
chr8	59571141	59572878	Peak_9	2373	.	26.9821	237.345	231.284	836
chr22	21921766	21923157	Peak_10	2363	.	23.5321	236.371	230.315	510
chr2	162164562	162165696	Peak_11	2236	.	22.6089	223.686	217.696	603
chr6	76310996	76312853	Peak_12	2074	.	19.0606	207.486	201.579	949
chr1	154192533	154194421	Peak_13	2048	.	20.7624	204.888	198.992	1215
chr5	137688065	137689411	Peak_14	1996	.	18.5477	199.615	193.747	577
chr17	60004519	60005812	Peak_15	1987	.	9.44915	198.782	192.923	574
chr3	64008212	64009492	Peak_16	1968	.	5.09832	196.804	190.964	741
chr20	57267121	57268932	Peak_17	1936	.	9.45553	193.674	187.862	566
chr3	47204353	47206129	Peak_18	1935	.	21.8971	193.548	187.737	613
chr12	112545710	112546887	Peak_19	1919	.	20.3668	191.991	186.195	686
chr19	18942511	18943929	Peak_20	1802	.	18.5888	180.25	174.54	487
chr15	52860020	52861805	Peak_21	1795	.	13.7907	179.509	173.804	974
chr1	156736944	156738040	Peak_22	1785	.	19.3117	178.555	172.857	557
chr12	56651209	56652646	Peak_23	1753	.	17.9557	175.321	169.644	733
chr20	45985509	45987075	Peak_24	1726	.	4.79754	172.621	166.966	973
chr20	57225270	57227798	Peak_25	1718	.	10.1676	171.84	166.188	1218
chr19	4064953	4066104	Peak_26	1666	.	20.8857	166.619	161.005	718
chr17	60555534	60557376	Peak_27	1580	.	12.243	158.008	152.448	1111
chr5	141488097	141489295	Peak_28	1553	.	14.1709	155.353	149.808	596
chr12	74931232	74932863	Peak_29	1540	.	13.4899	154.037	148.502	509
chr3	25705270	25706469	Peak_30	1528	.	15.658	152.862	147.337	725
chr11	14541063	14542177	Peak_31	1525	.	22.4544	152.597	147.074	602
chr17	61851363	61852690	Peak_32	1524	.	10.4124	152.469	146.946	478
chr7	73588153	73589686	Peak_33	1478	.	17.8255	147.833	142.35	770
chr15	66585430	66586980	Peak_34	1470	.	16.5613	147.046	141.57	599
chr2	85197149	85199689	Peak_35	1467	.	15.8819	146.797	141.322	1889
chr7	72935506	72936727	Peak_36	1465	.	17.7781	146.533	141.06	710
chr7	135194182	135195064	Peak_37	1459	.	21.0104	145.995	140.526	412
chr1	206784958	206786134	Peak_38	1453	.	14.9574	145.388	139.925	752
chr17	38803242	38805160	Peak_39	1449	.	24.6288	144.956	139.496	1090
chr1	228674276	228675770	Peak_40	1449	.	17.8916	144.935	139.475	594
chr11	85375271	85376509	Peak_41	1444	.	14.4766	144.412	138.958	689
chr10	22629146	22630397	Peak_42	1421	.	16.542	142.169	136.734	585
chr2	54342070	54343134	Peak_43	1404	.	20.2308	140.431	135.017	571
chr16	1358680	1360333	Peak_44	1402	.	12.6693	140.269	134.856	531
chr17	48784433	48785620	Peak_45	1368	.	12.5228	136.877	131.502	606
chr14	69618117	69619218	Peak_46	1357	.	15.308	135.734	130.372	463
chr12	67662049	67664419	Peak_47	1355	.	13.6039	135.542	130.18	827
chr16	24550651	24551853	Peak_48	1343	.	13.4686	134.375	129.026	630
chr15	65425096	65426308	Peak_49	1324	.	16.5464	132.416	127.085	454
chr3	71802421	71803974	Peak_50	1310	.	21.7817	131.099	125.783	758
chr11	47787815	47789641	Peak_51	1306	.	11.6302	130.61	125.3	681
chr1	200638352	200639781	Peak_52	1295	.	12.9921	129.515	124.216	536
chr17	56769441	56770425	Peak_53	1292	.	5.06371	129.201	123.903	448
chr14	95622845	95624529	Peak_54	1275	.	12.4438	127.594	122.312	1180
chr3	12882676	12883655	Peak_55	1271	.	14.6518	127.199	121.924	499
chr3	47844214	47845351	Peak_56	1271	.	15.3111	127.186	121.91	656
chr11	63606324	63607207	Peak_57	1263	.	18.1799	126.381	121.111	484
chr11	64683656	64685096	Peak_58	1254	.	17.2245	125.499	120.238	1008
chr11	65292421	65293214	Peak_59	1252	.	16.8083	125.217	119.959	350
chr19	48893642	48894668	Peak_60	1251	.	13.6834	125.159	119.901	407
chr7	148395538	148397027	Peak_61	1251	.	13.5652	125.131	119.874	700
chr9	114245050	114246928	Peak_62	1241	.	13.3867	124.184	118.935	1288
chr3	9439099	9440347	Peak_63	1235	.	15.0473	123.502	118.261	513
chr9	21334708	21335737	Peak_64	1231	.	21.9386	123.178	117.939	547
chr6	33755664	33757171	Peak_65	1227	.	13.3454	122.797	117.563	964
chr3	138327171	138328524	Peak_66	1223	.	15.6937	122.362	117.133	527
chr14	69864242	69865715	Peak_67	1206	.	17.0506	120.647	115.436	551
chr19	57791130	57792665	Peak_68	1206	.	17.2865	120.645	115.434	859
chr1	115052720	115053930	Peak_69	1183	.	6.13754	118.387	113.196	754
chr22	35653169	35654268	Peak_70	1160	.	20.9892	116.093	110.921	494
chr7	148958848	148960100	Peak_71	1150	.	14.3879	115.01	109.845	634
chr10	65280345	65281967	Peak_72	1139	.	19.6722	113.954	108.797	1073
chr11	64884046	64885330	Peak_73	1099	.	11.8875	109.98	104.861	833
chr3	63848657	63850453	Peak_74	1099	.	5.42157	109.908	104.79	718
chr16	70284730	70286023	Peak_75	1095	.	13.0251	109.592	104.475	806
chr19	41769945	41771112	Peak_76	1082	.	14.7165	108.288	103.182	541
chr7	32529283	32530357	Peak_77	1081	.	12.1937	108.166	103.061	528
chr12	69633225	69634378	Peak_78	1078	.	12.4167	107.847	102.746	502
chr20	47538097	47539055	Peak_79	1071	.	4.77012	107.115	102.021	412
chr5	133511774	133512987	Peak_80	1054	.	16.2964	105.498	100.419	634
chr3	196729364	196730856	Peak_81	1045	.	12.0265	104.527	99.4563	529
chr2	100937350	100939411	Peak_82	1043	.	13.4647	104.31	99.2416	777
chr2	183901981	183903623	Peak_83	1041	.	12.3847	104.142	99.0761	805
chr2	160568453	160569888	Peak_84	1033	.	13.0816	103.342	98.2823	804
chr1	16693492	16694432	Peak_85	1027	.	14.6512	102.716	97.6635	415
chr8	103876297	103877299	Peak_86	1027	.	12.4696	102.707	97.6552	547
chr3	182697450	182698622	Peak_87	1018	.	11.527	101.862	96.8178	657
chr1	173990404	173991647	Peak_88	1016	.	11.2705	101.684	96.6404	677
chr11	16759702	16761008	Peak_89	1016	.	15.1273	101.666	96.623	653
chr20	52824279	52825508	Peak_90	1010	.	3.62504	101.008	95.9713	548
chr8	87526510	87527515	Peak_91	1008	.	10.6	100.881	95.8442	477
chr17	11923906	11925270	Peak_92	1002	.	10.6853	100.21	95.1793	622
chr11	74459611	74460792	Peak_93	993	.	12.1919	99.3069	94.2838	579
chr3	101292553	101293864	Peak_94	990	.	15.1556	99.0789	94.0589	768
chr2	43036707	43037779	Peak_95	987	.	10.151	98.7735	93.7568	619
chr2	64245415	64246969	Peak_96	986	.	17.1231	98.6519	93.6356	747
chr6	87861233	87862340	Peak_97	982	.	13.2378	98.2637	93.2505	519
chr17	38136798	38137653	Peak_98	981	.	18.6155	98.1182	93.1068	370
chr5	36876390	36877920	Peak_99	979	.	14.8525	97.9628	92.9525	1117
chrX	54070091	54071067	Peak_100	979	.	15.4736	97.9243	92.915	494
chr19	47615373	47616515	Peak_101	978	.	14.9313	97.8419	92.8344	659
chr5	78908091	78908970	Peak_102	977	.	17.707	97.7695	92.7632	387
chr10	116581118	116582521	Peak_103	977	.	16.0322	97.7246	92.7192	714
chr7	102789597	102790542	Peak_104	972	.	10.5269	97.218	92.2173	444
chr5	180687991	180689157	Peak_105	968	.	10.0022	96.8755	91.8778	665
chrX	21857450	21858578	Peak_106	967	.	18.3781	96.7637	91.7671	601
chr15	101834547	101835947	Peak_107	959	.	11.9538	95.9352	90.9477	590
chr11	66246921	66248085	Peak_108	952	.	12.4027	95.2951	90.3152	751
chr11	61196710	61197761	Peak_109	949	.	10.3085	94.9415	89.9663	562
chr20	45946913	45948934	Peak_110	949	.	3.61727	94.9214	89.9465	1648
chr18	67955775	67957387	Peak_111	942	.	14.4678	94.2929	89.3229	881
chr10	17243168	17244100	Peak_112	941	.	11.8409	94.1192	89.1529	498
chr22	41697509	41698760	Peak_113	940	.	18.1408	94.0676	89.1026	813
chr18	12407673	12408712	Peak_114	938	.	12.5854	93.8709	88.9086	433
chr6	90061625	90062911	Peak_115	933	.	11.9452	93.3522	88.3944	598
chr6	26521643	26522871	Peak_116	928	.	9.3771	92.8121	87.8613	473
chr2	105945700	105946982	Peak_117	928	.	17.1541	92.8041	87.8534	669
chr15	63796589	63797826	Peak_118	925	.	9.1182	92.5719	87.6259	517
chr9	100745223	100747738	Peak_119	925	.	10.6928	92.5705	87.6247	1113
chr15	72765932	72768133	Peak_120	918	.	11.6811	91.8941	86.9533	492
chr2	676868	677846	Peak_121	918	.	9.34962	91.8118	86.8738	484
chr5	130499836	130501058	Peak_122	915	.	13.2022	91.5502	86.6154	591
chr4	467117	468266	Peak_123	913	.	17.666	91.3888	86.4563	783
chr19	38145629	38147005	Peak_124	911	.	11.7811	91.116	86.1864	577
chr5	72793719	72795080	Peak_125	911	.	11.7811	91.116	86.1864	922
chr5	77071180	77072306	Peak_126	904	.	12.2777	90.4526	85.5298	623
chr16	66864162	66865136	Peak_127	901	.	15.2158	90.156	85.2362	429
chr7	128170903	128172535	Peak_128	900	.	17.5078	90.056	85.1374	805
chr6	116892029	116893238	Peak_129	896	.	11.4812	89.6825	84.769	588
chr10	44143596	44144689	Peak_130	894	.	13.9733	89.4524	84.5411	537
chr1	3712260	3713321	Peak_131	892	.	15.0211	89.2959	84.3869	507
chr13	21347270	21348309	Peak_132	887	.	12.7091	88.7536	83.8503	504
chr20	60813355	60814789	Peak_133	886	.	7.57634	88.6065	83.7053	514
chr3	121467400	121468633	Peak_134	883	.	13.2645	88.329	83.4308	839
chr3	129117554	129118920	Peak_135	881	.	13.6324	88.1804	83.2844	813
chr1	197871104	197872296	Peak_136	879	.	10.9264	87.9603	83.0665	683
chr9	33816940	33818376	Peak_137	873	.	16.2512	87.3023	82.4164	611
chr7	99716580	99717736	Peak_138	867	.	10.1545	86.7671	81.8875	524
chr3	142720098	142721153	Peak_139	864	.	14.7761	86.4261	81.5493	502
chr17	73780246	73781802	Peak_140	862	.	7.58468	86.2707	81.396	1076
chr10	13388996	13390550	Peak_141	862	.	12.7785	86.2009	81.3266	438
chr8	104310658	104311916	Peak_142	857	.	7.45916	85.7339	80.866	749
chr1	40722955	40724247	Peak_143	856	.	14.063	85.6054	80.7402	470
chr1	117909043	117910286	Peak_144	850	.	8.08161	85.009	80.1485	676
chr19	29703168	29704342	Peak_145	847	.	16.0329	84.7287	79.8714	642
chr7	77045149	77046391	Peak_146	843	.	14.3419	84.3655	79.5134	779
chr6	126111228	126112261	Peak_147	833	.	11.9153	83.3613	78.5222	565
chr12	2985463	2987023	Peak_148	827	.	12.4335	82.7486	77.9147	615
chr19	58513262	58514714	Peak_149	824	.	12.6996	82.4938	77.6635	698
chr9	134268935	134271114	Peak_150	817	.	9.00575	81.7355	76.9146	869
chr3	15247565	15249060	Peak_151	812	.	8.88602	81.2317	76.4164	489
chr13	111805141	111806300	Peak_152	807	.	14.0331	80.7121	75.9035	597
chr11	46614871	46615882	Peak_153	803	.	11.3544	80.3921	75.5871	556
chr15	59224972	59226129	Peak_154	802	.	14.0225	80.2942	75.4907	569
chr15	68569610	68570997	Peak_155	801	.	12.3915	80.1874	75.3846	681
chr5	43556184	43557756	Peak_156	799	.	10.0968	79.9849	75.184	707
chr3	128901798	128903650	Peak_157	799	.	10.7219	79.9033	75.1035	605
chr2	18741197	18742251	Peak_158	792	.	11.2665	79.2929	74.501	489
chr7	6413864	6415197	Peak_159	788	.	11.9322	78.899	74.1111	555
chr2	44588638	44589616	Peak_160	787	.	8.85921	78.7914	74.0051	443
chr17	59940141	59940916	Peak_161	784	.	3.24288	78.476	73.6946	344
chr11	66383311	66384139	Peak_162	784	.	10.144	78.4182	73.6372	389
chr15	57024819	57026074	Peak_163	784	.	13.3578	78.4092	73.6286	625
chr16	58033869	58035054	Peak_164	782	.	15.9253	78.2665	73.4875	544
chr7	43945307	43946641	Peak_165	775	.	9.97494	77.556	72.786	688
chr1	46767186	46769101	Peak_166	771	.	11.0028	77.1062	72.3406	1212
chr16	30620783	30621757	Peak_167	771	.	11.0467	77.1062	72.3406	540
chr17	61918849	61920345	Peak_168	769	.	5.56354	76.9568	72.1942	1003
chr3	51428429	51429681	Peak_169	766	.	13.5829	76.6675	71.9076	521
chr11	118660848	118662759	Peak_170	766	.	9.02098	76.6172	71.8585	629
chr20	49347956	49348762	Peak_171	763	.	3.00385	76.3196	71.5646	400
chr21	34915161	34916261	Peak_172	760	.	13.0639	76.0449	71.2914	424
chr5	134733899	134735352	Peak_173	760	.	10.9588	76.0187	71.2658	637
chr2	172290537	172291480	Peak_174	756	.	10.3222	75.6516	70.9031	472
chr3	157827590	157828694	Peak_175	756	.	10.3222	75.6516	70.9031	508
chr16	9185403	9186650	Peak_176	755	.	11.14	75.5978	70.8508	455
chr2	48009758	48010962	Peak_177	755	.	11.1856	75.5978	70.8508	741
chr17	57969664	57971229	Peak_178	754	.	3.07122	75.4963	70.7505	873
chr22	31364369	31366339	Peak_179	753	.	12.3796	75.3139	70.5706	1344
chr21	43299366	43300190	Peak_180	752	.	10.208	75.295	70.5526	377
chr5	176560289	176562210	Peak_181	752	.	8.25055	75.2669	70.5252	978
chr6	38670092	38671180	Peak_182	747	.	15.1915	74.7517	70.0155	608
chr16	89555881	89557249	Peak_183	746	.	8.92677	74.6471	69.9118	872
chr9	130953374	130954552	Peak_184	743	.	7.70018	74.3644	69.6343	435
chr20	44717728	44718825	Peak_185	741	.	12.3247	74.163	69.4356	573
chr6	110501017	110502007	Peak_186	741	.	13.7647	74.1077	69.3808	561
chr2	217363402	217364514	Peak_187	739	.	12.4079	73.9219	69.196	391
chr19	42746102	42747405	Peak_188	738	.	10.7829	73.8556	69.1302	513
chr3	183872761	183874085	Peak_189	736	.	12.77	73.6984	68.976	633
chr4	15656167	15657744	Peak_190	733	.	14.032	73.353	68.6364	565
chr1	24306104	24307151	Peak_191	731	.	15.2132	73.1519	68.4374	463
chr1	11072140	11073456	Peak_192	727	.	10.6071	72.7801	68.0698	787
chr19	30205754	30206984	Peak_193	725	.	10.0824	72.5029	67.796	462
chr7	148892531	148894060	Peak_194	725	.	10.0025	72.5029	67.796	461
chr15	95387786	95388782	Peak_195	724	.	9.53531	72.4203	67.7155	541
chr13	42534705	42535796	Peak_196	722	.	11.2483	72.2011	67.4996	649
chr2	58273444	58274683	Peak_197	722	.	11.2972	72.2011	67.4996	621
chr5	145826661	145827856	Peak_198	718	.	13.0176	71.8957	67.1978	602
chr1	33116476	33117682	Peak_199	718	.	12.0499	71.8745	67.1778	507
chr1	114353911	114355277	Peak_200	718	.	5.14809	71.8323	67.1364	677
chr7	105751830	105753331	Peak_201	717	.	8.67556	71.718	67.0225	679
chr14	69282747	69283679	Peak_202	716	.	7.50479	71.6443	66.9508	487
chr13	27825362	27826395	Peak_203	716	.	12.1276	71.6222	66.9293	449
chr14	61747084	61748615	Peak_204	707	.	8.61275	70.7487	66.0653	601
chr20	50384197	50385015	Peak_205	705	.	6.84111	70.588	65.9087	495
chr19	4123545	4124469	Peak_206	701	.	10.684	70.1728	65.4978	410
chr12	46122596	46125047	Peak_207	699	.	13.6278	69.9502	65.2794	1910
chr16	2801632	2803540	Peak_208	697	.	10.8142	69.7258	65.0567	645
chr4	99181296	99182458	Peak_209	696	.	13.9221	69.6785	65.0103	734
chr17	77817279	77818604	Peak_210	695	.	8.86946	69.5244	64.86	731
chr10	131908556	131910195	Peak_211	693	.	9.80267	69.3894	64.7259	450
chr2	128458941	128460075	Peak_212	691	.	9.32436	69.1702	64.5106	580
chr1	197743677	197744974	Peak_213	689	.	7.38267	68.9529	64.2951	455
chr5	137089020	137091081	Peak_214	685	.	10.2993	68.5191	63.8659	696
chr7	16460217	16461770	Peak_215	684	.	11.6652	68.4756	63.8242	658
chr2	85645025	85646244	Peak_216	683	.	9.16896	68.3797	63.7295	558
chr17	79366879	79368178	Peak_217	683	.	9.68277	68.3597	63.7106	926
chr7	108209470	108210926	Peak_218	683	.	9.68277	68.3597	63.7106	424
chr10	22540617	22542011	Peak_219	678	.	10.8087	67.8208	63.1772	801
chr9	86237519	86239033	Peak_220	678	.	11.1588	67.8022	63.1589	786
chr17	63557046	63557999	Peak_221	678	.	7.81092	67.8015	63.1585	490
chr5	179159755	179160880	Peak_222	677	.	9.12062	67.7586	63.1164	353
chr15	34501477	34502443	Peak_223	671	.	12.4524	67.1998	62.5665	539
chr5	96518359	96519522	Peak_224	670	.	11.6229	67.0779	62.4457	813
chr2	175112418	175113908	Peak_225	670	.	9.5335	67.0049	62.3734	636
chr20	56884595	56885396	Peak_226	667	.	6.19644	66.7878	62.1587	398
chr1	29062897	29064510	Peak_227	667	.	11.9472	66.7693	62.1402	877
chr19	16737870	16738988	Peak_228	664	.	10.0795	66.4139	61.7887	614
chrX	106361348	106362366	Peak_229	656	.	14.1055	65.6354	61.0199	514
chr15	89877298	89878390	Peak_230	656	.	8.5651	65.6195	61.0053	612
chr6	170151091	170152719	Peak_231	656	.	8.59892	65.6195	61.0053	853
chr20	60641101	60641856	Peak_232	655	.	7.58915	65.5988	60.9853	337
chr16	31519425	31520561	Peak_233	654	.	10.4352	65.4227	60.8098	589
chr2	75873458	75874637	Peak_234	654	.	10.3878	65.4227	60.8098	579
chr14	93650487	93651749	Peak_235	651	.	9.02631	65.1606	60.5519	439
chr9	110045524	110046555	Peak_236	646	.	7.91432	64.6318	60.0292	601
chr20	58514392	58515474	Peak_237	643	.	6.16976	64.343	59.7456	483
chr17	65362057	65363042	Peak_238	642	.	6.32013	64.2441	59.6485	443
chr8	99305796	99306869	Peak_239	639	.	7.59513	63.9782	59.385	621
chr1	9294548	9295570	Peak_240	638	.	13.2822	63.8765	59.2842	449
chr14	105766564	105767693	Peak_241	636	.	7.74548	63.6046	59.0157	527
chr1	23669886	23670970	Peak_242	627	.	9.9543	62.7567	58.178	536
chr3	50396251	50397164	Peak_243	627	.	9.90869	62.7567	58.178	382
chr5	179222367	179223883	Peak_244	625	.	8.15491	62.58	58.0042	607
chr1	150946319	150947481	Peak_245	625	.	6.41174	62.5778	58.0021	686
chr2	201676433	201677487	Peak_246	624	.	11.6339	62.4669	57.8918	426
chr12	54411367	54412496	Peak_247	624	.	10.3202	62.4458	57.8709	616
chr2	217276805	217277885	Peak_248	623	.	10.5426	62.3506	57.7779	531
chr16	69345125	69346056	Peak_249	621	.	7.98471	62.1908	57.6213	350
chr19	10216833	10217674	Peak_250	621	.	13.1437	62.1423	57.5733	377
chr4	109571180	109572240	Peak_251	619	.	13.5517	61.9507	57.3825	523
chrX	154841720	154842861	Peak_252	619	.	13.6308	61.9507	57.3825	548
chr7	94138928	94139923	Peak_253	617	.	9.43223	61.7908	57.2257	525
chr14	75642636	75643550	Peak_254	617	.	10.2156	61.7475	57.1837	526
chr17	66031631	66032566	Peak_255	617	.	5.58936	61.7205	57.1567	441
chr3	193858944	193860059	Peak_256	614	.	8.61942	61.4611	56.8991	700
chr18	72264117	72265469	Peak_257	614	.	11.7616	61.4418	56.8808	468
chr3	141120529	141121625	Peak_258	613	.	9.1975	61.3596	56.7997	567
chr19	34662745	34664242	Peak_259	612	.	10.4398	61.2744	56.715	402
chr15	74907530	74908873	Peak_260	612	.	9.04331	61.2672	56.7082	709
chr11	107879395	107880464	Peak_261	611	.	13.3339	61.1311	56.5771	538
chr3	13460884	13462251	Peak_262	605	.	7.26139	60.5589	56.0121	535
chr16	3507356	3508883	Peak_263	603	.	9.07447	60.3555	55.8105	373
chr9	139760435	139761395	Peak_264	603	.	7.7963	60.331	55.7865	552
chr2	29117353	29118354	Peak_265	602	.	8.96338	60.2711	55.7286	559
chr5	135468320	135469187	Peak_266	602	.	8.92341	60.2711	55.7286	448
chr5	56247191	56248394	Peak_267	602	.	10.2858	60.2031	55.6616	516
chr6	144163900	144165446	Peak_268	602	.	9.42009	60.203	55.6616	648
chr9	35071372	35072561	Peak_269	598	.	8.12548	59.8794	55.3421	592
chr4	85886632	85887812	Peak_270	597	.	10.5229	59.7431	55.2073	738
chr17	66097555	66098686	Peak_271	596	.	6.03448	59.6109	55.0775	378
chr10	6130804	6131689	Peak_272	593	.	6.74765	59.3418	54.8116	441
chr15	93257465	93258269	Peak_273	592	.	8.88345	59.2794	54.7499	459
chr10	22725485	22726777	Peak_274	592	.	9.97829	59.2766	54.7481	481
chr5	177659191	177660201	Peak_275	592	.	8.50472	59.2689	54.7414	550
chr5	107716348	107717925	Peak_276	591	.	9.37613	59.1837	54.6564	731
chr10	63660648	63661703	Peak_277	591	.	11.4475	59.175	54.6487	473
chr20	62586959	62588098	Peak_278	589	.	8.02402	58.9368	54.4134	535
chr15	83478192	83479476	Peak_279	586	.	8.22631	58.6664	54.1454	526
chr7	131012452	131013377	Peak_280	586	.	9.49825	58.6178	54.0973	419
chr1	6684922	6685943	Peak_281	585	.	10.6211	58.5349	54.0165	475
chr6	41395600	41396411	Peak_282	585	.	10.5112	58.5349	54.0165	389
chr11	47586742	47587865	Peak_283	582	.	8.80351	58.2921	53.7769	454
chr10	28821116	28823372	Peak_284	582	.	9.8806	58.2299	53.7157	1902
chr3	182511266	182512170	Peak_285	582	.	9.7829	58.2299	53.7157	361
chr10	88470760	88472159	Peak_286	579	.	11.9025	57.9271	53.4192	643
chr14	50778821	50779742	Peak_287	574	.	10.4013	57.4553	52.9528	435
chr16	48277986	48279141	Peak_288	574	.	10.4562	57.4553	52.9528	585
chr5	132298241	132299974	Peak_289	573	.	8.35569	57.3391	52.8383	760
chr15	78729880	78731466	Peak_290	572	.	7.27655	57.2526	52.7533	970
chr14	103799542	103800734	Peak_291	571	.	9.11235	57.1589	52.6611	487
chr7	102988027	102988839	Peak_292	571	.	7.28643	57.1347	52.6382	403
chr8	141644208	141645772	Peak_293	570	.	8.14447	57.0466	52.5518	986
chr13	60971045	60972288	Peak_294	567	.	10.7129	56.7068	52.2166	726
chr20	49406979	49407765	Peak_295	566	.	2.74686	56.686	52.1962	443
chr10	94050737	94051625	Peak_296	566	.	8.21643	56.644	52.1548	421
chr9	96337942	96340124	Peak_297	566	.	10.0439	56.6072	52.1186	1553
chr1	151299477	151300340	Peak_298	565	.	7.40718	56.589	52.1005	399
chr5	72111767	72113149	Peak_299	563	.	10.3463	56.3808	51.8945	556
chr20	47662770	47663627	Peak_300	563	.	7.21793	56.3608	51.8754	440
chr2	25895368	25896430	Peak_301	561	.	9.58751	56.1511	51.6683	473
chr1	166844828	166845745	Peak_302	559	.	9.82354	55.9674	51.4878	451
chr2	27592625	27594302	Peak_303	559	.	9.8749	55.9674	51.4878	1150
chr22	17639411	17640964	Peak_304	559	.	11.2687	55.9511	51.4725	1035
chr11	576222	577259	Peak_305	559	.	12.7605	55.9256	51.4473	476
chr5	64063664	64064830	Peak_306	559	.	12.7605	55.9256	51.4473	630
chr9	139939737	139941117	Peak_307	558	.	7.98052	55.8362	51.3593	508
chr5	180257908	180259117	Peak_308	556	.	8.14316	55.6936	51.2191	466
chr7	150065063	150066532	Peak_309	554	.	10.0404	55.4633	50.9916	564
chr20	62338626	62340104	Peak_310	554	.	5.38162	55.4413	50.9702	571
chr17	45265786	45266879	Peak_311	554	.	4.2526	55.4126	50.9417	624
chr2	205409823	205410875	Peak_312	553	.	8.48379	55.3574	50.8873	469
chr11	118964680	118966317	Peak_313	551	.	6.70495	55.1661	50.6991	968
chr13	28712613	28713665	Peak_314	551	.	12.3277	55.1641	50.6974	671
chr2	61696694	61698082	Peak_315	551	.	8.98046	55.1531	50.6865	967
chr14	64970605	64972046	Peak_316	551	.	6.27682	55.1156	50.6506	1102
chr3	141456918	141457856	Peak_317	550	.	8.46221	55.0699	50.6051	457
chr7	149193985	149195102	Peak_318	548	.	7.41948	54.8475	50.3848	608
chr2	170683761	170684733	Peak_319	547	.	8.06989	54.7477	50.2865	496
chr20	2450844	2451663	Peak_320	547	.	10.8823	54.7065	50.2469	436
chr20	50807725	50808917	Peak_321	546	.	7.75746	54.6677	50.2089	332
chr17	79603513	79604418	Peak_322	545	.	10.5366	54.5283	50.0707	377
chr8	98656119	98657760	Peak_323	544	.	5.42103	54.4402	49.9842	668
chr3	10183171	10184207	Peak_324	542	.	7.65203	54.2871	49.8342	532
chr5	176432859	176433957	Peak_325	542	.	7.61822	54.2871	49.8342	680
chr17	61522874	61524976	Peak_326	542	.	4.39945	54.2484	49.7963	1140
chr20	34329345	34330987	Peak_327	541	.	8.80461	54.1574	49.7063	645
chr3	179040387	179041872	Peak_328	541	.	8.84858	54.1574	49.7063	1129
chr7	73096939	73098372	Peak_329	541	.	8.80461	54.1574	49.7063	505
chr19	15442232	15443379	Peak_330	540	.	9.34328	54.0923	49.6431	756
chr6	131456271	131457262	Peak_331	539	.	9.25086	53.9693	49.5217	452
chr8	125985397	125986196	Peak_332	539	.	7.29387	53.948	49.5007	370
chr9	117349747	117350827	Peak_333	538	.	7.95998	53.8062	49.3605	380
chr15	50646079	50648210	Peak_334	537	.	6.52474	53.7982	49.3536	1146
chr17	58602628	58603731	Peak_335	536	.	2.98887	53.6995	49.256	796
chr1	245132889	245134755	Peak_336	535	.	12.3648	53.558	49.1156	592
chr4	103422013	103423584	Peak_337	533	.	9.37779	53.3986	48.9605	773
chr7	56031872	56033027	Peak_338	531	.	9.96165	53.1892	48.7537	708
chr1	29507372	29508403	Peak_339	531	.	8.76065	53.1666	48.7319	698
chr3	125238464	125239322	Peak_340	531	.	8.71669	53.1666	48.7319	358
chr6	146055839	146057004	Peak_341	531	.	8.71669	53.1666	48.7319	572
chr20	57616889	57618128	Peak_342	530	.	5.09412	53.0331	48.6013	745
chr14	39644100	39645236	Peak_343	528	.	7.88671	52.8693	48.4387	716
chr3	169898483	169899560	Peak_344	528	.	7.55266	52.8293	48.4012	646
chr19	49998930	49999748	Peak_345	528	.	12.0955	52.8198	48.3918	510
chr17	78518436	78519437	Peak_346	528	.	8.49866	52.8128	48.3851	464
chr21	44313244	44314063	Peak_347	526	.	6.2836	52.6208	48.1946	429
chr4	39978055	39979941	Peak_348	525	.	10.6939	52.5059	48.0813	532
chr5	131704946	131706173	Peak_349	524	.	8.24399	52.4644	48.0405	475
chr14	54907342	54908277	Peak_350	524	.	5.52926	52.464	48.0405	577
chr1	42921453	42922832	Peak_351	523	.	12.2066	52.3837	47.9611	1030
chr14	90722692	90723569	Peak_352	523	.	9.22993	52.3777	47.9558	395
chr1	63153215	63154419	Peak_353	523	.	9.27922	52.3777	47.9558	587
chr19	59030416	59031547	Peak_354	523	.	9.66507	52.3084	47.8875	677
chr14	74353217	74354405	Peak_355	521	.	7.66449	52.1238	47.7065	531
chr12	27932653	27934030	Peak_356	520	.	9.14789	52.054	47.6373	632
chr2	200819764	200821447	Peak_357	515	.	8.29528	51.5248	47.1163	815
chr2	70417576	70418477	Peak_358	515	.	8.29528	51.5248	47.1163	413
chr9	132585308	132586585	Peak_359	515	.	8.21326	51.5248	47.1163	403
chr9	125675068	125675899	Peak_360	513	.	9.46925	51.3868	46.9803	407
chr5	37248837	37249893	Peak_361	513	.	9.13136	51.362	46.9556	352
chr7	148844360	148845237	Peak_362	512	.	8.06543	51.2359	46.8323	354
chr1	55680335	55681415	Peak_363	510	.	9.05019	51.0427	46.6442	536
chr5	32443730	32445149	Peak_364	510	.	7.6669	51.0093	46.6119	514
chr17	26219721	26220522	Peak_365	510	.	11.4504	51.0033	46.6072	443
chr10	104180433	104181509	Peak_366	508	.	10.2667	50.8379	46.4443	718
chr17	16556424	16557291	Peak_367	508	.	10.3902	50.8379	46.4443	364
chr9	35604899	35606061	Peak_368	508	.	10.3902	50.8379	46.4443	513
chr1	204485193	204486100	Peak_369	505	.	8.08413	50.5596	46.1699	454
chr1	109203480	109204542	Peak_370	502	.	8.49687	50.2241	45.8402	520
chr1	202112851	202114118	Peak_371	501	.	6.11264	50.1624	45.7802	587
chr21	45284110	45285993	Peak_372	501	.	6.13706	50.1624	45.7802	1296
chr5	138940668	138942054	Peak_373	500	.	7.59363	50.0862	45.7051	773
chr20	45989033	45989799	Peak_374	500	.	2.7141	50.0812	45.701	442
chr11	46866824	46868058	Peak_375	500	.	6.65934	50.0185	45.6408	725
chr15	91207944	91208988	Peak_376	497	.	7.68508	49.7994	45.4237	587
chr16	67926999	67927838	Peak_377	497	.	7.24622	49.7463	45.3717	412
chr12	49109794	49110953	Peak_378	496	.	11.1562	49.6545	45.2809	490
chr14	75517424	75518324	Peak_379	495	.	7.49371	49.5842	45.2123	494
chr20	33679864	33681060	Peak_380	493	.	11.5537	49.3509	44.9809	481
chr6	24494891	24495686	Peak_381	493	.	7.86705	49.3477	44.9779	461
chr2	157291883	157293133	Peak_382	493	.	6.23946	49.301	44.9327	575
chr19	35167901	35169384	Peak_383	492	.	8.32102	49.2535	44.8853	880
chr2	152266277	152267179	Peak_384	492	.	8.36499	49.2535	44.8853	535
chr3	45730761	45731544	Peak_385	492	.	8.36499	49.2535	44.8853	378
chr5	179718292	179719842	Peak_386	492	.	8.36499	49.2535	44.8853	446
chr1	70686830	70688007	Peak_387	488	.	11.6527	48.8995	44.5377	708
chr20	3139907	3140694	Peak_388	488	.	11.6527	48.8995	44.5377	396
chr16	30913276	30914142	Peak_389	488	.	7.17859	48.8517	44.4911	453
chr15	34330626	34331657	Peak_390	487	.	11.0108	48.7417	44.3827	591
chr1	216773992	216774816	Peak_391	486	.	6.88565	48.6412	44.2846	435
chr12	751586	752639	Peak_392	485	.	11.0107	48.5304	44.1748	460
chr14	21905144	21906100	Peak_393	485	.	11.0834	48.5304	44.1748	441
chr9	125666671	125667889	Peak_394	485	.	6.63176	48.5181	44.163	752
chr6	41040647	41041559	Peak_395	483	.	9.65771	48.3882	44.0348	362
chr12	125051254	125052229	Peak_396	482	.	8.2331	48.288	43.9354	617
chr9	125693247	125694260	Peak_397	482	.	7.48372	48.2544	43.9028	409
chr16	20817133	20817922	Peak_398	480	.	8.75711	48.041	43.6927	396
chr5	147763392	147764193	Peak_399	480	.	8.70826	48.041	43.6927	343
chr1	35657491	35658873	Peak_400	479	.	9.30221	47.9798	43.6328	563
chr17	59488524	59490218	Peak_401	477	.	2.30108	47.7929	43.4489	685
chrX	130036713	130037528	Peak_402	477	.	11.4154	47.7515	43.4082	474
chr3	122233012	122234001	Peak_403	477	.	5.99052	47.7394	43.3971	478
chr6	64345719	64346800	Peak_404	477	.	7.7644	47.7391	43.397	642
chr7	154794905	154795801	Peak_405	477	.	7.80436	47.7391	43.397	467
chr3	125093491	125094717	Peak_406	476	.	9.89621	47.6246	43.2848	476
chr3	51572387	51573480	Peak_407	476	.	10.8643	47.6206	43.2811	426
chr5	96142905	96143996	Peak_408	474	.	10.2068	47.4901	43.1518	479
chr14	45721528	45723433	Peak_409	474	.	7.74801	47.4793	43.1409	1282
chr7	44529629	44530495	Peak_410	473	.	8.6385	47.3532	43.016	385
chr5	16465121	16466705	Peak_411	470	.	9.59625	47.0812	42.7487	1144
chr16	82044516	82045391	Peak_412	470	.	7.04332	47.0764	42.7443	395
chr14	89029302	89030123	Peak_413	470	.	6.74792	47.0164	42.6867	317
chr5	138088369	138089829	Peak_414	469	.	8.49288	46.9956	42.6661	965
chr2	70520225	70521102	Peak_415	469	.	9.13735	46.9551	42.6259	527
chr11	61129159	61129999	Peak_416	467	.	7.76215	46.7878	42.4622	487
chr3	120314933	120315758	Peak_417	465	.	9.21168	46.5909	42.268	443
chr19	33182510	33183703	Peak_418	464	.	7.30054	46.442	42.1212	637
chr20	61556886	61558050	Peak_419	462	.	5.63782	46.2919	41.974	795
chr20	60717511	60718593	Peak_420	462	.	4.88753	46.2796	41.9619	594
chr15	75870576	75871930	Peak_421	461	.	6.94187	46.1958	41.8784	463
chr6	52441686	52442597	Peak_422	461	.	6.94187	46.1958	41.8784	490
chr3	160282379	160283504	Peak_423	461	.	7.8197	46.1023	41.7864	499
chr11	130785782	130786663	Peak_424	460	.	9.81465	46.0465	41.7324	447
chr19	11750543	11751324	Peak_425	460	.	9.81465	46.0465	41.7324	422
chr9	134614650	134615372	Peak_426	458	.	6.40951	45.8788	41.5692	387
chr3	140660708	140661664	Peak_427	458	.	7.03244	45.8034	41.4944	481
chr7	116502584	116503355	Peak_428	457	.	8.17572	45.708	41.3997	392
chr2	225448777	225450234	Peak_429	456	.	10.2539	45.6189	41.3113	774
chr14	35342598	35344081	Peak_430	455	.	9.22792	45.5846	41.2772	466
chr5	65220709	65222448	Peak_431	455	.	9.09953	45.568	41.2608	584
chr13	53024101	53025013	Peak_432	455	.	7.19064	45.5432	41.2362	447
chr14	21851563	21852586	Peak_433	455	.	9.64923	45.5129	41.2068	540
chr16	66729713	66730583	Peak_434	454	.	11.0198	45.4759	41.1703	444
chr12	69863849	69864797	Peak_435	454	.	7.96932	45.4234	41.119	459
chr16	22308582	22309379	Peak_436	453	.	6.87423	45.3201	41.0176	373
chr5	179050064	179051938	Peak_437	452	.	5.98086	45.233	40.9316	413
chr9	127623548	127624428	Peak_438	451	.	6.16232	45.1606	40.861	471
chr16	4321151	4322809	Peak_439	451	.	6.33868	45.1437	40.8444	798
chr2	234474701	234475521	Peak_440	450	.	9.30238	45.0067	40.71	504
chr10	97802796	97804076	Peak_441	449	.	7.5246	44.9643	40.6684	577
chr8	90769441	90770574	Peak_442	448	.	6.00951	44.8327	40.5384	424
chr7	6769090	6770163	Peak_443	447	.	8.03891	44.7518	40.4586	590
chr8	102504905	102506811	Peak_444	447	.	5.58268	44.7379	40.4452	1127
chr7	40173623	40174531	Peak_445	445	.	8.98738	44.5511	40.2599	368
chr19	11070766	11071600	Peak_446	444	.	7.8814	44.4793	40.1892	379
chr1	180471148	180472293	Peak_447	444	.	6.77278	44.4491	40.1602	639
chr12	113622589	113623780	Peak_448	444	.	6.77278	44.4491	40.1602	477
chr14	53173464	53174670	Peak_449	444	.	6.77278	44.4491	40.1602	662
chr3	135913748	135916379	Peak_450	444	.	6.84041	44.4491	40.1602	2000
chr14	74252993	74254391	Peak_451	444	.	5.90328	44.432	40.1444	806
chr13	26795420	26796871	Peak_452	441	.	8.70004	44.1403	39.8564	493
chr13	99228308	99230065	Peak_453	440	.	10.4284	44.0999	39.8172	1281
chr6	74229935	74230942	Peak_454	440	.	7.4047	44.0498	39.7679	568
chr9	25677312	25678772	Peak_455	440	.	7.44467	44.0498	39.7679	511
chr2	75937337	75938390	Peak_456	439	.	9.12606	43.9788	39.6987	518
chr6	34759649	34760568	Peak_457	439	.	9.12606	43.9788	39.6987	376
chr10	76970250	76971332	Peak_458	439	.	9.50063	43.943	39.6635	457
chr1	38273204	38274472	Peak_459	439	.	9.43783	43.943	39.6635	437
chr4	110354199	110355746	Peak_460	439	.	9.50063	43.943	39.6635	1017
chr3	5229183	5230188	Peak_461	439	.	6.76761	43.9113	39.6336	504
chr2	176045310	176046454	Peak_462	438	.	7.39092	43.8037	39.5262	576
chr11	82782946	82783694	Peak_463	437	.	8.43686	43.7693	39.4927	343
chr2	216176664	216177450	Peak_464	437	.	8.48822	43.7693	39.4927	384
chr7	32996675	32997707	Peak_465	436	.	5.82569	43.6353	39.3606	574
chr20	62371672	62372696	Peak_466	435	.	5.08565	43.5151	39.2437	666
chr5	68389625	68390470	Peak_467	434	.	6.44602	43.496	39.2247	341
chr13	47370742	47371476	Peak_468	433	.	6.2049	43.3855	39.116	385
chr10	8091825	8094374	Peak_469	433	.	6.98756	43.3023	39.0333	1550
chr5	159826496	159827394	Peak_470	432	.	10.7824	43.2285	38.9601	466
chr21	43933436	43935033	Peak_471	432	.	5.51326	43.2002	38.9335	518
chr22	41864418	41865721	Peak_472	431	.	8.21978	43.1495	38.8833	457
chr5	81573590	81574606	Peak_473	431	.	8.21978	43.1495	38.8833	423
chr9	133709970	133711329	Peak_474	431	.	8.17094	43.1495	38.8833	443
chr7	100486731	100487539	Peak_475	429	.	6.5836	42.9377	38.6756	408
chr15	38746007	38746924	Peak_476	429	.	8.64277	42.9159	38.654	451
chr15	45458653	45459692	Peak_477	429	.	8.69772	42.9159	38.654	412
chr15	91072710	91074037	Peak_478	428	.	7.27188	42.898	38.6374	653
chr14	60558394	60559137	Peak_479	426	.	6.38321	42.6549	38.3982	378
chr15	85290854	85292977	Peak_480	426	.	6.41462	42.6549	38.3982	683
chr3	160822288	160823445	Peak_481	424	.	5.97721	42.4793	38.2251	447
chr8	91657691	91658496	Peak_482	424	.	5.80273	42.4097	38.1564	372
chr6	32937269	32938582	Peak_483	423	.	9.7044	42.3958	38.1427	731
chr2	239111271	239112804	Peak_484	422	.	7.24484	42.2367	37.985	697
chr22	20849255	20850549	Peak_485	421	.	8.02439	42.1885	37.9379	500
chr2	136499211	136500298	Peak_486	421	.	7.31104	42.1805	37.9308	516
chr3	196439143	196440101	Peak_487	421	.	7.31104	42.1805	37.9308	387
chr2	109150144	109151539	Peak_488	421	.	8.43197	42.1572	37.9082	878
chr16	9056394	9057291	Peak_489	421	.	9.91455	42.1565	37.9077	545
chr17	21002167	21002882	Peak_490	421	.	10.545	42.1156	37.8671	340
chr2	74405234	74406099	Peak_491	419	.	6.89755	41.9984	37.7511	431
chr20	21283601	21284543	Peak_492	419	.	8.94974	41.942	37.6958	564
chr7	6629313	6630338	Peak_493	418	.	6.60369	41.8658	37.6217	375
chr19	13228795	13229787	Peak_494	418	.	9.24941	41.8655	37.6217	511
chr1	116960591	116961653	Peak_495	418	.	6.27127	41.8522	37.6093	601
chr5	171432522	171433866	Peak_496	418	.	7.04305	41.8329	37.5905	867
chr2	27651208	27652403	Peak_497	418	.	6.35181	41.8187	37.5765	573
chr1	176175500	176176407	Peak_498	418	.	8.23143	41.8163	37.5751	458
chr8	48173014	48173881	Peak_499	416	.	7.57366	41.6804	37.4405	342
chr17	20945565	20946443	Peak_500	413	.	7.16491	41.3383	37.1022	520
chr2	99224567	99225828	Peak_501	413	.	6.59695	41.3299	37.0949	630
chr10	25011662	25012654	Peak_502	412	.	7.82965	41.2326	36.9994	521
chr12	6492712	6494173	Peak_503	411	.	6.78764	41.1252	36.893	524
chr14	77842900	77843845	Peak_504	410	.	6.01628	41.0281	36.798	435
chr11	32913863	32915208	Peak_505	408	.	9.7733	40.8494	36.6242	931
chr6	4021518	4022442	Peak_506	408	.	9.91887	40.8494	36.6242	399
chr11	11862810	11864232	Peak_507	408	.	9.061	40.8368	36.6129	1001
chr17	29297869	29298725	Peak_508	408	.	9.25263	40.8117	36.5882	352
chr9	98637280	98638709	Peak_509	406	.	8.8693	40.6375	36.4163	592
chr16	23463891	23464643	Peak_510	405	.	7.84994	40.556	36.3354	364
chr2	128051206	128051956	Peak_511	405	.	7.94851	40.556	36.3354	307
chr20	16710395	16711301	Peak_512	405	.	8.42663	40.546	36.3259	387
chrX	107069128	107070375	Peak_513	405	.	8.48271	40.546	36.3259	489
chr2	9614021	9615418	Peak_514	404	.	6.49455	40.4796	36.2603	884
chr3	10289952	10290705	Peak_515	403	.	6.35117	40.3951	36.1774	369
chr2	20549811	20550691	Peak_516	403	.	8.55004	40.3744	36.157	443
chr16	67876016	67876972	Peak_517	403	.	8.97003	40.3462	36.1289	336
chr13	115000142	115001088	Peak_518	402	.	7.82901	40.2846	36.0684	443
chr19	33864045	33865302	Peak_519	402	.	7.78016	40.2846	36.0684	798
chr5	141348419	141349378	Peak_520	402	.	7.87785	40.2846	36.0684	474
chr12	49075274	49076099	Peak_521	402	.	9.49832	40.2815	36.0666	498
chr22	46067688	46068643	Peak_522	402	.	9.42963	40.2815	36.0666	495
chr3	40498629	40499396	Peak_523	402	.	9.42963	40.2815	36.0666	363
chr12	123237048	123237921	Peak_524	402	.	6.67774	40.2573	36.0428	356
chr7	92218959	92219925	Peak_525	402	.	6.71437	40.2573	36.0428	617
chr17	59476238	59478733	Peak_526	402	.	2.26256	40.2489	36.0352	1536
chr20	56964138	56965178	Peak_527	402	.	3.98156	40.2242	36.0106	546
chr5	173043039	173044159	Peak_528	402	.	5.95767	40.2191	36.0055	644
chr15	67357142	67358515	Peak_529	401	.	8.27113	40.1991	35.9861	379
chr17	80605767	80606468	Peak_530	401	.	8.27113	40.1991	35.9861	385
chr7	6745702	6746752	Peak_531	401	.	6.1634	40.1609	35.9492	632
chr3	126193676	126194786	Peak_532	401	.	5.97105	40.126	35.9148	674
chr21	40684959	40686031	Peak_533	400	.	5.76191	40.0656	35.855	493
chr14	105260900	105261975	Peak_534	399	.	7.84636	39.9741	35.7641	664
chr15	48469755	48470877	Peak_535	399	.	9.69192	39.964	35.7539	471
chrX	53253759	53254656	Peak_536	399	.	9.76519	39.964	35.7539	537
chr2	70313243	70315157	Peak_537	399	.	8.2581	39.9516	35.7419	1555
chr20	30310549	30311581	Peak_538	399	.	6.75366	39.9387	35.7298	674
chr17	16118162	16119521	Peak_539	399	.	8.59709	39.9313	35.7225	976
chr11	35684102	35685046	Peak_540	399	.	10.1494	39.9123	35.704	470
chr3	57541677	57542827	Peak_541	399	.	10.1494	39.9123	35.704	483
chr2	85581684	85582467	Peak_542	398	.	7.39781	39.843	35.6359	293
chr6	17705858	17707417	Peak_543	398	.	7.30988	39.843	35.6359	561
chr6	39082397	39083250	Peak_544	398	.	7.30988	39.843	35.6359	321
chr8	99837237	99837973	Peak_545	398	.	7.35384	39.843	35.6359	386
chr18	158349	159183	Peak_546	398	.	8.9982	39.8149	35.6095	389
chr18	9102557	9103348	Peak_547	397	.	9.70052	39.7803	35.5761	340
chr19	30433037	30434014	Peak_548	397	.	9.12256	39.779	35.5752	526
chr16	74700177	74700997	Peak_549	396	.	7.18317	39.6523	35.4494	370
chr7	143598754	143599850	Peak_550	396	.	7.80065	39.6088	35.4063	339
chr14	50998340	50999693	Peak_551	395	.	6.92511	39.5581	35.3561	682
chr5	133339521	133341507	Peak_552	395	.	6.96508	39.5581	35.3561	602
chr11	74204080	74204890	Peak_553	393	.	6.6411	39.3947	35.195	400
chr2	74153767	74154571	Peak_554	393	.	6.60447	39.3947	35.195	445
chr12	104530947	104532436	Peak_555	393	.	8.72305	39.3329	35.1359	705
chr16	3450587	3451941	Peak_556	393	.	6.36697	39.328	35.132	848
chr2	24346169	24347117	Peak_557	393	.	6.33315	39.328	35.132	444
chr3	196014485	196015274	Peak_558	392	.	8.16391	39.2296	35.0355	434
chr7	74488847	74489691	Peak_559	389	.	7.92328	38.9331	34.7426	435
chr1	33721003	33723067	Peak_560	388	.	9.61865	38.8988	34.7099	420
chr8	21906111	21907075	Peak_561	388	.	9.61865	38.8988	34.7099	422
chr4	124082	125148	Peak_562	388	.	9.99116	38.822	34.6339	399
chr7	35734000	35734868	Peak_563	387	.	8.74698	38.7999	34.6129	422
chr9	102861035	102862281	Peak_564	387	.	7.05587	38.7536	34.5676	682
chr17	47438804	47439559	Peak_565	387	.	4.68045	38.747	34.5615	411
chr9	136242319	136243311	Peak_566	386	.	5.18932	38.688	34.503	530
chr9	123605020	123605829	Peak_567	386	.	6.88514	38.6764	34.4915	441
chr10	7829866	7831087	Peak_568	385	.	6.56783	38.5376	34.3552	480
chr11	75378271	75379312	Peak_569	384	.	6.26552	38.4925	34.3117	446
chr7	72992181	72993014	Peak_570	384	.	7.49804	38.4306	34.2514	520
chr16	3355032	3356060	Peak_571	382	.	7.94945	38.2666	34.0895	524
chr21	45758945	45759854	Peak_572	382	.	7.30924	38.2185	34.0423	346
chr7	55433345	55434628	Peak_573	381	.	6.48141	38.1169	33.9423	661
chr2	73495721	73497018	Peak_574	380	.	7.13403	38.0292	33.855	571
chr8	102449738	102451204	Peak_575	380	.	7.13403	38.0292	33.855	1133
chr3	149375745	149376609	Peak_576	379	.	5.58531	37.981	33.8093	475
chr19	11485100	11485822	Peak_577	378	.	6.76524	37.8005	33.6311	342
chr20	34251894	34252948	Peak_578	378	.	6.76524	37.8005	33.6311	573
chr5	141302703	141303854	Peak_579	378	.	6.76524	37.8005	33.6311	424
chr18	5237529	5238515	Peak_580	377	.	8.62138	37.792	33.6233	416
chr7	98476016	98477053	Peak_581	377	.	5.93357	37.773	33.6048	495
chr4	120987272	120988283	Peak_582	377	.	9.83292	37.7396	33.5718	440
chr3	127308669	127309706	Peak_583	377	.	5.97499	37.7118	33.5459	543
chr7	5085227	5086231	Peak_584	377	.	5.97499	37.7118	33.5459	471
chr4	89444035	89445437	Peak_585	376	.	6.49456	37.686	33.521	688
chr9	138371712	138372604	Peak_586	376	.	6.49456	37.686	33.521	332
chr17	80476941	80477594	Peak_587	374	.	7.53592	37.475	33.3139	322
chr18	11908147	11909345	Peak_588	374	.	7.53592	37.475	33.3139	540
chr5	114961122	114961858	Peak_589	374	.	9.05061	37.4657	33.3054	411
chr17	54910634	54912187	Peak_590	373	.	4.99986	37.3276	33.1681	1084
chr22	31742018	31743820	Peak_591	373	.	8.47607	37.3271	33.1676	1355
chr8	146277797	146278467	Peak_592	373	.	8.47607	37.3271	33.1676	305
chr17	5341920	5342626	Peak_593	373	.	7.89584	37.3102	33.1511	349
chr14	23790655	23791591	Peak_594	371	.	7.00214	37.1313	32.9747	364
chr14	24664422	24665479	Peak_595	371	.	7.09007	37.1313	32.9747	639
chr15	63449202	63450373	Peak_596	371	.	7.00214	37.1313	32.9747	684
chr16	25268654	25269913	Peak_597	371	.	7.09007	37.1313	32.9747	348
chr2	178076577	178078243	Peak_598	371	.	7.00214	37.1313	32.9747	1306
chr11	43333317	43334271	Peak_599	370	.	7.98333	37.0459	32.8912	474
chr14	53161726	53162789	Peak_600	370	.	7.61513	37.0429	32.8888	683
chr2	61404301	61405513	Peak_601	370	.	7.61513	37.0429	32.8888	489
chr2	131850258	131851338	Peak_602	369	.	8.18568	36.9658	32.8127	555
chr5	40834547	40835964	Peak_603	369	.	8.18568	36.9658	32.8127	1019
chr8	101732812	101734219	Peak_604	369	.	6.64052	36.9084	32.7573	421
chr3	184428607	184430091	Peak_605	369	.	5.91219	36.9057	32.7545	885
chr16	10837494	10838170	Peak_606	368	.	6.34802	36.84	32.6894	387
chr17	1587534	1588425	Peak_607	368	.	6.34802	36.84	32.6894	425
chr17	4046814	4047534	Peak_608	368	.	6.38465	36.84	32.6894	379
chr7	39989291	39991522	Peak_609	368	.	6.7369	36.8344	32.6855	341
chrX	153284341	153286044	Peak_610	367	.	8.55857	36.7912	32.643	1201
chr19	45003986	45004813	Peak_611	367	.	6.59737	36.7119	32.5655	422
chr7	90893421	90894628	Peak_612	367	.	6.59737	36.7119	32.5655	286
chr11	34937206	34938697	Peak_613	366	.	9.67467	36.6651	32.5193	508
chr1	160068190	160068904	Peak_614	366	.	9.59555	36.6651	32.5193	331
chrX	152863911	152864624	Peak_615	366	.	9.59555	36.6651	32.5193	371
chrX	153743989	153744851	Peak_616	366	.	9.59555	36.6651	32.5193	542
chr9	104160857	104161820	Peak_617	366	.	6.54347	36.6048	32.4609	468
chr22	29664159	29665397	Peak_618	365	.	7.34053	36.5512	32.408	519
chr2	64836119	64837033	Peak_619	365	.	7.34053	36.5512	32.408	405
chr17	79369938	79371543	Peak_620	363	.	6.1897	36.3639	32.2233	755
chr15	65902920	65903863	Peak_621	363	.	7.735	36.3605	32.2201	374
chr20	62669757	62670770	Peak_622	363	.	5.18315	36.3432	32.2032	390
chr12	32831980	32832988	Peak_623	363	.	8.29084	36.3349	32.195	528
chr1	52607461	52608603	Peak_624	363	.	8.35258	36.3349	32.195	808
chr5	108063307	108064338	Peak_625	363	.	8.35258	36.3349	32.195	598
chr2	32582185	32583252	Peak_626	362	.	6.91422	36.2396	32.1011	415
chr7	140372637	140373527	Peak_627	362	.	6.91422	36.2396	32.1011	431
chr8	67624335	67625362	Peak_628	361	.	8.8801	36.1399	32.003	571
chr12	46383483	46384405	Peak_629	361	.	5.78658	36.1048	31.9688	582
chr20	39631884	39632708	Peak_630	361	.	4.8859	36.1023	31.9671	410
chr10	51564934	51565939	Peak_631	360	.	7.76352	36.0908	31.9562	511
chr1	90460563	90461355	Peak_632	360	.	7.76352	36.0908	31.9562	466
chr4	24913839	24915038	Peak_633	360	.	7.76352	36.0908	31.9562	608
chr17	79829203	79830352	Peak_634	360	.	6.56541	36.0661	31.9325	485
chr10	5854460	5856475	Peak_635	360	.	6.0288	36.018	31.8853	1357
chr4	128981617	128983389	Peak_636	359	.	6.27475	35.9997	31.8676	514
chr16	28834212	28835423	Peak_637	359	.	6.69589	35.9638	31.833	750
chr17	55926900	55928269	Peak_638	359	.	5.25676	35.9149	31.7845	915
chr10	62538057	62539082	Peak_639	357	.	8.37016	35.7977	31.6683	411
chr1	225964921	225966092	Peak_640	357	.	8.37016	35.7977	31.6683	797
chr22	50220320	50221240	Peak_641	357	.	8.30736	35.7977	31.6683	506
chr14	35872826	35874133	Peak_642	357	.	6.38976	35.7533	31.625	730
chr14	73524947	73526044	Peak_643	357	.	6.38976	35.7533	31.625	486
chr20	277936	279042	Peak_644	357	.	9.10575	35.7491	31.6212	520
chr6	146864167	146865097	Peak_645	356	.	7.2138	35.6846	31.5577	480
chr6	111279201	111280369	Peak_646	356	.	7.24284	35.6338	31.5079	518
chr22	38901273	38902382	Peak_647	355	.	9.4373	35.5987	31.4734	497
chr3	131221147	131221995	Peak_648	355	.	8.61751	35.5611	31.4375	496
chr10	98346012	98347297	Peak_649	354	.	5.57666	35.4686	31.3457	505
chr2	242575569	242576854	Peak_650	354	.	5.54735	35.4686	31.3457	718
chr1	146714211	146715037	Peak_651	354	.	5.31593	35.4528	31.3302	448
chr14	75229794	75230705	Peak_652	354	.	8.06706	35.4084	31.2865	363
chr2	178416798	178417818	Peak_653	353	.	6.82629	35.3541	31.2325	583
chr20	49411645	49412355	Peak_654	352	.	2.30052	35.2863	31.1671	336
chr17	66243361	66244892	Peak_655	352	.	4.52407	35.242	31.1229	970
chr18	33709006	33709916	Peak_656	352	.	6.67395	35.2181	31.099	569
chr14	45553205	45553968	Peak_657	352	.	6.48548	35.2078	31.089	374
chr17	61677975	61679090	Peak_658	351	.	3.97532	35.1956	31.0785	398
chr13	22032569	22033443	Peak_659	351	.	7.4097	35.1791	31.0621	533
chr5	149865490	149866358	Peak_660	351	.	7.46106	35.1791	31.0621	541
chr4	1873100	1874114	Peak_661	351	.	7.70856	35.1427	31.0272	323
chr2	173940357	173941729	Peak_662	350	.	6.57286	35.0993	30.9852	629
chr2	19547102	19547981	Peak_663	350	.	7.95058	35.0238	30.9105	426
chr2	153573191	153574221	Peak_664	348	.	8.18175	34.8115	30.701	503
chr9	66458001	66458685	Peak_665	348	.	8.18175	34.8115	30.701	357
chr5	137910484	137911616	Peak_666	347	.	7.14514	34.7231	30.6146	407
chr8	28558415	28559692	Peak_667	347	.	6.04925	34.7175	30.6097	885
chr10	123686983	123688267	Peak_668	345	.	9.35818	34.5405	30.4354	886
chr1	10002897	10003773	Peak_669	345	.	9.35818	34.5405	30.4354	433
chr11	14520728	14522038	Peak_670	345	.	9.35818	34.5405	30.4354	480
chr17	36981335	36982211	Peak_671	345	.	9.19994	34.5405	30.4354	411
chr19	2236428	2237496	Peak_672	345	.	9.35818	34.5405	30.4354	586
chr3	150126171	150127251	Peak_673	345	.	5.66097	34.5191	30.416	601
chr16	67312751	67313573	Peak_674	345	.	8.08473	34.5032	30.4005	339
chr15	41135625	41136916	Peak_675	344	.	7.52055	34.4816	30.379	424
chr20	18118145	18119325	Peak_676	344	.	7.46694	34.4816	30.379	616
chr1	215740408	215741487	Peak_677	343	.	5.85971	34.3958	30.2949	420
chr6	30881887	30882703	Peak_678	343	.	8.1056	34.3725	30.2723	318
chr8	74888337	74889139	Peak_679	343	.	8.1056	34.3725	30.2723	343
chr14	68140876	68142041	Peak_680	343	.	6.44552	34.3556	30.256	646
chr15	91445470	91446788	Peak_681	343	.	6.09157	34.3362	30.2379	610
chr2	219433322	219434454	Peak_682	343	.	6.16484	34.3362	30.2379	591
chr7	102937688	102938464	Peak_683	342	.	7.5437	34.2015	30.1058	401
chr7	48018472	48019440	Peak_684	342	.	7.5437	34.2015	30.1058	530
chr9	96213231	96215259	Peak_685	341	.	5.28307	34.159	30.0643	1453
chr14	50359030	50360679	Peak_686	341	.	6.3593	34.1475	30.0532	456
chr16	23521205	23521905	Peak_687	341	.	6.31962	34.1475	30.0532	383
chr15	85197019	85197859	Peak_688	340	.	6.27447	34.0681	29.9747	433
chr8	118532845	118533600	Peak_689	340	.	7.77426	34.0636	29.9705	352
chr3	184032337	184033481	Peak_690	339	.	5.45942	33.9259	29.8346	381
chr3	33154955	33156238	Peak_691	339	.	5.45942	33.9259	29.8346	887
chr7	12250754	12251519	Peak_692	338	.	6.97693	33.8864	29.796	391
chr10	88280620	88282203	Peak_693	338	.	7.09629	33.819	29.7302	1255
chr10	43857663	43858357	Peak_694	337	.	7.58551	33.7918	29.7038	394
chr1	229693561	229694662	Peak_695	337	.	7.58551	33.7918	29.7038	455
chr7	127031650	127032582	Peak_696	337	.	7.64158	33.7918	29.7038	367
chr17	65989800	65990615	Peak_697	337	.	5.62957	33.7344	29.6474	354
chr12	72233144	72234189	Peak_698	336	.	6.6944	33.602	29.5167	652
chr22	50765344	50766205	Peak_699	335	.	8.7543	33.5258	29.4431	420
chr1	31537677	31538873	Peak_700	334	.	9.04169	33.4907	29.4098	616
chr19	23577396	23578598	Peak_701	334	.	9.04169	33.4907	29.4098	826
chr12	131356617	131357347	Peak_702	334	.	6.54665	33.4873	29.4076	371
chr2	180128663	180129569	Peak_703	334	.	6.50421	33.4873	29.4076	374
chr20	48807387	48808754	Peak_704	333	.	3.94991	33.3619	29.2838	893
chr7	33101690	33102979	Peak_705	332	.	4.91588	33.28	29.2026	919
chr19	8509707	8510702	Peak_706	332	.	7.37884	33.2675	29.1904	593
chr3	141205532	141206887	Peak_707	332	.	7.4338	33.2675	29.1904	435
chr14	69657936	69658824	Peak_708	331	.	5.34219	33.1624	29.0874	365
chr21	47742887	47743841	Peak_709	331	.	5.97526	33.13	29.0561	612
chr5	72860647	72861548	Peak_710	331	.	7.65672	33.1109	29.0375	541
chr8	94752418	94753272	Peak_711	330	.	5.77777	33.0678	28.9954	456
chr7	96338572	96339291	Peak_712	329	.	6.83481	32.9973	28.9253	384
chr20	48429288	48430018	Peak_713	329	.	5.53536	32.9551	28.8839	325
chr2	62732475	62733645	Peak_714	329	.	5.53536	32.9551	28.8839	501
chr3	15900272	15901012	Peak_715	329	.	5.56676	32.9551	28.8839	319
chr20	32699413	32700188	Peak_716	329	.	6.94975	32.9218	28.8513	360
chr3	193310691	193311741	Peak_717	329	.	6.9986	32.9218	28.8513	467
chr12	133337803	133339207	Peak_718	328	.	7.86773	32.862	28.7932	1099
chrX	128673913	128674737	Peak_719	328	.	7.99334	32.862	28.7932	335
chr16	71929313	71930218	Peak_720	328	.	6.67077	32.857	28.7893	485
chr2	133104746	133105526	Peak_721	327	.	5.75826	32.7961	28.7292	339
chr2	198380640	198381399	Peak_722	326	.	5.98166	32.6962	28.6311	376
chr14	45603007	45603769	Peak_723	326	.	6.24569	32.6696	28.6058	372
chr11	118780757	118781756	Peak_724	326	.	6.41934	32.6315	28.5688	381
chr16	71756925	71758061	Peak_725	326	.	6.41934	32.6315	28.5688	534
chr7	107384072	107385194	Peak_726	326	.	4.60014	32.6021	28.5404	715
chr2	220435102	220436457	Peak_727	325	.	6.3268	32.5428	28.4814	853
chr3	39448153	39448770	Peak_728	324	.	6.20059	32.4684	28.4081	322
chr9	127177185	127177845	Peak_729	324	.	6.20059	32.4684	28.4081	336
chr6	160147709	160149284	Peak_730	324	.	8.88345	32.4495	28.3896	1119
chr3	127391071	127391861	Peak_731	324	.	6.0439	32.407	28.3493	388
chr6	150184470	150185651	Peak_732	323	.	5.97128	32.3576	28.3006	484
chr5	170288876	170289716	Peak_733	322	.	5.67537	32.2723	28.2171	314
chr16	89283447	89284689	Peak_734	322	.	5.48824	32.2661	28.2109	474
chr14	95235741	95236973	Peak_735	322	.	4.99816	32.2327	28.178	397
chr17	66507481	66508292	Peak_736	321	.	5.47412	32.1899	28.1358	377
chr2	240322817	240324118	Peak_737	321	.	5.44116	32.1815	28.1274	490
chr6	146135249	146136211	Peak_738	321	.	5.44116	32.1815	28.1274	442
chr19	48996794	48997585	Peak_739	321	.	7.53917	32.1656	28.112	269
chr12	133613871	133614755	Peak_740	321	.	8.19318	32.1208	28.0676	461
chr2	166809779	166810682	Peak_741	321	.	8.19318	32.1208	28.0676	353
chr4	16227416	16228912	Peak_742	321	.	8.19318	32.1208	28.0676	480
chr6	42858041	42858682	Peak_743	321	.	8.26187	32.1208	28.0676	313
chr14	23775731	23776627	Peak_744	321	.	6.74006	32.1149	28.0622	492
chr8	67837089	67837969	Peak_745	321	.	6.69269	32.1149	28.0622	455
chr3	196466546	196467624	Peak_746	320	.	6.80321	32.0315	27.9798	501
chr5	180669923	180670969	Peak_747	320	.	6.80321	32.0315	27.9798	540
chr14	92505789	92506747	Peak_748	319	.	5.09073	31.9267	27.8774	411
chr1	38259237	38260225	Peak_749	318	.	7.74212	31.8989	27.8504	409
chr1	157014950	157016182	Peak_750	318	.	5.87175	31.8852	27.8376	536
chr2	135676260	135677202	Peak_751	318	.	5.87175	31.8852	27.8376	394
chr10	43277654	43278429	Peak_752	318	.	6.43063	31.876	27.8294	330
chr16	89939187	89940043	Peak_753	318	.	4.81818	31.8546	27.8091	424
chr16	67225870	67226681	Peak_754	318	.	6.16575	31.836	27.7909	379
chr18	12376606	12377388	Peak_755	318	.	6.12579	31.836	27.7909	407
chr3	100053512	100054272	Peak_756	318	.	6.16575	31.836	27.7909	297
chr6	143832251	143833053	Peak_757	317	.	7.14526	31.7164	27.6728	390
chr16	88850862	88852242	Peak_758	317	.	6.16276	31.7033	27.6601	631
chr12	111051775	111052416	Peak_759	316	.	8.37304	31.6613	27.6187	293
chr15	65476707	65477968	Peak_760	316	.	5.22496	31.6517	27.6093	797
chr15	83875480	83876830	Peak_761	315	.	5.85951	31.5449	27.5039	601
chr1	151137800	151138680	Peak_762	315	.	4.68028	31.5238	27.4837	450
chr9	126691577	126692541	Peak_763	315	.	4.68028	31.5238	27.4837	605
chr1	149982082	149982993	Peak_764	315	.	5.35027	31.5156	27.4757	412
chr19	54618525	54619221	Peak_765	314	.	7.61164	31.4855	27.4466	412
chr2	171785380	171786482	Peak_766	314	.	7.61164	31.4855	27.4466	609
chr14	24898723	24899800	Peak_767	314	.	5.50421	31.4846	27.446	491
chr16	67596474	67597363	Peak_768	314	.	5.55426	31.4797	27.4413	409
chr4	2469982	2471873	Peak_769	314	.	7.15903	31.4215	27.3833	1038
chr1	62901349	62902108	Peak_770	314	.	8.80432	31.4171	27.3798	409
chr4	22517061	22517877	Peak_771	314	.	8.7252	31.4171	27.3798	376
chrX	57618360	57619314	Peak_772	314	.	8.7252	31.4171	27.3798	535
chr17	78428074	78429275	Peak_773	314	.	5.40976	31.4135	27.3779	349
chr15	41709179	41710299	Peak_774	312	.	7.4804	31.228	27.1942	494
chr14	92979561	92980542	Peak_775	312	.	5.58917	31.2197	27.1868	520
chr16	2255057	2255938	Peak_776	312	.	5.55535	31.2197	27.1868	562
chr20	61568659	61570111	Peak_777	312	.	4.78869	31.2174	27.1851	1015
chr3	196594227	196595479	Peak_778	311	.	5.03578	31.1932	27.1609	754
chr12	54718761	54719461	Peak_779	311	.	6.75436	31.1482	27.1166	341
chr15	80188359	80189786	Peak_780	310	.	5.79848	31.0804	27.0511	1093
chr20	25604529	25605525	Peak_781	310	.	5.76185	31.0804	27.0511	506
chr3	47822796	47824099	Peak_782	310	.	5.79848	31.0804	27.0511	940
chr2	177133959	177134734	Peak_783	310	.	6.38666	31.023	26.9945	272
chr7	43798059	43798967	Peak_784	310	.	6.38666	31.023	26.9945	466
chrX	118708569	118709401	Peak_785	310	.	7.19298	31.0039	26.9776	508
chr17	46125098	46126325	Peak_786	309	.	4.38108	30.9811	26.9551	811
chr2	136742468	136743704	Peak_787	309	.	7.61651	30.9436	26.9178	452
chr8	99057070	99057891	Peak_788	309	.	6.2496	30.9394	26.9142	486
chr12	13153868	13154616	Peak_789	309	.	8.39491	30.9229	26.8981	385
chr15	76603222	76604041	Peak_790	309	.	5.13703	30.9045	26.8799	368
chr2	191399005	191399983	Peak_791	308	.	6.12175	30.8704	26.8463	647
chr1	201436793	201438729	Peak_792	308	.	4.61087	30.8333	26.8097	1093
chr12	107167815	107168582	Peak_793	308	.	7.75686	30.8164	26.793	467
chr4	668266	669127	Peak_794	308	.	7.03803	30.8093	26.787	400
chr12	76477658	76478955	Peak_795	307	.	5.89018	30.7708	26.7493	491
chr8	95731651	95732569	Peak_796	307	.	5.78499	30.7383	26.7172	472
chr5	81267609	81268631	Peak_797	306	.	8.29976	30.6604	26.6406	480
chr14	24422510	24423460	Peak_798	306	.	6.84476	30.6408	26.6219	528
chr22	20067265	20068848	Peak_799	305	.	7.10408	30.5097	26.4919	623
chr19	48901522	48902155	Peak_800	304	.	6.71637	30.4955	26.4789	312
chr12	93322044	93323177	Peak_801	304	.	5.52153	30.4404	26.4249	700
chr16	84149744	84151125	Peak_802	304	.	5.48772	30.4404	26.4249	630
chr2	98611531	98612932	Peak_803	304	.	5.48772	30.4404	26.4249	849
chr9	140099686	140100689	Peak_804	304	.	5.48772	30.4404	26.4249	541
chr15	49447055	49448012	Peak_805	303	.	8.56696	30.3935	26.3788	403
chr17	43024490	43025245	Peak_806	303	.	8.56696	30.3935	26.3788	356
chrX	56589714	56590718	Peak_807	303	.	8.56696	30.3935	26.3788	415
chr14	39735292	39736750	Peak_808	303	.	6.55057	30.3711	26.3579	689
chr14	50052541	50053165	Peak_809	302	.	7.2453	30.2982	26.2857	335
chr12	118573062	118574819	Peak_810	302	.	6.65667	30.2721	26.2608	1171
chr12	112856592	112857304	Peak_811	301	.	5.96592	30.1881	26.1788	326
chr6	4018282	4019172	Peak_812	301	.	5.96592	30.1881	26.1788	517
chr12	44229351	44230316	Peak_813	301	.	6.29874	30.1767	26.1681	587
chr16	70322761	70323593	Peak_814	301	.	6.29874	30.1767	26.1681	389
chr20	42086512	42087171	Peak_815	301	.	6.29874	30.1767	26.1681	351
chr3	121264063	121264905	Peak_816	301	.	6.29874	30.1767	26.1681	494
chr5	87969887	87971276	Peak_817	301	.	6.21081	30.1767	26.1681	885
chr1	67518909	67520086	Peak_818	300	.	7.08083	30.0897	26.0844	709
chr7	152372641	152373332	Peak_819	300	.	7.13691	30.0897	26.0844	351
chr19	50353962	50354588	Peak_820	299	.	5.88317	29.9973	25.9936	336
chr9	38620599	38622120	Peak_821	299	.	7.55371	29.9965	25.9932	371
chr16	85832592	85834098	Peak_822	299	.	5.29929	29.9752	25.9726	865
chr21	40720372	40721085	Peak_823	299	.	5.2363	29.9752	25.9726	387
chr17	58155781	58156387	Peak_824	299	.	2.39117	29.9664	25.964	315
chr9	130547873	130548961	Peak_825	299	.	5.42144	29.9323	25.9306	759
chr3	49966961	49967660	Peak_826	299	.	6.87719	29.9097	25.9088	314
chr9	129088670	129089835	Peak_827	298	.	5.22134	29.8946	25.8944	705
chr20	61436062	61437446	Peak_828	298	.	4.64343	29.8897	25.8902	749
chr13	51483642	51485106	Peak_829	298	.	7.62679	29.8598	25.8604	835
chr9	36487154	36487893	Peak_830	297	.	6.74204	29.7548	25.7564	391
chr16	57278936	57279692	Peak_831	296	.	8.15322	29.6682	25.6707	345
chr17	66508624	66509647	Peak_832	296	.	3.97906	29.6334	25.6377	347
chr16	3184132	3185076	Peak_833	296	.	6.56851	29.6223	25.6266	520
chr12	6450124	6451429	Peak_834	296	.	6.99417	29.6055	25.6102	740
chr12	861687	862756	Peak_835	296	.	6.99417	29.6055	25.6102	449
chr3	57261666	57262439	Peak_836	295	.	8.02644	29.5191	25.5262	436
chr4	2844887	2846245	Peak_837	295	.	6.40845	29.5099	25.5175	815
chr14	102552637	102553420	Peak_838	294	.	5.65194	29.4895	25.4977	423
chr5	170814872	170815824	Peak_839	294	.	5.6153	29.4895	25.4977	477
chr16	84733152	84734249	Peak_840	294	.	4.49518	29.4673	25.4764	722
chr16	3550825	3551463	Peak_841	294	.	6.51013	29.4032	25.4133	359
chr16	30582182	30583391	Peak_842	293	.	7.12775	29.3763	25.3887	619
chr14	35008435	35009094	Peak_843	293	.	5.88599	29.374	25.387	308
chr19	58739978	58740855	Peak_844	293	.	5.88599	29.374	25.387	419
chr2	20646631	20648137	Peak_845	293	.	5.88599	29.374	25.387	323
chr5	149828401	149829887	Peak_846	293	.	6.16685	29.3374	25.3512	814
chr7	148787343	148788743	Peak_847	293	.	6.12289	29.3374	25.3512	741
chr7	156930816	156932517	Peak_848	293	.	6.16685	29.3374	25.3512	348
chr10	70090947	70092941	Peak_849	293	.	8.385	29.3169	25.332	1490
chr10	103825014	103825958	Peak_850	292	.	6.07986	29.2741	25.2893	414
chr3	14219550	14220720	Peak_851	292	.	4.35834	29.2186	25.2349	337
chr17	80023105	80024019	Peak_852	291	.	6.96868	29.1833	25.2006	534
chr14	104094415	104095536	Peak_853	291	.	5.73646	29.1603	25.1781	778
chr8	143807566	143808497	Peak_854	291	.	5.40231	29.1499	25.168	436
chr12	54068994	54070049	Peak_855	291	.	5.59871	29.1442	25.1624	705
chr16	67562387	67563476	Peak_856	291	.	5.15854	29.144	25.1624	719
chr20	17948816	17949660	Peak_857	291	.	5.57757	29.1375	25.1568	525
chr3	37284163	37285269	Peak_858	291	.	7.95695	29.1229	25.1424	574
chr19	4083849	4084571	Peak_859	290	.	7.3653	29.0576	25.0775	391
chr17	15902560	15903898	Peak_860	290	.	4.81597	29.0249	25.0459	686
chr2	86849833	86851439	Peak_861	290	.	4.87092	29.0249	25.0459	754
chr18	29671507	29673436	Peak_862	289	.	7.49672	28.9116	24.9339	1479
chr1	19923314	19924300	Peak_863	288	.	8.14816	28.8963	24.9197	438
chr17	65821486	65822410	Peak_864	288	.	4.19351	28.8771	24.9006	355
chr1	247494548	247495962	Peak_865	287	.	8.17376	28.7585	24.783	639
chr2	152145773	152146501	Peak_866	287	.	6.42066	28.7564	24.781	358
chr15	73976300	73977500	Peak_867	287	.	6.82931	28.7091	24.734	561
chr11	62493731	62495552	Peak_868	287	.	5.54203	28.7035	24.7295	796
chr3	19988699	19989807	Peak_869	287	.	5.5054	28.7035	24.7295	573
chr3	107149894	107150953	Peak_870	286	.	4.99049	28.6968	24.7238	433
chr11	129871502	129872565	Peak_871	286	.	7.86014	28.6849	24.7124	517
chr16	87984248	87985807	Peak_872	286	.	4.68784	28.6783	24.7062	1051
chr10	112679251	112680137	Peak_873	286	.	7.30291	28.67	24.698	330
chr14	23503295	23504200	Peak_874	286	.	6.26632	28.6559	24.6848	583
chr2	44395985	44396921	Peak_875	286	.	6.26632	28.6559	24.6848	421
chr2	201374341	201375001	Peak_876	285	.	6.12352	28.5727	24.6022	311
chr8	94712700	94713544	Peak_877	285	.	5.80606	28.5666	24.5967	336
chr12	32112110	32113078	Peak_878	285	.	6.36358	28.5417	24.5727	432
chr17	39967255	39968325	Peak_879	285	.	6.36358	28.5417	24.5727	677
chr11	13690212	13690929	Peak_880	285	.	7.80808	28.5392	24.5712	396
chr1	219347072	219347828	Peak_881	285	.	6.07893	28.5051	24.5376	344
chr16	401877	402795	Peak_882	285	.	6.03496	28.5051	24.5376	364
chr8	11141773	11142660	Peak_883	285	.	6.07893	28.5051	24.5376	359
chr7	107531472	107532265	Peak_884	284	.	5.11034	28.4773	24.5111	412
chr2	38829118	38830052	Peak_885	284	.	5.91012	28.4518	24.4863	380
chr3	13520777	13521607	Peak_886	284	.	5.14863	28.44	24.4748	411
chr14	104387244	104387985	Peak_887	284	.	5.79367	28.4114	24.4464	391
chr12	53894757	53895443	Peak_888	284	.	5.25542	28.409	24.4444	345
chr21	47705569	47706354	Peak_889	283	.	4.5251	28.3793	24.4157	384
chr14	38063499	38064425	Peak_890	283	.	4.63333	28.3376	24.376	458
chr12	42631187	42632686	Peak_891	282	.	6.80046	28.2849	24.3238	374
chr17	4692928	4693966	Peak_892	282	.	6.80046	28.2849	24.3238	472
chr4	1241300	1243707	Peak_893	282	.	7.7161	28.2802	24.3196	947
chr19	19430762	19432530	Peak_894	281	.	5.28481	28.139	24.1792	996
chr1	109505525	109506268	Peak_895	281	.	6.66274	28.1335	24.1744	341
chr20	33412655	33413758	Peak_896	281	.	7.17689	28.1271	24.1684	636
chr3	196669012	196670327	Peak_897	280	.	6.48525	28.0054	24.0479	731
chr2	20101007	20102026	Peak_898	279	.	7.30162	27.9719	24.0157	535
chr16	89159985	89160835	Peak_899	279	.	5.43213	27.9241	23.9686	434
chr9	139333309	139334410	Peak_900	279	.	5.46876	27.9241	23.9686	710
chr10	89577289	89578158	Peak_901	278	.	6.66445	27.8207	23.8669	406
chr1	179198177	179198904	Peak_902	278	.	6.7194	27.8207	23.8669	394
chr1	6258939	6259835	Peak_903	278	.	6.7194	27.8207	23.8669	541
chr18	9334649	9335488	Peak_904	278	.	6.66445	27.8207	23.8669	410
chr22	31795239	31796275	Peak_905	278	.	6.7194	27.8207	23.8669	525
chr3	81810174	81811037	Peak_906	278	.	6.17158	27.8093	23.8565	487
chr19	49588347	49589232	Peak_907	277	.	5.68616	27.766	23.8137	497
chr7	765817	767092	Peak_908	277	.	5.64619	27.766	23.8137	816
chr11	86510940	86511737	Peak_909	276	.	5.90308	27.68	23.7316	362
chr14	58711445	58712152	Peak_910	276	.	5.90308	27.68	23.7316	331
chr17	80693008	80693935	Peak_911	276	.	5.991	27.68	23.7316	338
chr2	27434571	27435780	Peak_912	276	.	5.991	27.68	23.7316	666
chr8	38239062	38239901	Peak_913	276	.	5.991	27.68	23.7316	487
chr8	61429654	61430430	Peak_914	276	.	5.94704	27.68	23.7316	351
chr1	116184309	116185358	Peak_915	276	.	5.00153	27.6607	23.714	347
chr11	77790409	77791239	Peak_916	276	.	5.06433	27.6607	23.714	442
chr3	194991175	194992086	Peak_917	276	.	5.06433	27.6607	23.714	437
chr6	43138936	43139883	Peak_918	276	.	5.06433	27.6607	23.714	385
chr9	131266878	131267649	Peak_919	276	.	5.06433	27.6607	23.714	314
chr14	58862593	58863446	Peak_920	276	.	5.31185	27.6014	23.6567	408
chr7	7606166	7607185	Peak_921	275	.	5.64511	27.5855	23.6412	513
chr1	166808074	166808982	Peak_922	275	.	7.7353	27.5685	23.6252	518
chr14	89290833	89291576	Peak_923	275	.	6.95143	27.5569	23.614	412
chr6	170893295	170893993	Peak_924	275	.	6.89266	27.5569	23.614	216
chr6	125622441	125623324	Peak_925	274	.	7.68947	27.4415	23.4999	464
chr8	91013060	91014128	Peak_926	274	.	3.98101	27.4067	23.4652	531
chr15	93425997	93426864	Peak_927	273	.	5.18336	27.3843	23.4432	291
chr1	201951644	201952593	Peak_928	273	.	8.09222	27.3783	23.4379	519
chr14	100680070	100681284	Peak_929	272	.	4.53267	27.294	23.3557	553
chr2	97523183	97523843	Peak_930	272	.	4.53267	27.294	23.3557	356
chr10	71905261	71906522	Peak_931	272	.	7.43757	27.2837	23.3457	666
chr17	61818516	61819433	Peak_932	272	.	4.20447	27.2472	23.3104	414
chr1	53191915	53192620	Peak_933	272	.	7.05128	27.2051	23.2685	358
chr21	38361926	38363034	Peak_934	272	.	7.05128	27.2051	23.2685	717
chr17	17584549	17586468	Peak_935	271	.	5.35886	27.1513	23.2155	453
chr9	99329093	99329921	Peak_936	271	.	5.35886	27.1513	23.2155	389
chr17	4268680	4270021	Peak_937	270	.	6.2728	27.0474	23.1134	722
chr2	179315347	179316674	Peak_938	270	.	6.17423	27.0474	23.1134	845
chr3	130612252	130612960	Peak_939	270	.	6.2728	27.0474	23.1134	299
chr14	91975785	91977723	Peak_940	270	.	4.4274	27.0258	23.0931	1310
chr9	127630781	127632532	Peak_941	269	.	5.05166	26.9541	23.023	1020
chr10	135186654	135187379	Peak_942	269	.	6.6095	26.9403	23.0093	399
chr4	56262005	56263020	Peak_943	269	.	6.6095	26.9403	23.0093	448
chr4	699510	700175	Peak_944	269	.	6.55454	26.9403	23.0093	307
chr1	107599230	107600359	Peak_945	269	.	3.07776	26.925	22.9955	405
chr19	39935408	39936539	Peak_946	269	.	7.83857	26.9187	22.9893	568
chr9	114936945	114937891	Peak_947	269	.	4.04206	26.9168	22.9876	408
chr6	138725317	138725887	Peak_948	269	.	5.98671	26.9089	22.9799	292
chr6	109415678	109416909	Peak_949	268	.	5.81515	26.8621	22.934	294
chr13	41768141	41768894	Peak_950	268	.	6.16819	26.8413	22.9147	454
chr14	36789108	36789982	Peak_951	268	.	6.16819	26.8413	22.9147	561
chr2	203735696	203736819	Peak_952	268	.	6.21704	26.8413	22.9147	400
chr3	88198506	88199624	Peak_953	268	.	6.16819	26.8413	22.9147	631
chr7	76008820	76009791	Peak_954	268	.	6.21704	26.8413	22.9147	387
chr1	70671027	70671877	Peak_955	268	.	6.93244	26.8346	22.9095	491
chr2	178482985	178483749	Peak_956	268	.	6.99418	26.8346	22.9095	341
chr8	146052124	146053658	Peak_957	268	.	5.67064	26.8064	22.8824	1179
chr1	109791857	109793074	Peak_958	268	.	5.37517	26.8019	22.8783	598
chr17	49337700	49338631	Peak_959	267	.	4.31007	26.7962	22.8727	507
chr16	30886134	30887198	Peak_960	267	.	5.46746	26.7941	22.8712	631
chr17	6543068	6544371	Peak_961	267	.	5.42903	26.7941	22.8712	643
chr3	126373276	126374046	Peak_962	267	.	5.50589	26.7941	22.8712	446
chr10	91174271	91175260	Peak_963	267	.	7.64032	26.7458	22.8233	570
chr2	174830104	174830778	Peak_964	267	.	6.89756	26.7251	22.803	335
chr3	14165765	14167002	Peak_965	266	.	5.08191	26.636	22.7146	357
chr14	102786043	102786883	Peak_966	266	.	4.50681	26.6102	22.6898	353
chr2	37423530	37424308	Peak_967	266	.	4.50681	26.6102	22.6898	375
chr19	34919138	34920018	Peak_968	266	.	7.51694	26.607	22.6869	422
chr7	27169505	27170973	Peak_969	266	.	7.58973	26.607	22.6869	500
chr9	26956126	26957037	Peak_970	266	.	7.58973	26.607	22.6869	404
chr1	154579820	154580820	Peak_971	265	.	6.52008	26.5123	22.5931	646
chr22	20861663	20862424	Peak_972	265	.	6.57616	26.5123	22.5931	286
chr3	154041752	154042510	Peak_973	265	.	6.63223	26.5123	22.5931	279
chr6	89855629	89856520	Peak_974	265	.	6.52008	26.5123	22.5931	453
chr5	81047039	81048200	Peak_975	264	.	7.54476	26.4832	22.5647	621
chr17	61627075	61628850	Peak_976	264	.	4.16583	26.483	22.5645	1048
chr16	75681204	75682357	Peak_977	264	.	4.76985	26.4009	22.4827	815
chr10	97889328	97890520	Peak_978	263	.	7.85485	26.3923	22.4742	415
chr11	9482471	9483389	Peak_979	263	.	7.77573	26.3923	22.4742	400
chr6	100015826	100016921	Peak_980	263	.	7.85485	26.3923	22.4742	585
chr7	23221341	23222243	Peak_981	263	.	6.39468	26.3891	22.4722	566
chr4	69214934	69216131	Peak_982	263	.	7.30019	26.3428	22.4275	626
chr9	37800430	37801655	Peak_983	263	.	7.2315	26.3428	22.4275	664
chr10	112064018	112064815	Peak_984	262	.	6.98848	26.2919	22.3771	335
chr10	115613888	115615136	Peak_985	262	.	6.98848	26.2919	22.3771	785
chr8	9413346	9414116	Peak_986	262	.	6.92567	26.2919	22.3771	268
chr9	91925005	91925742	Peak_987	262	.	6.22846	26.2872	22.3735	382
chr7	149321258	149322055	Peak_988	262	.	6.07566	26.2045	22.2919	339
chr9	86321994	86323441	Peak_989	262	.	6.12494	26.2045	22.2919	529
chr1	156697969	156698739	Peak_990	262	.	4.90732	26.2018	22.2899	498
chr17	1012281	1013217	Peak_991	262	.	4.90732	26.2018	22.2899	466
chr8	144680097	144680953	Peak_992	262	.	4.90732	26.2018	22.2899	339
chr2	37383367	37384514	Peak_993	261	.	5.93471	26.1387	22.2285	539
chr6	170615209	170616259	Peak_994	261	.	6.02946	26.1387	22.2285	706
chr17	4843257	4843928	Peak_995	261	.	7.04149	26.119	22.2095	333
chr20	33104056	33104720	Peak_996	261	.	6.97645	26.119	22.2095	354
chr3	36985517	36986526	Peak_997	260	.	5.8499	26.0882	22.1794	411
chr2	220252060	220252794	Peak_998	260	.	6.44464	26.0681	22.1597	414
chr4	17811644	17813161	Peak_999	260	.	6.49959	26.0681	22.1597	632
chr12	120972025	120973103	Peak_1000	260	.	5.77119	26.0516	22.1449	359
chr2	38603349	38604412	Peak_1001	260	.	5.72722	26.0516	22.1449	569
chr12	133532493	133533148	Peak_1002	260	.	5.54761	26.0145	22.1101	326
chr3	134092104	134093635	Peak_1003	260	.	5.48639	26.012	22.1081	1122
chr15	65578434	65579447	Peak_1004	260	.	6.0705	26.0028	22.0991	473
chr2	148777744	148778420	Peak_1005	260	.	6.0705	26.0028	22.0991	345
chr10	64563702	64565536	Peak_1006	259	.	7.68377	25.9444	22.0419	485
chr1	100503527	100504508	Peak_1007	259	.	7.68377	25.9444	22.0419	624
chr4	24585400	24586591	Peak_1008	259	.	7.60637	25.9444	22.0419	369
chr11	73693834	73694988	Peak_1009	259	.	6.30978	25.9079	22.0067	815
chr10	123734117	123735071	Peak_1010	258	.	4.6974	25.8345	21.9341	514
chr17	62657691	62658560	Peak_1011	258	.	4.00426	25.8037	21.904	545
chr1	167904992	167906352	Peak_1012	257	.	7.42051	25.7904	21.8907	741
chr15	40330778	40331655	Peak_1013	257	.	7.49378	25.7904	21.8907	545
chr17	19770281	19771631	Peak_1014	256	.	4.28086	25.694	21.7957	717
chr1	27216058	27217012	Peak_1015	256	.	7.37137	25.6551	21.7571	493
chr7	139025741	139026620	Peak_1016	256	.	7.44415	25.6551	21.7571	560
chr13	111357862	111358613	Peak_1017	256	.	6.46401	25.6385	21.7411	452
chr13	21476456	21477362	Peak_1018	256	.	6.46401	25.6385	21.7411	553
chr15	90808389	90809502	Peak_1019	256	.	5.21231	25.6257	21.7287	718
chr18	19192129	19192857	Peak_1020	256	.	5.21231	25.6257	21.7287	355
chr5	177631480	177632520	Peak_1021	256	.	4.76696	25.6202	21.7242	749
chr20	13765587	13766472	Peak_1022	255	.	6.23384	25.5291	21.6336	506
chr6	42750478	42751793	Peak_1023	255	.	6.28745	25.5291	21.6336	530
chr1	150039073	150040391	Peak_1024	254	.	4.92236	25.4934	21.5989	640
chr1	151371888	151372714	Peak_1025	254	.	4.92236	25.4934	21.5989	350
chr7	2394198	2395160	Peak_1026	254	.	4.17124	25.4921	21.5979	508
chr10	976785	978712	Peak_1027	254	.	4.92338	25.4375	21.5443	471
chr11	809075	809814	Peak_1028	254	.	7.61749	25.4163	21.5232	419
chr13	96328795	96330039	Peak_1029	254	.	7.69661	25.4163	21.5232	839
chr19	21105826	21106579	Peak_1030	254	.	7.61749	25.4163	21.5232	304
chr4	71704522	71705725	Peak_1031	254	.	7.61749	25.4163	21.5232	783
chr9	19048843	19049979	Peak_1032	254	.	7.61749	25.4163	21.5232	749
chr15	50715969	50717093	Peak_1033	254	.	3.71528	25.4093	21.5177	400
chr16	30816573	30817575	Peak_1034	254	.	5.36643	25.4061	21.5145	446
chr20	35490615	35492544	Peak_1035	254	.	5.44636	25.4061	21.5145	1113
chr2	11886680	11887724	Peak_1036	254	.	5.44636	25.4061	21.5145	368
chr9	90340921	90341652	Peak_1037	254	.	5.44636	25.4061	21.5145	435
chr10	93169261	93170685	Peak_1038	253	.	6.80006	25.3875	21.497	461
chr1	36106611	36107312	Peak_1039	253	.	6.73726	25.3875	21.497	354
chr5	162886546	162887394	Peak_1040	253	.	6.73726	25.3875	21.497	496
chr6	127587776	127589007	Peak_1041	253	.	6.73726	25.3875	21.497	504
chr8	17779752	17781487	Peak_1042	253	.	6.80006	25.3875	21.497	400
chr2	71128067	71129184	Peak_1043	253	.	5.97709	25.3695	21.4797	478
chr7	149156811	149157890	Peak_1044	253	.	5.97709	25.3695	21.4797	275
chr1	150551270	150552672	Peak_1045	253	.	4.48012	25.3254	21.4364	627
chr9	86570933	86571903	Peak_1046	253	.	5.88734	25.315	21.4262	550
chr12	112563382	112564187	Peak_1047	252	.	5.71308	25.2752	21.3872	338
chr19	14628537	14629358	Peak_1048	252	.	5.75869	25.2752	21.3872	468
chr16	30596451	30597432	Peak_1049	252	.	5.31375	25.2509	21.3641	417
chr17	5094588	5095318	Peak_1050	252	.	5.68326	25.2486	21.3619	380
chr2	131100370	131100964	Peak_1051	252	.	5.68326	25.2486	21.3619	322
chr2	25193817	25195793	Peak_1052	252	.	5.6393	25.2486	21.3619	1269
chr2	30369667	30370819	Peak_1053	252	.	5.6393	25.2486	21.3619	498
chr6	28109406	28110146	Peak_1054	252	.	5.6393	25.2486	21.3619	394
chr16	12008816	12009717	Peak_1055	252	.	5.52821	25.2338	21.349	490
chr3	138553143	138554442	Peak_1056	252	.	6.91142	25.2061	21.3219	479
chr14	37666536	37667419	Peak_1057	252	.	6.33473	25.2043	21.3204	451
chr6	126277652	126278755	Peak_1058	252	.	6.33473	25.2043	21.3204	464
chr15	40226142	40226828	Peak_1059	251	.	5.9728	25.1721	21.2895	336
chr8	144766219	144766851	Peak_1060	251	.	5.92396	25.1721	21.2895	343
chr14	97263546	97264469	Peak_1061	251	.	4.98045	25.159	21.2776	448
chr22	29168482	29169268	Peak_1062	251	.	4.98045	25.159	21.2776	395
chr2	73461267	73461966	Peak_1063	251	.	4.94664	25.159	21.2776	381
chr20	55926208	55926831	Peak_1064	250	.	3.94836	25.0897	21.2095	294
chr20	47894581	47895930	Peak_1065	250	.	4.23201	25.0364	21.1564	399
chr3	63897685	63898642	Peak_1066	250	.	2.72299	25.0311	21.1518	304
chr3	120067342	120068326	Peak_1067	249	.	4.65006	24.9861	21.1069	529
chr20	47804230	47804901	Peak_1068	249	.	4.32661	24.9457	21.0669	385
chr1	41706994	41708547	Peak_1069	248	.	6.42247	24.8911	21.0125	609
chr14	57856792	57858322	Peak_1070	248	.	5.13904	24.8733	20.9953	901
chr3	122513854	122514647	Peak_1071	248	.	5.13904	24.8733	20.9953	321
chr7	32981959	32982917	Peak_1072	248	.	4.12497	24.8482	20.971	507
chr1	26437346	26438970	Peak_1073	248	.	7.27397	24.8447	20.9676	537
chr12	8184969	8185736	Peak_1074	248	.	7.2007	24.8447	20.9676	418
chr19	1438290	1439071	Peak_1075	248	.	7.27397	24.8447	20.9676	267
chr8	97273358	97273964	Peak_1076	247	.	4.82538	24.7727	20.8969	285
chr3	10362346	10363050	Peak_1077	247	.	4.78172	24.7681	20.8925	278
chr5	54602744	54603752	Peak_1078	247	.	4.71891	24.7681	20.8925	541
chr6	150038443	150039640	Peak_1079	247	.	4.71891	24.7681	20.8925	654
chr8	98289447	98290266	Peak_1080	247	.	4.89017	24.7109	20.8365	320
chr16	69220922	69221895	Peak_1081	246	.	6.12661	24.6775	20.8034	491
chr7	138719979	138721101	Peak_1082	246	.	6.12661	24.6775	20.8034	627
chr10	103815416	103816409	Peak_1083	246	.	5.2865	24.6337	20.7602	547
chr4	39459784	39460762	Peak_1084	246	.	5.2865	24.6337	20.7602	566
chr7	75677122	75677992	Peak_1085	246	.	5.2865	24.6337	20.7602	458
chr9	140483753	140485629	Peak_1086	246	.	5.32647	24.6337	20.7602	858
chr16	4674606	4675450	Peak_1087	246	.	4.99583	24.6035	20.731	341
chr2	101179335	101180084	Peak_1088	246	.	6.07438	24.6013	20.729	311
chr4	6784216	6785280	Peak_1089	246	.	5.97167	24.6013	20.729	461
chr5	179247709	179248411	Peak_1090	245	.	4.32579	24.5929	20.7213	393
chr16	1822399	1823454	Peak_1091	245	.	5.9278	24.5425	20.6715	611
chr2	9695958	9696769	Peak_1092	245	.	5.87851	24.5425	20.6715	359
chr7	32767756	32768402	Peak_1093	245	.	5.87851	24.5425	20.6715	372
chr21	33031719	33032692	Peak_1094	244	.	7.02542	24.4891	20.6204	548
chr2	88469682	88470501	Peak_1095	244	.	7.02542	24.4891	20.6204	348
chr5	96270007	96271335	Peak_1096	244	.	5.24833	24.4671	20.5993	729
chr9	127702882	127704117	Peak_1097	244	.	5.28801	24.4671	20.5993	554
chr11	66112136	66113060	Peak_1098	244	.	5.55137	24.4532	20.5858	592
chr12	112450365	112451080	Peak_1099	244	.	5.55137	24.4532	20.5858	368
chr15	80695928	80697206	Peak_1100	244	.	5.59534	24.4532	20.5858	797
chr20	34541402	34542370	Peak_1101	244	.	5.59534	24.4532	20.5858	563
chr2	25474352	25476114	Peak_1102	244	.	5.50741	24.4532	20.5858	484
chr6	18264149	18265124	Peak_1103	244	.	5.55137	24.4532	20.5858	390
chr8	101571377	101572148	Peak_1104	244	.	5.50741	24.4532	20.5858	429
chr9	140195487	140196386	Peak_1105	244	.	5.55137	24.4532	20.5858	409
chr10	70715359	70716384	Peak_1106	244	.	7.53836	24.4504	20.5855	335
chr1	224621561	224622307	Peak_1107	244	.	7.53836	24.4504	20.5855	421
chr17	80477865	80478815	Peak_1108	244	.	7.53836	24.4504	20.5855	344
chr18	32923657	32924683	Peak_1109	244	.	7.38012	24.4504	20.5855	514
chr1	87169923	87171186	Peak_1110	244	.	7.38012	24.4504	20.5855	835
chr19	21203281	21204033	Peak_1111	244	.	7.38012	24.4504	20.5855	348
chr4	15682822	15684035	Peak_1112	244	.	7.38012	24.4504	20.5855	702
chr10	120839433	120840746	Peak_1113	244	.	5.44334	24.4478	20.5849	559
chr16	89573955	89575554	Peak_1114	244	.	4.55086	24.4398	20.5772	1038
chr9	124360237	124361101	Peak_1115	244	.	4.58017	24.4398	20.5772	472
chr7	100033062	100034097	Peak_1116	244	.	4.91282	24.4305	20.5684	590
chr8	102216688	102217971	Peak_1117	244	.	4.91282	24.4305	20.5684	679
chr8	119123856	119124667	Peak_1118	244	.	6.42868	24.4178	20.5564	530
chr1	151254779	151255951	Peak_1119	243	.	4.23791	24.3931	20.5318	453
chr19	50094550	50095567	Peak_1120	243	.	6.629	24.3534	20.4924	582
chr5	98263799	98264599	Peak_1121	243	.	5.82626	24.3495	20.4885	313
chr6	74161187	74162235	Peak_1122	243	.	5.87511	24.3495	20.4885	622
chr7	116593224	116594424	Peak_1123	243	.	5.87511	24.3495	20.4885	618
chr13	20437776	20438944	Peak_1124	243	.	6.22482	24.3491	20.4885	423
chr14	55878103	55878763	Peak_1125	243	.	6.16987	24.3491	20.4885	376
chr19	36208293	36209805	Peak_1126	243	.	6.22482	24.3491	20.4885	924
chr1	152082967	152083946	Peak_1127	241	.	4.40382	24.1638	20.306	541
chr8	101224966	101225844	Peak_1128	241	.	4.43129	24.1638	20.306	423
chr3	119395660	119396609	Peak_1129	241	.	6.50022	24.1475	20.2901	337
chr4	2964519	2965418	Peak_1130	241	.	6.50022	24.1475	20.2901	488
chr9	132145363	132146571	Peak_1131	241	.	5.02914	24.1278	20.2711	329
chr16	18801043	18801723	Peak_1132	240	.	4.65611	24.0609	20.2051	382
chrX	129194106	129194849	Peak_1133	240	.	7.21937	24.0257	20.1705	407
chr1	1208735	1209391	Peak_1134	240	.	6.3637	24.0201	20.1652	388
chr16	30709217	30710073	Peak_1135	240	.	6.30492	24.0201	20.1652	501
chr6	37787425	37788260	Peak_1136	240	.	6.3637	24.0201	20.1652	486
chr20	39765404	39766255	Peak_1137	239	.	3.52834	23.9735	20.1193	420
chr14	60715379	60716857	Peak_1138	239	.	4.27407	23.9321	20.078	1060
chr11	65190312	65191141	Peak_1139	239	.	4.85619	23.9283	20.0745	508
chr17	17206497	17207258	Peak_1140	239	.	6.18364	23.9167	20.0631	316
chr1	212003337	212004314	Peak_1141	239	.	7.05415	23.9089	20.0557	560
chr14	60631610	60632405	Peak_1142	238	.	5.20657	23.8688	20.0163	512
chr2	198363680	198364755	Peak_1143	238	.	5.24653	23.8688	20.0163	685
chr3	170587284	170588464	Peak_1144	238	.	5.20657	23.8688	20.0163	475
chr6	79787417	79788421	Peak_1145	238	.	5.20657	23.8688	20.0163	691
chr20	7999734	8000509	Peak_1146	238	.	6.01938	23.8344	19.9828	454
chr5	168005992	168006716	Peak_1147	238	.	6.01938	23.8344	19.9828	410
chr12	133263222	133263994	Peak_1148	238	.	4.99912	23.8196	19.9686	424
chr4	48833099	48833924	Peak_1149	237	.	7.08022	23.7805	19.9296	429
chr2	174219073	174220148	Peak_1150	237	.	5.86895	23.7708	19.9206	384
chr17	3626629	3627238	Peak_1151	237	.	5.82923	23.7238	19.8751	336
chr1	151881456	151882400	Peak_1152	237	.	4.84518	23.7088	19.8609	403
chr12	48213012	48214074	Peak_1153	237	.	4.77755	23.7088	19.8609	372
chr2	48132119	48133474	Peak_1154	237	.	4.77755	23.7088	19.8609	355
chr16	75299201	75300486	Peak_1155	236	.	5.57627	23.6726	19.8272	935
chr5	41904326	41905040	Peak_1156	236	.	5.57627	23.6726	19.8272	308
chr15	65321350	65321958	Peak_1157	236	.	5.31603	23.6694	19.8244	409
chr11	65819210	65820414	Peak_1158	236	.	5.41949	23.6655	19.8213	781
chr12	106532690	106533451	Peak_1159	236	.	5.41949	23.6655	19.8213	362
chr12	49453176	49454746	Peak_1160	236	.	5.46345	23.6655	19.8213	847
chr12	57823838	57824959	Peak_1161	236	.	5.41949	23.6655	19.8213	671
chr15	73343815	73344587	Peak_1162	236	.	5.46345	23.6655	19.8213	386
chr17	80375957	80376917	Peak_1163	236	.	5.46345	23.6655	19.8213	424
chr3	121553356	121554067	Peak_1164	236	.	5.46345	23.6655	19.8213	271
chr8	22298049	22299186	Peak_1165	236	.	5.41949	23.6655	19.8213	457
chr9	97401175	97402123	Peak_1166	236	.	5.41949	23.6655	19.8213	335
chr6	138482621	138483686	Peak_1167	235	.	6.81935	23.5767	19.7351	629
chr6	42946130	42947184	Peak_1168	235	.	6.81935	23.5767	19.7351	588
chr10	131934640	131935644	Peak_1169	235	.	5.72857	23.5351	19.694	378
chr10	45496046	45496970	Peak_1170	235	.	5.77741	23.5351	19.694	456
chr12	110939297	110940071	Peak_1171	235	.	5.77741	23.5351	19.694	338
chr17	17108801	17109716	Peak_1172	235	.	5.72857	23.5351	19.694	550
chr17	27037753	27038481	Peak_1173	235	.	6.05996	23.5025	19.6632	398
chr20	3800521	3801506	Peak_1174	235	.	6.11492	23.5025	19.6632	343
chr2	220025082	220025786	Peak_1175	235	.	6.11492	23.5025	19.6632	386
chr3	147110784	147112550	Peak_1176	235	.	6.11492	23.5025	19.6632	632
chr11	126152547	126153630	Peak_1177	234	.	7.301	23.495	19.6571	596
chr21	34775413	34776560	Peak_1178	234	.	7.22187	23.495	19.6571	312
chr7	117823991	117824797	Peak_1179	234	.	7.22187	23.495	19.6571	320
chr7	63774212	63775202	Peak_1180	234	.	7.301	23.495	19.6571	458
chr14	35800993	35802089	Peak_1181	234	.	6.33766	23.4482	19.612	614
chr1	145610478	145611461	Peak_1182	234	.	3.91872	23.4439	19.6077	492
chr20	18547708	18548594	Peak_1183	233	.	4.9925	23.3895	19.5541	524
chr5	140699728	140700465	Peak_1184	233	.	4.9925	23.3895	19.5541	408
chr9	102668810	102669664	Peak_1185	233	.	4.95586	23.3895	19.5541	444
chr9	137218543	137219454	Peak_1186	233	.	4.95586	23.3895	19.5541	344
chr17	55037896	55038501	Peak_1187	233	.	4.59331	23.3604	19.5262	304
chr15	102192029	102192672	Peak_1188	233	.	4.28922	23.3055	19.4723	312
chr4	144434662	144435764	Peak_1189	232	.	6.43848	23.2701	19.4373	363
chr6	86388637	86389325	Peak_1190	232	.	6.37673	23.2701	19.4373	400
chr6	99395265	99396097	Peak_1191	232	.	7.18753	23.2008	19.369	422
chr1	151170935	151171985	Peak_1192	231	.	5.12664	23.1114	19.2803	434
chr12	49245388	49246104	Peak_1193	231	.	5.12664	23.1114	19.2803	336
chr16	47006949	47008173	Peak_1194	231	.	5.12664	23.1114	19.2803	425
chr16	30107428	30108081	Peak_1195	231	.	4.40411	23.1026	19.2724	306
chr5	179125181	179126888	Peak_1196	230	.	4.08547	23.0977	19.2676	1058
chr15	91498145	91498947	Peak_1197	230	.	4.40432	23.0702	19.2408	323
chr16	30389063	30390099	Peak_1198	230	.	4.43363	23.0702	19.2408	425
chr20	25676834	25677687	Peak_1199	230	.	4.40432	23.0702	19.2408	469
chr7	5820380	5821447	Peak_1200	230	.	4.43363	23.0702	19.2408	554
chr9	19230569	19231498	Peak_1201	230	.	6.01541	23.0691	19.2404	401
chr10	120863569	120864328	Peak_1202	230	.	5.91216	23.0001	19.1721	445
chr15	80987482	80988344	Peak_1203	230	.	5.91216	23.0001	19.1721	393
chr16	28857620	28858559	Peak_1204	230	.	5.96577	23.0001	19.1721	356
chr16	69795786	69796544	Peak_1205	230	.	5.96577	23.0001	19.1721	345
chr10	734642	735682	Peak_1206	229	.	4.70991	22.9939	19.167	343
chr2	96191955	96193471	Peak_1207	229	.	4.74373	22.9939	19.167	778
chr14	45366433	45367304	Peak_1208	229	.	5.00631	22.99	19.1637	391
chr10	88516288	88517366	Peak_1209	229	.	7.097	22.9639	19.1386	430
chr11	67980150	67981529	Peak_1210	229	.	5.1293	22.9516	19.1263	1006
chr3	184016958	184017598	Peak_1211	229	.	5.17852	22.9209	19.0966	318
chr5	180236794	180238318	Peak_1212	229	.	5.17852	22.9209	19.0966	296
chr6	24403061	24403840	Peak_1213	229	.	5.21953	22.9209	19.0966	386
chr3	142297149	142298212	Peak_1214	229	.	5.68137	22.9134	19.0895	326
chr3	47866168	47867036	Peak_1215	229	.	5.63209	22.9134	19.0895	522
chr9	103114545	103115509	Peak_1216	229	.	5.63209	22.9134	19.0895	359
chr16	2009318	2010001	Peak_1217	228	.	5.23116	22.8987	19.0753	282
chr16	73081876	73082807	Peak_1218	228	.	5.60309	22.892	19.0691	490
chr19	47249157	47249849	Peak_1219	228	.	5.60309	22.892	19.0691	349
chr3	133380056	133381019	Peak_1220	228	.	5.60309	22.892	19.0691	344
chr10	23384422	23385173	Peak_1221	228	.	5.33156	22.8858	19.0638	315
chr6	52148964	52149578	Peak_1222	228	.	5.37552	22.8858	19.0638	312
chr10	38264958	38265651	Peak_1223	228	.	6.93465	22.8583	19.0382	373
chr22	46465638	46466427	Peak_1224	228	.	6.93465	22.8583	19.0382	474
chr3	155587736	155589723	Peak_1225	228	.	4.29391	22.8287	19.0094	1350
chr1	151584132	151584738	Peak_1226	227	.	4.19552	22.7539	18.935	263
chr19	4968986	4969721	Peak_1227	227	.	6.36044	22.7298	18.9111	335
chr21	38444793	38445623	Peak_1228	227	.	6.36044	22.7298	18.9111	507
chr3	48955786	48956917	Peak_1229	227	.	6.42324	22.7298	18.9111	662
chr14	70825953	70826971	Peak_1230	226	.	4.5619	22.6664	18.8503	544
chr5	99870940	99871861	Peak_1231	226	.	4.5619	22.6664	18.8503	562
chr16	56458592	56459532	Peak_1232	226	.	5.8951	22.6649	18.8494	595
chr2	88354515	88355567	Peak_1233	226	.	5.95006	22.6649	18.8494	482
chr16	81110302	81111411	Peak_1234	226	.	4.84596	22.6584	18.8439	759
chr3	129611869	129612510	Peak_1235	226	.	4.56677	22.6505	18.8369	316
chr8	144717644	144718953	Peak_1236	226	.	4.17063	22.6283	18.8149	743
chr10	6205651	6206292	Peak_1237	225	.	4.62454	22.5715	18.7585	288
chr11	43702145	43702908	Peak_1238	225	.	7.06363	22.5502	18.7374	290
chr1	53386885	53387591	Peak_1239	225	.	7.14275	22.5502	18.7374	374
chr19	2150712	2151698	Peak_1240	225	.	7.14275	22.5502	18.7374	635
chr8	41908667	41909630	Peak_1241	225	.	7.14275	22.5502	18.7374	679
chr15	51057213	51058135	Peak_1242	225	.	3.45402	22.5177	18.707	489
chr1	115124227	115124925	Peak_1243	224	.	3.04451	22.4719	18.6614	287
chr20	40246403	40247091	Peak_1244	224	.	4.0122	22.4631	18.6526	392
chr3	12525824	12526627	Peak_1245	224	.	4.31847	22.4332	18.6228	358
chr16	29817949	29819667	Peak_1246	224	.	5.54705	22.4208	18.6107	266
chr7	5462990	5464601	Peak_1247	224	.	5.32025	22.4173	18.6073	718
chr16	1524697	1525640	Peak_1248	224	.	6.25324	22.4022	18.5922	569
chr6	20403205	20403923	Peak_1249	224	.	6.25324	22.4022	18.5922	368
chr11	33278593	33280437	Peak_1250	223	.	5.0467	22.3616	18.5531	478
chr11	67055675	67057660	Peak_1251	223	.	5.00674	22.3616	18.5531	1401
chr11	67797916	67798847	Peak_1252	223	.	5.0467	22.3616	18.5531	353
chr17	48226849	48227999	Peak_1253	223	.	5.08667	22.3616	18.5531	583
chr5	177026760	177027644	Peak_1254	223	.	5.0467	22.3616	18.5531	391
chr5	472506	473199	Peak_1255	223	.	5.00674	22.3616	18.5531	384
chr9	117373384	117374417	Peak_1256	223	.	5.08667	22.3616	18.5531	551
chr20	45987329	45988048	Peak_1257	223	.	2.11312	22.3287	18.5219	323
chr19	41222880	41223599	Peak_1258	223	.	6.38815	22.3223	18.5155	298
chr16	80966134	80966770	Peak_1259	223	.	4.85358	22.3039	18.4976	256
chr21	45079055	45079711	Peak_1260	223	.	4.85358	22.3039	18.4976	313
chr12	108154325	108155120	Peak_1261	222	.	4.64228	22.2861	18.48	497
chr8	57905462	57906480	Peak_1262	222	.	4.64228	22.2861	18.48	646
chr1	33814729	33815489	Peak_1263	222	.	7.03175	22.2642	18.4589	439
chr2	201980704	201982220	Peak_1264	222	.	5.95934	22.2305	18.4255	656
chr17	56160666	56161691	Peak_1265	222	.	3.58704	22.2144	18.4099	428
chr7	99063292	99064210	Peak_1266	222	.	5.04994	22.2052	18.4007	430
chr1	113217214	113218246	Peak_1267	221	.	5.75132	22.1746	18.3707	333
chr22	20105049	20105914	Peak_1268	221	.	5.75132	22.1746	18.3707	283
chr3	12704746	12706285	Peak_1269	221	.	4.23896	22.1705	18.3672	565
chr11	110166361	110167519	Peak_1270	221	.	6.90978	22.1486	18.3459	630
chr11	33757361	33758292	Peak_1271	221	.	6.98718	22.1486	18.3459	435
chr5	172197447	172198281	Peak_1272	221	.	5.14629	22.136	18.3335	358
chr10	94333024	94334308	Peak_1273	221	.	5.71487	22.1356	18.3335	641
chr16	68056296	68057672	Peak_1274	221	.	5.61216	22.1356	18.3335	546
chr19	45680970	45681581	Peak_1275	221	.	5.61216	22.1356	18.3335	310
chr14	31028170	31028923	Peak_1276	221	.	5.24363	22.1142	18.313	416
chr20	45317412	45318084	Peak_1277	221	.	5.24363	22.1142	18.313	352
chr2	232468645	232470112	Peak_1278	221	.	5.2876	22.1142	18.313	666
chr6	139308402	139309573	Peak_1279	221	.	5.2876	22.1142	18.313	614
chr6	42420030	42420724	Peak_1280	221	.	5.2876	22.1142	18.313	318
chr10	22517947	22518588	Peak_1281	221	.	5.53352	22.1116	18.3118	273
chr2	112641062	112641714	Peak_1282	221	.	5.4136	22.1009	18.3022	422
chr15	51200735	51201420	Peak_1283	220	.	3.6424	22.0677	18.2701	334
chr17	62206838	62207522	Peak_1284	220	.	3.26347	22.0129	18.2156	363
chr3	141867581	141868499	Peak_1285	219	.	4.4677	21.9793	18.1823	498
chr7	156432359	156433883	Peak_1286	219	.	4.4677	21.9793	18.1823	631
chr1	17764239	17765211	Peak_1287	219	.	5.48433	21.9316	18.137	491
chr14	50234094	50235701	Peak_1288	219	.	5.48433	21.9316	18.137	821
chr1	8021610	8022338	Peak_1289	219	.	5.53318	21.9316	18.137	347
chr12	12764289	12765493	Peak_1290	218	.	6.17203	21.863	18.0696	260
chr4	78739535	78741717	Peak_1291	218	.	6.17203	21.863	18.0696	1643
chr10	85899080	85899766	Peak_1292	217	.	6.47589	21.7819	17.9906	330
chr16	2317556	2318380	Peak_1293	217	.	6.47589	21.7819	17.9906	331
chr2	70475157	70475869	Peak_1294	217	.	6.40719	21.7819	17.9906	329
chr6	84140349	84141582	Peak_1295	217	.	6.63718	21.7305	17.9399	333
chr10	90342337	90343379	Peak_1296	216	.	6.32612	21.6492	17.8597	368
chr1	224033553	224034729	Peak_1297	216	.	4.92681	21.6195	17.8306	432
chr2	24149132	24150110	Peak_1298	216	.	4.92681	21.6195	17.8306	451
chr2	61991391	61992084	Peak_1299	216	.	4.96677	21.6195	17.8306	282
chr7	89975779	89976475	Peak_1300	216	.	4.92681	21.6195	17.8306	332
chr9	134000696	134001483	Peak_1301	216	.	4.96677	21.6195	17.8306	348
chr1	11159373	11160211	Peak_1302	216	.	6.98451	21.6163	17.8285	327
chr12	7079108	7080126	Peak_1303	216	.	6.90539	21.6163	17.8285	564
chr1	84326116	84326921	Peak_1304	216	.	6.98451	21.6163	17.8285	357
chr18	48494174	48495032	Peak_1305	216	.	6.98451	21.6163	17.8285	464
chr14	24024961	24025657	Peak_1306	215	.	4.60846	21.5854	17.7994	350
chr16	89313125	89313884	Peak_1307	215	.	4.54083	21.5854	17.7994	431
chr17	46687448	46688311	Peak_1308	215	.	4.60846	21.5854	17.7994	399
chr17	48796558	48797478	Peak_1309	215	.	4.54083	21.5854	17.7994	566
chr3	139107892	139109212	Peak_1310	215	.	4.57464	21.5854	17.7994	496
chr7	26241463	26242304	Peak_1311	215	.	4.81632	21.5797	17.7948	412
chr16	2034068	2034981	Peak_1312	215	.	5.98107	21.5535	17.7689	369
chr5	74807621	74808232	Peak_1313	215	.	6.068	21.5439	17.7593	292
chr15	78556409	78557506	Peak_1314	215	.	4.8526	21.52	17.736	337
chr9	140082914	140083699	Peak_1315	215	.	4.184	21.5187	17.735	453
chr10	104402620	104405052	Peak_1316	214	.	5.89351	21.4623	17.6795	1348
chr21	38378790	38379709	Peak_1317	214	.	6.01105	21.4623	17.6795	336
chr9	4740397	4741373	Peak_1318	214	.	5.89351	21.4623	17.6795	723
chr8	128806276	128807053	Peak_1319	214	.	3.25441	21.4527	17.6708	373
chr8	64080341	64081776	Peak_1320	214	.	5.79111	21.4012	17.6198	1085
chr12	51419461	51420195	Peak_1321	213	.	5.98226	21.3716	17.5909	351
chr20	62886436	62887483	Peak_1322	213	.	4.38602	21.3637	17.583	470
chr4	2010335	2011553	Peak_1323	213	.	5.64409	21.3583	17.5777	874
chr11	65685830	65687282	Peak_1324	213	.	5.19967	21.3507	17.5708	473
chr17	45144452	45145043	Peak_1325	213	.	5.15571	21.3507	17.5708	278
chr19	58873293	58874280	Peak_1326	213	.	5.19967	21.3507	17.5708	583
chr2	228336757	228337509	Peak_1327	213	.	5.15571	21.3507	17.5708	323
chr2	230932586	230933587	Peak_1328	213	.	5.15571	21.3507	17.5708	534
chr10	38383216	38384032	Peak_1329	213	.	5.50944	21.3313	17.5537	264
chr14	62162160	62163099	Peak_1330	213	.	5.5608	21.3313	17.5537	302
chr17	18218549	18219191	Peak_1331	213	.	5.50944	21.3313	17.5537	285
chr5	154134028	154136795	Peak_1332	213	.	5.50944	21.3313	17.5537	1919
chr2	96931374	96932506	Peak_1333	213	.	5.21143	21.3294	17.5523	858
chr7	87848882	87849539	Peak_1334	213	.	5.21143	21.3294	17.5523	350
chr1	179555182	179555836	Peak_1335	213	.	5.31885	21.3183	17.5418	297
chr13	111566316	111567320	Peak_1336	213	.	5.31885	21.3183	17.5418	371
chr14	90797587	90798590	Peak_1337	212	.	4.40489	21.2991	17.5235	417
chr5	114879727	114880489	Peak_1338	212	.	4.37349	21.2991	17.5235	461
chr14	105864767	105865547	Peak_1339	212	.	4.16403	21.2265	17.4517	344
chr19	52551808	52552727	Peak_1340	212	.	6.75498	21.2264	17.4516	546
chr12	98987349	98988432	Peak_1341	212	.	4.69942	21.2184	17.4439	265
chr16	24740838	24741600	Peak_1342	212	.	4.69942	21.2184	17.4439	369
chr16	70557553	70558434	Peak_1343	212	.	4.69942	21.2184	17.4439	364
chr3	13008589	13009278	Peak_1344	212	.	4.73605	21.2184	17.4439	413
chr3	24536299	24537442	Peak_1345	212	.	4.73605	21.2184	17.4439	397
chr5	176852906	176854206	Peak_1346	212	.	4.73605	21.2184	17.4439	957
chr7	155437099	155438027	Peak_1347	212	.	3.9145	21.2117	17.438	358
chr2	21022110	21022954	Peak_1348	211	.	6.26446	21.1748	17.4017	497
chrX	3733612	3734277	Peak_1349	211	.	6.54126	21.1635	17.3903	318
chr18	9613833	9614529	Peak_1350	211	.	5.38663	21.1429	17.3701	339
chr20	2083220	2084157	Peak_1351	211	.	5.38663	21.1429	17.3701	420
chr5	126853461	126854171	Peak_1352	211	.	5.43548	21.1429	17.3701	359
chr7	129845120	129845683	Peak_1353	211	.	5.43548	21.1429	17.3701	224
chr8	54754980	54756433	Peak_1354	211	.	5.43548	21.1429	17.3701	589
chr19	44860456	44861051	Peak_1355	210	.	6.57072	21.0454	17.2752	339
chr1	114471868	114472960	Peak_1356	210	.	2.62228	21.0324	17.2628	621
chr10	70748470	70749198	Peak_1357	210	.	5.67529	21.0171	17.2475	284
chr11	12399102	12400021	Peak_1358	210	.	5.67529	21.0171	17.2475	578
chr15	43425573	43426434	Peak_1359	210	.	5.67529	21.0171	17.2475	501
chr17	39811872	39812619	Peak_1360	210	.	5.67529	21.0171	17.2475	438
chr19	36705596	36706566	Peak_1361	210	.	5.67529	21.0171	17.2475	429
chr5	111496382	111497089	Peak_1362	210	.	5.67529	21.0171	17.2475	305
chr17	37617264	37618129	Peak_1363	210	.	6.04642	21.0061	17.2377	475
chr4	140222642	140223592	Peak_1364	210	.	6.10922	21.0061	17.2377	559
chr15	50978324	50979590	Peak_1365	209	.	3.62744	20.9531	17.1857	908
chr5	32173655	32174709	Peak_1366	209	.	4.63758	20.9352	17.1679	412
chr17	65713839	65714636	Peak_1367	209	.	3.56247	20.9076	17.1405	460
chr10	114711330	114712610	Peak_1368	208	.	6.26981	20.9	17.133	875
chr13	25875704	25876509	Peak_1369	208	.	6.26981	20.9	17.133	454
chr3	136469963	136471128	Peak_1370	208	.	4.50701	20.8919	17.1255	766
chr9	95527051	95527810	Peak_1371	208	.	4.47319	20.8919	17.1255	474
chr12	104359361	104360364	Peak_1372	208	.	4.88684	20.8853	17.1196	612
chr12	109250978	109251757	Peak_1373	208	.	4.70455	20.8631	17.0989	246
chr21	46890772	46891334	Peak_1374	208	.	5.19787	20.8618	17.0978	248
chr3	43146963	43147739	Peak_1375	207	.	6.13102	20.7848	17.0213	506
chr14	100751634	100752367	Peak_1376	207	.	4.81188	20.7359	16.9729	334
chr9	136214275	136214951	Peak_1377	206	.	5.21721	20.6959	16.9335	334
chr15	56535380	56536206	Peak_1378	206	.	6.00626	20.6956	16.9331	317
chr1	16010515	16011341	Peak_1379	206	.	6.74714	20.6936	16.9317	261
chr16	46723321	46724281	Peak_1380	206	.	6.82626	20.6936	16.9317	453
chr4	54243782	54244566	Peak_1381	206	.	6.82626	20.6936	16.9317	409
chr6	26659327	26660180	Peak_1382	206	.	6.66802	20.6936	16.9317	469
chr16	28222750	28223414	Peak_1383	206	.	4.32304	20.6891	16.9298	346
chr12	113860109	113860758	Peak_1384	206	.	6.72811	20.6449	16.8861	294
chr14	77499011	77499785	Peak_1385	206	.	4.93412	20.6348	16.876	327
chr12	12966155	12967059	Peak_1386	206	.	5.83473	20.6288	16.8706	334
chr2	232328406	232330380	Peak_1387	206	.	5.77596	20.6288	16.8706	1512
chr16	20911800	20912503	Peak_1388	206	.	4.31069	20.6258	16.8682	349
chr2	190538999	190539681	Peak_1389	206	.	4.34209	20.6258	16.8682	358
chr5	131746094	131747031	Peak_1390	206	.	4.34209	20.6258	16.8682	422
chr5	171710356	171711235	Peak_1391	206	.	4.31069	20.6258	16.8682	560
chr2	204103347	204104156	Peak_1392	205	.	5.02382	20.5956	16.8386	451
chr2	69870758	69871668	Peak_1393	205	.	5.02382	20.5956	16.8386	576
chr20	62600356	62601205	Peak_1394	205	.	3.86566	20.5951	16.8386	493
chr2	219263191	219265210	Peak_1395	205	.	5.12022	20.5652	16.8108	567
chr3	88107523	88108301	Peak_1396	205	.	5.22411	20.5444	16.791	365
chr7	74071968	74072726	Peak_1397	205	.	5.17673	20.5444	16.791	339
chr3	40565803	40566837	Peak_1398	205	.	5.40673	20.536	16.7835	451
chr15	90118605	90119391	Peak_1399	205	.	5.28709	20.5342	16.7821	351
chr19	50145259	50146058	Peak_1400	205	.	5.28709	20.5342	16.7821	337
chr16	576658	578781	Peak_1401	205	.	4.58951	20.5098	16.7581	473
chr5	112196719	112197531	Peak_1402	205	.	4.58951	20.5098	16.7581	359
chr5	32312037	32313087	Peak_1403	205	.	4.58951	20.5098	16.7581	623
chr6	35463874	35464621	Peak_1404	205	.	4.58951	20.5098	16.7581	322
chr11	71935593	71936303	Peak_1405	204	.	4.16985	20.4095	16.6598	351
chr13	28195440	28196739	Peak_1406	203	.	5.24009	20.363	16.6141	351
chr17	76210203	76211024	Peak_1407	203	.	5.28894	20.363	16.6141	444
chr2	54197206	54198606	Peak_1408	203	.	5.28894	20.363	16.6141	759
chr6	138427958	138428683	Peak_1409	203	.	5.24009	20.363	16.6141	320
chr7	75543731	75544750	Peak_1410	203	.	5.28894	20.363	16.6141	326
chr11	94276809	94277596	Peak_1411	202	.	6.46799	20.2698	16.5233	367
chr16	21610682	21611721	Peak_1412	202	.	4.17091	20.2377	16.4916	625
chr2	47596397	47597375	Peak_1413	202	.	4.60143	20.2328	16.4871	596
chr20	55840928	55841647	Peak_1414	202	.	1.8043	20.2095	16.4642	295
chr1	227127136	227127794	Peak_1415	202	.	5.51043	20.2072	16.4619	338
chr1	27286290	27287115	Peak_1416	202	.	5.56538	20.2072	16.4619	390
chr14	105886054	105886798	Peak_1417	202	.	5.51043	20.2072	16.4619	368
chr16	66583331	66584234	Peak_1418	202	.	5.56538	20.2072	16.4619	499
chr7	45150561	45151826	Peak_1419	202	.	5.51043	20.2072	16.4619	548
chr9	103189530	103190195	Peak_1420	202	.	5.62034	20.2072	16.4619	318
chr10	27793132	27793995	Peak_1421	202	.	4.40556	20.2058	16.4619	330
chr15	72667851	72668801	Peak_1422	202	.	4.43937	20.2058	16.4619	326
chr3	15140179	15140959	Peak_1423	202	.	4.43937	20.2058	16.4619	377
chr6	155054154	155055401	Peak_1424	202	.	4.40556	20.2058	16.4619	919
chr9	34328732	34330073	Peak_1425	202	.	4.43937	20.2058	16.4619	460
chr8	92052653	92053358	Peak_1426	202	.	5.02637	20.2027	16.4597	398
chr1	6452882	6454321	Peak_1427	201	.	5.85801	20.1593	16.4164	883
chr19	17356110	17356976	Peak_1428	201	.	5.92081	20.1593	16.4164	314
chr19	8069888	8070803	Peak_1429	201	.	5.85801	20.1593	16.4164	391
chr2	197663882	197664812	Peak_1430	201	.	5.92081	20.1593	16.4164	570
chr3	52719326	52720513	Peak_1431	201	.	5.85801	20.1593	16.4164	394
chr4	38664652	38665456	Peak_1432	201	.	5.98361	20.1593	16.4164	382
chr10	15138935	15139808	Peak_1433	201	.	4.80691	20.1592	16.4164	383
chr2	223725650	223726428	Peak_1434	201	.	4.80691	20.1592	16.4164	412
chr13	115079428	115080432	Peak_1435	201	.	6.35237	20.1551	16.4144	644
chr19	58838160	58838831	Peak_1436	201	.	6.42515	20.1551	16.4144	382
chr14	73393153	73393874	Peak_1437	201	.	4.63004	20.1543	16.414	395
chr1	174968105	174968975	Peak_1438	201	.	5.82941	20.1542	16.414	387
chr9	134405940	134407099	Peak_1439	201	.	4.21436	20.1283	16.3882	862
chr9	139376949	139377553	Peak_1440	200	.	4.66045	20.081	16.3414	329
chr5	139486656	139487366	Peak_1441	200	.	6.13243	20.0287	16.2894	413
chr5	74161452	74162366	Peak_1442	200	.	4.29155	20.0216	16.2829	483
chr10	33246538	33247591	Peak_1443	200	.	4.73252	20.0132	16.2746	577
chr12	69201688	69202455	Peak_1444	200	.	4.7722	20.0132	16.2746	347
chr9	114393230	114394298	Peak_1445	200	.	4.73252	20.0132	16.2746	663
chr9	130741280	130742221	Peak_1446	200	.	4.7722	20.0132	16.2746	515
chr16	11836065	11836968	Peak_1447	199	.	3.79238	19.9847	16.2464	407
chr10	5530735	5531345	Peak_1448	199	.	4.27929	19.9597	16.2216	265
chr15	65822454	65823733	Peak_1449	199	.	4.24788	19.9597	16.2216	539
chr14	21457691	21458661	Peak_1450	199	.	5.78854	19.9473	16.2107	335
chr6	86302878	86303711	Peak_1451	199	.	6.09813	19.9313	16.1949	346
chr3	149530184	149531134	Peak_1452	198	.	4.84925	19.8966	16.1608	333
chr19	32836406	32837159	Peak_1453	198	.	5.82102	19.8574	16.1221	355
chrX	152988946	152989918	Peak_1454	198	.	5.82102	19.8574	16.1221	499
chr2	170335587	170336410	Peak_1455	198	.	4.9359	19.8491	16.1145	541
chr6	82956740	82958028	Peak_1456	198	.	4.9359	19.8491	16.1145	836
chr1	184020555	184021447	Peak_1457	198	.	4.51624	19.8089	16.0768	448
chr18	22006183	22007343	Peak_1458	197	.	6.50977	19.7825	16.0518	694
chr18	61089633	61090447	Peak_1459	197	.	6.5889	19.7825	16.0518	344
chr6	158243688	158245203	Peak_1460	197	.	6.50977	19.7825	16.0518	676
chr9	33076258	33076859	Peak_1461	197	.	6.5889	19.7825	16.0518	354
chr17	5389832	5390398	Peak_1462	197	.	5.12936	19.7794	16.0502	258
chr6	26597029	26597773	Peak_1463	197	.	5.51074	19.7712	16.0426	283
chr9	100458869	100459734	Peak_1464	197	.	4.11123	19.7612	16.033	515
chr9	131084789	131085536	Peak_1465	197	.	4.08193	19.7612	16.033	400
chr9	133454820	133455584	Peak_1466	197	.	4.11123	19.7612	16.033	358
chr17	27717250	27718050	Peak_1467	197	.	5.2378	19.759	16.0312	393
chr11	65769372	65770162	Peak_1468	197	.	5.37603	19.7535	16.0262	298
chr15	90436671	90437386	Peak_1469	197	.	5.42964	19.7535	16.0262	281
chr18	2655428	2656866	Peak_1470	197	.	5.37603	19.7535	16.0262	832
chr2	55844128	55845236	Peak_1471	197	.	5.48325	19.7535	16.0262	465
chr5	1344597	1345738	Peak_1472	197	.	6.09821	19.7388	16.0128	824
chr14	74035709	74036618	Peak_1473	197	.	6.49141	19.7353	16.0092	494
chr6	42531646	42532483	Peak_1474	196	.	6.16853	19.6519	15.9262	335
chr1	178995025	178995972	Peak_1475	196	.	4.46912	19.6273	15.9018	552
chr12	49658801	49659716	Peak_1476	196	.	4.434	19.6273	15.9018	422
chr12	58258786	58259581	Peak_1477	196	.	3.99167	19.6025	15.8772	422
chr21	44526891	44527735	Peak_1478	196	.	3.99167	19.6025	15.8772	440
chr13	103452347	103453220	Peak_1479	195	.	5.1424	19.5921	15.8671	486
chr19	13976306	13977118	Peak_1480	195	.	5.1424	19.5921	15.8671	453
chr19	57831672	57832617	Peak_1481	195	.	5.1424	19.5921	15.8671	334
chr2	220093915	220094652	Peak_1482	195	.	5.1424	19.5921	15.8671	343
chr14	23771030	23772045	Peak_1483	195	.	4.45681	19.5382	15.8145	302
chr2	8818680	8819795	Peak_1484	195	.	4.33792	19.5271	15.8037	679
chr7	107220504	107221154	Peak_1485	194	.	4.51827	19.4534	15.7313	416
chr10	79685257	79687022	Peak_1486	194	.	6.44538	19.4157	15.6954	1020
chr4	2757628	2758278	Peak_1487	194	.	6.36798	19.4157	15.6954	300
chr10	105726774	105727436	Peak_1488	194	.	5.40052	19.4071	15.687	388
chr19	40790676	40791877	Peak_1489	194	.	5.45548	19.4071	15.687	886
chr6	144537115	144537701	Peak_1490	194	.	5.45548	19.4071	15.687	293
chr13	31038215	31039241	Peak_1491	193	.	6.24817	19.3873	15.6682	483
chrX	149861658	149862499	Peak_1492	193	.	6.32144	19.3873	15.6682	405
chr11	118401184	118401989	Peak_1493	193	.	3.74354	19.3806	15.6623	473
chr10	101379783	101381413	Peak_1494	193	.	5.7324	19.3229	15.6053	1093
chr14	23938589	23939473	Peak_1495	193	.	4.18508	19.3008	15.5842	377
chr16	10479670	10480522	Peak_1496	193	.	4.15368	19.3008	15.5842	408
chr16	74330293	74331264	Peak_1497	193	.	4.15368	19.3008	15.5842	612
chr16	89626494	89627783	Peak_1498	193	.	4.18508	19.3008	15.5842	438
chr7	5465870	5468189	Peak_1499	193	.	4.18508	19.3008	15.5842	1147
chr12	52540590	52541780	Peak_1500	192	.	4.61349	19.2987	15.5828	474
chr14	35805720	35806436	Peak_1501	192	.	4.61349	19.2987	15.5828	427
chr8	102218084	102218659	Peak_1502	192	.	4.69284	19.2987	15.5828	220
chr19	23432457	23433321	Peak_1503	192	.	6.20679	19.2761	15.5608	486
chr4	6717808	6718691	Peak_1504	192	.	6.27958	19.2761	15.5608	375
chr7	104652252	104653336	Peak_1505	192	.	4.72741	19.2297	15.5154	659
chr17	56596440	56596926	Peak_1506	192	.	3.78986	19.2118	15.4979	230
chr20	57466707	57467577	Peak_1507	192	.	3.92295	19.209	15.4951	368
chr18	3261442	3263081	Peak_1508	192	.	3.44257	19.2087	15.4948	370
chr16	73091484	73092462	Peak_1509	192	.	5.31977	19.2027	15.489	309
chr10	92980300	92981146	Peak_1510	191	.	5.99504	19.1683	15.4547	306
chr14	21737855	21738543	Peak_1511	191	.	4.05262	19.12	15.4075	314
chr19	11039288	11040210	Peak_1512	191	.	4.05262	19.12	15.4075	391
chr14	104181243	104181880	Peak_1513	191	.	4.4796	19.1159	15.4038	381
chr14	78226865	78227687	Peak_1514	191	.	4.44297	19.1159	15.4038	313
chr1	182360114	182361896	Peak_1515	191	.	4.89193	19.1112	15.4	632
chr14	31494679	31496214	Peak_1516	191	.	4.89193	19.1112	15.4	509
chr16	85044528	85045494	Peak_1517	191	.	4.80401	19.1112	15.4	402
chr17	29335169	29336094	Peak_1518	191	.	4.84797	19.1112	15.4	435
chr19	45574122	45575162	Peak_1519	191	.	4.89193	19.1112	15.4	244
chr19	55987324	55988000	Peak_1520	191	.	4.80401	19.1112	15.4	321
chr20	42838835	42839452	Peak_1521	191	.	4.84797	19.1112	15.4	329
chr2	27958204	27958963	Peak_1522	191	.	4.80401	19.1112	15.4	389
chr3	122134823	122135474	Peak_1523	191	.	4.89193	19.1112	15.4	293
chr9	136024209	136024884	Peak_1524	191	.	4.84797	19.1112	15.4	356
chr11	32604939	32605852	Peak_1525	190	.	5.87088	19.0874	15.3784	555
chr4	73934869	73935657	Peak_1526	190	.	5.87088	19.0874	15.3784	368
chr1	149223426	149224003	Peak_1527	190	.	3.81866	19.0777	15.369	202
chr12	62996134	62997111	Peak_1528	190	.	4.27594	19.0452	15.3371	623
chr10	75545065	75545999	Peak_1529	190	.	5.69753	19.0296	15.3217	453
chr6	170123334	170124047	Peak_1530	190	.	5.63579	19.0296	15.3217	468
chr17	19880517	19881290	Peak_1531	190	.	4.98724	19.0234	15.3161	331
chr5	68462451	68463534	Peak_1532	189	.	5.08995	18.9931	15.2863	736
chr12	129307771	129308384	Peak_1533	189	.	5.59964	18.9916	15.2851	317
chr12	72056702	72057866	Peak_1534	189	.	5.48209	18.9916	15.2851	677
chr14	78266273	78266994	Peak_1535	189	.	5.59964	18.9916	15.2851	329
chr4	141294703	141295407	Peak_1536	189	.	5.48209	18.9916	15.2851	319
chr5	178450717	178451339	Peak_1537	189	.	5.59964	18.9916	15.2851	302
chr16	30456465	30457267	Peak_1538	189	.	3.90924	18.9772	15.2716	346
chr9	111881528	111882534	Peak_1539	189	.	3.93671	18.9772	15.2716	491
chr1	231556826	231558603	Peak_1540	189	.	5.14993	18.9734	15.2682	1343
chr2	43446839	43447749	Peak_1541	189	.	5.14993	18.9734	15.2682	502
chr5	122180747	122181639	Peak_1542	189	.	5.25265	18.9734	15.2682	328
chr1	32573618	32574546	Peak_1543	189	.	5.2688	18.9655	15.2614	334
chr20	32077479	32078526	Peak_1544	189	.	5.2688	18.9655	15.2614	755
chr2	148601506	148602173	Peak_1545	189	.	5.2688	18.9655	15.2614	348
chr12	96793512	96794352	Peak_1546	189	.	4.36378	18.9464	15.2428	482
chr17	66016048	66016630	Peak_1547	188	.	3.47209	18.8895	15.1864	238
chr1	243419144	243419814	Peak_1548	188	.	6.35153	18.8831	15.1802	333
chr15	25683091	25684692	Peak_1549	188	.	6.43065	18.8831	15.1802	328
chr17	30668722	30669442	Peak_1550	188	.	6.43065	18.8831	15.1802	439
chr17	30677049	30677880	Peak_1551	188	.	6.35153	18.8831	15.1802	317
chr17	40021008	40021792	Peak_1552	188	.	6.43065	18.8831	15.1802	327
chr7	29724441	29725212	Peak_1553	188	.	6.35153	18.8831	15.1802	413
chr7	39662546	39663596	Peak_1554	188	.	4.27029	18.8561	15.1548	391
chr19	24216109	24217027	Peak_1555	188	.	5.0447	18.8305	15.1308	431
chr15	99270706	99271293	Peak_1556	188	.	5.10698	18.8227	15.1243	338
chr12	132194997	132196084	Peak_1557	187	.	4.48101	18.7605	15.0626	833
chr17	60729522	60729997	Peak_1558	187	.	2.89454	18.7473	15.0496	281
chr19	52207340	52207907	Peak_1559	187	.	6.29296	18.7333	15.0357	287
chr13	44453107	44454138	Peak_1560	187	.	4.56711	18.7317	15.0341	621
chr17	56083753	56084738	Peak_1561	187	.	3.2229	18.7092	15.0127	516
chr1	116518464	116519921	Peak_1562	186	.	3.50107	18.6828	14.9865	841
chr11	65430013	65431279	Peak_1563	186	.	4.12228	18.6492	14.9535	755
chr2	220407664	220408556	Peak_1564	186	.	4.09087	18.6492	14.9535	472
chr12	9217044	9217784	Peak_1565	186	.	5.29062	18.6168	14.9219	347
chr8	71519680	71520441	Peak_1566	186	.	5.29062	18.6168	14.9219	383
chr14	75348315	75349076	Peak_1567	185	.	4.17887	18.5953	14.9014	471
chr1	202976358	202977174	Peak_1568	185	.	4.57381	18.5926	14.8988	457
chr17	48624298	48625039	Peak_1569	185	.	4.53413	18.5926	14.8988	323
chr1	14075449	14076446	Peak_1570	185	.	6.29059	18.5279	14.8346	693
chr1	29646805	29647530	Peak_1571	185	.	6.29059	18.5279	14.8346	399
chr1	51984384	51984998	Peak_1572	185	.	6.29059	18.5279	14.8346	264
chr17	45000331	45000995	Peak_1573	185	.	4.60438	18.5164	14.8234	320
chr8	48649885	48651556	Peak_1574	185	.	4.60438	18.5164	14.8234	451
chr2	231280660	231281290	Peak_1575	185	.	6.02836	18.5163	14.8234	325
chr3	44902891	44904028	Peak_1576	185	.	6.02836	18.5163	14.8234	759
chrX	40945462	40946156	Peak_1577	185	.	6.02836	18.5163	14.8234	348
chr10	119805651	119806817	Peak_1578	184	.	5.6696	18.4972	14.8051	495
chr22	39714986	39715764	Peak_1579	184	.	5.60679	18.4972	14.8051	422
chr1	117452588	117453407	Peak_1580	184	.	3.994	18.4858	14.7947	384
chr9	114658391	114659052	Peak_1581	184	.	4.19288	18.4849	14.7943	302
chr15	69744818	69745733	Peak_1582	184	.	4.67951	18.4461	14.7558	517
chr7	93633214	93633787	Peak_1583	184	.	5.50277	18.4349	14.7452	274
chr19	58891779	58892551	Peak_1584	184	.	4.40633	18.431	14.7413	445
chr3	10067777	10068568	Peak_1585	184	.	4.3697	18.431	14.7413	382
chr9	125703152	125703810	Peak_1586	184	.	4.3697	18.431	14.7413	345
chr9	74978737	74980231	Peak_1587	184	.	4.3697	18.431	14.7413	573
chr19	46388688	46389577	Peak_1588	184	.	3.95415	18.4297	14.741	349
chr11	61735344	61736385	Peak_1589	184	.	5.98844	18.4086	14.72	627
chr14	31925942	31926832	Peak_1590	183	.	4.76005	18.3822	14.6942	476
chr2	101869216	101869890	Peak_1591	183	.	4.71608	18.3822	14.6942	352
chr2	109335689	109336422	Peak_1592	183	.	4.71608	18.3822	14.6942	403
chr2	202507509	202508345	Peak_1593	183	.	4.71608	18.3822	14.6942	299
chr3	128444880	128445651	Peak_1594	183	.	4.76005	18.3822	14.6942	330
chr5	134209610	134210786	Peak_1595	183	.	4.71608	18.3822	14.6942	669
chr6	170863241	170863954	Peak_1596	183	.	4.76005	18.3822	14.6942	414
chr15	77224025	77224751	Peak_1597	183	.	3.82681	18.3587	14.6726	319
chr13	108870146	108870907	Peak_1598	183	.	5.92635	18.3191	14.6337	425
chr14	88459044	88459933	Peak_1599	182	.	4.89249	18.2767	14.5921	489
chr19	12273747	12274389	Peak_1600	182	.	4.89249	18.2767	14.5921	357
chr1	46859759	46860446	Peak_1601	182	.	5.67578	18.2549	14.5711	374
chr11	62413200	62414085	Peak_1602	182	.	4.94209	18.2367	14.5533	466
chr12	42719449	42720077	Peak_1603	182	.	5.57404	18.2124	14.5297	255
chr17	17494419	17495383	Peak_1604	182	.	5.51229	18.2124	14.5297	541
chr6	151814771	151815628	Peak_1605	182	.	5.51229	18.2124	14.5297	273
chr6	153304622	153305393	Peak_1606	182	.	5.51229	18.2124	14.5297	295
chr17	27277745	27278536	Peak_1607	182	.	5.04722	18.2065	14.5243	509
chr19	24097554	24098254	Peak_1608	181	.	5.36454	18.1885	14.5076	264
chr12	133404731	133405689	Peak_1609	181	.	5.21519	18.1874	14.5071	516
chr6	151710966	151712187	Peak_1610	181	.	5.28644	18.1809	14.5013	296
chr20	48993256	48993767	Peak_1611	181	.	3.42571	18.1742	14.4953	265
chr10	5507901	5509004	Peak_1612	180	.	4.89816	18.0784	14.4003	594
chr11	77348306	77349034	Peak_1613	180	.	4.89816	18.0784	14.4003	314
chr12	12714364	12715267	Peak_1614	180	.	4.99585	18.0784	14.4003	440
chr15	89921433	89922338	Peak_1615	180	.	4.99585	18.0784	14.4003	571
chr19	15947224	15947906	Peak_1616	180	.	4.94701	18.0784	14.4003	359
chr19	48113063	48113730	Peak_1617	180	.	4.99585	18.0784	14.4003	310
chr22	32870559	32871250	Peak_1618	180	.	4.99585	18.0784	14.4003	334
chr4	1341026	1341704	Peak_1619	180	.	4.94701	18.0784	14.4003	291
chr5	108083902	108084558	Peak_1620	180	.	4.94701	18.0784	14.4003	307
chr5	179333707	179335285	Peak_1621	180	.	4.89816	18.0784	14.4003	1225
chr6	74018832	74019790	Peak_1622	180	.	4.99585	18.0784	14.4003	455
chr14	24610159	24610810	Peak_1623	180	.	4.4065	18.0758	14.3996	347
chr19	42363768	42364813	Peak_1624	180	.	4.52714	18.0307	14.3548	497
chr2	182756517	182757476	Peak_1625	180	.	4.02807	18.0051	14.3305	432
chr10	75011774	75012578	Peak_1626	179	.	6.27241	17.9959	14.3219	468
chr11	3399927	3400636	Peak_1627	179	.	6.27241	17.9959	14.3219	315
chr9	88420185	88420910	Peak_1628	179	.	6.19328	17.9959	14.3219	396
chr11	66610205	66610930	Peak_1629	179	.	4.11422	17.9453	14.2733	359
chr14	105486655	105487482	Peak_1630	179	.	4.11422	17.9453	14.2733	298
chr2	32502552	32503573	Peak_1631	178	.	4.49446	17.895	14.2233	628
chr9	126773192	126773832	Peak_1632	178	.	4.45478	17.895	14.2233	255
chr11	10472017	10472937	Peak_1633	178	.	5.18071	17.8367	14.166	517
chr12	108079338	108080091	Peak_1634	178	.	5.12576	17.8367	14.166	428
chr1	47133446	47134209	Peak_1635	178	.	5.23566	17.8367	14.166	446
chr19	38865253	38866009	Peak_1636	178	.	5.23566	17.8367	14.166	341
chr21	38738060	38738700	Peak_1637	178	.	5.23566	17.8367	14.166	341
chr7	44612814	44613621	Peak_1638	178	.	5.12576	17.8367	14.166	505
chrX	107334118	107334919	Peak_1639	178	.	5.12576	17.8367	14.166	521
chr9	131964946	131965626	Peak_1640	177	.	4.33306	17.7542	14.0859	334
chr14	102413865	102414772	Peak_1641	177	.	3.79933	17.7473	14.0805	612
chr15	102264148	102264798	Peak_1642	177	.	3.79933	17.7473	14.0805	237
chr1	11333091	11333844	Peak_1643	176	.	5.48118	17.6823	14.0165	349
chr17	42580236	42581028	Peak_1644	176	.	5.54399	17.6823	14.0165	291
chr3	52311842	52312635	Peak_1645	176	.	5.54399	17.6823	14.0165	514
chr4	48343484	48344393	Peak_1646	176	.	5.54399	17.6823	14.0165	355
chr1	150337006	150337988	Peak_1647	176	.	3.90138	17.6758	14.0109	312
chr9	140317105	140318483	Peak_1648	176	.	3.67928	17.6647	13.9999	448
chr10	35103094	35104011	Peak_1649	176	.	4.67212	17.6623	13.9977	376
chr11	47573711	47574678	Peak_1650	176	.	4.67212	17.6623	13.9977	737
chr12	123010946	123011751	Peak_1651	176	.	4.67212	17.6623	13.9977	343
chr2	241499536	241500706	Peak_1652	176	.	4.62816	17.6623	13.9977	877
chr3	69100852	69101795	Peak_1653	176	.	4.62816	17.6623	13.9977	289
chr1	25757260	25758094	Peak_1654	176	.	5.95509	17.6571	13.9943	482
chr8	73921019	73921681	Peak_1655	176	.	6.13579	17.6522	13.99	349
chr8	145653173	145654010	Peak_1656	176	.	4.18821	17.6084	13.9465	444
chr10	32635039	32636003	Peak_1657	175	.	4.75539	17.5971	13.9355	350
chr2	65454886	65455821	Peak_1658	175	.	4.70978	17.5971	13.9355	304
chr9	131789934	131790754	Peak_1659	175	.	3.52337	17.5701	13.909	397
chr1	16501897	16502834	Peak_1660	175	.	5.91565	17.5528	13.892	588
chr20	61846946	61848230	Peak_1661	175	.	3.37622	17.5494	13.8893	848
chr16	67880184	67881880	Peak_1662	175	.	4.79774	17.5394	13.8794	905
chr6	147524607	147525873	Peak_1663	175	.	4.75037	17.5394	13.8794	602
chr1	226249199	226250112	Peak_1664	175	.	4.13502	17.5373	13.878	491
chr17	20946644	20947229	Peak_1665	175	.	4.13502	17.5373	13.878	311
chr7	27212607	27213672	Peak_1666	175	.	4.13502	17.5373	13.878	641
chr11	71813937	71814449	Peak_1667	175	.	4.23989	17.5022	13.8436	249
chr13	20531897	20532738	Peak_1668	175	.	4.23989	17.5022	13.8436	438
chr19	33685338	33686334	Peak_1669	174	.	4.84352	17.4898	13.8316	354
chr21	36261011	36262728	Peak_1670	174	.	4.84352	17.4898	13.8316	486
chr3	178978668	178979300	Peak_1671	174	.	4.8928	17.4898	13.8316	335
chr1	6614040	6614880	Peak_1672	174	.	5.65159	17.4814	13.8235	503
chr19	14616431	14617143	Peak_1673	174	.	5.65159	17.4814	13.8235	278
chr13	31774377	31775106	Peak_1674	174	.	4.9445	17.4495	13.7922	373
chr19	54973960	54975135	Peak_1675	174	.	4.99586	17.4495	13.7922	791
chr2	99347738	99348281	Peak_1676	174	.	4.9445	17.4495	13.7922	289
chr19	34396363	34397095	Peak_1677	174	.	5.54571	17.4336	13.7767	299
chr6	107077181	107077942	Peak_1678	174	.	5.54571	17.4336	13.7767	444
chr7	105162200	105162886	Peak_1679	174	.	4.00812	17.4252	13.7689	352
chr16	619618	620482	Peak_1680	174	.	5.00074	17.4195	13.7633	375
chr6	28834273	28834877	Peak_1681	174	.	5.3888	17.4061	13.7508	300
chr6	33239331	33240349	Peak_1682	174	.	5.3888	17.4061	13.7508	631
chr2	223520474	223520989	Peak_1683	174	.	5.17429	17.4011	13.7463	257
chr13	45563323	45564230	Peak_1684	173	.	5.247	17.396	13.7418	584
chr17	57696031	57696940	Peak_1685	173	.	3.30914	17.3753	13.7216	521
chr2	238968923	238969541	Peak_1686	173	.	3.99667	17.3686	13.7149	347
chr2	242255365	242256100	Peak_1687	173	.	3.96527	17.3686	13.7149	243
chr3	169482175	169483336	Peak_1688	173	.	3.96527	17.3686	13.7149	477
chr1	228290495	228291201	Peak_1689	173	.	4.36728	17.3383	13.6855	252
chr5	1799187	1800021	Peak_1690	173	.	4.40725	17.3383	13.6855	414
chr21	38739214	38740336	Peak_1691	173	.	4.80046	17.336	13.6846	701
chr3	43732148	43733083	Peak_1692	173	.	4.80046	17.336	13.6846	255
chr5	6377833	6378752	Peak_1693	173	.	4.84931	17.336	13.6846	444
chr14	24036839	24037460	Peak_1694	173	.	5.15064	17.3251	13.6751	305
chr16	11890742	11891956	Peak_1695	173	.	4.35302	17.3007	13.6509	590
chr5	118323794	118324329	Peak_1696	172	.	3.84746	17.2393	13.5899	276
chr9	139838099	139839101	Peak_1697	172	.	3.81815	17.2393	13.5899	648
chr16	19125116	19125838	Peak_1698	172	.	4.33575	17.206	13.5571	413
chr7	105172388	105173094	Peak_1699	172	.	4.33575	17.206	13.5571	325
chr21	45719409	45720799	Peak_1700	171	.	3.74438	17.1429	13.4947	719
chr3	37033753	37034776	Peak_1701	171	.	3.7169	17.1429	13.4947	669
chr5	132387101	132388592	Peak_1702	171	.	3.74438	17.1429	13.4947	765
chr8	141520829	141521929	Peak_1703	171	.	3.7169	17.1429	13.4947	648
chr8	145159376	145160144	Peak_1704	171	.	3.74438	17.1429	13.4947	246
chr10	69608932	69609605	Peak_1705	171	.	6.11416	17.1211	13.4734	345
chr11	8985806	8986495	Peak_1706	171	.	6.11416	17.1211	13.4734	479
chr13	101240572	101241217	Peak_1707	171	.	5.95592	17.1211	13.4734	422
chr13	50365877	50366805	Peak_1708	171	.	5.95592	17.1211	13.4734	532
chr17	29233015	29233817	Peak_1709	171	.	5.95592	17.1211	13.4734	415
chr17	41150297	41151098	Peak_1710	171	.	6.03504	17.1211	13.4734	336
chr19	21511681	21512386	Peak_1711	171	.	6.11416	17.1211	13.4734	398
chr4	103940323	103940952	Peak_1712	171	.	5.95592	17.1211	13.4734	318
chr4	154143788	154144573	Peak_1713	171	.	6.11416	17.1211	13.4734	426
chrX	2418123	2419277	Peak_1714	171	.	6.03504	17.1211	13.4734	651
chr19	33792717	33794187	Peak_1715	171	.	4.39933	17.116	13.4707	576
chr2	15731846	15732584	Peak_1716	171	.	4.39933	17.116	13.4707	426
chr14	50318758	50319696	Peak_1717	170	.	4.18652	17.0858	13.4408	591
chr15	22833148	22834225	Peak_1718	170	.	4.18652	17.0858	13.4408	638
chr8	28269061	28270032	Peak_1719	170	.	4.22315	17.0858	13.4408	622
chr9	129567152	129567936	Peak_1720	170	.	4.18652	17.0858	13.4408	332
chr2	242254163	242254778	Peak_1721	170	.	5.28198	17.0829	13.4388	285
chr3	113464505	113465658	Peak_1722	170	.	5.3425	17.0829	13.4388	727
chr2	69968532	69969350	Peak_1723	170	.	3.6017	17.0741	13.4299	507
chr1	92906965	92907744	Peak_1724	170	.	5.01585	17.0669	13.423	367
chr4	40057346	40059112	Peak_1725	170	.	5.01585	17.0669	13.423	485
chr5	126564819	126565598	Peak_1726	170	.	5.01585	17.0669	13.423	288
chr16	88600514	88601177	Peak_1727	170	.	4.46733	17.031	13.3885	314
chr8	101321401	101322631	Peak_1728	170	.	3.52372	17.0287	13.3867	484
chr17	60142145	60143326	Peak_1729	170	.	3.26272	17.0235	13.3816	917
chr17	59486728	59487215	Peak_1730	170	.	1.8227	17.0185	13.3766	325
chr7	43965658	43966331	Peak_1731	170	.	5.64113	17.0057	13.3639	296
chr17	63118980	63120025	Peak_1732	170	.	3.29248	17.0029	13.3612	428
chr17	73719120	73720028	Peak_1733	169	.	3.25378	16.9905	13.3489	658
chr15	31283306	31284430	Peak_1734	169	.	4.54023	16.9515	13.3101	715
chr17	1388665	1389775	Peak_1735	169	.	4.58419	16.9515	13.3101	746
chr20	30697430	30698069	Peak_1736	169	.	4.54023	16.9515	13.3101	296
chr5	178487192	178487900	Peak_1737	169	.	4.54023	16.9515	13.3101	355
chr7	99678914	99679571	Peak_1738	169	.	4.54023	16.9515	13.3101	305
chr17	57697195	57698178	Peak_1739	169	.	3.21501	16.9357	13.2962	439
chr16	14723390	14724213	Peak_1740	168	.	4.03357	16.8899	13.2507	512
chr2	69663759	69664925	Peak_1741	168	.	4.03357	16.8899	13.2507	524
chr6	13614668	13615806	Peak_1742	168	.	4.03357	16.8899	13.2507	442
chr7	140396335	140397093	Peak_1743	168	.	4.03357	16.8899	13.2507	387
chr8	110346065	110347087	Peak_1744	168	.	4.06738	16.8899	13.2507	683
chr10	75910128	75910725	Peak_1745	168	.	5.35558	16.8787	13.2403	273
chr21	15077110	15077880	Peak_1746	168	.	5.29277	16.8787	13.2403	348
chr3	49027103	49028375	Peak_1747	168	.	5.35558	16.8787	13.2403	585
chr4	57844721	57845827	Peak_1748	168	.	5.41838	16.8787	13.2403	470
chr5	43313111	43313757	Peak_1749	168	.	5.41838	16.8787	13.2403	349
chr19	59069517	59070273	Peak_1750	168	.	4.57297	16.8782	13.2403	411
chr9	86595442	86596456	Peak_1751	168	.	4.61858	16.8782	13.2403	534
chr21	47744637	47745401	Peak_1752	168	.	4.13143	16.84	13.2037	408
chr16	87425897	87426715	Peak_1753	168	.	3.58538	16.83	13.1939	309
chr11	1330911	1331750	Peak_1754	168	.	5.73527	16.81	13.1744	457
chr1	22778456	22779223	Peak_1755	168	.	5.80855	16.81	13.1744	333
chr13	42845369	42846696	Peak_1756	167	.	5.73145	16.7999	13.1648	418
chr4	140476536	140477404	Peak_1757	167	.	5.80468	16.7999	13.1648	321
chr10	94351172	94351745	Peak_1758	167	.	5.90359	16.7891	13.1541	289
chr1	23345796	23346459	Peak_1759	167	.	5.90359	16.7891	13.1541	393
chr15	57210259	57211885	Peak_1760	167	.	5.82619	16.7891	13.1541	264
chr22	37955965	37956648	Peak_1761	167	.	5.98099	16.7891	13.1541	351
chr4	40632002	40632899	Peak_1762	167	.	5.90359	16.7891	13.1541	544
chr17	65240749	65241334	Peak_1763	167	.	2.96788	16.7815	13.1471	346
chr10	43891453	43893050	Peak_1764	167	.	3.90246	16.7398	13.106	543
chr1	149870972	149871904	Peak_1765	167	.	3.90246	16.7398	13.106	385
chr1	8013800	8014425	Peak_1766	167	.	5.69729	16.7092	13.0762	296
chr22	24951427	24952321	Peak_1767	167	.	4.89314	16.7026	13.0701	221
chr1	154599355	154600948	Peak_1768	166	.	4.94712	16.6619	13.0305	1281
chr11	85565400	85566294	Peak_1769	166	.	4.89351	16.6619	13.0305	447
chr13	50069995	50070597	Peak_1770	166	.	4.89351	16.6619	13.0305	256
chr4	147096795	147097609	Peak_1771	166	.	4.94712	16.6619	13.0305	252
chr6	116989486	116990022	Peak_1772	166	.	4.89351	16.6619	13.0305	254
chr10	70480907	70481541	Peak_1773	166	.	5.5142	16.6554	13.0246	331
chr11	76571480	76572269	Peak_1774	166	.	4.28735	16.6547	13.0243	504
chr5	176074117	176075034	Peak_1775	166	.	4.28735	16.6547	13.0243	463
chr8	77912473	77913219	Peak_1776	166	.	4.28735	16.6547	13.0243	284
chr15	38364916	38365527	Peak_1777	166	.	5.12945	16.6144	12.9864	290
chr3	50638405	50639072	Peak_1778	166	.	5.12945	16.6144	12.9864	346
chr11	61159669	61160391	Peak_1779	166	.	5.32706	16.6109	12.9835	307
chr14	81687592	81688355	Peak_1780	166	.	5.20357	16.6109	12.9835	341
chr16	699107	699781	Peak_1781	166	.	5.26531	16.6109	12.9835	381
chr2	230787133	230787772	Peak_1782	166	.	5.26531	16.6109	12.9835	290
chr3	3220823	3221709	Peak_1783	166	.	4.70277	16.6034	12.9767	363
chr5	67511007	67512003	Peak_1784	166	.	4.70277	16.6034	12.9767	314
chr5	10353135	10353761	Peak_1785	165	.	3.96045	16.5444	12.9194	387
chr9	140205369	140206326	Peak_1786	165	.	3.96045	16.5444	12.9194	740
chr1	153894957	153895509	Peak_1787	165	.	4.29607	16.526	12.9013	248
chr11	66313024	66313659	Peak_1788	164	.	3.54998	16.4904	12.8661	336
chr12	64173227	64174373	Peak_1789	164	.	3.57584	16.4904	12.8661	653
chr8	124780613	124781333	Peak_1790	164	.	3.27155	16.4627	12.8386	287
chr15	52587352	52588214	Peak_1791	164	.	3.30324	16.4459	12.8222	471
chr9	139009555	139011545	Peak_1792	164	.	3.38454	16.4434	12.8198	756
chr2	9346391	9347849	Peak_1793	164	.	4.35832	16.4292	12.8059	940
chr14	53257681	53258558	Peak_1794	164	.	4.14988	16.4259	12.8028	438
chr15	72564338	72565008	Peak_1795	164	.	4.11325	16.4259	12.8028	369
chr6	10426204	10427068	Peak_1796	164	.	4.14988	16.4259	12.8028	501
chr7	50517943	50518753	Peak_1797	164	.	4.11325	16.4259	12.8028	231
chr8	144821851	144823160	Peak_1798	164	.	4.11325	16.4259	12.8028	958
chr1	110577093	110577820	Peak_1799	163	.	5.26648	16.3787	12.7568	328
chr20	48729187	48730070	Peak_1800	163	.	2.92469	16.3764	12.7545	432
chr2	177502221	177502905	Peak_1801	163	.	4.38246	16.3372	12.7153	333
chr7	140773864	140774890	Peak_1802	163	.	4.38246	16.3372	12.7153	600
chr10	127407458	127408733	Peak_1803	163	.	4.9609	16.3077	12.6864	918
chr12	95867837	95868490	Peak_1804	163	.	4.90594	16.3077	12.6864	324
chr13	113862368	113863468	Peak_1805	163	.	4.90594	16.3077	12.6864	736
chr14	102227358	102227914	Peak_1806	163	.	4.9609	16.3077	12.6864	249
chr20	3026409	3027543	Peak_1807	163	.	4.90594	16.3077	12.6864	642
chr8	144815175	144815881	Peak_1808	163	.	3.81526	16.3052	12.6849	402
chr2	170440784	170441611	Peak_1809	163	.	4.01264	16.303	12.6828	427
chr17	58676998	58678298	Peak_1810	162	.	1.88148	16.2994	12.6793	889
chr9	140509339	140510392	Peak_1811	162	.	4.56144	16.2949	12.6749	528
chr11	122933346	122934467	Peak_1812	162	.	5.87679	16.2592	12.6394	341
chr15	49170247	49170827	Peak_1813	162	.	5.79767	16.2592	12.6394	225
chr21	33103672	33105096	Peak_1814	162	.	5.79767	16.2592	12.6394	468
chr4	13629214	13629847	Peak_1815	162	.	5.79767	16.2592	12.6394	348
chr4	171010826	171011461	Peak_1816	162	.	5.87679	16.2592	12.6394	338
chr4	2243104	2243968	Peak_1817	162	.	5.79767	16.2592	12.6394	331
chr9	32552185	32552797	Peak_1818	162	.	5.79767	16.2592	12.6394	343
chrX	57936029	57937028	Peak_1819	162	.	5.79767	16.2592	12.6394	295
chr1	1509845	1510787	Peak_1820	162	.	3.99975	16.2507	12.6328	333
chr1	153930584	153931323	Peak_1821	162	.	3.96593	16.2507	12.6328	347
chr1	223899761	223900811	Peak_1822	162	.	3.93211	16.2507	12.6328	479
chr16	2879687	2880631	Peak_1823	162	.	3.93211	16.2507	12.6328	527
chr9	128023716	128024643	Peak_1824	162	.	3.93211	16.2507	12.6328	453
chr9	137247470	137248959	Peak_1825	162	.	3.93211	16.2507	12.6328	406
chr11	63438965	63439607	Peak_1826	162	.	4.49627	16.2502	12.6328	259
chr1	24104660	24105426	Peak_1827	162	.	4.40834	16.2502	12.6328	386
chr17	48555726	48556389	Peak_1828	162	.	4.40834	16.2502	12.6328	343
chr17	79828345	79829025	Peak_1829	162	.	4.45231	16.2502	12.6328	325
chr3	101567668	101568685	Peak_1830	162	.	4.49627	16.2502	12.6328	412
chr7	42951042	42952037	Peak_1831	162	.	4.40834	16.2502	12.6328	309
chr9	96328701	96329428	Peak_1832	162	.	4.45231	16.2502	12.6328	367
chr5	180673269	180674214	Peak_1833	161	.	5.24796	16.139	12.5256	334
chr15	101459282	101460001	Peak_1834	161	.	3.80826	16.1189	12.5056	289
chr15	72522180	72522782	Peak_1835	161	.	3.83966	16.1189	12.5056	317
chr9	140134639	140135419	Peak_1836	161	.	3.80826	16.1189	12.5056	386
chr14	101925432	101926111	Peak_1837	160	.	4.56088	16.094	12.4814	385
chr16	68297819	68298804	Peak_1838	160	.	4.60825	16.094	12.4814	498
chr19	38781185	38781861	Peak_1839	160	.	5.16716	16.0864	12.4743	388
chr3	71631514	71632895	Peak_1840	160	.	5.22997	16.0864	12.4743	622
chr4	40751694	40752430	Peak_1841	160	.	5.22997	16.0864	12.4743	323
chr6	31508989	31510303	Peak_1842	160	.	5.22997	16.0864	12.4743	566
chr9	37422536	37423342	Peak_1843	160	.	5.22997	16.0864	12.4743	382
chrX	119005533	119006218	Peak_1844	160	.	5.22997	16.0864	12.4743	407
chr12	69753415	69754099	Peak_1845	160	.	4.10845	16.0725	12.4612	203
chr5	134240276	134241383	Peak_1846	160	.	4.07119	16.0725	12.4612	336
chr6	8435638	8436532	Peak_1847	160	.	4.14571	16.0725	12.4612	258
chr2	242041642	242042199	Peak_1848	160	.	5.02569	16.0686	12.4576	256
chr3	49448687	49449428	Peak_1849	160	.	4.64638	16.0261	12.4154	415
chr8	143484428	143485194	Peak_1850	160	.	3.67161	16.0226	12.4125	347
chr14	101052832	101053583	Peak_1851	159	.	4.24738	15.9803	12.3708	309
chr2	178128282	178129847	Peak_1852	159	.	4.24738	15.9803	12.3708	715
chr3	17783182	17784450	Peak_1853	159	.	4.20742	15.9803	12.3708	660
chr6	111196207	111197618	Peak_1854	159	.	4.24738	15.9803	12.3708	569
chr8	144699258	144700661	Peak_1855	159	.	4.24738	15.9803	12.3708	690
chr10	88854903	88855614	Peak_1856	159	.	5.662	15.9754	12.367	300
chr12	96252525	96253196	Peak_1857	159	.	5.51546	15.9754	12.367	275
chr1	47799319	47800523	Peak_1858	159	.	5.58873	15.9754	12.367	499
chr17	43238108	43239032	Peak_1859	159	.	5.51546	15.9754	12.367	392
chr7	1066788	1068037	Peak_1860	159	.	3.66184	15.9715	12.3638	913
chr8	52810736	52812656	Peak_1861	159	.	4.73907	15.966	12.3585	468
chr1	201122905	201123625	Peak_1862	159	.	3.60699	15.9559	12.3491	346
chr9	139378338	139379204	Peak_1863	159	.	3.57952	15.9559	12.3491	379
chr1	213188465	213189165	Peak_1864	159	.	5.67139	15.9387	12.3324	375
chr4	110480574	110481242	Peak_1865	159	.	5.74879	15.9387	12.3324	314
chr5	137673078	137674301	Peak_1866	159	.	5.47632	15.9252	12.3193	330
chr9	135545121	135546326	Peak_1867	159	.	4.8399	15.9148	12.309	867
chr11	68080172	68080930	Peak_1868	159	.	3.89404	15.9138	12.3086	338
chr17	62915038	62915767	Peak_1869	159	.	3.89404	15.9138	12.3086	424
chr7	92076533	92077244	Peak_1870	158	.	3.42603	15.8929	12.2883	389
chr12	2904058	2905149	Peak_1871	158	.	4.65392	15.8809	12.2766	420
chr2	264908	265524	Peak_1872	158	.	4.65392	15.8809	12.2766	307
chr4	77227210	77228150	Peak_1873	158	.	4.60507	15.8809	12.2766	297
chr5	43602810	43603902	Peak_1874	158	.	4.60507	15.8809	12.2766	568
chr9	80850864	80851685	Peak_1875	158	.	4.65392	15.8809	12.2766	236
chr11	30344495	30345265	Peak_1876	158	.	5.62451	15.878	12.2756	245
chr11	30606684	30607350	Peak_1877	158	.	5.55172	15.878	12.2756	330
chr5	114598120	114598957	Peak_1878	158	.	5.71259	15.8473	12.2465	346
chr1	36915690	36916297	Peak_1879	158	.	5.07068	15.8439	12.2432	351
chr4	53525107	53526021	Peak_1880	158	.	4.95313	15.8439	12.2432	584
chr17	26554470	26555101	Peak_1881	158	.	5.44551	15.8416	12.2416	296
chr8	17104367	17104993	Peak_1882	158	.	5.37682	15.8416	12.2416	295
chr16	81069389	81070198	Peak_1883	158	.	3.72169	15.8324	12.2329	455
chr8	97657032	97657808	Peak_1884	158	.	4.69954	15.8317	12.2322	448
chr19	18432998	18433704	Peak_1885	158	.	5.08008	15.8273	12.2278	340
chr1	20834205	20834966	Peak_1886	158	.	5.28558	15.8257	12.2268	356
chr12	104323005	104323704	Peak_1887	158	.	5.28558	15.8257	12.2268	314
chr20	33872067	33872701	Peak_1888	158	.	5.22055	15.8257	12.2268	228
chr11	64109750	64110291	Peak_1889	157	.	4.03998	15.7746	12.1763	229
chr3	125313494	125314437	Peak_1890	157	.	4.07661	15.7746	12.1763	701
chr3	23851692	23852799	Peak_1891	157	.	4.03998	15.7746	12.1763	637
chr7	148822771	148824249	Peak_1892	157	.	4.07661	15.7746	12.1763	464
chr9	132222690	132223626	Peak_1893	157	.	4.00334	15.7746	12.1763	245
chrX	150066641	150067293	Peak_1894	157	.	4.03998	15.7746	12.1763	325
chr10	3214149	3215060	Peak_1895	156	.	4.34003	15.6528	12.0568	605
chr14	67826951	67827523	Peak_1896	156	.	4.25516	15.6528	12.0568	276
chr16	21963900	21965155	Peak_1897	156	.	4.25516	15.6528	12.0568	300
chr7	1028090	1028665	Peak_1898	156	.	4.25516	15.6528	12.0568	257
chr7	107204078	107204849	Peak_1899	156	.	4.34003	15.6528	12.0568	513
chr11	68671163	68671712	Peak_1900	156	.	3.8983	15.6198	12.0244	226
chr1	181081437	181082021	Peak_1901	156	.	3.8983	15.6198	12.0244	232
chr1	204042163	204042858	Peak_1902	156	.	3.86448	15.6198	12.0244	321
chr15	93198442	93199140	Peak_1903	156	.	3.86448	15.6198	12.0244	356
chr2	232826006	232826895	Peak_1904	156	.	3.86448	15.6198	12.0244	434
chr3	14988473	14989089	Peak_1905	156	.	3.8983	15.6198	12.0244	349
chr11	22646545	22647634	Peak_1906	155	.	4.79604	15.5595	11.9651	505
chr20	43588559	43589274	Peak_1907	155	.	4.79604	15.5595	11.9651	302
chr2	228189765	228190486	Peak_1908	155	.	4.79604	15.5595	11.9651	352
chr3	186501395	186502318	Peak_1909	155	.	4.85099	15.5595	11.9651	589
chr9	72873404	72874468	Peak_1910	155	.	4.79604	15.5595	11.9651	720
chr17	76164538	76165454	Peak_1911	155	.	4.32042	15.5586	11.9651	349
chr20	32951174	32951969	Peak_1912	155	.	4.36438	15.5586	11.9651	290
chr2	216973754	216974442	Peak_1913	155	.	4.32042	15.5586	11.9651	279
chr2	70368919	70369692	Peak_1914	155	.	4.32042	15.5586	11.9651	465
chr7	91570113	91570833	Peak_1915	155	.	4.36438	15.5586	11.9651	318
chr8	142010289	142012116	Peak_1916	155	.	4.36438	15.5586	11.9651	329
chr12	124086166	124086823	Peak_1917	155	.	5.49353	15.5347	11.9435	309
chr14	74058460	74059226	Peak_1918	155	.	3.77686	15.506	11.9151	453
chr10	81838304	81839098	Peak_1919	154	.	4.43616	15.4696	11.8793	352
chr16	87799299	87800032	Peak_1920	154	.	4.43616	15.4696	11.8793	386
chr17	7382379	7383485	Peak_1921	154	.	4.43616	15.4696	11.8793	493
chr8	86132115	86132615	Peak_1922	154	.	4.39055	15.4696	11.8793	282
chr20	46413501	46414865	Peak_1923	154	.	2.09457	15.4603	11.8704	1103
chr8	100024789	100025626	Peak_1924	154	.	3.61299	15.4258	11.8362	382
chr11	105948456	105949178	Peak_1925	154	.	5.63943	15.4105	11.8217	307
chr17	37356480	37357193	Peak_1926	154	.	5.63943	15.4105	11.8217	359
chr17	38278287	38279140	Peak_1927	154	.	5.71855	15.4105	11.8217	478
chr22	19842460	19843495	Peak_1928	154	.	5.63943	15.4105	11.8217	582
chr22	41417556	41418676	Peak_1929	154	.	5.71855	15.4105	11.8217	775
chr10	134261113	134261768	Peak_1930	153	.	4.46613	15.3864	11.7994	393
chr1	154975055	154975580	Peak_1931	153	.	4.46613	15.3864	11.7994	265
chr12	132434419	132435177	Peak_1932	153	.	4.41875	15.3864	11.7994	270
chr16	12897087	12897737	Peak_1933	153	.	4.5135	15.3864	11.7994	363
chr1	62207603	62208963	Peak_1934	153	.	4.5135	15.3864	11.7994	1083
chr17	2414819	2415401	Peak_1935	153	.	4.5135	15.3864	11.7994	246
chr19	48866314	48866953	Peak_1936	153	.	4.46613	15.3864	11.7994	313
chr2	233561973	233562674	Peak_1937	153	.	3.52456	15.3735	11.7873	269
chr9	140500098	140501625	Peak_1938	153	.	3.55204	15.3735	11.7873	314
chr17	49197259	49198210	Peak_1939	153	.	3.23729	15.3657	11.78	604
chr7	100472266	100473202	Peak_1940	153	.	3.44654	15.3445	11.7589	301
chr7	32535005	32535556	Peak_1941	153	.	3.44654	15.3445	11.7589	298
chr17	47112973	47113692	Peak_1942	153	.	3.37718	15.3354	11.7501	413
chr3	176913955	176915176	Peak_1943	153	.	5.50457	15.3155	11.7304	309
chr2	10261736	10262848	Peak_1944	153	.	4.16745	15.315	11.73	643
chr7	138145037	138145734	Peak_1945	153	.	4.16745	15.315	11.73	322
chr9	127962641	127963414	Peak_1946	153	.	4.12748	15.315	11.73	448
chr9	36400605	36401622	Peak_1947	153	.	4.12748	15.315	11.73	401
chr10	135121916	135122783	Peak_1948	153	.	4.5478	15.3096	11.7256	508
chr1	110949942	110950716	Peak_1949	153	.	4.5478	15.3096	11.7256	330
chr1	117664103	117665525	Peak_1950	153	.	4.5478	15.3096	11.7256	539
chr19	44439046	44439703	Peak_1951	153	.	4.49852	15.3096	11.7256	314
chr2	97303608	97304065	Peak_1952	153	.	4.5478	15.3096	11.7256	231
chr3	141943702	141944620	Peak_1953	153	.	4.49852	15.3096	11.7256	289
chr1	156710272	156711098	Peak_1954	153	.	5.10436	15.306	11.7224	519
chr11	62388895	62389485	Peak_1955	153	.	5.04156	15.306	11.7224	273
chr2	102314052	102314791	Peak_1956	153	.	5.10436	15.306	11.7224	454
chr7	151216096	151216762	Peak_1957	153	.	5.04156	15.306	11.7224	351
chr8	42995421	42996600	Peak_1958	153	.	5.10436	15.306	11.7224	346
chr9	34125791	34126735	Peak_1959	153	.	5.10436	15.306	11.7224	587
chr14	73603101	73603750	Peak_1960	152	.	4.63635	15.2401	11.6578	294
chr8	125486445	125487642	Peak_1961	152	.	3.5256	15.2306	11.649	749
chr10	121631669	121632477	Peak_1962	151	.	4.09768	15.1931	11.6117	502
chr7	149535452	149535921	Peak_1963	151	.	4.09768	15.1931	11.6117	198
chr10	118502033	118502737	Peak_1964	151	.	4.73267	15.1787	11.5977	423
chrX	16730157	16731061	Peak_1965	151	.	4.67906	15.1787	11.5977	348
chr10	121411122	121411953	Peak_1966	151	.	4.50738	15.1687	11.5883	488
chr12	6961197	6961948	Peak_1967	151	.	4.50738	15.1687	11.5883	311
chr16	278825	279527	Peak_1968	151	.	4.45853	15.1687	11.5883	390
chr4	121843156	121844319	Peak_1969	151	.	4.50738	15.1687	11.5883	416
chr7	64466477	64467354	Peak_1970	151	.	4.50738	15.1687	11.5883	398
chr1	160175216	160175812	Peak_1971	151	.	5.36892	15.1537	11.5746	295
chr1	44820443	44821072	Peak_1972	151	.	5.44219	15.1537	11.5746	317
chr6	157098999	157100965	Peak_1973	151	.	5.44219	15.1537	11.5746	1638
chr6	84937288	84937884	Peak_1974	151	.	5.36892	15.1537	11.5746	280
chr9	71650555	71651187	Peak_1975	151	.	5.44219	15.1537	11.5746	275
chr12	95611570	95612243	Peak_1976	151	.	3.93007	15.1322	11.5538	265
chr16	68268771	68269781	Peak_1977	151	.	3.93007	15.1322	11.5538	399
chr16	69600231	69601177	Peak_1978	151	.	3.93007	15.1322	11.5538	351
chr19	35759784	35760669	Peak_1979	151	.	3.93007	15.1322	11.5538	382
chr2	95824694	95825357	Peak_1980	151	.	4.78176	15.1266	11.5492	317
chr6	32938967	32939546	Peak_1981	151	.	4.72569	15.1266	11.5492	350
chr1	151735364	151736244	Peak_1982	151	.	3.40646	15.1165	11.5398	397
chr3	42641791	42642797	Peak_1983	151	.	5.51659	15.1016	11.525	558
chr8	116679421	116680321	Peak_1984	150	.	4.83558	15.0849	11.5087	469
chr3	39424854	39426065	Peak_1985	150	.	4.15327	15.0836	11.5078	435
chr1	35734028	35734932	Peak_1986	150	.	5.40615	15.0597	11.4845	337
chr4	103747878	103748828	Peak_1987	150	.	4.95659	15.0554	11.4808	700
chrX	16888888	16889630	Peak_1988	150	.	5.23944	15.0402	11.4662	279
chr17	21116691	21118119	Peak_1989	149	.	3.83066	14.9974	11.4249	413
chr14	35804586	35805280	Peak_1990	149	.	4.79381	14.9886	11.4169	298
chr7	100964597	100965704	Peak_1991	149	.	4.21272	14.9781	11.4065	250
chr8	127570066	127570542	Peak_1992	149	.	3.23077	14.9629	11.3917	237
chr5	36151992	36152772	Peak_1993	149	.	5.14182	14.9601	11.3889	498
chr17	77774590	77775411	Peak_1994	149	.	3.66171	14.9526	11.3815	275
chr7	984751	985436	Peak_1995	149	.	3.66171	14.9526	11.3815	402
chr14	55368986	55369527	Peak_1996	149	.	3.91451	14.905	11.3342	294
chr2	3622413	3623355	Peak_1997	149	.	3.91451	14.905	11.3342	624
chr14	103523239	103523971	Peak_1998	149	.	3.71405	14.9013	11.3307	373
chr20	54967539	54968292	Peak_1999	149	.	3.71405	14.9013	11.3307	359
[truncated: 709 more rows]
