# Supplementary material for: ZFX acts as a transcriptional activator in multiple types of human tumors by binding downstream from transcription start sites at the majority of CpG island promoters
Source: Genome Res. 2018 Mar;28(3):310–20. doi: 10.1101/gr.228809.117 (PMC5848610; doi:10.1101/gr.228809.117)
Supplement: Supplemental Material [file supp_gr.228809.117_Supplemental_Table_S6.xlsx]

## Sheet: Table S6A
Supplemental Table S6A. Nucleosome depleted regions in C42B
chr1	14860	15000	C42B_NDR_1	3.78419	*
chr1	16340	16500	C42B_NDR_2	5.08856	*
chr1	521480	521680	C42B_NDR_3	7.11019	*
chr1	564580	564840	C42B_NDR_4	11.4511	*
chr1	565040	566240	C42B_NDR_5	24.4785	*
chr1	566260	567880	C42B_NDR_6	55.7787	*
chr1	567940	568940	C42B_NDR_7	48.0821	*
chr1	569220	570340	C42B_NDR_8	34.6159	*
chr1	592180	592360	C42B_NDR_9	7.19372	*
chr1	713940	714120	C42B_NDR_10	6.61082	*
chr1	714180	714340	C42B_NDR_11	5.00766	*
chr1	752680	752880	C42B_NDR_12	8.88731	*
chr1	785840	785980	C42B_NDR_13	4.19963	*
chr1	802980	803140	C42B_NDR_14	4.41921	*
chr1	805160	805440	C42B_NDR_15	16.0452	*
chr1	813140	813280	C42B_NDR_16	4.34619	*
chr1	852000	852240	C42B_NDR_17	9.45589	*
chr1	856500	856700	C42B_NDR_18	7.0583	*
chr1	859160	859360	C42B_NDR_19	9.43505	*
chr1	859420	859560	C42B_NDR_20	4.94435	*
chr1	859660	859800	C42B_NDR_21	5.48952	*
chr1	859880	860040	C42B_NDR_22	4.56701	*
chr1	860160	860380	C42B_NDR_23	8.62989	*
chr1	865680	865860	C42B_NDR_24	7.75605	*
chr1	868480	868760	C42B_NDR_25	13.5486	*
chr1	869160	869340	C42B_NDR_26	5.74815	*
chr1	873620	873760	C42B_NDR_27	5.1728	*
chr1	877040	877220	C42B_NDR_28	6.52981	*
chr1	877300	877440	C42B_NDR_29	4.46494	*
chr1	879800	879980	C42B_NDR_30	4.6643	*
chr1	894540	894900	C42B_NDR_31	10.449	*
chr1	896800	896940	C42B_NDR_32	4.82607	*
chr1	898040	898200	C42B_NDR_33	4.27412	*
chr1	902320	902500	C42B_NDR_34	8.58171	*
chr1	902560	902700	C42B_NDR_35	4.13393	*
chr1	911560	911740	C42B_NDR_36	8.61319	*
chr1	919280	919420	C42B_NDR_37	4.28284	*
chr1	935460	935680	C42B_NDR_38	9.28412	*
chr1	935740	935940	C42B_NDR_39	9.68557	*
chr1	936220	936380	C42B_NDR_40	6.48415	*
chr1	940680	940840	C42B_NDR_41	4.60784	*
chr1	948820	949160	C42B_NDR_42	7.41551	*
chr1	949760	949960	C42B_NDR_43	6.69975	*
chr1	955380	955520	C42B_NDR_44	4.83558	*
chr1	962200	962360	C42B_NDR_45	5.17853	*
chr1	976140	976480	C42B_NDR_46	12.9048	*
chr1	977440	977600	C42B_NDR_47	5.13737	*
chr1	994940	995200	C42B_NDR_48	10.6776	*
chr1	999280	999480	C42B_NDR_49	11.8101	*
chr1	1002780	1002920	C42B_NDR_50	4.7206	*
chr1	1003220	1003420	C42B_NDR_51	6.74051	*
chr1	1003920	1004200	C42B_NDR_52	6.34866	*
chr1	1004720	1004880	C42B_NDR_53	7.34614	*
chr1	1009400	1009600	C42B_NDR_54	7.74605	*
chr1	1015160	1015300	C42B_NDR_55	4.98103	*
chr1	1015380	1015520	C42B_NDR_56	5.16183	*
chr1	1021460	1021680	C42B_NDR_57	7.07183	*
chr1	1022760	1022900	C42B_NDR_58	5.12385	*
chr1	1025800	1025960	C42B_NDR_59	5.55003	*
chr1	1051460	1051840	C42B_NDR_60	7.24471	*
chr1	1051960	1052120	C42B_NDR_61	5.41137	*
chr1	1057620	1057820	C42B_NDR_62	9.78508	*
chr1	1060840	1061000	C42B_NDR_63	7.0106	*
chr1	1068060	1068240	C42B_NDR_64	8.38279	*
chr1	1070720	1070900	C42B_NDR_65	4.58496	*
chr1	1071620	1071760	C42B_NDR_66	4.50263	*
chr1	1078280	1078440	C42B_NDR_67	5.32831	*
chr1	1079900	1080120	C42B_NDR_68	9.13439	*
chr1	1089300	1089560	C42B_NDR_69	9.26776	*
chr1	1092760	1092980	C42B_NDR_70	7.3927	*
chr1	1098000	1098280	C42B_NDR_71	8.87374	*
chr1	1098320	1098460	C42B_NDR_72	5.36682	*
chr1	1099980	1100160	C42B_NDR_73	6.13494	*
chr1	1109000	1109140	C42B_NDR_74	4.28732	*
chr1	1117640	1117800	C42B_NDR_75	4.708	*
chr1	1141860	1142060	C42B_NDR_76	7.26844	*
chr1	1144640	1144780	C42B_NDR_77	4.43997	*
chr1	1166200	1166340	C42B_NDR_78	5.095	*
chr1	1167260	1167760	C42B_NDR_79	11.599	*
chr1	1168480	1168620	C42B_NDR_80	5.00198	*
chr1	1176380	1176560	C42B_NDR_81	6.4406	*
chr1	1177060	1177200	C42B_NDR_82	3.39982	*
chr1	1177240	1177380	C42B_NDR_83	3.55667	*
chr1	1178760	1178900	C42B_NDR_84	4.39951	*
chr1	1182500	1182680	C42B_NDR_85	7.62336	*
chr1	1189800	1189940	C42B_NDR_86	4.48876	*
chr1	1207960	1208220	C42B_NDR_87	7.82325	*
chr1	1209140	1209320	C42B_NDR_88	7.3013	*
chr1	1219320	1219460	C42B_NDR_89	4.43959	*
chr1	1225580	1225800	C42B_NDR_90	6.68981	*
chr1	1234920	1235060	C42B_NDR_91	4.28444	*
chr1	1243340	1243480	C42B_NDR_92	5.17461	*
chr1	1243720	1244100	C42B_NDR_93	10.903	*
chr1	1245180	1245360	C42B_NDR_94	5.59201	*
chr1	1253660	1253920	C42B_NDR_95	7.15928	*
chr1	1260020	1260300	C42B_NDR_96	12.0403	*
chr1	1262060	1262200	C42B_NDR_97	3.99641	*
chr1	1269100	1269280	C42B_NDR_98	5.60683	*
chr1	1274040	1274200	C42B_NDR_99	5.51432	*
chr1	1279440	1279700	C42B_NDR_100	7.3234	*
chr1	1280020	1280200	C42B_NDR_101	7.06038	*
chr1	1283320	1283600	C42B_NDR_102	16.4738	*
chr1	1294720	1294860	C42B_NDR_103	4.40973	*
chr1	1298520	1298700	C42B_NDR_104	6.55014	*
chr1	1307340	1307480	C42B_NDR_105	4.19294	*
chr1	1310500	1311100	C42B_NDR_106	10.2211	*
chr1	1334560	1335020	C42B_NDR_107	15.0807	*
chr1	1337440	1337620	C42B_NDR_108	6.06325	*
chr1	1342540	1342820	C42B_NDR_109	8.34224	*
chr1	1355520	1355700	C42B_NDR_110	7.01472	*
chr1	1355720	1355880	C42B_NDR_111	6.25239	*
chr1	1361620	1361780	C42B_NDR_112	4.53154	*
chr1	1365660	1365800	C42B_NDR_113	3.92754	*
chr1	1368640	1368900	C42B_NDR_114	9.0493	*
chr1	1376320	1376520	C42B_NDR_115	7.08089	*
chr1	1377460	1377600	C42B_NDR_116	5.44404	*
chr1	1378120	1378280	C42B_NDR_117	5.46916	*
chr1	1386600	1386760	C42B_NDR_118	3.75637	*
chr1	1389080	1389220	C42B_NDR_119	4.74024	*
chr1	1390880	1391020	C42B_NDR_120	4.47272	*
chr1	1392340	1392480	C42B_NDR_121	4.93909	*
chr1	1407040	1407240	C42B_NDR_122	6.14708	*
chr1	1417300	1417440	C42B_NDR_123	5.04293	*
chr1	1447340	1447600	C42B_NDR_124	7.68747	*
chr1	1448420	1448580	C42B_NDR_125	5.15105	*
chr1	1458720	1458860	C42B_NDR_126	4.36697	*
chr1	1461860	1462000	C42B_NDR_127	4.43778	*
chr1	1462540	1462680	C42B_NDR_128	4.46543	*
chr1	1510160	1510460	C42B_NDR_129	10.3849	*
chr1	1519580	1519740	C42B_NDR_130	4.5605	*
chr1	1530060	1530240	C42B_NDR_131	6.4	*
chr1	1533780	1533940	C42B_NDR_132	5.37818	*
chr1	1535060	1535240	C42B_NDR_133	9.24278	*
chr1	1550560	1550840	C42B_NDR_134	6.93883	*
chr1	1551100	1551260	C42B_NDR_135	7.02457	*
chr1	1551900	1552040	C42B_NDR_136	5.96335	*
chr1	1557580	1557780	C42B_NDR_137	8.9604	*
chr1	1561660	1561820	C42B_NDR_138	5.26264	*
chr1	1561840	1561980	C42B_NDR_139	3.59375	*
chr1	1563240	1563380	C42B_NDR_140	4.84842	*
chr1	1564400	1564620	C42B_NDR_141	5.20197	*
chr1	1590620	1590860	C42B_NDR_142	7.00949	*
chr1	1624160	1624380	C42B_NDR_143	5.85828	*
chr1	1655720	1656060	C42B_NDR_144	10.4701	*
chr1	1677800	1677960	C42B_NDR_145	4.26765	*
chr1	1690240	1690440	C42B_NDR_146	7.39242	*
chr1	1709780	1709980	C42B_NDR_147	9.46997	*
chr1	1710260	1710440	C42B_NDR_148	6.83916	*
chr1	1714000	1714200	C42B_NDR_149	8.54115	*
chr1	1714480	1714720	C42B_NDR_150	9.2203	*
chr1	1732840	1733020	C42B_NDR_151	5.06955	*
chr1	1765000	1765200	C42B_NDR_152	7.16843	*
chr1	1773240	1773420	C42B_NDR_153	6.36003	*
chr1	1790200	1790380	C42B_NDR_154	9.00977	*
chr1	1790800	1790940	C42B_NDR_155	4.82934	*
chr1	1804800	1804960	C42B_NDR_156	6.08131	*
chr1	1822060	1822200	C42B_NDR_157	3.95635	*
chr1	1822500	1822740	C42B_NDR_158	9.6211	*
chr1	1823100	1823240	C42B_NDR_159	5.02814	*
chr1	1826020	1826240	C42B_NDR_160	6.74767	*
chr1	1837180	1837320	C42B_NDR_161	4.56393	*
chr1	1837720	1837920	C42B_NDR_162	7.36042	*
chr1	1840700	1840940	C42B_NDR_163	14.7264	*
chr1	1847060	1847200	C42B_NDR_164	4.31025	*
chr1	1850220	1850440	C42B_NDR_165	8.28334	*
chr1	1850840	1851100	C42B_NDR_166	9.43616	*
chr1	1856640	1856800	C42B_NDR_167	5.00084	*
chr1	1857340	1857500	C42B_NDR_168	4.97757	*
chr1	1859440	1859580	C42B_NDR_169	4.66048	*
chr1	1859720	1859920	C42B_NDR_170	9.19814	*
chr1	1875760	1875940	C42B_NDR_171	8.4794	*
chr1	1891500	1891780	C42B_NDR_172	6.77017	*
chr1	1900520	1900700	C42B_NDR_173	6.24099	*
chr1	1905140	1905280	C42B_NDR_174	4.47984	*
chr1	1905440	1905600	C42B_NDR_175	6.28709	*
chr1	1905840	1905980	C42B_NDR_176	4.63726	*
chr1	1933400	1933600	C42B_NDR_177	11.1424	*
chr1	1964780	1964940	C42B_NDR_178	5.93705	*
chr1	1976340	1976560	C42B_NDR_179	5.41003	*
chr1	1978460	1978600	C42B_NDR_180	4.84234	*
chr1	1980920	1981160	C42B_NDR_181	10.431	*
chr1	1981540	1981780	C42B_NDR_182	9.08604	*
chr1	2005020	2005160	C42B_NDR_183	5.80354	*
chr1	2013480	2013900	C42B_NDR_184	11.4054	*
chr1	2064620	2064780	C42B_NDR_185	5.71984	*
chr1	2097160	2097300	C42B_NDR_186	3.5706	*
chr1	2106040	2106220	C42B_NDR_187	7.48101	*
chr1	2120860	2121320	C42B_NDR_188	10.4227	*
chr1	2121540	2121720	C42B_NDR_189	7.00964	*
chr1	2126080	2126340	C42B_NDR_190	8.64522	*
chr1	2126680	2126860	C42B_NDR_191	5.68769	*
chr1	2136580	2136720	C42B_NDR_192	6.3	*
chr1	2142440	2142600	C42B_NDR_193	4.73948	*
chr1	2144320	2144540	C42B_NDR_194	7.72501	*
chr1	2154040	2154200	C42B_NDR_195	6.73741	*
chr1	2158640	2158820	C42B_NDR_196	6.17252	*
chr1	2159000	2159180	C42B_NDR_197	6.32685	*
chr1	2159280	2159480	C42B_NDR_198	7.51379	*
chr1	2159620	2159800	C42B_NDR_199	6.21382	*
chr1	2160660	2160900	C42B_NDR_200	12.2977	*
chr1	2163060	2163260	C42B_NDR_201	7.20106	*
chr1	2179920	2180160	C42B_NDR_202	13.8525	*
chr1	2182120	2182360	C42B_NDR_203	6.18875	*
chr1	2183240	2183460	C42B_NDR_204	9.61527	*
chr1	2189760	2189920	C42B_NDR_205	6.01047	*
chr1	2220260	2220400	C42B_NDR_206	4.96757	*
chr1	2248120	2248300	C42B_NDR_207	4.89565	*
chr1	2250080	2250260	C42B_NDR_208	6.20533	*
chr1	2252240	2252400	C42B_NDR_209	5.34473	*
chr1	2273020	2273180	C42B_NDR_210	4.65146	*
chr1	2273440	2273580	C42B_NDR_211	5.51805	*
chr1	2274100	2274280	C42B_NDR_212	6.0102	*
chr1	2275700	2275840	C42B_NDR_213	6.17896	*
chr1	2281940	2282080	C42B_NDR_214	3.72782	*
chr1	2284280	2284420	C42B_NDR_215	5.66406	*
chr1	2313220	2313440	C42B_NDR_216	10.0149	*
chr1	2313860	2314000	C42B_NDR_217	3.95598	*
chr1	2323000	2323380	C42B_NDR_218	13.5431	*
chr1	2342360	2342660	C42B_NDR_219	14.1749	*
chr1	2343260	2343420	C42B_NDR_220	5.82017	*
chr1	2344020	2344160	C42B_NDR_221	5.45593	*
chr1	2346840	2347000	C42B_NDR_222	7.69044	*
chr1	2347820	2348020	C42B_NDR_223	8.00363	*
chr1	2363680	2363820	C42B_NDR_224	3.90563	*
chr1	2369420	2369800	C42B_NDR_225	8.23548	*
chr1	2373300	2373440	C42B_NDR_226	4.48621	*
chr1	2374100	2374240	C42B_NDR_227	3.70881	*
chr1	2378300	2378460	C42B_NDR_228	5.15493	*
chr1	2385500	2385660	C42B_NDR_229	5.60487	*
chr1	2387080	2387260	C42B_NDR_230	6.3878	*
chr1	2389400	2389540	C42B_NDR_231	4.05504	*
chr1	2391340	2391620	C42B_NDR_232	7.61765	*
chr1	2396580	2396760	C42B_NDR_233	5.42193	*
chr1	2400380	2400520	C42B_NDR_234	4.50972	*
chr1	2403300	2403460	C42B_NDR_235	5.69209	*
chr1	2403900	2404040	C42B_NDR_236	5.57009	*
chr1	2412220	2412380	C42B_NDR_237	4.98476	*
chr1	2412480	2412620	C42B_NDR_238	5.84736	*
chr1	2414300	2414440	C42B_NDR_239	4.48658	*
chr1	2425780	2425960	C42B_NDR_240	7.04971	*
chr1	2431280	2431420	C42B_NDR_241	3.66419	*
chr1	2431640	2431780	C42B_NDR_242	6.0574	*
chr1	2432740	2432880	C42B_NDR_243	5.19978	*
chr1	2436000	2436140	C42B_NDR_244	3.89861	*
chr1	2436400	2436540	C42B_NDR_245	5.53784	*
chr1	2440260	2440420	C42B_NDR_246	4.25067	*
chr1	2441700	2441860	C42B_NDR_247	5.8685	*
chr1	2457560	2457900	C42B_NDR_248	10.8138	*
chr1	2457920	2458100	C42B_NDR_249	6.8774	*
chr1	2459580	2459780	C42B_NDR_250	8.16934	*
chr1	2462260	2462420	C42B_NDR_251	4.85398	*
chr1	2462500	2462700	C42B_NDR_252	7.84363	*
chr1	2477500	2477680	C42B_NDR_253	6.52642	*
chr1	2478380	2478520	C42B_NDR_254	5.05657	*
chr1	2480320	2480480	C42B_NDR_255	5.2184	*
chr1	2487720	2487880	C42B_NDR_256	6.45967	*
chr1	2493840	2494000	C42B_NDR_257	4.42012	*
chr1	2495000	2495180	C42B_NDR_258	6.69811	*
chr1	2518040	2518220	C42B_NDR_259	4.88841	*
chr1	2526540	2526680	C42B_NDR_260	5.02947	*
chr1	2536500	2536640	C42B_NDR_261	3.93679	*
chr1	2562540	2562760	C42B_NDR_262	6.31334	*
chr1	2576300	2576440	C42B_NDR_263	4.2023	*
chr1	2632340	2632500	C42B_NDR_264	6.48759	*
chr1	2702060	2702240	C42B_NDR_265	8.31468	*
chr1	2722540	2722680	C42B_NDR_266	4.65066	*
chr1	2732400	2732580	C42B_NDR_267	6.69616	*
chr1	2738580	2738780	C42B_NDR_268	7.71126	*
chr1	2756700	2756840	C42B_NDR_269	3.74022	*
chr1	2766660	2766800	C42B_NDR_270	5.76022	*
chr1	2767660	2767800	C42B_NDR_271	4.5126	*
chr1	2782700	2782840	C42B_NDR_272	4.92696	*
chr1	2795580	2795740	C42B_NDR_273	5.41061	*
chr1	2796580	2796720	C42B_NDR_274	4.17317	*
chr1	2799560	2799720	C42B_NDR_275	5.21666	*
chr1	2822720	2823000	C42B_NDR_276	6.71757	*
chr1	2827880	2828080	C42B_NDR_277	8.42003	*
chr1	2838740	2838920	C42B_NDR_278	4.54904	*
chr1	2839940	2840080	C42B_NDR_279	4.74005	*
chr1	2842020	2842160	C42B_NDR_280	3.84217	*
chr1	2843420	2843560	C42B_NDR_281	5.01729	*
chr1	2866700	2866840	C42B_NDR_282	4.69945	*
chr1	2869160	2869340	C42B_NDR_283	6.72958	*
chr1	2882700	2882840	C42B_NDR_284	5.43587	*
chr1	2884960	2885120	C42B_NDR_285	4.71279	*
chr1	2885760	2885900	C42B_NDR_286	5.07615	*
chr1	2928540	2928700	C42B_NDR_287	4.78266	*
chr1	2930660	2930840	C42B_NDR_288	5.55357	*
chr1	2932680	2932840	C42B_NDR_289	4.175	*
chr1	2938000	2938160	C42B_NDR_290	4.88895	*
chr1	2948440	2948620	C42B_NDR_291	7.10382	*
chr1	2966560	2966720	C42B_NDR_292	4.20046	*
chr1	2980060	2980200	C42B_NDR_293	4.60218	*
chr1	2982880	2983040	C42B_NDR_294	5.21179	*
chr1	2983240	2983400	C42B_NDR_295	5.15649	*
chr1	2983620	2983760	C42B_NDR_296	4.24504	*
chr1	2985740	2985940	C42B_NDR_297	6.441	*
chr1	2990060	2990220	C42B_NDR_298	6.37205	*
chr1	3000040	3000180	C42B_NDR_299	4.63554	*
chr1	3018060	3018220	C42B_NDR_300	4.21747	*
chr1	3021920	3022060	C42B_NDR_301	4.81485	*
chr1	3023500	3023640	C42B_NDR_302	4.59906	*
chr1	3036480	3036640	C42B_NDR_303	4.56903	*
chr1	3043660	3043840	C42B_NDR_304	5.93206	*
chr1	3043980	3044180	C42B_NDR_305	9.36882	*
chr1	3051440	3051620	C42B_NDR_306	7.27318	*
chr1	3058200	3058340	C42B_NDR_307	3.3876	*
chr1	3069540	3069700	C42B_NDR_308	4.83545	*
chr1	3091480	3091740	C42B_NDR_309	9.23486	*
chr1	3107940	3108080	C42B_NDR_310	3.85991	*
chr1	3112760	3112920	C42B_NDR_311	5.84969	*
chr1	3125100	3125240	C42B_NDR_312	4.51343	*
chr1	3134860	3135000	C42B_NDR_313	4.19724	*
chr1	3135820	3136000	C42B_NDR_314	8.563	*
chr1	3142600	3142760	C42B_NDR_315	4.25621	*
chr1	3157940	3158080	C42B_NDR_316	3.75646	*
chr1	3169520	3169680	C42B_NDR_317	3.74738	*
chr1	3180500	3180640	C42B_NDR_318	4.56021	*
chr1	3193140	3193280	C42B_NDR_319	3.9275	*
chr1	3198500	3198640	C42B_NDR_320	4.03134	*
chr1	3201060	3201200	C42B_NDR_321	4.05883	*
chr1	3203680	3203840	C42B_NDR_322	4.21679	*
chr1	3204660	3204820	C42B_NDR_323	4.72767	*
chr1	3214460	3214600	C42B_NDR_324	5.16427	*
chr1	3221020	3221160	C42B_NDR_325	3.77102	*
chr1	3229880	3230020	C42B_NDR_326	4.36946	*
chr1	3230320	3230520	C42B_NDR_327	6.4575	*
chr1	3236540	3236680	C42B_NDR_328	6.27864	*
chr1	3238800	3238980	C42B_NDR_329	4.91637	*
chr1	3246500	3246660	C42B_NDR_330	4.11438	*
chr1	3246700	3246860	C42B_NDR_331	4.95969	*
chr1	3250560	3250740	C42B_NDR_332	6.7836	*
chr1	3264740	3264900	C42B_NDR_333	4.68182	*
chr1	3276260	3276420	C42B_NDR_334	5.18622	*
chr1	3294160	3294360	C42B_NDR_335	6.29291	*
chr1	3302300	3302480	C42B_NDR_336	5.30989	*
chr1	3305820	3305980	C42B_NDR_337	4.4891	*
chr1	3310140	3310380	C42B_NDR_338	7.63714	*
chr1	3326780	3327020	C42B_NDR_339	7.64319	*
chr1	3327780	3327920	C42B_NDR_340	4.38902	*
chr1	3341320	3341480	C42B_NDR_341	5.28876	*
chr1	3369800	3370020	C42B_NDR_342	6.98511	*
chr1	3370840	3371200	C42B_NDR_343	7.11542	*
chr1	3371260	3371400	C42B_NDR_344	4.71131	*
chr1	3376800	3376940	C42B_NDR_345	4.73098	*
chr1	3394240	3394380	C42B_NDR_346	5.11617	*
chr1	3396740	3396900	C42B_NDR_347	5.8274	*
chr1	3398020	3398160	C42B_NDR_348	4.8936	*
chr1	3398640	3398780	C42B_NDR_349	4.27924	*
chr1	3400140	3400280	C42B_NDR_350	4.14143	*
chr1	3400580	3400740	C42B_NDR_351	7.49916	*
chr1	3407900	3408080	C42B_NDR_352	4.97328	*
chr1	3408120	3408300	C42B_NDR_353	3.80745	*
chr1	3412920	3413080	C42B_NDR_354	5.73818	*
chr1	3415720	3415860	C42B_NDR_355	3.85916	*
chr1	3417680	3417840	C42B_NDR_356	5.52384	*
chr1	3418740	3418900	C42B_NDR_357	4.78028	*
chr1	3421920	3422080	C42B_NDR_358	5.88433	*
chr1	3431880	3432020	C42B_NDR_359	3.86225	*
chr1	3434160	3434300	C42B_NDR_360	4.34491	*
chr1	3440480	3440640	C42B_NDR_361	7.38008	*
chr1	3446000	3446300	C42B_NDR_362	13.2728	*
chr1	3447460	3447620	C42B_NDR_363	4.54158	*
chr1	3447880	3448060	C42B_NDR_364	10.6348	*
chr1	3464000	3464180	C42B_NDR_365	5.18328	*
chr1	3469740	3469900	C42B_NDR_366	5.17238	*
chr1	3470100	3470260	C42B_NDR_367	4.94384	*
chr1	3481900	3482040	C42B_NDR_368	5.31495	*
chr1	3498240	3498400	C42B_NDR_369	5.68252	*
chr1	3511180	3511320	C42B_NDR_370	3.535	*
chr1	3520060	3520200	C42B_NDR_371	4.90386	*
chr1	3523440	3523580	C42B_NDR_372	4.43774	*
chr1	3535620	3535800	C42B_NDR_373	5.93572	*
chr1	3540900	3541040	C42B_NDR_374	4.90273	*
chr1	3541260	3541640	C42B_NDR_375	9.06184	*
chr1	3566560	3566840	C42B_NDR_376	11.1673	*
chr1	3569700	3569840	C42B_NDR_377	4.24375	*
chr1	3585260	3585740	C42B_NDR_378	9.48804	*
chr1	3591840	3592000	C42B_NDR_379	4.97413	*
chr1	3595340	3595500	C42B_NDR_380	6.48417	*
chr1	3604000	3604140	C42B_NDR_381	4.46427	*
chr1	3607060	3607220	C42B_NDR_382	4.98891	*
chr1	3612520	3612680	C42B_NDR_383	6.56066	*
chr1	3621980	3622140	C42B_NDR_384	4.19973	*
chr1	3622200	3622340	C42B_NDR_385	4.31549	*
chr1	3625520	3625820	C42B_NDR_386	8.67504	*
chr1	3649820	3649960	C42B_NDR_387	3.85288	*
chr1	3663880	3664020	C42B_NDR_388	5.27627	*
chr1	3690100	3690240	C42B_NDR_389	3.89315	*
chr1	3697560	3697880	C42B_NDR_390	10.5543	*
chr1	3712960	3713260	C42B_NDR_391	8.76179	*
chr1	3718080	3718320	C42B_NDR_392	6.73924	*
chr1	3728440	3728580	C42B_NDR_393	4.4981	*
chr1	3748360	3748520	C42B_NDR_394	5.01854	*
chr1	3773700	3773840	C42B_NDR_395	4.22684	*
chr1	3773900	3774320	C42B_NDR_396	8.60966	*
chr1	3774860	3775040	C42B_NDR_397	8.1946	*
chr1	3809180	3809320	C42B_NDR_398	4.01043	*
chr1	3809420	3809600	C42B_NDR_399	5.92799	*
chr1	3816700	3816960	C42B_NDR_400	11.23	*
chr1	3817420	3817580	C42B_NDR_401	6.09939	*
chr1	3817880	3818140	C42B_NDR_402	15.6435	*
chr1	3844740	3844880	C42B_NDR_403	3.9457	*
chr1	4030960	4031100	C42B_NDR_404	4.53438	*
chr1	4054360	4054500	C42B_NDR_405	4.35366	*
chr1	4060080	4060240	C42B_NDR_406	5.60688	*
chr1	4061200	4061340	C42B_NDR_407	3.94149	*
chr1	4064220	4064400	C42B_NDR_408	5.4414	*
chr1	4211140	4211280	C42B_NDR_409	3.3977	*
chr1	4331380	4331520	C42B_NDR_410	4.172	*
chr1	4472080	4472220	C42B_NDR_411	4.1999	*
chr1	4587900	4588080	C42B_NDR_412	5.99663	*
chr1	4663580	4663760	C42B_NDR_413	5.91713	*
chr1	4674560	4674700	C42B_NDR_414	5.87091	*
chr1	4685200	4685360	C42B_NDR_415	6.78016	*
chr1	4700840	4700980	C42B_NDR_416	3.5558	*
chr1	4712700	4712860	C42B_NDR_417	5.99641	*
chr1	4749560	4749700	C42B_NDR_418	4.67726	*
chr1	4750520	4750660	C42B_NDR_419	4.10758	*
chr1	4771200	4771360	C42B_NDR_420	6.56647	*
chr1	4790160	4790540	C42B_NDR_421	10.5636	*
chr1	4805760	4805900	C42B_NDR_422	4.22592	*
chr1	4823260	4823420	C42B_NDR_423	5.0306	*
chr1	4838140	4838320	C42B_NDR_424	6.37336	*
chr1	5023120	5023280	C42B_NDR_425	4.99046	*
chr1	5159700	5159960	C42B_NDR_426	7.29257	*
chr1	5176140	5176300	C42B_NDR_427	3.94116	*
chr1	5179620	5179800	C42B_NDR_428	4.2425	*
chr1	5340000	5340160	C42B_NDR_429	4.24169	*
chr1	5464120	5464300	C42B_NDR_430	7.21647	*
chr1	5475640	5475800	C42B_NDR_431	4.01949	*
chr1	5544940	5545100	C42B_NDR_432	5.90334	*
chr1	5567560	5567700	C42B_NDR_433	4.0463	*
chr1	5574660	5574940	C42B_NDR_434	11.3056	*
chr1	5634100	5634240	C42B_NDR_435	4.24656	*
chr1	5658140	5658480	C42B_NDR_436	13.8278	*
chr1	5697280	5697540	C42B_NDR_437	7.65898	*
chr1	5717600	5717740	C42B_NDR_438	5.91342	*
chr1	5728160	5728340	C42B_NDR_439	8.24648	*
chr1	5765720	5765860	C42B_NDR_440	4.14603	*
chr1	5779360	5779540	C42B_NDR_441	6.70385	*
chr1	5785680	5785820	C42B_NDR_442	4.85484	*
chr1	5787320	5787640	C42B_NDR_443	7.50973	*
chr1	5788180	5788420	C42B_NDR_444	10.4792	*
chr1	5806920	5807080	C42B_NDR_445	6.50312	*
chr1	5809080	5809240	C42B_NDR_446	5.50678	*
chr1	5814520	5814680	C42B_NDR_447	4.49522	*
chr1	5814840	5815020	C42B_NDR_448	5.13501	*
chr1	5818600	5818780	C42B_NDR_449	4.45115	*
chr1	5824600	5824740	C42B_NDR_450	6.24681	*
chr1	5825200	5825360	C42B_NDR_451	4.92621	*
chr1	5839740	5839920	C42B_NDR_452	5.36403	*
chr1	5874400	5874560	C42B_NDR_453	6.49776	*
chr1	5898860	5899000	C42B_NDR_454	3.49579	*
chr1	5906300	5906460	C42B_NDR_455	4.83388	*
chr1	5907420	5907580	C42B_NDR_456	5.0988	*
chr1	5910720	5910860	C42B_NDR_457	3.93231	*
chr1	5963720	5964040	C42B_NDR_458	7.3442	*
chr1	5969900	5970040	C42B_NDR_459	4.86231	*
chr1	5975940	5976100	C42B_NDR_460	3.89443	*
chr1	6052240	6052380	C42B_NDR_461	4.31317	*
chr1	6052420	6052700	C42B_NDR_462	9.19805	*
chr1	6052840	6053020	C42B_NDR_463	6.48428	*
chr1	6062380	6062600	C42B_NDR_464	8.56318	*
chr1	6070500	6070640	C42B_NDR_465	3.98351	*
chr1	6086860	6087020	C42B_NDR_466	4.34218	*
chr1	6094560	6094780	C42B_NDR_467	8.75768	*
chr1	6100160	6100300	C42B_NDR_468	4.89896	*
chr1	6112600	6112780	C42B_NDR_469	8.62487	*
chr1	6118740	6119000	C42B_NDR_470	9.42083	*
chr1	6119140	6119380	C42B_NDR_471	7.4294	*
chr1	6119920	6120060	C42B_NDR_472	5.81111	*
chr1	6187600	6187760	C42B_NDR_473	5.43141	*
chr1	6187800	6188140	C42B_NDR_474	14.7185	*
chr1	6208740	6208980	C42B_NDR_475	6.70952	*
chr1	6218300	6218440	C42B_NDR_476	4.24921	*
chr1	6239580	6239860	C42B_NDR_477	6.49378	*
chr1	6259640	6259820	C42B_NDR_478	6.6452	*
chr1	6266200	6266440	C42B_NDR_479	16.775	*
chr1	6266860	6267020	C42B_NDR_480	5.04321	*
chr1	6272200	6272340	C42B_NDR_481	6.57114	*
chr1	6295920	6296220	C42B_NDR_482	23.5156	*
chr1	6302500	6302720	C42B_NDR_483	10.0701	*
chr1	6305440	6305620	C42B_NDR_484	7.28296	*
chr1	6306640	6306800	C42B_NDR_485	4.19844	*
chr1	6306840	6306980	C42B_NDR_486	4.10017	*
chr1	6308000	6308140	C42B_NDR_487	3.94802	*
chr1	6320080	6320240	C42B_NDR_488	5.55008	*
chr1	6321060	6321240	C42B_NDR_489	7.87185	*
chr1	6339820	6340000	C42B_NDR_490	5.87205	*
chr1	6340140	6340300	C42B_NDR_491	6.10651	*
chr1	6344820	6344980	C42B_NDR_492	4.52442	*
chr1	6355260	6355460	C42B_NDR_493	8.64117	*
chr1	6396480	6396640	C42B_NDR_494	4.69971	*
chr1	6403620	6403820	C42B_NDR_495	9.52878	*
chr1	6410600	6410800	C42B_NDR_496	6.96106	*
chr1	6411900	6412160	C42B_NDR_497	9.42267	*
chr1	6414000	6414160	C42B_NDR_498	5.59417	*
chr1	6419880	6420080	C42B_NDR_499	9.14886	*
chr1	6423240	6423440	C42B_NDR_500	8.09316	*
chr1	6434100	6434240	C42B_NDR_501	5.88506	*
chr1	6452980	6453160	C42B_NDR_502	6.07413	*
chr1	6456660	6456800	C42B_NDR_503	4.64681	*
chr1	6464780	6464940	C42B_NDR_504	4.96293	*
chr1	6472980	6473260	C42B_NDR_505	7.19777	*
chr1	6479900	6480080	C42B_NDR_506	9.04588	*
chr1	6483560	6483740	C42B_NDR_507	8.76638	*
chr1	6484760	6484920	C42B_NDR_508	5.66265	*
chr1	6488140	6488320	C42B_NDR_509	5.5753	*
chr1	6490940	6491100	C42B_NDR_510	5.10262	*
chr1	6491160	6491320	C42B_NDR_511	4.79944	*
chr1	6500420	6500640	C42B_NDR_512	10.1352	*
chr1	6515420	6515600	C42B_NDR_513	7.43927	*
chr1	6535740	6535880	C42B_NDR_514	4.98469	*
chr1	6543580	6543720	C42B_NDR_515	4.3614	*
chr1	6544520	6544660	C42B_NDR_516	4.5273	*
chr1	6546580	6546860	C42B_NDR_517	12.7895	*
chr1	6547800	6547960	C42B_NDR_518	6.73532	*
chr1	6550020	6550160	C42B_NDR_519	4.6779	*
chr1	6553960	6554140	C42B_NDR_520	6.10662	*
chr1	6554880	6555020	C42B_NDR_521	3.88835	*
chr1	6614500	6614660	C42B_NDR_522	4.87549	*
chr1	6639800	6640100	C42B_NDR_523	11.4204	*
chr1	6661240	6661420	C42B_NDR_524	5.53631	*
chr1	6662840	6663000	C42B_NDR_525	7.14772	*
chr1	6673360	6673820	C42B_NDR_526	14.521	*
chr1	6685220	6685360	C42B_NDR_527	5.55365	*
chr1	6685540	6685720	C42B_NDR_528	6.22317	*
chr1	6694740	6694920	C42B_NDR_529	6.10679	*
chr1	6761800	6761940	C42B_NDR_530	5.11679	*
chr1	6844280	6844440	C42B_NDR_531	4.62655	*
chr1	6844480	6844640	C42B_NDR_532	4.61018	*
chr1	6844740	6844900	C42B_NDR_533	5.59409	*
chr1	6844980	6845220	C42B_NDR_534	8.30215	*
chr1	6845440	6845600	C42B_NDR_535	4.95305	*
chr1	6845860	6846020	C42B_NDR_536	5.00432	*
chr1	6916140	6916280	C42B_NDR_537	4.37472	*
chr1	6950020	6950260	C42B_NDR_538	7.6094	*
chr1	6969820	6970000	C42B_NDR_539	6.78893	*
chr1	6970140	6970320	C42B_NDR_540	7.46331	*
chr1	7016640	7016780	C42B_NDR_541	3.86032	*
chr1	7020420	7020620	C42B_NDR_542	7.68738	*
chr1	7032880	7033020	C42B_NDR_543	4.33312	*
chr1	7058380	7058660	C42B_NDR_544	9.48939	*
chr1	7106480	7106660	C42B_NDR_545	8.02955	*
chr1	7130320	7130480	C42B_NDR_546	5.09837	*
chr1	7130540	7130780	C42B_NDR_547	7.66292	*
chr1	7135520	7135700	C42B_NDR_548	5.88461	*
chr1	7177740	7177880	C42B_NDR_549	5.27423	*
chr1	7206220	7206400	C42B_NDR_550	5.24289	*
chr1	7206580	7206720	C42B_NDR_551	3.62463	*
chr1	7210040	7210180	C42B_NDR_552	3.76836	*
chr1	7259260	7259400	C42B_NDR_553	4.58401	*
chr1	7325780	7325920	C42B_NDR_554	4.5743	*
chr1	7326200	7326340	C42B_NDR_555	4.47068	*
chr1	7359520	7359700	C42B_NDR_556	7.71836	*
chr1	7400100	7400360	C42B_NDR_557	8.75385	*
chr1	7432480	7432660	C42B_NDR_558	4.74647	*
chr1	7447580	7447760	C42B_NDR_559	5.57185	*
chr1	7495420	7495580	C42B_NDR_560	5.35559	*
chr1	7513040	7513220	C42B_NDR_561	5.72636	*
chr1	7579360	7579500	C42B_NDR_562	5.91758	*
chr1	7588100	7588260	C42B_NDR_563	5.46346	*
chr1	7621660	7621800	C42B_NDR_564	3.86628	*
chr1	7632980	7633140	C42B_NDR_565	7.59981	*
chr1	7644360	7644500	C42B_NDR_566	4.09036	*
chr1	7651800	7651960	C42B_NDR_567	5.41862	*
chr1	7655580	7655720	C42B_NDR_568	4.14508	*
chr1	7676460	7676600	C42B_NDR_569	5.08838	*
chr1	7693340	7693480	C42B_NDR_570	4.14333	*
chr1	7695740	7695900	C42B_NDR_571	4.44907	*
chr1	7709240	7709400	C42B_NDR_572	5.45831	*
chr1	7720800	7720960	C42B_NDR_573	4.99884	*
chr1	7727740	7727940	C42B_NDR_574	12.6669	*
chr1	7729580	7729760	C42B_NDR_575	4.92975	*
chr1	7740220	7740400	C42B_NDR_576	6.95071	*
chr1	7740460	7740600	C42B_NDR_577	7.51747	*
chr1	7741240	7741380	C42B_NDR_578	4.13249	*
chr1	7742420	7742560	C42B_NDR_579	3.36397	*
chr1	7744000	7744160	C42B_NDR_580	4.61576	*
chr1	7745340	7745520	C42B_NDR_581	6.13782	*
chr1	7764380	7764820	C42B_NDR_582	10.5053	*
chr1	7844000	7844180	C42B_NDR_583	7.31605	*
chr1	8002440	8002620	C42B_NDR_584	6.05863	*
chr1	8014220	8014440	C42B_NDR_585	7.81737	*
chr1	8021540	8021840	C42B_NDR_586	16.0613	*
chr1	8021880	8022080	C42B_NDR_587	9.54955	*
chr1	8030940	8031120	C42B_NDR_588	5.22046	*
chr1	8031300	8031480	C42B_NDR_589	5.00247	*
chr1	8042400	8042660	C42B_NDR_590	6.42739	*
chr1	8064980	8065120	C42B_NDR_591	4.75733	*
chr1	8066440	8066700	C42B_NDR_592	7.65106	*
chr1	8076000	8076160	C42B_NDR_593	6.29517	*
chr1	8085500	8085640	C42B_NDR_594	6.06693	*
chr1	8086220	8086420	C42B_NDR_595	10.0743	*
chr1	8086660	8086840	C42B_NDR_596	4.93454	*
chr1	8121340	8121660	C42B_NDR_597	13.3911	*
chr1	8229880	8230120	C42B_NDR_598	10.4469	*
chr1	8237000	8237140	C42B_NDR_599	3.79767	*
chr1	8242620	8242760	C42B_NDR_600	5.49093	*
chr1	8254740	8254880	C42B_NDR_601	5.18153	*
chr1	8269620	8269780	C42B_NDR_602	5.37176	*
chr1	8293400	8293540	C42B_NDR_603	3.76614	*
chr1	8304500	8304680	C42B_NDR_604	4.32239	*
chr1	8319200	8319480	C42B_NDR_605	10.3869	*
chr1	8319880	8320060	C42B_NDR_606	8.63541	*
chr1	8342300	8342440	C42B_NDR_607	5.07728	*
chr1	8359980	8360120	C42B_NDR_608	5.16667	*
chr1	8378080	8378240	C42B_NDR_609	6.59861	*
chr1	8403540	8403840	C42B_NDR_610	8.78827	*
chr1	8405680	8405820	C42B_NDR_611	4.33198	*
chr1	8433660	8433820	C42B_NDR_612	6.12229	*
chr1	8442900	8443040	C42B_NDR_613	5.09301	*
chr1	8472420	8472600	C42B_NDR_614	5.55158	*
chr1	8472900	8473060	C42B_NDR_615	3.7035	*
chr1	8482600	8482780	C42B_NDR_616	4.9348	*
chr1	8483420	8483560	C42B_NDR_617	4.14465	*
chr1	8484660	8484880	C42B_NDR_618	9.82133	*
chr1	8500620	8500760	C42B_NDR_619	4.40999	*
chr1	8509060	8509220	C42B_NDR_620	5.32235	*
chr1	8523500	8523700	C42B_NDR_621	6.55033	*
chr1	8539660	8539800	C42B_NDR_622	4.14093	*
chr1	8549980	8550220	C42B_NDR_623	5.78247	*
chr1	8585420	8585600	C42B_NDR_624	4.7155	*
chr1	8586080	8586320	C42B_NDR_625	11.0555	*
chr1	8631740	8631880	C42B_NDR_626	5.44755	*
chr1	8694440	8694620	C42B_NDR_627	6.09741	*
chr1	8704260	8704440	C42B_NDR_628	5.17992	*
chr1	8741400	8741560	C42B_NDR_629	4.6574	*
chr1	8761640	8761820	C42B_NDR_630	6.64694	*
chr1	8762240	8762480	C42B_NDR_631	11.8109	*
chr1	8763280	8763640	C42B_NDR_632	10.9457	*
chr1	8786640	8786800	C42B_NDR_633	4.46905	*
chr1	8806020	8806180	C42B_NDR_634	4.96027	*
chr1	8847540	8847680	C42B_NDR_635	4.11426	*
chr1	8876920	8877080	C42B_NDR_636	5.52896	*
chr1	8877660	8878120	C42B_NDR_637	7.48353	*
chr1	8904840	8905020	C42B_NDR_638	6.81942	*
chr1	8908960	8909180	C42B_NDR_639	13.778	*
chr1	8938700	8938840	C42B_NDR_640	6.05569	*
chr1	8939280	8939440	C42B_NDR_641	5.09585	*
chr1	8940160	8940340	C42B_NDR_642	5.3328	*
chr1	8940400	8940580	C42B_NDR_643	5.78814	*
chr1	8950040	8950300	C42B_NDR_644	11.8909	*
chr1	8954940	8955080	C42B_NDR_645	3.97212	*
chr1	8978220	8978460	C42B_NDR_646	8.89232	*
chr1	9017880	9018020	C42B_NDR_647	4.39231	*
chr1	9046260	9046600	C42B_NDR_648	12.5165	*
chr1	9125760	9125920	C42B_NDR_649	4.8582	*
chr1	9135360	9135520	C42B_NDR_650	4.62826	*
chr1	9161620	9161920	C42B_NDR_651	8.81347	*
chr1	9170880	9171120	C42B_NDR_652	8.20873	*
chr1	9171300	9171480	C42B_NDR_653	7.04012	*
chr1	9188880	9189040	C42B_NDR_654	5.76628	*
chr1	9189260	9189460	C42B_NDR_655	11.0749	*
chr1	9189560	9189800	C42B_NDR_656	9.67307	*
chr1	9205320	9205460	C42B_NDR_657	4.74487	*
chr1	9222040	9222200	C42B_NDR_658	5.00189	*
chr1	9224060	9224240	C42B_NDR_659	6.00547	*
chr1	9227720	9227880	C42B_NDR_660	4.09445	*
chr1	9242960	9243100	C42B_NDR_661	3.87907	*
chr1	9269560	9269700	C42B_NDR_662	4.9457	*
chr1	9295000	9295180	C42B_NDR_663	7.88887	*
chr1	9298700	9298880	C42B_NDR_664	7.71388	*
chr1	9302740	9302980	C42B_NDR_665	15.6517	*
chr1	9304720	9304940	C42B_NDR_666	8.11107	*
chr1	9312100	9312260	C42B_NDR_667	6.2625	*
chr1	9330580	9330840	C42B_NDR_668	10.4226	*
chr1	9353720	9353900	C42B_NDR_669	6.05388	*
chr1	9366060	9366200	C42B_NDR_670	4.4705	*
chr1	9384340	9384480	C42B_NDR_671	3.87003	*
chr1	9398960	9399180	C42B_NDR_672	7.12849	*
chr1	9444800	9444940	C42B_NDR_673	5.79965	*
chr1	9444960	9445220	C42B_NDR_674	7.28626	*
chr1	9481940	9482100	C42B_NDR_675	4.23663	*
chr1	9488840	9489100	C42B_NDR_676	10.4423	*
chr1	9489120	9489260	C42B_NDR_677	5.46771	*
chr1	9535580	9535720	C42B_NDR_678	4.22824	*
chr1	9545440	9545580	C42B_NDR_679	4.82198	*
chr1	9551180	9551440	C42B_NDR_680	18.7199	*
chr1	9555420	9555580	C42B_NDR_681	5.39231	*
chr1	9572500	9572660	C42B_NDR_682	6.58514	*
chr1	9598200	9598380	C42B_NDR_683	6.65653	*
chr1	9599160	9599540	C42B_NDR_684	11.608	*
chr1	9600100	9600280	C42B_NDR_685	5.69197	*
chr1	9601200	9601360	C42B_NDR_686	4.96896	*
chr1	9613780	9613980	C42B_NDR_687	7.76495	*
chr1	9615160	9615340	C42B_NDR_688	6.65292	*
chr1	9615520	9615760	C42B_NDR_689	7.12405	*
chr1	9620980	9621160	C42B_NDR_690	7.35443	*
chr1	9621660	9621860	C42B_NDR_691	9.08561	*
chr1	9622280	9622420	C42B_NDR_692	4.7725	*
chr1	9631660	9631820	C42B_NDR_693	6.16461	*
chr1	9648500	9648740	C42B_NDR_694	15.0976	*
chr1	9662760	9663000	C42B_NDR_695	4.94703	*
chr1	9667020	9667360	C42B_NDR_696	16.1894	*
chr1	9697420	9697580	C42B_NDR_697	3.71404	*
chr1	9742060	9742200	C42B_NDR_698	4.50584	*
chr1	9746880	9747020	C42B_NDR_699	3.22518	*
chr1	9749400	9749640	C42B_NDR_700	9.13945	*
chr1	9779080	9779240	C42B_NDR_701	4.35331	*
chr1	9806860	9807060	C42B_NDR_702	7.26395	*
chr1	9826900	9827040	C42B_NDR_703	4.86251	*
chr1	9844720	9844900	C42B_NDR_704	6.08378	*
chr1	9852320	9852520	C42B_NDR_705	8.72399	*
chr1	9883960	9884160	C42B_NDR_706	5.95249	*
chr1	9902820	9903000	C42B_NDR_707	5.78688	*
chr1	9903060	9903200	C42B_NDR_708	5.28891	*
chr1	9903600	9903960	C42B_NDR_709	10.2827	*
chr1	9904280	9904460	C42B_NDR_710	6.73043	*
chr1	9927600	9927840	C42B_NDR_711	9.64943	*
chr1	9935000	9935200	C42B_NDR_712	4.56447	*
chr1	9960140	9960280	C42B_NDR_713	5.19819	*
chr1	9960820	9960960	C42B_NDR_714	4.29648	*
chr1	9970280	9970860	C42B_NDR_715	10.5617	*
chr1	9970920	9971080	C42B_NDR_716	5.5081	*
chr1	9971120	9971280	C42B_NDR_717	6.85425	*
chr1	10003320	10003560	C42B_NDR_718	10.0296	*
chr1	10010560	10010760	C42B_NDR_719	10.2439	*
chr1	10067460	10067600	C42B_NDR_720	5.74486	*
chr1	10092600	10092880	C42B_NDR_721	6.8998	*
chr1	10093140	10093280	C42B_NDR_722	4.18078	*
chr1	10106200	10106340	C42B_NDR_723	3.97215	*
chr1	10116400	10116620	C42B_NDR_724	8.15874	*
chr1	10169380	10169620	C42B_NDR_725	7.31889	*
chr1	10177360	10177520	C42B_NDR_726	5.64724	*
chr1	10271520	10271780	C42B_NDR_727	11.3206	*
chr1	10458800	10459200	C42B_NDR_728	13.2483	*
chr1	10459360	10459600	C42B_NDR_729	8.39326	*
chr1	10475560	10475720	C42B_NDR_730	5.49442	*
chr1	10488140	10488360	C42B_NDR_731	12.621	*
chr1	10490380	10490600	C42B_NDR_732	10.4625	*
chr1	10490720	10490880	C42B_NDR_733	6.43044	*
chr1	10490920	10491080	C42B_NDR_734	3.99809	*
chr1	10511320	10511460	C42B_NDR_735	3.9913	*
chr1	10534860	10535120	C42B_NDR_736	8.26529	*
chr1	10554760	10555000	C42B_NDR_737	8.53804	*
chr1	10555160	10555420	C42B_NDR_738	10.6953	*
chr1	10574560	10574740	C42B_NDR_739	6.89005	*
chr1	10625860	10626040	C42B_NDR_740	5.47462	*
chr1	10688900	10689100	C42B_NDR_741	8.0702	*
chr1	10695520	10695700	C42B_NDR_742	6.54087	*
chr1	10696080	10696400	C42B_NDR_743	11.917	*
chr1	10701180	10701320	C42B_NDR_744	4.03875	*
chr1	10710080	10710220	C42B_NDR_745	4.54438	*
chr1	10711920	10712100	C42B_NDR_746	7.10556	*
chr1	10725980	10726320	C42B_NDR_747	11.2181	*
chr1	10728820	10729000	C42B_NDR_748	4.84847	*
chr1	10737660	10737840	C42B_NDR_749	4.70443	*
chr1	10739820	10740000	C42B_NDR_750	7.59213	*
chr1	10740040	10740200	C42B_NDR_751	4.47368	*
chr1	10747300	10747440	C42B_NDR_752	5.44761	*
chr1	10747720	10747860	C42B_NDR_753	3.66814	*
chr1	10754600	10754760	C42B_NDR_754	8.01784	*
chr1	10754880	10755060	C42B_NDR_755	6.88014	*
chr1	10758840	10758980	C42B_NDR_756	5.30053	*
chr1	10774460	10774640	C42B_NDR_757	9.09747	*
chr1	10774860	10775020	C42B_NDR_758	5.05786	*
chr1	10784160	10784420	C42B_NDR_759	11.4214	*
chr1	10786580	10786800	C42B_NDR_760	10.5603	*
chr1	10815860	10816040	C42B_NDR_761	6.93353	*
chr1	10817400	10817540	C42B_NDR_762	3.78824	*
chr1	10836400	10836540	C42B_NDR_763	5.6836	*
chr1	10836600	10836820	C42B_NDR_764	8.62108	*
chr1	10839320	10839460	C42B_NDR_765	5.34212	*
chr1	10848560	10848820	C42B_NDR_766	12.0165	*
chr1	10856700	10856940	C42B_NDR_767	5.46543	*
chr1	10875140	10875280	C42B_NDR_768	4.58843	*
chr1	10927180	10927360	C42B_NDR_769	11.0329	*
chr1	10970040	10970200	C42B_NDR_770	4.45716	*
chr1	11001940	11002080	C42B_NDR_771	3.46203	*
chr1	11020760	11020900	C42B_NDR_772	4.36982	*
chr1	11021140	11021360	C42B_NDR_773	7.28511	*
chr1	11028640	11028800	C42B_NDR_774	5.58468	*
chr1	11040280	11040480	C42B_NDR_775	9.26477	*
chr1	11072260	11072400	C42B_NDR_776	5.29576	*
chr1	11073040	11073280	C42B_NDR_777	11.3346	*
chr1	11073320	11073460	C42B_NDR_778	4.97496	*
chr1	11097680	11097940	C42B_NDR_779	6.97014	*
chr1	11120020	11120200	C42B_NDR_780	8.79624	*
chr1	11120640	11120780	C42B_NDR_781	4.12289	*
chr1	11132060	11132220	C42B_NDR_782	6.79428	*
chr1	11159380	11159580	C42B_NDR_783	14.4294	*
chr1	11159820	11160060	C42B_NDR_784	6.41459	*
chr1	11212300	11212500	C42B_NDR_785	10.6177	*
chr1	11322660	11322800	C42B_NDR_786	5.87943	*
chr1	11322840	11323000	C42B_NDR_787	4.01481	*
chr1	11332900	11333180	C42B_NDR_788	7.28173	*
chr1	11397680	11397860	C42B_NDR_789	6.43876	*
chr1	11455380	11455520	C42B_NDR_790	4.35099	*
chr1	11464440	11464600	C42B_NDR_791	7.98307	*
chr1	11506440	11506600	C42B_NDR_792	5.08511	*
chr1	11515840	11515980	C42B_NDR_793	5.54048	*
chr1	11538700	11538980	C42B_NDR_794	6.82365	*
chr1	11544440	11544580	C42B_NDR_795	5.41312	*
chr1	11577520	11577660	C42B_NDR_796	3.99584	*
chr1	11577900	11578040	C42B_NDR_797	4.75004	*
chr1	11579800	11579960	C42B_NDR_798	4.73935	*
chr1	11586840	11587000	C42B_NDR_799	5.73161	*
chr1	11594620	11594780	C42B_NDR_800	6.20306	*
chr1	11629880	11630040	C42B_NDR_801	5.39935	*
chr1	11666500	11666680	C42B_NDR_802	6.12087	*
chr1	11705780	11706040	C42B_NDR_803	8.44155	*
chr1	11710640	11710820	C42B_NDR_804	8.35046	*
chr1	11713100	11713240	C42B_NDR_805	5.61167	*
chr1	11714900	11715040	C42B_NDR_806	4.97832	*
chr1	11715080	11715240	C42B_NDR_807	6.39343	*
chr1	11735460	11735600	C42B_NDR_808	4.10234	*
chr1	11740900	11741060	C42B_NDR_809	6.52989	*
chr1	11741140	11741320	C42B_NDR_810	7.38071	*
chr1	11741460	11741600	C42B_NDR_811	4.52902	*
chr1	11751200	11751340	C42B_NDR_812	5.36232	*
chr1	11767620	11767760	C42B_NDR_813	4.4162	*
chr1	11795960	11796160	C42B_NDR_814	10.8763	*
chr1	11796900	11797060	C42B_NDR_815	5.71592	*
chr1	11797340	11797720	C42B_NDR_816	10.2291	*
chr1	11822120	11822300	C42B_NDR_817	9.10155	*
chr1	11837340	11837520	C42B_NDR_818	4.51226	*
chr1	11865940	11866200	C42B_NDR_819	8.62376	*
chr1	11968220	11968420	C42B_NDR_820	7.80974	*
chr1	11968900	11969220	C42B_NDR_821	8.48329	*
chr1	11986500	11986700	C42B_NDR_822	7.60749	*
chr1	11994620	11994840	C42B_NDR_823	9.62145	*
chr1	11994920	11995080	C42B_NDR_824	6.06645	*
chr1	12029420	12029600	C42B_NDR_825	6.83501	*
chr1	12040080	12040320	C42B_NDR_826	15.0119	*
chr1	12040460	12040600	C42B_NDR_827	5.4253	*
chr1	12040800	12040980	C42B_NDR_828	5.02413	*
chr1	12079180	12079380	C42B_NDR_829	8.74067	*
chr1	12079460	12079640	C42B_NDR_830	9.48906	*
chr1	12100740	12101040	C42B_NDR_831	9.39358	*
chr1	12109740	12109980	C42B_NDR_832	10.9409	*
chr1	12152080	12152220	C42B_NDR_833	5.05335	*
chr1	12178720	12178960	C42B_NDR_834	8.52218	*
chr1	12184880	12185160	C42B_NDR_835	7.9793	*
chr1	12203780	12203960	C42B_NDR_836	6.82077	*
chr1	12217900	12218040	C42B_NDR_837	5.85663	*
chr1	12226900	12227100	C42B_NDR_838	6.39882	*
chr1	12248980	12249180	C42B_NDR_839	9.44331	*
chr1	12251840	12252000	C42B_NDR_840	3.83155	*
chr1	12257440	12257580	C42B_NDR_841	3.7188	*
chr1	12269040	12269220	C42B_NDR_842	7.74197	*
chr1	12292380	12292600	C42B_NDR_843	5.20643	*
chr1	12304740	12304960	C42B_NDR_844	10.5223	*
chr1	12311540	12311720	C42B_NDR_845	5.63334	*
chr1	12321800	12321980	C42B_NDR_846	5.26454	*
chr1	12374440	12374600	C42B_NDR_847	4.85977	*
chr1	12416400	12416600	C42B_NDR_848	8.76862	*
chr1	12428780	12428940	C42B_NDR_849	5.90362	*
chr1	12441600	12441800	C42B_NDR_850	8.18213	*
chr1	12467460	12467720	C42B_NDR_851	8.13859	*
chr1	12473820	12474020	C42B_NDR_852	8.14603	*
chr1	12521420	12521580	C42B_NDR_853	5.88268	*
chr1	12524720	12525020	C42B_NDR_854	8.74842	*
chr1	12538220	12538400	C42B_NDR_855	6.6287	*
chr1	12538460	12538620	C42B_NDR_856	6.50582	*
chr1	12556620	12556840	C42B_NDR_857	8.2648	*
chr1	12588420	12588560	C42B_NDR_858	5.07777	*
chr1	12589480	12589660	C42B_NDR_859	5.12514	*
chr1	12675480	12675700	C42B_NDR_860	5.89492	*
chr1	12677180	12677320	C42B_NDR_861	4.53557	*
chr1	12679900	12680200	C42B_NDR_862	8.20635	*
chr1	12719120	12719300	C42B_NDR_863	5.28098	*
chr1	12805420	12805620	C42B_NDR_864	6.35479	*
chr1	12822740	12822880	C42B_NDR_865	3.76903	*
chr1	12839260	12839400	C42B_NDR_866	5.03325	*
chr1	13811140	13811300	C42B_NDR_867	4.76634	*
chr1	13838940	13839100	C42B_NDR_868	4.51604	*
chr1	13839480	13839660	C42B_NDR_869	6.38571	*
chr1	13840480	13840660	C42B_NDR_870	8.43876	*
chr1	13843740	13844000	C42B_NDR_871	14.3035	*
chr1	13870600	13870780	C42B_NDR_872	8.02188	*
chr1	13926200	13926380	C42B_NDR_873	5.36283	*
chr1	13953360	13953520	C42B_NDR_874	5.26662	*
chr1	13992280	13992480	C42B_NDR_875	8.04968	*
chr1	14026420	14026580	C42B_NDR_876	5.68798	*
chr1	14026620	14026840	C42B_NDR_877	10.4946	*
chr1	14068700	14068840	C42B_NDR_878	4.26674	*
chr1	14075640	14075900	C42B_NDR_879	12.0059	*
chr1	14083900	14084040	C42B_NDR_880	4.00364	*
chr1	14087520	14087740	C42B_NDR_881	6.97106	*
chr1	14126100	14126300	C42B_NDR_882	8.97497	*
chr1	14286900	14287160	C42B_NDR_883	8.99508	*
chr1	14440480	14440620	C42B_NDR_884	6.93735	*
chr1	14461600	14461780	C42B_NDR_885	6.7497	*
chr1	14463780	14463920	C42B_NDR_886	4.21009	*
chr1	14467320	14467480	C42B_NDR_887	6.30723	*
chr1	14494440	14494580	C42B_NDR_888	4.78422	*
chr1	14617720	14617940	C42B_NDR_889	12.8792	*
chr1	14667980	14668140	C42B_NDR_890	4.98349	*
chr1	14687520	14687700	C42B_NDR_891	6.61863	*
chr1	14748680	14748920	C42B_NDR_892	7.81383	*
chr1	14824440	14824620	C42B_NDR_893	5.62151	*
chr1	14825440	14825640	C42B_NDR_894	7.30786	*
chr1	14826560	14826860	C42B_NDR_895	15.8493	*
chr1	14938080	14938220	C42B_NDR_896	5.33383	*
chr1	14952120	14952380	C42B_NDR_897	9.326	*
chr1	15058440	15058680	C42B_NDR_898	6.01486	*
chr1	15064160	15064380	C42B_NDR_899	8.94735	*
chr1	15202740	15202880	C42B_NDR_900	5.07917	*
chr1	15228720	15228880	C42B_NDR_901	3.85474	*
chr1	15282600	15282760	C42B_NDR_902	5.52391	*
chr1	15318940	15319080	C42B_NDR_903	4.02402	*
chr1	15321580	15321860	C42B_NDR_904	14.383	*
chr1	15341160	15341300	C42B_NDR_905	4.46103	*
chr1	15373080	15373260	C42B_NDR_906	6.75517	*
chr1	15397200	15397380	C42B_NDR_907	5.3255	*
chr1	15443540	15443740	C42B_NDR_908	7.14082	*
chr1	15478900	15479120	C42B_NDR_909	5.81147	*
chr1	15480100	15480320	C42B_NDR_910	9.31616	*
chr1	15573700	15573880	C42B_NDR_911	7.49305	*
chr1	15650160	15650340	C42B_NDR_912	5.15256	*
chr1	15708300	15708440	C42B_NDR_913	6.37259	*
chr1	15736380	15736560	C42B_NDR_914	8.09249	*
chr1	15794000	15794140	C42B_NDR_915	4.15676	*
chr1	15796500	15796640	C42B_NDR_916	3.6102	*
chr1	15828020	15828200	C42B_NDR_917	6.65127	*
chr1	15837240	15837400	C42B_NDR_918	4.6333	*
chr1	15850560	15850700	C42B_NDR_919	5.84009	*
chr1	15851480	15851740	C42B_NDR_920	8.24588	*
chr1	15853080	15853340	C42B_NDR_921	6.20907	*
chr1	15936860	15937000	C42B_NDR_922	4.72248	*
chr1	15966400	15966540	C42B_NDR_923	4.19774	*
chr1	16020400	16020560	C42B_NDR_924	4.24371	*
chr1	16028320	16028460	C42B_NDR_925	3.85394	*
chr1	16059860	16060000	C42B_NDR_926	4.50379	*
chr1	16070620	16070780	C42B_NDR_927	5.08369	*
chr1	16085120	16085300	C42B_NDR_928	4.9601	*
chr1	16118540	16118700	C42B_NDR_929	6.98619	*
chr1	16159900	16160160	C42B_NDR_930	7.00967	*
chr1	16162240	16162400	C42B_NDR_931	4.51252	*
chr1	16174080	16174360	C42B_NDR_932	11.9044	*
chr1	16185280	16185460	C42B_NDR_933	5.88481	*
chr1	16265920	16266160	C42B_NDR_934	10.1998	*
chr1	16279800	16279940	C42B_NDR_935	3.29233	*
chr1	16320680	16320820	C42B_NDR_936	4.59441	*
chr1	16346040	16346200	C42B_NDR_937	4.8819	*
chr1	16382600	16382780	C42B_NDR_938	4.95466	*
chr1	16391360	16391520	C42B_NDR_939	4.93819	*
chr1	16393460	16393600	C42B_NDR_940	4.06698	*
chr1	16400020	16400160	C42B_NDR_941	5.2323	*
chr1	16414780	16414920	C42B_NDR_942	5.17511	*
chr1	16437800	16437960	C42B_NDR_943	5.04948	*
chr1	16447560	16447780	C42B_NDR_944	11.4424	*
chr1	16533140	16533300	C42B_NDR_945	7.17591	*
chr1	16533460	16533660	C42B_NDR_946	8.25326	*
chr1	16538840	16539020	C42B_NDR_947	5.76713	*
chr1	16544880	16545060	C42B_NDR_948	7.88757	*
chr1	16575340	16575480	C42B_NDR_949	5.37485	*
chr1	16642180	16642340	C42B_NDR_950	4.93219	*
chr1	16678960	16679140	C42B_NDR_951	6.60263	*
chr1	16693540	16694040	C42B_NDR_952	6.95925	*
chr1	16738180	16738320	C42B_NDR_953	4.96909	*
chr1	16839960	16840140	C42B_NDR_954	8.09571	*
chr1	16840560	16840760	C42B_NDR_955	7.47995	*
chr1	16930960	16931240	C42B_NDR_956	11.621	*
chr1	16934740	16934920	C42B_NDR_957	7.20679	*
chr1	16934960	16935240	C42B_NDR_958	7.11049	*
chr1	16938700	16938860	C42B_NDR_959	4.55652	*
chr1	16939980	16940260	C42B_NDR_960	15.8643	*
chr1	16947540	16947820	C42B_NDR_961	8.52077	*
chr1	16949980	16950180	C42B_NDR_962	8.62524	*
chr1	16950520	16951040	C42B_NDR_963	10.9909	*
chr1	16958640	16958780	C42B_NDR_964	4.27829	*
chr1	16971180	16971340	C42B_NDR_965	5.65784	*
chr1	17020120	17020340	C42B_NDR_966	8.65865	*
chr1	17020740	17020920	C42B_NDR_967	6.46197	*
chr1	17023520	17023660	C42B_NDR_968	3.96398	*
chr1	17029780	17029940	C42B_NDR_969	5.56813	*
chr1	17038880	17039020	C42B_NDR_970	3.80534	*
chr1	17043200	17043340	C42B_NDR_971	4.9607	*
chr1	17215020	17215180	C42B_NDR_972	5.95418	*
chr1	17231300	17231580	C42B_NDR_973	10.754	*
chr1	17240400	17240580	C42B_NDR_974	8.14755	*
chr1	17252220	17252380	C42B_NDR_975	4.98229	*
chr1	17274800	17274980	C42B_NDR_976	6.81189	*
chr1	17275060	17275200	C42B_NDR_977	5.22645	*
chr1	17287320	17287500	C42B_NDR_978	6.98121	*
chr1	17380520	17380680	C42B_NDR_979	6.08116	*
chr1	17386200	17386460	C42B_NDR_980	6.10494	*
chr1	17402000	17402140	C42B_NDR_981	5.25299	*
chr1	17424400	17424560	C42B_NDR_982	4.63974	*
chr1	17445860	17446140	C42B_NDR_983	6.894	*
chr1	17452320	17452560	C42B_NDR_984	6.10581	*
chr1	17520440	17520580	C42B_NDR_985	5.59398	*
chr1	17538660	17538800	C42B_NDR_986	6.14977	*
chr1	17549500	17549660	C42B_NDR_987	3.90518	*
chr1	17560280	17560440	C42B_NDR_988	5.70062	*
chr1	17563680	17563840	C42B_NDR_989	6.77312	*
chr1	17641260	17641420	C42B_NDR_990	4.74952	*
chr1	17665180	17665320	C42B_NDR_991	4.13509	*
chr1	17674800	17674940	C42B_NDR_992	4.40682	*
chr1	17681640	17681800	C42B_NDR_993	3.83758	*
chr1	17720040	17720180	C42B_NDR_994	4.52031	*
chr1	17726720	17726860	C42B_NDR_995	4.25739	*
chr1	17755100	17755260	C42B_NDR_996	5.5996	*
chr1	17764180	17764360	C42B_NDR_997	5.20188	*
chr1	17764520	17764680	C42B_NDR_998	4.50902	*
chr1	17765360	17765520	C42B_NDR_999	4.62069	*
chr1	17766140	17766320	C42B_NDR_1000	6.0495	*
chr1	17803960	17804160	C42B_NDR_1001	6.4911	*
chr1	17846540	17846760	C42B_NDR_1002	8.82902	*
chr1	17864880	17865100	C42B_NDR_1003	5.03294	*
chr1	17891180	17891320	C42B_NDR_1004	3.74302	*
chr1	17932540	17932800	C42B_NDR_1005	6.06506	*
chr1	17940740	17940880	C42B_NDR_1006	3.86296	*
chr1	17957000	17957140	C42B_NDR_1007	5.01183	*
chr1	17980400	17980540	C42B_NDR_1008	5.43748	*
chr1	18139180	18139320	C42B_NDR_1009	4.71151	*
chr1	18158160	18158300	C42B_NDR_1010	6.31034	*
chr1	18195540	18195700	C42B_NDR_1011	4.89404	*
chr1	18290200	18290340	C42B_NDR_1012	4.11018	*
chr1	18320700	18320860	C42B_NDR_1013	5.70309	*
chr1	18385580	18385720	C42B_NDR_1014	4.37357	*
chr1	18385820	18385980	C42B_NDR_1015	5.67753	*
chr1	18388220	18388360	C42B_NDR_1016	4.48654	*
chr1	18391240	18391380	C42B_NDR_1017	4.80369	*
chr1	18433140	18433280	C42B_NDR_1018	4.26659	*
chr1	18460940	18461120	C42B_NDR_1019	6.06511	*
chr1	18492860	18493020	C42B_NDR_1020	6.08776	*
chr1	18528660	18528860	C42B_NDR_1021	7.00211	*
chr1	18582900	18583060	C42B_NDR_1022	4.73078	*
chr1	18596540	18596680	C42B_NDR_1023	4.10509	*
chr1	18611220	18611360	C42B_NDR_1024	4.21149	*
chr1	18626360	18626520	C42B_NDR_1025	5.91249	*
chr1	18646660	18646840	C42B_NDR_1026	5.94376	*
chr1	18681260	18681420	C42B_NDR_1027	5.7771	*
chr1	18791320	18791480	C42B_NDR_1028	5.6109	*
chr1	18862040	18862200	C42B_NDR_1029	6.83428	*
chr1	18881220	18881380	C42B_NDR_1030	5.44708	*
chr1	18882920	18883120	C42B_NDR_1031	8.05513	*
chr1	18925520	18925720	C42B_NDR_1032	7.35753	*
chr1	18940140	18940280	C42B_NDR_1033	4.20589	*
chr1	19145160	19145300	C42B_NDR_1034	5.04967	*
chr1	19161860	19162000	C42B_NDR_1035	4.4375	*
chr1	19164500	19164680	C42B_NDR_1036	5.65816	*
chr1	19210760	19210940	C42B_NDR_1037	6.42754	*
chr1	19229380	19229520	C42B_NDR_1038	6.37742	*
chr1	19233620	19233780	C42B_NDR_1039	6.15765	*
chr1	19282500	19282680	C42B_NDR_1040	8.0236	*
chr1	19283080	19283320	C42B_NDR_1041	7.1178	*
chr1	19337620	19337980	C42B_NDR_1042	8.26465	*
chr1	19362480	19362620	C42B_NDR_1043	4.18561	*
chr1	19364220	19364380	C42B_NDR_1044	4.70067	*
chr1	19392860	19393040	C42B_NDR_1045	4.81053	*
chr1	19394020	19394160	C42B_NDR_1046	4.84388	*
chr1	19483260	19483460	C42B_NDR_1047	6.49882	*
chr1	19536720	19536940	C42B_NDR_1048	5.71982	*
chr1	19559180	19559340	C42B_NDR_1049	5.49348	*
chr1	19577960	19578120	C42B_NDR_1050	6.95192	*
chr1	19600540	19600700	C42B_NDR_1051	4.27314	*
chr1	19638540	19638740	C42B_NDR_1052	7.13256	*
chr1	19638760	19638900	C42B_NDR_1053	5.46659	*
chr1	19670980	19671160	C42B_NDR_1054	6.23247	*
chr1	19694160	19694320	C42B_NDR_1055	5.91814	*
chr1	19739280	19739480	C42B_NDR_1056	9.89001	*
chr1	19753640	19753840	C42B_NDR_1057	8.96115	*
chr1	19785420	19785640	C42B_NDR_1058	7.52433	*
chr1	19795980	19796140	C42B_NDR_1059	5.99978	*
chr1	19812080	19812300	C42B_NDR_1060	7.67053	*
chr1	19970360	19970500	C42B_NDR_1061	4.14969	*
chr1	19977760	19977960	C42B_NDR_1062	7.77287	*
chr1	19980360	19980520	C42B_NDR_1063	4.52213	*
chr1	19986320	19986500	C42B_NDR_1064	6.54584	*
chr1	20030300	20030500	C42B_NDR_1065	6.7387	*
chr1	20042240	20042400	C42B_NDR_1066	6.27087	*
chr1	20102840	20103020	C42B_NDR_1067	6.44832	*
chr1	20199320	20199460	C42B_NDR_1068	5.22715	*
chr1	20208640	20208960	C42B_NDR_1069	7.22246	*
chr1	20209020	20209180	C42B_NDR_1070	6.12417	*
chr1	20243660	20243800	C42B_NDR_1071	4.44361	*
chr1	20451180	20451320	C42B_NDR_1072	4.93791	*
chr1	20466760	20466940	C42B_NDR_1073	5.58217	*
chr1	20539680	20539820	C42B_NDR_1074	4.10623	*
chr1	20683540	20683680	C42B_NDR_1075	4.53353	*
chr1	20685320	20685520	C42B_NDR_1076	12.5239	*
chr1	20701720	20701860	C42B_NDR_1077	4.3713	*
chr1	20716180	20716320	C42B_NDR_1078	4.306	*
chr1	20811940	20812200	C42B_NDR_1079	15.4703	*
chr1	20813540	20813680	C42B_NDR_1080	4.31819	*
chr1	20834640	20834820	C42B_NDR_1081	8.40993	*
chr1	20860340	20860540	C42B_NDR_1082	7.56713	*
chr1	20864900	20865080	C42B_NDR_1083	6.47677	*
chr1	20879020	20879160	C42B_NDR_1084	4.99857	*
chr1	20959840	20960020	C42B_NDR_1085	7.33055	*
chr1	20960380	20960540	C42B_NDR_1086	5.27305	*
chr1	20988020	20988220	C42B_NDR_1087	9.28635	*
chr1	21006820	21007000	C42B_NDR_1088	6.53546	*
chr1	21008160	21008300	C42B_NDR_1089	4.2357	*
chr1	21016300	21016440	C42B_NDR_1090	4.09306	*
chr1	21112820	21113020	C42B_NDR_1091	7.13284	*
chr1	21113760	21113900	C42B_NDR_1092	6.70802	*
chr1	21348840	21349020	C42B_NDR_1093	6.33074	*
chr1	21501940	21502100	C42B_NDR_1094	3.80901	*
chr1	21503280	21503440	C42B_NDR_1095	5.56131	*
chr1	21525060	21525200	C42B_NDR_1096	4.94441	*
chr1	21578420	21578560	C42B_NDR_1097	5.80434	*
chr1	21584120	21584260	C42B_NDR_1098	3.8197	*
chr1	21595540	21595680	C42B_NDR_1099	3.48074	*
chr1	21655820	21655980	C42B_NDR_1100	5.06544	*
chr1	21658780	21658980	C42B_NDR_1101	6.73698	*
chr1	21665120	21665480	C42B_NDR_1102	10.5951	*
chr1	21665700	21665880	C42B_NDR_1103	5.49067	*
chr1	21671860	21672080	C42B_NDR_1104	10.6638	*
chr1	21672280	21672460	C42B_NDR_1105	5.71173	*
chr1	21695040	21695220	C42B_NDR_1106	4.56254	*
chr1	21799440	21799580	C42B_NDR_1107	4.07263	*
chr1	21835600	21835740	C42B_NDR_1108	4.64085	*
chr1	21901820	21901960	C42B_NDR_1109	3.29043	*
chr1	21948840	21949040	C42B_NDR_1110	9.67848	*
chr1	21952200	21952340	C42B_NDR_1111	4.4282	*
chr1	22016360	22016540	C42B_NDR_1112	4.81492	*
chr1	22087660	22087820	C42B_NDR_1113	5.3953	*
chr1	22091600	22091780	C42B_NDR_1114	5.93525	*
chr1	22108980	22109120	C42B_NDR_1115	4.00721	*
chr1	22109680	22109840	C42B_NDR_1116	6.16519	*
chr1	22114820	22114960	C42B_NDR_1117	6.26311	*
chr1	22145220	22145360	C42B_NDR_1118	7.19641	*
chr1	22196500	22196660	C42B_NDR_1119	5.35106	*
chr1	22202320	22202460	C42B_NDR_1120	5.5853	*
chr1	22226120	22226260	C42B_NDR_1121	4.66714	*
chr1	22295400	22295540	C42B_NDR_1122	4.07685	*
chr1	22342500	22342660	C42B_NDR_1123	3.95372	*
chr1	22379120	22379280	C42B_NDR_1124	6.22668	*
chr1	22380120	22380280	C42B_NDR_1125	7.53713	*
chr1	22444380	22444540	C42B_NDR_1126	4.81594	*
chr1	22487680	22487840	C42B_NDR_1127	4.93776	*
chr1	22524240	22524420	C42B_NDR_1128	5.85071	*
chr1	22531780	22531940	C42B_NDR_1129	6.19406	*
chr1	22537080	22537240	C42B_NDR_1130	4.15218	*
chr1	22583200	22583380	C42B_NDR_1131	5.40735	*
chr1	22584400	22584640	C42B_NDR_1132	7.79197	*
chr1	22586340	22586640	C42B_NDR_1133	8.87892	*
chr1	22609380	22609520	C42B_NDR_1134	4.4299	*
chr1	22623740	22623880	C42B_NDR_1135	4.51835	*
chr1	22648420	22648560	C42B_NDR_1136	5.06877	*
chr1	22740880	22741120	C42B_NDR_1137	7.02336	*
chr1	22743120	22743380	C42B_NDR_1138	6.33376	*
chr1	22747000	22747200	C42B_NDR_1139	6.94765	*
chr1	22778260	22778460	C42B_NDR_1140	7.40691	*
chr1	22799340	22799500	C42B_NDR_1141	5.19256	*
chr1	22859200	22859380	C42B_NDR_1142	6.09557	*
chr1	22879380	22879520	C42B_NDR_1143	4.86099	*
chr1	22927260	22927400	C42B_NDR_1144	5.56376	*
chr1	23031060	23031240	C42B_NDR_1145	6.43687	*
chr1	23037400	23037540	C42B_NDR_1146	4.59144	*
chr1	23037620	23037760	C42B_NDR_1147	5.37901	*
chr1	23077320	23077460	C42B_NDR_1148	3.81414	*
chr1	23077820	23078000	C42B_NDR_1149	5.82807	*
chr1	23100740	23100920	C42B_NDR_1150	4.97934	*
chr1	23180100	23180280	C42B_NDR_1151	7.42061	*
chr1	23197200	23197420	C42B_NDR_1152	7.19082	*
chr1	23239320	23239480	C42B_NDR_1153	5.97934	*
chr1	23256940	23257080	C42B_NDR_1154	3.88838	*
chr1	23270140	23270280	C42B_NDR_1155	4.56575	*
chr1	23295920	23296060	C42B_NDR_1156	6.04623	*
chr1	23368000	23368140	C42B_NDR_1157	3.66659	*
chr1	23671100	23671260	C42B_NDR_1158	5.11402	*
chr1	23694780	23695060	C42B_NDR_1159	7.33306	*
chr1	23710060	23710220	C42B_NDR_1160	3.46039	*
chr1	23730560	23730740	C42B_NDR_1161	6.31741	*
chr1	23766340	23766480	C42B_NDR_1162	3.62134	*
chr1	23778480	23778660	C42B_NDR_1163	6.51159	*
chr1	23779260	23779400	C42B_NDR_1164	4.55773	*
chr1	23793140	23793320	C42B_NDR_1165	4.05593	*
chr1	23805620	23805820	C42B_NDR_1166	7.03993	*
chr1	23823920	23824060	C42B_NDR_1167	3.92367	*
chr1	23832240	23832420	C42B_NDR_1168	5.43271	*
chr1	23852900	23853060	C42B_NDR_1169	4.76416	*
chr1	23854820	23855000	C42B_NDR_1170	9.54864	*
chr1	23857860	23858000	C42B_NDR_1171	5.70854	*
chr1	23871380	23871520	C42B_NDR_1172	4.37266	*
chr1	23881480	23881620	C42B_NDR_1173	5.0127	*
chr1	23888940	23889100	C42B_NDR_1174	5.22956	*
chr1	23946280	23946460	C42B_NDR_1175	5.33496	*
chr1	23965660	23965800	C42B_NDR_1176	4.33818	*
chr1	23987400	23987540	C42B_NDR_1177	4.5722	*
chr1	24054060	24054220	C42B_NDR_1178	6.25512	*
chr1	24070960	24071140	C42B_NDR_1179	5.89825	*
chr1	24072140	24072320	C42B_NDR_1180	5.98725	*
chr1	24095860	24096020	C42B_NDR_1181	3.85364	*
chr1	24098760	24098920	C42B_NDR_1182	5.45487	*
chr1	24136280	24136460	C42B_NDR_1183	5.18415	*
chr1	24150400	24150560	C42B_NDR_1184	4.14854	*
chr1	24194560	24194720	C42B_NDR_1185	4.8717	*
chr1	24246560	24246840	C42B_NDR_1186	9.2225	*
chr1	24283740	24283920	C42B_NDR_1187	6.143	*
chr1	24285460	24285760	C42B_NDR_1188	6.84391	*
chr1	24286040	24286400	C42B_NDR_1189	9.67658	*
chr1	24306700	24307040	C42B_NDR_1190	7.85654	*
chr1	24311040	24311200	C42B_NDR_1191	6.93096	*
chr1	24397320	24397560	C42B_NDR_1192	7.12628	*
chr1	24406760	24406920	C42B_NDR_1193	5.20991	*
chr1	24428120	24428260	C42B_NDR_1194	4.33445	*
chr1	24446680	24446840	C42B_NDR_1195	5.27278	*
chr1	24455800	24455940	C42B_NDR_1196	4.9839	*
chr1	24477020	24477200	C42B_NDR_1197	5.56186	*
chr1	24480780	24480920	C42B_NDR_1198	4.74666	*
chr1	24528520	24528860	C42B_NDR_1199	11.87	*
chr1	24530020	24530200	C42B_NDR_1200	6.77157	*
chr1	24616560	24616760	C42B_NDR_1201	8.34525	*
chr1	24740120	24740300	C42B_NDR_1202	6.46441	*
chr1	24742180	24742360	C42B_NDR_1203	5.61266	*
chr1	24829280	24829440	C42B_NDR_1204	4.38198	*
chr1	25174660	25174880	C42B_NDR_1205	6.84892	*
chr1	25191080	25191280	C42B_NDR_1206	7.54851	*
chr1	25198920	25199060	C42B_NDR_1207	6.08284	*
chr1	25232220	25232360	C42B_NDR_1208	5.59586	*
chr1	25269280	25269420	C42B_NDR_1209	5.21359	*
chr1	25313260	25313420	C42B_NDR_1210	6.30637	*
chr1	25338640	25339020	C42B_NDR_1211	8.76016	*
chr1	25352840	25353020	C42B_NDR_1212	5.93297	*
chr1	25366840	25366980	C42B_NDR_1213	3.7981	*
chr1	25378440	25378580	C42B_NDR_1214	4.18756	*
chr1	25392220	25392400	C42B_NDR_1215	5.06647	*
chr1	25408120	25408280	C42B_NDR_1216	3.75733	*
chr1	25427940	25428080	C42B_NDR_1217	4.61223	*
chr1	25530860	25531000	C42B_NDR_1218	4.29018	*
chr1	25573980	25574120	C42B_NDR_1219	5.97674	*
chr1	25594420	25594580	C42B_NDR_1220	6.5147	*
chr1	25616620	25616840	C42B_NDR_1221	9.81095	*
chr1	25664960	25665160	C42B_NDR_1222	6.9055	*
chr1	25756620	25756840	C42B_NDR_1223	10.2686	*
chr1	25757840	25758020	C42B_NDR_1224	6.37911	*
chr1	25785600	25785780	C42B_NDR_1225	7.77493	*
chr1	25805280	25805500	C42B_NDR_1226	7.12917	*
chr1	25810620	25810900	C42B_NDR_1227	8.48055	*
chr1	25839860	25840000	C42B_NDR_1228	5.90923	*
chr1	25923560	25923700	C42B_NDR_1229	4.59039	*
chr1	25935160	25935380	C42B_NDR_1230	7.66018	*
chr1	25975000	25975160	C42B_NDR_1231	5.67317	*
chr1	26027480	26027640	C42B_NDR_1232	3.8336	*
chr1	26029760	26029900	C42B_NDR_1233	3.75392	*
chr1	26075400	26075660	C42B_NDR_1234	22.877	*
chr1	26092880	26093080	C42B_NDR_1235	8.53946	*
chr1	26093300	26093520	C42B_NDR_1236	7.52121	*
chr1	26123120	26123320	C42B_NDR_1237	6.66733	*
chr1	26127200	26127360	C42B_NDR_1238	4.22262	*
chr1	26133080	26133260	C42B_NDR_1239	7.4551	*
chr1	26137500	26137640	C42B_NDR_1240	5.73155	*
chr1	26185900	26186100	C42B_NDR_1241	8.28594	*
chr1	26198860	26199000	C42B_NDR_1242	5.63242	*
chr1	26217020	26217200	C42B_NDR_1243	7.12861	*
chr1	26293380	26293520	C42B_NDR_1244	4.7915	*
chr1	26348780	26348920	C42B_NDR_1245	4.90513	*
chr1	26352180	26352320	C42B_NDR_1246	3.88289	*
chr1	26361900	26362080	C42B_NDR_1247	6.11859	*
chr1	26406780	26406940	C42B_NDR_1248	5.26099	*
chr1	26421240	26421420	C42B_NDR_1249	6.29606	*
chr1	26438240	26438440	C42B_NDR_1250	7.8764	*
chr1	26438980	26439140	C42B_NDR_1251	6.77788	*
chr1	26453120	26453360	C42B_NDR_1252	6.61948	*
chr1	26488380	26488540	C42B_NDR_1253	6.15404	*
chr1	26490760	26490940	C42B_NDR_1254	4.86001	*
chr1	26496240	26496460	C42B_NDR_1255	6.18179	*
chr1	26503840	26504080	C42B_NDR_1256	8.86994	*
chr1	26560620	26560820	C42B_NDR_1257	7.23923	*
chr1	26560900	26561040	C42B_NDR_1258	5.94387	*
chr1	26584620	26584760	C42B_NDR_1259	4.55724	*
chr1	26611640	26611800	C42B_NDR_1260	4.25168	*
chr1	26612380	26612520	C42B_NDR_1261	5.50264	*
chr1	26655180	26655340	C42B_NDR_1262	5.83719	*
chr1	26680620	26680780	C42B_NDR_1263	5.22378	*
chr1	26722860	26723000	C42B_NDR_1264	4.49588	*
chr1	26758540	26758680	C42B_NDR_1265	4.92811	*
chr1	26798180	26798360	C42B_NDR_1266	5.05866	*
chr1	26799580	26799800	C42B_NDR_1267	8.63359	*
chr1	26827200	26827360	C42B_NDR_1268	5.81881	*
chr1	26856200	26856360	C42B_NDR_1269	3.60417	*
chr1	26859060	26859220	C42B_NDR_1270	7.30641	*
chr1	26868480	26868620	C42B_NDR_1271	5.50948	*
chr1	26904900	26905040	C42B_NDR_1272	4.9361	*
chr1	26928900	26929060	C42B_NDR_1273	5.48973	*
chr1	26946680	26946820	C42B_NDR_1274	4.16334	*
chr1	27004060	27004360	C42B_NDR_1275	14.7395	*
chr1	27018700	27018900	C42B_NDR_1276	7.25112	*
chr1	27018960	27019160	C42B_NDR_1277	7.95537	*
chr1	27019380	27019640	C42B_NDR_1278	8.29255	*
chr1	27019840	27020000	C42B_NDR_1279	5.65678	*
chr1	27021980	27022160	C42B_NDR_1280	8.11957	*
chr1	27023060	27023300	C42B_NDR_1281	5.38293	*
chr1	27024100	27024240	C42B_NDR_1282	4.68144	*
chr1	27024720	27024860	C42B_NDR_1283	5.19894	*
chr1	27028500	27028680	C42B_NDR_1284	5.97773	*
chr1	27031840	27032000	C42B_NDR_1285	3.62107	*
chr1	27032320	27032520	C42B_NDR_1286	8.28684	*
chr1	27032900	27033120	C42B_NDR_1287	8.98602	*
chr1	27055220	27055500	C42B_NDR_1288	8.79433	*
chr1	27100820	27101020	C42B_NDR_1289	7.7435	*
chr1	27114100	27114240	C42B_NDR_1290	4.00427	*
chr1	27114260	27114500	C42B_NDR_1291	15.1118	*
chr1	27114560	27114720	C42B_NDR_1292	4.02984	*
chr1	27115720	27115960	C42B_NDR_1293	13.9956	*
chr1	27126020	27126220	C42B_NDR_1294	8.2642	*
chr1	27136600	27136760	C42B_NDR_1295	5.70406	*
chr1	27150300	27150440	C42B_NDR_1296	5.16943	*
chr1	27151400	27151560	C42B_NDR_1297	5.68831	*
chr1	27153000	27153260	C42B_NDR_1298	7.18602	*
chr1	27153460	27153620	C42B_NDR_1299	4.76872	*
chr1	27191660	27191960	C42B_NDR_1300	13.4052	*
chr1	27194620	27194800	C42B_NDR_1301	5.66226	*
chr1	27216740	27216940	C42B_NDR_1302	7.68202	*
chr1	27243140	27243280	C42B_NDR_1303	3.61138	*
chr1	27247960	27248100	C42B_NDR_1304	4.26976	*
chr1	27269680	27269840	C42B_NDR_1305	4.34104	*
chr1	27286280	27286420	C42B_NDR_1306	3.54714	*
chr1	27286940	27287100	C42B_NDR_1307	6.95789	*
chr1	27334720	27334940	C42B_NDR_1308	6.71114	*
chr1	27363720	27363860	C42B_NDR_1309	3.33324	*
chr1	27371080	27371340	C42B_NDR_1310	6.47243	*
chr1	27371360	27371520	C42B_NDR_1311	5.21289	*
chr1	27372460	27372640	C42B_NDR_1312	8.63631	*
chr1	27429220	27429480	C42B_NDR_1313	9.6204	*
chr1	27442220	27442380	C42B_NDR_1314	5.85114	*
chr1	27468320	27468480	C42B_NDR_1315	5.42889	*
chr1	27470920	27471120	C42B_NDR_1316	9.30812	*
chr1	27545340	27545480	C42B_NDR_1317	4.78892	*
chr1	27560740	27560960	C42B_NDR_1318	6.0784	*
chr1	27560980	27561140	C42B_NDR_1319	5.84327	*
chr1	27611280	27611480	C42B_NDR_1320	9.63246	*
chr1	27627320	27627500	C42B_NDR_1321	7.4074	*
chr1	27648440	27648740	C42B_NDR_1322	7.53472	*
chr1	27668420	27668600	C42B_NDR_1323	6.49998	*
chr1	27675900	27676300	C42B_NDR_1324	9.73957	*
chr1	27676400	27676660	C42B_NDR_1325	13.6687	*
chr1	27684020	27684320	C42B_NDR_1326	9.63459	*
chr1	27692340	27692500	C42B_NDR_1327	4.83564	*
chr1	27693020	27693240	C42B_NDR_1328	7.66982	*
chr1	27693400	27693660	C42B_NDR_1329	8.71096	*
chr1	27709720	27709900	C42B_NDR_1330	6.03986	*
chr1	27715080	27715220	C42B_NDR_1331	4.67333	*
chr1	27718960	27719120	C42B_NDR_1332	4.7392	*
chr1	27722000	27722220	C42B_NDR_1333	9.76603	*
chr1	27727800	27727960	C42B_NDR_1334	4.44893	*
chr1	27763100	27763280	C42B_NDR_1335	6.39887	*
chr1	27816580	27816860	C42B_NDR_1336	7.28899	*
chr1	27845940	27846120	C42B_NDR_1337	8.39512	*
chr1	27880980	27881120	C42B_NDR_1338	5.26164	*
chr1	27888640	27888800	C42B_NDR_1339	4.69392	*
chr1	27890800	27890960	C42B_NDR_1340	4.54634	*
chr1	27894880	27895200	C42B_NDR_1341	8.26963	*
chr1	27908220	27908360	C42B_NDR_1342	4.46266	*
chr1	27920200	27920360	C42B_NDR_1343	4.72068	*
chr1	27928320	27928460	C42B_NDR_1344	5.61063	*
chr1	27929660	27929840	C42B_NDR_1345	7.81279	*
chr1	27933020	27933180	C42B_NDR_1346	6.28441	*
chr1	27941960	27942100	C42B_NDR_1347	5.56046	*
chr1	27970520	27970700	C42B_NDR_1348	8.79323	*
chr1	27986580	27986820	C42B_NDR_1349	12.2974	*
chr1	27995720	27995940	C42B_NDR_1350	5.04332	*
chr1	27998600	27998900	C42B_NDR_1351	7.00785	*
chr1	28052040	28052400	C42B_NDR_1352	16.0071	*
chr1	28082440	28082580	C42B_NDR_1353	4.49791	*
chr1	28116080	28116280	C42B_NDR_1354	5.56383	*
chr1	28116380	28116600	C42B_NDR_1355	8.26217	*
chr1	28157140	28157400	C42B_NDR_1356	7.6046	*
chr1	28157460	28157620	C42B_NDR_1357	5.83978	*
chr1	28161940	28162100	C42B_NDR_1358	4.19879	*
chr1	28241020	28241460	C42B_NDR_1359	7.97822	*
chr1	28261440	28261700	C42B_NDR_1360	7.06694	*
chr1	28261920	28262060	C42B_NDR_1361	4.19661	*
chr1	28286580	28286860	C42B_NDR_1362	13.4344	*
chr1	28399060	28399200	C42B_NDR_1363	3.83521	*
chr1	28415060	28415420	C42B_NDR_1364	6.81364	*
chr1	28417840	28418020	C42B_NDR_1365	6.56158	*
chr1	28439000	28439140	C42B_NDR_1366	4.03766	*
chr1	28439500	28439640	C42B_NDR_1367	7.22406	*
chr1	28479460	28479620	C42B_NDR_1368	4.50561	*
chr1	28481360	28481520	C42B_NDR_1369	3.84255	*
chr1	28521140	28521300	C42B_NDR_1370	4.11779	*
chr1	28535440	28535640	C42B_NDR_1371	5.84172	*
chr1	28559400	28559720	C42B_NDR_1372	11.678	*
chr1	28562340	28562760	C42B_NDR_1373	15.5534	*
chr1	28573420	28573560	C42B_NDR_1374	4.41983	*
chr1	28573640	28574060	C42B_NDR_1375	16.0416	*
chr1	28575140	28575320	C42B_NDR_1376	7.45293	*
chr1	28576120	28576300	C42B_NDR_1377	8.34524	*
chr1	28585640	28585920	C42B_NDR_1378	8.91091	*
chr1	28640560	28640740	C42B_NDR_1379	9.08103	*
chr1	28655300	28655480	C42B_NDR_1380	8.94425	*
chr1	28696020	28696300	C42B_NDR_1381	8.28905	*
chr1	28696420	28696580	C42B_NDR_1382	5.61655	*
chr1	28764420	28764680	C42B_NDR_1383	8.43934	*
chr1	28832300	28832480	C42B_NDR_1384	8.74889	*
chr1	28833020	28833200	C42B_NDR_1385	7.21007	*
chr1	28844540	28844700	C42B_NDR_1386	4.8529	*
chr1	28853560	28853700	C42B_NDR_1387	4.37705	*
chr1	28879120	28879480	C42B_NDR_1388	9.81648	*
chr1	28879500	28879680	C42B_NDR_1389	9.95408	*
chr1	28907440	28907680	C42B_NDR_1390	10.8864	*
chr1	28908240	28908540	C42B_NDR_1391	8.28568	*
chr1	28961780	28961960	C42B_NDR_1392	5.60486	*
chr1	28968660	28968840	C42B_NDR_1393	7.50071	*
chr1	28969440	28969820	C42B_NDR_1394	11.8124	*
chr1	28970420	28970580	C42B_NDR_1395	5.31242	*
chr1	28974760	28974940	C42B_NDR_1396	7.6623	*
chr1	28975060	28975240	C42B_NDR_1397	5.66951	*
chr1	28995120	28995280	C42B_NDR_1398	6.21312	*
chr1	29063180	29063500	C42B_NDR_1399	9.32761	*
chr1	29063600	29063740	C42B_NDR_1400	4.20365	*
chr1	29063780	29063920	C42B_NDR_1401	4.46644	*
chr1	29111740	29111920	C42B_NDR_1402	6.42761	*
chr1	29203720	29203920	C42B_NDR_1403	10.4641	*
chr1	29208360	29208540	C42B_NDR_1404	4.79934	*
chr1	29208580	29208920	C42B_NDR_1405	17.3609	*
chr1	29211560	29211800	C42B_NDR_1406	8.22639	*
chr1	29213560	29213720	C42B_NDR_1407	6.48633	*
chr1	29240660	29240840	C42B_NDR_1408	7.11812	*
chr1	29241620	29241800	C42B_NDR_1409	6.71712	*
chr1	29317780	29317940	C42B_NDR_1410	4.08156	*
chr1	29344220	29344380	C42B_NDR_1411	7.06211	*
chr1	29432440	29432620	C42B_NDR_1412	6.13047	*
chr1	29436740	29436880	C42B_NDR_1413	3.98382	*
chr1	29460220	29460420	C42B_NDR_1414	8.21468	*
chr1	29463120	29463360	C42B_NDR_1415	19.2968	*
chr1	29507940	29508120	C42B_NDR_1416	10.2321	*
chr1	29508280	29508780	C42B_NDR_1417	17.4735	*
chr1	29529380	29529540	C42B_NDR_1418	5.30655	*
chr1	29557340	29557580	C42B_NDR_1419	8.42008	*
chr1	29562820	29563060	C42B_NDR_1420	4.91169	*
chr1	29563140	29563320	C42B_NDR_1421	8.26691	*
chr1	29564100	29564280	C42B_NDR_1422	7.84219	*
chr1	29598300	29598560	C42B_NDR_1423	8.55238	*
chr1	29631920	29632060	C42B_NDR_1424	4.31582	*
chr1	29676580	29676820	C42B_NDR_1425	5.24507	*
chr1	29683240	29683380	C42B_NDR_1426	4.62953	*
chr1	29698020	29698200	C42B_NDR_1427	7.97461	*
chr1	29719980	29720120	C42B_NDR_1428	5.23962	*
chr1	29800260	29800400	C42B_NDR_1429	4.16389	*
chr1	29841400	29841560	C42B_NDR_1430	6.19363	*
chr1	30094800	30094940	C42B_NDR_1431	4.49482	*
chr1	30105240	30105400	C42B_NDR_1432	6.05927	*
chr1	30155160	30155320	C42B_NDR_1433	4.38325	*
chr1	30155960	30156120	C42B_NDR_1434	6.80732	*
chr1	30167960	30168100	C42B_NDR_1435	3.74317	*
chr1	30176460	30176700	C42B_NDR_1436	9.99602	*
chr1	30181320	30181460	C42B_NDR_1437	5.30839	*
chr1	30197620	30197760	C42B_NDR_1438	4.64884	*
chr1	30199300	30199440	C42B_NDR_1439	4.62405	*
chr1	30242720	30242860	C42B_NDR_1440	3.26559	*
chr1	30256680	30256820	C42B_NDR_1441	4.34984	*
chr1	30265880	30266060	C42B_NDR_1442	8.50598	*
chr1	30296600	30296740	C42B_NDR_1443	4.17695	*
chr1	30321920	30322100	C42B_NDR_1444	6.09438	*
chr1	30366120	30366280	C42B_NDR_1445	5.25475	*
chr1	30375900	30376040	C42B_NDR_1446	4.45863	*
chr1	30463900	30464180	C42B_NDR_1447	11.1475	*
chr1	30584840	30584980	C42B_NDR_1448	4.55769	*
chr1	30591600	30591760	C42B_NDR_1449	4.39059	*
chr1	30612700	30612860	C42B_NDR_1450	4.51627	*
chr1	30622200	30622340	C42B_NDR_1451	5.17652	*
chr1	30701120	30701280	C42B_NDR_1452	4.21275	*
chr1	30728840	30728980	C42B_NDR_1453	3.95241	*
chr1	30795460	30795600	C42B_NDR_1454	4.59321	*
chr1	30829200	30829340	C42B_NDR_1455	4.61014	*
chr1	30853260	30853420	C42B_NDR_1456	4.9691	*
chr1	30922380	30922560	C42B_NDR_1457	5.79536	*
chr1	30934500	30934660	C42B_NDR_1458	5.35379	*
chr1	31005980	31006280	C42B_NDR_1459	6.36605	*
chr1	31009360	31009500	C42B_NDR_1460	4.00811	*
chr1	31012540	31012680	C42B_NDR_1461	4.75171	*
chr1	31111700	31111880	C42B_NDR_1462	5.66915	*
chr1	31137140	31137280	C42B_NDR_1463	4.52897	*
chr1	31168300	31168460	C42B_NDR_1464	5.52258	*
chr1	31178920	31179060	C42B_NDR_1465	3.73267	*
chr1	31181000	31181260	C42B_NDR_1466	7.32128	*
chr1	31186380	31186560	C42B_NDR_1467	5.15967	*
chr1	31190860	31191480	C42B_NDR_1468	9.74545	*
chr1	31191540	31191720	C42B_NDR_1469	6.78244	*
chr1	31195080	31195220	C42B_NDR_1470	5.94132	*
chr1	31215260	31215400	C42B_NDR_1471	4.12279	*
chr1	31220220	31220380	C42B_NDR_1472	5.31312	*
chr1	31228640	31228780	C42B_NDR_1473	5.19487	*
chr1	31252600	31252780	C42B_NDR_1474	5.28224	*
chr1	31270560	31270720	C42B_NDR_1475	4.53464	*
chr1	31279240	31279380	C42B_NDR_1476	4.96499	*
chr1	31296840	31297040	C42B_NDR_1477	11.9868	*
chr1	31297240	31297380	C42B_NDR_1478	5.92556	*
chr1	31388420	31388560	C42B_NDR_1479	4.24829	*
chr1	31457520	31457660	C42B_NDR_1480	4.37945	*
chr1	31497560	31497780	C42B_NDR_1481	9.71249	*
chr1	31535440	31535580	C42B_NDR_1482	4.78728	*
chr1	31538260	31538420	C42B_NDR_1483	6.19972	*
chr1	31538460	31538860	C42B_NDR_1484	14.9043	*
chr1	31559360	31559500	C42B_NDR_1485	4.58322	*
chr1	31560860	31561020	C42B_NDR_1486	4.1941	*
chr1	31627820	31628000	C42B_NDR_1487	7.13203	*
chr1	31628260	31628400	C42B_NDR_1488	5.12782	*
chr1	31643560	31644020	C42B_NDR_1489	8.72769	*
chr1	31658620	31658840	C42B_NDR_1490	13.0678	*
chr1	31669680	31669820	C42B_NDR_1491	5.01088	*
chr1	31712380	31712560	C42B_NDR_1492	6.16503	*
chr1	31716200	31716520	C42B_NDR_1493	7.07217	*
chr1	31731600	31731740	C42B_NDR_1494	6.41461	*
chr1	31736320	31736480	C42B_NDR_1495	4.65061	*
chr1	31769520	31769920	C42B_NDR_1496	10.8421	*
chr1	31807920	31808100	C42B_NDR_1497	6.58998	*
chr1	31862900	31863080	C42B_NDR_1498	6.26195	*
chr1	31867540	31867780	C42B_NDR_1499	5.0418	*
chr1	31889240	31889500	C42B_NDR_1500	7.12123	*
chr1	31895420	31895560	C42B_NDR_1501	5.05082	*
chr1	31895940	31896080	C42B_NDR_1502	3.58526	*
chr1	31944580	31944800	C42B_NDR_1503	7.75015	*
chr1	31965480	31965640	C42B_NDR_1504	3.787	*
chr1	31976000	31976140	C42B_NDR_1505	5.91919	*
chr1	32014540	32014700	C42B_NDR_1506	5.47662	*
chr1	32049860	32050020	C42B_NDR_1507	4.6997	*
chr1	32059660	32059900	C42B_NDR_1508	5.23363	*
chr1	32110420	32110640	C42B_NDR_1509	9.20232	*
chr1	32127120	32127280	C42B_NDR_1510	4.66866	*
chr1	32135580	32135720	C42B_NDR_1511	5.38942	*
chr1	32136060	32136220	C42B_NDR_1512	6.11066	*
chr1	32154180	32154340	C42B_NDR_1513	6.04267	*
chr1	32161980	32162120	C42B_NDR_1514	5.11569	*
chr1	32170320	32170520	C42B_NDR_1515	12.4764	*
chr1	32183460	32183600	C42B_NDR_1516	6.1234	*
chr1	32192000	32192160	C42B_NDR_1517	4.85548	*
chr1	32228400	32228560	C42B_NDR_1518	5.80628	*
chr1	32229640	32229780	C42B_NDR_1519	5.1946	*
chr1	32235720	32235880	C42B_NDR_1520	4.19662	*
chr1	32253720	32253900	C42B_NDR_1521	4.972	*
chr1	32254160	32254380	C42B_NDR_1522	8.75301	*
chr1	32254660	32254820	C42B_NDR_1523	5.84614	*
chr1	32254840	32255060	C42B_NDR_1524	6.54078	*
chr1	32279780	32279920	C42B_NDR_1525	5.11531	*
chr1	32308560	32308740	C42B_NDR_1526	6.91474	*
chr1	32346220	32346400	C42B_NDR_1527	6.01676	*
chr1	32363280	32363420	C42B_NDR_1528	6.29986	*
chr1	32376640	32376820	C42B_NDR_1529	6.49292	*
chr1	32403620	32404320	C42B_NDR_1530	14.034	*
chr1	32429740	32429960	C42B_NDR_1531	7.02872	*
chr1	32479340	32479560	C42B_NDR_1532	11.3093	*
chr1	32480140	32480280	C42B_NDR_1533	4.57688	*
chr1	32538400	32538600	C42B_NDR_1534	9.76301	*
chr1	32573440	32573780	C42B_NDR_1535	11.4926	*
chr1	32574160	32574340	C42B_NDR_1536	4.56903	*
chr1	32575000	32575160	C42B_NDR_1537	5.83378	*
chr1	32608440	32608620	C42B_NDR_1538	8.53941	*
chr1	32645100	32645420	C42B_NDR_1539	16.6178	*
chr1	32666320	32666480	C42B_NDR_1540	6.0542	*
chr1	32687800	32688100	C42B_NDR_1541	8.72032	*
chr1	32705900	32706180	C42B_NDR_1542	10.1324	*
chr1	32713800	32714020	C42B_NDR_1543	10.0332	*
chr1	32741120	32741300	C42B_NDR_1544	6.22127	*
chr1	32757500	32757800	C42B_NDR_1545	11.194	*
chr1	32758060	32758240	C42B_NDR_1546	5.13936	*
chr1	32775680	32775860	C42B_NDR_1547	6.53011	*
chr1	32782140	32782400	C42B_NDR_1548	7.63873	*
chr1	32787340	32787520	C42B_NDR_1549	6.50513	*
chr1	32787540	32787680	C42B_NDR_1550	4.59197	*
chr1	32797860	32798020	C42B_NDR_1551	4.14784	*
chr1	32798040	32798200	C42B_NDR_1552	5.90426	*
chr1	32798720	32798880	C42B_NDR_1553	4.88741	*
chr1	32801240	32801460	C42B_NDR_1554	6.89575	*
chr1	32816940	32817240	C42B_NDR_1555	7.46848	*
chr1	32859940	32860220	C42B_NDR_1556	10.0256	*
chr1	32860240	32860420	C42B_NDR_1557	7.46299	*
chr1	32866480	32866740	C42B_NDR_1558	8.459	*
chr1	32872260	32872400	C42B_NDR_1559	5.57212	*
chr1	32914060	32914260	C42B_NDR_1560	8.70598	*
chr1	32936580	32936740	C42B_NDR_1561	5.47905	*
chr1	32967580	32967740	C42B_NDR_1562	6.19988	*
chr1	32967760	32967940	C42B_NDR_1563	6.95805	*
chr1	32986080	32986240	C42B_NDR_1564	6.03092	*
chr1	32986260	32986400	C42B_NDR_1565	4.44568	*
chr1	33077760	33077900	C42B_NDR_1566	5.74674	*
chr1	33077920	33078060	C42B_NDR_1567	6.34696	*
chr1	33142620	33142780	C42B_NDR_1568	5.67486	*
chr1	33160800	33160940	C42B_NDR_1569	5.81763	*
chr1	33167100	33167240	C42B_NDR_1570	5.58516	*
chr1	33181820	33181980	C42B_NDR_1571	5.44882	*
chr1	33182280	33182580	C42B_NDR_1572	10.6453	*
chr1	33207260	33207500	C42B_NDR_1573	7.11943	*
chr1	33214740	33214920	C42B_NDR_1574	5.24106	*
chr1	33219320	33219680	C42B_NDR_1575	11.0583	*
chr1	33228980	33229160	C42B_NDR_1576	7.52631	*
chr1	33238640	33238800	C42B_NDR_1577	5.64735	*
chr1	33279440	33279600	C42B_NDR_1578	3.97204	*
chr1	33282980	33283200	C42B_NDR_1579	8.87493	*
chr1	33283880	33284040	C42B_NDR_1580	6.04628	*
chr1	33335620	33335800	C42B_NDR_1581	6.33053	*
chr1	33336220	33336380	C42B_NDR_1582	6.04839	*
chr1	33342380	33342560	C42B_NDR_1583	6.4932	*
chr1	33344180	33344340	C42B_NDR_1584	4.64593	*
chr1	33345860	33346000	C42B_NDR_1585	3.6089	*
chr1	33361240	33361380	C42B_NDR_1586	6.57107	*
chr1	33365500	33365640	C42B_NDR_1587	5.44735	*
chr1	33366780	33366960	C42B_NDR_1588	6.43963	*
chr1	33367000	33367200	C42B_NDR_1589	6.75968	*
chr1	33370200	33370380	C42B_NDR_1590	5.90908	*
chr1	33399680	33399820	C42B_NDR_1591	5.57284	*
chr1	33430380	33430660	C42B_NDR_1592	10.8582	*
chr1	33446720	33447080	C42B_NDR_1593	11.1386	*
chr1	33474380	33474560	C42B_NDR_1594	6.24006	*
chr1	33476940	33477160	C42B_NDR_1595	10.7065	*
chr1	33502480	33502820	C42B_NDR_1596	9.47303	*
chr1	33546560	33546760	C42B_NDR_1597	6.96302	*
chr1	33552000	33552260	C42B_NDR_1598	8.8349	*
chr1	33558440	33558580	C42B_NDR_1599	4.00774	*
chr1	33560480	33560620	C42B_NDR_1600	4.2436	*
chr1	33577680	33577860	C42B_NDR_1601	4.81937	*
chr1	33592780	33592960	C42B_NDR_1602	4.82947	*
chr1	33592980	33593140	C42B_NDR_1603	5.32436	*
chr1	33615480	33615820	C42B_NDR_1604	14.7061	*
chr1	33637440	33637600	C42B_NDR_1605	4.86492	*
chr1	33646380	33646700	C42B_NDR_1606	8.62391	*
chr1	33646760	33646960	C42B_NDR_1607	6.98148	*
chr1	33647000	33647140	C42B_NDR_1608	5.15787	*
chr1	33647580	33647840	C42B_NDR_1609	7.15272	*
chr1	33721480	33721660	C42B_NDR_1610	5.077	*
chr1	33727360	33727540	C42B_NDR_1611	6.75635	*
chr1	33761240	33761420	C42B_NDR_1612	9.16561	*
chr1	33832700	33832840	C42B_NDR_1613	4.62085	*
chr1	33833400	33833660	C42B_NDR_1614	9.47513	*
chr1	33837880	33838060	C42B_NDR_1615	6.84494	*
chr1	33842760	33842900	C42B_NDR_1616	5.0212	*
chr1	33890140	33890280	C42B_NDR_1617	4.40969	*
chr1	33896060	33896220	C42B_NDR_1618	6.02743	*
chr1	33896240	33896400	C42B_NDR_1619	5.8089	*
chr1	33896460	33896700	C42B_NDR_1620	7.43302	*
chr1	33896720	33896900	C42B_NDR_1621	6.78039	*
chr1	33936120	33936420	C42B_NDR_1622	6.94473	*
chr1	33937940	33938320	C42B_NDR_1623	9.22705	*
chr1	34040500	34040640	C42B_NDR_1624	3.87265	*
chr1	34078600	34078760	C42B_NDR_1625	4.32269	*
chr1	34098740	34098940	C42B_NDR_1626	7.945	*
chr1	34106860	34107040	C42B_NDR_1627	6.73314	*
chr1	34108920	34109200	C42B_NDR_1628	7.93574	*
chr1	34125960	34126160	C42B_NDR_1629	8.74627	*
chr1	34185720	34185900	C42B_NDR_1630	6.70306	*
chr1	34250060	34250220	C42B_NDR_1631	4.34264	*
chr1	34284620	34284760	C42B_NDR_1632	3.98262	*
chr1	34396000	34396140	C42B_NDR_1633	4.27484	*
chr1	34438680	34438900	C42B_NDR_1634	7.84096	*
chr1	34529180	34529340	C42B_NDR_1635	3.78713	*
chr1	34628840	34629020	C42B_NDR_1636	7.35947	*
chr1	34629600	34629800	C42B_NDR_1637	11.8491	*
chr1	34630480	34630640	C42B_NDR_1638	6.52271	*
chr1	34650860	34651000	C42B_NDR_1639	3.7608	*
chr1	34655360	34655500	C42B_NDR_1640	4.54835	*
chr1	34772080	34772240	C42B_NDR_1641	4.4342	*
chr1	34872160	34872300	C42B_NDR_1642	5.34363	*
chr1	34925920	34926140	C42B_NDR_1643	7.46634	*
chr1	34966120	34966340	C42B_NDR_1644	5.03691	*
chr1	34996280	34996460	C42B_NDR_1645	6.90375	*
chr1	35063540	35063700	C42B_NDR_1646	7.74346	*
chr1	35147200	35147400	C42B_NDR_1647	7.65188	*
chr1	35190900	35191060	C42B_NDR_1648	4.44985	*
chr1	35208320	35208580	C42B_NDR_1649	13.6938	*
chr1	35229320	35229460	C42B_NDR_1650	3.62246	*
chr1	35252120	35252360	C42B_NDR_1651	5.40953	*
chr1	35317160	35317360	C42B_NDR_1652	12.417	*
chr1	35318400	35318620	C42B_NDR_1653	4.8754	*
chr1	35325260	35325540	C42B_NDR_1654	10.6346	*
chr1	35329020	35329160	C42B_NDR_1655	3.89308	*
chr1	35344940	35345080	C42B_NDR_1656	4.51923	*
chr1	35390480	35390680	C42B_NDR_1657	5.87122	*
chr1	35450860	35451020	C42B_NDR_1658	5.54152	*
chr1	35476500	35476680	C42B_NDR_1659	7.35205	*
chr1	35497240	35497440	C42B_NDR_1660	7.55776	*
chr1	35497480	35497660	C42B_NDR_1661	6.55673	*
chr1	35657620	35657820	C42B_NDR_1662	5.76079	*
chr1	35658880	35659080	C42B_NDR_1663	7.15758	*
chr1	35667780	35668040	C42B_NDR_1664	13.959	*
chr1	35899500	35899640	C42B_NDR_1665	4.24943	*
chr1	35916680	35916900	C42B_NDR_1666	10.0106	*
chr1	35917660	35917840	C42B_NDR_1667	5.82695	*
chr1	35965900	35966040	C42B_NDR_1668	5.00983	*
chr1	36019940	36020160	C42B_NDR_1669	8.21821	*
chr1	36022900	36023060	C42B_NDR_1670	6.20384	*
chr1	36023180	36023480	C42B_NDR_1671	9.06821	*
chr1	36026480	36026720	C42B_NDR_1672	21.0246	*
chr1	36030300	36030480	C42B_NDR_1673	4.42685	*
chr1	36034680	36034820	C42B_NDR_1674	5.48931	*
chr1	36047340	36047520	C42B_NDR_1675	5.98931	*
chr1	36103020	36103160	C42B_NDR_1676	4.09058	*
chr1	36106840	36106980	C42B_NDR_1677	3.92419	*
chr1	36107040	36107320	C42B_NDR_1678	14.4439	*
chr1	36107520	36107680	C42B_NDR_1679	5.55421	*
chr1	36122160	36122320	C42B_NDR_1680	4.29413	*
chr1	36145760	36145900	C42B_NDR_1681	4.35228	*
chr1	36181260	36181420	C42B_NDR_1682	6.87044	*
chr1	36235020	36235160	C42B_NDR_1683	5.41484	*
chr1	36235460	36235800	C42B_NDR_1684	12.9786	*
chr1	36240140	36240300	C42B_NDR_1685	3.86839	*
chr1	36273880	36274040	C42B_NDR_1686	5.262	*
chr1	36342660	36342840	C42B_NDR_1687	6.99317	*
chr1	36348580	36348760	C42B_NDR_1688	7.91581	*
chr1	36396620	36396940	C42B_NDR_1689	11.0993	*
chr1	36554400	36554580	C42B_NDR_1690	6.51321	*
chr1	36557000	36557140	C42B_NDR_1691	4.0115	*
chr1	36565240	36565420	C42B_NDR_1692	8.41489	*
chr1	36615100	36615340	C42B_NDR_1693	10.3452	*
chr1	36616500	36616720	C42B_NDR_1694	9.11669	*
chr1	36626620	36626760	C42B_NDR_1695	3.79987	*
chr1	36627000	36627160	C42B_NDR_1696	5.3655	*
chr1	36627200	36627440	C42B_NDR_1697	9.53302	*
chr1	36629180	36629340	C42B_NDR_1698	5.36634	*
chr1	36653820	36654040	C42B_NDR_1699	6.34771	*
chr1	36689640	36690120	C42B_NDR_1700	13.4621	*
chr1	36696860	36697120	C42B_NDR_1701	8.50419	*
chr1	36724060	36724200	C42B_NDR_1702	4.51489	*
chr1	36724280	36724500	C42B_NDR_1703	7.63564	*
chr1	36724660	36724840	C42B_NDR_1704	6.33221	*
chr1	36735160	36735380	C42B_NDR_1705	7.37276	*
chr1	36762800	36762960	C42B_NDR_1706	5.06723	*
chr1	36765520	36765780	C42B_NDR_1707	7.0572	*
chr1	36772500	36772740	C42B_NDR_1708	9.57919	*
chr1	36794460	36794680	C42B_NDR_1709	8.57445	*
chr1	36840540	36840700	C42B_NDR_1710	5.00612	*
chr1	36850620	36850840	C42B_NDR_1711	9.8639	*
chr1	36851480	36851660	C42B_NDR_1712	6.60618	*
chr1	36851700	36851860	C42B_NDR_1713	6.06973	*
chr1	36852080	36852220	C42B_NDR_1714	5.89955	*
chr1	36852380	36852540	C42B_NDR_1715	5.45427	*
chr1	36863420	36863660	C42B_NDR_1716	8.09177	*
chr1	36878100	36878280	C42B_NDR_1717	4.50249	*
chr1	36915960	36916100	C42B_NDR_1718	4.51901	*
chr1	36916380	36916520	C42B_NDR_1719	4.10573	*
chr1	36929980	36930160	C42B_NDR_1720	8.01448	*
chr1	36937200	36937360	C42B_NDR_1721	4.2982	*
chr1	36940120	36940260	C42B_NDR_1722	3.46865	*
chr1	36979380	36979520	C42B_NDR_1723	4.45837	*
chr1	36981960	36982260	C42B_NDR_1724	9.89819	*
chr1	36986660	36986860	C42B_NDR_1725	6.30724	*
chr1	37019500	37019660	C42B_NDR_1726	7.09642	*
chr1	37033140	37033300	C42B_NDR_1727	4.73112	*
chr1	37104880	37105020	C42B_NDR_1728	4.8136	*
chr1	37135320	37135460	C42B_NDR_1729	4.01363	*
chr1	37164880	37165060	C42B_NDR_1730	8.19065	*
chr1	37169440	37169620	C42B_NDR_1731	7.68341	*
chr1	37229660	37229820	C42B_NDR_1732	4.30273	*
chr1	37236980	37237120	C42B_NDR_1733	4.29132	*
chr1	37241800	37241940	C42B_NDR_1734	4.10214	*
chr1	37253100	37253240	C42B_NDR_1735	4.52965	*
chr1	37284000	37284140	C42B_NDR_1736	6.16272	*
chr1	37297940	37298100	C42B_NDR_1737	5.15657	*
chr1	37311580	37311720	C42B_NDR_1738	3.66452	*
chr1	37315660	37315820	C42B_NDR_1739	5.17028	*
chr1	37386580	37386720	C42B_NDR_1740	4.19483	*
chr1	37389900	37390100	C42B_NDR_1741	5.87177	*
chr1	37423560	37423720	C42B_NDR_1742	4.12476	*
chr1	37425440	37425580	C42B_NDR_1743	3.27442	*
chr1	37432000	37432180	C42B_NDR_1744	3.64712	*
chr1	37454040	37454200	C42B_NDR_1745	5.04616	*
chr1	37491260	37491420	C42B_NDR_1746	3.91097	*
chr1	37494680	37494860	C42B_NDR_1747	5.90455	*
chr1	37550560	37550700	C42B_NDR_1748	5.75902	*
chr1	37565700	37565840	C42B_NDR_1749	5.38177	*
chr1	37576680	37576840	C42B_NDR_1750	6.14466	*
chr1	37597500	37597640	C42B_NDR_1751	5.13396	*
chr1	37600420	37600580	C42B_NDR_1752	4.61965	*
chr1	37721200	37721340	C42B_NDR_1753	4.23647	*
chr1	37752260	37752400	C42B_NDR_1754	5.22112	*
chr1	37772180	37772340	C42B_NDR_1755	6.5055	*
chr1	37885800	37885940	C42B_NDR_1756	4.3412	*
chr1	37914800	37914960	C42B_NDR_1757	6.52275	*
chr1	37937360	37937540	C42B_NDR_1758	5.73136	*
chr1	37939940	37940200	C42B_NDR_1759	9.90485	*
chr1	37942560	37942700	C42B_NDR_1760	4.63515	*
chr1	37945320	37945460	C42B_NDR_1761	5.61391	*
chr1	37948800	37948960	C42B_NDR_1762	4.35091	*
chr1	37953040	37953200	C42B_NDR_1763	6.1193	*
chr1	37963520	37963720	C42B_NDR_1764	7.81137	*
chr1	37964720	37964940	C42B_NDR_1765	8.80405	*
chr1	37965020	37965200	C42B_NDR_1766	8.8684	*
chr1	37979460	37979620	C42B_NDR_1767	4.95452	*
chr1	38061440	38061760	C42B_NDR_1768	10.5163	*
chr1	38091860	38092000	C42B_NDR_1769	3.82761	*
chr1	38127400	38127560	C42B_NDR_1770	4.45485	*
chr1	38148120	38148260	C42B_NDR_1771	5.12909	*
chr1	38156140	38156520	C42B_NDR_1772	10.0686	*
chr1	38157100	38157240	C42B_NDR_1773	3.96553	*
chr1	38157920	38158240	C42B_NDR_1774	9.76408	*
chr1	38217660	38217800	C42B_NDR_1775	4.32786	*
chr1	38218520	38218700	C42B_NDR_1776	7.27107	*
chr1	38230080	38230240	C42B_NDR_1777	4.46728	*
chr1	38259720	38259920	C42B_NDR_1778	7.19266	*
chr1	38260020	38260180	C42B_NDR_1779	3.48311	*
chr1	38273300	38273460	C42B_NDR_1780	6.56339	*
chr1	38273780	38274000	C42B_NDR_1781	7.86082	*
chr1	38274840	38274980	C42B_NDR_1782	4.61528	*
chr1	38325160	38325320	C42B_NDR_1783	5.90266	*
chr1	38325900	38326080	C42B_NDR_1784	5.5611	*
chr1	38397320	38397520	C42B_NDR_1785	10.339	*
chr1	38397540	38397740	C42B_NDR_1786	9.37363	*
chr1	38405720	38405880	C42B_NDR_1787	5.55592	*
chr1	38406160	38406300	C42B_NDR_1788	4.40066	*
chr1	38414600	38414740	C42B_NDR_1789	4.01731	*
chr1	38460440	38460600	C42B_NDR_1790	3.8209	*
chr1	38471040	38471220	C42B_NDR_1791	6.96134	*
chr1	38478000	38478460	C42B_NDR_1792	8.91738	*
chr1	38478820	38479000	C42B_NDR_1793	7.72152	*
chr1	38511180	38511340	C42B_NDR_1794	4.71119	*
chr1	38512220	38512380	C42B_NDR_1795	5.76171	*
chr1	38512420	38512700	C42B_NDR_1796	19.7899	*
chr1	38568360	38568540	C42B_NDR_1797	6.86343	*
chr1	38594200	38594380	C42B_NDR_1798	5.48494	*
chr1	38608420	38608680	C42B_NDR_1799	7.36732	*
chr1	38618500	38618660	C42B_NDR_1800	4.25449	*
chr1	38680100	38680280	C42B_NDR_1801	5.54414	*
chr1	38683620	38683760	C42B_NDR_1802	4.68938	*
chr1	38694460	38694640	C42B_NDR_1803	7.10848	*
chr1	38735360	38735500	C42B_NDR_1804	4.63647	*
chr1	38906780	38906940	C42B_NDR_1805	4.78295	*
chr1	38950540	38950720	C42B_NDR_1806	5.8703	*
chr1	38955620	38955780	C42B_NDR_1807	4.83326	*
chr1	38993080	38993260	C42B_NDR_1808	4.98073	*
chr1	39030660	39030820	C42B_NDR_1809	5.95701	*
chr1	39061740	39061880	C42B_NDR_1810	3.98589	*
chr1	39191040	39191220	C42B_NDR_1811	6.20195	*
chr1	39269740	39269940	C42B_NDR_1812	7.01191	*
chr1	39273420	39273560	C42B_NDR_1813	4.63337	*
chr1	39283960	39284120	C42B_NDR_1814	3.90156	*
chr1	39300960	39301260	C42B_NDR_1815	9.0693	*
chr1	39325440	39325720	C42B_NDR_1816	12.0803	*
chr1	39328800	39329020	C42B_NDR_1817	9.15043	*
chr1	39338560	39338700	C42B_NDR_1818	4.49009	*
chr1	39338720	39338880	C42B_NDR_1819	5.63256	*
chr1	39338900	39339040	C42B_NDR_1820	4.06607	*
chr1	39339080	39339260	C42B_NDR_1821	5.11545	*
chr1	39407480	39407720	C42B_NDR_1822	7.85657	*
chr1	39416960	39417140	C42B_NDR_1823	6.34612	*
chr1	39429780	39429960	C42B_NDR_1824	6.20312	*
chr1	39452380	39452640	C42B_NDR_1825	7.06034	*
chr1	39456740	39457060	C42B_NDR_1826	7.73513	*
chr1	39491980	39492140	C42B_NDR_1827	7.42978	*
chr1	39492160	39492300	C42B_NDR_1828	3.8686	*
chr1	39542220	39542460	C42B_NDR_1829	10.6798	*
chr1	39547180	39547360	C42B_NDR_1830	5.47809	*
chr1	39558120	39558260	C42B_NDR_1831	5.57081	*
chr1	39564360	39564620	C42B_NDR_1832	9.95119	*
chr1	39568380	39568520	C42B_NDR_1833	4.93576	*
chr1	39570920	39571140	C42B_NDR_1834	8.23536	*
chr1	39571360	39571500	C42B_NDR_1835	4.69849	*
chr1	39582620	39582860	C42B_NDR_1836	12.0045	*
chr1	39582940	39583120	C42B_NDR_1837	6.07611	*
chr1	39594760	39594900	C42B_NDR_1838	5.89657	*
chr1	39598880	39599100	C42B_NDR_1839	6.50593	*
chr1	39623920	39624240	C42B_NDR_1840	11.8425	*
chr1	39644720	39644880	C42B_NDR_1841	4.09643	*
chr1	39657360	39657520	C42B_NDR_1842	5.19585	*
chr1	39844100	39844280	C42B_NDR_1843	6.03443	*
chr1	39851220	39851380	C42B_NDR_1844	5.30337	*
chr1	39861160	39861320	C42B_NDR_1845	5.3353	*
chr1	39873540	39873720	C42B_NDR_1846	4.92711	*
chr1	39874380	39874680	C42B_NDR_1847	6.90602	*
chr1	39874760	39874920	C42B_NDR_1848	5.62576	*
chr1	39876620	39876800	C42B_NDR_1849	7.1617	*
chr1	39957120	39957420	C42B_NDR_1850	9.365	*
chr1	39961480	39961640	C42B_NDR_1851	4.66051	*
chr1	39993000	39993140	C42B_NDR_1852	5.27725	*
chr1	40004920	40005120	C42B_NDR_1853	7.63539	*
chr1	40010020	40010220	C42B_NDR_1854	5.78591	*
chr1	40042460	40042740	C42B_NDR_1855	8.35711	*
chr1	40071960	40072100	C42B_NDR_1856	5.1737	*
chr1	40119260	40119640	C42B_NDR_1857	8.21968	*
chr1	40144460	40144620	C42B_NDR_1858	6.56624	*
chr1	40156960	40157260	C42B_NDR_1859	9.24798	*
chr1	40204340	40204660	C42B_NDR_1860	7.11725	*
chr1	40205040	40205180	C42B_NDR_1861	4.11698	*
chr1	40254240	40254380	C42B_NDR_1862	4.60969	*
chr1	40254720	40254900	C42B_NDR_1863	6.07707	*
chr1	40283100	40283300	C42B_NDR_1864	10.0355	*
chr1	40309060	40309200	C42B_NDR_1865	4.44311	*
chr1	40316380	40316560	C42B_NDR_1866	9.64595	*
chr1	40337540	40337720	C42B_NDR_1867	7.07264	*
chr1	40342880	40343240	C42B_NDR_1868	7.87784	*
chr1	40349060	40349340	C42B_NDR_1869	9.5172	*
chr1	40367240	40367460	C42B_NDR_1870	10.649	*
chr1	40367580	40367820	C42B_NDR_1871	9.03908	*
chr1	40399880	40400060	C42B_NDR_1872	8.26842	*
chr1	40420580	40420960	C42B_NDR_1873	17.5996	*
chr1	40425420	40425560	C42B_NDR_1874	5.96679	*
chr1	40426240	40426400	C42B_NDR_1875	6.40597	*
chr1	40439220	40439380	C42B_NDR_1876	5.16125	*
chr1	40447840	40447980	C42B_NDR_1877	3.94759	*
chr1	40454420	40454600	C42B_NDR_1878	5.25598	*
chr1	40502380	40502520	C42B_NDR_1879	4.7512	*
chr1	40506040	40506500	C42B_NDR_1880	12.3887	*
chr1	40562820	40563080	C42B_NDR_1881	13.6831	*
chr1	40618760	40618980	C42B_NDR_1882	7.03325	*
chr1	40723600	40724000	C42B_NDR_1883	7.53023	*
chr1	40747560	40747740	C42B_NDR_1884	6.07024	*
chr1	40804520	40804660	C42B_NDR_1885	5.45758	*
chr1	40839140	40839280	C42B_NDR_1886	4.62486	*
chr1	40840460	40840620	C42B_NDR_1887	5.99909	*
chr1	40848400	40848600	C42B_NDR_1888	8.76506	*
chr1	40850160	40850380	C42B_NDR_1889	11.5828	*
chr1	40870560	40870820	C42B_NDR_1890	7.92227	*
chr1	40904120	40904260	C42B_NDR_1891	4.85536	*
chr1	40915620	40915880	C42B_NDR_1892	9.47561	*
chr1	40974540	40974720	C42B_NDR_1893	6.3099	*
chr1	40997120	40997340	C42B_NDR_1894	10.5489	*
chr1	41057880	41058040	C42B_NDR_1895	7.03784	*
chr1	41077980	41078140	C42B_NDR_1896	4.72492	*
chr1	41115080	41115220	C42B_NDR_1897	5.64015	*
chr1	41134600	41134780	C42B_NDR_1898	7.53552	*
chr1	41157120	41157360	C42B_NDR_1899	7.59861	*
chr1	41157720	41157880	C42B_NDR_1900	5.1915	*
chr1	41239920	41240080	C42B_NDR_1901	5.45899	*
chr1	41246600	41246780	C42B_NDR_1902	8.98684	*
chr1	41249360	41249520	C42B_NDR_1903	6.29948	*
chr1	41249880	41250100	C42B_NDR_1904	9.94515	*
chr1	41254240	41254420	C42B_NDR_1905	5.68642	*
chr1	41282220	41282360	C42B_NDR_1906	3.45041	*
chr1	41298080	41298220	C42B_NDR_1907	4.03467	*
chr1	41314260	41314520	C42B_NDR_1908	5.92696	*
chr1	41321280	41321420	C42B_NDR_1909	4.24634	*
chr1	41328020	41328300	C42B_NDR_1910	7.61422	*
chr1	41328580	41328780	C42B_NDR_1911	9.97065	*
chr1	41347080	41347220	C42B_NDR_1912	4.28579	*
chr1	41391900	41392040	C42B_NDR_1913	4.07064	*
chr1	41395720	41395880	C42B_NDR_1914	4.35629	*
chr1	41418140	41418460	C42B_NDR_1915	11.4699	*
chr1	41445180	41445420	C42B_NDR_1916	6.25642	*
chr1	41445500	41445780	C42B_NDR_1917	8.6064	*
chr1	41446440	41446720	C42B_NDR_1918	7.00716	*
chr1	41469460	41469660	C42B_NDR_1919	8.4727	*
chr1	41511640	41511800	C42B_NDR_1920	5.20753	*
chr1	41512140	41512280	C42B_NDR_1921	5.64371	*
chr1	41575100	41575280	C42B_NDR_1922	6.86206	*
chr1	41671460	41671620	C42B_NDR_1923	4.51807	*
chr1	41682140	41682280	C42B_NDR_1924	6.14964	*
chr1	41705920	41706160	C42B_NDR_1925	8.16161	*
chr1	41707660	41707800	C42B_NDR_1926	6.61451	*
chr1	41707920	41708120	C42B_NDR_1927	7.77025	*
chr1	41733980	41734160	C42B_NDR_1928	7.97318	*
chr1	41819540	41819680	C42B_NDR_1929	5.68106	*
chr1	41826960	41827200	C42B_NDR_1930	9.76839	*
chr1	41835040	41835200	C42B_NDR_1931	5.07623	*
chr1	41837580	41837720	C42B_NDR_1932	4.63553	*
chr1	41846860	41847040	C42B_NDR_1933	5.5053	*
chr1	41853400	41853560	C42B_NDR_1934	6.81631	*
chr1	41859420	41859560	C42B_NDR_1935	3.54228	*
chr1	41872060	41872200	C42B_NDR_1936	4.83985	*
chr1	41884640	41884780	C42B_NDR_1937	4.72629	*
chr1	41898440	41898600	C42B_NDR_1938	5.14506	*
chr1	41908660	41908900	C42B_NDR_1939	10.1786	*
chr1	41915220	41915480	C42B_NDR_1940	6.17948	*
chr1	41942480	41942760	C42B_NDR_1941	8.97802	*
chr1	41944740	41944960	C42B_NDR_1942	7.33442	*
chr1	41948120	41948300	C42B_NDR_1943	8.1909	*
chr1	41950160	41950320	C42B_NDR_1944	5.97009	*
chr1	41950340	41950500	C42B_NDR_1945	5.08623	*
chr1	41954160	41954340	C42B_NDR_1946	5.98751	*
chr1	41961960	41962140	C42B_NDR_1947	6.49538	*
chr1	41967380	41967580	C42B_NDR_1948	9.9455	*
chr1	41980800	41980960	C42B_NDR_1949	6.02226	*
chr1	41981760	41981920	C42B_NDR_1950	6.16568	*
chr1	42083840	42084060	C42B_NDR_1951	5.84566	*
chr1	42127400	42127560	C42B_NDR_1952	4.71935	*
chr1	42127780	42127960	C42B_NDR_1953	7.22521	*
chr1	42160920	42161140	C42B_NDR_1954	12.0015	*
chr1	42277800	42277960	C42B_NDR_1955	6.2375	*
chr1	42289180	42289340	C42B_NDR_1956	4.34012	*
chr1	42326460	42326660	C42B_NDR_1957	11.5339	*
chr1	42347840	42348020	C42B_NDR_1958	7.05684	*
chr1	42383700	42383860	C42B_NDR_1959	5.24011	*
chr1	42384280	42384460	C42B_NDR_1960	6.75423	*
chr1	42500860	42501060	C42B_NDR_1961	10.4779	*
chr1	42547200	42547340	C42B_NDR_1962	5.16275	*
chr1	42547820	42548000	C42B_NDR_1963	4.53707	*
chr1	42609060	42609200	C42B_NDR_1964	4.65477	*
chr1	42642660	42642900	C42B_NDR_1965	8.7882	*
chr1	42680300	42680440	C42B_NDR_1966	5.69522	*
chr1	42778320	42778480	C42B_NDR_1967	6.57575	*
chr1	42800780	42801100	C42B_NDR_1968	12.3794	*
chr1	42805920	42806220	C42B_NDR_1969	10.2627	*
chr1	42846300	42846540	C42B_NDR_1970	7.56312	*
chr1	42846600	42846780	C42B_NDR_1971	7.69658	*
chr1	42921620	42921800	C42B_NDR_1972	5.23124	*
chr1	42922100	42922300	C42B_NDR_1973	7.24231	*
chr1	42922540	42922740	C42B_NDR_1974	12.2037	*
chr1	42928660	42929000	C42B_NDR_1975	8.74053	*
chr1	43147760	43147980	C42B_NDR_1976	8.76978	*
chr1	43148700	43148860	C42B_NDR_1977	5.51416	*
chr1	43203020	43203240	C42B_NDR_1978	9.28422	*
chr1	43222780	43222960	C42B_NDR_1979	5.33255	*
chr1	43232180	43232520	C42B_NDR_1980	7.92564	*
chr1	43232720	43233040	C42B_NDR_1981	11.213	*
chr1	43254580	43254740	C42B_NDR_1982	5.05959	*
chr1	43312040	43312360	C42B_NDR_1983	8.68895	*
chr1	43312580	43312720	C42B_NDR_1984	5.66142	*
chr1	43379200	43379380	C42B_NDR_1985	4.4848	*
chr1	43388740	43388900	C42B_NDR_1986	4.60192	*
chr1	43389900	43390180	C42B_NDR_1987	7.90028	*
chr1	43390220	43390400	C42B_NDR_1988	8.96381	*
chr1	43397540	43397700	C42B_NDR_1989	5.01697	*
chr1	43404880	43405060	C42B_NDR_1990	5.26511	*
chr1	43409100	43409260	C42B_NDR_1991	6.32771	*
chr1	43409620	43409760	C42B_NDR_1992	3.52624	*
chr1	43410060	43410240	C42B_NDR_1993	7.19819	*
chr1	43414620	43414760	C42B_NDR_1994	4.4442	*
chr1	43423780	43424020	C42B_NDR_1995	7.00579	*
chr1	43501180	43501320	C42B_NDR_1996	4.44304	*
chr1	43505060	43505360	C42B_NDR_1997	8.78907	*
chr1	43522720	43522880	C42B_NDR_1998	5.87249	*
chr1	43532160	43532320	C42B_NDR_1999	4.6164	*
[truncated: 63,878 more rows]

## Sheet: Table S6B
Supplemental Table S6B. Nucleosome depleted regions in MCF-7
chr1	15300	15440	MCF-7_NDR_1	4.94693	*
chr1	15560	15760	MCF-7_NDR_2	10.373	*
chr1	127680	127860	MCF-7_NDR_3	5.81095	*
chr1	139080	139240	MCF-7_NDR_4	7.18866	*
chr1	248080	248260	MCF-7_NDR_5	5.47168	*
chr1	537460	537620	MCF-7_NDR_6	6.0666	*
chr1	565220	565420	MCF-7_NDR_7	9.82643	*
chr1	565600	565760	MCF-7_NDR_8	5.26615	*
chr1	566060	566400	MCF-7_NDR_9	9.26811	*
chr1	566660	566840	MCF-7_NDR_10	6.00266	*
chr1	566960	567560	MCF-7_NDR_11	83.4742	*
chr1	567660	568240	MCF-7_NDR_12	79.424	*
chr1	568540	568720	MCF-7_NDR_13	5.34033	*
chr1	569360	569620	MCF-7_NDR_14	7.51784	*
chr1	569640	569820	MCF-7_NDR_15	7.10599	*
chr1	569860	570060	MCF-7_NDR_16	7.00009	*
chr1	592280	592440	MCF-7_NDR_17	5.36204	*
chr1	628680	628820	MCF-7_NDR_18	3.83178	*
chr1	714140	714460	MCF-7_NDR_19	8.41083	*
chr1	781000	781380	MCF-7_NDR_20	12.4519	*
chr1	793400	793580	MCF-7_NDR_21	8.13971	*
chr1	795800	795940	MCF-7_NDR_22	4.18189	*
chr1	809880	810020	MCF-7_NDR_23	4.83952	*
chr1	810760	810900	MCF-7_NDR_24	5.26854	*
chr1	821900	822080	MCF-7_NDR_25	5.93919	*
chr1	843460	843620	MCF-7_NDR_26	4.3429	*
chr1	856180	856340	MCF-7_NDR_27	5.18323	*
chr1	856540	856680	MCF-7_NDR_28	5.77143	*
chr1	860100	860400	MCF-7_NDR_29	10.4787	*
chr1	861020	861200	MCF-7_NDR_30	5.49769	*
chr1	868480	868700	MCF-7_NDR_31	8.07941	*
chr1	875700	875860	MCF-7_NDR_32	5.79553	*
chr1	879820	879960	MCF-7_NDR_33	4.37202	*
chr1	894540	894880	MCF-7_NDR_34	10.0095	*
chr1	901420	901560	MCF-7_NDR_35	3.8254	*
chr1	901700	901840	MCF-7_NDR_36	5.021	*
chr1	905740	905900	MCF-7_NDR_37	6.14354	*
chr1	908820	908960	MCF-7_NDR_38	4.9838	*
chr1	936260	936400	MCF-7_NDR_39	5.13839	*
chr1	948660	948840	MCF-7_NDR_40	7.97764	*
chr1	954980	955240	MCF-7_NDR_41	9.87052	*
chr1	956520	956780	MCF-7_NDR_42	7.49573	*
chr1	960040	960240	MCF-7_NDR_43	8.05603	*
chr1	981980	982120	MCF-7_NDR_44	4.18788	*
chr1	993660	993820	MCF-7_NDR_45	4.87453	*
chr1	997760	997900	MCF-7_NDR_46	5.42744	*
chr1	999300	999440	MCF-7_NDR_47	5.85401	*
chr1	1003460	1003640	MCF-7_NDR_48	6.40372	*
chr1	1009260	1009420	MCF-7_NDR_49	5.21696	*
chr1	1009640	1009840	MCF-7_NDR_50	9.40267	*
chr1	1014820	1015060	MCF-7_NDR_51	8.41814	*
chr1	1015500	1015700	MCF-7_NDR_52	7.93672	*
chr1	1029460	1029600	MCF-7_NDR_53	4.95127	*
chr1	1050580	1050740	MCF-7_NDR_54	5.55283	*
chr1	1059900	1060080	MCF-7_NDR_55	8.66265	*
chr1	1068080	1068240	MCF-7_NDR_56	7.03573	*
chr1	1071020	1071180	MCF-7_NDR_57	4.17492	*
chr1	1081360	1081500	MCF-7_NDR_58	4.32417	*
chr1	1092800	1093100	MCF-7_NDR_59	8.89373	*
chr1	1094960	1095100	MCF-7_NDR_60	4.80824	*
chr1	1110580	1110740	MCF-7_NDR_61	5.45797	*
chr1	1111040	1111180	MCF-7_NDR_62	5.48532	*
chr1	1111500	1111860	MCF-7_NDR_63	8.95428	*
chr1	1115020	1115180	MCF-7_NDR_64	4.66613	*
chr1	1116080	1116240	MCF-7_NDR_65	5.33357	*
chr1	1166060	1166220	MCF-7_NDR_66	4.18867	*
chr1	1172900	1173060	MCF-7_NDR_67	6.23363	*
chr1	1173320	1173460	MCF-7_NDR_68	5.61733	*
chr1	1209140	1209300	MCF-7_NDR_69	6.11563	*
chr1	1225580	1225720	MCF-7_NDR_70	5.18132	*
chr1	1227260	1227440	MCF-7_NDR_71	7.43556	*
chr1	1236120	1236260	MCF-7_NDR_72	4.10427	*
chr1	1248700	1248860	MCF-7_NDR_73	7.08111	*
chr1	1253620	1253960	MCF-7_NDR_74	26.2927	*
chr1	1260140	1260300	MCF-7_NDR_75	5.01388	*
chr1	1260600	1260880	MCF-7_NDR_76	9.87515	*
chr1	1279820	1279960	MCF-7_NDR_77	5.34309	*
chr1	1280200	1280360	MCF-7_NDR_78	5.37343	*
chr1	1284460	1284620	MCF-7_NDR_79	6.50342	*
chr1	1334900	1335060	MCF-7_NDR_80	5.94441	*
chr1	1337500	1337680	MCF-7_NDR_81	7.51738	*
chr1	1341820	1342000	MCF-7_NDR_82	7.12683	*
chr1	1343200	1343380	MCF-7_NDR_83	8.23452	*
chr1	1354040	1354200	MCF-7_NDR_84	4.99019	*
chr1	1368640	1368840	MCF-7_NDR_85	6.74706	*
chr1	1368980	1369140	MCF-7_NDR_86	4.97399	*
chr1	1379460	1379600	MCF-7_NDR_87	6.09521	*
chr1	1383740	1383900	MCF-7_NDR_88	3.94746	*
chr1	1407000	1407240	MCF-7_NDR_89	6.86323	*
chr1	1408260	1408400	MCF-7_NDR_90	4.0343	*
chr1	1433180	1433340	MCF-7_NDR_91	3.89465	*
chr1	1446380	1446580	MCF-7_NDR_92	7.52563	*
chr1	1447280	1447460	MCF-7_NDR_93	6.49098	*
chr1	1486340	1486640	MCF-7_NDR_94	10.3352	*
chr1	1503280	1503440	MCF-7_NDR_95	6.33354	*
chr1	1509240	1509380	MCF-7_NDR_96	4.66238	*
chr1	1510220	1510440	MCF-7_NDR_97	6.28539	*
chr1	1539500	1539700	MCF-7_NDR_98	7.24348	*
chr1	1554360	1554520	MCF-7_NDR_99	4.88204	*
chr1	1608060	1608340	MCF-7_NDR_100	8.21511	*
chr1	1610140	1610300	MCF-7_NDR_101	5.58683	*
chr1	1617620	1618140	MCF-7_NDR_102	18.599	*
chr1	1618320	1618480	MCF-7_NDR_103	6.48648	*
chr1	1656000	1656140	MCF-7_NDR_104	6.06881	*
chr1	1672460	1672700	MCF-7_NDR_105	6.0847	*
chr1	1677120	1677280	MCF-7_NDR_106	5.33378	*
chr1	1684900	1685080	MCF-7_NDR_107	7.0616	*
chr1	1690200	1690680	MCF-7_NDR_108	19.2672	*
chr1	1694600	1694740	MCF-7_NDR_109	6.12677	*
chr1	1695820	1696000	MCF-7_NDR_110	8.85002	*
chr1	1707400	1707560	MCF-7_NDR_111	6.33446	*
chr1	1714460	1714760	MCF-7_NDR_112	13.3849	*
chr1	1720540	1720720	MCF-7_NDR_113	5.21976	*
chr1	1749580	1749720	MCF-7_NDR_114	4.62909	*
chr1	1785120	1785280	MCF-7_NDR_115	5.79281	*
chr1	1787180	1787340	MCF-7_NDR_116	5.14327	*
chr1	1790540	1791060	MCF-7_NDR_117	9.06875	*
chr1	1822440	1822740	MCF-7_NDR_118	6.95771	*
chr1	1837740	1837920	MCF-7_NDR_119	6.33287	*
chr1	1840760	1840920	MCF-7_NDR_120	5.98875	*
chr1	1850260	1850400	MCF-7_NDR_121	5.09544	*
chr1	1850540	1850740	MCF-7_NDR_122	8.62975	*
chr1	1855080	1855300	MCF-7_NDR_123	10.8383	*
chr1	1875480	1875640	MCF-7_NDR_124	5.2886	*
chr1	1900660	1900820	MCF-7_NDR_125	5.68545	*
chr1	1905180	1905320	MCF-7_NDR_126	4.75637	*
chr1	1920440	1920640	MCF-7_NDR_127	10.461	*
chr1	1933400	1933540	MCF-7_NDR_128	4.46489	*
chr1	1953820	1953980	MCF-7_NDR_129	5.8014	*
chr1	1958340	1958480	MCF-7_NDR_130	4.00015	*
chr1	1970660	1970800	MCF-7_NDR_131	4.00648	*
chr1	1972700	1972840	MCF-7_NDR_132	4.61905	*
chr1	1977920	1978240	MCF-7_NDR_133	7.75447	*
chr1	2036520	2036920	MCF-7_NDR_134	9.79516	*
chr1	2044420	2044620	MCF-7_NDR_135	7.90238	*
chr1	2064780	2064940	MCF-7_NDR_136	5.13612	*
chr1	2064960	2065140	MCF-7_NDR_137	6.57722	*
chr1	2067040	2067260	MCF-7_NDR_138	8.60441	*
chr1	2077200	2077340	MCF-7_NDR_139	4.02995	*
chr1	2090540	2090720	MCF-7_NDR_140	6.00989	*
chr1	2126100	2126240	MCF-7_NDR_141	5.61303	*
chr1	2130820	2131000	MCF-7_NDR_142	5.94582	*
chr1	2139720	2140080	MCF-7_NDR_143	8.84596	*
chr1	2144260	2144440	MCF-7_NDR_144	7.81767	*
chr1	2147000	2147160	MCF-7_NDR_145	4.85794	*
chr1	2152500	2152640	MCF-7_NDR_146	4.25343	*
chr1	2159020	2159160	MCF-7_NDR_147	6.41737	*
chr1	2159280	2159560	MCF-7_NDR_148	11.2793	*
chr1	2179920	2180080	MCF-7_NDR_149	6.88171	*
chr1	2182100	2182240	MCF-7_NDR_150	3.9147	*
chr1	2190560	2190740	MCF-7_NDR_151	5.63876	*
chr1	2206640	2206780	MCF-7_NDR_152	3.94614	*
chr1	2207620	2207800	MCF-7_NDR_153	4.99146	*
chr1	2221200	2221340	MCF-7_NDR_154	5.29245	*
chr1	2246300	2246460	MCF-7_NDR_155	5.61372	*
chr1	2261460	2261600	MCF-7_NDR_156	5.08923	*
chr1	2269500	2269660	MCF-7_NDR_157	4.14578	*
chr1	2270900	2271040	MCF-7_NDR_158	6.05896	*
chr1	2271320	2271460	MCF-7_NDR_159	4.12459	*
chr1	2273660	2273820	MCF-7_NDR_160	5.13679	*
chr1	2278200	2278340	MCF-7_NDR_161	4.02864	*
chr1	2288860	2289000	MCF-7_NDR_162	4.44424	*
chr1	2313760	2313900	MCF-7_NDR_163	6.85241	*
chr1	2322900	2323340	MCF-7_NDR_164	20.5108	*
chr1	2343940	2344080	MCF-7_NDR_165	6.72205	*
chr1	2349640	2349780	MCF-7_NDR_166	5.70282	*
chr1	2364660	2364860	MCF-7_NDR_167	6.2972	*
chr1	2365880	2366040	MCF-7_NDR_168	4.70625	*
chr1	2368040	2368220	MCF-7_NDR_169	7.61386	*
chr1	2377140	2377280	MCF-7_NDR_170	5.40644	*
chr1	2378240	2378400	MCF-7_NDR_171	7.06538	*
chr1	2381120	2381300	MCF-7_NDR_172	5.77378	*
chr1	2388980	2389140	MCF-7_NDR_173	4.65431	*
chr1	2414200	2414380	MCF-7_NDR_174	7.01377	*
chr1	2427800	2427940	MCF-7_NDR_175	4.46321	*
chr1	2433520	2433660	MCF-7_NDR_176	5.38242	*
chr1	2436760	2436920	MCF-7_NDR_177	6.27233	*
chr1	2457960	2458120	MCF-7_NDR_178	6.31404	*
chr1	2469040	2469220	MCF-7_NDR_179	7.4222	*
chr1	2477680	2477880	MCF-7_NDR_180	8.61527	*
chr1	2478340	2478520	MCF-7_NDR_181	6.65549	*
chr1	2486440	2486580	MCF-7_NDR_182	4.66517	*
chr1	2493880	2494020	MCF-7_NDR_183	4.92574	*
chr1	2517760	2518040	MCF-7_NDR_184	8.56317	*
chr1	2519480	2519660	MCF-7_NDR_185	6.76875	*
chr1	2525540	2525680	MCF-7_NDR_186	3.84151	*
chr1	2533900	2534080	MCF-7_NDR_187	5.37265	*
chr1	2534100	2534260	MCF-7_NDR_188	4.06421	*
chr1	2536160	2536320	MCF-7_NDR_189	6.20652	*
chr1	2701860	2702000	MCF-7_NDR_190	4.00799	*
chr1	2749160	2749300	MCF-7_NDR_191	4.79014	*
chr1	2777600	2777760	MCF-7_NDR_192	4.87659	*
chr1	2778220	2778360	MCF-7_NDR_193	4.62178	*
chr1	2785960	2786120	MCF-7_NDR_194	5.7874	*
chr1	2791180	2791360	MCF-7_NDR_195	8.25194	*
chr1	2826040	2826180	MCF-7_NDR_196	4.75148	*
chr1	2829860	2830000	MCF-7_NDR_197	4.35459	*
chr1	2831340	2831500	MCF-7_NDR_198	5.63402	*
chr1	2835800	2835960	MCF-7_NDR_199	5.53661	*
chr1	2843040	2843220	MCF-7_NDR_200	6.05795	*
chr1	2843500	2843640	MCF-7_NDR_201	6.07833	*
chr1	2843680	2843840	MCF-7_NDR_202	5.85924	*
chr1	2856060	2856240	MCF-7_NDR_203	5.291	*
chr1	2863980	2864140	MCF-7_NDR_204	4.97177	*
chr1	2889180	2889340	MCF-7_NDR_205	4.82991	*
chr1	2896280	2896420	MCF-7_NDR_206	4.12793	*
chr1	2920520	2920660	MCF-7_NDR_207	6.04912	*
chr1	2940720	2940880	MCF-7_NDR_208	5.82176	*
chr1	2977640	2977840	MCF-7_NDR_209	7.49375	*
chr1	2991580	2991740	MCF-7_NDR_210	7.20068	*
chr1	3003840	3003980	MCF-7_NDR_211	4.6625	*
chr1	3014600	3014760	MCF-7_NDR_212	4.32677	*
chr1	3018120	3018280	MCF-7_NDR_213	5.86929	*
chr1	3030260	3030440	MCF-7_NDR_214	8.64555	*
chr1	3100100	3100240	MCF-7_NDR_215	3.99057	*
chr1	3103100	3103300	MCF-7_NDR_216	7.15467	*
chr1	3108000	3108140	MCF-7_NDR_217	3.75552	*
chr1	3119240	3119380	MCF-7_NDR_218	5.55301	*
chr1	3130560	3130740	MCF-7_NDR_219	5.26589	*
chr1	3134040	3134200	MCF-7_NDR_220	5.11128	*
chr1	3138840	3139000	MCF-7_NDR_221	5.83109	*
chr1	3139660	3139800	MCF-7_NDR_222	3.64184	*
chr1	3155540	3155720	MCF-7_NDR_223	5.48268	*
chr1	3168780	3168940	MCF-7_NDR_224	4.82528	*
chr1	3191520	3191720	MCF-7_NDR_225	7.02828	*
chr1	3199520	3199660	MCF-7_NDR_226	4.88686	*
chr1	3200660	3200860	MCF-7_NDR_227	7.39569	*
chr1	3205260	3205400	MCF-7_NDR_228	4.88121	*
chr1	3207500	3207720	MCF-7_NDR_229	6.99513	*
chr1	3207880	3208020	MCF-7_NDR_230	4.35106	*
chr1	3211460	3211620	MCF-7_NDR_231	4.15557	*
chr1	3222160	3222320	MCF-7_NDR_232	5.55271	*
chr1	3226220	3226400	MCF-7_NDR_233	6.98651	*
chr1	3236520	3236680	MCF-7_NDR_234	5.35973	*
chr1	3237280	3237420	MCF-7_NDR_235	4.6016	*
chr1	3249460	3249600	MCF-7_NDR_236	4.55187	*
chr1	3250420	3250580	MCF-7_NDR_237	5.02133	*
chr1	3253860	3254060	MCF-7_NDR_238	13.4939	*
chr1	3254140	3254300	MCF-7_NDR_239	5.82471	*
chr1	3276000	3276200	MCF-7_NDR_240	11.4322	*
chr1	3276280	3276580	MCF-7_NDR_241	10.7073	*
chr1	3282120	3282280	MCF-7_NDR_242	4.79135	*
chr1	3283140	3283320	MCF-7_NDR_243	5.29992	*
chr1	3283740	3283880	MCF-7_NDR_244	3.89402	*
chr1	3291940	3292100	MCF-7_NDR_245	4.32961	*
chr1	3326820	3327020	MCF-7_NDR_246	8.17211	*
chr1	3327840	3327980	MCF-7_NDR_247	4.46107	*
chr1	3334620	3334760	MCF-7_NDR_248	7.14351	*
chr1	3335820	3335980	MCF-7_NDR_249	5.87158	*
chr1	3355520	3355660	MCF-7_NDR_250	5.24566	*
chr1	3368980	3369160	MCF-7_NDR_251	6.94517	*
chr1	3376700	3376940	MCF-7_NDR_252	8.77293	*
chr1	3384960	3385120	MCF-7_NDR_253	4.17676	*
chr1	3388180	3388340	MCF-7_NDR_254	5.23574	*
chr1	3398620	3398760	MCF-7_NDR_255	4.7828	*
chr1	3398800	3399160	MCF-7_NDR_256	10.608	*
chr1	3407820	3408000	MCF-7_NDR_257	7.34085	*
chr1	3409480	3409700	MCF-7_NDR_258	11.2266	*
chr1	3411360	3411560	MCF-7_NDR_259	7.67066	*
chr1	3415720	3415900	MCF-7_NDR_260	7.3893	*
chr1	3415940	3416080	MCF-7_NDR_261	3.54249	*
chr1	3417120	3417260	MCF-7_NDR_262	5.56892	*
chr1	3419580	3419720	MCF-7_NDR_263	4.24781	*
chr1	3440500	3440660	MCF-7_NDR_264	5.81527	*
chr1	3448100	3448280	MCF-7_NDR_265	6.40625	*
chr1	3468680	3468820	MCF-7_NDR_266	4.54409	*
chr1	3471720	3471880	MCF-7_NDR_267	6.40597	*
chr1	3478180	3478400	MCF-7_NDR_268	10.2683	*
chr1	3503740	3503900	MCF-7_NDR_269	6.70946	*
chr1	3504020	3504220	MCF-7_NDR_270	15.5111	*
chr1	3516700	3516840	MCF-7_NDR_271	4.64364	*
chr1	3518600	3518780	MCF-7_NDR_272	6.13869	*
chr1	3527880	3528020	MCF-7_NDR_273	4.06591	*
chr1	3530000	3530200	MCF-7_NDR_274	8.48529	*
chr1	3539200	3539360	MCF-7_NDR_275	5.69631	*
chr1	3548020	3548180	MCF-7_NDR_276	7.99741	*
chr1	3566500	3566860	MCF-7_NDR_277	14.3164	*
chr1	3569040	3569200	MCF-7_NDR_278	5.79185	*
chr1	3571300	3571540	MCF-7_NDR_279	7.91213	*
chr1	3578920	3579100	MCF-7_NDR_280	6.46935	*
chr1	3585340	3585680	MCF-7_NDR_281	9.0165	*
chr1	3591840	3591980	MCF-7_NDR_282	4.4928	*
chr1	3602040	3602200	MCF-7_NDR_283	4.48698	*
chr1	3614880	3615060	MCF-7_NDR_284	3.81492	*
chr1	3618700	3618840	MCF-7_NDR_285	4.32952	*
chr1	3624720	3624880	MCF-7_NDR_286	4.00031	*
chr1	3641100	3641260	MCF-7_NDR_287	4.46979	*
chr1	3651980	3652140	MCF-7_NDR_288	5.28403	*
chr1	3661700	3661860	MCF-7_NDR_289	4.38038	*
chr1	3668440	3668580	MCF-7_NDR_290	5.10052	*
chr1	3670580	3670740	MCF-7_NDR_291	5.39026	*
chr1	3676440	3676600	MCF-7_NDR_292	4.85361	*
chr1	3702020	3702180	MCF-7_NDR_293	4.58555	*
chr1	3710220	3710380	MCF-7_NDR_294	6.37449	*
chr1	3712980	3713160	MCF-7_NDR_295	7.40504	*
chr1	3718200	3718360	MCF-7_NDR_296	6.02906	*
chr1	3737280	3737440	MCF-7_NDR_297	3.75486	*
chr1	3773820	3774020	MCF-7_NDR_298	9.09836	*
chr1	3774860	3775040	MCF-7_NDR_299	6.0315	*
chr1	3786360	3786740	MCF-7_NDR_300	9.68714	*
chr1	3797640	3797800	MCF-7_NDR_301	5.23121	*
chr1	3816660	3816920	MCF-7_NDR_302	7.93137	*
chr1	3816980	3817340	MCF-7_NDR_303	10.0089	*
chr1	3827520	3827680	MCF-7_NDR_304	7.49922	*
chr1	4000560	4000700	MCF-7_NDR_305	6.97187	*
chr1	4001180	4001340	MCF-7_NDR_306	4.82822	*
chr1	4003080	4003220	MCF-7_NDR_307	5.96928	*
chr1	4003340	4003520	MCF-7_NDR_308	6.26858	*
chr1	4012820	4012980	MCF-7_NDR_309	6.56797	*
chr1	4015360	4015500	MCF-7_NDR_310	5.71059	*
chr1	4060980	4061120	MCF-7_NDR_311	5.8415	*
chr1	4093480	4093620	MCF-7_NDR_312	5.75558	*
chr1	4104580	4104740	MCF-7_NDR_313	4.69375	*
chr1	4108140	4108300	MCF-7_NDR_314	5.86952	*
chr1	4111440	4111580	MCF-7_NDR_315	4.99429	*
chr1	4123100	4123260	MCF-7_NDR_316	5.73494	*
chr1	4132600	4132740	MCF-7_NDR_317	5.40852	*
chr1	4151620	4151780	MCF-7_NDR_318	5.29141	*
chr1	4161140	4161300	MCF-7_NDR_319	4.27821	*
chr1	4187360	4187520	MCF-7_NDR_320	6.24142	*
chr1	4219920	4220060	MCF-7_NDR_321	6.02318	*
chr1	4223380	4223520	MCF-7_NDR_322	4.37412	*
chr1	4230140	4230320	MCF-7_NDR_323	5.24453	*
chr1	4265900	4266080	MCF-7_NDR_324	4.23095	*
chr1	4270180	4270360	MCF-7_NDR_325	3.76081	*
chr1	4273080	4273220	MCF-7_NDR_326	4.48149	*
chr1	4274480	4274660	MCF-7_NDR_327	4.96493	*
chr1	4294800	4294960	MCF-7_NDR_328	3.59197	*
chr1	4331840	4332000	MCF-7_NDR_329	4.71631	*
chr1	4378880	4379020	MCF-7_NDR_330	5.07255	*
chr1	4382940	4383120	MCF-7_NDR_331	5.36542	*
chr1	4386360	4386520	MCF-7_NDR_332	4.16705	*
chr1	4556020	4556180	MCF-7_NDR_333	4.04722	*
chr1	4570080	4570420	MCF-7_NDR_334	7.34256	*
chr1	4621220	4621400	MCF-7_NDR_335	6.31628	*
chr1	4650880	4651040	MCF-7_NDR_336	4.94075	*
chr1	4653320	4653480	MCF-7_NDR_337	5.10093	*
chr1	4683520	4683700	MCF-7_NDR_338	4.64723	*
chr1	4687460	4687600	MCF-7_NDR_339	4.8843	*
chr1	4705120	4705260	MCF-7_NDR_340	3.43082	*
chr1	4792600	4792780	MCF-7_NDR_341	5.95613	*
chr1	4836900	4837060	MCF-7_NDR_342	6.89143	*
chr1	4838080	4838280	MCF-7_NDR_343	7.87146	*
chr1	4844360	4844500	MCF-7_NDR_344	4.19824	*
chr1	4886220	4886380	MCF-7_NDR_345	4.44372	*
chr1	4933180	4933340	MCF-7_NDR_346	4.26248	*
chr1	4988560	4988720	MCF-7_NDR_347	4.26373	*
chr1	5023420	5023620	MCF-7_NDR_348	6.63765	*
chr1	5080060	5080200	MCF-7_NDR_349	4.60961	*
chr1	5159720	5159960	MCF-7_NDR_350	7.98932	*
chr1	5202960	5203100	MCF-7_NDR_351	3.89964	*
chr1	5280720	5280860	MCF-7_NDR_352	3.94465	*
chr1	5286440	5286580	MCF-7_NDR_353	5.05701	*
chr1	5333640	5333780	MCF-7_NDR_354	4.36235	*
chr1	5335360	5335520	MCF-7_NDR_355	7.66466	*
chr1	5347060	5347220	MCF-7_NDR_356	4.74212	*
chr1	5495340	5495500	MCF-7_NDR_357	4.48331	*
chr1	5504520	5504740	MCF-7_NDR_358	9.30118	*
chr1	5515880	5516060	MCF-7_NDR_359	6.65811	*
chr1	5542180	5542320	MCF-7_NDR_360	4.97157	*
chr1	5557600	5557740	MCF-7_NDR_361	5.49736	*
chr1	5574740	5574940	MCF-7_NDR_362	14.0863	*
chr1	5657360	5657500	MCF-7_NDR_363	6.69154	*
chr1	5678200	5678360	MCF-7_NDR_364	4.27056	*
chr1	5681140	5681280	MCF-7_NDR_365	5.65679	*
chr1	5697280	5697540	MCF-7_NDR_366	7.03359	*
chr1	5708400	5708580	MCF-7_NDR_367	7.43522	*
chr1	5708680	5708840	MCF-7_NDR_368	5.11295	*
chr1	5720180	5720340	MCF-7_NDR_369	4.38499	*
chr1	5721800	5721940	MCF-7_NDR_370	5.28098	*
chr1	5743000	5743140	MCF-7_NDR_371	4.05234	*
chr1	5765480	5765620	MCF-7_NDR_372	4.02881	*
chr1	5768640	5768780	MCF-7_NDR_373	4.66551	*
chr1	5826840	5826980	MCF-7_NDR_374	4.02007	*
chr1	5828160	5828380	MCF-7_NDR_375	8.37525	*
chr1	5836520	5836680	MCF-7_NDR_376	6.02155	*
chr1	5846820	5847000	MCF-7_NDR_377	7.07009	*
chr1	5894800	5894980	MCF-7_NDR_378	4.82232	*
chr1	5895440	5895580	MCF-7_NDR_379	4.6419	*
chr1	5910500	5910660	MCF-7_NDR_380	5.03562	*
chr1	5913660	5913800	MCF-7_NDR_381	5.86073	*
chr1	5945480	5945660	MCF-7_NDR_382	7.56132	*
chr1	5960000	5960160	MCF-7_NDR_383	4.68623	*
chr1	6052420	6052560	MCF-7_NDR_384	5.61376	*
chr1	6062420	6062600	MCF-7_NDR_385	6.36969	*
chr1	6099160	6099300	MCF-7_NDR_386	4.38729	*
chr1	6101680	6101820	MCF-7_NDR_387	4.53555	*
chr1	6113060	6113200	MCF-7_NDR_388	5.05859	*
chr1	6117780	6117940	MCF-7_NDR_389	5.10575	*
chr1	6120100	6120280	MCF-7_NDR_390	9.52294	*
chr1	6125140	6125320	MCF-7_NDR_391	6.92395	*
chr1	6138720	6138860	MCF-7_NDR_392	5.80359	*
chr1	6140700	6140900	MCF-7_NDR_393	8.57315	*
chr1	6142420	6142720	MCF-7_NDR_394	7.19862	*
chr1	6165280	6165440	MCF-7_NDR_395	4.10734	*
chr1	6168940	6169200	MCF-7_NDR_396	8.10166	*
chr1	6186360	6186500	MCF-7_NDR_397	3.90633	*
chr1	6205200	6205360	MCF-7_NDR_398	4.10855	*
chr1	6217400	6217540	MCF-7_NDR_399	4.30557	*
chr1	6217960	6218200	MCF-7_NDR_400	7.90029	*
chr1	6231660	6231820	MCF-7_NDR_401	4.08801	*
chr1	6240280	6240420	MCF-7_NDR_402	6.04451	*
chr1	6259480	6259800	MCF-7_NDR_403	10.7164	*
chr1	6264980	6265180	MCF-7_NDR_404	7.50465	*
chr1	6265240	6265420	MCF-7_NDR_405	8.9259	*
chr1	6265860	6266260	MCF-7_NDR_406	12.8124	*
chr1	6266360	6266500	MCF-7_NDR_407	6.41737	*
chr1	6280320	6280500	MCF-7_NDR_408	8.6898	*
chr1	6280520	6280700	MCF-7_NDR_409	8.62741	*
chr1	6296120	6296300	MCF-7_NDR_410	6.29095	*
chr1	6305300	6305460	MCF-7_NDR_411	5.27537	*
chr1	6307260	6307440	MCF-7_NDR_412	5.25967	*
chr1	6320080	6320220	MCF-7_NDR_413	5.62707	*
chr1	6329840	6330000	MCF-7_NDR_414	6.18071	*
chr1	6340000	6340260	MCF-7_NDR_415	5.2904	*
chr1	6370100	6370260	MCF-7_NDR_416	4.09553	*
chr1	6377560	6377740	MCF-7_NDR_417	6.09466	*
chr1	6385600	6385760	MCF-7_NDR_418	5.69153	*
chr1	6399140	6399280	MCF-7_NDR_419	5.0812	*
chr1	6403640	6404000	MCF-7_NDR_420	15.2306	*
chr1	6414100	6414340	MCF-7_NDR_421	8.93575	*
chr1	6423300	6423460	MCF-7_NDR_422	6.32699	*
chr1	6445620	6445880	MCF-7_NDR_423	13.3113	*
chr1	6452380	6452560	MCF-7_NDR_424	6.90336	*
chr1	6453300	6453680	MCF-7_NDR_425	11.5566	*
chr1	6454060	6454280	MCF-7_NDR_426	10.9056	*
chr1	6457200	6457380	MCF-7_NDR_427	5.66447	*
chr1	6464760	6464940	MCF-7_NDR_428	7.80282	*
chr1	6475080	6475260	MCF-7_NDR_429	6.85379	*
chr1	6475440	6475580	MCF-7_NDR_430	3.75164	*
chr1	6479920	6480060	MCF-7_NDR_431	5.73786	*
chr1	6481440	6481580	MCF-7_NDR_432	6.2152	*
chr1	6483540	6483820	MCF-7_NDR_433	9.73046	*
chr1	6484900	6485040	MCF-7_NDR_434	7.08395	*
chr1	6485200	6485380	MCF-7_NDR_435	6.70766	*
chr1	6497120	6497380	MCF-7_NDR_436	5.96662	*
chr1	6503660	6503840	MCF-7_NDR_437	5.79492	*
chr1	6506400	6506560	MCF-7_NDR_438	6.97696	*
chr1	6524640	6524840	MCF-7_NDR_439	7.03559	*
chr1	6529920	6530080	MCF-7_NDR_440	5.42503	*
chr1	6531580	6531740	MCF-7_NDR_441	5.16038	*
chr1	6558680	6558820	MCF-7_NDR_442	6.42965	*
chr1	6565140	6565280	MCF-7_NDR_443	4.19836	*
chr1	6568700	6568840	MCF-7_NDR_444	4.22163	*
chr1	6580140	6580340	MCF-7_NDR_445	7.05084	*
chr1	6583740	6583900	MCF-7_NDR_446	6.25264	*
chr1	6630080	6630220	MCF-7_NDR_447	4.57624	*
chr1	6635120	6635260	MCF-7_NDR_448	6.04449	*
chr1	6638740	6638880	MCF-7_NDR_449	4.16589	*
chr1	6639920	6640080	MCF-7_NDR_450	7.24752	*
chr1	6669880	6670060	MCF-7_NDR_451	5.71631	*
chr1	6685400	6685660	MCF-7_NDR_452	6.53258	*
chr1	6688820	6689000	MCF-7_NDR_453	4.866	*
chr1	6689100	6689240	MCF-7_NDR_454	4.32455	*
chr1	6706600	6706880	MCF-7_NDR_455	6.03729	*
chr1	6724800	6724940	MCF-7_NDR_456	4.24521	*
chr1	6766840	6766980	MCF-7_NDR_457	4.42062	*
chr1	6776180	6776320	MCF-7_NDR_458	5.38094	*
chr1	6830840	6831000	MCF-7_NDR_459	6.52165	*
chr1	6831300	6831440	MCF-7_NDR_460	4.21398	*
chr1	6836660	6836800	MCF-7_NDR_461	3.64578	*
chr1	6845100	6845260	MCF-7_NDR_462	6.5469	*
chr1	6854260	6854480	MCF-7_NDR_463	6.50857	*
chr1	6860940	6861100	MCF-7_NDR_464	4.76203	*
chr1	6920180	6920380	MCF-7_NDR_465	8.64074	*
chr1	6928240	6928400	MCF-7_NDR_466	4.62527	*
chr1	7012020	7012160	MCF-7_NDR_467	5.27523	*
chr1	7019380	7019540	MCF-7_NDR_468	5.58124	*
chr1	7019640	7019820	MCF-7_NDR_469	7.18781	*
chr1	7020740	7020920	MCF-7_NDR_470	6.63197	*
chr1	7022980	7023140	MCF-7_NDR_471	5.04321	*
chr1	7027600	7027740	MCF-7_NDR_472	5.97008	*
chr1	7031760	7031940	MCF-7_NDR_473	7.84605	*
chr1	7058340	7058680	MCF-7_NDR_474	13.5848	*
chr1	7108020	7108220	MCF-7_NDR_475	10.0554	*
chr1	7128740	7128880	MCF-7_NDR_476	4.50217	*
chr1	7135460	7135620	MCF-7_NDR_477	4.54188	*
chr1	7177400	7177560	MCF-7_NDR_478	4.75526	*
chr1	7177620	7177900	MCF-7_NDR_479	14.6508	*
chr1	7180960	7181140	MCF-7_NDR_480	7.49677	*
chr1	7258600	7258780	MCF-7_NDR_481	5.86057	*
chr1	7268120	7268300	MCF-7_NDR_482	9.77718	*
chr1	7283700	7283900	MCF-7_NDR_483	7.82416	*
chr1	7284840	7285000	MCF-7_NDR_484	4.5684	*
chr1	7288800	7288940	MCF-7_NDR_485	5.64014	*
chr1	7293320	7293460	MCF-7_NDR_486	5.16785	*
chr1	7306700	7306840	MCF-7_NDR_487	4.98434	*
chr1	7322840	7322980	MCF-7_NDR_488	6.31728	*
chr1	7325860	7326060	MCF-7_NDR_489	7.55197	*
chr1	7386620	7386780	MCF-7_NDR_490	4.90948	*
chr1	7392280	7392440	MCF-7_NDR_491	3.6603	*
chr1	7395460	7395640	MCF-7_NDR_492	8.71143	*
chr1	7419680	7419820	MCF-7_NDR_493	4.75416	*
chr1	7447580	7447780	MCF-7_NDR_494	13.0549	*
chr1	7448240	7448460	MCF-7_NDR_495	9.27145	*
chr1	7461840	7462220	MCF-7_NDR_496	15.6274	*
chr1	7480220	7480360	MCF-7_NDR_497	4.62989	*
chr1	7487960	7488120	MCF-7_NDR_498	6.20198	*
chr1	7499040	7499200	MCF-7_NDR_499	6.02224	*
chr1	7500000	7500140	MCF-7_NDR_500	5.66471	*
chr1	7500380	7500540	MCF-7_NDR_501	4.65619	*
chr1	7500640	7500840	MCF-7_NDR_502	8.95141	*
chr1	7511280	7511460	MCF-7_NDR_503	7.31696	*
chr1	7516340	7516500	MCF-7_NDR_504	3.469	*
chr1	7516700	7516840	MCF-7_NDR_505	4.13019	*
chr1	7524960	7525140	MCF-7_NDR_506	5.29513	*
chr1	7530960	7531260	MCF-7_NDR_507	10.7759	*
chr1	7535020	7535200	MCF-7_NDR_508	6.27467	*
chr1	7535260	7535440	MCF-7_NDR_509	6.77589	*
chr1	7552400	7552540	MCF-7_NDR_510	4.78778	*
chr1	7553840	7554020	MCF-7_NDR_511	5.64291	*
chr1	7575520	7575680	MCF-7_NDR_512	4.01186	*
chr1	7579620	7579780	MCF-7_NDR_513	4.96844	*
chr1	7597480	7597640	MCF-7_NDR_514	4.57662	*
chr1	7599780	7599960	MCF-7_NDR_515	7.9137	*
chr1	7609360	7609520	MCF-7_NDR_516	4.74572	*
chr1	7621480	7621640	MCF-7_NDR_517	5.72275	*
chr1	7626340	7626480	MCF-7_NDR_518	4.05772	*
chr1	7649180	7649360	MCF-7_NDR_519	6.56963	*
chr1	7654540	7654700	MCF-7_NDR_520	6.84849	*
chr1	7655520	7655680	MCF-7_NDR_521	6.79812	*
chr1	7668700	7668840	MCF-7_NDR_522	4.44892	*
chr1	7676460	7676660	MCF-7_NDR_523	6.88957	*
chr1	7680280	7680440	MCF-7_NDR_524	4.62881	*
chr1	7688320	7688480	MCF-7_NDR_525	4.63143	*
chr1	7694000	7694160	MCF-7_NDR_526	5.0916	*
chr1	7697700	7697840	MCF-7_NDR_527	4.06447	*
chr1	7705600	7705920	MCF-7_NDR_528	6.24431	*
chr1	7707400	7707600	MCF-7_NDR_529	8.60301	*
chr1	7722580	7722740	MCF-7_NDR_530	5.11607	*
chr1	7723540	7723680	MCF-7_NDR_531	4.82118	*
chr1	7726460	7726640	MCF-7_NDR_532	6.74013	*
chr1	7727640	7727920	MCF-7_NDR_533	9.22445	*
chr1	7740860	7741060	MCF-7_NDR_534	9.71566	*
chr1	7745360	7745520	MCF-7_NDR_535	6.69042	*
chr1	7758340	7758520	MCF-7_NDR_536	5.47869	*
chr1	7777780	7777960	MCF-7_NDR_537	6.84664	*
chr1	7788300	7788460	MCF-7_NDR_538	4.68492	*
chr1	7815640	7815780	MCF-7_NDR_539	5.08799	*
chr1	7842140	7842300	MCF-7_NDR_540	4.55399	*
chr1	7919740	7919880	MCF-7_NDR_541	5.09209	*
chr1	7939480	7939620	MCF-7_NDR_542	4.49793	*
chr1	7962680	7962840	MCF-7_NDR_543	5.31421	*
chr1	8002440	8002620	MCF-7_NDR_544	5.10545	*
chr1	8035340	8035640	MCF-7_NDR_545	8.21411	*
chr1	8042400	8042560	MCF-7_NDR_546	5.27761	*
chr1	8066460	8066660	MCF-7_NDR_547	8.94041	*
chr1	8075100	8075240	MCF-7_NDR_548	5.72809	*
chr1	8080060	8080380	MCF-7_NDR_549	19.514	*
chr1	8085120	8085300	MCF-7_NDR_550	7.27658	*
chr1	8088420	8088560	MCF-7_NDR_551	5.71349	*
chr1	8100700	8100960	MCF-7_NDR_552	12.3602	*
chr1	8121340	8121660	MCF-7_NDR_553	21.8005	*
chr1	8121720	8121860	MCF-7_NDR_554	3.99294	*
chr1	8130420	8130700	MCF-7_NDR_555	15.2347	*
chr1	8136280	8136440	MCF-7_NDR_556	3.54385	*
chr1	8137300	8137620	MCF-7_NDR_557	15.8592	*
chr1	8138380	8138560	MCF-7_NDR_558	7.15263	*
chr1	8154760	8154900	MCF-7_NDR_559	6.2093	*
chr1	8156740	8157000	MCF-7_NDR_560	6.03538	*
chr1	8157500	8157820	MCF-7_NDR_561	15.2871	*
chr1	8174640	8174780	MCF-7_NDR_562	4.93947	*
chr1	8177140	8177280	MCF-7_NDR_563	6.19482	*
chr1	8181180	8181360	MCF-7_NDR_564	5.12557	*
chr1	8214440	8214620	MCF-7_NDR_565	5.90167	*
chr1	8214860	8215060	MCF-7_NDR_566	6.0689	*
chr1	8229840	8230060	MCF-7_NDR_567	10.5013	*
chr1	8242180	8242360	MCF-7_NDR_568	5.71822	*
chr1	8242380	8242840	MCF-7_NDR_569	27.6634	*
chr1	8254520	8254960	MCF-7_NDR_570	9.59761	*
chr1	8257840	8258000	MCF-7_NDR_571	5.67573	*
chr1	8262320	8262480	MCF-7_NDR_572	4.74696	*
chr1	8262560	8262740	MCF-7_NDR_573	6.57036	*
chr1	8272000	8272160	MCF-7_NDR_574	6.10827	*
chr1	8277020	8277160	MCF-7_NDR_575	3.68922	*
chr1	8298160	8298300	MCF-7_NDR_576	4.81102	*
chr1	8299140	8299320	MCF-7_NDR_577	7.30394	*
chr1	8319020	8319360	MCF-7_NDR_578	10.3876	*
chr1	8319520	8319680	MCF-7_NDR_579	5.67768	*
chr1	8319780	8320020	MCF-7_NDR_580	9.23893	*
chr1	8355500	8355640	MCF-7_NDR_581	5.03974	*
chr1	8374400	8374680	MCF-7_NDR_582	12.1237	*
chr1	8409120	8409280	MCF-7_NDR_583	5.4724	*
chr1	8435020	8435200	MCF-7_NDR_584	7.84873	*
chr1	8460940	8461100	MCF-7_NDR_585	6.53304	*
chr1	8469360	8469580	MCF-7_NDR_586	7.30129	*
chr1	8472400	8472580	MCF-7_NDR_587	4.85838	*
chr1	8484220	8484360	MCF-7_NDR_588	5.489	*
chr1	8503660	8503860	MCF-7_NDR_589	8.30512	*
chr1	8543260	8543460	MCF-7_NDR_590	7.47348	*
chr1	8550280	8550420	MCF-7_NDR_591	7.41806	*
chr1	8556100	8556240	MCF-7_NDR_592	4.49001	*
chr1	8586040	8586320	MCF-7_NDR_593	16.3414	*
chr1	8634040	8634180	MCF-7_NDR_594	4.88947	*
chr1	8635400	8635600	MCF-7_NDR_595	7.29603	*
chr1	8650800	8650960	MCF-7_NDR_596	4.7535	*
chr1	8664460	8664600	MCF-7_NDR_597	3.40893	*
chr1	8686420	8686560	MCF-7_NDR_598	3.91905	*
chr1	8726420	8726580	MCF-7_NDR_599	6.26981	*
chr1	8728360	8728520	MCF-7_NDR_600	4.35744	*
chr1	8731440	8731620	MCF-7_NDR_601	7.28946	*
chr1	8741420	8741580	MCF-7_NDR_602	5.93349	*
chr1	8761640	8761860	MCF-7_NDR_603	21.4805	*
chr1	8762240	8762520	MCF-7_NDR_604	17.5961	*
chr1	8763300	8763460	MCF-7_NDR_605	6.45174	*
chr1	8765260	8765520	MCF-7_NDR_606	7.91668	*
chr1	8772040	8772180	MCF-7_NDR_607	4.40004	*
chr1	8772540	8772700	MCF-7_NDR_608	7.06257	*
chr1	8772860	8773100	MCF-7_NDR_609	15.9029	*
chr1	8781100	8781240	MCF-7_NDR_610	3.44919	*
chr1	8786640	8786880	MCF-7_NDR_611	9.33886	*
chr1	8786920	8787080	MCF-7_NDR_612	4.38533	*
chr1	8793560	8793740	MCF-7_NDR_613	7.51498	*
chr1	8799480	8799620	MCF-7_NDR_614	4.76193	*
chr1	8849720	8849960	MCF-7_NDR_615	11.2648	*
chr1	8854760	8854920	MCF-7_NDR_616	5.98807	*
chr1	8877620	8877820	MCF-7_NDR_617	8.97973	*
chr1	8908080	8908400	MCF-7_NDR_618	9.69124	*
chr1	8908960	8909180	MCF-7_NDR_619	13.6024	*
chr1	8914420	8914560	MCF-7_NDR_620	4.46082	*
chr1	8933660	8934020	MCF-7_NDR_621	10.4288	*
chr1	8937900	8938260	MCF-7_NDR_622	14.7526	*
chr1	8940160	8940400	MCF-7_NDR_623	7.57106	*
chr1	8950620	8950840	MCF-7_NDR_624	10.601	*
chr1	8963980	8964280	MCF-7_NDR_625	10.4602	*
chr1	8970480	8970640	MCF-7_NDR_626	4.56415	*
chr1	8971140	8971360	MCF-7_NDR_627	11.2622	*
chr1	8975600	8975740	MCF-7_NDR_628	4.54396	*
chr1	8978180	8978460	MCF-7_NDR_629	10.1765	*
chr1	9001980	9002160	MCF-7_NDR_630	5.79926	*
chr1	9023060	9023280	MCF-7_NDR_631	5.81592	*
chr1	9053500	9053680	MCF-7_NDR_632	4.70682	*
chr1	9065180	9065360	MCF-7_NDR_633	8.25973	*
chr1	9093140	9093300	MCF-7_NDR_634	4.49702	*
chr1	9140800	9140960	MCF-7_NDR_635	5.26921	*
chr1	9145500	9145660	MCF-7_NDR_636	5.30848	*
chr1	9158540	9158680	MCF-7_NDR_637	3.8803	*
chr1	9161660	9161840	MCF-7_NDR_638	8.06922	*
chr1	9170860	9171140	MCF-7_NDR_639	10.8993	*
chr1	9173080	9173340	MCF-7_NDR_640	8.03188	*
chr1	9183900	9184040	MCF-7_NDR_641	5.22603	*
chr1	9184580	9184860	MCF-7_NDR_642	14.1369	*
chr1	9186700	9186860	MCF-7_NDR_643	5.80767	*
chr1	9187500	9187640	MCF-7_NDR_644	4.80205	*
chr1	9189580	9189800	MCF-7_NDR_645	8.62994	*
chr1	9222040	9222200	MCF-7_NDR_646	5.84637	*
chr1	9223720	9223900	MCF-7_NDR_647	7.46114	*
chr1	9224080	9224280	MCF-7_NDR_648	5.69027	*
chr1	9225480	9225680	MCF-7_NDR_649	7.66814	*
chr1	9229760	9229920	MCF-7_NDR_650	5.09264	*
chr1	9248600	9248780	MCF-7_NDR_651	6.47423	*
chr1	9254120	9254440	MCF-7_NDR_652	14.4572	*
chr1	9256560	9256740	MCF-7_NDR_653	8.95693	*
chr1	9261840	9261980	MCF-7_NDR_654	4.92417	*
chr1	9262080	9262240	MCF-7_NDR_655	4.41265	*
chr1	9262340	9262480	MCF-7_NDR_656	4.11492	*
chr1	9263020	9263160	MCF-7_NDR_657	4.80969	*
chr1	9309020	9309160	MCF-7_NDR_658	4.74785	*
chr1	9310140	9310300	MCF-7_NDR_659	6.87725	*
chr1	9327180	9327320	MCF-7_NDR_660	6.08782	*
chr1	9350320	9350500	MCF-7_NDR_661	5.90418	*
chr1	9352900	9353060	MCF-7_NDR_662	7.71145	*
chr1	9360200	9360620	MCF-7_NDR_663	13.2101	*
chr1	9363220	9363480	MCF-7_NDR_664	10.494	*
chr1	9368200	9368380	MCF-7_NDR_665	5.14785	*
chr1	9372340	9372500	MCF-7_NDR_666	5.79417	*
chr1	9372520	9372660	MCF-7_NDR_667	4.49113	*
chr1	9374100	9374260	MCF-7_NDR_668	5.83022	*
chr1	9385000	9385220	MCF-7_NDR_669	6.58794	*
chr1	9398360	9398500	MCF-7_NDR_670	5.64972	*
chr1	9399000	9399180	MCF-7_NDR_671	6.33059	*
chr1	9404620	9404760	MCF-7_NDR_672	4.99503	*
chr1	9405640	9405820	MCF-7_NDR_673	7.28285	*
chr1	9448980	9449120	MCF-7_NDR_674	5.03099	*
chr1	9461960	9462220	MCF-7_NDR_675	6.85355	*
chr1	9473680	9473820	MCF-7_NDR_676	4.23368	*
chr1	9479000	9479160	MCF-7_NDR_677	5.52189	*
chr1	9488800	9489220	MCF-7_NDR_678	12.1852	*
chr1	9510480	9510660	MCF-7_NDR_679	5.27556	*
chr1	9533160	9533600	MCF-7_NDR_680	11.0155	*
chr1	9536960	9537300	MCF-7_NDR_681	11.4847	*
chr1	9543740	9543900	MCF-7_NDR_682	6.48346	*
chr1	9547360	9547500	MCF-7_NDR_683	5.53653	*
chr1	9565420	9565560	MCF-7_NDR_684	5.02438	*
chr1	9599240	9599400	MCF-7_NDR_685	5.46416	*
chr1	9604820	9604960	MCF-7_NDR_686	3.87435	*
chr1	9606780	9606940	MCF-7_NDR_687	4.41738	*
chr1	9633120	9633260	MCF-7_NDR_688	4.79065	*
chr1	9648540	9649020	MCF-7_NDR_689	8.40753	*
chr1	9652420	9652580	MCF-7_NDR_690	4.2697	*
chr1	9675700	9675880	MCF-7_NDR_691	5.85392	*
chr1	9687240	9687380	MCF-7_NDR_692	6.66278	*
chr1	9711700	9711880	MCF-7_NDR_693	6.30605	*
chr1	9713740	9713900	MCF-7_NDR_694	6.08861	*
chr1	9754660	9754800	MCF-7_NDR_695	3.90211	*
chr1	9759560	9759800	MCF-7_NDR_696	6.58564	*
chr1	9774320	9774520	MCF-7_NDR_697	7.53548	*
chr1	9779140	9779520	MCF-7_NDR_698	10.4459	*
chr1	9825900	9826080	MCF-7_NDR_699	7.01684	*
chr1	9842500	9842680	MCF-7_NDR_700	7.43456	*
chr1	9844760	9844940	MCF-7_NDR_701	6.65532	*
chr1	9849100	9849260	MCF-7_NDR_702	4.18597	*
chr1	9885540	9886040	MCF-7_NDR_703	13.5842	*
chr1	9888720	9888860	MCF-7_NDR_704	3.93068	*
chr1	9902860	9903000	MCF-7_NDR_705	5.08149	*
chr1	9906740	9906920	MCF-7_NDR_706	6.00378	*
chr1	9921620	9921760	MCF-7_NDR_707	6.02244	*
chr1	9924220	9924360	MCF-7_NDR_708	4.28149	*
chr1	9924920	9925080	MCF-7_NDR_709	4.24464	*
chr1	9933220	9933360	MCF-7_NDR_710	5.15468	*
chr1	9935000	9935200	MCF-7_NDR_711	5.42453	*
chr1	9938200	9938360	MCF-7_NDR_712	6.97003	*
chr1	9960440	9960600	MCF-7_NDR_713	4.76508	*
chr1	9971100	9971280	MCF-7_NDR_714	5.47998	*
chr1	9974520	9974720	MCF-7_NDR_715	8.84861	*
chr1	10010580	10010780	MCF-7_NDR_716	8.11162	*
chr1	10021280	10021520	MCF-7_NDR_717	7.09425	*
chr1	10047100	10047240	MCF-7_NDR_718	5.61161	*
chr1	10092580	10092720	MCF-7_NDR_719	4.91048	*
chr1	10092760	10092920	MCF-7_NDR_720	5.49248	*
chr1	10095020	10095200	MCF-7_NDR_721	6.36211	*
chr1	10099660	10099840	MCF-7_NDR_722	5.84895	*
chr1	10116480	10116620	MCF-7_NDR_723	5.76601	*
chr1	10143620	10143820	MCF-7_NDR_724	9.79725	*
chr1	10182940	10183080	MCF-7_NDR_725	4.06392	*
chr1	10206560	10206720	MCF-7_NDR_726	5.75886	*
chr1	10264680	10264820	MCF-7_NDR_727	5.31123	*
chr1	10264880	10265040	MCF-7_NDR_728	5.12149	*
chr1	10271500	10271700	MCF-7_NDR_729	10.8773	*
chr1	10285220	10285380	MCF-7_NDR_730	4.63271	*
chr1	10302240	10302520	MCF-7_NDR_731	9.80618	*
chr1	10332260	10332400	MCF-7_NDR_732	3.47644	*
chr1	10394180	10394340	MCF-7_NDR_733	5.18403	*
chr1	10398280	10398440	MCF-7_NDR_734	5.41472	*
chr1	10437500	10437800	MCF-7_NDR_735	5.16863	*
chr1	10440760	10441020	MCF-7_NDR_736	11.1938	*
chr1	10447640	10447840	MCF-7_NDR_737	13.4958	*
chr1	10447960	10448100	MCF-7_NDR_738	5.30825	*
chr1	10458800	10458940	MCF-7_NDR_739	5.35908	*
chr1	10462860	10463040	MCF-7_NDR_740	5.63039	*
chr1	10488120	10488320	MCF-7_NDR_741	11.4346	*
chr1	10510180	10510320	MCF-7_NDR_742	5.08932	*
chr1	10519220	10519500	MCF-7_NDR_743	7.83761	*
chr1	10532580	10532820	MCF-7_NDR_744	8.3259	*
chr1	10534560	10534760	MCF-7_NDR_745	8.44491	*
chr1	10555160	10555440	MCF-7_NDR_746	11.8034	*
chr1	10567660	10567840	MCF-7_NDR_747	9.28511	*
chr1	10571020	10571520	MCF-7_NDR_748	18.2274	*
chr1	10576720	10576880	MCF-7_NDR_749	6.07045	*
chr1	10577540	10577680	MCF-7_NDR_750	4.92883	*
chr1	10615700	10615920	MCF-7_NDR_751	12.5358	*
chr1	10645720	10645920	MCF-7_NDR_752	9.25281	*
chr1	10646300	10646500	MCF-7_NDR_753	7.30976	*
chr1	10658480	10658660	MCF-7_NDR_754	4.83648	*
chr1	10661400	10661540	MCF-7_NDR_755	4.89589	*
chr1	10688780	10688920	MCF-7_NDR_756	4.45005	*
chr1	10705560	10705700	MCF-7_NDR_757	4.49602	*
chr1	10706480	10706700	MCF-7_NDR_758	11.7277	*
chr1	10707620	10707780	MCF-7_NDR_759	5.31198	*
chr1	10711960	10712120	MCF-7_NDR_760	5.31741	*
chr1	10735240	10735420	MCF-7_NDR_761	5.75063	*
chr1	10749200	10749380	MCF-7_NDR_762	5.50449	*
chr1	10752480	10752660	MCF-7_NDR_763	7.43018	*
chr1	10754500	10754680	MCF-7_NDR_764	7.60738	*
chr1	10754920	10755100	MCF-7_NDR_765	7.1801	*
chr1	10759520	10759740	MCF-7_NDR_766	7.58356	*
chr1	10764760	10764900	MCF-7_NDR_767	5.53781	*
chr1	10771600	10771760	MCF-7_NDR_768	4.25333	*
chr1	10791020	10791500	MCF-7_NDR_769	11.0887	*
chr1	10815860	10816200	MCF-7_NDR_770	8.38396	*
chr1	10821960	10822140	MCF-7_NDR_771	5.75684	*
chr1	10822980	10823120	MCF-7_NDR_772	6.26901	*
chr1	10828060	10828200	MCF-7_NDR_773	4.50264	*
chr1	10836220	10836380	MCF-7_NDR_774	3.84947	*
chr1	10836660	10836860	MCF-7_NDR_775	7.84141	*
chr1	10839300	10839620	MCF-7_NDR_776	19.6418	*
chr1	10841320	10841480	MCF-7_NDR_777	5.48361	*
chr1	10855640	10855820	MCF-7_NDR_778	4.94828	*
chr1	10864500	10864660	MCF-7_NDR_779	5.36339	*
chr1	10873040	10873180	MCF-7_NDR_780	4.54534	*
chr1	10891220	10891400	MCF-7_NDR_781	5.51875	*
chr1	10896200	10896360	MCF-7_NDR_782	5.86917	*
chr1	10897360	10897700	MCF-7_NDR_783	9.19532	*
chr1	10950560	10950760	MCF-7_NDR_784	6.49263	*
chr1	10950960	10951160	MCF-7_NDR_785	10.8415	*
chr1	10958400	10958540	MCF-7_NDR_786	4.97941	*
chr1	10960320	10960480	MCF-7_NDR_787	4.54403	*
chr1	10960660	10961000	MCF-7_NDR_788	7.51297	*
chr1	10961140	10961320	MCF-7_NDR_789	6.54368	*
chr1	10961820	10962000	MCF-7_NDR_790	7.36131	*
chr1	10965960	10966120	MCF-7_NDR_791	4.72778	*
chr1	10992080	10992240	MCF-7_NDR_792	5.11704	*
chr1	11007220	11007380	MCF-7_NDR_793	6.18961	*
chr1	11017060	11017240	MCF-7_NDR_794	5.19891	*
chr1	11018820	11018980	MCF-7_NDR_795	5.99889	*
chr1	11021120	11021380	MCF-7_NDR_796	7.0575	*
chr1	11028460	11028620	MCF-7_NDR_797	4.5755	*
chr1	11032800	11032940	MCF-7_NDR_798	5.08171	*
chr1	11032980	11033120	MCF-7_NDR_799	4.26426	*
chr1	11035920	11036100	MCF-7_NDR_800	9.20168	*
chr1	11069600	11069740	MCF-7_NDR_801	3.97534	*
chr1	11072620	11072780	MCF-7_NDR_802	3.85731	*
chr1	11073320	11073480	MCF-7_NDR_803	5.53756	*
chr1	11097680	11097860	MCF-7_NDR_804	9.66508	*
chr1	11113120	11113280	MCF-7_NDR_805	5.35749	*
chr1	11118720	11118880	MCF-7_NDR_806	4.9143	*
chr1	11139640	11139800	MCF-7_NDR_807	4.59912	*
chr1	11139880	11140060	MCF-7_NDR_808	5.02943	*
chr1	11159340	11159560	MCF-7_NDR_809	10.7841	*
chr1	11265140	11265280	MCF-7_NDR_810	4.47712	*
chr1	11308300	11308480	MCF-7_NDR_811	10.3257	*
chr1	11322840	11323020	MCF-7_NDR_812	5.16532	*
chr1	11332820	11333040	MCF-7_NDR_813	11.0363	*
chr1	11358860	11359040	MCF-7_NDR_814	5.71289	*
chr1	11375940	11376100	MCF-7_NDR_815	4.43862	*
chr1	11382080	11382260	MCF-7_NDR_816	6.95447	*
chr1	11397640	11397900	MCF-7_NDR_817	6.43678	*
chr1	11458620	11458920	MCF-7_NDR_818	5.29025	*
chr1	11500660	11500800	MCF-7_NDR_819	4.31228	*
chr1	11506420	11506560	MCF-7_NDR_820	6.99221	*
chr1	11528660	11528800	MCF-7_NDR_821	4.48578	*
chr1	11544420	11544560	MCF-7_NDR_822	5.0317	*
chr1	11547600	11547740	MCF-7_NDR_823	3.965	*
chr1	11581760	11581920	MCF-7_NDR_824	6.40943	*
chr1	11583700	11583860	MCF-7_NDR_825	4.94138	*
chr1	11585700	11585840	MCF-7_NDR_826	3.72944	*
chr1	11597100	11597280	MCF-7_NDR_827	4.29626	*
chr1	11601380	11601560	MCF-7_NDR_828	5.77931	*
chr1	11610840	11611020	MCF-7_NDR_829	6.0708	*
chr1	11624640	11624840	MCF-7_NDR_830	9.91058	*
chr1	11629900	11630080	MCF-7_NDR_831	7.66544	*
chr1	11630920	11631060	MCF-7_NDR_832	4.40227	*
chr1	11632260	11632540	MCF-7_NDR_833	6.3742	*
chr1	11637980	11638140	MCF-7_NDR_834	5.24166	*
chr1	11645920	11646060	MCF-7_NDR_835	3.39091	*
chr1	11661000	11661180	MCF-7_NDR_836	6.21703	*
chr1	11669460	11669620	MCF-7_NDR_837	5.96186	*
chr1	11685780	11685920	MCF-7_NDR_838	4.54929	*
chr1	11705780	11706000	MCF-7_NDR_839	5.73726	*
chr1	11709120	11709280	MCF-7_NDR_840	6.81852	*
chr1	11710520	11710700	MCF-7_NDR_841	7.18044	*
chr1	11741420	11741600	MCF-7_NDR_842	5.66392	*
chr1	11751500	11751660	MCF-7_NDR_843	4.49019	*
chr1	11767860	11768020	MCF-7_NDR_844	5.28417	*
chr1	11779700	11779880	MCF-7_NDR_845	5.80245	*
chr1	11786480	11786620	MCF-7_NDR_846	3.76676	*
chr1	11787860	11788000	MCF-7_NDR_847	4.6971	*
chr1	11809380	11809560	MCF-7_NDR_848	6.12601	*
chr1	11822680	11822860	MCF-7_NDR_849	6.42987	*
chr1	11837000	11837160	MCF-7_NDR_850	4.1877	*
chr1	11847680	11847860	MCF-7_NDR_851	8.80748	*
chr1	11851080	11851280	MCF-7_NDR_852	7.09044	*
chr1	11852160	11852320	MCF-7_NDR_853	5.10494	*
chr1	11863120	11863360	MCF-7_NDR_854	9.35549	*
chr1	11863620	11863760	MCF-7_NDR_855	6.20673	*
chr1	11865740	11865940	MCF-7_NDR_856	8.44289	*
chr1	11898860	11899020	MCF-7_NDR_857	6.33732	*
chr1	11919400	11919560	MCF-7_NDR_858	5.14454	*
chr1	11925760	11925920	MCF-7_NDR_859	5.35736	*
chr1	11929900	11930060	MCF-7_NDR_860	6.92819	*
chr1	11930980	11931140	MCF-7_NDR_861	4.08048	*
chr1	11961520	11961760	MCF-7_NDR_862	8.50017	*
chr1	11969760	11970020	MCF-7_NDR_863	7.14053	*
chr1	11985780	11985960	MCF-7_NDR_864	6.69391	*
chr1	11986380	11986540	MCF-7_NDR_865	6.49794	*
chr1	12000700	12000880	MCF-7_NDR_866	6.25559	*
chr1	12029480	12029640	MCF-7_NDR_867	4.86176	*
chr1	12040820	12041000	MCF-7_NDR_868	5.87325	*
chr1	12069320	12069500	MCF-7_NDR_869	5.39038	*
chr1	12079200	12079380	MCF-7_NDR_870	6.09369	*
chr1	12091360	12091520	MCF-7_NDR_871	5.24995	*
chr1	12096120	12096280	MCF-7_NDR_872	5.49929	*
chr1	12113540	12113680	MCF-7_NDR_873	4.60046	*
chr1	12139800	12139980	MCF-7_NDR_874	6.20733	*
chr1	12144280	12144420	MCF-7_NDR_875	4.14668	*
chr1	12185000	12185160	MCF-7_NDR_876	6.11729	*
chr1	12192320	12192540	MCF-7_NDR_877	7.62882	*
chr1	12193200	12193380	MCF-7_NDR_878	9.1616	*
chr1	12195820	12195980	MCF-7_NDR_879	4.40261	*
chr1	12203780	12203980	MCF-7_NDR_880	9.9557	*
chr1	12204020	12204200	MCF-7_NDR_881	7.13722	*
chr1	12229760	12229900	MCF-7_NDR_882	4.15871	*
chr1	12230320	12230520	MCF-7_NDR_883	8.02946	*
chr1	12244100	12244240	MCF-7_NDR_884	4.98082	*
chr1	12251180	12251320	MCF-7_NDR_885	4.28989	*
chr1	12251600	12251740	MCF-7_NDR_886	4.27998	*
chr1	12275540	12275720	MCF-7_NDR_887	5.95278	*
chr1	12292300	12292480	MCF-7_NDR_888	7.5852	*
chr1	12332260	12332440	MCF-7_NDR_889	6.35861	*
chr1	12335500	12335740	MCF-7_NDR_890	3.54636	*
chr1	12374440	12374700	MCF-7_NDR_891	6.33516	*
chr1	12441400	12441700	MCF-7_NDR_892	7.32776	*
chr1	12458680	12458840	MCF-7_NDR_893	5.43381	*
chr1	12467540	12467800	MCF-7_NDR_894	6.54019	*
chr1	12493800	12493960	MCF-7_NDR_895	5.67297	*
chr1	12538080	12538660	MCF-7_NDR_896	12.5158	*
chr1	12540860	12541060	MCF-7_NDR_897	10.5026	*
chr1	12545760	12545940	MCF-7_NDR_898	5.63516	*
chr1	12588720	12588880	MCF-7_NDR_899	4.61071	*
chr1	12610060	12610220	MCF-7_NDR_900	7.19202	*
chr1	12612960	12613120	MCF-7_NDR_901	4.89108	*
chr1	12616540	12616720	MCF-7_NDR_902	6.31726	*
chr1	12633840	12633980	MCF-7_NDR_903	4.14111	*
chr1	12655940	12656200	MCF-7_NDR_904	12.3789	*
chr1	12658060	12658240	MCF-7_NDR_905	6.95188	*
chr1	12664400	12664680	MCF-7_NDR_906	7.71021	*
chr1	12676000	12676160	MCF-7_NDR_907	4.25924	*
chr1	12678280	12678520	MCF-7_NDR_908	10.9288	*
chr1	12679180	12679340	MCF-7_NDR_909	5.479	*
chr1	12679440	12679580	MCF-7_NDR_910	6.08195	*
chr1	12679860	12680060	MCF-7_NDR_911	10.7061	*
chr1	12719020	12719320	MCF-7_NDR_912	8.04546	*
chr1	12803000	12803160	MCF-7_NDR_913	6.18474	*
chr1	12803620	12803800	MCF-7_NDR_914	5.8697	*
chr1	12816920	12817060	MCF-7_NDR_915	4.34813	*
chr1	12822760	12822920	MCF-7_NDR_916	6.54377	*
chr1	12841700	12841980	MCF-7_NDR_917	9.86566	*
chr1	12848220	12848360	MCF-7_NDR_918	5.22148	*
chr1	12852720	12852860	MCF-7_NDR_919	4.56608	*
chr1	12870780	12870920	MCF-7_NDR_920	5.79599	*
chr1	12911840	12912020	MCF-7_NDR_921	5.5538	*
chr1	12937200	12937340	MCF-7_NDR_922	5.09682	*
chr1	13002640	13002820	MCF-7_NDR_923	6.81328	*
chr1	13147040	13147180	MCF-7_NDR_924	4.52648	*
chr1	13155460	13155620	MCF-7_NDR_925	6.83153	*
chr1	13200940	13201120	MCF-7_NDR_926	9.34259	*
chr1	13492860	13493000	MCF-7_NDR_927	6.41565	*
chr1	13776820	13776980	MCF-7_NDR_928	6.5191	*
chr1	13782240	13782420	MCF-7_NDR_929	7.49602	*
chr1	13795940	13796100	MCF-7_NDR_930	5.44021	*
chr1	13806140	13806320	MCF-7_NDR_931	5.76096	*
chr1	13820580	13820760	MCF-7_NDR_932	6.39406	*
chr1	13831980	13832140	MCF-7_NDR_933	6.35537	*
chr1	13882820	13883020	MCF-7_NDR_934	7.89142	*
chr1	13995560	13995720	MCF-7_NDR_935	4.72645	*
chr1	14075720	14075880	MCF-7_NDR_936	7.43935	*
chr1	14076040	14076200	MCF-7_NDR_937	5.20879	*
chr1	14078220	14078380	MCF-7_NDR_938	4.79523	*
chr1	14084300	14084480	MCF-7_NDR_939	6.74792	*
chr1	14085680	14085960	MCF-7_NDR_940	21.0503	*
chr1	14087560	14087760	MCF-7_NDR_941	8.50626	*
chr1	14089140	14089280	MCF-7_NDR_942	4.50296	*
chr1	14125320	14125620	MCF-7_NDR_943	11.4797	*
chr1	14133780	14134040	MCF-7_NDR_944	7.08126	*
chr1	14219160	14219340	MCF-7_NDR_945	7.72146	*
chr1	14256820	14256980	MCF-7_NDR_946	7.1797	*
chr1	14292320	14292600	MCF-7_NDR_947	7.11955	*
chr1	14294580	14294740	MCF-7_NDR_948	4.67153	*
chr1	14301680	14301820	MCF-7_NDR_949	4.09647	*
chr1	14346140	14346280	MCF-7_NDR_950	5.53232	*
chr1	14464740	14464880	MCF-7_NDR_951	5.09542	*
chr1	14517160	14517360	MCF-7_NDR_952	9.58542	*
chr1	14617820	14618060	MCF-7_NDR_953	15.2094	*
chr1	14687580	14687840	MCF-7_NDR_954	10.7407	*
chr1	14692920	14693100	MCF-7_NDR_955	11.4058	*
chr1	14777820	14777960	MCF-7_NDR_956	3.76853	*
chr1	14816040	14816180	MCF-7_NDR_957	4.43165	*
chr1	14904720	14904900	MCF-7_NDR_958	7.02342	*
chr1	14930640	14930800	MCF-7_NDR_959	4.81905	*
chr1	14934880	14935040	MCF-7_NDR_960	5.01318	*
chr1	15105820	15105960	MCF-7_NDR_961	5.88751	*
chr1	15114700	15114840	MCF-7_NDR_962	4.19392	*
chr1	15173220	15173360	MCF-7_NDR_963	3.56131	*
chr1	15173880	15174020	MCF-7_NDR_964	4.1097	*
chr1	15176640	15176780	MCF-7_NDR_965	4.83795	*
chr1	15177120	15177260	MCF-7_NDR_966	3.3916	*
chr1	15193460	15193700	MCF-7_NDR_967	6.2924	*
chr1	15207460	15207640	MCF-7_NDR_968	5.33027	*
chr1	15221300	15221620	MCF-7_NDR_969	9.08015	*
chr1	15226380	15226520	MCF-7_NDR_970	5.5432	*
chr1	15249920	15250080	MCF-7_NDR_971	5.28811	*
chr1	15250560	15250760	MCF-7_NDR_972	11.1639	*
chr1	15261520	15261660	MCF-7_NDR_973	4.03186	*
chr1	15291680	15291820	MCF-7_NDR_974	4.40045	*
chr1	15295060	15295200	MCF-7_NDR_975	5.16005	*
chr1	15322580	15322720	MCF-7_NDR_976	4.06465	*
chr1	15328920	15329060	MCF-7_NDR_977	4.50284	*
chr1	15354840	15355000	MCF-7_NDR_978	3.66663	*
chr1	15373080	15373220	MCF-7_NDR_979	4.80654	*
chr1	15383440	15383600	MCF-7_NDR_980	5.222	*
chr1	15400120	15400260	MCF-7_NDR_981	4.16206	*
chr1	15403460	15403600	MCF-7_NDR_982	4.07528	*
chr1	15416920	15417240	MCF-7_NDR_983	7.92869	*
chr1	15455140	15455340	MCF-7_NDR_984	12.4715	*
chr1	15466240	15466440	MCF-7_NDR_985	6.74192	*
chr1	15478940	15479100	MCF-7_NDR_986	5.90936	*
chr1	15479200	15479360	MCF-7_NDR_987	5.56277	*
chr1	15500560	15500740	MCF-7_NDR_988	8.70059	*
chr1	15505560	15505720	MCF-7_NDR_989	5.93044	*
chr1	15513100	15513260	MCF-7_NDR_990	4.42285	*
chr1	15523540	15523680	MCF-7_NDR_991	3.98219	*
chr1	15527360	15527500	MCF-7_NDR_992	5.85102	*
chr1	15556440	15556700	MCF-7_NDR_993	13.7905	*
chr1	15567820	15567980	MCF-7_NDR_994	4.10314	*
chr1	15603720	15603860	MCF-7_NDR_995	4.12325	*
chr1	15606100	15606280	MCF-7_NDR_996	7.97153	*
chr1	15610060	15610280	MCF-7_NDR_997	11.6104	*
chr1	15611460	15611640	MCF-7_NDR_998	11.6117	*
chr1	15611660	15611860	MCF-7_NDR_999	11.4491	*
chr1	15611880	15612040	MCF-7_NDR_1000	5.75668	*
chr1	15650060	15650220	MCF-7_NDR_1001	7.32752	*
chr1	15666180	15666380	MCF-7_NDR_1002	7.85432	*
chr1	15668520	15668780	MCF-7_NDR_1003	12.8931	*
chr1	15670940	15671100	MCF-7_NDR_1004	4.48551	*
chr1	15673720	15673860	MCF-7_NDR_1005	4.18188	*
chr1	15679000	15679160	MCF-7_NDR_1006	5.53284	*
chr1	15680940	15681100	MCF-7_NDR_1007	4.22335	*
chr1	15682100	15682240	MCF-7_NDR_1008	3.76562	*
chr1	15692980	15693120	MCF-7_NDR_1009	4.74678	*
chr1	15704000	15704160	MCF-7_NDR_1010	5.15862	*
chr1	15750680	15750940	MCF-7_NDR_1011	9.30211	*
chr1	15756260	15756440	MCF-7_NDR_1012	4.72257	*
chr1	15759560	15759740	MCF-7_NDR_1013	8.27059	*
chr1	15763600	15763780	MCF-7_NDR_1014	4.97196	*
chr1	15784240	15784400	MCF-7_NDR_1015	4.63148	*
chr1	15784940	15785120	MCF-7_NDR_1016	6.88088	*
chr1	15827980	15828220	MCF-7_NDR_1017	10.7705	*
chr1	15850320	15850460	MCF-7_NDR_1018	6.15196	*
chr1	15851040	15851200	MCF-7_NDR_1019	5.48095	*
chr1	15885760	15886040	MCF-7_NDR_1020	9.81918	*
chr1	15886100	15886260	MCF-7_NDR_1021	5.20438	*
chr1	15911660	15911800	MCF-7_NDR_1022	4.78287	*
chr1	15930080	15930300	MCF-7_NDR_1023	13.3632	*
chr1	15943640	15944040	MCF-7_NDR_1024	8.59183	*
chr1	15960480	15960620	MCF-7_NDR_1025	3.97885	*
chr1	15999740	15999880	MCF-7_NDR_1026	3.37573	*
chr1	16034200	16034360	MCF-7_NDR_1027	5.63821	*
chr1	16055440	16055580	MCF-7_NDR_1028	5.22052	*
chr1	16056340	16056480	MCF-7_NDR_1029	4.58824	*
chr1	16061320	16061500	MCF-7_NDR_1030	6.71495	*
chr1	16063100	16063240	MCF-7_NDR_1031	4.37763	*
chr1	16067920	16068200	MCF-7_NDR_1032	7.4304	*
chr1	16070820	16070980	MCF-7_NDR_1033	5.5795	*
chr1	16073120	16073260	MCF-7_NDR_1034	4.8567	*
chr1	16083580	16083760	MCF-7_NDR_1035	4.88335	*
chr1	16085500	16085640	MCF-7_NDR_1036	5.67309	*
chr1	16114600	16114840	MCF-7_NDR_1037	12.878	*
chr1	16118540	16118740	MCF-7_NDR_1038	10.0799	*
chr1	16121620	16122200	MCF-7_NDR_1039	11.1671	*
chr1	16125620	16125840	MCF-7_NDR_1040	8.59293	*
chr1	16126700	16127140	MCF-7_NDR_1041	7.85604	*
chr1	16142080	16142260	MCF-7_NDR_1042	9.93466	*
chr1	16156200	16156500	MCF-7_NDR_1043	7.77104	*
chr1	16159900	16160120	MCF-7_NDR_1044	6.63361	*
chr1	16160800	16161160	MCF-7_NDR_1045	10.7198	*
chr1	16161300	16161500	MCF-7_NDR_1046	7.27351	*
chr1	16162220	16162520	MCF-7_NDR_1047	10.5298	*
chr1	16162540	16162680	MCF-7_NDR_1048	5.01976	*
chr1	16171560	16171740	MCF-7_NDR_1049	5.77986	*
chr1	16173900	16174100	MCF-7_NDR_1050	9.17034	*
chr1	16175760	16176020	MCF-7_NDR_1051	12.873	*
chr1	16212700	16213100	MCF-7_NDR_1052	12.9405	*
chr1	16251340	16251520	MCF-7_NDR_1053	7.23088	*
chr1	16268500	16268660	MCF-7_NDR_1054	4.07648	*
chr1	16332760	16332900	MCF-7_NDR_1055	5.4816	*
chr1	16339140	16339320	MCF-7_NDR_1056	5.44772	*
chr1	16346260	16346420	MCF-7_NDR_1057	5.59557	*
chr1	16365020	16365280	MCF-7_NDR_1058	10.4597	*
chr1	16372360	16372520	MCF-7_NDR_1059	3.90444	*
chr1	16387840	16388040	MCF-7_NDR_1060	7.86065	*
chr1	16394580	16394740	MCF-7_NDR_1061	5.18923	*
chr1	16395000	16395140	MCF-7_NDR_1062	4.07885	*
chr1	16397660	16397800	MCF-7_NDR_1063	4.30236	*
chr1	16403480	16403660	MCF-7_NDR_1064	7.4264	*
chr1	16405560	16405700	MCF-7_NDR_1065	4.98377	*
chr1	16414980	16415120	MCF-7_NDR_1066	5.67461	*
chr1	16417780	16417960	MCF-7_NDR_1067	7.21538	*
chr1	16426520	16426680	MCF-7_NDR_1068	3.61783	*
chr1	16447560	16447880	MCF-7_NDR_1069	15.0422	*
chr1	16469920	16470100	MCF-7_NDR_1070	6.536	*
chr1	16471680	16472100	MCF-7_NDR_1071	11.9456	*
chr1	16472220	16472420	MCF-7_NDR_1072	7.04765	*
chr1	16477800	16477960	MCF-7_NDR_1073	5.35518	*
chr1	16481260	16481420	MCF-7_NDR_1074	4.44665	*
chr1	16490700	16491040	MCF-7_NDR_1075	10.2676	*
chr1	16494420	16494600	MCF-7_NDR_1076	7.87786	*
chr1	16500040	16500400	MCF-7_NDR_1077	13.3883	*
chr1	16502440	16502720	MCF-7_NDR_1078	17.9015	*
chr1	16508400	16508680	MCF-7_NDR_1079	7.25634	*
chr1	16511520	16511700	MCF-7_NDR_1080	6.57519	*
chr1	16524660	16524800	MCF-7_NDR_1081	4.07126	*
chr1	16525540	16525680	MCF-7_NDR_1082	4.78507	*
chr1	16529340	16529500	MCF-7_NDR_1083	4.1315	*
chr1	16533060	16533220	MCF-7_NDR_1084	7.1523	*
chr1	16551880	16552040	MCF-7_NDR_1085	4.80003	*
chr1	16556560	16556700	MCF-7_NDR_1086	4.29108	*
chr1	16563720	16563900	MCF-7_NDR_1087	6.40449	*
chr1	16570940	16571200	MCF-7_NDR_1088	5.81267	*
chr1	16650940	16651120	MCF-7_NDR_1089	5.71052	*
chr1	16661140	16661400	MCF-7_NDR_1090	11.2844	*
chr1	16678620	16678800	MCF-7_NDR_1091	7.25663	*
chr1	16689880	16690100	MCF-7_NDR_1092	16.029	*
chr1	16693340	16693800	MCF-7_NDR_1093	11.0084	*
chr1	16694160	16694300	MCF-7_NDR_1094	6.37858	*
chr1	16717940	16718080	MCF-7_NDR_1095	3.9818	*
chr1	16753540	16753680	MCF-7_NDR_1096	4.40263	*
chr1	16785280	16785420	MCF-7_NDR_1097	3.47039	*
chr1	16796020	16796160	MCF-7_NDR_1098	3.84251	*
chr1	16825640	16825880	MCF-7_NDR_1099	7.77896	*
chr1	16826520	16826720	MCF-7_NDR_1100	8.31242	*
chr1	16830120	16830280	MCF-7_NDR_1101	4.45741	*
chr1	16839980	16840240	MCF-7_NDR_1102	9.186	*
chr1	16840300	16840540	MCF-7_NDR_1103	22.5992	*
chr1	16840960	16841260	MCF-7_NDR_1104	8.20261	*
chr1	16841280	16841460	MCF-7_NDR_1105	5.76358	*
chr1	16852380	16852540	MCF-7_NDR_1106	4.62664	*
chr1	16872280	16872420	MCF-7_NDR_1107	4.79546	*
chr1	16886200	16886460	MCF-7_NDR_1108	16.2597	*
chr1	16890340	16890480	MCF-7_NDR_1109	3.92265	*
chr1	16905620	16905780	MCF-7_NDR_1110	6.22148	*
chr1	16918280	16918620	MCF-7_NDR_1111	14.6763	*
chr1	16921740	16921920	MCF-7_NDR_1112	5.14761	*
chr1	16928960	16929140	MCF-7_NDR_1113	4.88894	*
chr1	16934720	16935140	MCF-7_NDR_1114	83.5246	*
chr1	16938460	16938640	MCF-7_NDR_1115	9.14176	*
chr1	16939120	16939320	MCF-7_NDR_1116	7.49829	*
chr1	16939740	16940000	MCF-7_NDR_1117	9.71129	*
chr1	16940040	16940220	MCF-7_NDR_1118	5.51017	*
chr1	16947520	16947860	MCF-7_NDR_1119	17.585	*
chr1	16950540	16950860	MCF-7_NDR_1120	7.66226	*
chr1	16951440	16951740	MCF-7_NDR_1121	9.78338	*
chr1	16951760	16951920	MCF-7_NDR_1122	4.84825	*
chr1	16952860	16953020	MCF-7_NDR_1123	7.03121	*
chr1	16975100	16975280	MCF-7_NDR_1124	5.09998	*
chr1	17004540	17004820	MCF-7_NDR_1125	11.0492	*
chr1	17029780	17029940	MCF-7_NDR_1126	6.53139	*
chr1	17038640	17038820	MCF-7_NDR_1127	7.43568	*
chr1	17039920	17040180	MCF-7_NDR_1128	5.43036	*
chr1	17043200	17043420	MCF-7_NDR_1129	8.31593	*
chr1	17046900	17047040	MCF-7_NDR_1130	5.15175	*
chr1	17053820	17054000	MCF-7_NDR_1131	6.43916	*
chr1	17076780	17076920	MCF-7_NDR_1132	4.97449	*
chr1	17082000	17082180	MCF-7_NDR_1133	5.86137	*
chr1	17084240	17084400	MCF-7_NDR_1134	4.50926	*
chr1	17088080	17088220	MCF-7_NDR_1135	5.18518	*
chr1	17090120	17090260	MCF-7_NDR_1136	3.97427	*
chr1	17106580	17106720	MCF-7_NDR_1137	4.41545	*
chr1	17199940	17200120	MCF-7_NDR_1138	6.43454	*
chr1	17222000	17222320	MCF-7_NDR_1139	8.17847	*
chr1	17222440	17222960	MCF-7_NDR_1140	13.9459	*
chr1	17223160	17223340	MCF-7_NDR_1141	7.76578	*
chr1	17225900	17226040	MCF-7_NDR_1142	4.6912	*
chr1	17229680	17229820	MCF-7_NDR_1143	4.94429	*
chr1	17230520	17230660	MCF-7_NDR_1144	4.63167	*
chr1	17231340	17231580	MCF-7_NDR_1145	21.1491	*
chr1	17231680	17231840	MCF-7_NDR_1146	4.91222	*
chr1	17236360	17236540	MCF-7_NDR_1147	7.1763	*
chr1	17240380	17240560	MCF-7_NDR_1148	7.30327	*
chr1	17248900	17249040	MCF-7_NDR_1149	4.10659	*
chr1	17272500	17272680	MCF-7_NDR_1150	3.97169	*
chr1	17289080	17289260	MCF-7_NDR_1151	4.07073	*
chr1	17290120	17290280	MCF-7_NDR_1152	6.51487	*
chr1	17372620	17372760	MCF-7_NDR_1153	7.1337	*
chr1	17372780	17372920	MCF-7_NDR_1154	4.67177	*
chr1	17380460	17380800	MCF-7_NDR_1155	7.53473	*
chr1	17386180	17386380	MCF-7_NDR_1156	11.9333	*
chr1	17394540	17394700	MCF-7_NDR_1157	5.26407	*
chr1	17424580	17424740	MCF-7_NDR_1158	6.12402	*
chr1	17436840	17437020	MCF-7_NDR_1159	8.89033	*
chr1	17445860	17446120	MCF-7_NDR_1160	6.0822	*
chr1	17448200	17448340	MCF-7_NDR_1161	5.17019	*
chr1	17452140	17452540	MCF-7_NDR_1162	10.7403	*
chr1	17493480	17493620	MCF-7_NDR_1163	4.40915	*
chr1	17519800	17519960	MCF-7_NDR_1164	4.70697	*
chr1	17552960	17553200	MCF-7_NDR_1165	6.78171	*
chr1	17553360	17553520	MCF-7_NDR_1166	4.67393	*
chr1	17555980	17556180	MCF-7_NDR_1167	8.25345	*
chr1	17556760	17556900	MCF-7_NDR_1168	5.81443	*
chr1	17559640	17559840	MCF-7_NDR_1169	6.88656	*
chr1	17563640	17563840	MCF-7_NDR_1170	5.25578	*
chr1	17566000	17566220	MCF-7_NDR_1171	7.29641	*
chr1	17577140	17577440	MCF-7_NDR_1172	11.166	*
chr1	17580120	17580260	MCF-7_NDR_1173	4.57179	*
chr1	17603020	17603320	MCF-7_NDR_1174	7.07153	*
chr1	17616360	17616560	MCF-7_NDR_1175	9.71925	*
chr1	17618860	17619080	MCF-7_NDR_1176	13.2515	*
chr1	17619460	17619640	MCF-7_NDR_1177	6.02957	*
chr1	17624060	17624200	MCF-7_NDR_1178	4.78652	*
chr1	17645480	17645620	MCF-7_NDR_1179	5.46936	*
chr1	17674820	17675160	MCF-7_NDR_1180	7.37694	*
chr1	17678780	17678940	MCF-7_NDR_1181	4.91234	*
chr1	17691800	17691960	MCF-7_NDR_1182	3.90009	*
chr1	17693800	17693980	MCF-7_NDR_1183	6.72294	*
chr1	17703940	17704080	MCF-7_NDR_1184	5.30537	*
chr1	17729540	17729740	MCF-7_NDR_1185	6.43197	*
chr1	17755100	17755280	MCF-7_NDR_1186	9.8244	*
chr1	17764780	17764940	MCF-7_NDR_1187	5.47458	*
chr1	17766100	17766500	MCF-7_NDR_1188	15.1724	*
chr1	17767920	17768240	MCF-7_NDR_1189	12.9851	*
chr1	17768280	17768480	MCF-7_NDR_1190	7.27157	*
chr1	17778720	17778900	MCF-7_NDR_1191	6.29377	*
chr1	17802240	17802460	MCF-7_NDR_1192	9.22193	*
chr1	17803880	17804080	MCF-7_NDR_1193	16.1504	*
chr1	17811840	17811980	MCF-7_NDR_1194	5.28208	*
chr1	17817080	17817220	MCF-7_NDR_1195	4.455	*
chr1	17818360	17818540	MCF-7_NDR_1196	6.39957	*
chr1	17820780	17820940	MCF-7_NDR_1197	6.76772	*
chr1	17824860	17825060	MCF-7_NDR_1198	6.18465	*
chr1	17825560	17825740	MCF-7_NDR_1199	4.75463	*
chr1	17828980	17829120	MCF-7_NDR_1200	4.7534	*
chr1	17830400	17830540	MCF-7_NDR_1201	4.25374	*
chr1	17843280	17843500	MCF-7_NDR_1202	10.6379	*
chr1	17846560	17846860	MCF-7_NDR_1203	20.0904	*
chr1	17851360	17851520	MCF-7_NDR_1204	5.37095	*
chr1	17854160	17854340	MCF-7_NDR_1205	7.24603	*
chr1	17855900	17856220	MCF-7_NDR_1206	13.9378	*
chr1	17856560	17856760	MCF-7_NDR_1207	8.21048	*
chr1	17865400	17865580	MCF-7_NDR_1208	9.17984	*
chr1	17873500	17873660	MCF-7_NDR_1209	4.63686	*
chr1	17880500	17880740	MCF-7_NDR_1210	10.7719	*
chr1	17886340	17886560	MCF-7_NDR_1211	9.43572	*
chr1	17887680	17887860	MCF-7_NDR_1212	6.16673	*
chr1	17888240	17888420	MCF-7_NDR_1213	10.3285	*
chr1	17896560	17896700	MCF-7_NDR_1214	5.67385	*
chr1	17908840	17908980	MCF-7_NDR_1215	6.83812	*
chr1	17909000	17909140	MCF-7_NDR_1216	4.93186	*
chr1	17932680	17932820	MCF-7_NDR_1217	3.84975	*
chr1	17938540	17938700	MCF-7_NDR_1218	5.57465	*
chr1	17951340	17951540	MCF-7_NDR_1219	12.861	*
chr1	17970780	17970940	MCF-7_NDR_1220	5.17713	*
chr1	18007000	18007200	MCF-7_NDR_1221	5.78181	*
chr1	18023020	18023160	MCF-7_NDR_1222	5.68054	*
chr1	18027500	18027660	MCF-7_NDR_1223	3.54054	*
chr1	18041000	18041160	MCF-7_NDR_1224	4.47759	*
chr1	18074560	18074700	MCF-7_NDR_1225	4.0278	*
chr1	18097760	18097900	MCF-7_NDR_1226	4.31603	*
chr1	18104480	18104660	MCF-7_NDR_1227	4.88939	*
chr1	18110380	18110560	MCF-7_NDR_1228	4.56627	*
chr1	18131940	18132120	MCF-7_NDR_1229	5.50888	*
chr1	18145820	18145960	MCF-7_NDR_1230	4.46022	*
chr1	18160860	18161020	MCF-7_NDR_1231	5.16169	*
chr1	18167680	18167820	MCF-7_NDR_1232	4.59718	*
chr1	18216840	18216980	MCF-7_NDR_1233	4.82062	*
chr1	18220740	18220880	MCF-7_NDR_1234	5.13235	*
chr1	18241660	18241800	MCF-7_NDR_1235	4.25649	*
chr1	18249480	18249660	MCF-7_NDR_1236	4.73126	*
chr1	18250120	18250260	MCF-7_NDR_1237	4.36494	*
chr1	18256900	18257080	MCF-7_NDR_1238	6.13911	*
chr1	18276540	18276680	MCF-7_NDR_1239	4.28064	*
chr1	18277400	18277540	MCF-7_NDR_1240	5.44291	*
chr1	18281680	18281840	MCF-7_NDR_1241	5.36645	*
chr1	18281900	18282040	MCF-7_NDR_1242	5.76362	*
chr1	18292080	18292240	MCF-7_NDR_1243	4.13737	*
chr1	18292920	18293080	MCF-7_NDR_1244	5.30601	*
chr1	18325480	18325640	MCF-7_NDR_1245	4.79196	*
chr1	18368760	18368900	MCF-7_NDR_1246	4.21166	*
chr1	18385600	18385780	MCF-7_NDR_1247	5.05249	*
chr1	18395340	18395500	MCF-7_NDR_1248	4.8522	*
chr1	18436580	18436740	MCF-7_NDR_1249	4.54722	*
chr1	18438620	18438760	MCF-7_NDR_1250	5.59059	*
chr1	18460960	18461100	MCF-7_NDR_1251	3.52207	*
chr1	18471540	18471720	MCF-7_NDR_1252	5.09737	*
chr1	18509400	18509620	MCF-7_NDR_1253	7.55333	*
chr1	18528480	18528640	MCF-7_NDR_1254	5.10343	*
chr1	18528680	18528840	MCF-7_NDR_1255	6.22608	*
chr1	18546380	18546540	MCF-7_NDR_1256	5.34172	*
chr1	18564780	18564920	MCF-7_NDR_1257	3.82311	*
chr1	18582900	18583060	MCF-7_NDR_1258	6.16207	*
chr1	18584480	18584640	MCF-7_NDR_1259	4.80159	*
chr1	18589660	18589820	MCF-7_NDR_1260	4.82443	*
chr1	18599400	18599540	MCF-7_NDR_1261	3.931	*
chr1	18602740	18602900	MCF-7_NDR_1262	4.8782	*
chr1	18626380	18626520	MCF-7_NDR_1263	5.19113	*
chr1	18636540	18636700	MCF-7_NDR_1264	4.01357	*
chr1	18660240	18660400	MCF-7_NDR_1265	4.24841	*
chr1	18665780	18665920	MCF-7_NDR_1266	5.80441	*
chr1	18686880	18687080	MCF-7_NDR_1267	8.67701	*
chr1	18688180	18688340	MCF-7_NDR_1268	3.99187	*
chr1	18726900	18727120	MCF-7_NDR_1269	8.99518	*
chr1	18740600	18740740	MCF-7_NDR_1270	5.43574	*
chr1	18756660	18756800	MCF-7_NDR_1271	3.90619	*
chr1	18760920	18761080	MCF-7_NDR_1272	4.89747	*
chr1	18767280	18767420	MCF-7_NDR_1273	5.47715	*
chr1	18791160	18791320	MCF-7_NDR_1274	5.74428	*
chr1	18806760	18806940	MCF-7_NDR_1275	5.2356	*
chr1	18807200	18807380	MCF-7_NDR_1276	6.31964	*
chr1	18807920	18808080	MCF-7_NDR_1277	4.17894	*
chr1	18857500	18857700	MCF-7_NDR_1278	5.5282	*
chr1	18862080	18862280	MCF-7_NDR_1279	9.39366	*
chr1	18872720	18872900	MCF-7_NDR_1280	7.34976	*
chr1	18882920	18883120	MCF-7_NDR_1281	7.74608	*
chr1	18887360	18887500	MCF-7_NDR_1282	5.17222	*
chr1	18894380	18894520	MCF-7_NDR_1283	4.2469	*
chr1	18901220	18901380	MCF-7_NDR_1284	4.2506	*
chr1	18902180	18902360	MCF-7_NDR_1285	5.60344	*
chr1	18904860	18905020	MCF-7_NDR_1286	8.31455	*
chr1	18911300	18911540	MCF-7_NDR_1287	9.68853	*
chr1	18914780	18914920	MCF-7_NDR_1288	3.51114	*
chr1	18933560	18933760	MCF-7_NDR_1289	8.48393	*
chr1	18938720	18938880	MCF-7_NDR_1290	4.47168	*
chr1	18942500	18942640	MCF-7_NDR_1291	4.09118	*
chr1	18948220	18948360	MCF-7_NDR_1292	3.96605	*
chr1	18961600	18961760	MCF-7_NDR_1293	5.27381	*
chr1	18963520	18963660	MCF-7_NDR_1294	3.91833	*
chr1	18995280	18995500	MCF-7_NDR_1295	15.0405	*
chr1	19005880	19006040	MCF-7_NDR_1296	5.67219	*
chr1	19007960	19008200	MCF-7_NDR_1297	7.85777	*
chr1	19027340	19027480	MCF-7_NDR_1298	4.66122	*
chr1	19032420	19032580	MCF-7_NDR_1299	6.28806	*
chr1	19046640	19046820	MCF-7_NDR_1300	4.58004	*
chr1	19051600	19051740	MCF-7_NDR_1301	5.46049	*
chr1	19068620	19068780	MCF-7_NDR_1302	5.10282	*
chr1	19069540	19069680	MCF-7_NDR_1303	5.9882	*
chr1	19107360	19107520	MCF-7_NDR_1304	6.16856	*
chr1	19115740	19115880	MCF-7_NDR_1305	3.68994	*
chr1	19127500	19127640	MCF-7_NDR_1306	5.12303	*
chr1	19139680	19139820	MCF-7_NDR_1307	4.58766	*
chr1	19144640	19144820	MCF-7_NDR_1308	4.74122	*
chr1	19145840	19146020	MCF-7_NDR_1309	5.86248	*
chr1	19160840	19161000	MCF-7_NDR_1310	3.55349	*
chr1	19166300	19166440	MCF-7_NDR_1311	4.73072	*
chr1	19229280	19229480	MCF-7_NDR_1312	7.7179	*
chr1	19241860	19242040	MCF-7_NDR_1313	4.01399	*
chr1	19246980	19247140	MCF-7_NDR_1314	5.02674	*
chr1	19249520	19249660	MCF-7_NDR_1315	4.38131	*
chr1	19249860	19250020	MCF-7_NDR_1316	4.39906	*
chr1	19250980	19251140	MCF-7_NDR_1317	6.09698	*
chr1	19258940	19259120	MCF-7_NDR_1318	7.29248	*
chr1	19267680	19267840	MCF-7_NDR_1319	4.75696	*
chr1	19275620	19275760	MCF-7_NDR_1320	4.75529	*
chr1	19281740	19281880	MCF-7_NDR_1321	4.11352	*
chr1	19283180	19283440	MCF-7_NDR_1322	6.46823	*
chr1	19288880	19289060	MCF-7_NDR_1323	6.91742	*
chr1	19316660	19316820	MCF-7_NDR_1324	4.70991	*
chr1	19324140	19324280	MCF-7_NDR_1325	3.95893	*
chr1	19337040	19337200	MCF-7_NDR_1326	5.81327	*
chr1	19337540	19337980	MCF-7_NDR_1327	13.5295	*
chr1	19354600	19354740	MCF-7_NDR_1328	5.86844	*
chr1	19356020	19356240	MCF-7_NDR_1329	11.4151	*
chr1	19361880	19362040	MCF-7_NDR_1330	4.50907	*
chr1	19370520	19370680	MCF-7_NDR_1331	5.78235	*
chr1	19372140	19372300	MCF-7_NDR_1332	4.60362	*
chr1	19422860	19423040	MCF-7_NDR_1333	7.27806	*
chr1	19487540	19487700	MCF-7_NDR_1334	4.26141	*
chr1	19506080	19506360	MCF-7_NDR_1335	10.8063	*
chr1	19529980	19530180	MCF-7_NDR_1336	9.53438	*
chr1	19533600	19533760	MCF-7_NDR_1337	4.27399	*
chr1	19534640	19534780	MCF-7_NDR_1338	5.00799	*
chr1	19536700	19537060	MCF-7_NDR_1339	9.18089	*
chr1	19567940	19568160	MCF-7_NDR_1340	10.4453	*
chr1	19577340	19577500	MCF-7_NDR_1341	6.96724	*
chr1	19581060	19581200	MCF-7_NDR_1342	4.43456	*
chr1	19593840	19593980	MCF-7_NDR_1343	5.73589	*
chr1	19596700	19596880	MCF-7_NDR_1344	6.11159	*
chr1	19615180	19615480	MCF-7_NDR_1345	6.67327	*
chr1	19626800	19626940	MCF-7_NDR_1346	4.24193	*
chr1	19638740	19638900	MCF-7_NDR_1347	6.4579	*
chr1	19640280	19640480	MCF-7_NDR_1348	7.05966	*
chr1	19663240	19663400	MCF-7_NDR_1349	4.88744	*
chr1	19680140	19680320	MCF-7_NDR_1350	6.15235	*
chr1	19686900	19687060	MCF-7_NDR_1351	5.01937	*
chr1	19717680	19717820	MCF-7_NDR_1352	4.60239	*
chr1	19722500	19722680	MCF-7_NDR_1353	4.60008	*
chr1	19733260	19733420	MCF-7_NDR_1354	4.31536	*
chr1	19751560	19751740	MCF-7_NDR_1355	6.29157	*
chr1	19756700	19756860	MCF-7_NDR_1356	5.86286	*
chr1	19766980	19767140	MCF-7_NDR_1357	4.87879	*
chr1	19772320	19772520	MCF-7_NDR_1358	13.1009	*
chr1	19772560	19772740	MCF-7_NDR_1359	9.64557	*
chr1	19777400	19777640	MCF-7_NDR_1360	10.9161	*
chr1	19781100	19781260	MCF-7_NDR_1361	4.50667	*
chr1	19787500	19787640	MCF-7_NDR_1362	5.89138	*
chr1	19791820	19791960	MCF-7_NDR_1363	4.3326	*
chr1	19795960	19796160	MCF-7_NDR_1364	9.37273	*
chr1	19798840	19799000	MCF-7_NDR_1365	6.53706	*
chr1	19811420	19811580	MCF-7_NDR_1366	4.77402	*
chr1	19812420	19812580	MCF-7_NDR_1367	6.31091	*
chr1	19814280	19814460	MCF-7_NDR_1368	6.75446	*
chr1	19852420	19852560	MCF-7_NDR_1369	4.58522	*
chr1	19890020	19890160	MCF-7_NDR_1370	4.72942	*
chr1	19909440	19909600	MCF-7_NDR_1371	7.27657	*
chr1	19923160	19923380	MCF-7_NDR_1372	10.375	*
chr1	19936280	19936440	MCF-7_NDR_1373	4.96073	*
chr1	19969660	19969900	MCF-7_NDR_1374	8.78456	*
chr1	19970440	19970600	MCF-7_NDR_1375	4.8323	*
chr1	19973020	19973220	MCF-7_NDR_1376	9.56905	*
chr1	19986140	19986520	MCF-7_NDR_1377	9.91617	*
chr1	19988240	19988520	MCF-7_NDR_1378	9.39943	*
chr1	20003040	20003200	MCF-7_NDR_1379	4.18252	*
chr1	20029480	20029620	MCF-7_NDR_1380	4.18815	*
chr1	20042040	20042400	MCF-7_NDR_1381	9.50424	*
chr1	20098620	20098800	MCF-7_NDR_1382	7.05359	*
chr1	20113480	20113740	MCF-7_NDR_1383	8.7142	*
chr1	20128880	20129020	MCF-7_NDR_1384	6.07271	*
chr1	20136020	20136240	MCF-7_NDR_1385	10.6028	*
chr1	20204820	20205020	MCF-7_NDR_1386	6.78118	*
chr1	20208640	20208980	MCF-7_NDR_1387	10.1255	*
chr1	20211620	20211760	MCF-7_NDR_1388	4.31807	*
chr1	20230380	20230520	MCF-7_NDR_1389	3.66037	*
chr1	20244600	20244840	MCF-7_NDR_1390	5.94244	*
chr1	20248600	20248960	MCF-7_NDR_1391	9.0704	*
chr1	20284440	20284620	MCF-7_NDR_1392	10.5052	*
chr1	20301340	20301640	MCF-7_NDR_1393	8.67875	*
chr1	20306840	20307060	MCF-7_NDR_1394	8.63311	*
chr1	20308600	20308780	MCF-7_NDR_1395	6.38331	*
chr1	20387120	20387280	MCF-7_NDR_1396	6.05046	*
chr1	20425720	20425880	MCF-7_NDR_1397	4.11575	*
chr1	20431880	20432040	MCF-7_NDR_1398	4.84753	*
chr1	20445700	20445840	MCF-7_NDR_1399	5.29028	*
chr1	20478520	20478660	MCF-7_NDR_1400	5.32857	*
chr1	20511480	20511660	MCF-7_NDR_1401	4.60623	*
chr1	20531560	20531760	MCF-7_NDR_1402	6.44791	*
chr1	20539460	20539820	MCF-7_NDR_1403	12.0312	*
chr1	20543300	20543460	MCF-7_NDR_1404	5.24127	*
chr1	20559400	20559540	MCF-7_NDR_1405	5.24848	*
chr1	20576580	20576740	MCF-7_NDR_1406	5.50797	*
chr1	20576880	20577380	MCF-7_NDR_1407	14.7376	*
chr1	20608760	20608900	MCF-7_NDR_1408	4.3718	*
chr1	20635360	20635500	MCF-7_NDR_1409	4.17636	*
chr1	20637100	20637260	MCF-7_NDR_1410	5.29823	*
chr1	20637340	20637480	MCF-7_NDR_1411	4.59671	*
chr1	20637700	20637840	MCF-7_NDR_1412	4.05839	*
chr1	20641160	20641320	MCF-7_NDR_1413	4.04518	*
chr1	20646080	20646280	MCF-7_NDR_1414	5.91997	*
chr1	20647240	20647380	MCF-7_NDR_1415	4.29224	*
chr1	20683440	20683680	MCF-7_NDR_1416	7.43967	*
chr1	20685260	20685440	MCF-7_NDR_1417	8.12965	*
chr1	20688480	20688620	MCF-7_NDR_1418	5.909	*
chr1	20728260	20728400	MCF-7_NDR_1419	5.53129	*
chr1	20812740	20812900	MCF-7_NDR_1420	5.34149	*
chr1	20813260	20813440	MCF-7_NDR_1421	6.33704	*
chr1	20834560	20834700	MCF-7_NDR_1422	5.62435	*
chr1	20838580	20838760	MCF-7_NDR_1423	6.42509	*
chr1	20849140	20849280	MCF-7_NDR_1424	4.3918	*
chr1	20857600	20857880	MCF-7_NDR_1425	13.9432	*
chr1	20860140	20860300	MCF-7_NDR_1426	4.25825	*
chr1	20865320	20865600	MCF-7_NDR_1427	14.1762	*
chr1	20937740	20937900	MCF-7_NDR_1428	5.70287	*
chr1	20940380	20940760	MCF-7_NDR_1429	12.8984	*
chr1	20947320	20947460	MCF-7_NDR_1430	4.45549	*
chr1	20987060	20987220	MCF-7_NDR_1431	4.0543	*
chr1	20987900	20988080	MCF-7_NDR_1432	5.79764	*
chr1	20988340	20988480	MCF-7_NDR_1433	4.69328	*
chr1	20990980	20991140	MCF-7_NDR_1434	5.40595	*
chr1	21023360	21023640	MCF-7_NDR_1435	8.94634	*
chr1	21048960	21049100	MCF-7_NDR_1436	5.93838	*
chr1	21059540	21059880	MCF-7_NDR_1437	11.7509	*
chr1	21076200	21076360	MCF-7_NDR_1438	6.21677	*
chr1	21113200	21113380	MCF-7_NDR_1439	6.33159	*
chr1	21113780	21113960	MCF-7_NDR_1440	5.88497	*
chr1	21113980	21114200	MCF-7_NDR_1441	15.1758	*
chr1	21162520	21162680	MCF-7_NDR_1442	5.09007	*
chr1	21174620	21174840	MCF-7_NDR_1443	10.0326	*
chr1	21202060	21202260	MCF-7_NDR_1444	7.77344	*
chr1	21223280	21223620	MCF-7_NDR_1445	46.5198	*
chr1	21308480	21308720	MCF-7_NDR_1446	6.74209	*
chr1	21348720	21349060	MCF-7_NDR_1447	13.8568	*
chr1	21390620	21390800	MCF-7_NDR_1448	6.34982	*
chr1	21417640	21417860	MCF-7_NDR_1449	9.16096	*
chr1	21503280	21503600	MCF-7_NDR_1450	7.38447	*
chr1	21515180	21515320	MCF-7_NDR_1451	5.61279	*
chr1	21515960	21516120	MCF-7_NDR_1452	4.14881	*
chr1	21537020	21537160	MCF-7_NDR_1453	4.17698	*
chr1	21546840	21546980	MCF-7_NDR_1454	4.77714	*
chr1	21568340	21568520	MCF-7_NDR_1455	8.80174	*
chr1	21571540	21571680	MCF-7_NDR_1456	4.96123	*
chr1	21578440	21578620	MCF-7_NDR_1457	6.25264	*
chr1	21578720	21578860	MCF-7_NDR_1458	6.58894	*
chr1	21589080	21589240	MCF-7_NDR_1459	5.35689	*
chr1	21623520	21623660	MCF-7_NDR_1460	5.59464	*
chr1	21629280	21629500	MCF-7_NDR_1461	17.4303	*
chr1	21644100	21644240	MCF-7_NDR_1462	3.5905	*
chr1	21646200	21646380	MCF-7_NDR_1463	7.65479	*
chr1	21649420	21649600	MCF-7_NDR_1464	6.09617	*
chr1	21651060	21651480	MCF-7_NDR_1465	15.889	*
chr1	21655980	21656260	MCF-7_NDR_1466	10.6124	*
chr1	21664080	21664240	MCF-7_NDR_1467	4.506	*
chr1	21665380	21665520	MCF-7_NDR_1468	5.7528	*
chr1	21666740	21666940	MCF-7_NDR_1469	8.73866	*
chr1	21669400	21669600	MCF-7_NDR_1470	7.28225	*
chr1	21671900	21672180	MCF-7_NDR_1471	13.9308	*
chr1	21707980	21708140	MCF-7_NDR_1472	5.92388	*
chr1	21710080	21710220	MCF-7_NDR_1473	3.80762	*
chr1	21766480	21766700	MCF-7_NDR_1474	11.4566	*
chr1	21780480	21780740	MCF-7_NDR_1475	11.8282	*
chr1	21791760	21791940	MCF-7_NDR_1476	6.90734	*
chr1	21850060	21850240	MCF-7_NDR_1477	7.10454	*
chr1	21861420	21861660	MCF-7_NDR_1478	18.4162	*
chr1	21870940	21871080	MCF-7_NDR_1479	3.75538	*
chr1	21892540	21892680	MCF-7_NDR_1480	3.87523	*
chr1	21900600	21900780	MCF-7_NDR_1481	5.88143	*
chr1	21914880	21915020	MCF-7_NDR_1482	5.01193	*
chr1	21917300	21917460	MCF-7_NDR_1483	5.45319	*
chr1	21926820	21926960	MCF-7_NDR_1484	4.76021	*
chr1	21934280	21934620	MCF-7_NDR_1485	7.42207	*
chr1	21938600	21938740	MCF-7_NDR_1486	4.68115	*
chr1	21953380	21953900	MCF-7_NDR_1487	14.2018	*
chr1	21958640	21958840	MCF-7_NDR_1488	6.84423	*
chr1	21965160	21965360	MCF-7_NDR_1489	11.5355	*
chr1	21965660	21965840	MCF-7_NDR_1490	6.794	*
chr1	21974440	21974680	MCF-7_NDR_1491	10.6644	*
chr1	21979100	21979240	MCF-7_NDR_1492	5.62103	*
chr1	21979840	21980000	MCF-7_NDR_1493	6.26246	*
chr1	21980080	21980260	MCF-7_NDR_1494	6.00888	*
chr1	21985880	21986060	MCF-7_NDR_1495	6.1448	*
chr1	21989920	21990100	MCF-7_NDR_1496	7.21963	*
chr1	21996440	21996580	MCF-7_NDR_1497	4.24189	*
chr1	21997020	21997180	MCF-7_NDR_1498	4.81196	*
chr1	22002920	22003100	MCF-7_NDR_1499	4.72577	*
chr1	22029860	22030040	MCF-7_NDR_1500	10.3238	*
chr1	22089800	22089960	MCF-7_NDR_1501	4.88883	*
chr1	22091280	22091460	MCF-7_NDR_1502	7.74849	*
chr1	22102620	22102800	MCF-7_NDR_1503	5.52078	*
chr1	22109480	22109640	MCF-7_NDR_1504	7.71877	*
chr1	22114540	22114840	MCF-7_NDR_1505	18.2611	*
chr1	22127740	22127920	MCF-7_NDR_1506	7.45948	*
chr1	22133000	22133140	MCF-7_NDR_1507	4.08167	*
chr1	22137740	22137900	MCF-7_NDR_1508	3.98404	*
chr1	22143480	22143640	MCF-7_NDR_1509	6.17685	*
chr1	22145200	22145400	MCF-7_NDR_1510	16.3658	*
chr1	22160020	22160180	MCF-7_NDR_1511	4.1556	*
chr1	22172800	22172980	MCF-7_NDR_1512	6.61473	*
chr1	22175100	22175280	MCF-7_NDR_1513	4.59261	*
chr1	22182700	22182860	MCF-7_NDR_1514	5.48721	*
chr1	22190060	22190200	MCF-7_NDR_1515	3.70916	*
chr1	22192500	22192640	MCF-7_NDR_1516	4.07407	*
chr1	22195960	22196100	MCF-7_NDR_1517	4.62754	*
chr1	22196300	22196660	MCF-7_NDR_1518	11.5903	*
chr1	22199020	22199160	MCF-7_NDR_1519	4.52922	*
chr1	22205980	22206120	MCF-7_NDR_1520	4.33141	*
chr1	22221900	22222040	MCF-7_NDR_1521	3.87164	*
chr1	22226300	22226460	MCF-7_NDR_1522	5.74289	*
chr1	22266200	22266460	MCF-7_NDR_1523	13.6397	*
chr1	22283180	22283480	MCF-7_NDR_1524	8.5173	*
chr1	22283500	22283740	MCF-7_NDR_1525	8.56152	*
chr1	22287240	22287380	MCF-7_NDR_1526	3.66757	*
chr1	22290620	22290800	MCF-7_NDR_1527	7.4554	*
chr1	22295320	22295460	MCF-7_NDR_1528	3.79035	*
chr1	22307080	22307260	MCF-7_NDR_1529	7.16463	*
chr1	22310300	22310440	MCF-7_NDR_1530	3.8007	*
chr1	22321660	22321820	MCF-7_NDR_1531	4.39426	*
chr1	22331700	22331860	MCF-7_NDR_1532	6.23095	*
chr1	22333060	22333220	MCF-7_NDR_1533	4.88817	*
chr1	22345940	22346080	MCF-7_NDR_1534	3.86344	*
chr1	22369780	22369960	MCF-7_NDR_1535	6.58311	*
chr1	22378960	22379280	MCF-7_NDR_1536	8.71734	*
chr1	22379720	22379880	MCF-7_NDR_1537	6.44837	*
chr1	22380120	22380300	MCF-7_NDR_1538	8.12931	*
chr1	22432300	22432440	MCF-7_NDR_1539	5.81884	*
chr1	22464040	22464200	MCF-7_NDR_1540	4.56644	*
chr1	22469460	22469620	MCF-7_NDR_1541	5.76516	*
chr1	22499640	22499780	MCF-7_NDR_1542	5.92831	*
chr1	22500220	22500380	MCF-7_NDR_1543	4.67771	*
chr1	22531100	22531240	MCF-7_NDR_1544	4.7531	*
chr1	22537900	22538040	MCF-7_NDR_1545	3.8138	*
chr1	22555040	22555240	MCF-7_NDR_1546	11.1075	*
chr1	22559920	22560080	MCF-7_NDR_1547	5.732	*
chr1	22564080	22564220	MCF-7_NDR_1548	5.08488	*
chr1	22573280	22573460	MCF-7_NDR_1549	6.30602	*
chr1	22583940	22584120	MCF-7_NDR_1550	10.2807	*
chr1	22609320	22609460	MCF-7_NDR_1551	3.85361	*
chr1	22611160	22611300	MCF-7_NDR_1552	4.99385	*
chr1	22623460	22623640	MCF-7_NDR_1553	6.82515	*
chr1	22647700	22647840	MCF-7_NDR_1554	4.35867	*
chr1	22651900	22652080	MCF-7_NDR_1555	5.78489	*
chr1	22659680	22659840	MCF-7_NDR_1556	4.57562	*
chr1	22672600	22672740	MCF-7_NDR_1557	5.59254	*
chr1	22701260	22701420	MCF-7_NDR_1558	5.87613	*
chr1	22703260	22703420	MCF-7_NDR_1559	7.13081	*
chr1	22722140	22722300	MCF-7_NDR_1560	3.68286	*
chr1	22739060	22739300	MCF-7_NDR_1561	8.75527	*
chr1	22740780	22741000	MCF-7_NDR_1562	10.3108	*
chr1	22741200	22741380	MCF-7_NDR_1563	6.52354	*
chr1	22747120	22747260	MCF-7_NDR_1564	4.53275	*
chr1	22755680	22755920	MCF-7_NDR_1565	18.7866	*
chr1	22778140	22778420	MCF-7_NDR_1566	6.97428	*
chr1	22778980	22779180	MCF-7_NDR_1567	8.46061	*
chr1	22793940	22794120	MCF-7_NDR_1568	6.05879	*
chr1	22799240	22799440	MCF-7_NDR_1569	8.29899	*
chr1	22875500	22875640	MCF-7_NDR_1570	4.15771	*
chr1	22878700	22878880	MCF-7_NDR_1571	6.36093	*
chr1	22883220	22883400	MCF-7_NDR_1572	6.4373	*
chr1	22890880	22891060	MCF-7_NDR_1573	6.57976	*
chr1	22919620	22919760	MCF-7_NDR_1574	5.76859	*
chr1	22923200	22923360	MCF-7_NDR_1575	5.02343	*
chr1	22938120	22938260	MCF-7_NDR_1576	6.18622	*
chr1	22940260	22940400	MCF-7_NDR_1577	4.6074	*
chr1	22955600	22955840	MCF-7_NDR_1578	9.61295	*
chr1	22963500	22963640	MCF-7_NDR_1579	4.89586	*
chr1	22968380	22968540	MCF-7_NDR_1580	5.28562	*
chr1	22973820	22973960	MCF-7_NDR_1581	4.53602	*
chr1	22980180	22980360	MCF-7_NDR_1582	6.4839	*
chr1	22980460	22980600	MCF-7_NDR_1583	4.76076	*
chr1	22989100	22989260	MCF-7_NDR_1584	6.14895	*
chr1	23002160	23002320	MCF-7_NDR_1585	3.35486	*
chr1	23006800	23006960	MCF-7_NDR_1586	4.9785	*
chr1	23010580	23010720	MCF-7_NDR_1587	4.48625	*
chr1	23043760	23043900	MCF-7_NDR_1588	5.33125	*
chr1	23061080	23061240	MCF-7_NDR_1589	4.82528	*
chr1	23061440	23061640	MCF-7_NDR_1590	8.82478	*
chr1	23102240	23102400	MCF-7_NDR_1591	4.59634	*
chr1	23113780	23113920	MCF-7_NDR_1592	4.40847	*
chr1	23116880	23117040	MCF-7_NDR_1593	4.42705	*
chr1	23145580	23145760	MCF-7_NDR_1594	5.7612	*
chr1	23153360	23153580	MCF-7_NDR_1595	9.21017	*
chr1	23158580	23158920	MCF-7_NDR_1596	12.4106	*
chr1	23169320	23169500	MCF-7_NDR_1597	5.63975	*
chr1	23171880	23172040	MCF-7_NDR_1598	4.00166	*
chr1	23180200	23180340	MCF-7_NDR_1599	4.00958	*
chr1	23229580	23229760	MCF-7_NDR_1600	4.98974	*
chr1	23231400	23231560	MCF-7_NDR_1601	4.55022	*
chr1	23231700	23231880	MCF-7_NDR_1602	4.91533	*
chr1	23238140	23238280	MCF-7_NDR_1603	5.47875	*
chr1	23255040	23255180	MCF-7_NDR_1604	4.34982	*
chr1	23259000	23259140	MCF-7_NDR_1605	3.54095	*
chr1	23263820	23264000	MCF-7_NDR_1606	5.62394	*
chr1	23301180	23301360	MCF-7_NDR_1607	4.97494	*
chr1	23302920	23303380	MCF-7_NDR_1608	9.32411	*
chr1	23346760	23346920	MCF-7_NDR_1609	4.14193	*
chr1	23390340	23390520	MCF-7_NDR_1610	3.54855	*
chr1	23441940	23442100	MCF-7_NDR_1611	5.17821	*
chr1	23479880	23480020	MCF-7_NDR_1612	4.39386	*
chr1	23486060	23486260	MCF-7_NDR_1613	8.49741	*
chr1	23494200	23494380	MCF-7_NDR_1614	6.26029	*
chr1	23514160	23514320	MCF-7_NDR_1615	4.18639	*
chr1	23523300	23523440	MCF-7_NDR_1616	6.08895	*
chr1	23528860	23529040	MCF-7_NDR_1617	5.61147	*
chr1	23573360	23573500	MCF-7_NDR_1618	3.90402	*
chr1	23656160	23656340	MCF-7_NDR_1619	5.51407	*
chr1	23656440	23656720	MCF-7_NDR_1620	7.86121	*
chr1	23668360	23668540	MCF-7_NDR_1621	6.0535	*
chr1	23670100	23670280	MCF-7_NDR_1622	6.64637	*
chr1	23670940	23671120	MCF-7_NDR_1623	6.26838	*
chr1	23671140	23671280	MCF-7_NDR_1624	5.98259	*
chr1	23680820	23680980	MCF-7_NDR_1625	4.31187	*
chr1	23694920	23695100	MCF-7_NDR_1626	6.44012	*
chr1	23695220	23695560	MCF-7_NDR_1627	6.92073	*
chr1	23696020	23696160	MCF-7_NDR_1628	5.25326	*
chr1	23703980	23704140	MCF-7_NDR_1629	5.13766	*
chr1	23711380	23711560	MCF-7_NDR_1630	4.71132	*
chr1	23727200	23727380	MCF-7_NDR_1631	6.1601	*
chr1	23729520	23729760	MCF-7_NDR_1632	7.12045	*
chr1	23730220	23730380	MCF-7_NDR_1633	7.66641	*
chr1	23730480	23730660	MCF-7_NDR_1634	8.38151	*
chr1	23746760	23746920	MCF-7_NDR_1635	5.40063	*
chr1	23759680	23759840	MCF-7_NDR_1636	4.98036	*
chr1	23778480	23778740	MCF-7_NDR_1637	8.01085	*
chr1	23800020	23800180	MCF-7_NDR_1638	5.14201	*
chr1	23803920	23804100	MCF-7_NDR_1639	6.50611	*
chr1	23804940	23805080	MCF-7_NDR_1640	4.01321	*
chr1	23811140	23811360	MCF-7_NDR_1641	7.45282	*
chr1	23815820	23815960	MCF-7_NDR_1642	4.43277	*
chr1	23823700	23823880	MCF-7_NDR_1643	7.78107	*
chr1	23854720	23855020	MCF-7_NDR_1644	14.8854	*
chr1	23855800	23855960	MCF-7_NDR_1645	6.05158	*
chr1	23857020	23857280	MCF-7_NDR_1646	12.9637	*
chr1	23857720	23858060	MCF-7_NDR_1647	15.4712	*
chr1	23881280	23881680	MCF-7_NDR_1648	11.4919	*
chr1	23884840	23884980	MCF-7_NDR_1649	6.41061	*
chr1	23885900	23886240	MCF-7_NDR_1650	15.5559	*
chr1	23888840	23889220	MCF-7_NDR_1651	13.573	*
chr1	23892860	23893020	MCF-7_NDR_1652	5.47953	*
chr1	23912120	23912440	MCF-7_NDR_1653	7.17959	*
chr1	23920160	23920340	MCF-7_NDR_1654	9.88049	*
chr1	23924960	23925160	MCF-7_NDR_1655	6.7703	*
chr1	23938560	23938760	MCF-7_NDR_1656	7.17508	*
chr1	23961480	23961720	MCF-7_NDR_1657	10.5265	*
chr1	23963760	23963920	MCF-7_NDR_1658	5.99839	*
chr1	23977580	23977780	MCF-7_NDR_1659	7.22866	*
chr1	23990400	23990560	MCF-7_NDR_1660	5.54543	*
chr1	23991780	23992080	MCF-7_NDR_1661	5.11294	*
chr1	23999660	23999860	MCF-7_NDR_1662	5.88335	*
chr1	24000080	24000260	MCF-7_NDR_1663	6.32176	*
chr1	24005960	24006140	MCF-7_NDR_1664	6.01288	*
chr1	24018060	24018220	MCF-7_NDR_1665	5.41123	*
chr1	24018240	24018380	MCF-7_NDR_1666	4.56927	*
chr1	24023020	24023180	MCF-7_NDR_1667	6.6318	*
chr1	24045060	24045280	MCF-7_NDR_1668	6.81459	*
chr1	24053920	24054340	MCF-7_NDR_1669	13.6113	*
chr1	24065020	24065160	MCF-7_NDR_1670	4.12468	*
chr1	24065180	24065360	MCF-7_NDR_1671	3.54926	*
chr1	24069440	24069580	MCF-7_NDR_1672	5.02671	*
chr1	24077960	24078120	MCF-7_NDR_1673	6.2866	*
chr1	24098760	24098940	MCF-7_NDR_1674	5.90132	*
chr1	24101880	24102060	MCF-7_NDR_1675	4.59015	*
chr1	24104460	24104600	MCF-7_NDR_1676	5.6271	*
chr1	24106360	24106780	MCF-7_NDR_1677	10.1351	*
chr1	24126080	24126260	MCF-7_NDR_1678	6.49895	*
chr1	24127120	24127500	MCF-7_NDR_1679	7.8598	*
chr1	24127940	24128260	MCF-7_NDR_1680	11.5344	*
chr1	24132460	24132640	MCF-7_NDR_1681	5.94802	*
chr1	24136260	24136460	MCF-7_NDR_1682	8.22164	*
chr1	24165140	24165320	MCF-7_NDR_1683	7.31369	*
chr1	24175640	24175800	MCF-7_NDR_1684	4.46548	*
chr1	24181220	24181380	MCF-7_NDR_1685	5.44429	*
chr1	24234760	24234940	MCF-7_NDR_1686	6.53641	*
chr1	24241940	24242100	MCF-7_NDR_1687	3.79091	*
chr1	24250720	24250860	MCF-7_NDR_1688	5.65207	*
chr1	24263420	24263580	MCF-7_NDR_1689	4.9039	*
chr1	24278220	24278420	MCF-7_NDR_1690	6.94034	*
chr1	24279400	24279540	MCF-7_NDR_1691	4.50414	*
chr1	24283700	24283940	MCF-7_NDR_1692	8.09686	*
chr1	24284860	24285020	MCF-7_NDR_1693	4.17242	*
chr1	24285060	24285220	MCF-7_NDR_1694	5.6773	*
chr1	24285440	24285800	MCF-7_NDR_1695	13.4076	*
chr1	24286040	24286400	MCF-7_NDR_1696	9.47101	*
chr1	24286540	24286720	MCF-7_NDR_1697	7.46095	*
chr1	24287460	24287600	MCF-7_NDR_1698	4.83721	*
chr1	24306540	24306700	MCF-7_NDR_1699	5.27463	*
chr1	24306920	24307100	MCF-7_NDR_1700	6.52607	*
chr1	24338220	24338380	MCF-7_NDR_1701	5.31702	*
chr1	24345100	24345680	MCF-7_NDR_1702	9.57928	*
chr1	24349260	24349440	MCF-7_NDR_1703	7.65775	*
chr1	24372920	24373100	MCF-7_NDR_1704	6.24872	*
chr1	24373760	24373920	MCF-7_NDR_1705	7.53843	*
chr1	24394560	24394740	MCF-7_NDR_1706	9.59264	*
chr1	24397360	24397540	MCF-7_NDR_1707	7.5411	*
chr1	24420920	24421080	MCF-7_NDR_1708	6.56225	*
chr1	24439120	24439340	MCF-7_NDR_1709	8.32225	*
chr1	24444260	24444420	MCF-7_NDR_1710	5.82339	*
chr1	24448660	24448800	MCF-7_NDR_1711	5.38479	*
chr1	24513640	24513900	MCF-7_NDR_1712	6.01359	*
chr1	24528700	24528940	MCF-7_NDR_1713	9.58291	*
chr1	24529100	24529240	MCF-7_NDR_1714	4.88853	*
chr1	24542420	24542560	MCF-7_NDR_1715	4.17016	*
chr1	24542920	24543060	MCF-7_NDR_1716	3.90073	*
chr1	24547060	24547200	MCF-7_NDR_1717	4.48562	*
chr1	24593260	24593460	MCF-7_NDR_1718	6.96542	*
chr1	24601580	24601760	MCF-7_NDR_1719	4.91491	*
chr1	24610360	24610500	MCF-7_NDR_1720	6.83749	*
chr1	24624320	24624480	MCF-7_NDR_1721	4.42436	*
chr1	24645740	24645900	MCF-7_NDR_1722	6.07239	*
chr1	24649940	24650080	MCF-7_NDR_1723	6.42349	*
chr1	24701680	24702220	MCF-7_NDR_1724	12.354	*
chr1	24716640	24716820	MCF-7_NDR_1725	8.83467	*
chr1	24717840	24718080	MCF-7_NDR_1726	8.64688	*
chr1	24718860	24719000	MCF-7_NDR_1727	6.23361	*
chr1	24740280	24740440	MCF-7_NDR_1728	5.07189	*
chr1	24741920	24742260	MCF-7_NDR_1729	9.05354	*
chr1	24802720	24802880	MCF-7_NDR_1730	5.95306	*
chr1	24818540	24818720	MCF-7_NDR_1731	6.04439	*
chr1	24842100	24842380	MCF-7_NDR_1732	19.6114	*
chr1	24867620	24867800	MCF-7_NDR_1733	10.0218	*
chr1	24889080	24889260	MCF-7_NDR_1734	8.98008	*
chr1	24891660	24891840	MCF-7_NDR_1735	4.80524	*
chr1	24894300	24894460	MCF-7_NDR_1736	5.02377	*
chr1	24894560	24894800	MCF-7_NDR_1737	10.3183	*
chr1	24913740	24913940	MCF-7_NDR_1738	12.0251	*
chr1	24924600	24924880	MCF-7_NDR_1739	9.0506	*
chr1	24924940	24925120	MCF-7_NDR_1740	4.96658	*
chr1	24959420	24959600	MCF-7_NDR_1741	6.72605	*
chr1	24961780	24961980	MCF-7_NDR_1742	8.66952	*
chr1	24966180	24966360	MCF-7_NDR_1743	4.40328	*
chr1	24969460	24969820	MCF-7_NDR_1744	12.8862	*
chr1	25010220	25010400	MCF-7_NDR_1745	5.77005	*
chr1	25015180	25015360	MCF-7_NDR_1746	7.46305	*
chr1	25032320	25032460	MCF-7_NDR_1747	4.38156	*
chr1	25034360	25034540	MCF-7_NDR_1748	4.56264	*
chr1	25051460	25051640	MCF-7_NDR_1749	7.4447	*
chr1	25071360	25071580	MCF-7_NDR_1750	12.7168	*
chr1	25098380	25098520	MCF-7_NDR_1751	3.79831	*
chr1	25103080	25103240	MCF-7_NDR_1752	4.24301	*
chr1	25106300	25106440	MCF-7_NDR_1753	4.68307	*
chr1	25125140	25125280	MCF-7_NDR_1754	3.85369	*
chr1	25157240	25157420	MCF-7_NDR_1755	6.09935	*
chr1	25158920	25159060	MCF-7_NDR_1756	5.09583	*
chr1	25161460	25161740	MCF-7_NDR_1757	10.4023	*
chr1	25174600	25174840	MCF-7_NDR_1758	7.64343	*
chr1	25174900	25175040	MCF-7_NDR_1759	5.35944	*
chr1	25191120	25191300	MCF-7_NDR_1760	7.18646	*
chr1	25232200	25232380	MCF-7_NDR_1761	6.78012	*
chr1	25251620	25251780	MCF-7_NDR_1762	4.71992	*
chr1	25266260	25266420	MCF-7_NDR_1763	4.0536	*
chr1	25268500	25268660	MCF-7_NDR_1764	4.02034	*
chr1	25308860	25309020	MCF-7_NDR_1765	4.74942	*
chr1	25314680	25314840	MCF-7_NDR_1766	5.76936	*
chr1	25335440	25335580	MCF-7_NDR_1767	4.4654	*
chr1	25351100	25351240	MCF-7_NDR_1768	4.643	*
chr1	25357980	25358140	MCF-7_NDR_1769	5.79579	*
chr1	25358600	25358760	MCF-7_NDR_1770	4.81307	*
chr1	25360420	25360560	MCF-7_NDR_1771	5.05036	*
chr1	25367940	25368100	MCF-7_NDR_1772	6.76867	*
chr1	25380100	25380280	MCF-7_NDR_1773	6.47978	*
chr1	25393220	25393400	MCF-7_NDR_1774	5.39439	*
chr1	25425960	25426100	MCF-7_NDR_1775	5.22463	*
chr1	25428120	25428260	MCF-7_NDR_1776	6.26002	*
chr1	25468480	25468640	MCF-7_NDR_1777	4.74895	*
chr1	25493740	25493900	MCF-7_NDR_1778	6.13858	*
chr1	25524820	25524960	MCF-7_NDR_1779	3.83622	*
chr1	25531400	25531580	MCF-7_NDR_1780	5.11611	*
chr1	25532260	25532440	MCF-7_NDR_1781	6.17088	*
chr1	25559880	25560080	MCF-7_NDR_1782	12.3068	*
chr1	25566220	25566360	MCF-7_NDR_1783	5.04553	*
chr1	25566560	25566760	MCF-7_NDR_1784	8.43525	*
chr1	25599000	25599160	MCF-7_NDR_1785	3.75488	*
chr1	25610720	25610900	MCF-7_NDR_1786	5.90794	*
chr1	25627560	25627720	MCF-7_NDR_1787	5.5433	*
chr1	25656500	25656700	MCF-7_NDR_1788	11.8644	*
chr1	25664780	25664920	MCF-7_NDR_1789	5.48397	*
chr1	25670380	25670560	MCF-7_NDR_1790	6.19511	*
chr1	25717140	25717280	MCF-7_NDR_1791	4.29217	*
chr1	25805200	25805520	MCF-7_NDR_1792	14.2082	*
chr1	25814220	25814380	MCF-7_NDR_1793	4.32524	*
chr1	25827900	25828060	MCF-7_NDR_1794	5.64768	*
chr1	25830340	25830600	MCF-7_NDR_1795	6.79266	*
chr1	25847320	25847460	MCF-7_NDR_1796	4.09627	*
chr1	25852460	25852640	MCF-7_NDR_1797	6.91345	*
chr1	25878880	25879020	MCF-7_NDR_1798	4.06082	*
chr1	25894800	25895080	MCF-7_NDR_1799	14.5935	*
chr1	25899400	25899560	MCF-7_NDR_1800	4.34265	*
chr1	25916680	25916840	MCF-7_NDR_1801	7.23026	*
chr1	25935120	25935420	MCF-7_NDR_1802	21.0317	*
chr1	25942640	25942820	MCF-7_NDR_1803	7.04596	*
chr1	26012880	26013040	MCF-7_NDR_1804	5.89068	*
chr1	26042560	26042700	MCF-7_NDR_1805	4.68063	*
chr1	26053840	26054080	MCF-7_NDR_1806	6.34716	*
chr1	26063700	26063880	MCF-7_NDR_1807	5.81995	*
chr1	26070640	26070820	MCF-7_NDR_1808	9.24342	*
chr1	26083700	26083860	MCF-7_NDR_1809	6.53291	*
chr1	26085560	26085740	MCF-7_NDR_1810	7.79403	*
chr1	26093280	26093460	MCF-7_NDR_1811	7.59735	*
chr1	26097820	26098020	MCF-7_NDR_1812	7.34501	*
chr1	26099980	26100160	MCF-7_NDR_1813	6.47405	*
chr1	26100240	26100400	MCF-7_NDR_1814	5.29756	*
chr1	26107000	26107180	MCF-7_NDR_1815	5.51308	*
chr1	26121400	26121540	MCF-7_NDR_1816	3.90834	*
chr1	26123500	26123660	MCF-7_NDR_1817	5.9962	*
chr1	26126580	26126720	MCF-7_NDR_1818	5.23292	*
chr1	26144660	26144900	MCF-7_NDR_1819	11.7332	*
chr1	26153160	26153320	MCF-7_NDR_1820	4.31321	*
chr1	26163820	26164000	MCF-7_NDR_1821	5.72151	*
chr1	26185780	26185960	MCF-7_NDR_1822	7.37939	*
chr1	26186640	26186800	MCF-7_NDR_1823	5.89335	*
chr1	26198020	26198160	MCF-7_NDR_1824	4.15126	*
chr1	26202000	26202160	MCF-7_NDR_1825	5.69249	*
chr1	26205340	26205480	MCF-7_NDR_1826	4.57339	*
chr1	26217000	26217380	MCF-7_NDR_1827	13.8697	*
chr1	26231900	26232120	MCF-7_NDR_1828	9.18919	*
chr1	26232880	26233060	MCF-7_NDR_1829	7.34368	*
chr1	26258280	26258440	MCF-7_NDR_1830	4.13936	*
chr1	26297640	26297800	MCF-7_NDR_1831	4.11533	*
chr1	26317540	26317720	MCF-7_NDR_1832	5.82561	*
chr1	26324460	26324620	MCF-7_NDR_1833	6.20494	*
chr1	26331060	26331240	MCF-7_NDR_1834	6.95432	*
chr1	26333980	26334140	MCF-7_NDR_1835	5.29963	*
chr1	26345180	26345400	MCF-7_NDR_1836	12.6118	*
chr1	26349960	26350120	MCF-7_NDR_1837	4.90109	*
chr1	26353680	26353820	MCF-7_NDR_1838	4.19773	*
chr1	26361860	26362040	MCF-7_NDR_1839	6.63578	*
chr1	26370100	26370260	MCF-7_NDR_1840	4.10257	*
chr1	26371560	26371700	MCF-7_NDR_1841	4.53555	*
chr1	26377420	26377680	MCF-7_NDR_1842	6.77379	*
chr1	26391140	26391380	MCF-7_NDR_1843	8.83236	*
chr1	26399160	26399300	MCF-7_NDR_1844	4.68294	*
chr1	26438980	26439140	MCF-7_NDR_1845	4.46986	*
chr1	26448420	26448580	MCF-7_NDR_1846	4.31458	*
chr1	26449720	26449920	MCF-7_NDR_1847	16.534	*
chr1	26450000	26450220	MCF-7_NDR_1848	6.92327	*
chr1	26453020	26453400	MCF-7_NDR_1849	13.2394	*
chr1	26454700	26454860	MCF-7_NDR_1850	5.35173	*
chr1	26503720	26504100	MCF-7_NDR_1851	19.5625	*
chr1	26506940	26507080	MCF-7_NDR_1852	4.37731	*
chr1	26508340	26508500	MCF-7_NDR_1853	5.71548	*
chr1	26528380	26528560	MCF-7_NDR_1854	6.03485	*
chr1	26560320	26560560	MCF-7_NDR_1855	6.60908	*
chr1	26560620	26560780	MCF-7_NDR_1856	5.38803	*
chr1	26606420	26606680	MCF-7_NDR_1857	5.87107	*
chr1	26614060	26614200	MCF-7_NDR_1858	5.81394	*
chr1	26624880	26625100	MCF-7_NDR_1859	7.57194	*
chr1	26627000	26627140	MCF-7_NDR_1860	4.94253	*
chr1	26629280	26629440	MCF-7_NDR_1861	5.4862	*
chr1	26633880	26634020	MCF-7_NDR_1862	5.22578	*
chr1	26644380	26644540	MCF-7_NDR_1863	4.2767	*
chr1	26644660	26644800	MCF-7_NDR_1864	4.16484	*
chr1	26648060	26648340	MCF-7_NDR_1865	6.01988	*
chr1	26684020	26684180	MCF-7_NDR_1866	4.67485	*
chr1	26698640	26698800	MCF-7_NDR_1867	4.71189	*
chr1	26735120	26735280	MCF-7_NDR_1868	5.79107	*
chr1	26743600	26743820	MCF-7_NDR_1869	6.18804	*
chr1	26758480	26758620	MCF-7_NDR_1870	6.70496	*
chr1	26758640	26758920	MCF-7_NDR_1871	13.275	*
chr1	26796860	26797040	MCF-7_NDR_1872	5.01737	*
chr1	26798380	26798640	MCF-7_NDR_1873	8.78378	*
chr1	26799240	26799400	MCF-7_NDR_1874	6.35975	*
chr1	26813680	26813820	MCF-7_NDR_1875	4.92574	*
chr1	26827120	26827280	MCF-7_NDR_1876	6.69901	*
chr1	26827780	26827940	MCF-7_NDR_1877	4.71121	*
chr1	26873720	26873880	MCF-7_NDR_1878	5.59699	*
chr1	26928880	26929060	MCF-7_NDR_1879	11.6486	*
chr1	26946540	26946720	MCF-7_NDR_1880	5.45363	*
chr1	26947840	26948180	MCF-7_NDR_1881	13.533	*
chr1	26953340	26953520	MCF-7_NDR_1882	4.75886	*
chr1	27003940	27004380	MCF-7_NDR_1883	17.9323	*
chr1	27018660	27019200	MCF-7_NDR_1884	14.1793	*
chr1	27019400	27019640	MCF-7_NDR_1885	12.9542	*
chr1	27021960	27022140	MCF-7_NDR_1886	5.6261	*
chr1	27023280	27023440	MCF-7_NDR_1887	5.05374	*
chr1	27024700	27024880	MCF-7_NDR_1888	5.95678	*
chr1	27032220	27032500	MCF-7_NDR_1889	9.96463	*
chr1	27045740	27045980	MCF-7_NDR_1890	9.73804	*
chr1	27055240	27055400	MCF-7_NDR_1891	6.81192	*
chr1	27114540	27114780	MCF-7_NDR_1892	11.3383	*
chr1	27151360	27151520	MCF-7_NDR_1893	6.90492	*
chr1	27158800	27158960	MCF-7_NDR_1894	4.59155	*
chr1	27160220	27160380	MCF-7_NDR_1895	5.79816	*
chr1	27162500	27162640	MCF-7_NDR_1896	4.65059	*
chr1	27175780	27176020	MCF-7_NDR_1897	8.28615	*
chr1	27176900	27177040	MCF-7_NDR_1898	4.20511	*
chr1	27189220	27189700	MCF-7_NDR_1899	9.83776	*
chr1	27191500	27192020	MCF-7_NDR_1900	12.301	*
chr1	27204500	27204800	MCF-7_NDR_1901	8.81325	*
chr1	27230620	27230800	MCF-7_NDR_1902	10.4021	*
chr1	27234220	27234420	MCF-7_NDR_1903	6.98544	*
chr1	27247960	27248300	MCF-7_NDR_1904	9.73673	*
chr1	27267180	27267320	MCF-7_NDR_1905	3.79213	*
chr1	27271340	27271480	MCF-7_NDR_1906	4.05748	*
chr1	27286940	27287120	MCF-7_NDR_1907	6.56655	*
chr1	27293440	27293620	MCF-7_NDR_1908	7.69718	*
chr1	27297420	27297600	MCF-7_NDR_1909	6.30336	*
chr1	27311120	27311260	MCF-7_NDR_1910	4.86057	*
chr1	27334640	27335040	MCF-7_NDR_1911	13.3454	*
chr1	27336180	27336320	MCF-7_NDR_1912	5.09804	*
chr1	27336520	27336660	MCF-7_NDR_1913	6.03047	*
chr1	27339300	27339620	MCF-7_NDR_1914	17.5603	*
chr1	27339960	27340120	MCF-7_NDR_1915	4.68314	*
chr1	27353620	27353800	MCF-7_NDR_1916	7.37733	*
chr1	27365420	27365560	MCF-7_NDR_1917	4.02868	*
chr1	27368060	27368240	MCF-7_NDR_1918	5.4127	*
chr1	27371200	27371340	MCF-7_NDR_1919	5.66213	*
chr1	27372400	27372640	MCF-7_NDR_1920	11.1427	*
chr1	27376220	27376380	MCF-7_NDR_1921	5.54609	*
chr1	27384500	27384680	MCF-7_NDR_1922	8.09038	*
chr1	27388260	27388440	MCF-7_NDR_1923	6.65396	*
chr1	27403600	27403760	MCF-7_NDR_1924	4.42505	*
chr1	27423940	27424220	MCF-7_NDR_1925	9.5026	*
chr1	27429240	27429400	MCF-7_NDR_1926	4.6261	*
chr1	27431540	27431700	MCF-7_NDR_1927	5.31556	*
chr1	27438600	27438860	MCF-7_NDR_1928	6.83227	*
chr1	27444360	27444520	MCF-7_NDR_1929	5.91669	*
chr1	27449200	27449480	MCF-7_NDR_1930	9.26714	*
chr1	27468100	27468420	MCF-7_NDR_1931	12.4042	*
chr1	27469040	27469320	MCF-7_NDR_1932	14.1294	*
chr1	27470900	27471140	MCF-7_NDR_1933	12.9677	*
chr1	27474660	27474800	MCF-7_NDR_1934	4.37808	*
chr1	27479220	27479400	MCF-7_NDR_1935	7.13009	*
chr1	27479800	27479940	MCF-7_NDR_1936	4.68632	*
chr1	27481980	27482160	MCF-7_NDR_1937	5.5295	*
chr1	27489620	27490000	MCF-7_NDR_1938	12.157	*
chr1	27492980	27493120	MCF-7_NDR_1939	4.23657	*
chr1	27519260	27519440	MCF-7_NDR_1940	5.84573	*
chr1	27528380	27528560	MCF-7_NDR_1941	9.61552	*
chr1	27587940	27588080	MCF-7_NDR_1942	4.63242	*
chr1	27611280	27611520	MCF-7_NDR_1943	15.4167	*
chr1	27624440	27624580	MCF-7_NDR_1944	4.00553	*
chr1	27633460	27633700	MCF-7_NDR_1945	11.2268	*
chr1	27648420	27648880	MCF-7_NDR_1946	10.7864	*
chr1	27648960	27649100	MCF-7_NDR_1947	5.2052	*
chr1	27656880	27657040	MCF-7_NDR_1948	4.45467	*
chr1	27659420	27659560	MCF-7_NDR_1949	5.49168	*
chr1	27667940	27668140	MCF-7_NDR_1950	6.44724	*
chr1	27668460	27668660	MCF-7_NDR_1951	8.004	*
chr1	27675780	27676060	MCF-7_NDR_1952	6.67052	*
chr1	27691920	27692180	MCF-7_NDR_1953	8.03481	*
chr1	27693380	27693620	MCF-7_NDR_1954	9.72875	*
chr1	27705300	27705460	MCF-7_NDR_1955	4.55998	*
chr1	27715080	27715220	MCF-7_NDR_1956	5.50412	*
chr1	27718120	27718300	MCF-7_NDR_1957	5.50124	*
chr1	27721940	27722240	MCF-7_NDR_1958	10.1221	*
chr1	27725340	27725520	MCF-7_NDR_1959	5.47386	*
chr1	27743080	27743340	MCF-7_NDR_1960	8.73752	*
chr1	27751600	27751740	MCF-7_NDR_1961	4.28158	*
chr1	27763160	27763320	MCF-7_NDR_1962	5.22291	*
chr1	27823880	27824060	MCF-7_NDR_1963	5.12468	*
chr1	27826780	27826940	MCF-7_NDR_1964	5.14338	*
chr1	27845940	27846080	MCF-7_NDR_1965	4.49438	*
chr1	27864560	27864700	MCF-7_NDR_1966	5.60532	*
chr1	27868940	27869320	MCF-7_NDR_1967	12.9197	*
chr1	27883920	27884100	MCF-7_NDR_1968	7.42322	*
chr1	27884560	27884760	MCF-7_NDR_1969	8.88035	*
chr1	27885760	27885920	MCF-7_NDR_1970	6.32421	*
chr1	27894940	27895120	MCF-7_NDR_1971	6.67535	*
chr1	27895720	27895860	MCF-7_NDR_1972	4.25667	*
chr1	27901640	27901800	MCF-7_NDR_1973	6.12234	*
chr1	27928260	27928480	MCF-7_NDR_1974	8.42235	*
chr1	27928560	27928720	MCF-7_NDR_1975	4.87612	*
chr1	27930620	27930820	MCF-7_NDR_1976	6.76077	*
chr1	27933020	27933180	MCF-7_NDR_1977	6.67081	*
chr1	27937240	27937400	MCF-7_NDR_1978	4.713	*
chr1	27944220	27944400	MCF-7_NDR_1979	6.28335	*
chr1	27955260	27955400	MCF-7_NDR_1980	4.12247	*
chr1	27970420	27970620	MCF-7_NDR_1981	7.56712	*
chr1	27982480	27982620	MCF-7_NDR_1982	3.9308	*
chr1	27989680	27989980	MCF-7_NDR_1983	8.47594	*
chr1	27995700	27995960	MCF-7_NDR_1984	7.86932	*
chr1	27998620	27999040	MCF-7_NDR_1985	14.8597	*
chr1	28010760	28010940	MCF-7_NDR_1986	5.0659	*
chr1	28013120	28013500	MCF-7_NDR_1987	8.74867	*
chr1	28046140	28046320	MCF-7_NDR_1988	8.17854	*
chr1	28071140	28071280	MCF-7_NDR_1989	5.01999	*
chr1	28099440	28099840	MCF-7_NDR_1990	10.1594	*
chr1	28157160	28157420	MCF-7_NDR_1991	11.7226	*
chr1	28184580	28184900	MCF-7_NDR_1992	9.53882	*
chr1	28198880	28199040	MCF-7_NDR_1993	5.80231	*
chr1	28241000	28241140	MCF-7_NDR_1994	7.28883	*
chr1	28241180	28241420	MCF-7_NDR_1995	6.40787	*
chr1	28261440	28261600	MCF-7_NDR_1996	6.61697	*
chr1	28264740	28264880	MCF-7_NDR_1997	4.00426	*
chr1	28272840	28273000	MCF-7_NDR_1998	4.74166	*
chr1	28279940	28280080	MCF-7_NDR_1999	4.14952	*
[truncated: 138,921 more rows]
